# Supplementary material for: Genome-wide identification of cannabinoid biosynthesis genes in non-drug type Cannabis (Cannabis sativa L.) cultivar
Source: J Cannabis Res. 2024 Sep 7;6:35. doi: 10.1186/s42238-024-00246-8 (PMC11380790; doi:10.1186/s42238-024-00246-8)
Supplement: Supplementary file 1 — Supplementary Material 1: Supplementary Table S1. List of DEGs identified from each pairwise comparison of plant tissues (flower, leaf, stem) of hemp Cheungsam. [file 42238_2024_246_MOESM1_ESM.xlsx]

## Sheet: Sheet1
Flower-leaf UP	Flower FPKM	Leaf FPKM	Stem FPKM		Flower-leaf DOWN	Flower FPKM	Leaf FPKM	Stem FPKM		Leaf-stem UP	Flower FPKM	Leaf FPKM	Stem FPKM		Leaf-stem DOWN	Flower FPKM	Leaf FPKM	Stem FPKM		Stem-flower UP	Flower FPKM	Leaf FPKM	Stem FPKM		Stem-flower DOWN	Flower FPKM	Leaf FPKM	Stem FPKM
115715123	148.64	0.237164	0.001		115704999	0.001	0.32772	9.91465		115702701	0.304605	2.8078	0.001		115723031	0.001	0.001	375.626		115723031	0.001	0.001	375.626		115715123	148.64	0.237164	0.001
115700526	133.099	0.001	0.001		115702701	0.304605	2.8078	0.001		115717038	207.429	0.750172	0.0171893		115720517	0.001	0.001	80.0446		115720517	0.001	0.001	80.0446		115700526	133.099	0.001	0.001
115699293	113.627	0.138579	0.001		115714950	0.0514013	2.11214	0.001		115717039	264.136	1.42096	0.022879		115705408	0.001	0.001	32.3866		115705408	0.001	0.001	32.3866		115699293	113.627	0.138579	0.001
115700696	92.1778	0.0188203	0.001		115709577	0.762026	8.59403	0.020419		115699712	9.67587	3.3195	0.001		115711946	0.001	0.122701	27.3977		115711946	0.001	0.122701	27.3977		115700696	92.1778	0.0188203	0.001
115710121	68.2751	0.001	0.001		115701564	0.017901	14.4613	10.0189		115695864	9.48593	1.38393	0.001		115717521	0.001	0.001	17.6845		115717521	0.001	0.001	17.6845		115710121	68.2751	0.001	0.001
115709026	65.826	0.0303203	0.001		115712193	0.103607	3.58589	45.2656		115707811	9.36147	3.94705	0.001		115712054	0.001	0.0334823	13.0312		115712054	0.001	0.0334823	13.0312		115709026	65.826	0.0303203	0.001
115725554	63.1961	0.001	0.001		115722043	1.4844	3.04758	0.00952133		115715325	9.16476	0.399929	0.001		115704999	0.001	0.32772	9.91465		115704999	0.001	0.32772	9.91465		115725554	63.1961	0.001	0.001
115699665	55.2501	0.001	0.001		115713144	0.019234	12.4088	6.82323		115714950	0.0514013	2.11214	0.001		115720997	0.001	0.001	8.64439		115720997	0.001	0.001	8.64439		115699665	55.2501	0.001	0.001
115708947	54.3746	0.001	0.001		115697858	0.158283	3.16653	41.9722		115716929	7.95803	0.99535	0.001		115696251	0.001	0.001	8.41104		115696251	0.001	0.001	8.41104		115708947	54.3746	0.001	0.001
115725415	52.8913	0.023874	0.001		115712422	0.0125653	1.99622	2.61998		115709577	0.762026	8.59403	0.020419		115721048	0.001	0.001	7.29458		115721048	0.001	0.001	7.29458		115725415	52.8913	0.023874	0.001
115725410	50.1473	0.0196473	0.001		115700987	0.415856	1.93485	73.6488		115697560	108.214	0.933547	0.0252673		115697130	0.001	0.001	6.4698		115697130	0.001	0.001	6.4698		115725410	50.1473	0.0196473	0.001
115699015	47.7487	0.001	0.001		115700780	0.0213623	4.64609	3.05505		115722043	1.4844	3.04758	0.00952133		115724726	0.001	0.001	5.96068		115724726	0.001	0.001	5.96068		115699015	47.7487	0.001	0.001
115707391	44.592	0.0598803	0.001		115716157	0.505222	3.4738	0.001		115721128	3.83081	2.79489	0.001		115707258	0.0117117	0.09077	54.3968		115707258	0.0117117	0.09077	54.3968		115707391	44.592	0.0598803	0.001
115723456	43.4033	0.001	0.001		115697003	0.551493	17.2395	0.097866		115714613	3.2229	1.31303	0.001		115715149	0.0115047	0.001	47.1021		115715149	0.0115047	0.001	47.1021		115723456	43.4033	0.001	0.001
115708124	42.2814	0.031824	0.001		115705090	0.880529	4.90583	0.035907		115708355	2.43645	1.00669	0.001		115707066	0.001	0.001	4.41085		115707066	0.001	0.001	4.41085		115708124	42.2814	0.031824	0.001
115719338	39.4711	0.001	0.001		115703511	1.22471	9.91866	0.0792593		115719614	132.926	5.34401	0.113147		115694742	0.011808	0.001	37.5684		115694742	0.011808	0.001	37.5684		115719338	39.4711	0.001	0.001
115710361	34.2522	0.001	0.001		115707338	15.6206	40.4513	0.400393		115703246	23.2116	2.57526	0.024672		115699036	0.001	0.0949863	3.31329		115699036	0.001	0.0949863	3.31329		115710361	34.2522	0.001	0.001
115697568	33.3956	0.001	0.001		115701011	0.613509	2.20448	0.0237587		115704500	122.362	3.27512	0.178266		115718573	0.001	0.001	3.09857		115718573	0.001	0.001	3.09857		115697568	33.3956	0.001	0.001
115698238	29.3914	0.001	0.001		115708094	0.666301	2.3031	0.0254057		115713117	5.22079	0.726559	0.009639		115715893	0.00695167	0.001	17.6494		115715893	0.00695167	0.001	17.6494		115698238	29.3914	0.001	0.001
115713185	28.8812	0.001	0.001		115694830	0.0765597	1.91681	0.02236		115708243	259.399	25.9511	0.498475		115718727	0.001	0.001	2.84479		115718727	0.001	0.001	2.84479		115713185	28.8812	0.001	0.001
115697755	27.7422	0.001	0.001		115694803	0.415804	5.99634	0.0720883		115716157	0.505222	3.4738	0.001		115716720	0.001	0.001	2.83939		115716720	0.001	0.001	2.83939		115697755	27.7422	0.001	0.001
115710028	24.8666	0.29804	0.001		115717034	0.0223397	33.5799	0.408843		115697003	0.551493	17.2395	0.097866		115695897	1.29809	0.00497967	1.37541		115720007	0.001	0.0894563	2.74056		115710028	24.8666	0.29804	0.001
115704946	24.82	0.001	0.001		115712095	1.18789	3.46354	0.044628		115701449	41.1393	4.05511	0.0856097		115720007	0.001	0.0894563	2.74056		115714556	0.0154917	0.001	39.6621		115704946	24.82	0.001	0.001
115723377	24.6473	0.05839	0.001		115715193	0.151715	1.83977	14.0003		115705090	0.880529	4.90583	0.035907		115714556	0.0154917	0.001	39.6621		115706385	0.001	0.103377	2.67597		115723377	24.6473	0.05839	0.001
115724705	22.2928	0.001	0.001		115707154	0.0295297	1.32031	2.6437		115704942	11.744	5.66758	0.0259613		115706385	0.001	0.103377	2.67597		115715642	0.001	0.001	2.67327		115724705	22.2928	0.001	0.001
115715877	22.2584	0.001	0.001		115697891	0.48441	13.198	44.0794		115703511	1.22471	9.91866	0.0792593		115714118	28.3539	0.001	24.5184		115698648	0.001	0.001	2.58982		115715877	22.2584	0.001	0.001
115708181	21.7062	0.280247	0.001		115720385	0.141404	5.11679	0.070639		115721408	26.2378	1.59718	0.0572777		115715642	0.001	0.001	2.67327		115724683	0.001	0.0322457	2.53934		115708181	21.7062	0.280247	0.001
115713215	20.9165	0.107253	0.001		115718111	0.0249557	3.80891	2.05769		115702385	335.684	56.3074	0.741881		115697837	17.1853	0.001	21.6265		115714620	0.001	0.001	2.40576		115713215	20.9165	0.107253	0.001
115699703	19.9537	0.001	0.001		115704335	0.227913	2.29896	0.001		115720530	35.7564	4.33079	0.0827633		115698648	0.001	0.001	2.58982		115721143	0.001	1.03173	2.28392		115699703	19.9537	0.001	0.001
115694904	19.6928	0.001	0.001		115706543	1.91595	18.1142	0.264632		115707338	15.6206	40.4513	0.400393		115724683	0.001	0.0322457	2.53934		115717176	0.001	0.001	2.2643		115694904	19.6928	0.001	0.001
115703170	17.8256	0.001	0.001		115719302	0.265435	2.25251	0.0347777		115708697	93.9927	5.25431	0.229881		115714620	0.001	0.001	2.40576		115715673	0.001	0.001	2.02112		115703170	17.8256	0.001	0.001
115697587	17.824	0.001	0.001		115721274	0.113773	11.1186	9.19104		115705840	44.131	4.68734	0.117788		115721143	0.001	1.03173	2.28392		115710654	0.001	0.001	2.00262		115697587	17.824	0.001	0.001
115711958	17.3102	0.001	0.001		115695326	0.197839	0.993763	0.001		115701011	0.613509	2.20448	0.0237587		115717176	0.001	0.001	2.2643		115703921	0.001	0.0444883	1.92667		115711958	17.3102	0.001	0.001
115695866	16.278	0.972868	0.001		115694826	0.196692	1.63413	15.7768		115708094	0.666301	2.3031	0.0254057		115715673	0.001	0.001	2.02112		115707013	0.001	0.001	1.85564		115695866	16.278	0.972868	0.001
115712047	15.3568	0.001	0.001		115694719	0.0538367	3.67881	4.18728		115697828	1594.39	149.418	4.93679		115710654	0.001	0.001	2.00262		115694827	0.001	0.591397	1.81459		115712047	15.3568	0.001	0.001
115713025	14.7195	0.081825	0.001		115725205	0.036424	1.13439	2.79328		115697814	1361.89	123.565	4.25512		115703921	0.001	0.0444883	1.92667		115721310	0.0194887	0.001	32.8366		115713025	14.7195	0.081825	0.001
115709018	14.3561	0.001	0.001		115711491	1.39678	35.1562	102.177		115715839	17.1386	4.12336	0.0563263		115707013	0.001	0.001	1.85564		115714693	0.001	0.001	1.75638		115709018	14.3561	0.001	0.001
115710210	14.3559	0.001	0.001		115704662	0.182628	2.87275	0.0453613		115715807	55.3511	15.3414	0.181031		115694827	0.001	0.591397	1.81459		115722192	0.001	0.10851	1.57693		115710210	14.3559	0.001	0.001
115698156	14.021	0.001	0.001		115716024	3.56553	32.7298	252.144		115694830	0.0765597	1.91681	0.02236		115721310	0.0194887	0.001	32.8366		115714400	0.001	0.001	1.20859		115698156	14.021	0.001	0.001
115707136	13.789	0.001	0.001		115696830	0.064448	1.23064	4.4883		115725002	49.4019	0.955052	0.162184		115714693	0.001	0.001	1.75638		115698821	0.04535	0.001	36.0987		115707136	13.789	0.001	0.001
115695865	13.7757	0.001	0.001		115696354	0.037854	3.26965	0.0542967		115697724	92.2282	10.2273	0.303054		115722192	0.001	0.10851	1.57693		115701564	0.017901	14.4613	10.0189		115695865	13.7757	0.001	0.001
115715875	13.5918	0.001	0.001		115712861	1.60097	25.6404	110.443		115694803	0.415804	5.99634	0.0720883		115714400	0.001	0.001	1.20859		115697612	0.158068	0.935318	92.306		115715875	13.5918	0.001	0.001
115720666	13.367	0.001	0.001		115709185	5.70642	293.68	4.87281		115694821	0.288213	2.00083	0.001		115698821	0.04535	0.001	36.0987		115699955	0.0193567	0.0314787	9.95187		115720666	13.367	0.001	0.001
115713148	13.3426	0.859114	0.001		115712737	0.870444	45.4775	56.7483		115724762	25.5051	5.94553	0.0911133		115712368	6.14745	0.001	11.9194		115721276	0.001	0.648749	0.461482		115713148	13.3426	0.859114	0.001
115708712	12.9174	0.252029	0.001		115703020	0.341206	15.1192	0.256287		115713279	40.2158	7.75719	0.143567		115697612	0.158068	0.935318	92.306		115707133	0.051372	0.467732	22.6368		115708712	12.9174	0.252029	0.001
115700907	12.8325	0.001	0.001		115724459	1.21326	10.459	78.157		115717034	0.0223397	33.5799	0.408843		115708948	15.3211	0.001	11.514		115712193	0.103607	3.58589	45.2656		115700907	12.8325	0.001	0.001
115717038	207.429	0.750172	0.0171893		115703834	0.231983	0.897983	14.2973		115713286	221.783	49.5101	0.842553		115699955	0.0193567	0.0314787	9.95187		115698856	0.0234537	0.001	9.64428		115717038	207.429	0.750172	0.0171893
115713862	779.077	0.001	0.0635043		115721204	0.339015	24.6065	20.7463		115712095	1.18789	3.46354	0.044628		115707133	0.051372	0.467732	22.6368		115721295	0.001	0.920275	0.414361		115713862	779.077	0.001	0.0635043
115711569	12.2207	0.001	0.001		115712623	1.43115	5.34169	0.0936967		115698717	15.7368	4.48885	0.0622917		115712193	0.103607	3.58589	45.2656		115713144	0.019234	12.4088	6.82323		115711569	12.2207	0.001	0.001
115717039	264.136	1.42096	0.022879		115697736	13.1738	1442.65	25.2147		115724505	46.4548	4.91465	0.183262		115700607	15.4397	0.001	10.1536		115712052	0.0243237	0.116001	8.68448		115717039	264.136	1.42096	0.022879
115707234	11.9287	0.001	0.001		115704237	0.396242	20.4949	0.359976		115701410	35.4222	2.04372	0.1453		115698856	0.0234537	0.001	9.64428		115715950	0.0144643	0.398113	4.93739		115707234	11.9287	0.001	0.001
115697699	11.7812	0.324518	0.001		115723470	0.451256	4.05626	0.0729833		115697362	33.7621	4.33949	0.141858		115712052	0.0243237	0.116001	8.68448		115715000	0.018826	0.0680023	6.05465		115697699	11.7812	0.324518	0.001
115705717	11.727	0.11965	0.001		115725741	0.242722	3.68064	14.4609		115696984	3.11897	0.863152	0.0141773		115715950	0.0144643	0.398113	4.93739		115725334	0.080376	0.113421	26.7605		115705717	11.727	0.11965	0.001
115715178	11.4861	0.0579353	0.001		115698934	0.148722	2.17038	8.83772		115720385	0.141404	5.11679	0.070639		115715000	0.018826	0.0680023	6.05465		115718728	0.0156627	0.001	4.94173		115715178	11.4861	0.0579353	0.001
115713171	11.0673	0.001	0.001		115707367	0.241093	3.7822	0.068573		115715833	18.0134	4.37696	0.0801977		115715003	12.7062	0.001	9.29906		115722005	0.0889187	0.001	28.7218		115713171	11.0673	0.001	0.001
115707531	10.9577	0.001	0.001		115715297	0.10606	3.42141	6.03109		115704335	0.227913	2.29896	0.001		115724593	4.67604	0.001	8.80798		115700287	0.001	0.825436	0.31478		115707531	10.9577	0.001	0.001
115724810	10.8788	0.49347	0.001		115697811	1.26395	27.2363	68.6603		115699139	78.3802	1.54166	0.362433		115725334	0.080376	0.113421	26.7605		115704905	0.0117527	0.001	2.95614		115724810	10.8788	0.49347	0.001
115721849	9.9352	1.96054	0.001		115713059	2.33635	45.0555	126.902		115704995	12.1917	5.89395	0.0585567		115718728	0.0156627	0.001	4.94173		115696828	0.204914	0.468938	55.4907		115721849	9.9352	1.96054	0.001
115699712	9.67587	3.3195	0.001		115714155	0.971339	58.2687	51.0738		115706543	1.91595	18.1142	0.264632		115722005	0.0889187	0.001	28.7218		115711675	0.0279593	0.864011	7.29736		115699712	9.67587	3.3195	0.001
115695864	9.48593	1.38393	0.001		115721687	0.440449	1.28646	22.8299		115719302	0.265435	2.25251	0.0347777		115704905	0.0117527	0.001	2.95614		115697858	0.158283	3.16653	41.9722		115695864	9.48593	1.38393	0.001
115707811	9.36147	3.94705	0.001		115712455	0.370429	16.4554	19.0926		115712639	26.178	11.6411	0.127076		115696828	0.204914	0.468938	55.4907		115725711	0.0406827	0.001	9.77478		115707811	9.36147	3.94705	0.001
115715325	9.16476	0.399929	0.001		115715930	2.00463	71.9616	1.62466		115709616	79.3373	3.91199	0.385135		115711675	0.0279593	0.864011	7.29736		115696650	0.137513	0.852631	31.489		115715325	9.16476	0.399929	0.001
115718532	8.73466	0.001	0.001		115725163	0.85908	25.8966	38.9019		115695326	0.197839	0.993763	0.001		115697858	0.158283	3.16653	41.9722		115720561	0.0181153	0.065701	3.88512		115718532	8.73466	0.001	0.001
115695897	1.29809	0.00497967	1.37541		115708720	0.167014	1.89845	0.044401		115719617	6.83379	3.20054	0.0394403		115725711	0.0406827	0.001	9.77478		115712422	0.0125653	1.99622	2.61998		115713205	8.66135	0.001	0.001
115713205	8.66135	0.001	0.001		115704464	0.703967	22.6859	0.521892		115709624	99.7795	4.71942	0.577458		115696650	0.137513	0.852631	31.489		115696230	0.209609	0.001	45.5386		115722991	8.54933	0.001	0.001
115722991	8.54933	0.001	0.001		115722432	0.273532	1.77636	0.0418633		115702899	2.70385	1.32508	0.0175107		115720561	0.0181153	0.065701	3.88512		115704652	0.51414	0.0346093	111.189		115704407	8.44759	0.001	0.001
115704407	8.44759	0.001	0.001		115705083	0.36652	1.82463	0.0432203		115704662	0.182628	2.87275	0.0453613		115696230	0.209609	0.001	45.5386		115721364	0.144143	0.0294747	30.8643		115712518	8.41437	0.001	0.001
115712518	8.41437	0.001	0.001		115703623	0.256278	4.39888	10.9965		115696354	0.037854	3.26965	0.0542967		115716605	4.26563	0.001	2.52494		115708777	0.0195073	0.939191	3.97359		115719236	232.359	0.001	0.0295457
115719236	232.359	0.001	0.0295457		115703153	1.96383	8.97225	0.218687		115702764	63.5149	3.96468	0.402301		115704652	0.51414	0.0346093	111.189		115718671	0.001	0.690364	0.214537		115718871	8.03325	0.001	0.001
115718871	8.03325	0.001	0.001		115705266	1.70499	33.2576	0.816132		115711534	31.8205	1.60645	0.206757		115710473	4.55915	0.001	7.08138		115708167	0.608077	0.001	123.165		115716929	7.95803	0.99535	0.001
115714118	28.3539	0.001	24.5184		115701008	0.768171	15.0685	0.373086		115709185	5.70642	293.68	4.87281		115712106	7.00396	0.001	7.03463		115715931	0.0275497	0.0187263	5.29786		115707961	7.79988	0.001	0.001
115716929	7.95803	0.99535	0.001		115714426	3.1517	24.2874	0.604217		115696934	4.04354	1.91139	0.0277637		115721364	0.144143	0.0294747	30.8643		115718729	0.0605957	0.030587	11.4679		115702367	130.22	0.206024	0.017869
115707961	7.79988	0.001	0.001		115721291	0.60765	2.5407	24.6457		115703020	0.341206	15.1192	0.256287		115708777	0.0195073	0.939191	3.97359		115719496	0.0920663	0.33204	17.1544		115723393	7.69383	0.0511187	0.001
115697837	17.1853	0.001	21.6265		115711416	0.293915	3.19828	11.7315		115719767	17.3996	0.332475	0.12244		115708167	0.608077	0.001	123.165		115700987	0.415856	1.93485	73.6488		115704879	7.65228	0.001	0.001
115702367	130.22	0.206024	0.017869		115699971	28.6432	668.835	17.4803		115707937	238.807	122.777	1.78126		115715931	0.0275497	0.0187263	5.29786		115717024	0.0220893	0.001	3.42006		115717402	7.53443	0.001	0.001
115723393	7.69383	0.0511187	0.001		115716101	4.51515	119.741	3.22463		115725646	78.2891	34.2391	0.593186		115718729	0.0605957	0.030587	11.4679		115720308	0.0525053	0.179012	7.99112		115695928	61.3382	0.001	0.00915967
115704879	7.65228	0.001	0.001		115708987	0.574406	8.98788	0.243617		115721690	70.9204	1.90271	0.54157		115719496	0.0920663	0.33204	17.1544		115700780	0.0213623	4.64609	3.05505		115705012	7.34823	0.001	0.001
115717402	7.53443	0.001	0.001		115717033	0.032855	22.8464	0.618348		115712623	1.43115	5.34169	0.0936967		115700987	0.415856	1.93485	73.6488		115700226	0.127169	0.001	18.694		115716911	7.12916	0.001	0.001
115695928	61.3382	0.001	0.00915967		115704828	2.27718	50.0594	1.44964		115701203	18.5602	5.71605	0.148098		115702668	5.5126	0.001	6.18849		115720993	0.0180397	0.001	2.50391		115716346	7.0508	0.220105	0.001
115705012	7.34823	0.001	0.001		115713874	0.143777	7.52746	0.223276		115697736	13.1738	1442.65	25.2147		115717024	0.0220893	0.001	3.42006		115705892	0.626472	0.001	90.0185		115709577	0.762026	8.59403	0.020419
115716911	7.12916	0.001	0.001		115704681	3.80439	12.1875	0.369498		115704237	0.396242	20.4949	0.359976		115702360	3.4221	0.001	6.01501		115708648	0.33919	0.424261	46.33		115713864	107.993	0.001	0.016654
115716346	7.0508	0.220105	0.001		115718837	1.32355	27.8331	0.945879		115723470	0.451256	4.05626	0.0729833		115720308	0.0525053	0.179012	7.99112		115698635	0.0554263	0.001	7.40255		115699876	6.82001	0.001	0.001
115713864	107.993	0.001	0.016654		115723385	1.27126	19.8429	49.9225		115708734	14.1047	3.06094	0.11516		115700226	0.127169	0.001	18.694		115718414	0.0160207	0.048323	2.04096		115721427	6.63961	0.280395	0.001
115699876	6.82001	0.001	0.001		115711908	0.954541	8.62488	0.305131		115712629	81.9718	51.2308	0.669937		115720993	0.0180397	0.001	2.50391		115718634	0.0141237	0.025485	1.74475		115724718	6.47861	0.263355	0.001
115721427	6.63961	0.280395	0.001		115725739	3.72977	56.1126	2.01319		115707367	0.241093	3.7822	0.068573		115705892	0.626472	0.001	90.0185		115702524	0.034523	0.001	4.0386		115725713	6.44073	0.001	0.001
115724718	6.47861	0.263355	0.001		115701076	0.905839	2.67392	34.6669		115695781	2.37203	1.44128	0.021824		115709440	795.949	0.001	0.876697		115698844	0.177916	0.128844	20.6996		115722650	6.07644	0.001	0.001
115725713	6.44073	0.001	0.001		115695971	0.533728	2.47675	0.092248		115710104	28.3972	2.57938	0.260186		115708648	0.33919	0.424261	46.33		115698797	0.1295	4.03197	14.9288		115722611	6.03916	0.001	0.001
115722650	6.07644	0.001	0.001		115715847	0.108265	0.601002	3.91349		115718576	0.524646	8.81158	0.161727		115698635	0.0554263	0.001	7.40255		115711243	1.246	2.87221	141.606		115714483	67.4353	0.0315693	0.012783
115722611	6.03916	0.001	0.001		115701247	305.441	614.153	13.1271		115709512	104.491	7.74686	0.995519		115718414	0.0160207	0.048323	2.04096		115718158	0.001	0.0151583	1.30003		115700854	5.68156	0.001	0.001
115714483	67.4353	0.0315693	0.012783		115708163	4.87933	19.9295	0.21473		115724986	9.64355	1.41412	0.0927863		115718634	0.0141237	0.025485	1.74475		115724666	0.033964	0.0915097	3.71292		115697880	5.65301	0.001	0.001
115700854	5.68156	0.001	0.001		115700867	81.4283	1151.22	43.0649		115723014	14.098	3.46412	0.138354		115702524	0.034523	0.001	4.0386		115701405	0.118616	0.075441	13.1616		115719756	264.202	0.001	0.0477793
115697880	5.65301	0.001	0.001		115703954	4.1285	14.8655	0.194857		115720977	41.0584	3.55952	0.424071		115720789	103.038	0.001	0.180532		115724215	0.0268777	0.001	2.87486		115706609	5.38302	0.001	0.001
115719756	264.202	0.001	0.0477793		115723004	1.09553	29.3569	1.11969		115722038	3.8367	2.73105	0.0424887		115698064	9.18353	0.001	5.20196		115711048	0.0750513	0.616585	8.19308		115707556	330.492	0.156544	0.062639
115706609	5.38302	0.001	0.001		115698103	1.25138	14.5281	0.565198		115703115	12.0971	1.38582	0.133603		115698844	0.177916	0.128844	20.6996		115725259	0.0473887	0.001	5.07347		115712238	5.31239	0.001	0.001
115707556	330.492	0.156544	0.062639		115705559	0.121772	4.00963	0.15948		115724983	10.1291	2.21292	0.116535		115698797	0.1295	4.03197	14.9288		115717078	0.120175	0.135691	12.8704		115701261	5.1994	0.202929	0.001
115712238	5.31239	0.001	0.001		115716827	3.62195	88.3522	3.50396		115721441	6.73795	1.67788	0.0816537		115711243	1.246	2.87221	141.606		115723402	0.399412	0.129542	42.3889		115695656	5.18269	0.001	0.001
115712368	6.14745	0.001	11.9194		115712262	8.12744	115.274	4.70224		115697536	7.92768	4.20393	0.102056		115721874	0.84422	0.0126903	1.39146		115710044	0.360543	0.190585	37.1679		115707135	5.16529	0.001	0.001
115701261	5.1994	0.202929	0.001		115698773	15.292	38.2771	0.829616		115715691	22.4678	29.3139	0.296161		115718158	0.001	0.0151583	1.30003		115706515	0.243271	0.090651	24.8754		115725058	5.10116	0.001	0.001
115695656	5.18269	0.001	0.001		115719431	5.69676	61.0268	180.482		115719616	110.721	43.4025	1.45979		115724666	0.033964	0.0915097	3.71292		115706198	0.133113	0.001	13.4149		115723437	353.296	0.001	0.071023
115707135	5.16529	0.001	0.001		115725060	217.422	543.807	11.9045		115699199	1462.18	271.878	19.6003		115701405	0.118616	0.075441	13.1616		115706969	0.203584	0.072943	20.512		115723301	5.04379	0.001	0.001
115725058	5.10116	0.001	0.001		115720837	1.54605	34.0306	1.40225		115706950	156.452	7.53749	2.16666		115724215	0.0268777	0.001	2.87486		115698978	0.242274	0.0821303	23.6608		115709065	5.02097	0.001	0.001
115723437	353.296	0.001	0.071023		115711302	8.90498	171.785	7.19384		115698729	15.5557	2.94672	0.219332		115711048	0.0750513	0.616585	8.19308		115712081	0.098836	0.001	9.46181		115725715	4.98201	0.001	0.001
115723301	5.04379	0.001	0.001		115724416	14.4069	133.575	5.62797		115706491	35.7449	12.0985	0.534112		115725259	0.0473887	0.001	5.07347		115717034	0.0223397	33.5799	0.408843		115722058	4.9238	0.001	0.001
115709065	5.02097	0.001	0.001		115718599	63.0035	238.772	3.68506		115715486	17.6218	3.8086	0.268979		115717078	0.120175	0.135691	12.8704		115716286	4.03792	4.54514	378.188		115703201	4.69519	0.001	0.001
115725715	4.98201	0.001	0.001		115714235	2.23914	16.8478	67.55		115695784	2.78241	1.95618	0.0453527		115723402	0.399412	0.129542	42.3889		115715193	0.151715	1.83977	14.0003		115724480	4.68828	0.001	0.001
115722058	4.9238	0.001	0.001		115699728	0.782039	6.60687	23.2418		115706946	241.339	12.7644	3.857		115709850	349.165	0.001	1.01727		115707154	0.0295297	1.32031	2.6437		115697567	147.001	0.481557	0.0326893
115703201	4.69519	0.001	0.001		115708151	0.327088	1.3559	9.60465		115721015	2.96136	1.95665	0.050119		115710044	0.360543	0.190585	37.1679		115719808	0.075007	0.001	6.77784		115705025	4.63944	0.001	0.001
115724480	4.68828	0.001	0.001		115698263	0.250412	11.2317	0.477841		115697885	71.236	50.8067	1.18859		115706515	0.243271	0.090651	24.8754		115697891	0.48441	13.198	44.0794		115714748	4.61984	0.001	0.001
115697567	147.001	0.481557	0.0326893		115716971	2896.01	7825.35	173.229		115709567	17.4488	23.6913	0.327323		115706198	0.133113	0.001	13.4149		115718155	0.430588	0.001	38.4524		115698199	4.61885	0.0477933	0.001
115705025	4.63944	0.001	0.001		115716003	0.124442	2.57259	3.58113		115715930	2.00463	71.9616	1.62466		115706969	0.203584	0.072943	20.512		115714668	0.110024	3.06095	9.5088		115724498	4.60425	0.316938	0.001
115714748	4.61984	0.001	0.001		115700912	0.473873	7.57992	13.5358		115712603	56.2227	17.4687	1.11441		115724770	1.38488	0.024763	1.38236		115709609	0.167685	0.21273	14.3308		115723168	4.55212	0.001	0.001
115698199	4.61885	0.0477933	0.001		115721731	3.11827	66.1002	2.83464		115708720	0.167014	1.89845	0.044401		115698978	0.242274	0.0821303	23.6608		115718111	0.0249557	3.80891	2.05769		115707440	4.46535	0.001	0.001
115724498	4.60425	0.316938	0.001		115723398	0.0755843	0.22296	2.08724		115704464	0.703967	22.6859	0.521892		115712081	0.098836	0.001	9.46181		115709869	0.095323	0.001	8.03846		115697560	108.214	0.933547	0.0252673
115723168	4.55212	0.001	0.001		115724185	3.77915	90.7343	105.293		115722432	0.273532	1.77636	0.0418633		115725422	1.91381	0.001	0.971664		115709300	0.492265	1.0102	40.4316		115711658	4.37486	0.371914	0.001
115707440	4.46535	0.001	0.001		115701795	1.64312	8.99876	0.39059		115698185	3.77969	2.23869	0.0790173		115712253	1.87897	0.001	2.51695		115721274	0.113773	11.1186	9.19104		115723438	532.309	0.001	0.126344
115708948	15.3211	0.001	11.514		115697503	6.35658	130.967	176.53		115716884	7.47339	4.79037	0.157978		115708131	753.165	0.930458	2.81248		115698657	0.0908873	1.22047	7.32384		115708775	50.3454	0.991924	0.013009
115697560	108.214	0.933547	0.0252673		115705036	3.67689	11.3831	0.235003		115716879	9.80011	1.0671	0.208043		115716286	4.03792	4.54514	378.188		115708820	0.08788	0.722231	7.03194		115703581	25.4788	0.001	0.007084
115711658	4.37486	0.371914	0.001		115724029	0.292617	6.55756	4.69073		115723007	3.15445	3.10938	0.0680313		115705868	1.15195	0.0215997	0.865886		115697363	0.034599	0.001	2.71984		115706133	4.17538	0.001	0.001
115723438	532.309	0.001	0.126344		115706443	1.94648	5.05249	0.125786		115705083	0.36652	1.82463	0.0432203		115712146	1.71085	0.001	1.05491		115694826	0.196692	1.63413	15.7768		115704745	4.10599	0.001	0.001
115708775	50.3454	0.991924	0.013009		115716283	1.01938	8.88153	0.387576		115698388	46.9035	19.9525	1.01936		115715193	0.151715	1.83977	14.0003		115718511	0.231535	0.514933	18.3318		115709271	4.08432	0.001	0.001
115703581	25.4788	0.001	0.007084		115717016	29.2845	1035.64	787.387		115715731	5.94216	3.90059	0.13142		115700871	3.61776	0.001	4.07636		115694719	0.0538367	3.67881	4.18728		115696884	4.08173	0.0477033	0.001
115706133	4.17538	0.001	0.001		115722431	0.569576	1.75111	0.0780643		115720602	4.92167	3.14136	0.109981		115720719	1.55483	0.001	2.32726		115725205	0.036424	1.13439	2.79328		115704778	4.07939	0.001	0.001
115704745	4.10599	0.001	0.001		115714912	2.40029	26.3291	63.9927		115703153	1.96383	8.97225	0.218687		115719808	0.075007	0.001	6.77784		115708910	0.187746	0.001	14.6255		115704977	4.04159	0.858556	0.001
115709271	4.08432	0.001	0.001		115714880	0.176847	3.80641	0.001		115714088	220.968	124.616	4.93313		115715816	1.46827	0.001	0.955162		115714376	0.242933	0.350469	18.8166		115722043	1.4844	3.04758	0.00952133
115696884	4.08173	0.0477033	0.001		115697531	2.4269	11.6901	63.3702		115700897	44.2853	33.2892	1.0234		115716455	4.74451	0.001	3.99895		115696963	0.141914	0.001	10.9412		115710309	3.96507	0.001	0.001
115700607	15.4397	0.001	10.1536		115695556	0.039984	1.83798	0.0847293		115705266	1.70499	33.2576	0.816132		115700705	1.38777	0.001	1.5674		115697760	0.102676	0.001	7.5262		115708341	3.96355	0.001	0.001
115704778	4.07939	0.001	0.001		115711472	0.594434	30.0344	14.7737		115701008	0.768171	15.0685	0.373086		115707596	1.96997	0.001	3.88266		115711491	1.39678	35.1562	102.177		115718623	3.93721	0.001	0.001
115704977	4.04159	0.858556	0.001		115700429	0.515898	8.24314	12.5839		115714426	3.1517	24.2874	0.604217		115697891	0.48441	13.198	44.0794		115708111	0.279435	0.001	20.0172		115695926	3.88413	0.157417	0.001
115710309	3.96507	0.001	0.001		115724614	5.00194	29.6047	119.729		115723284	40.9911	6.12167	0.980631		115712860	510.364	0.23738	2.1959		115716024	3.56553	32.7298	252.144		115724622	3.84447	0.001	0.001
115708341	3.96355	0.001	0.001		115701243	0.974308	6.17235	21.4917		115724567	51.7004	75.049	1.34017		115718155	0.430588	0.001	38.4524		115696830	0.064448	1.23064	4.4883		115721128	3.83081	2.79489	0.001
115718623	3.93721	0.001	0.001		115723044	1.08944	22.7482	1.04481		115723428	60.8232	97.1716	1.5888		115714386	5.34518	0.001	3.72761		115712117	0.187442	0.14416	13.1822		115702423	3.74835	0.001	0.001
115695926	3.88413	0.157417	0.001		115712166	0.085483	0.957882	1.81974		115710182	140.661	108.357	3.67362		115714668	0.110024	3.06095	9.5088		115712861	1.60097	25.6404	110.443		115714455	3.74749	0.693557	0.001
115724622	3.84447	0.001	0.001		115702389	1.83868	23.3367	1.08756		115701324	5.54445	4.37553	0.146347		115705218	2.08289	0.001	3.68935		115701079	0.120987	0.001	8.24907		115722674	39.975	0.001	0.0117203
115702423	3.74835	0.001	0.001		115697489	2.58829	7.8725	54.1754		115716658	18.0591	6.18819	0.475099		115709609	0.167685	0.21273	14.3308		115695851	0.0691973	0.001	4.60758		115722264	3.51999	0.001	0.001
115714455	3.74749	0.693557	0.001		115694862	0.643371	3.17586	13.306		115708949	2.83503	4.51124	0.0777483		115703569	0.980035	0.0214597	0.531094		115710435	0.0372347	0.156457	2.42464		115710100	3.51791	0.780918	0.001
115722674	39.975	0.001	0.0117203		115698709	0.651081	7.52666	13.3209		115717037	2.14594	1.35875	0.0613073		115702709	1066.91	0.263915	4.83325		115698586	0.439045	0.854212	28.9375		115701253	3.50718	0.001	0.001
115722264	3.51999	0.001	0.001		115716771	1.03429	15.5857	20.103		115709849	140.41	44.8569	4.01767		115710041	0.656429	0.001	0.980978		115712737	0.870444	45.4775	56.7483		115719465	3.32075	0.001	0.001
115710100	3.51791	0.780918	0.001		115721161	0.138861	3.81907	2.65285		115699971	28.6432	668.835	17.4803		115702436	0.622817	0.001	0.990043		115706997	0.0340003	0.001	2.14452		115704341	3.26478	0.001	0.001
115701253	3.50718	0.001	0.001		115696206	53.306	844.192	42.0735		115700488	41.4036	7.243	1.21054		115709869	0.095323	0.001	8.03846		115707913	14.2298	18.0819	921.768		115711687	3.23826	1.00816	0.001
115719465	3.32075	0.001	0.001		115724630	0.120844	0.350243	2.22797		115703566	8.41707	5.73474	0.250592		115708966	0.60078	0.001	1.18774		115724459	1.21326	10.459	78.157		115725761	3.22412	0.0461747	0.001
115704341	3.26478	0.001	0.001		115701567	0.202361	4.0692	3.72376		115716101	4.51515	119.741	3.22463		115709300	0.492265	1.0102	40.4316		115718857	0.001	0.0295553	0.901939		115714613	3.2229	1.31303	0.001
115711687	3.23826	1.00816	0.001		115721940	0.195165	5.25049	3.57643		115716550	31.8264	3.95654	0.958217		115696872	452.893	0.275264	2.15844		115721385	0.33225	0.181107	20.9214		115712602	26.5202	0.256398	0.00929733
115725761	3.22412	0.0461747	0.001		115702980	0.041887	0.187926	0.750974		115708987	0.574406	8.98788	0.243617		115721259	2.35952	0.001	3.40497		115703834	0.231983	0.897983	14.2973		115725549	3.19607	0.682921	0.001
115714613	3.2229	1.31303	0.001		115699693	0.33198	1.90283	6.04652		115717033	0.032855	22.8464	0.618348		115698657	0.0908873	1.22047	7.32384		115705977	0.355887	2.38526	21.8006		115700917	177.467	0.001	0.0566753
115712602	26.5202	0.256398	0.00929733		115703031	1.62343	7.40252	29.4194		115704828	2.27718	50.0594	1.44964		115715792	0.512517	0.001	3.53554		115721204	0.339015	24.6065	20.7463		115702442	3.16987	0.001	0.001
115725549	3.19607	0.682921	0.001		115722778	27.6326	97.5691	2.13336		115713874	0.143777	7.52746	0.223276		115708820	0.08788	0.722231	7.03194		115710215	0.08832	0.001	5.26035		115720519	3.11937	0.0399833	0.001
115700917	177.467	0.001	0.0566753		115724727	0.0883037	1.6392	0.0150327		115712053	7.84688	5.36112	0.247714		115710109	0.45898	0.001	1.09032		115725741	0.242722	3.68064	14.4609		115722321	53.9395	0.851936	0.0191083
115702442	3.16987	0.001	0.001		115718806	7.76316	17.1717	0.608096		115704681	3.80439	12.1875	0.369498		115724578	2.45259	0.001	3.22964		115698934	0.148722	2.17038	8.83772		115725574	2.96947	0.001	0.001
115720519	3.11937	0.0399833	0.001		115697975	1.12921	13.5162	0.69902		115714592	389.281	89.7472	12.2484		115697363	0.034599	0.001	2.71984		115722063	0.889535	1.3611	52.9278		115716002	2.95673	0.001	0.001
115722321	53.9395	0.851936	0.0191083		115722945	15.5203	42.3689	1.21732		115712494	12.2088	4.59767	0.390108		115694826	0.196692	1.63413	15.7768		115719239	0.095611	0.001	5.57005		115715896	2.9302	0.039639	0.001
115725574	2.96947	0.001	0.001		115705586	50.9999	132.359	3.99843		115707033	11.3962	22.0342	0.366544		115718511	0.231535	0.514933	18.3318		115697119	0.0797067	0.793657	4.60597		115695930	2.87719	0.001	0.001
115716002	2.95673	0.001	0.001		115703023	1.16651	4.89506	19.8596		115723320	11.7433	2.14089	0.378984		115714009	1.68758	0.0411713	1.9581		115697023	0.372933	0.001	21.7226		115714637	2.86911	0.001	0.001
115715896	2.9302	0.039639	0.001		115717243	237.179	510.533	18.7054		115698645	3.73708	3.44625	0.122052		115717470	3.82526	0.001	3.06117		115715297	0.10606	3.42141	6.03109		115699830	2.84169	0.119877	0.001
115715003	12.7062	0.001	9.29906		115706129	2.64336	8.72086	0.210116		115725718	1.84985	7.63103	0.24439		115709587	0.413653	0.001	0.851055		115716715	0.145642	0.0699793	8.20879		115710321	2.83386	0.001	0.001
115695930	2.87719	0.001	0.001		115701322	2.26286	47.6181	37.956		115712923	126.143	15.6682	4.10127		115725205	0.036424	1.13439	2.79328		115719811	0.0789377	0.0985293	4.37465		115697959	2.82726	0.001	0.001
115714637	2.86911	0.001	0.001		115714792	3.03275	9.52915	50.7562		115707844	20.2372	7.00491	0.661755		115708910	0.187746	0.001	14.6255		115703559	0.459594	0.110612	25.466		115717219	2.77081	0.001	0.001
115699830	2.84169	0.119877	0.001		115715712	0.199195	8.18595	0.427877		115697716	12.0796	3.35497	0.406518		115701267	3.32562	0.001	2.98449		115697811	1.26395	27.2363	68.6603		115724716	2.74295	0.001	0.001
115710321	2.83386	0.001	0.001		115700236	1.21569	4.55363	0.097968		115695883	120.397	20.5495	4.04678		115722029	87.9798	0.04379	0.512842		115713059	2.33635	45.0555	126.902		115704743	2.73413	0.001	0.001
115697959	2.82726	0.001	0.001		115717105	3.35544	80.5681	54.4639		115708694	4.81537	0.943746	0.165222		115714376	0.242933	0.350469	18.8166		115709434	1.61702	0.293126	87.4988		115719336	311.307	0.329146	0.11787
115717219	2.77081	0.001	0.001		115715920	3.4605	7.5991	0.282116		115695780	5.76653	2.85968	0.199609		115696963	0.141914	0.001	10.9412		115708894	0.723003	0.130546	38.9494		115697754	2.64485	0.001	0.001
115724593	4.67604	0.001	8.80798		115697513	5.78615	18.0569	90.6771		115722837	131.737	32.7332	4.54302		115697760	0.102676	0.001	7.5262		115714155	0.971339	58.2687	51.0738		115712417	2.64398	0.96676	0.001
115724716	2.74295	0.001	0.001		115698045	3.45259	7.30446	0.282477		115718963	33.4063	7.18454	1.15623		115711491	1.39678	35.1562	102.177		115721966	0.49668	0.001	25.9524		115705745	2.63505	0.001	0.001
115704743	2.73413	0.001	0.001		115722405	2.64133	8.64232	0.216344		115725166	4.97501	6.91326	0.174129		115710978	4.17121	0.001	2.89505		115721687	0.440449	1.28646	22.8299		115697762	43.9097	0.043482	0.0176917
115719336	311.307	0.329146	0.11787		115722669	0.270689	9.72305	4.01693		115715979	38.3575	5.58096	1.34153		115709296	507.45	0.166513	2.98397		115715918	0.470769	1.36473	24.364		115716578	2.60057	0.178966	0.001
115697754	2.64485	0.001	0.001		115702763	4.76152	23.4881	1.26792		115718837	1.32355	27.8331	0.945879		115719672	199.807	0.081414	1.17726		115712455	0.370429	16.4554	19.0926		115704428	2.55841	0.001	0.001
115705745	2.63505	0.001	0.001		115711548	2.96597	24.0933	43.7677		115700274	4.7383	1.97583	0.167699		115708111	0.279435	0.001	20.0172		115713612	0.310855	0.29976	15.6279		115714813	2.54273	0.034817	0.001
115697762	43.9097	0.043482	0.0176917		115699224	4.67215	11.8044	0.387951		115698497	10.9276	2.69766	0.39199		115706088	1.65525	0.001	2.87761		115704419	0.0443193	0.0792277	2.10245		115722957	2.54011	0.001	0.001
115716578	2.60057	0.178966	0.001		115708267	11.4168	162.384	9.02412		115718049	24.0691	4.79685	0.870679		115697576	97.2354	0.001	0.573853		115725594	0.59864	1.784	27.1258		115721876	2.49376	0.001	0.001
115704428	2.55841	0.001	0.001		115710133	0.200422	4.03403	2.91865		115719620	12.6501	8.90314	0.460184		115707794	0.339815	0.001	0.724254		115725163	0.85908	25.8966	38.9019		115703665	2.48807	0.0387033	0.001
115714813	2.54273	0.034817	0.001		115721366	0.80173	3.62162	11.4656		115703790	4.97246	3.02383	0.181639		115716024	3.56553	32.7298	252.144		115715215	0.109957	0.516759	4.73063		115705016	2.48797	0.056758	0.001
115722957	2.54011	0.001	0.001		115715626	0.418052	1.02345	5.94557		115715333	30.6806	3.45146	1.11829		115696830	0.064448	1.23064	4.4883		115703623	0.256278	4.39888	10.9965		115708787	2.44988	0.0442903	0.001
115721876	2.49376	0.001	0.001		115711229	36.3499	225.763	513.418		115717308	18.5981	9.53681	0.679169		115712117	0.187442	0.14416	13.1822		115721983	3.70724	16.744	158.166		115725388	55.0604	0.0181433	0.0235777
115703665	2.48807	0.0387033	0.001		115696214	3.92042	16.8721	0.945169		115701069	8.11448	1.45731	0.299716		115712861	1.60097	25.6404	110.443		115707634	0.0434007	0.0720637	1.80308		115708355	2.43645	1.00669	0.001
115705016	2.48797	0.056758	0.001		115706500	3.4355	8.10747	0.296597		115704622	3.29687	2.70322	0.122984		115704660	1.46982	0.040322	0.809706		115695753	0.03279	0.001	1.38584		115722956	22.9733	0.001	0.010576
115708787	2.44988	0.0442903	0.001		115711183	5.89668	65.7841	3.83681		115706808	47.2742	20.8854	1.78357		115712883	3.09765	0.001	2.75517		115716831	0.0971417	0.001	1.24278		115714807	2.38032	0.034817	0.001
115725388	55.0604	0.0181433	0.0235777		115706424	58.2829	120.218	5.0795		115701093	48.3091	16.0216	1.84359		115701079	0.120987	0.001	8.24907		115719146	0.211588	0.15031	8.82368		115707560	2.32627	0.001	0.001
115708355	2.43645	1.00669	0.001		115717628	4.74104	32.3885	65.114		115711908	0.954541	8.62488	0.305131		115695851	0.0691973	0.001	4.60758		115704689	0.059091	0.001	1.16222		115712311	233.419	0.001	0.101419
115722956	22.9733	0.001	0.010576		115705896	0.282311	1.30907	3.79212		115725739	3.72977	56.1126	2.01319		115710435	0.0372347	0.156457	2.42464		115723464	1.78035	1.73564	74.1707		115715947	2.32053	0.001	0.001
115714807	2.38032	0.034817	0.001		115708854	1.9194	14.0142	25.6458		115714005	13.8665	14.1068	0.540524		115698586	0.439045	0.854212	28.9375		115695961	0.179124	0.001	7.36849		115706756	2.31481	0.0591027	0.001
115707560	2.32627	0.001	0.001		115711648	5.68651	63.3717	3.71576		115713036	10.7593	6.51031	0.421529		115706997	0.0340003	0.001	2.14452		115722108	0.658811	1.03976	26.8797		115695527	2.29307	0.001	0.001
115712311	233.419	0.001	0.101419		115703531	2.73194	23.4947	1.37843		115701300	17.1205	22.0935	0.672485		115723558	2.22037	0.001	2.66945		115721291	0.60765	2.5407	24.6457		115707431	2.28636	0.001	0.001
115715947	2.32053	0.001	0.001		115711669	0.678437	1.77011	8.99918		115712096	12.57	21.8789	0.494195		115707913	14.2298	18.0819	921.768		115711416	0.293915	3.19828	11.7315		115711953	17.4021	0.001	0.00865767
115706756	2.31481	0.0591027	0.001		115707210	0.114224	9.89678	1.50244		115714202	35.3292	8.38082	1.39626		115712504	0.23104	0.001	0.770952		115720979	0.84372	0.277701	33.6205		115712950	2.23251	0.001	0.001
115695527	2.29307	0.001	0.001		115708264	1.69747	8.62672	21.9622		115701793	16.5769	14.8767	0.665882		115711100	1.46947	0.042098	0.891409		115697170	0.226895	0.0702487	9.01148		115709775	2.18647	0.001	0.001
115707431	2.28636	0.001	0.001		115713057	0.207479	1.96377	2.67183		115697500	7.12066	6.65475	0.289317		115717999	1.68383	0.0482337	0.934829		115717033	0.032855	22.8464	0.618348		115721896	159.766	0.001	0.075125
115711953	17.4021	0.001	0.00865767		115707366	4.36258	9.5541	0.395026		115716320	3.15396	2.11386	0.129536		115724459	1.21326	10.459	78.157		115719812	0.057292	0.001	2.24512		115722367	2.13125	0.001	0.001
115712950	2.23251	0.001	0.001		115714581	0.970369	47.6866	12.1932		115710511	3.2021	0.634593	0.131608		115698079	2.77445	0.001	2.6023		115723385	1.27126	19.8429	49.9225		115696909	2.12237	0.001	0.001
115709775	2.18647	0.001	0.001		115708157	4.79503	62.3843	3.7371		115706025	6.96548	2.98296	0.29055		115721780	0.228032	0.001	0.73966		115712188	0.069168	0.112351	2.67111		115722402	53.8826	0.789395	0.0265433
115721896	159.766	0.001	0.075125		115695891	4.62497	30.0628	56.3871		115695971	0.533728	2.47675	0.092248		115718857	0.001	0.0295553	0.901939		115720851	0.0866527	0.066717	3.35075		115699225	2.08265	0.001	0.001
115722367	2.13125	0.001	0.001		115721783	1.69854	17.0254	20.6491		115701247	305.441	614.153	13.1271		115721385	0.33225	0.181107	20.9214		115701076	0.905839	2.67392	34.6669		115711394	2.06384	0.001	0.001
115696909	2.12237	0.001	0.001		115718652	3.46265	9.68804	42.0968		115709061	102.171	76.1628	4.45567		115703834	0.231983	0.897983	14.2973		115712115	0.121556	0.060399	4.61821		115705062	44.1627	0.0595843	0.0225473
115722402	53.8826	0.789395	0.0265433		115714527	5185.9	11838.3	483.639		115700504	29.7632	7.42348	1.30036		115700827	46.9863	0.033222	0.357411		115694734	0.374825	0.001	14.1307		115701144	2.03007	0.227575	0.001
115699225	2.08265	0.001	0.001		115714839	32.2584	67.0388	3.02402		115708163	4.87933	19.9295	0.21473		115705977	0.355887	2.38526	21.8006		115707640	0.112343	0.001	4.1171		115710334	2.01641	0.268435	0.001
115711394	2.06384	0.001	0.001		115722337	1.86287	9.16614	22.0986		115700867	81.4283	1151.22	43.0649		115710215	0.08832	0.001	5.26035		115715847	0.108265	0.601002	3.91349		115695382	1.98185	0.001	0.001
115705062	44.1627	0.0595843	0.0225473		115716855	0.923065	3.31746	10.943		115716463	4.09247	1.44081	0.181441		115715986	2.77817	0.001	2.2703		115717427	0.893234	0.139207	32.3962		115700792	1.96108	0.001	0.001
115716605	4.26563	0.001	2.52494		115706441	0.935696	4.157	11.0767		115700730	35.6397	20.2342	1.59951		115725741	0.242722	3.68064	14.4609		115698881	0.11588	0.380438	4.14983		115724685	1.94553	0.001	0.001
115701144	2.03007	0.227575	0.001		115720531	0.709419	7.1148	8.38917		115708026	11.034	12.9498	0.503999		115707554	725.214	0.40165	5.82964		115697113	1.06405	1.24827	38.2418		115712570	1.88502	0.001	0.001
115710334	2.01641	0.268435	0.001		115720788	2.05295	27.6426	24.2521		115714006	6.25673	7.27635	0.286899		115698934	0.148722	2.17038	8.83772		115723037	0.258177	0.219066	9.13483		115701584	1.86535	0.16789	0.001
115695382	1.98185	0.001	0.001		115712362	1.691	12.0667	19.9138		115717353	24.8704	13.5721	1.14674		115722063	0.889535	1.3611	52.9278		115725180	1.58856	0.0821273	55.9287		115698225	2.75885	0.001	0.00250133
115704652	0.51414	0.0346093	111.189		115719095	0.855666	7.09787	9.96363		115714607	4.63307	3.35262	0.21714		115719239	0.095611	0.001	5.57005		115721415	0.103015	0.001	3.57768		115720931	1.771	0.001	0.001
115700792	1.96108	0.001	0.001		115698914	0.377905	2.49651	0.163952		115703954	4.1285	14.8655	0.194857		115697119	0.0797067	0.793657	4.60597		115708902	0.345214	0.035775	12.0049		115710408	1.70008	1.15885	0.001
115710473	4.55915	0.001	7.08138		115701058	4.6716	11.3614	0.467968		115723004	1.09553	29.3569	1.11969		115723269	1.38226	0.001	2.19543		115696908	1.0581	0.281323	36.6158		115718168	1.23731	0.013575	0.001
115724685	1.94553	0.001	0.001		115711601	39.7449	102.787	3.97924		115724640	19.3248	5.59044	0.918075		115697023	0.372933	0.001	21.7226		115698217	2.41719	0.61623	83.202		115711605	1.69032	0.001	0.001
115712570	1.88502	0.001	0.001		115713090	0.323054	2.9644	3.48093		115720594	6.04613	7.86598	0.290974		115724176	0.667183	0.0230317	1.71987		115702379	0.701606	1.15445	23.5934		115704294	47.8938	0.152661	0.0300603
115701584	1.86535	0.16789	0.001		115707549	22.9304	235.257	15.7559		115705239	10.3432	3.27391	0.499037		115697232	213.771	0.329247	2.12516		115725573	0.061409	0.001	2.02954		115715779	1.62553	0.001	0.001
115698225	2.75885	0.001	0.00250133		115702425	2.53738	11.2185	0.256518		115711929	188.484	21.4669	9.23219		115716715	0.145642	0.0699793	8.20879		115698260	0.0616583	0.242498	2.00805		115699020	24.4223	0.001	0.0161123
115720931	1.771	0.001	0.001		115719513	36.0862	252.933	388.712		115698030	84.8947	31.9344	4.21999		115719811	0.0789377	0.0985293	4.37465		115698558	0.348661	0.645088	11.4314		115719008	343.415	0.001	0.218787
115712106	7.00396	0.001	7.03463		115705581	82.4429	181.442	8.35615		115698103	1.25138	14.5281	0.565198		115710276	1.33226	0.001	2.0916		115701228	0.371183	0.55338	12.1302		115711257	1.56099	0.033199	0.001
115718168	1.23731	0.013575	0.001		115724160	0.697704	2.74728	7.49268		115712828	327.968	152.225	17.0313		115703559	0.459594	0.110612	25.466		115720683	0.156566	0.158923	5.02856		115696476	0.929018	0.0106217	0.001
115711605	1.69032	0.001	0.001		115719423	0.595295	1.37075	6.27728		115698764	1.38429	0.370864	0.0733867		115698900	1.51074	0.052311	1.04526		115710057	0.197614	0.0782533	6.29965		115723347	440.98	0.389887	0.294544
115704294	47.8938	0.152661	0.0300603		115723046	0.526106	17.7104	1.18717		115705559	0.121772	4.00963	0.15948		115704667	213.193	0.001	2.16443		115702488	0.001	0.081243	1.16028		115709751	75.0012	0.0532527	0.051038
115715779	1.62553	0.001	0.001		115715647	0.826575	2.68858	8.60133		115716827	3.62195	88.3522	3.50396		115706400	3.52033	0.001	2.02131		115696542	0.106683	0.187437	3.36156		115703182	96.6877	0.0709747	0.066663
115699020	24.4223	0.001	0.0161123		115705222	19.9603	790.452	206.224		115704880	60.7459	32.1388	3.23315		115700595	94.874	0.447358	1.01206		115719431	5.69676	61.0268	180.482		115700968	15.508	0.049649	0.0115793
115719008	343.415	0.001	0.218787		115698664	4.86265	50.5635	3.41024		115722960	28.8561	41.8082	1.54059		115697811	1.26395	27.2363	68.6603		115724555	0.137214	0.0350677	4.29089		115723232	1.08849	0.0127393	0.083318
115711257	1.56099	0.033199	0.001		115697175	0.839677	2.55066	8.59577		115708136	18.1816	19.1734	0.971641		115713059	2.33635	45.0555	126.902		115699453	4.10966	0.001	127.525		115724675	1.46485	0.001	0.001
115696476	0.929018	0.0106217	0.001		115701485	0.989238	4.04277	10.1124		115712262	8.12744	115.274	4.70224		115709434	1.61702	0.293126	87.4988		115706501	18.9679	2.28247	588.435		115720771	1.44916	0.001	0.001
115723347	440.98	0.389887	0.294544		115698935	1.35506	10.3991	0.707914		115694739	9.41567	2.7302	0.507596		115708894	0.723003	0.130546	38.9494		115721187	0.983271	0.829913	30.2999		115725729	19.9229	0.0988057	0.01504
115709751	75.0012	0.0532527	0.051038		115715226	0.701423	5.62091	7.10806		115712372	2.85267	3.87304	0.155228		115707161	3.7226	0.001	1.92781		115707268	0.26837	0.0663337	8.20991		115697695	348.114	0.001	0.249716
115703182	96.6877	0.0709747	0.066663		115725440	14.0734	49.9262	142.618		115698773	15.292	38.2771	0.829616		115699384	77.1131	0.001	0.837137		115697190	0.0446007	3.74869	1.33791		115705684	106.173	0.190896	0.078644
115700968	15.508	0.049649	0.0115793		115722123	368.136	2247.58	3729.08		115709566	90.667	34.5881	4.92549		115703792	258.799	0.001	2.89411		115710343	0.281287	0.001	8.54841		115718392	98.9264	0.001	0.0787943
115724096	1.08755	0.0127067	0.212821		115721865	7.47007	19.9502	0.784899		115715183	35.5396	9.37684	1.94247		115712063	2.92353	0.001	1.91959		115719147	0.224598	0.055925	6.75365		115708921	170.608	0.001	0.13955
115708167	0.608077	0.001	123.165		115722699	3.53951	33.1022	35.0781		115725060	217.422	543.807	11.9045		115721966	0.49668	0.001	25.9524		115714235	2.23914	16.8478	67.55		115719614	132.926	5.34401	0.113147
115723232	1.08849	0.0127393	0.083318		115707030	7.39866	59.4098	4.11639		115698573	12.5774	8.69344	0.69057		115698887	1.83571	0.066743	1.42956		115699728	0.782039	6.60687	23.2418		115708255	13.4674	0.09033	0.012546
115702398	3.62983	0.001	3.98592		115723422	30.4358	123.945	3.21809		115720837	1.54605	34.0306	1.40225		115695648	4.57249	0.168527	1.35584		115706951	0.090801	0.001	2.65718		115712431	10.908	0.001	0.010403
115702668	5.5126	0.001	6.18849		115716446	2.34726	16.3556	22.6153		115712850	60.0704	55.0339	3.36951		115710159	2.4711	0.001	1.89385		115708151	0.327088	1.3559	9.60465		115696267	7.96295	0.0999433	0.007898
115724675	1.46485	0.001	0.001		115715013	6.52186	21.506	62.0351		115711302	8.90498	171.785	7.19384		115721687	0.440449	1.28646	22.8299		115711961	0.290829	0.837691	8.51856		115716935	1.23832	0.277492	0.001
115720771	1.44916	0.001	0.001		115707498	7.8183	16.1057	0.845225		115714610	4.94767	2.55339	0.279688		115714311	2.03961	0.001	1.84461		115718565	0.103754	0.001	3.01505		115712087	102.318	0.001	0.104629
115725729	19.9229	0.0988057	0.01504		115697584	5.3862	138.583	9.81075		115724416	14.4069	133.575	5.62797		115717186	37.514	0.001	0.470048		115707813	2.19424	0.0587473	64.1516		115703246	23.2116	2.57526	0.024672
115697695	348.114	0.001	0.249716		115711912	11.1357	61.0278	4.36655		115712274	3.9755	2.05015	0.23139		115706696	3.62593	0.001	1.84053		115707831	0.224346	0.032335	6.53032		115712261	26.6342	0.247665	0.029919
115705684	106.173	0.190896	0.078644		115714735	1.79346	4.12113	16.9176		115725626	6.33741	2.57386	0.368444		115704907	1.31538	0.001	1.82316		115716003	0.124442	2.57259	3.58113		115709440	795.949	0.001	0.876697
115718392	98.9264	0.001	0.0787943		115712493	6.75344	41.0813	0.748553		115718599	63.0035	238.772	3.68506		115708791	857.382	0.001	11.6351		115700912	0.473873	7.57992	13.5358		115698170	2121.81	0.229228	2.54645
115708921	170.608	0.001	0.13955		115723013	3.65423	14.3217	34.1776		115698263	0.250412	11.2317	0.477841		115715918	0.470769	1.36473	24.364		115725207	0.858579	0.203552	24.19		115697697	18.587	0.103806	0.0243597
115719614	132.926	5.34401	0.113147		115696836	2.79431	18.7232	25.882		115716971	2896.01	7825.35	173.229		115710150	751.264	1.02055	11.0858		115703199	2.26186	0.132897	63.5118		115725506	50.2922	0.001	0.0652947
115708255	13.4674	0.09033	0.012546		115700594	0.370055	1.08043	3.36379		115697853	291.893	132.721	17.819		115716742	3.72353	0.012971	0.0599027		115723398	0.0755843	0.22296	2.08724		115694843	153.751	0.001	0.214626
115712431	10.908	0.001	0.010403		115705863	0.487129	2.84634	4.42984		115721731	3.11827	66.1002	2.83464		115709841	13.8454	0.0416403	0.222567		115724185	3.77915	90.7343	105.293		115715733	19.208	0.391425	0.0279683
115696267	7.96295	0.0999433	0.007898		115697135	3.01397	8.02352	27.3961		115695882	70.7896	13.1045	4.38042		115712050	2.48367	0.001	1.79365		115697503	6.35658	130.967	176.53		115704690	28.9893	0.001	0.0418943
115716935	1.23832	0.277492	0.001		115698165	2.89775	10.8516	26.0864		115701795	1.64312	8.99876	0.39059		115706985	9.57387	0.001	0.177878		115715648	0.643723	0.001	17.798		115716735	15.09	0.385672	0.022346
115705892	0.626472	0.001	90.0185		115701311	13.8137	104.502	7.6151		115701582	6.41748	2.40216	0.398542		115713612	0.310855	0.29976	15.6279		115698574	0.814121	0.91763	22.12		115704500	122.362	3.27512	0.178266
115712087	102.318	0.001	0.104629		115725738	0.099682	1.23227	0.090812		115714351	11.7888	16.4157	0.738871		115704760	0.67534	0.0300667	0.938517		115722181	3.69407	0.001	99.9333		115702478	6.46192	0.001	0.0106447
115703246	23.2116	2.57526	0.024672		115703202	215.32	467.433	24.3602		115705036	3.67689	11.3831	0.235003		115704419	0.0443193	0.0792277	2.10245		115717016	29.2845	1035.64	787.387		115715277	6.67809	0.433452	0.010988
115712261	26.6342	0.247665	0.029919		115716853	1.84233	8.83185	16.4624		115722411	53.9348	25.4016	3.43959		115722234	4.34355	0.047475	1.72826		115714912	2.40029	26.3291	63.9927		115716167	36.6377	0.012115	0.0558983
115709440	795.949	0.001	0.876697		115712620	17.0409	73.3542	152.297		115706443	1.94648	5.05249	0.125786		115724992	3.12067	0.001	1.72572		115714130	0.100889	0.182174	2.62775		115699148	11.3536	0.065809	0.0181827
115698170	2121.81	0.229228	2.54645		115700934	6.55576	18.8371	58.1491		115705362	405.066	65.5559	26.1535		115725594	0.59864	1.784	27.1258		115711137	0.137826	0.0656173	3.58045		115707574	416.65	1.49343	0.655102
115697697	18.587	0.103806	0.0243597		115695900	0.417956	11.7475	0.87063		115721954	19.9724	3.88781	1.29194		115704372	2.51931	0.0289943	1.33501		115697531	2.4269	11.6901	63.3702		115714857	4.56521	0.0227627	0.008189
115725506	50.2922	0.001	0.0652947		115714959	1.26112	12.0437	11.0079		115716283	1.01938	8.88153	0.387576		115715215	0.109957	0.516759	4.73063		115719438	1.80663	0.296112	46.9668		115698060	2.55408	0.001	0.00514933
115694843	153.751	0.001	0.214626		115707439	0.112287	14.9105	1.1196		115722431	0.569576	1.75111	0.0780643		115710106	2.85306	0.001	1.53786		115696705	0.073366	0.001	1.88005		115721313	53.074	0.866906	0.0879617
115715733	19.208	0.391425	0.0279683		115704867	0.108972	0.790975	0.938417		115714880	0.176847	3.80641	0.001		115703623	0.256278	4.39888	10.9965		115717986	0.30267	0.001	7.76558		115713117	5.22079	0.726559	0.009639
115704690	28.9893	0.001	0.0418943		115700756	6.02027	68.7005	5.1883		115719357	45.9299	6.26749	3.06231		115712132	1.25099	0.001	1.52326		115725556	0.675856	1.24714	17.3442		115709442	48.0821	0.001	0.0824573
115716735	15.09	0.385672	0.022346		115721804	0.498625	4.80068	4.31897		115712147	11.0549	8.48706	0.742693		115697767	1.32979	0.001	1.47271		115711554	0.639793	2.75608	16.3874		115713254	13.5496	1.30434	0.0243123
115704500	122.362	3.27512	0.178266		115725181	13.5152	32.2322	117.104		115697527	3.3739	0.697748	0.22737		115721983	3.70724	16.744	158.166		115698672	0.103074	0.080155	2.57305		115707141	19.2674	0.345253	0.0345633
115702478	6.46192	0.001	0.0106447		115716854	0.183429	1.02166	1.56495		115707816	13.8861	3.40766	0.93508		115725598	0.684212	0.001	1.4421		115709972	1.3816	0.688399	34.5923		115720789	103.038	0.001	0.180532
115715277	6.67809	0.433452	0.010988		115720793	3.10315	7.22051	26.462		115695556	0.039984	1.83798	0.0847293		115707634	0.0434007	0.0720637	1.80308		115711472	0.594434	30.0344	14.7737		115719710	7.38678	0.001	0.0138693
115716167	36.6377	0.012115	0.0558983		115698882	0.877736	5.76919	0.444173		115711472	0.594434	30.0344	14.7737		115695753	0.03279	0.001	1.38584		115718454	4.06523	1.95448	99.7062		115725633	21.1248	1.88209	0.0379303
115699148	11.3536	0.065809	0.0181827		115698309	527.765	1152.06	61.6767		115698725	38.8566	6.03714	2.65749		115715758	1.32964	0.0657897	1.7008		115713728	1.02143	2.44397	25.0112		115715587	8.25529	0.295269	0.015563
115707574	416.65	1.49343	0.655102		115698176	0.309367	2.32914	2.60486		115723210	8.19637	3.45957	0.566392		115724170	1514.08	3.37549	34.2096		115700429	0.515898	8.24314	12.5839		115709853	512.813	0.001	0.945908
115714857	4.56521	0.0227627	0.008189		115715667	0.965703	11.5086	8.12676		115716632	10.9173	24.6974	0.756077		115716590	97.5313	0.130393	2.23186		115697794	0.207681	0.173145	5.0225		115719346	6.45951	0.012034	0.0130987
115698060	2.55408	0.001	0.00514933		115725330	939.888	2222.97	112.573		115700519	24.0998	5.87252	1.66819		115716831	0.0971417	0.001	1.24278		115713214	1.35082	8.44366	32.6846		115724732	5.40528	0.001	0.0112623
115721313	53.074	0.866906	0.0879617		115702395	14.8373	33.2023	1.78244		115722323	7.56086	10.4567	0.527766		115719146	0.211588	0.15031	8.82368		115724614	5.00194	29.6047	119.729		115708243	259.399	25.9511	0.498475
115713117	5.22079	0.726559	0.009639		115699708	6.4875	64.324	5.05646		115723044	1.08944	22.7482	1.04481		115704689	0.059091	0.001	1.16222		115722429	0.066174	0.001	1.55701		115718458	5.89512	1.75169	0.0125353
115709442	48.0821	0.001	0.0824573		115698628	0.950697	13.0603	7.84599		115723352	76.0877	33.5083	5.3643		115723464	1.78035	1.73564	74.1707		115707946	0.136745	0.001	3.15154		115716157	0.505222	3.4738	0.001
115713254	13.5496	1.30434	0.0243123		115717728	0.151503	1.20082	0.09636		115719355	60.5221	11.3245	4.27062		115695961	0.179124	0.001	7.36849		115698891	1.67445	0.577912	38.121		115712149	7.44123	0.001	0.0158463
115707141	19.2674	0.345253	0.0345633		115705313	52.4667	276.412	431.421		115721014	1.37949	0.939477	0.098287		115710127	40.1333	0.252721	0.94965		115700299	0.343752	0.578951	7.74746		115699017	1.52222	0.219989	0.001
115720789	103.038	0.001	0.180532		115723500	0.05488	0.556342	1.68897		115724785	7.20871	2.85103	0.515978		115720084	80.0984	0.0182163	1.90353		115718515	0.151785	0.0368657	3.37536		115715995	8.94227	0.631446	0.019071
115719710	7.38678	0.001	0.0138693		115716934	3.8824	50.3331	4.07046		115702389	1.83868	23.3367	1.08756		115716543	52.8737	0.001	1.25957		115701243	0.974308	6.17235	21.4917		115714542	19.8792	0.0972163	0.041605
115725633	21.1248	1.88209	0.0379303		115717483	1.05859	8.77366	8.64451		115719458	9.46896	9.58568	0.68157		115722108	0.658811	1.03976	26.8797		115719499	0.487483	0.225305	10.677		115701449	41.1393	4.05511	0.0856097
115698064	9.18353	0.001	5.20196		115723219	0.778265	102.985	6.34899		115714465	29.8557	31.0042	2.15048		115721291	0.60765	2.5407	24.6457		115712640	0.215058	0.07675	4.68608		115717268	4.82294	0.446033	0.0109887
115715587	8.25529	0.295269	0.015563		115721754	1.45629	7.5484	11.8789		115714770	3.40621	2.11345	0.250878		115716756	297.355	0.001	7.12337		115705890	0.592999	0.001	12.8626		115723249	4.14604	0.259173	0.00958733
115709853	512.813	0.001	0.945908		115718716	0.197141	1.97616	0.817785		115696206	53.306	844.192	42.0735		115711416	0.293915	3.19828	11.7315		115715760	0.220585	0.0591213	4.76847		115701195	69.5507	0.001	0.14777
115719346	6.45951	0.012034	0.0130987		115704803	0.0982057	5.6463	0.787496		115724789	13.1918	5.82078	0.978399		115718558	25.6339	0.001	0.634571		115704625	0.62948	0.287951	13.5999		115704942	11.744	5.66758	0.0259613
115724732	5.40528	0.001	0.0112623		115719612	119.406	258.078	14.9619		115715775	8.51583	8.87695	0.638017		115711044	70.911	0.538402	1.78009		115725199	0.159859	0.001	3.42811		115721408	26.2378	1.59718	0.0572777
115708243	259.399	25.9511	0.498475		115702049	2.46811	7.05078	19.9041		115704044	71.7318	86.1091	5.47738		115706178	134.304	0.58862	3.39583		115712166	0.085483	0.957882	1.81974		115702653	11.7561	1.01312	0.0263073
115718458	5.89512	1.75169	0.0125353		115725612	7.21337	65.5712	58.057		115722214	4.74193	5.40668	0.36377		115708926	1.6715	0.001	0.0439323		115706953	0.37183	0.637976	7.93501		115698017	6.4626	0.0435387	0.0149837
115712149	7.44123	0.001	0.0158463		115717049	0.335586	2.46985	2.67827		115722778	27.6326	97.5691	2.13336		115710128	45.3113	0.383567	1.16592		115710308	0.296899	0.001	6.30613		115697886	5.67083	0.001	0.013328
115699017	1.52222	0.219989	0.001		115714331	7.29469	37.1768	58.3356		115724727	0.0883037	1.6392	0.0150327		115700268	0.848512	0.001	0.728971		115708058	0.785512	1.48173	16.5371		115702385	335.684	56.3074	0.741881
115721874	0.84422	0.0126903	1.39146		115699454	8.41348	62.9303	5.23238		115718806	7.76316	17.1717	0.608096		115714406	13.888	0.001	0.372742		115719364	0.32513	0.074482	6.82877		115714165	13.3231	0.274842	0.0313363
115715995	8.94227	0.631446	0.019071		115702697	7.60224	35.7776	0.957703		115697975	1.12921	13.5162	0.69902		115696958	9.92535	0.001	0.269882		115697489	2.58829	7.8725	54.1754		115720530	35.7564	4.33079	0.0827633
115714542	19.8792	0.0972163	0.041605		115703587	0.512919	3.66493	4.08556		115722945	15.5203	42.3689	1.21732		115705047	0.921259	0.001	0.696215		115706792	0.731607	0.0881817	15.2468		115719821	4.35831	0.063961	0.011101
115701449	41.1393	4.05511	0.0856097		115709481	1.22795	3.9177	9.74512		115705586	50.9999	132.359	3.99843		115719501	257.37	2.52974	7.04944		115720952	1.47484	0.578016	30.7122		115708697	93.9927	5.25431	0.229881
115717268	4.82294	0.446033	0.0109887		115718171	4.30248	20.394	0.550017		115700275	5.13321	3.73053	0.403364		115720979	0.84372	0.277701	33.6205		115694862	0.643371	3.17586	13.306		115712176	2.70197	0.0831937	0.00792433
115723249	4.14604	0.259173	0.00958733		115722556	33.676	115.201	4.35763		115717243	237.179	510.533	18.7054		115718570	2.19015	0.0377113	1.40642		115703608	0.790647	0.351389	16.3364		115714457	113.182	0.789625	0.291546
115701195	69.5507	0.001	0.14777		115717484	0.491645	2.78827	3.86877		115723236	54.3616	66.2536	4.29208		115721814	437.082	4.3516	12.1828		115698849	0.267427	0.05617	5.46947		115723055	3.28966	0.0582617	0.00947167
115704942	11.744	5.66758	0.0259613		115711104	0.310349	0.621106	2.43179		115706129	2.64336	8.72086	0.210116		115716758	7.48275	0.012194	0.210028		115698709	0.651081	7.52666	13.3209		115706528	19.4405	0.0545963	0.0511933
115721408	26.2378	1.59718	0.0572777		115717229	2.61544	9.48317	20.4478		115715087	6.95793	2.22632	0.554791		115697170	0.226895	0.0702487	9.01148		115723039	0.566601	1.5381	11.5898		115718796	16.0462	0.796568	0.043249
115702653	11.7561	1.01312	0.0263073		115707365	0.670852	9.0813	0.0887347		115715712	0.199195	8.18595	0.427877		115719177	11.7937	0.001	0.341531		115705373	0.201446	0.001	4.10276		115705840	44.131	4.68734	0.117788
115698017	6.4626	0.0435387	0.0149837		115712170	0.384318	3.78678	1.41752		115700236	1.21569	4.55363	0.097968		115703186	30.4925	0.0602393	0.885523		115702750	0.406939	0.001	8.18014		115724088	6.74063	0.001	0.01913
115697886	5.67083	0.001	0.013328		115701179	1.6827	10.0722	0.221879		115702977	3.55376	2.15139	0.285394		115713830	0.735226	0.041098	0.769539		115704916	0.228881	0.001	4.56358		115725622	4.61913	0.001	0.013456
115702385	335.684	56.3074	0.741881		115704140	14.8217	31.8737	1.95403		115722895	94.8296	77.808	7.69753		115724062	0.932917	0.0519073	1.74417		115700964	0.500905	0.432616	9.90517		115699323	162.13	0.0973167	0.45684
115714165	13.3231	0.274842	0.0313363		115706511	2.58422	33.2375	20.1312		115715920	3.4605	7.5991	0.282116		115695434	1.15626	0.001	0.60078		115717430	0.209354	0.22185	4.09228		115704143	32.2675	0.165133	0.0927613
115720530	35.7564	4.33079	0.0827633		115698646	17.3175	44.2497	2.29971		115706050	6.68529	3.22993	0.544615		115704567	17.9826	0.001	0.524627		115724964	5.65992	7.80705	111.004		115709850	349.165	0.001	1.01727
115719821	4.35831	0.063961	0.011101		115720196	0.808573	6.44068	6.28004		115704602	63.9497	65.789	5.21241		115714935	2.19698	0.122085	1.01998		115712764	2.54364	1.06703	49.5518		115698901	259.602	0.0212053	0.77752
115718670	1.39597	0.022076	1.16712		115709632	0.97049	11.1885	7.53724		115698045	3.45259	7.30446	0.282477		115699595	52.326	0.001	1.52473		115710216	1.6179	0.085491	31.4727		115701011	0.613509	2.20448	0.0237587
115708697	93.9927	5.25431	0.229881		115698262	3.73298	47.9478	28.9362		115722405	2.64133	8.64232	0.216344		115719217	0.978163	0.001	0.600475		115716771	1.03429	15.5857	20.103		115723515	9.33057	0.597301	0.0292807
115712176	2.70197	0.0831937	0.00792433		115715307	1.76687	89.2271	13.6878		115722669	0.270689	9.72305	4.01693		115718609	0.903913	0.001	0.588372		115717210	6.48085	0.001	124.795		115697828	1594.39	149.418	4.93679
115714457	113.182	0.789625	0.291546		115695708	2.66238	12.5383	20.579		115702763	4.76152	23.4881	1.26792		115713754	27.8407	0.001	0.845348		115721161	0.138861	3.81907	2.65285		115697814	1361.89	123.565	4.25512
115723055	3.28966	0.0582617	0.00947167		115722498	3.86268	8.8067	29.6663		115699224	4.67215	11.8044	0.387951		115710053	0.776159	0.001	0.584312		115700869	0.779405	0.133438	14.8358		115708313	18.7518	0.49872	0.060961
115706528	19.4405	0.0545963	0.0511933		115706270	39.4752	185.109	302.498		115708267	11.4168	162.384	9.02412		115719812	0.057292	0.001	2.24512		115698841	1.91964	0.37416	36.2641		115715839	17.1386	4.12336	0.0563263
115718796	16.0462	0.796568	0.043249		115695990	2.7063	23.513	20.7145		115697592	16.8361	9.91872	1.425		115713375	111.879	1.38137	3.45078		115709049	0.12017	0.0559923	2.25204		115715807	55.3511	15.3414	0.181031
115705840	44.131	4.68734	0.117788		115694770	900.845	1871.37	120.887		115700738	46.8908	35.3532	3.96734		115722765	18.7211	0.001	0.588614		115724630	0.120844	0.350243	2.22797		115725002	49.4019	0.955052	0.162184
115724088	6.74063	0.001	0.01913		115701284	4.70041	17.8115	35.9522		115696214	3.92042	16.8721	0.945169		115703644	0.832182	0.001	0.570732		115708679	1.31858	0.206278	24.4285		115710205	24.4566	0.001	0.0808713
115725622	4.61913	0.001	0.013456		115708900	0.713605	2.52231	5.45095		115720575	83.8415	58.1933	7.18694		115715891	0.746746	0.0447073	0.327092		115701567	0.202361	4.0692	3.72376		115697724	92.2282	10.2273	0.303054
115699323	162.13	0.0973167	0.45684		115699312	18.8686	262.402	22.7782		115706500	3.4355	8.10747	0.296597		115719502	255.813	1.71743	8.18737		115720877	0.10799	0.0257053	1.97533		115723346	1184.78	3.40013	3.96457
115704143	32.2675	0.165133	0.0927613		115701000	3.70445	22.1109	1.92424		115708523	791.858	608.281	68.3945		115722986	0.948207	0.001	0.55695		115721940	0.195165	5.25049	3.57643		115717395	6.07725	0.001	0.0220737
115709850	349.165	0.001	1.01727		115698716	27.5838	128.158	3.72887		115700903	44.4773	84.2886	3.84642		115702666	12.3136	0.001	0.413575		115702980	0.041887	0.187926	0.750974		115694803	0.415804	5.99634	0.0720883
115698901	259.602	0.0212053	0.77752		115704620	40.7736	267.499	23.4039		115716281	11.0332	14.8728	0.956352		115716295	66.3535	0.183133	2.27357		115721426	2.78744	3.80845	51.0714		115724762	25.5051	5.94553	0.0911133
115723515	9.33057	0.597301	0.0292807		115713227	1.18799	11.2981	0.992665		115711183	5.89668	65.7841	3.83681		115724464	38.8703	0.0768377	41.4002		115714843	0.0773507	0.921438	1.39758		115713279	40.2158	7.75719	0.143567
115697828	1594.39	149.418	4.93679		115705563	9.88524	83.3249	7.3276		115706424	58.2829	120.218	5.0795		115711375	1.16536	0.072165	1.17414		115699693	0.33198	1.90283	6.04652		115712336	21.3918	0.0152483	0.0776303
115697814	1361.89	123.565	4.25512		115712757	0.383329	0.851217	2.88237		115717391	53.7026	40.7105	4.70572		115713776	2.28156	0.0533937	0.724281		115706564	2.02825	1.69734	37.0035		115700676	5.4542	0.21344	0.0205773
115708313	18.7518	0.49872	0.060961		115725392	18.833	148.907	140.986		115711648	5.68651	63.3717	3.71576		115712516	0.912579	0.001	0.541656		115703031	1.62343	7.40252	29.4194		115698779	1.68395	0.0303853	0.0125933
115715839	17.1386	4.12336	0.0563263		115724110	1.96364	15.4991	14.659		115703531	2.73194	23.4947	1.37843		115714731	2.72881	0.001	0.0972873		115707573	0.86522	2.16483	15.5349		115710600	13.0381	0.899003	0.048363
115715807	55.3511	15.3414	0.181031		115699128	0.684514	9.36096	5.09982		115707210	0.114224	9.89678	1.50244		115698254	1.76948	0.0436843	1.16162		115705860	1.05559	0.721441	18.9401		115724717	9.35275	0.661557	0.0356323
115725002	49.4019	0.955052	0.162184		115704970	9.58071	20.1651	1.31913		115715278	24.7946	4.82911	2.21947		115723385	1.27126	19.8429	49.9225		115711617	4.64106	6.18286	83.1732		115708131	753.165	0.930458	2.81248
115710205	24.4566	0.001	0.0808713		115706020	39.6901	141.804	5.46332		115715127	20.6349	31.8106	1.85002		115702733	11.0812	0.001	0.416593		115712528	0.351057	0.001	6.26798		115704267	27.1197	1.45632	0.102307
115697724	92.2282	10.2273	0.303054		115694846	10.549	84.118	77.8339		115703628	10.9926	3.1488	0.99356		115725400	42.4826	0.114714	1.59854		115722694	3.95611	4.00302	69.6661		115713286	221.783	49.5101	0.842553
115723346	1184.78	3.40013	3.96457		115725712	2.26161	14.0347	16.5987		115707366	4.36258	9.5541	0.395026		115713000	14.274	0.001	0.543759		115714958	2.00749	3.79121	35.1396		115712095	1.18789	3.46354	0.044628
115717395	6.07725	0.001	0.0220737		115696759	0.211753	2.65638	1.54333		115697373	10.0704	2.03471	0.913913		115702309	457.425	1.13927	17.642		115706159	57.9554	81.9975	1014.16		115716805	3.57671	0.001	0.014611
115724770	1.38488	0.024763	1.38236		115708914	2.61244	27.3805	2.43962		115721752	41.537	34.5366	3.77262		115709974	9.16827	0.001	0.355395		115707279	3.85763	4.39196	67.2255		115705021	2.21359	0.001	0.009462
115724762	25.5051	5.94553	0.0911133		115706260	0.367607	9.30638	2.68006		115706302	24.4966	25.2963	2.226		115712188	0.069168	0.112351	2.67111		115705891	0.323576	0.001	5.61848		115723057	8.08145	0.146658	0.0319953
115709171	1.42695	0.0256443	1.11185		115698783	3.49472	29.5753	0.48579		115714581	0.970369	47.6866	12.1932		115709424	25.1708	0.0384807	0.988718		115714244	7.85968	2.74417	136.151		115718399	5.94939	0.042303	0.0238957
115713279	40.2158	7.75719	0.143567		115697365	503.325	3144.74	280.766		115708157	4.79503	62.3843	3.7371		115720851	0.0866527	0.066717	3.35075		115715331	1.1623	0.0797213	19.9952		115698717	15.7368	4.48885	0.0622917
115712336	21.3918	0.0152483	0.0776303		115709788	179.589	1162.25	105.168		115714928	16.6362	3.80624	1.53312		115697720	24.2756	0.257917	0.956235		115704439	0.001	0.117239	1.15654		115702390	1.61091	0.001	0.0151803
115710148	1.94122	0.001	1.44293		115709911	9.23419	38.397	67.2491		115698627	18.5638	20.1769	1.71776		115715029	8.8404	0.034933	0.348872		115725169	0.0957057	0.306248	1.62438		115704640	9.1241	0.651682	0.036731
115725422	1.91381	0.001	0.971664		115719542	7.89672	59.6981	57.4821		115700296	5.56064	3.01675	0.515923		115708017	9.87813	0.063618	0.390322		115724084	2.60447	1.89931	44.5228		115714653	1.50163	0.001	0.0362417
115700676	5.4542	0.21344	0.0205773		115697440	0.979106	5.50724	7.11728		115714527	5185.9	11838.3	483.639		115719066	28.2383	0.351416	1.13012		115699008	0.119131	0.001	2.01933		115713904	1.49342	0.001	0.0957027
115698779	1.68395	0.0303853	0.0125933		115711836	0.672903	5.92156	1.36986		115714839	32.2584	67.0388	3.02402		115701076	0.905839	2.67392	34.6669		115703023	1.16651	4.89506	19.8596		115724505	46.4548	4.91465	0.183262
115710600	13.0381	0.899003	0.048363		115716184	27.9159	137.985	12.5907		115701033	3.05764	1.56124	0.293346		115712115	0.121556	0.060399	4.61821		115725342	3.94836	1.11208	67.246		115706431	4.03296	0.142264	0.017111
115712253	1.87897	0.001	2.51695		115709517	0.0664093	0.573875	0.83863		115698056	3.65919	6.44273	0.351049		115698848	8.82252	0.001	0.357688		115712340	0.15134	2.53903	2.54857		115706394	1.44972	0.001	0.0968243
115724717	9.35275	0.661557	0.0356323		115701275	1.31493	4.93536	9.54308		115715228	77.5813	57.2758	7.46324		115694734	0.374825	0.001	14.1307		115709085	0.165648	0.001	2.79045		115724633	20.9807	0.0283767	0.0850607
115708131	753.165	0.930458	2.81248		115708266	2.41925	10.0264	0.916165		115706477	7.14449	16.2033	0.688739		115709862	687.237	3.00558	28.0676		115716755	2.52468	2.94422	42.7056		115718819	44.6773	0.001	0.181255
115704267	27.1197	1.45632	0.102307		115701290	0.968657	4.16634	7.008		115702322	30.6341	139.212	8.94404		115707640	0.112343	0.001	4.1171		115717120	0.56322	0.238459	9.49727		115701410	35.4222	2.04372	0.1453
115713286	221.783	49.5101	0.842553		115724694	1.02356	3.02239	0.147603		115704553	2.57858	1.29101	0.25227		115714075	26.8196	0.128562	1.11624		115715175	0.993153	0.346713	16.7322		115700282	112.295	0.001	0.460127
115712146	1.71085	0.001	1.05491		115700207	3.03305	7.67393	0.703513		115714568	337.166	113.578	33.2219		115699500	2.87884	0.001	0.122795		115722087	0.1547	0.373893	2.59035		115711516	18.0956	0.213382	0.075279
115716805	3.57671	0.001	0.014611		115705991	0.147198	1.60892	1.05371		115698914	0.377905	2.49651	0.163952		115717662	13.2627	0.001	0.563158		115701322	2.26286	47.6181	37.956		115717424	1.34337	0.001	0.138743
115705021	2.21359	0.001	0.009462		115716254	76.2926	293.671	10.9549		115699242	34.1964	21.0741	3.37598		115715847	0.108265	0.601002	3.91349		115714792	3.03275	9.52915	50.7562		115725581	1.23299	0.001	0.0688593
115723057	8.08145	0.146658	0.0319953		115705216	1.0267	7.53558	7.34576		115725165	3.09013	7.52376	0.307953		115722385	6.73424	0.0421513	0.289307		115721392	1.50972	0.420057	25.1605		115697362	33.7621	4.33949	0.141858
115718399	5.94939	0.042303	0.0238957		115716357	1.8233	10.4545	12.9946		115725275	3.84898	9.00534	0.385406		115719748	1.84747	0.001	0.370225		115702070	0.0983723	0.436484	1.62418		115724889	1.79575	0.0367103	0.001
115700871	3.61776	0.001	4.07636		115715704	1.4141	13.1487	10.0548		115701058	4.6716	11.3614	0.467968		115725580	20.2605	0.001	0.874806		115722714	0.154451	1.16729	2.55058		115696984	3.11897	0.863152	0.0141773
115698717	15.7368	4.48885	0.0622917		115719254	6.85623	46.2495	48.6913		115711601	39.7449	102.787	3.97924		115703584	26.7626	0.24043	1.15752		115724897	0.202529	0.001	3.33244		115712860	510.364	0.23738	2.1959
115702390	1.61091	0.001	0.0151803		115704555	9.10506	23.2731	64.3925		115707549	22.9304	235.257	15.7559		115719749	2.43527	0.001	0.365779		115717105	3.35544	80.5681	54.4639		115724982	4.5928	1.98221	0.0208773
115720719	1.55483	0.001	2.32726		115725233	0.160416	2.47669	1.12377		115702425	2.53738	11.2185	0.256518		115714076	17.2033	0.0840633	0.75891		115707478	0.29761	0.001	4.80136		115705985	3.85814	0.174382	0.0177107
115704640	9.1241	0.651682	0.036731		115707797	1.58959	8.07313	11.1784		115705581	82.4429	181.442	8.35615		115714078	11.5203	0.022113	0.510079		115698240	25.9963	21.2808	418.489		115714062	44.0372	0.001	0.192009
115714653	1.50163	0.001	0.0362417		115711594	2.42721	11.2868	0.355638		115717321	7.12704	14.0736	0.728465		115709116	1.23734	0.0905473	0.892872		115697024	0.121263	0.117068	1.93376		115708307	97.2248	12.9975	0.426228
115713904	1.49342	0.001	0.0957027		115721269	1.68348	10.6133	11.8001		115710658	13.5176	9.57616	1.38693		115708823	0.857163	0.063013	0.459933		115703317	0.0998003	0.441315	1.56599		115715833	18.0134	4.37696	0.0801977
115704961	1.46897	0.001	0.696487		115698860	0.777929	9.49447	5.34812		115698322	127.86	99.3518	13.1923		115699118	6.6757	0.001	0.30947		115724937	0.484241	5.67776	7.63534		115704335	0.227913	2.29896	0.001
115715816	1.46827	0.001	0.955162		115696999	0.279425	3.49973	1.90829		115723046	0.526106	17.7104	1.18717		115717427	0.893234	0.139207	32.3962		115719780	7.69844	0.001	121.187		115702709	1066.91	0.263915	4.83325
115724505	46.4548	4.91465	0.183262		115698989	4.49654	9.11877	30.7034		115704594	4.24996	1.13701	0.440715		115708114	0.797469	0.0595587	1.14598		115697513	5.78615	18.0569	90.6771		115699139	78.3802	1.54166	0.362433
115706431	4.03296	0.142264	0.017111		115722281	7.72795	103.888	9.94548		115705222	19.9603	790.452	206.224		115711944	16.1834	0.0291807	0.762628		115700665	3.63476	0.001	55.833		115704456	14.9887	0.08217	0.0711643
115706394	1.44972	0.001	0.0968243		115704641	0.771398	2.79584	5.26033		115716265	97.2361	29.1949	10.0772		115698881	0.11588	0.380438	4.14983		115706233	0.559206	0.382791	8.56897		115704995	12.1917	5.89395	0.0585567
115724633	20.9807	0.0283767	0.0850607		115705630	0.879006	2.87905	5.95849		115725665	8.49646	3.01872	0.881906		115697113	1.06405	1.24827	38.2418		115714708	4.44595	0.169299	67.7001		115721955	17.04	0.223147	0.08154
115716455	4.74451	0.001	3.99895		115701170	1.65348	26.7325	11.2109		115698664	4.86265	50.5635	3.41024		115710251	20.0055	0.17851	0.959101		115712514	0.195727	0.279931	2.96537		115724631	7.36729	0.967424	0.035934
115700705	1.38777	0.001	1.5674		115696842	13.4863	72.4036	91.4707		115705851	2.86159	0.989993	0.297922		115723037	0.258177	0.219066	9.13483		115710080	0.422819	0.108227	6.39525		115696872	452.893	0.275264	2.15844
115718819	44.6773	0.001	0.181255		115702588	3.23872	35.3659	3.4045		115698935	1.35506	10.3991	0.707914		115725180	1.58856	0.0821273	55.9287		115695892	0.124136	0.102857	1.86576		115704998	17.321	0.001	0.0835337
115701410	35.4222	2.04372	0.1453		115699412	154.768	935.152	90.0935		115696902	4.6236	1.67725	0.484713		115716830	0.992345	0.0754643	1.45463		115695605	0.148533	0.001	2.23028		115698494	8.14844	0.001	0.0402327
115700282	112.295	0.001	0.460127		115719363	0.844042	4.09756	5.67731		115721865	7.47007	19.9502	0.784899		115711095	1.85665	0.140505	1.04639		115696706	0.162633	0.073261	2.43599		115712639	26.178	11.6411	0.127076
115707596	1.96997	0.001	3.88266		115722670	0.865629	7.20316	5.7808		115714925	38.0509	23.7149	4.00028		115725291	12.2442	0.0429147	0.588337		115698966	1.76342	1.81594	26.5449		115709616	79.3373	3.91199	0.385135
115711516	18.0956	0.213382	0.075279		115709472	17.9189	134.645	117.373		115700694	5.52493	9.725	0.582582		115721415	0.103015	0.001	3.57768		115697561	1.09591	0.467267	16.4458		115707570	40.7176	0.001	0.198469
115717424	1.34337	0.001	0.138743		115699165	0.806972	4.61269	5.2674		115707030	7.39866	59.4098	4.11639		115720678	5.06965	0.001	0.251535		115722669	0.270689	9.72305	4.01693		115724730	2.87835	0.001	0.0151277
115725581	1.23299	0.001	0.0688593		115700717	18.5305	106.701	2.86491		115723422	30.4358	123.945	3.21809		115708902	0.345214	0.035775	12.0049		115724936	1.73143	18.7813	25.6831		115697967	2.08173	0.001	0.0112203
115697362	33.7621	4.33949	0.141858		115724721	12.6896	38.6517	1.9645		115725620	9.56929	4.73349	1.01693		115696908	1.0581	0.281323	36.6158		115705647	0.805669	0.138529	11.9182		115712289	3.25022	0.001	0.0176093
115724889	1.79575	0.0367103	0.001		115711657	0.319876	4.87204	0.478331		115703634	4.84242	3.95176	0.518127		115698217	2.41719	0.61623	83.202		115711548	2.96597	24.0933	43.7677		115701221	34.5254	0.001	0.178957
115696984	3.11897	0.863152	0.0141773		115714535	0.137593	1.98885	0.19604		115695993	7.80631	11.2953	0.839378		115699054	68.1847	1.06764	3.45783		115709035	1.5986	2.41825	23.5701		115721723	2.66534	0.001	0.0149427
115712860	510.364	0.23738	2.1959		115717257	1.47547	4.64714	0.230804		115718960	18.4192	17.1737	1.98832		115711381	6.59719	0.036433	0.336399		115699505	0.41395	0.001	6.0624		115710224	10.5926	0.001	0.0572993
115718155	0.430588	0.001	38.4524		115712676	5078.52	10214.7	793.01		115707498	7.8183	16.1057	0.845225		115716945	13.0716	0.268271	0.66885		115704978	0.778244	1.12919	11.3988		115708989	14.0678	0.030295	0.0761523
115722031	0.779213	0.001	0.93179		115708741	5.16337	61.8074	6.07577		115701434	6.6743	6.21096	0.724075		115696865	0.954984	0.074711	1.07785		115723198	10.1959	3.78875	149.486		115704534	4.38316	0.0302393	0.0253143
115714386	5.34518	0.001	3.72761		115701723	1.24079	3.93294	7.91835		115694820	45.5699	35.6041	4.95905		115702379	0.701606	1.15445	23.5934		115725211	0.219599	2.61975	3.20463		115716241	85.2237	2.45038	0.480294
115724982	4.5928	1.98221	0.0208773		115704108	10.4699	24.8066	1.65435		115697584	5.3862	138.583	9.81075		115705261	8.73307	0.001	0.449314		115710133	0.200422	4.03403	2.91865		115719617	6.83379	3.20054	0.0394403
115705985	3.85814	0.174382	0.0177107		115717442	4.76545	26.4561	2.61134		115711912	11.1357	61.0278	4.36655		115702964	37.1851	0.0890387	1.91835		115715921	0.991046	0.272562	14.4693		115699451	47.7686	0.314536	0.276926
115714062	44.0372	0.001	0.192009		115722668	0.63305	3.85853	4.01999		115717307	72.9117	18.3118	7.95275		115714504	3.84476	0.0375867	0.200623		115710354	4.29223	2.53968	62.6741		115709624	99.7795	4.71942	0.577458
115705218	2.08289	0.001	3.68935		115718777	2.03511	37.7294	12.927		115704523	371.645	234.475	40.5693		115725573	0.061409	0.001	2.02954		115714874	4.1528	0.313393	60.2895		115695663	10.1319	0.104356	0.059668
115708307	97.2248	12.9975	0.426228		115723304	9.33635	41.8232	4.13319		115717976	20.9744	19.9703	2.31499		115698260	0.0616583	0.242498	2.00805		115697385	2.70946	0.734707	39.0429		115722029	87.9798	0.04379	0.512842
115715833	18.0134	4.37696	0.0801977		115705990	8.63857	93.8991	9.30533		115698700	26.8107	23.5918	2.96484		115694711	3.02079	0.013213	0.159057		115721366	0.80173	3.62162	11.4656		115706798	7.71158	0.001	0.0458953
115703569	0.980035	0.0214597	0.531094		115722476	0.849705	4.20732	0.420353		115712493	6.75344	41.0813	0.748553		115711996	136.105	1.22879	7.17021		115715626	0.418052	1.02345	5.94557		115709296	507.45	0.166513	2.98397
115702709	1066.91	0.263915	4.83325		115725263	628.08	1510.07	100.792		115724709	6.49948	3.55306	0.722111		115698558	0.348661	0.645088	11.4314		115709103	0.907269	0.563352	12.9102		115719672	199.807	0.081414	1.17726
115710041	0.656429	0.001	0.980978		115725061	287.282	625.452	46.2428		115707182	30.7694	7.62751	3.45944		115722790	464.415	3.71693	24.66		115700961	24.5781	7.38793	348.266		115697576	97.2354	0.001	0.573853
115699139	78.3802	1.54166	0.362433		115698077	0.658996	3.42932	4.13572		115706225	388.727	187.269	43.7014		115706329	20.8355	0.042863	11.6514		115711229	36.3499	225.763	513.418		115703059	4.56474	0.132883	0.028037
115704456	14.9887	0.08217	0.0711643		115708655	1.86518	9.68683	0.966729		115701311	13.8137	104.502	7.6151		115701228	0.371183	0.55338	12.1302		115715663	0.956382	1.76891	13.4929		115702899	2.70385	1.32508	0.0175107
115704995	12.1917	5.89395	0.0585567		115714180	2.04899	21.7979	0.331327		115725738	0.099682	1.23227	0.090812		115720683	0.156566	0.158923	5.02856		115715146	1.66596	1.96075	23.3639		115712381	2.76031	0.001	0.017942
115702436	0.622817	0.001	0.990043		115717182	8.98545	32.6923	1.4509		115698303	189.82	50.6069	21.3429		115710057	0.197614	0.0782533	6.29965		115717193	1.12651	1.82196	15.7725		115709933	166.619	0.240632	1.02441
115708966	0.60078	0.001	1.18774		115698612	7.07488	26.7088	1.14627		115703202	215.32	467.433	24.3602		115702488	0.001	0.081243	1.16028		115713610	10.4011	3.48561	145.141		115721229	147.764	0.613047	0.919822
115721955	17.04	0.223147	0.08154		115709007	1.04403	3.70524	6.46858		115712924	4.50069	1.6261	0.511012		115713030	2.77724	0.001	0.150625		115724460	0.08555	0.114508	1.17124		115702764	63.5149	3.96468	0.402301
115724631	7.36729	0.967424	0.035934		115696826	2.55955	12.2382	1.23134		115696870	11.2788	18.2916	1.27995		115696542	0.106683	0.187437	3.36156		115704783	0.142174	0.611707	1.95338		115707525	1.98855	0.0226097	0.013703
115696872	452.893	0.275264	2.15844		115700949	2.46967	8.24294	15.2887		115708883	7.78114	3.74203	0.886268		115714604	8.66266	0.001	0.471081		115696940	0.390338	0.001	5.36273		115711534	31.8205	1.60645	0.206757
115695320	0.566905	0.001	1.66698		115716639	7.36474	41.0761	45.5888		115695900	0.417956	11.7475	0.87063		115704544	0.65431	0.0540883	1.06838		115717628	4.74104	32.3885	65.114		115698969	2.39084	0.012255	0.0165993
115704998	17.321	0.001	0.0835337		115697107	10.3018	33.0352	63.6297		115697658	3.86157	3.64161	0.441169		115719431	5.69676	61.0268	180.482		115710242	0.127606	1.76268	1.72573		115703740	16.981	0.0691033	0.111881
115698494	8.14844	0.001	0.0402327		115714711	1.02262	6.96755	6.31046		115707221	7.01476	2.15086	0.804915		115698651	3.40422	0.001	0.186351		115698673	0.932723	0.316592	12.5788		115717437	8.62977	0.001	0.0576547
115721259	2.35952	0.001	3.40497		115704151	0.22865	1.78189	1.40475		115707439	0.112287	14.9105	1.1196		115724555	0.137214	0.0350677	4.29089		115705896	0.282311	1.30907	3.79212		115725520	8.00508	0.001	0.0537
115712639	26.178	11.6411	0.127076		115704830	0.739051	3.94576	0.402276		115700756	6.02027	68.7005	5.1883		115699453	4.10966	0.001	127.525		115701206	0.850029	0.206723	11.3868		115714419	17.9552	0.094574	0.119344
115715792	0.512517	0.001	3.53554		115709663	13.3708	102.418	81.5677		115699220	49.0498	25.8032	5.70851		115716054	4.53609	0.001	0.249802		115698193	0.766451	0.593135	10.2659		115700969	6.18627	0.001	0.0419407
115709616	79.3373	3.91199	0.385135		115711907	12.4684	71.0045	7.25337		115698882	0.877736	5.76919	0.444173		115703601	0.637646	0.053635	1.13277		115708854	1.9194	14.0142	25.6458		115696934	4.04354	1.91139	0.0277637
115711042	0.504962	0.001	3.05296		115700808	2.47563	13.457	1.39158		115698309	527.765	1152.06	61.6767		115695791	1.10913	0.001	0.247956		115701523	0.604494	1.98944	8.06406		115696242	2.47708	0.34573	0.0176883
115707570	40.7176	0.001	0.198469		115725756	9.19879	20.6569	55.841		115722775	7.433	6.17537	0.871484		115724189	5.03706	0.001	0.281631		115703284	1.98869	1.0706	26.5371		115703034	61.879	1.62867	0.4188
115724730	2.87835	0.001	0.0151277		115704804	0.448565	9.74051	2.6899		115704094	12.3019	24.4572	1.44374		115715120	64.1001	0.001	3.57947		115711669	0.678437	1.77011	8.99918		115698661	30.2643	0.0778317	0.205894
115707992	0.493007	0.001	0.833545		115725109	20.1286	153.217	3.34471		115708126	9.10463	11.4644	1.06978		115704163	8.85011	0.001	0.495992		115707210	0.114224	9.89678	1.50244		115707963	10.6548	0.738954	0.0731323
115697967	2.08173	0.001	0.0112203		115724539	0.353085	29.2395	2.10979		115698033	9.01217	2.36977	1.06622		115706501	18.9679	2.28247	588.435		115696927	0.167242	0.379046	2.20422		115695350	4.30856	0.001	0.0307477
115707594	0.473326	0.001	0.883861		115695743	3.88385	11.1757	23.2011		115724688	10.8252	10.2644	1.28658		115705237	3.60417	0.038178	0.203576		115715620	1.06497	1.70781	14.0899		115714629	0.987695	0.0282633	0.001
115712289	3.25022	0.001	0.0176093		115725319	13.5802	157.743	80.879		115725330	939.888	2222.97	112.573		115719466	7.8248	0.0954307	0.44677		115697950	0.367227	1.37826	4.83582		115706498	9.35283	0.0718083	0.066009
115701221	34.5254	0.001	0.178957		115718932	26.9512	170.463	17.7868		115702395	14.8373	33.2023	1.78244		115721187	0.983271	0.829913	30.2999		115715217	0.811584	0.969594	10.6364		115724920	9.27953	1.84709	0.0656653
115711036	0.442281	0.001	1.31543		115715813	2.67966	13.3992	1.4026		115699708	6.4875	64.324	5.05646		115707446	23.9384	0.125749	1.37386		115698539	0.40229	1.11055	5.22327		115719767	17.3996	0.332475	0.12244
115721723	2.66534	0.001	0.0149427		115716079	55.4499	323.406	34.0852		115725080	1.47061	1.07431	0.179776		115715166	0.806803	0.0692317	0.413292		115707529	2.7714	8.89456	36.0355		115697865	36.5246	0.170625	0.257704
115710224	10.5926	0.001	0.0572993		115716284	1.7605	23.9782	2.52945		115709471	1.84047	0.632423	0.225014		115707268	0.26837	0.0663337	8.20991		115712018	0.134458	0.372495	1.7307		115705934	12.1372	0.341763	0.0880153
115714009	1.68758	0.0411713	1.9581		115717273	3.64282	8.46601	21.3547		115695793	68.3816	89.4457	8.35209		115710343	0.281287	0.001	8.54841		115708735	0.734934	0.0657227	9.51324		115722061	3.86075	0.013916	0.0287957
115708989	14.0678	0.030295	0.0761523		115707465	1.40639	6.82013	8.19515		115699532	38.1961	29.4239	4.67643		115719147	0.224598	0.055925	6.75365		115708264	1.69747	8.62672	21.9622		115701493	10.8797	0.0207503	0.07975
115704534	4.38316	0.0302393	0.0253143		115699431	0.547594	10.0582	3.169		115717728	0.151503	1.20082	0.09636		115699159	2.06526	0.093935	0.44774		115713057	0.207479	1.96377	2.67183		115705058	29.4085	0.710875	0.219923
115709587	0.413653	0.001	0.851055		115707698	20.5677	100.168	10.5753		115709619	316.04	122.237	39.0604		115712540	220.688	0.724622	152.632		115707153	0.278819	1.51361	3.58703		115707937	238.807	122.777	1.78126
115716241	85.2237	2.45038	0.480294		115716468	2.36709	23.0817	0.40389		115700506	92.01	88.1895	11.4034		115724530	1.89973	0.088833	2.31405		115712162	0.27252	0.489507	3.50533		115721125	34.7226	0.235262	0.262412
115699451	47.7686	0.314536	0.276926		115707843	1020.13	2247.54	175.253		115716934	3.8824	50.3331	4.07046		115714235	2.23914	16.8478	67.55		115712267	0.435146	0.433954	5.60253		115725646	78.2891	34.2391	0.593186
115709624	99.7795	4.71942	0.577458		115718740	13.277	149.159	2.28353		115704268	1.66973	1.20488	0.208906		115707696	6.17716	0.0167363	3.2474		115718445	0.386952	1.05283	4.96269		115700827	46.9863	0.033222	0.357411
115695663	10.1319	0.104356	0.059668		115707491	18.7568	58.7068	107.27		115723219	0.778265	102.985	6.34899		115699728	0.782039	6.60687	23.2418		115708974	0.184382	0.212832	2.35001		115721690	70.9204	1.90271	0.54157
115701267	3.32562	0.001	2.98449		115717101	17.7575	41.5164	3.05589		115720918	580.674	1138.49	72.6352		115706951	0.090801	0.001	2.65718		115718535	0.374702	0.0265923	4.77133		115712623	1.43115	5.34169	0.0936967
115705854	0.389864	0.001	2.18836		115706284	32.6415	139.458	5.62065		115704803	0.0982057	5.6463	0.787496		115708151	0.327088	1.3559	9.60465		115695674	0.256572	0.030969	3.25791		115697909	6.21285	0.10705	0.0489173
115722029	87.9798	0.04379	0.512842		115725231	0.230682	3.36708	1.30792		115719612	119.406	258.078	14.9619		115711961	0.290829	0.837691	8.51856		115716418	0.294212	0.0824263	3.7235		115724887	9.21466	0.173972	0.0725167
115720577	0.379022	0.001	0.970568		115700759	1.99389	29.0719	11.2953		115714622	11.2643	16.7143	1.41237		115715242	24.2014	0.001	1.43764		115708189	4.32678	4.60381	54.8718		115706480	35.2254	0.269847	0.275259
115696963	0.141914	0.001	10.9412		115702651	47.6403	118.417	8.31776		115699454	8.41348	62.9303	5.23238		115725222	14.6423	0.13352	0.87156		115721992	0.184384	0.21055	2.31828		115701203	18.5602	5.71605	0.148098
115706798	7.71158	0.001	0.0458953		115701095	9.71709	52.2894	5.60041		115709304	230.632	121.735	28.9816		115718565	0.103754	0.001	3.01505		115714581	0.970369	47.6866	12.1932		115701164	34.7123	0.312544	0.277972
115695703	1.43565	0.036458	1.12501		115707425	4.66479	13.6688	26.3677		115702697	7.60224	35.7776	0.957703		115725099	8.79785	0.138427	0.526479		115701508	7.9962	1.18125	100.013		115701500	10.4187	0.001	0.0843617
115697760	0.102676	0.001	7.5262		115715741	0.598674	2.25928	3.36679		115707892	1.43873	1.21551	0.182273		115700486	0.612748	0.055604	1.03423		115700277	0.341028	0.385104	4.24097		115720946	0.125752	3.04263	0.001
115725678	0.373954	0.001	0.821732		115715658	3.52056	28.988	3.12628		115709370	13.7408	10.7749	1.73709		115723213	26.1654	0.001	1.56469		115707034	8.68753	11.474	108.154		115707554	725.214	0.40165	5.82964
115710978	4.17121	0.001	2.89505		115722196	363.844	1005.64	64.0693		115717103	36.8357	21.5159	4.67684		115709056	0.80987	0.0733097	0.963951		115712572	0.103632	0.04129	1.27805		115696266	2.06685	0.195944	0.0176797
115709296	507.45	0.166513	2.98397		115701190	8.51993	48.0966	5.22412		115702104	9.75831	10.9618	1.24588		115704432	2.16363	0.001	0.132224		115716856	0.164703	0.346834	2.02437		115716135	13.6446	0.568439	0.111287
115719672	199.807	0.081414	1.17726		115718604	0.324869	1.9746	0.215717		115718171	4.30248	20.394	0.550017		115704798	3.05737	0.0289953	5.03376		115709282	8.11288	5.78932	100.153		115708734	14.1047	3.06094	0.11516
115708111	0.279435	0.001	20.0172		115708940	0.212895	2.1252	1.19062		115714544	6.67385	11.2116	0.856812		115700539	44.3733	1.07723	2.70018		115708930	33.428	9.87964	410.685		115712629	81.9718	51.2308	0.669937
115697576	97.2354	0.001	0.573853		115719622	1.65305	5.51209	9.26986		115720850	366.071	652.425	47.0048		115712315	1.32882	0.120526	0.669241		115699684	15.1531	1.5402	185.916		115722048	3.07339	0.001	0.0263003
115703059	4.56474	0.132883	0.028037		115707282	567.524	1137.67	100.442		115707962	56.3495	15.4512	7.26202		115707813	2.19424	0.0587473	64.1516		115704826	0.218002	0.398378	2.65746		115697678	0.121991	1.03581	0.001
115712381	2.76031	0.001	0.017942		115701450	275.289	726.471	48.8588		115713184	27.422	42.4747	3.54296		115707831	0.224346	0.032335	6.53032		115709034	20.5686	7.44914	250.911		115720709	19.0128	0.001	0.159026
115709933	166.619	0.240632	1.02441		115715768	0.133141	0.847898	0.739559		115700787	87.8311	83.9639	11.3628		115721032	4.45465	0.001	0.272441		115695891	4.62497	30.0628	56.3871		115721181	4.28289	2.51988	0.037041
115721229	147.764	0.613047	0.919822		115721141	1.93686	4.47875	10.7839		115722556	33.676	115.201	4.35763		115700432	0.001	0.091517	1.64906		115721894	1.04537	0.248995	12.721		115715223	47.1009	0.324344	0.398088
115704307	0.315772	0.001	0.841756		115724873	0.472279	1.9899	2.59595		115698070	36.2615	13.0489	4.69607		115725207	0.858579	0.203552	24.19		115721783	1.69854	17.0254	20.6491		115698701	80.8797	1.09486	0.688827
115702764	63.5149	3.96468	0.402301		115713180	0.771058	4.37285	0.484234		115707603	367.147	701.25	47.7891		115697525	6.04766	0.092637	0.370814		115718652	3.46265	9.68804	42.0968		115723190	6.03734	0.001	0.052974
115707525	1.98855	0.0226097	0.013703		115720924	9.04436	102.853	11.3956		115699288	3.11087	2.95986	0.406763		115703199	2.26186	0.132897	63.5118		115701460	1.12321	2.20007	13.5586		115713995	2.78387	0.001	0.0250013
115711534	31.8205	1.60645	0.206757		115722896	10.2082	24.4956	56.0798		115707365	0.670852	9.0813	0.0887347		115723398	0.0755843	0.22296	2.08724		115721829	0.750501	2.57612	9.03036		115695781	2.37203	1.44128	0.021824
115698969	2.39084	0.012255	0.0165993		115695661	4.08005	10.3965	22.3547		115715585	5.78424	1.79208	0.759289		115712997	46.9247	0.001	2.90533		115724564	1.75625	0.533855	21.1357		115723228	11.0625	2.02108	0.0989753
115703740	16.981	0.0691033	0.111881		115717003	0.486031	2.55264	0.286382		115701179	1.6827	10.0722	0.221879		115704175	5.08452	0.001	0.318161		115715225	0.7551	0.961812	9.07129		115703130	10.6288	0.171244	0.09604
115717437	8.62977	0.001	0.0576547		115725053	7.18807	66.6193	39.0836		115704140	14.8217	31.8737	1.95403		115715648	0.643723	0.001	17.798		115698308	1.09378	0.001	13.1342		115710104	28.3972	2.57938	0.260186
115725520	8.00508	0.001	0.0537		115719275	1.01902	83.2629	5.47041		115698646	17.3175	44.2497	2.29971		115697791	13.6828	0.0940243	0.863684		115715113	1.0138	1.92383	12.1391		115709170	5.67691	0.163438	0.0529377
115714419	17.9552	0.094574	0.119344		115712719	12.3932	65.3274	7.3234		115703134	18.7886	28.0188	2.50098		115698574	0.814121	0.91763	22.12		115713320	0.191487	3.4094	2.27886		115716817	16.6108	0.001	0.155043
115704660	1.46982	0.040322	0.809706		115722407	18.2812	38.3311	3.30354		115715307	1.76687	89.2271	13.6878		115708906	1.28984	0.121232	1.36701		115716164	0.51658	1.16213	6.16		115696966	1.45674	0.0478087	0.001
115700969	6.18627	0.001	0.0419407		115697903	18.0581	38.7124	3.27165		115708719	10.8114	3.60222	1.43999		115708222	1.26026	0.118677	1.03109		115704968	0.582337	0.444971	6.92763		115707414	43.5762	0.751899	0.405957
115712883	3.09765	0.001	2.75517		115713865	28.0702	131.239	14.7409		115696993	9169.63	10104.2	1220.99		115714867	24.1237	0.102273	15.5602		115722337	1.86287	9.16614	22.0986		115721147	10.1389	0.001	0.096604
115696934	4.04354	1.91139	0.0277637		115714632	1.47863	7.29979	7.88875		115712403	2.59311	2.24207	0.348324		115705365	15.7297	0.11034	1.00506		115716855	0.923065	3.31746	10.943		115697283	26.2785	0.327526	0.250212
115696242	2.47708	0.34573	0.0176883		115704994	6.43552	50.9906	1.17773		115694770	900.845	1871.37	120.887		115710062	4.12727	0.001	0.265653		115706441	0.935696	4.157	11.0767		115709512	104.491	7.74686	0.995519
115703034	61.879	1.62867	0.4188		115695587	0.488236	4.89183	0.555162		115699719	12.0302	12.5693	1.61984		115722181	3.69407	0.001	99.9333		115720531	0.709419	7.1148	8.38917		115724986	9.64355	1.41412	0.0927863
115698661	30.2643	0.0778317	0.205894		115716580	42.9329	225.193	25.5625		115699312	18.8686	262.402	22.7782		115725267	4.77813	0.0945597	13.59		115711150	0.152742	0.001	1.79529		115723014	14.098	3.46412	0.138354
115707963	10.6548	0.738954	0.0731323		115698787	1.10511	7.99268	1.98263		115701000	3.70445	22.1109	1.92424		115716530	8.13898	0.0519783	0.530361		115720788	2.05295	27.6426	24.2521		115702758	18.5482	1.06762	0.184
115695350	4.30856	0.001	0.0307477		115700747	3.06256	9.29336	16.2675		115698716	27.5838	128.158	3.72887		115701287	4.37637	0.0567067	0.286644		115712362	1.691	12.0667	19.9138		115722090	3.13304	0.820753	0.031989
115714629	0.987695	0.0282633	0.001		115713866	0.180269	1.29471	1.33466		115704620	40.7736	267.499	23.4039		115699742	11.7078	0.075317	0.767129		115714543	0.85812	0.25263	10.0647		115710201	5.04161	1.30142	0.050903
115706498	9.35283	0.0718083	0.066009		115712233	10.4442	52.7288	55.406		115713227	1.18799	11.2981	0.992665		115722728	32.8401	0.001	2.15605		115698836	0.367974	0.450931	4.29929		115697232	213.771	0.329247	2.12516
115724920	9.27953	1.84709	0.0656653		115717376	17.1167	47.3215	90.3499		115705563	9.88524	83.3249	7.3276		115724724	1.14626	0.111512	1.38217		115719095	0.855666	7.09787	9.96363		115710460	12.9735	0.147671	0.131395
115719767	17.3996	0.332475	0.12244		115714479	124.636	449.716	657.869		115701338	70.6035	97.9508	9.66424		115714912	2.40029	26.3291	63.9927		115712759	1.39651	14.0899	16.2308		115697004	13.1062	0.001	0.132769
115697865	36.5246	0.170625	0.257704		115707674	1.75316	6.22054	0.323979		115715751	24.4137	11.407	3.34828		115714130	0.100889	0.182174	2.62775		115725611	2.818	4.37003	32.6893		115703179	78.1923	1.49351	0.789393
115705934	12.1372	0.341763	0.0880153		115711322	15.6565	76.4776	8.76209		115704970	9.58071	20.1651	1.31913		115711137	0.137826	0.0656173	3.58045		115704442	0.142367	0.103008	1.62976		115701553	23.9211	0.001	0.243725
115723558	2.22037	0.001	2.66945		115708334	8.07451	36.0997	4.14207		115706020	39.6901	141.804	5.46332		115716207	35.8522	0.166653	2.40626		115725047	0.267895	0.344155	3.07563		115704667	213.193	0.001	2.16443
115712504	0.23104	0.001	0.770952		115715128	0.001	6.35323	0.73204		115705594	41.9631	74.2321	5.78894		115697531	2.4269	11.6901	63.3702		115710254	0.134802	0.231083	1.53783		115715878	2.99046	0.001	0.0313503
115711100	1.46947	0.042098	0.891409		115695604	2.02732	12.7858	10.5901		115711158	33.7261	25.98	4.66495		115719438	1.80663	0.296112	46.9668		115706177	13.5236	8.14403	155.084		115720977	41.0584	3.55952	0.424071
115717999	1.68383	0.0482337	0.934829		115725714	4.83024	50.9662	25.223		115725545	16.3577	6.22309	2.26814		115696705	0.073366	0.001	1.88005		115712263	0.458619	0.001	5.24534		115711919	22.2595	0.156672	0.230477
115722061	3.86075	0.013916	0.0287957		115706721	1.07775	6.36689	0.737082		115708914	2.61244	27.3805	2.43962		115716021	53.2336	0.358139	3.58005		115696852	0.103184	0.0981623	1.1715		115700966	6.51233	0.430225	0.0685363
115698079	2.77445	0.001	2.6023		115720648	158.057	556.873	29.4966		115706260	0.367607	9.30638	2.68006		115699433	2.46725	0.137958	1.40571		115712183	0.542824	0.26654	6.20401		115724980	7.90899	0.401037	0.0832073
115698663	1.00225	0.0292403	1.29472		115718954	2.42535	21.8053	12.6595		115698783	3.49472	29.5753	0.48579		115722002	11.3584	0.001	0.766804		115714548	0.404514	2.02336	4.61654		115712529	2.76869	0.001	0.0298993
115701493	10.8797	0.0207503	0.07975		115707682	28.7456	165.351	19.1668		115697365	503.325	3144.74	280.766		115717986	0.30267	0.001	7.76558		115707919	13.3523	6.76553	152.165		115724548	2.90454	0.220547	0.0313507
115705058	29.4085	0.710875	0.219923		115701498	32.8306	278.152	32.2544		115701515	20.9171	31.171	2.91122		115707723	13.271	0.001	0.899932		115723355	1.24965	0.256337	14.1784		115700828	77.1412	0.269494	0.812027
115722072	0.224066	0.001	0.655195		115709575	24.4983	116.141	13.5101		115701490	14.6405	11.2442	2.04141		115725556	0.675856	1.24714	17.3442		115704610	0.152159	0.546406	1.71223		115723056	5.06494	0.0334333	0.054809
115721125	34.7226	0.235262	0.262412		115713941	45.2283	428.953	50.0351		115698766	43.068	23.4249	6.01602		115711554	0.639793	2.75608	16.3874		115721920	1.65769	0.001	18.7157		115700881	31.1178	0.198095	0.332547
115725646	78.2891	34.2391	0.593186		115699694	64.7956	207.25	334.507		115709788	179.589	1162.25	105.168		115698672	0.103074	0.080155	2.57305		115714681	0.521367	0.163024	5.87536		115700595	94.874	0.447358	1.01206
115700827	46.9863	0.033222	0.357411		115713069	9.44274	21.1964	48.6303		115716184	27.9159	137.985	12.5907		115700026	1.10124	0.110549	1.32512		115724954	8.84677	14.1508	99.3387		115707129	2.00571	0.001	0.0224377
115721690	70.9204	1.90271	0.54157		115699345	13.2002	59.4601	7.00708		115708266	2.41925	10.0264	0.916165		115709972	1.3816	0.688399	34.5923		115723574	19.6451	1.02679	219.955		115701432	5.30575	0.0356627	0.0580807
115697909	6.21285	0.10705	0.0489173		115698812	26.6367	62.8094	136.841		115717378	20.2471	10.0318	2.88202		115712489	37.4945	0.230942	28.1282		115699179	0.378865	0.001	4.22609		115722038	3.8367	2.73105	0.0424887
115724887	9.21466	0.173972	0.0725167		115710567	138.644	1133.49	133.715		115711557	12.6358	8.8835	1.80107		115722828	16.2326	0.215605	1.1195		115700416	0.464793	1.89896	5.16918		115699384	77.1131	0.001	0.837137
115706480	35.2254	0.269847	0.275259		115717341	1.3507	11.6883	1.38314		115705602	1.26334	0.71044	0.181567		115700857	6.18537	0.001	0.42756		115714783	0.310038	1.47203	3.44063		115703115	12.0971	1.38582	0.133603
115701203	18.5602	5.71605	0.148098		115697744	2.37946	6.16571	0.45996		115715219	4.16111	3.05174	0.59653		115718454	4.06523	1.95448	99.7062		115712197	7.18835	2.40463	79.99		115703792	258.799	0.001	2.89411
115701164	34.7123	0.312544	0.277972		115695974	16.055	172.2	20.5752		115724694	1.02356	3.02239	0.147603		115723715	1.41854	0.0221323	2.56531		115708874	0.151926	0.001	1.67393		115698706	9.58563	0.10482	0.108937
115701500	10.4187	0.001	0.0843617		115698854	0.29516	2.10128	1.49569		115700207	3.03305	7.67393	0.703513		115713728	1.02143	2.44397	25.0112		115701376	23.9277	22.7732	264.427		115705297	51.3377	1.24724	0.580898
115698601	0.761533	0.0236603	1.68357		115705845	0.817755	2.05573	4.15104		115716254	76.2926	293.671	10.9549		115697794	0.207681	0.173145	5.0225		115694795	1.67335	5.96488	18.1818		115703063	16.7207	0.869811	0.189936
115715986	2.77817	0.001	2.2703		115706976	10.542	53.2341	6.38732		115715485	0.57757	0.91716	0.0839643		115713214	1.35082	8.44366	32.6846		115707692	5.83026	0.001	63.175		115724983	10.1291	2.21292	0.116535
115707554	725.214	0.40165	5.82964		115712965	2.14257	19.7884	0.417062		115716883	25.0257	13.5501	3.60286		115724614	5.00194	29.6047	119.729		115712272	0.225317	0.0892107	2.42553		115697060	2.53551	0.331667	0.0299297
115696266	2.06685	0.195944	0.0176797		115717275	21.08	91.1386	4.12789		115709045	241.433	411.793	34.8628		115722429	0.066174	0.001	1.55701		115713090	0.323054	2.9644	3.48093		115725418	11.5221	0.0770333	0.134619
115719239	0.095611	0.001	5.57005		115697431	13.6621	75.4126	9.10712		115700242	112.527	99.9793	16.2535		115707946	0.136745	0.001	3.15154		115718674	0.389776	0.108147	4.2011		115720471	3.15186	0.001	0.037891
115716135	13.6446	0.568439	0.111287		115702596	12.3968	30.8288	62.7022		115698313	5.83822	2.31812	0.848825		115706565	59.7269	1.03579	4.13767		115699381	0.399573	0.899137	4.29898		115721441	6.73795	1.67788	0.0816537
115708734	14.1047	3.06094	0.11516		115712250	1116.83	2932.78	219.593		115725233	0.160416	2.47669	1.12377		115712066	167.11	0.001	11.593		115719513	36.0862	252.933	388.712		115712177	2.86316	0.0242613	0.03532
115722048	3.07339	0.001	0.0263003		115725293	13.5443	104.688	12.6912		115711594	2.42721	11.2868	0.355638		115724858	7.67326	0.001	0.534661		115707515	20.2287	24.4325	217.768		115699396	16.3471	1.50649	0.197981
115720709	19.0128	0.001	0.159026		115712801	158.472	762.892	92.9349		115695852	5.36128	3.12802	0.788897		115698891	1.67445	0.577912	38.121		115724160	0.697704	2.74728	7.49268		115712911	0.99493	0.0375053	0.001
115723269	1.38226	0.001	2.19543		115720724	5.43298	15.6654	27.323		115722281	7.72795	103.888	9.94548		115700299	0.343752	0.578951	7.74746		115698916	0.185721	0.0372167	1.98058		115724135	35.0254	0.130808	0.426054
115715223	47.1009	0.324344	0.398088		115708221	0.816202	3.88836	0.474896		115711588	51.8598	17.1802	7.76001		115718515	0.151785	0.0368657	3.37536		115721738	1.41709	1.71135	15.103		115717388	9.68561	0.119247	0.118562
115698701	80.8797	1.09486	0.688827		115707082	90.0095	742.748	90.972		115702881	10.2441	10.0281	1.5337		115701243	0.974308	6.17235	21.4917		115719423	0.595295	1.37075	6.27728		115706117	64.1076	0.823219	0.79373
115723190	6.03734	0.001	0.052974		115718720	0.630297	3.40711	3.16469		115706571	33.4579	29.416	5.00744		115719499	0.487483	0.225305	10.677		115719625	6.82093	8.71602	71.3136		115702761	41.2327	0.997873	0.511924
115713995	2.78387	0.001	0.0250013		115722940	74.8005	389.401	47.8115		115702588	3.23872	35.3659	3.4045		115694801	38.4305	0.200853	22.7836		115715647	0.826575	2.68858	8.60133		115717186	37.514	0.001	0.470048
115723228	11.0625	2.02108	0.0989753		115712564	1.75215	9.75171	1.1995		115699412	154.768	935.152	90.0935		115703762	2.67069	0.039941	4.40306		115699573	16.1756	1.20701	168.251		115697758	3.55612	0.115377	0.045543
115703130	10.6288	0.171244	0.09604		115710554	8.41807	18.7313	42.2474		115724075	16.2164	9.19531	2.45027		115712815	185.922	1.45247	13.0032		115721891	0.194814	0.313812	2.01621		115695955	20.9717	0.140402	0.263773
115710104	28.3972	2.57938	0.260186		115714407	2.3796	8.3401	0.476786		115697761	29.9446	26.9035	4.5521		115712640	0.215058	0.07675	4.68608		115697512	0.453166	0.001	4.69626		115723302	9.56274	0.588036	0.120905
115709170	5.67691	0.163438	0.0529377		115706724	9.29136	70.0435	8.63763		115714280	5.61365	10.9652	0.856919		115705890	0.592999	0.001	12.8626		115711454	1.12049	0.586259	11.5993		115714709	25.0268	0.234297	0.317707
115716817	16.6108	0.001	0.155043		115699770	25.7668	67.5292	5.18461		115721852	13.2355	22.5471	2.02528		115715760	0.220585	0.0591213	4.76847		115705222	19.9603	790.452	206.224		115721179	92.9111	0.485298	1.17686
115696966	1.45674	0.0478087	0.001		115706736	4.72562	14.8296	23.559		115695939	99.9482	85.061	15.2981		115697437	27.7321	0.397444	1.94519		115697144	0.206111	0.349874	2.11747		115697536	7.92768	4.20393	0.102056
115707414	43.5762	0.751899	0.405957		115702739	1.16965	8.35085	5.81272		115699388	22.4463	29.9215	3.45929		115704625	0.62948	0.287951	13.5999		115712939	2.77775	4.87628	28.6007		115696976	6.43929	0.001	0.083186
115721147	10.1389	0.001	0.096604		115719266	7.53088	53.55	6.69786		115700717	18.5305	106.701	2.86491		115715761	0.682374	0.071726	1.14476		115712206	1.57342	1.28646	16.1388		115699292	3.84913	1.73657	0.050571
115697283	26.2785	0.327526	0.250212		115706709	4.06113	12.6852	20.1407		115724721	12.6896	38.6517	1.9645		115725199	0.159859	0.001	3.42811		115697175	0.839677	2.55066	8.59577		115721006	26.7078	0.259931	0.348649
115709512	104.491	7.74686	0.995519		115699161	42.2637	114.182	209.461		115705677	29.0434	44.1914	4.5139		115706953	0.37183	0.637976	7.93501		115704265	1.56191	8.05664	15.9969		115715691	22.4678	29.3139	0.296161
115724986	9.64355	1.41412	0.0927863		115716472	70.2812	370.692	46.3731		115711657	0.319876	4.87204	0.478331		115710308	0.296899	0.001	6.30613		115701485	0.989238	4.04277	10.1124		115702405	3.06325	1.10364	0.0412753
115723014	14.098	3.46412	0.138354		115716781	12.9546	55.015	2.62227		115714535	0.137593	1.98885	0.19604		115699115	38.4518	1.0077	2.7152		115714676	0.394862	0.227567	4.01117		115719616	110.721	43.4025	1.45979
115702758	18.5482	1.06762	0.184		115699908	19.483	85.8526	95.9504		115717257	1.47547	4.64714	0.230804		115708058	0.785512	1.48173	16.5371		115699478	0.460685	0.001	4.67878		115706309	7.80841	1.12592	0.103911
115722090	3.13304	0.820753	0.031989		115719615	48.5641	471.795	59.2104		115712676	5078.52	10214.7	793.01		115719364	0.32513	0.074482	6.82877		115715226	0.701423	5.62091	7.10806		115714777	1.9558	0.0172643	0.001
115716908	0.161111	0.001	1.32369		115695670	1.97621	4.37384	9.69381		115695895	69.8794	65.7488	10.9504		115697489	2.58829	7.8725	54.1754		115698617	0.187214	0.001	1.88943		115708262	11.1782	2.40921	0.148846
115710201	5.04161	1.30142	0.050903		115700524	25.5435	128.697	5.20984		115708741	5.16337	61.8074	6.07577		115714558	1.07345	0.115108	0.747341		115725440	14.0734	49.9262	142.618		115699199	1462.18	271.878	19.6003
115724176	0.667183	0.0230317	1.71987		115712741	11.735	57.4491	7.22224		115722025	22.1077	15.5008	3.47651		115720088	0.827855	0.089035	0.98643		115722123	368.136	2247.58	3729.08		115708791	857.382	0.001	11.6351
115697232	213.771	0.329247	2.12516		115697293	3.58785	10.4874	17.4146		115695742	2.12377	1.20559	0.335586		115706792	0.731607	0.0881817	15.2468		115715808	0.147124	0.001	1.46589		115719337	8.81868	0.001	0.121077
115710460	12.9735	0.147671	0.131395		115706836	3.85947	11.0134	18.7092		115704108	10.4699	24.8066	1.65435		115720952	1.47484	0.578016	30.7122		115724122	1.01689	0.681045	10.1783		115701418	104.989	2.12385	1.45303
115697004	13.1062	0.001	0.132769		115715706	6.56075	21.7236	1.34436		115706688	41.075	47.6408	6.50205		115694862	0.643371	3.17586	13.306		115706862	25.0765	35.2434	251.112		115706950	156.452	7.53749	2.16666
115703179	78.1923	1.49351	0.789393		115697164	3.71845	11.7843	18.0061		115717442	4.76545	26.4561	2.61134		115703608	0.790647	0.351389	16.3364		115705423	0.889935	0.0918243	8.9025		115711305	1.96981	0.001	0.028268
115701553	23.9211	0.001	0.243725		115723684	5.14805	107.276	24.8336		115711679	60.3073	24.6073	9.56623		115698849	0.267427	0.05617	5.46947		115705859	1.21377	0.39837	12.0699		115698742	1.03668	0.0420273	0.001
115710276	1.33226	0.001	2.0916		115697988	7.04814	28.5694	1.45299		115718777	2.03511	37.7294	12.927		115723039	0.566601	1.5381	11.5898		115722699	3.53951	33.1022	35.0781		115698729	15.5557	2.94672	0.219332
115698900	1.51074	0.052311	1.04526		115707294	17.7452	122.553	15.636		115723304	9.33635	41.8232	4.13319		115705373	0.201446	0.001	4.10276		115704049	3.43128	0.221299	33.9507		115703618	49.539	0.001	0.696362
115704667	213.193	0.001	2.16443		115696956	16.4246	61.0121	3.39362		115705990	8.63857	93.8991	9.30533		115702750	0.406939	0.001	8.18014		115706168	3.91126	4.14288	38.6507		115724740	5.65322	1.93517	0.0804693
115715878	2.99046	0.001	0.0313503		115708275	40.2412	229.917	29.61		115706263	85.5418	61.7875	13.6703		115716717	7.14177	0.0441087	4.15214		115718433	1.09016	0.001	10.7662		115697225	54.844	1.46293	0.775423
115720977	41.0584	3.55952	0.424071		115698284	10.5335	51.1078	50.2135		115722476	0.849705	4.20732	0.420353		115704916	0.228881	0.001	4.56358		115709564	6.5079	5.00252	63.8868		115701423	1.8651	0.001	0.0277317
115711919	22.2595	0.156672	0.230477		115714034	32.366	79.7396	6.73669		115725263	628.08	1510.07	100.792		115700964	0.500905	0.432616	9.90517		115714651	0.995354	1.96278	9.73419		115725477	1.25922	0.051603	0.0151603
115700966	6.51233	0.430225	0.0685363		115705355	1.25569	4.60401	5.95092		115725061	287.282	625.452	46.2428		115702647	8.16602	0.001	0.592485		115721833	0.676529	0.119952	6.61133		115720930	29.4511	0.254476	0.423619
115724980	7.90899	0.401037	0.0832073		115724851	1.02648	5.55129	4.85258		115708655	1.86518	9.68683	0.966729		115722798	6.48133	0.084188	0.474428		115711194	2.5956	0.637403	25.2011		115724623	2.54785	0.001	0.0377257
115712529	2.76869	0.001	0.0298993		115718410	9.8079	39.5216	2.06188		115706019	8.07924	16.3514	1.30382		115710022	3.8475	0.419229	1.94566		115713490	0.165944	0.228451	1.60091		115703025	78.9871	0.001	1.14352
115724548	2.90454	0.220547	0.0313507		115704882	7.66951	43.8157	35.8646		115714180	2.04899	21.7979	0.331327		115717430	0.209354	0.22185	4.09228		115708841	2.57384	1.93633	24.9081		115698039	9.05358	0.121047	0.134439
115700828	77.1412	0.269494	0.812027		115706326	25.2271	129.53	16.9583		115717182	8.98545	32.6923	1.4509		115724964	5.65992	7.80705	111.004		115710082	0.213927	0.704699	2.05877		115710150	751.264	1.02055	11.0858
115723056	5.06494	0.0334333	0.054809		115698953	0.24337	2.54402	0.335275		115705814	0.808153	1.57268	0.158631		115712764	2.54364	1.06703	49.5518		115716446	2.34726	16.3556	22.6153		115707418	4.51377	0.554859	0.0676543
115706400	3.52033	0.001	2.02131		115699366	62.4576	433.595	57.0877		115698612	7.07488	26.7088	1.14627		115710216	1.6179	0.085491	31.4727		115708840	0.279628	0.200733	2.67869		115724257	40.8119	0.001	0.605207
115700881	31.1178	0.198095	0.332547		115715772	0.636117	4.13381	7.61982		115696826	2.55955	12.2382	1.23134		115706296	5.54393	0.0343563	0.406267		115710102	0.265069	0.485145	2.52886		115706491	35.7449	12.0985	0.534112
115700595	94.874	0.447358	1.01206		115707473	1.20863	17.0474	5.64229		115718750	2.16047	5.70592	0.353544		115722662	11.0999	0.071634	6.24548		115696914	0.193191	0.511502	1.82993		115716405	1.21311	0.050828	0.001
115707129	2.00571	0.001	0.0224377		115700893	4.25709	17.8874	19.8208		115711842	271.67	354.458	44.4332		115717210	6.48085	0.001	124.795		115715013	6.52186	21.506	62.0351		115705982	1.44883	0.060659	0.0102593
115709434	1.61702	0.293126	87.4988		115718142	71.3328	174.024	15.1484		115704830	0.739051	3.94576	0.402276		115700869	0.779405	0.133438	14.8358		115716560	26.9356	14.4178	254.7		115706454	9.20302	1.11286	0.138701
115708894	0.723003	0.130546	38.9494		115705554	0.926706	5.4098	4.26789		115717453	29.4489	60.3285	4.83951		115698841	1.91964	0.37416	36.2641		115714735	1.79346	4.12113	16.9176		115700243	5.4556	0.0623793	0.0832983
115701432	5.30575	0.0356627	0.0580807		115714669	429.345	1043.93	91.2854		115700920	97.6884	87.8295	16.0738		115709049	0.12017	0.0559923	2.25204		115708224	1.34077	1.58421	12.633		115715486	17.6218	3.8086	0.268979
115707161	3.7226	0.001	1.92781		115714229	36.1218	79.59	7.71512		115711907	12.4684	71.0045	7.25337		115724630	0.120844	0.350243	2.22797		115704818	0.251237	0.001	2.34791		115720967	6.75255	1.85452	0.104489
115699384	77.1131	0.001	0.837137		115720961	21.0624	64.9715	96.7657		115700808	2.47563	13.457	1.39158		115725640	3.76717	0.0395703	3.1843		115707693	0.20021	0.491217	1.86819		115724494	33.2337	3.3006	0.514886
115703115	12.0971	1.38582	0.133603		115700574	65.8165	134.798	14.0835		115720669	42.3738	17.3327	7.01662		115708679	1.31858	0.206278	24.4285		115715659	1.69072	2.62911	15.8202		115716742	3.72353	0.012971	0.0599027
115703792	258.799	0.001	2.89411		115721882	0.460395	2.58209	2.09106		115704804	0.448565	9.74051	2.6899		115711420	2.68253	0.0475793	0.198321		115697887	0.195624	0.534917	1.82214		115695784	2.78241	1.95618	0.0453527
115712063	2.92353	0.001	1.91959		115700650	15.8721	160.299	21.2481		115718919	95.6558	77.0292	15.8501		115720877	0.10799	0.0257053	1.97533		115723013	3.65423	14.3217	34.1776		115706946	241.339	12.7644	3.857
115698706	9.58563	0.10482	0.108937		115716684	14.1731	103.93	13.7898		115723009	6.1779	7.94398	1.02565		115702980	0.041887	0.187926	0.750974		115705875	4.55361	4.15361	42.3053		115709841	13.8454	0.0416403	0.222567
115705297	51.3377	1.24724	0.580898		115708324	557.161	2341.93	310.782		115725109	20.1286	153.217	3.34471		115701200	126.984	3.20847	9.43224		115696836	2.79431	18.7232	25.882		115695910	11.3523	0.118569	0.184072
115703063	16.7207	0.869811	0.189936		115723435	2.67297	6.01453	12.1484		115724539	0.353085	29.2395	2.10979		115721426	2.78744	3.80845	51.0714		115717082	0.990976	0.846381	9.10934		115721045	2.06733	0.001	0.0345013
115700862	4.20212	0.0308023	2.18694		115714134	42.6859	1673.37	193.67		115701578	24.7779	43.1163	4.13105		115697766	19.4105	0.250898	1.45023		115701282	0.188598	0.295002	1.71771		115696869	2.33189	0.0808743	0.0387963
115724983	10.1291	2.21292	0.116535		115701189	3.51342	34.9471	15.9138		115718932	26.9512	170.463	17.7868		115715855	0.927147	0.105713	1.24743		115700594	0.370055	1.08043	3.36379		115715301	4.1284	0.001	0.068069
115697060	2.53551	0.331667	0.0299297		115716795	24.7667	90.8313	5.34466		115708831	5.76747	5.2525	0.969373		115702055	21.7491	0.269571	21.2281		115705863	0.487129	2.84634	4.42984		115722064	13.3475	0.062717	0.218027
115725418	11.5221	0.0770333	0.134619		115725542	80.1741	216.676	362.681		115715813	2.67966	13.3992	1.4026		115697788	20.5306	0.191818	1.57593		115697135	3.01397	8.02352	27.3961		115716990	20.2952	0.150329	0.335517
115720471	3.15186	0.001	0.037891		115719231	11.1179	98.2138	50.2756		115716079	55.4499	323.406	34.0852		115699693	0.33198	1.90283	6.04652		115700445	88.6729	0.144965	804.046		115721015	2.96136	1.95665	0.050119
115721441	6.73795	1.67788	0.0816537		115713111	11.0418	191.364	49.7555		115716284	1.7605	23.9782	2.52945		115706564	2.02825	1.69734	37.0035		115717320	6.38355	1.01214	57.8498		115697885	71.236	50.8067	1.18859
115712177	2.86316	0.0242613	0.03532		115725225	15.4726	56.6157	7.551		115699431	0.547594	10.0582	3.169		115703031	1.62343	7.40252	29.4194		115702662	3.61191	6.34743	32.698		115715914	9.62743	0.001	0.168518
115699396	16.3471	1.50649	0.197981		115721300	4.37578	34.784	4.6473		115707698	20.5677	100.168	10.5753		115707573	0.86522	2.16483	15.5349		115702995	0.454624	0.001	4.09677		115697416	23.1961	0.120845	0.409531
115712911	0.99493	0.0375053	0.001		115716397	15.4745	47.7072	69.6499		115716468	2.36709	23.0817	0.40389		115705860	1.05559	0.721441	18.9401		115708863	0.0480493	1.25484	0.425312		115725677	6.45811	0.060694	0.115437
115724135	35.0254	0.130808	0.426054		115710301	35.9965	371.307	7.84515		115712061	62.3583	80.8256	10.6853		115711617	4.64106	6.18286	83.1732		115698165	2.89775	10.8516	26.0864		115696900	104.971	4.16013	1.88705
115710159	2.4711	0.001	1.89385		115712526	0.996632	6.17671	4.47577		115706892	47.1934	72.6117	8.08995		115711949	12.82	0.001	0.986214		115723453	0.324764	0.001	2.91156		115708786	14.2162	0.001	0.256582
115717388	9.68561	0.119247	0.118562		115709846	3.64697	16.6981	2.24396		115703372	246.465	182.585	42.2561		115714498	3.09391	0.0738643	5.01774		115697825	0.486274	0.21678	4.3423		115706985	9.57387	0.001	0.177878
115706117	64.1076	0.823219	0.79373		115705832	247.139	1065.69	143.299		115718504	53.5951	87.1992	9.18963		115712528	0.351057	0.001	6.26798		115716853	1.84233	8.83185	16.4624		115712817	5.46269	0.57388	0.102587
115714311	2.03961	0.001	1.84461		115725295	905.215	2015.29	198.1		115718918	63.5159	49.4786	10.9105		115724204	8.16934	0.222243	15.0998		115712620	17.0409	73.3542	152.297		115704805	4.22356	0.001	0.079572
115702761	41.2327	0.997873	0.511924		115721064	0.734868	9.50785	3.29471		115707843	1020.13	2247.54	175.253		115722694	3.95611	4.00302	69.6661		115712443	0.832253	1.55551	7.39612		115697141	2.32263	0.026334	0.0443203
115717186	37.514	0.001	0.470048		115718897	3.84686	30.355	17.2323		115718740	13.277	149.159	2.28353		115710026	4.02814	0.093997	6.28488		115700934	6.55576	18.8371	58.1491		115725398	79.6442	1.17259	1.4902
115697758	3.55612	0.115377	0.045543		115700797	4.40206	10.9531	0.975541		115717101	17.7575	41.5164	3.05589		115714958	2.00749	3.79121	35.1396		115714133	3.59155	0.001	31.6852		115709567	17.4488	23.6913	0.327323
115695955	20.9717	0.140402	0.263773		115709267	204.537	661.16	45.2943		115706284	32.6415	139.458	5.62065		115706159	57.9554	81.9975	1014.16		115708861	0.252355	0.079114	2.21573		115723243	7.34167	0.0409297	0.140438
115723302	9.56274	0.588036	0.120905		115706508	559.484	1218.12	123.96		115698980	0.980479	2.54129	0.272659		115711672	32.9007	0.001	2.56399		115716457	1.70839	0.0950797	15.0126		115717159	7.15364	0.0782573	0.137346
115714709	25.0268	0.234297	0.317707		115714073	2.74096	23.0444	12.2504		115711340	11.7947	20.516	2.03644		115707279	3.85763	4.39196	67.2255		115714959	1.26112	12.0437	11.0079		115722430	1.75406	0.0685627	0.0344717
115706696	3.62593	0.001	1.84053		115716986	5.07115	28.7296	22.635		115715784	2.69379	1.48179	0.466702		115705891	0.323576	0.001	5.61848		115714137	1.74164	1.19988	15.1639		115705746	5.20353	0.001	0.101032
115721179	92.9111	0.485298	1.17686		115724169	496.279	1257.21	110.813		115723370	86.8875	74.9823	15.0822		115714244	7.85968	2.74417	136.151		115702454	0.001	0.0868957	1.68432		115720674	4.3392	0.001	0.0850293
115711932	2.63612	0.0215193	2.21411		115721182	11.4436	60.5036	8.3746		115711146	4.4259	4.6323	0.771004		115715331	1.1623	0.0797213	19.9952		115707439	0.112287	14.9105	1.1196		115716063	1.15094	0.0517547	0.001
115696976	6.43929	0.001	0.083186		115700030	106.097	562.03	23.818		115704758	1.59665	9.62841	1.03087		115704439	0.001	0.117239	1.15654		115704867	0.108972	0.790975	0.938417		115723413	11.252	0.0908607	0.219618
115699292	3.84913	1.73657	0.050571		115707716	1.06857	2.56741	4.74482		115722324	78.2737	35.861	13.6551		115725169	0.0957057	0.306248	1.62438		115721804	0.498625	4.80068	4.31897		115710122	51.9569	0.610806	1.02017
115721006	26.7078	0.259931	0.348649		115712086	28.3778	160.573	22.2904		115703068	119.768	86.0581	20.9032		115724084	2.60447	1.89931	44.5228		115725181	13.5152	32.2322	117.104		115712603	56.2227	17.4687	1.11441
115704907	1.31538	0.001	1.82316		115711388	33.2203	202.101	28.0823		115700759	1.99389	29.0719	11.2953		115699008	0.119131	0.001	2.01933		115709482	0.110468	0.0655563	0.945162		115707204	55.4106	0.630643	1.09848
115719616	110.721	43.4025	1.45979		115706831	3.34381	6.70722	14.8234		115702651	47.6403	118.417	8.31776		115703023	1.16651	4.89506	19.8596		115707468	1.15995	0.88175	9.93675		115710129	33.3189	0.099883	0.664895
115706309	7.80841	1.12592	0.103911		115701116	6.94964	52.9979	7.40857		115701095	9.71709	52.2894	5.60041		115714751	36.264	0.001	2.85464		115716854	0.183429	1.02166	1.56495		115702765	18.0412	0.370204	0.362311
115714777	1.9558	0.0172643	0.001		115714383	2.07973	16.7803	9.11587		115697307	120.681	154.587	21.1163		115725342	3.94836	1.11208	67.246		115720793	3.10315	7.22051	26.462		115722432	0.273532	1.77636	0.0418633
115708262	11.1782	2.40921	0.148846		115724183	80.1393	332.097	46.6022		115715658	3.52056	28.988	3.12628		115709085	0.165648	0.001	2.79045		115724608	1.03652	2.05812	8.81609		115708699	10.5784	0.001	0.21307
115699199	1462.18	271.878	19.6003		115714329	0.924481	5.74893	4.04082		115719031	394.698	167.034	69.3172		115716755	2.52468	2.94422	42.7056		115708762	20.5755	21.6703	174.184		115707548	6.33864	0.244873	0.128292
115708791	857.382	0.001	11.6351		115705010	29.5145	62.851	6.68542		115722196	363.844	1005.64	64.0693		115717120	0.56322	0.238459	9.49727		115704373	0.281683	2.91457	2.37566		115696941	7.97025	0.22221	0.161588
115719337	8.81868	0.001	0.121077		115707678	5.97599	27.1661	3.8223		115701190	8.51993	48.0966	5.22412		115715175	0.993153	0.346713	16.7322		115698176	0.309367	2.32914	2.60486		115717562	2.35067	0.0292637	0.0486033
115701418	104.989	2.12385	1.45303		115698979	0.373706	1.70369	1.63056		115718604	0.324869	1.9746	0.215717		115722087	0.1547	0.373893	2.59035		115700547	15.6952	10.494	132.21		115698185	3.77969	2.23869	0.0790173
115706950	156.452	7.53749	2.16666		115707257	3.16261	62.3402	13.8149		115700453	345.062	685.099	60.9269		115701321	14.5454	0.001	1.158		115715667	0.965703	11.5086	8.12676		115705041	2.17644	0.0827123	0.0462197
115711305	1.96981	0.001	0.028268		115719033	133.148	1116.41	157.109		115722629	63.9156	54.6841	11.3028		115714792	3.03275	9.52915	50.7562		115703224	0.282515	2.55287	2.36776		115716884	7.47339	4.79037	0.157978
115698742	1.03668	0.0420273	0.001		115697537	1.47576	16.6112	6.42232		115707282	567.524	1137.67	100.442		115721392	1.50972	0.420057	25.1605		115713399	2.4171	0.001	20.261		115716879	9.80011	1.0671	0.208043
115698729	15.5557	2.94672	0.219332		115698677	0.898943	53.0932	3.91066		115701450	275.289	726.471	48.8588		115701346	22.1646	0.263192	14.6472		115700336	1.08404	0.0834543	9.05293		115708082	7.1504	0.173048	0.152827
115703618	49.539	0.001	0.696362		115704682	1.2885	3.15298	5.60404		115711764	21.1176	23.7353	3.74882		115717452	12.0739	0.12685	6.99868		115715871	0.218915	0.069752	1.82146		115723007	3.15445	3.10938	0.0680313
115724740	5.65322	1.93517	0.0804693		115723332	3.18754	14.7334	2.08152		115713180	0.771058	4.37285	0.484234		115711945	2.30228	0.175162	1.07778		115712775	8.41174	0.69441	70.214		115709473	2.2111	0.001	0.0480987
115697225	54.844	1.46293	0.775423		115709008	3.39453	19.0219	2.68793		115720924	9.04436	102.853	11.3956		115702070	0.0983723	0.436484	1.62418		115724125	1.04159	0.426279	8.66676		115722397	5.59861	1.28879	0.120368
115701423	1.8651	0.001	0.0277317		115711893	35.8386	353.899	50.063		115706852	0.701974	1.3395	0.149374		115712350	1.73833	0.133633	1.02812		115719041	1.81861	0.240599	15.1028		115705083	0.36652	1.82463	0.0432203
115725477	1.25922	0.051603	0.0151603		115713730	4.48616	15.5733	2.2066		115706149	107.502	88.2927	19.2764		115724897	0.202529	0.001	3.33244		115709701	0.335664	0.142183	2.77756		115705180	18.3169	0.437138	0.392486
115720930	29.4511	0.254476	0.423619		115699562	1.89862	10.9952	8.22714		115717003	0.486031	2.55264	0.286382		115722717	101.807	3.19316	8.22234		115714404	10.2066	7.27727	84.3635		115695868	30.9178	0.659155	0.663453
115724623	2.54785	0.001	0.0377257		115697824	31.4426	128.496	18.2367		115715735	1.01405	1.16021	0.183673		115710492	11.8446	0.146381	8.01583		115698628	0.950697	13.0603	7.84599		115712849	21.5158	0.137664	0.464877
115703025	78.9871	0.001	1.14352		115701248	7.85677	59.971	8.55347		115719275	1.01902	83.2629	5.47041		115707478	0.29761	0.001	4.80136		115705313	52.4667	276.412	431.421		115716251	9.75014	0.001	0.211408
115698039	9.05358	0.121047	0.134439		115700549	1.25272	9.43477	5.34882		115712719	12.3932	65.3274	7.3234		115695898	3.47513	0.0581747	3.11722		115721919	10.5977	1.15154	87.1336		115700736	17.5431	0.241115	0.380266
115710150	751.264	1.02055	11.0858		115707565	5.59971	15.1506	1.28865		115722232	23.558	26.1935	4.25063		115698240	25.9963	21.2808	418.489		115714126	11.1296	18.7214	91.3386		115698388	46.9035	19.9525	1.01936
115707418	4.51377	0.554859	0.0676543		115711845	59.5763	145.905	13.7357		115706358	12.2661	9.46669	2.21415		115698596	6.49902	0.184191	9.81818		115722033	0.201181	3.2459	1.64378		115709207	155.36	1.94498	3.38045
115724257	40.8119	0.001	0.605207		115714703	6.94084	17.4568	29.6374		115722407	18.2812	38.3311	3.30354		115716919	2.7835	0.04887	2.55625		115712461	0.427688	0.364302	3.50056		115708117	2.38416	0.001	0.0528433
115706491	35.7449	12.0985	0.534112		115701091	1.41406	10.7313	6.03169		115724689	9.96302	17.4442	1.80417		115708993	0.713509	0.0879157	0.73146		115706859	0.001	0.194445	3.71683		115714784	1.50674	0.072648	0.001
115716405	1.21311	0.050828	0.001		115707399	12.6401	52.1068	7.47572		115697903	18.0581	38.7124	3.27165		115697024	0.121263	0.117068	1.93376		115717483	1.05859	8.77366	8.64451		115707746	33.473	0.526817	0.731239
115705982	1.44883	0.060659	0.0102593		115703911	2.8216	6.09702	0.655355		115714863	57.3305	36.0056	10.3854		115703317	0.0998003	0.441315	1.56599		115723219	0.778265	102.985	6.34899		115707958	16.3084	0.219256	0.358373
115706454	9.20302	1.11286	0.138701		115708836	57.3057	298.061	43.0351		115707841	64.9711	62.8387	11.7955		115719780	7.69844	0.001	121.187		115721754	1.45629	7.5484	11.8789		115715731	5.94216	3.90059	0.13142
115700243	5.4556	0.0623793	0.0832983		115707281	860.545	2201.29	201.543		115713865	28.0702	131.239	14.7409		115705770	16.6294	0.577427	30.1489		115724126	1.18707	0.716654	9.66961		115702768	184.326	1.96293	4.05018
115715486	17.6218	3.8086	0.268979		115706142	17.04	65.7331	9.49335		115704994	6.43552	50.9906	1.17773		115697513	5.78615	18.0569	90.6771		115717863	0.152415	0.46525	1.23215		115704837	3.56655	0.001	0.079735
115720967	6.75255	1.85452	0.104489		115703001	15.7034	46.6703	3.68227		115695587	0.488236	4.89183	0.555162		115700665	3.63476	0.001	55.833		115722205	10.8685	18.1676	88.2679		115720602	4.92167	3.14136	0.109981
115724494	33.2337	3.3006	0.514886		115707875	8.96104	36.6546	5.32522		115703727	82.0226	72.9063	15.0298		115721102	0.830642	0.103776	1.15669		115704803	0.0982057	5.6463	0.787496		115711701	2.54294	0.001	0.0573393
115716742	3.72353	0.012971	0.0599027		115695867	1.58334	4.86583	6.6758		115716580	42.9329	225.193	25.5625		115718799	1.05444	0.131607	1.06285		115711444	0.338375	0.112707	2.72756		115702315	18.3487	1.05185	0.407884
115706946	241.339	12.7644	3.857		115709361	788.912	2318	185.567		115702507	29.27	47.8013	5.3722		115706233	0.559206	0.382791	8.56897		115702049	2.46811	7.05078	19.9041		115721011	4.14535	2.18001	0.093299
115709841	13.8454	0.0416403	0.222567		115709644	13.8715	51.0882	3.2691		115698089	19.8262	9.92259	3.64588		115714708	4.44595	0.169299	67.7001		115708302	1.66159	0.813995	13.3834		115713319	28.5092	0.0758223	0.636022
115695910	11.3523	0.118569	0.184072		115708909	89.0516	252.111	20.9866		115711558	8.21556	15.3562	1.51239		115712514	0.195727	0.279931	2.96537		115725612	7.21337	65.5712	58.057		115714088	220.968	124.616	4.93313
115721045	2.06733	0.001	0.0345013		115705120	11.8816	74.883	10.9476		115707674	1.75316	6.22054	0.323979		115710080	0.422819	0.108227	6.39525		115722393	0.135473	0.383407	1.07975		115724170	1514.08	3.37549	34.2096
115696869	2.33189	0.0808743	0.0387963		115709768	29.4687	66.7438	123.696		115711322	15.6565	76.4776	8.76209		115723418	3.84445	0.308796	2.61324		115698674	1.7454	2.47718	13.9916		115721737	1.98479	0.115361	0.0461743
115715301	4.1284	0.001	0.068069		115714782	2.42744	6.42236	10.1747		115708334	8.07451	36.0997	4.14207		115695892	0.124136	0.102857	1.86576		115704748	0.116689	0.183756	0.928726		115716590	97.5313	0.130393	2.23186
115722064	13.3475	0.062717	0.218027		115699305	20.7445	220.984	32.3347		115704609	8.06169	5.47362	1.48918		115695605	0.148533	0.001	2.23028		115717049	0.335586	2.46985	2.67827		115700897	44.2853	33.2892	1.0234
115716990	20.2952	0.150329	0.335517		115712469	28.9767	195.834	28.6865		115715128	0.001	6.35323	0.73204		115696706	0.162633	0.073261	2.43599		115714331	7.29469	37.1768	58.3356		115699278	28.7243	2.86342	0.67012
115712050	2.48367	0.001	1.79365		115705453	42.8534	503.747	74.2071		115721383	24.7004	20.5156	4.56725		115709286	11.6197	0.236063	11.7693		115699393	18.2593	25.399	145.819		115704833	3.13316	0.001	0.074046
115715914	9.62743	0.001	0.168518		115698825	64.772	144.401	15.42		115724657	2.40727	2.53695	0.44632		115698966	1.76342	1.81594	26.5449		115694961	10.3325	1.29761	82.4631		115720684	36.8232	0.194278	0.862057
115697416	23.1961	0.120845	0.409531		115705156	24.0694	93.0492	13.7186		115724588	9.89656	19.0283	1.83452		115722876	6.62434	0.001	0.545286		115703587	0.512919	3.66493	4.08556		115712533	2.89452	0.001	0.0688887
115725677	6.45811	0.060694	0.115437		115723856	33.5599	236.451	34.8704		115699353	812.048	1473.57	150.475		115699750	11.8247	0.0403203	0.973728		115695606	0.237369	0.001	1.88618		115710127	40.1333	0.252721	0.94965
115696900	104.971	4.16013	1.88705		115710033	18.316	88.6504	13.1295		115711839	41.81	102.852	7.78157		115698141	2.5917	0.210613	1.22729		115712621	12.4478	7.65786	99.1674		115720084	80.0984	0.0182163	1.90353
115708786	14.2162	0.001	0.256582		115707718	2.33474	13.3083	0.560047		115725714	4.83024	50.9662	25.223		115697561	1.09591	0.467267	16.4458		115701238	2.00678	0.001	15.9737		115716543	52.8737	0.001	1.25957
115706985	9.57387	0.001	0.177878		115725384	0.679779	1.83042	2.82148		115706721	1.07775	6.36689	0.737082		115705647	0.805669	0.138529	11.9182		115699364	8.33678	7.27462	66.3067		115702670	5.2031	0.0149493	0.125248
115712817	5.46269	0.57388	0.102587		115720677	8.12798	23.9258	1.95513		115720648	158.057	556.873	29.4966		115709035	1.5986	2.41825	23.5701		115709481	1.22795	3.9177	9.74512		115723284	40.9911	6.12167	0.980631
115704805	4.22356	0.001	0.079572		115706318	14.4262	100.363	15.1376		115697368	153.037	186.739	28.6097		115716166	4.5702	0.164371	7.89495		115710391	9.3978	15.2702	74.4969		115712902	6.37335	0.168612	0.153363
115704760	0.67534	0.0300667	0.938517		115721071	117.166	331.747	28.2269		115716949	109.604	99.8571	20.5396		115717416	8.81162	0.043232	0.732405		115714582	3.62842	1.59781	28.6957		115716756	297.355	0.001	7.12337
115697141	2.32263	0.026334	0.0443203		115713888	0.675009	1.94208	2.7926		115699550	10.6134	9.22844	1.99364		115699505	0.41395	0.001	6.0624		115717484	0.491645	2.78827	3.86877		115707597	4.69009	0.083574	0.11354
115725398	79.6442	1.17259	1.4902		115724662	9.63676	45.3955	2.33096		115707682	28.7456	165.351	19.1668		115715324	3.21813	0.108826	5.13986		115711104	0.310349	0.621106	2.43179		115721856	4.33666	0.635791	0.105737
115723243	7.34167	0.0409297	0.140438		115709630	25.7391	136.465	20.7233		115701498	32.8306	278.152	32.2544		115716965	16.3437	0.647975	1.3624		115699774	0.974191	2.07941	7.64791		115725218	14.9402	0.0623203	0.362183
115722234	4.34355	0.047475	1.72826		115721350	6.73091	24.8482	3.77452		115709575	24.4983	116.141	13.5101		115704978	0.778244	1.12919	11.3988		115708929	0.152646	0.047179	1.18806		115702769	108.47	1.44184	2.6373
115724992	3.12067	0.001	1.72572		115707411	19.5206	79.608	12.1387		115716769	58.1526	118.519	10.9435		115723198	10.1959	3.78875	149.486		115717229	2.61544	9.48317	20.4478		115702426	2.84222	0.001	0.070074
115717159	7.15364	0.0782573	0.137346		115703736	4.51305	74.4034	18.5732		115721008	6.39046	7.82429	1.20339		115715921	0.991046	0.272562	14.4693		115707956	16.1001	16.2191	125.854		115714443	3.26377	0.10325	0.0814703
115722430	1.75406	0.0685627	0.0344717		115710227	28.4049	58.3885	116.713		115713941	45.2283	428.953	50.0351		115710354	4.29223	2.53968	62.6741		115700771	6.22681	1.86158	48.6221		115718545	6.05317	0.001	0.150445
115705746	5.20353	0.001	0.101032		115725088	22.3217	96.8548	14.8091		115722183	23.8843	22.2407	4.4991		115714874	4.1528	0.313393	60.2895		115706511	2.58422	33.2375	20.1312		115714787	66.1206	2.81982	1.63403
115720674	4.3392	0.001	0.0850293		115697314	20.062	186.193	28.4694		115706414	154.246	122.743	29.2798		115697385	2.70946	0.734707	39.0429		115722667	1.36239	1.40296	10.6036		115702417	1.21478	0.0631583	0.0118763
115716063	1.15094	0.0517547	0.001		115725701	23.3069	96.6715	5.69666		115699523	9.27961	5.47398	1.76876		115721366	0.80173	3.62162	11.4656		115700775	4.14174	5.49374	32.2396		115718558	25.6339	0.001	0.634571
115723413	11.252	0.0908607	0.219618		115711342	2.77053	9.3806	11.3764		115711399	6.45571	3.42348	1.23082		115715626	0.418052	1.02345	5.94557		115702982	0.245907	0.221811	1.90719		115716291	17.7972	0.0431667	0.446687
115710122	51.9569	0.610806	1.02017		115697209	1.33581	3.36214	0.515445		115699345	13.2002	59.4601	7.00708		115709103	0.907269	0.563352	12.9102		115720196	0.808573	6.44068	6.28004		115711044	70.911	0.538402	1.78009
115704372	2.51931	0.0289943	1.33501		115715131	0.366921	0.918103	1.50307		115695828	23.035	22.8292	4.39405		115721611	2.802	0.0477897	2.13498		115709632	0.97049	11.1885	7.53724		115706178	134.304	0.58862	3.39583
115712603	56.2227	17.4687	1.11441		115709750	5.32285	13.1431	21.8104		115710567	138.644	1133.49	133.715		115702619	8.97588	0.0562173	0.764709		115697071	0.686987	1.02652	5.32336		115700007	7.12895	0.001	0.183771
115707204	55.4106	0.630643	1.09848		115709252	7.73897	17.9798	31.3369		115717341	1.3507	11.6883	1.38314		115700961	24.5781	7.38793	348.266		115698262	3.73298	47.9478	28.9362		115708926	1.6715	0.001	0.0439323
115710129	33.3189	0.099883	0.664895		115702738	1.84885	12.5312	7.47748		115698181	374.092	354.348	71.522		115716296	30.95	0.500143	2.63527		115715307	1.76687	89.2271	13.6878		115710128	45.3113	0.383567	1.16592
115702765	18.0412	0.370204	0.362311		115716276	90.152	309.324	47.3983		115709848	6.37998	9.11579	1.22202		115711229	36.3499	225.763	513.418		115695708	2.66238	12.5383	20.579		115723901	2.0213	0.0131883	0.0533213
115708699	10.5784	0.001	0.21307		115719491	2.73024	10.7501	11.0373		115719274	7.30819	19.6762	1.40144		115715663	0.956382	1.76891	13.4929		115722498	3.86268	8.8067	29.6663		115724567	51.7004	75.049	1.34017
115707548	6.33864	0.244873	0.128292		115709433	4.13059	16.5311	16.6376		115714263	144.406	88.3294	27.8372		115715146	1.66596	1.96075	23.3639		115725648	9.71363	23.977	74.5506		115723428	60.8232	97.1716	1.5888
115696941	7.97025	0.22221	0.161588		115715937	3.27251	15.2619	2.35321		115725202	41.2616	20.5988	7.95491		115704043	15.249	0.0498037	1.32284		115706270	39.4752	185.109	302.498		115710182	140.661	108.357	3.67362
115717562	2.35067	0.0292637	0.0486033		115712845	1013.83	2869.88	250.586		115697744	2.37946	6.16571	0.45996		115719768	22.7405	0.742329	1.97276		115695990	2.7063	23.513	20.7145		115701324	5.54445	4.37553	0.146347
115710106	2.85306	0.001	1.53786		115718794	7.24618	311.904	29.0201		115695974	16.055	172.2	20.5752		115717193	1.12651	1.82196	15.7725		115701284	4.70041	17.8115	35.9522		115716658	18.0591	6.18819	0.475099
115705041	2.17644	0.0827123	0.0462197		115704893	28.8336	115.061	17.7368		115706229	408.552	590.641	78.8975		115713610	10.4011	3.48561	145.141		115708900	0.713605	2.52231	5.45095		115702505	2.90511	0.001	0.078159
115716879	9.80011	1.0671	0.208043		115712566	389.42	1333.14	96.8348		115706976	10.542	53.2341	6.38732		115724460	0.08555	0.114508	1.17124		115701717	1.3076	1.82066	9.95843		115714406	13.888	0.001	0.372742
115708082	7.1504	0.173048	0.152827		115706440	3.37978	22.1609	3.43858		115712965	2.14257	19.7884	0.417062		115704783	0.142174	0.611707	1.95338		115721861	0.991597	0.104616	7.53221		115705340	6.85756	0.001	0.186015
115709473	2.2111	0.001	0.0480987		115709712	12.994	43.8282	6.80002		115717275	21.08	91.1386	4.12789		115696940	0.390338	0.001	5.36273		115710260	0.373958	0.141461	2.83055		115708949	2.83503	4.51124	0.0777483
115722397	5.59861	1.28879	0.120368		115697843	21.4607	76.2921	84.7699		115697431	13.6621	75.4126	9.10712		115705349	7.61857	0.232798	10.1982		115718089	0.215766	0.001	1.62644		115696958	9.92535	0.001	0.269882
115705180	18.3169	0.437138	0.392486		115719308	8.92172	63.6338	9.91573		115713658	14.0266	13.2312	2.75319		115715218	18.0903	0.459485	20.138		115722688	2.70877	8.50669	20.4504		115699101	6.07965	0.0401723	0.166838
115714763	2.07115	0.0974823	0.222153		115714200	10.4895	49.314	7.74686		115712250	1116.83	2932.78	219.593		115717628	4.74104	32.3885	65.114		115708722	0.350677	0.0163557	2.64025		115716930	39.0169	0.444972	1.06625
115695868	30.9178	0.659155	0.663453		115712234	73.9555	600.107	291.326		115719568	12.1534	6.93889	2.39574		115698673	0.932723	0.316592	12.5788		115701306	0.630717	0.001	4.75367		115719501	257.37	2.52974	7.04944
115712849	21.5158	0.137664	0.464877		115705278	5.68433	31.9287	5.03402		115725293	13.5443	104.688	12.6912		115705896	0.282311	1.30907	3.79212		115709385	0.112474	0.859044	0.841962		115717018	6.40998	0.107648	0.001
115716251	9.75014	0.001	0.211408		115709866	19.8172	78.224	4.99221		115705298	10.6362	6.11813	2.10103		115701206	0.850029	0.206723	11.3868		115712757	0.383329	0.851217	2.88237		115706393	6.17772	0.490163	0.170194
115700736	17.5431	0.241115	0.380266		115717001	4.14445	14.9068	16.2352		115712801	158.472	762.892	92.9349		115698193	0.766451	0.593135	10.2659		115717901	0.755544	1.57503	5.68266		115721814	437.082	4.3516	12.1828
115698388	46.9035	19.9525	1.01936		115720381	1081.91	3791.82	272.565		115708221	0.816202	3.88836	0.474896		115702429	3.52358	0.0537107	0.31161		115708338	1.61205	0.591044	12.0699		115716758	7.48275	0.012194	0.210028
115709207	155.36	1.94498	3.38045		115714433	8.40267	38.9544	2.11843		115696979	8.48654	8.3557	1.68497		115701523	0.604494	1.98944	8.06406		115725392	18.833	148.907	140.986		115715687	11.9956	0.143765	0.336235
115708117	2.38416	0.001	0.0528433		115699070	47.8525	142.278	12.0706		115722394	4.54584	9.70709	0.903894		115717750	12.0107	0.0895653	1.06586		115724603	10.3695	3.6907	77.6068		115717037	2.14594	1.35875	0.0613073
115714784	1.50674	0.072648	0.001		115707589	22.017	185.381	86.2199		115707082	90.0095	742.748	90.972		115703284	1.98869	1.0706	26.5371		115724110	1.96364	15.4991	14.659		115704959	2.37255	0.15137	0.0679917
115707746	33.473	0.526817	0.731239		115705055	29.3133	157.936	25.0479		115722940	74.8005	389.401	47.8115		115711669	0.678437	1.77011	8.99918		115708135	4.28199	0.61955	31.9717		115709921	24.4605	2.33889	0.698609
115712132	1.25099	0.001	1.52326		27215475	1233.67	2532.2	4825.85		115719630	743.814	845.177	148.287		115696927	0.167242	0.379046	2.20422		115699128	0.684514	9.36096	5.09982		115702321	0.85816	0.0470813	0.0911703
115707958	16.3084	0.219256	0.358373		115709211	0.990728	3.47115	3.86779		115712564	1.75215	9.75171	1.1995		115704761	9.54598	0.199485	0.855371		115705484	0.99707	0.158507	7.36826		115709849	140.41	44.8569	4.01767
115702768	184.326	1.96293	4.05018		115706648	29.25	159.561	114.262		115699677	8.56809	11.1631	1.71198		115717529	1.50136	0.001	0.135312		115710103	1.30904	1.34245	9.65586		115695755	9.6667	0.0575017	0.278313
115704837	3.56655	0.001	0.079735		115725156	16.7445	53.6243	8.53599		115714407	2.3796	8.3401	0.476786		115715620	1.06497	1.70781	14.0899		115694846	10.549	84.118	77.8339		115704569	3.03981	0.179411	0.0882097
115697767	1.32979	0.001	1.47271		115715302	9.6717	161.265	37.729		115706724	9.29136	70.0435	8.63763		115697950	0.367227	1.37826	4.83582		115713475	8.73711	4.00227	64.4137		115710699	1.24539	0.0681377	0.118514
115711701	2.54294	0.001	0.0573393		115697049	1.37435	3.02047	5.35796		115710016	9.79947	48.3368	5.97146		115715217	0.811584	0.969594	10.6364		115698755	1.67736	0.965776	12.3126		115719177	11.7937	0.001	0.341531
115702315	18.3487	1.05185	0.407884		115709698	62.3789	172.846	15.7823		115709168	17.5919	12.6538	3.53578		115725032	55.7181	1.77999	73.898		115711298	0.644041	0.462171	4.72347		115708988	1.39181	0.0765303	0.276225
115713319	28.5092	0.0758223	0.636022		115706689	17.6378	97.9094	15.6038		115700326	2.35134	6.20958	0.770026		115698539	0.40229	1.11055	5.22327		115725712	2.26161	14.0347	16.5987		115704526	16.5478	0.795766	0.479715
115715758	1.32964	0.0657897	1.7008		115705625	4.17497	9.15882	16.2378		115699770	25.7668	67.5292	5.18461		115697048	1.02009	0.0457607	1.85397		115696759	0.211753	2.65638	1.54333		115717190	7.07464	1.04273	0.205842
115724170	1514.08	3.37549	34.2096		115704971	31.7392	177.473	28.3676		115702350	48.4941	47.1582	9.7594		115708768	3.06529	0.13709	5.61251		115695768	11.2727	0.0478873	82.4773		115703186	30.4925	0.0602393	0.885523
115721737	1.98479	0.115361	0.0461743		115706470	73.3562	209.643	284.866		115725364	214.46	112.576	43.1911		115707529	2.7714	8.89456	36.0355		115706260	0.367607	9.30638	2.68006		115704567	17.9826	0.001	0.524627
115716590	97.5313	0.130393	2.23186		115711843	437.153	1063.57	111.233		115719266	7.53088	53.55	6.69786		115712018	0.134458	0.372495	1.7307		115713012	6.97288	1.20791	50.9179		115699595	52.326	0.001	1.52473
115699278	28.7243	2.86342	0.67012		115699540	35.1974	194.82	136.506		115716472	70.2812	370.692	46.3731		115708735	0.734934	0.0657227	9.51324		115725363	11.3069	0.0544873	82.5613		115700488	41.4036	7.243	1.21054
115704833	3.13316	0.001	0.074046		115712755	37.706	300.909	48.3808		115716781	12.9546	55.015	2.62227		115708264	1.69747	8.62672	21.9622		115710117	0.616711	0.444886	4.49595		115708772	1.37977	0.0774693	0.18602
115720684	36.8232	0.194278	0.862057		115717377	13.2533	64.8558	10.4458		115705907	357.376	363.663	72.3741		115707153	0.278819	1.51361	3.58703		115722759	1.15086	0.826266	8.37683		115707820	0.984814	0.055624	0.090972
115712533	2.89452	0.001	0.0688887		115700859	2.87327	7.08329	1.14567		115719615	48.5641	471.795	59.2104		115712162	0.27252	0.489507	3.50533		115709911	9.23419	38.397	67.2491		115724861	14.3739	0.446901	0.426369
115710127	40.1333	0.252721	0.94965		115715926	24.6101	162.996	26.3573		115723405	20.5883	38.1298	4.18952		115712267	0.435146	0.433954	5.60253		115719542	7.89672	59.6981	57.4821		115703566	8.41707	5.73474	0.250592
115720084	80.0984	0.0182163	1.90353		115712401	9.50139	51.1355	2.42829		115708726	13.9458	24.3234	2.8441		115718445	0.386952	1.05283	4.96269		115719184	3.59509	0.001	26.1543		115713694	9.24469	0.001	0.277308
115716543	52.8737	0.001	1.25957		115720766	1.7894	8.98178	0.459422		115700524	25.5435	128.697	5.20984		115708974	0.184382	0.212832	2.35001		115697440	0.979106	5.50724	7.11728		115716048	143.212	3.58401	4.28442
115702670	5.2031	0.0149493	0.125248		115702757	23.3394	66.4408	89.7767		115699462	7.11789	5.54267	1.45643		115718535	0.374702	0.0265923	4.77133		115701275	1.31493	4.93536	9.54308		115716550	31.8264	3.95654	0.958217
115723284	40.9911	6.12167	0.980631		115699501	3.93219	11.5439	15.0972		115712741	11.735	57.4491	7.22224		115695674	0.256572	0.030969	3.25791		115696861	1.30298	0.213552	9.45465		115707185	112.661	4.65245	3.39291
115712902	6.37335	0.168612	0.153363		115721329	28.228	106.557	7.29119		115715706	6.56075	21.7236	1.34436		115716418	0.294212	0.0824263	3.7235		115704750	1.61706	1.10056	11.7201		115716885	29.3322	0.131505	0.885223
115716756	297.355	0.001	7.12337		115718292	0.509471	1.68975	1.94538		115715095	98.88	61.6762	20.3127		115708189	4.32678	4.60381	54.8718		115722269	1.24946	4.8694	9.04697		115725040	139.533	2.53619	4.22008
115707597	4.69009	0.083574	0.11354		115724906	0.204979	1.10625	0.996081		115723684	5.14805	107.276	24.8336		115721992	0.184384	0.21055	2.31828		115701290	0.968657	4.16634	7.008		115713754	27.8407	0.001	0.845348
115721856	4.33666	0.635791	0.105737		115707470	0.845164	2.468	3.2252		115697988	7.04814	28.5694	1.45299		115701709	11.8928	0.308211	12.0043		115697354	1.09933	1.89636	7.94767		115708054	23.3304	17.8384	0.712401
115725218	14.9402	0.0623203	0.362183		115704700	0.852152	3.89212	3.24909		115707294	17.7452	122.553	15.636		115701508	7.9962	1.18125	100.013		115713958	3.61208	1.04273	26.0427		115705837	2.92975	0.0296887	0.0903113
115702769	108.47	1.44184	2.6373		115714260	7.96046	25.1669	4.10483		115696956	16.4246	61.0121	3.39362		115700277	0.341028	0.385104	4.24097		115705991	0.147198	1.60892	1.05371		115702734	9.56044	0.001	0.293553
115702426	2.84222	0.001	0.070074		115722454	3.83525	10.5157	0.99536		115708275	40.2412	229.917	29.61		115707034	8.68753	11.474	108.154		115721254	2.59096	2.04944	18.6031		115715100	237.97	20.5677	7.30149
115714443	3.26377	0.10325	0.0814703		115707938	6.92648	21.2462	3.4697		115719525	33.3659	62.5816	6.91235		115715806	4.14439	0.0877667	3.30329		115721198	0.649201	1.06179	4.65147		115713375	111.879	1.38137	3.45078
115718545	6.05317	0.001	0.150445		115715052	0.7473	24.9183	2.82134		115723093	13.9008	27.3177	2.88516		115712572	0.103632	0.04129	1.27805		115721725	0.597391	0.001	4.27827		115722400	3.32857	0.252393	0.103621
115714787	66.1206	2.81982	1.63403		115722520	17.9517	59.4633	67.7749		115721871	0.997765	1.58686	0.206713		115713433	0.548917	0.0783443	1.2046		115710330	3.11945	0.777271	22.3392		115718397	4.9474	0.249312	0.154457
115702417	1.21478	0.0631583	0.0118763		115712729	25.7568	217.184	6.74513		115706192	18.8603	12.4111	3.91702		115716856	0.164703	0.346834	2.02437		115715987	0.23533	0.471711	1.67933		115700335	1.33189	0.0777533	0.001
115718558	25.6339	0.001	0.634571		115719019	50.8259	319.858	52.3937		115714034	32.366	79.7396	6.73669		115708312	119.233	3.65628	133.03		115705216	1.0267	7.53558	7.34576		115699041	1.80102	0.001	0.056941
115716291	17.7972	0.0431667	0.446687		115705395	21.2537	47.2896	5.57865		115699524	14.6807	7.53747	3.05847		115717444	0.830506	0.001	0.0768703		115717173	0.947375	11.0934	6.77243		115722416	2.07521	0.001	0.065814
115711044	70.911	0.538402	1.78009		115719318	9.03329	41.0234	33.8287		115703636	1.84398	4.41039	0.38514		115709282	8.11288	5.78932	100.153		115711102	0.170474	0.545197	1.21226		115709925	18.841	6.91984	0.591134
115706178	134.304	0.58862	3.39583		115720122	1.36234	3.82545	5.09873		115695959	19.6812	17.2145	4.10882		115708930	33.428	9.87964	410.685		115696960	0.289665	0.051819	2.05935		115722765	18.7211	0.001	0.588614
115700007	7.12895	0.001	0.183771		115714578	40.5557	146.618	24.0681		115715057	9.07638	5.20082	1.89747		115699684	15.1531	1.5402	185.916		115716357	1.8233	10.4545	12.9946		115712053	7.84688	5.36112	0.247714
115716904	2.72114	0.0429033	1.2618		115709455	0.723545	12.5514	2.7011		115699460	132.377	100.132	27.7852		115704826	0.218002	0.398378	2.65746		115715704	1.4141	13.1487	10.0548		115714592	389.281	89.7472	12.2484
115708926	1.6715	0.001	0.0439323		115716060	83.6113	387.864	311.96		115718410	9.8079	39.5216	2.06188		115723414	56.1677	0.224878	5.19822		115719254	6.85623	46.2495	48.6913		115716703	41.1781	0.309277	1.30149
115710128	45.3113	0.383567	1.16592		115725696	0.835372	4.42784	2.86219		115706326	25.2271	129.53	16.9583		115709034	20.5686	7.44914	250.911		115704535	0.218411	0.0492337	1.54068		115695638	3.11786	0.622455	0.099543
115723901	2.0213	0.0131883	0.0533213		115715671	1.72948	5.4714	0.906166		115698953	0.24337	2.54402	0.335275		115721894	1.04537	0.248995	12.721		115704555	9.10506	23.2731	64.3925		115711509	4.86422	0.0517183	0.154796
115696847	0.958622	0.0510237	0.606726		115717004	11.4299	48.7367	3.02083		115707975	7.47015	10.9425	1.575		115718652	3.46265	9.68804	42.0968		115701162	31.6379	2.24438	223.629		115713239	5.9779	0.106246	0.190428
115716658	18.0591	6.18819	0.475099		115721369	3.88571	18.6959	3.09989		115699366	62.4576	433.595	57.0877		115701460	1.12321	2.20007	13.5586		115708192	0.255865	0.285688	1.79843		115720685	6.86119	0.001	0.218767
115702505	2.90511	0.001	0.078159		115703931	1.66842	19.0579	6.16205		115707473	1.20863	17.0474	5.64229		115721829	0.750501	2.57612	9.03036		115725233	0.160416	2.47669	1.12377		115715744	15.0995	2.00019	0.481915
115714406	13.888	0.001	0.372742		115708770	3.80988	9.75568	1.0105		115718142	71.3328	174.024	15.1484		115724564	1.75625	0.533855	21.1357		115707797	1.58959	8.07313	11.1784		115712494	12.2088	4.59767	0.390108
115705340	6.85756	0.001	0.186015		115704957	37.0988	97.2289	9.85452		115714669	429.345	1043.93	91.2854		115715591	2.84471	0.091365	3.12522		115697082	0.425167	0.57305	2.98272		115719502	255.813	1.71743	8.18737
115696958	9.92535	0.001	0.269882		115709251	18.2126	507.709	67.0418		115714229	36.1218	79.59	7.71512		115706153	75.406	1.41487	48.8126		115721269	1.68348	10.6133	11.8001		115707033	11.3962	22.0342	0.366544
115699101	6.07965	0.0401723	0.166838		115697299	755.297	1822.09	201.193		115700574	65.8165	134.798	14.0835		115715225	0.7551	0.961812	9.07129		115704768	41.9732	15.2888	294.128		115699432	34.632	0.748257	1.11304
115705047	0.921259	0.001	0.696215		115702326	19.8388	49.878	5.29313		115714820	12.498	13.6694	2.68281		115698308	1.09378	0.001	13.1342		115725662	1.64659	1.67131	11.521		115700837	9.50261	6.05703	0.306238
115716930	39.0169	0.444972	1.06625		115697472	6.67955	18.9785	1.78425		115697275	956.599	1617.41	205.308		115724607	19.531	0.170814	1.83458		115718430	6.64155	5.86954	46.3441		115723320	11.7433	2.14089	0.378984
115719501	257.37	2.52974	7.04944		115723010	9.45642	20.5292	2.52818		115700650	15.8721	160.299	21.2481		115715113	1.0138	1.92383	12.1391		115710012	0.107872	1.26021	0.745596		115698660	21.4396	1.69438	0.69263
115717018	6.40998	0.107648	0.001		115713964	73.6978	249.164	41.7737		115716684	14.1731	103.93	13.7898		115716164	0.51658	1.16213	6.16		115725328	8.46791	7.11867	58.9051		115698645	3.73708	3.44625	0.122052
115706393	6.17772	0.490163	0.170194		115698702	5.35911	13.327	1.4456		115708324	557.161	2341.93	310.782		115723117	2.73807	0.116163	3.90429		115706090	3.68436	5.10854	25.6167		115705315	3.83801	0.001	0.125635
115718570	2.19015	0.0377113	1.40642		115704374	3.4875	7.27878	12.6492		115714134	42.6859	1673.37	193.67		115704968	0.582337	0.444971	6.92763		115715978	0.38322	0.401378	2.65695		115724433	2.17819	0.133741	0.0717493
115721814	437.082	4.3516	12.1828		115718144	1.39971	4.51968	5.05116		115701189	3.51342	34.9471	15.9138		115722337	1.86287	9.16614	22.0986		115705501	0.994671	0.140628	6.89043		115721411	104.128	2.37648	3.38529
115716758	7.48275	0.012194	0.210028		115698287	5.51218	16.4879	1.48795		115716795	24.7667	90.8313	5.34466		115697650	1.50668	0.221035	0.895976		115709071	0.340999	0.0740207	2.35174		115712923	126.143	15.6682	4.10127
115715687	11.9956	0.143765	0.336235		115718993	9.25314	38.2848	6.46144		115702407	50.6309	36.0502	10.9525		115716855	0.923065	3.31746	10.943		115725616	0.323611	0.001	2.22687		115713994	1.40416	0.0265567	0.0466857
115704959	2.37255	0.15137	0.0679917		115714531	2.84621	9.23709	10.2736		115713111	11.0418	191.364	49.7555		115706441	0.935696	4.157	11.0767		115712852	1.34111	0.513249	9.24055		115707844	20.2372	7.00491	0.661755
115709921	24.4605	2.33889	0.698609		115697648	5.23099	12.0735	1.41734		115725225	15.4726	56.6157	7.551		115715890	1.68432	0.17494	1.19049		115697330	16.5667	8.54676	114.177		115723241	3.8952	0.675014	0.129409
115702321	0.85816	0.0470813	0.0911703		115722425	10.8445	82.9863	39.0912		115721300	4.37578	34.784	4.6473		115711150	0.152742	0.001	1.79529		115698860	0.777929	9.49447	5.34812		115713877	1.89988	0.0237857	0.0645273
115709849	140.41	44.8569	4.01767		115695418	0.451151	7.28337	1.2301		115722853	3.29493	3.72145	0.717176		115711304	3.05005	0.07078	0.289443		115696999	0.279425	3.49973	1.90829		115702666	12.3136	0.001	0.413575
115695755	9.6667	0.0575017	0.278313		115709756	15.0337	42.3945	7.16295		115697925	15.3803	18.4179	2.47059		115703610	2.2929	0.240465	1.44047		115712743	22.7919	31.3317	156.037		115697716	12.0796	3.35497	0.406518
115704569	3.03981	0.179411	0.0882097		115714342	2.67154	10.6963	9.62528		115717084	19.5913	13.5644	4.2667		115714543	0.85812	0.25263	10.0647		115698989	4.49654	9.11877	30.7034		115695883	120.397	20.5495	4.04678
115710699	1.24539	0.0681377	0.118514		115715199	4.40498	14.4022	1.1992		115710301	35.9965	371.307	7.84515		115715814	3.86818	0.0991993	3.10711		115704641	0.771398	2.79584	5.26033		115721784	31.2864	1.25126	1.05511
115719177	11.7937	0.001	0.341531		115716536	0.819725	2.04424	2.93982		115719619	16.4453	12.2779	3.58579		115716038	42.2072	0.634081	4.04776		115717384	9.2751	15.6184	63.2615		115718457	7.41404	8.91974	0.251106
115708988	1.39181	0.0765303	0.276225		115704224	103.073	765.404	28.1798		115709846	3.64697	16.6981	2.24396		115700569	2.38522	0.09623	3.00162		115698757	0.232195	0.175894	1.57702		115708694	4.81537	0.943746	0.165222
115704526	16.5478	0.795766	0.479715		115715618	2.59896	6.8818	1.17478		115705832	247.139	1065.69	143.299		115704666	2.40023	0.148626	4.64156		115721974	11.7685	13.073	80.0739		115716295	66.3535	0.183133	2.27357
115717190	7.07464	1.04273	0.205842		115717331	3.54141	33.2016	5.66597		115725295	905.215	2015.29	198.1		115698836	0.367974	0.450931	4.29929		115705630	0.879006	2.87905	5.95849		115718683	3.34406	0.001	0.115668
115703186	30.4925	0.0602393	0.885523		115706712	13.4144	63.7943	3.67251		115721064	0.734868	9.50785	3.29471		115725611	2.818	4.37003	32.6893		115701170	1.65348	26.7325	11.2109		115695780	5.76653	2.85968	0.199609
115713830	0.735226	0.041098	0.769539		115718474	4.4877	16.7156	1.23068		115716187	76.7478	247.465	16.9192		115719683	4.148	0.160493	4.97035		115696842	13.4863	72.4036	91.4707		115722837	131.737	32.7332	4.54302
115724062	0.932917	0.0519073	1.74417		115715771	22.9294	65.7152	6.296		115709414	4.14218	8.53594	1.16389		115694773	3.81738	0.120827	3.7259		115698568	0.207844	0.001	1.40399		115723345	330.028	9.98578	11.4054
115704567	17.9826	0.001	0.524627		115712490	0.731272	1.80007	0.201919		115700797	4.40206	10.9531	0.975541		115702799	2.16133	0.145591	4.48443		115709044	0.349077	2.04394	2.3493		115718963	33.4063	7.18454	1.15623
115699595	52.326	0.001	1.52473		115714215	0.236265	0.793613	0.842718		115709267	204.537	661.16	45.2943		115698546	5.01033	0.001	0.489769		115698314	7.38949	6.63291	49.7612		115702591	1.19855	0.0746153	0.001
115700488	41.4036	7.243	1.21054		115708657	1.77137	5.63402	6.32674		115706508	559.484	1218.12	123.96		115704442	0.142367	0.103008	1.62976		115707181	14.8388	3.37402	99.9109		115697313	27.9785	0.779623	0.97055
115708772	1.37977	0.0774693	0.18602		115720651	11.0905	42.7126	39.5822		115704930	16.0723	29.828	3.5643		115725047	0.267895	0.344155	3.07563		115719363	0.844042	4.09756	5.67731		115704848	1.14723	0.0715707	0.0190463
115707820	0.984814	0.055624	0.090972		115708326	5.70651	39.2272	6.79106		115725519	140.293	90.4172	31.1767		115710254	0.134802	0.231083	1.53783		115713840	43.4465	61.5506	292.272		115704931	8.82428	16.7086	0.306866
115724861	14.3739	0.446901	0.426369		115705613	0.93379	4.80067	2.65266		115723113	26.6902	33.5176	5.9322		115706177	13.5236	8.14403	155.084		115695824	9.92254	15.9064	66.4748		115712389	5.06369	0.213903	0.176594
115719217	0.978163	0.001	0.600475		115709427	5.32058	22.4024	3.88005		115724169	496.279	1257.21	110.813		115712263	0.458619	0.001	5.24534		115698964	4.07525	0.281315	27.2679		115725166	4.97501	6.91326	0.174129
115713694	9.24469	0.001	0.277308		115723182	4.95132	29.9202	17.5879		115721182	11.4436	60.5036	8.3746		115720900	11.8933	0.0538707	1.1644		115714469	0.69587	0.356913	4.64873		115724771	8.36326	0.001	0.293001
115716048	143.212	3.58401	4.28442		115703200	54.8245	286.121	49.7258		115711480	25.7372	29.2005	5.74998		115696852	0.103184	0.0981623	1.1715		115722670	0.865629	7.20316	5.7808		115715979	38.3575	5.58096	1.34153
115716550	31.8264	3.95654	0.958217		115717636	142.11	501.634	87.3573		115709797	122.116	67.8074	27.3556		115712183	0.542824	0.26654	6.20401		115716367	72.7672	40.4331	485.058		115714712	12.5441	0.608636	0.441844
115707185	112.661	4.65245	3.39291		115725480	218.139	483.348	774.701		115700030	106.097	562.03	23.818		115714548	0.404514	2.02336	4.61654		115700700	1.16455	0.090315	7.73321		115700274	4.7383	1.97583	0.167699
115716885	29.3322	0.131505	0.885223		115708667	0.920523	2.62099	3.25316		115705732	197.854	154.641	44.4402		115702729	1.6124	0.179077	1.39175		115720598	7.77465	1.90264	51.6235		115714731	2.72881	0.001	0.0972873
115725040	139.533	2.53619	4.22008		115696845	1.38021	5.02031	4.87385		115696924	6856.15	11312.6	1542.54		115707919	13.3523	6.76553	152.165		115704090	2.07868	2.64021	13.7806		115707374	123.77	4.12055	4.3945
115713754	27.8407	0.001	0.845348		115698535	0.318561	1.61702	1.3842		115712086	28.3778	160.573	22.2904		115706669	1.5903	0.244772	1.52749		115697510	0.590943	0.0688257	3.91068		115720620	75.0978	0.0991553	2.67112
115705837	2.92975	0.0296887	0.0903113		115714799	25.1217	165.886	88.6539		115711388	33.2203	202.101	28.0823		115697384	14.681	0.286908	8.37923		115699499	1.86998	2.01725	12.2902		115698497	10.9276	2.69766	0.39199
115702734	9.56044	0.001	0.293553		115699459	9.30183	21.6775	32.7356		115705724	491.064	417.436	110.688		115723355	1.24965	0.256337	14.1784		115709472	17.9189	134.645	117.373		115718049	24.0691	4.79685	0.870679
115715100	237.97	20.5677	7.30149		115717094	39.0443	85.6122	137.374		115715576	63.4329	73.1857	14.3167		115704610	0.152159	0.546406	1.71223		115695986	0.617377	0.193879	4.03342		115708666	2.41228	0.0426843	0.0884053
115713375	111.879	1.38137	3.45078		115712109	2.65912	7.4403	0.744972		115701116	6.94964	52.9979	7.40857		115721920	1.65769	0.001	18.7157		115699165	0.806972	4.61269	5.2674		115719620	12.6501	8.90314	0.460184
115722400	3.32857	0.252393	0.103621		115704538	0.364835	3.18347	0.558071		115721440	5.36934	3.73215	1.21288		115704899	7.25515	0.103923	2.92434		115696716	0.148519	0.001	0.956621		115703790	4.97246	3.02383	0.181639
115718397	4.9474	0.249312	0.154457		115719763	266.128	581.129	74.7558		115724183	80.1393	332.097	46.6022		115697859	19.1541	0.137874	1.90056		115704205	5.31033	5.76709	34.3843		115715333	30.6806	3.45146	1.11829
115700335	1.33189	0.0777533	0.001		115701239	14.5615	45.9824	8.05451		115705010	29.5145	62.851	6.68542		115714681	0.521367	0.163024	5.87536		115719385	0.265242	0.0390083	1.70803		115717308	18.5981	9.53681	0.679169
115699041	1.80102	0.001	0.056941		115707657	30.2367	67.851	8.51374		115707678	5.97599	27.1661	3.8223		115695540	0.446253	0.0701087	0.838133		115708164	3.61609	2.64882	23.3523		115718695	3.6006	0.0888387	0.13281
115722416	2.07521	0.001	0.065814		115698581	15.5011	44.9769	7.94525		115707257	3.16261	62.3402	13.8149		115724954	8.84677	14.1508	99.3387		115697154	22.6211	3.39101	146.003		115701069	8.11448	1.45731	0.299716
115722765	18.7211	0.001	0.588614		115695443	0.238974	0.971683	0.172534		115719033	133.148	1116.41	157.109		115706695	3.66735	0.0294833	0.36578		115695439	0.232285	2.31361	1.49229		115722213	34.5608	1.13598	1.27492
115703644	0.832182	0.001	0.570732		115706006	0.825892	1.95452	2.88593		115697537	1.47576	16.6112	6.42232		115708293	1.0869	0.169657	1.25344		115700725	7.62535	2.12411	49.1549		115713325	30.8168	1.05519	1.14001
115714592	389.281	89.7472	12.2484		115706253	0.502288	1.54598	0.275989		115698677	0.898943	53.0932	3.91066		115708817	2.33498	0.159879	4.47348		115707911	0.839318	0.001	5.39717		115704622	3.29687	2.70322	0.122984
115716703	41.1781	0.309277	1.30149		115710295	1.17882	5.29777	4.10282		115716232	12.1084	7.35701	2.74772		115702189	16.1826	1.10201	30.8106		115711110	0.404343	0.44944	2.595		115714574	6.78585	2.15849	0.253596
115695638	3.11786	0.622455	0.099543		115706191	23.6844	108.408	19.3835		115712001	12.1542	23.0576	2.76048		115708081	10.1834	0.001	1.01444		115701048	2.17726	1.64559	13.9662		115714895	28.3112	0.78996	1.05887
115711509	4.86422	0.0517183	0.154796		115715944	8.36175	42.0449	9.70559		115716198	30.2664	15.1915	6.87867		115711709	2.2338	0.074733	2.0604		115698967	0.379392	0.386221	2.4175		115716814	29.0553	0.441874	1.08826
115713239	5.9779	0.106246	0.190428		115705299	26.264	132.769	23.8498		115723332	3.18754	14.7334	2.08152		115723574	19.6451	1.02679	219.955		115701723	1.24079	3.93294	7.91835		115702733	11.0812	0.001	0.416593
115720685	6.86119	0.001	0.218767		115715294	33.4422	100.293	18.0296		115699444	78.1534	99.8836	17.8252		115699179	0.378865	0.001	4.22609		115709164	0.269582	0.363559	1.71616		115712352	0.991293	0.065103	0.0303713
115715744	15.0995	2.00019	0.481915		115705325	3.38455	11.3305	11.7005		115709008	3.39453	19.0219	2.68793		115700416	0.464793	1.89896	5.16918		115721809	0.981291	4.20361	6.25328		115708804	17.5096	0.0393283	0.658457
115712494	12.2088	4.59767	0.390108		115705772	0.378293	0.977169	0.176681		115711893	35.8386	353.899	50.063		115702587	1.65703	0.191714	0.981684		115698191	0.813623	0.997894	5.1754		115725400	42.4826	0.114714	1.59854
115719502	255.813	1.71743	8.18737		115696240	19.9003	45.3294	5.71205		115713730	4.48616	15.5733	2.2066		115700873	13.8971	0.365131	9.94038		115720781	0.001	0.228685	2.51309		115724574	24.9837	0.285798	0.943022
115699432	34.632	0.748257	1.11304		115702898	27.9975	120.438	21.7443		115716846	20.8374	22.2386	4.75911		115712197	7.18835	2.40463	79.99		115700273	2.58037	0.414029	16.4215		115706808	47.2742	20.8854	1.78357
115723320	11.7433	2.14089	0.378984		115702632	2.40328	11.9792	8.30466		115697824	31.4426	128.496	18.2367		115702690	5.75139	0.277069	7.45628		115717864	0.164753	0.511966	1.0431		115722440	203.493	5.8529	7.68646
115698660	21.4396	1.69438	0.69263		115701707	3.43434	11.4192	11.8344		115725387	7.77292	6.22343	1.77759		115708874	0.151926	0.001	1.67393		115709980	0.669584	0.535388	4.25263		115725399	49.7484	1.07244	1.8799
115722986	0.948207	0.001	0.55695		115707923	6.55911	20.5844	22.5259		115704537	1.00707	1.02459	0.232265		115701376	23.9277	22.7732	264.427		115722668	0.63305	3.85853	4.01999		115708875	4.53396	0.058375	0.173178
115705315	3.83801	0.001	0.125635		115703656	83.9114	196.515	24.1827		115706986	24.8795	18.6766	5.71989		115707354	969.535	61.6082	1646.04		115718777	2.03511	37.7294	12.927		115707287	2.7658	0.0711313	0.001
115724433	2.17819	0.133741	0.0717493		115725012	9.71611	40.7042	33.3468		115701248	7.85677	59.971	8.55347		115705031	5.84387	0.336396	8.9445		115711162	4.03169	2.76663	25.5888		115713000	14.274	0.001	0.543759
115721411	104.128	2.37648	3.38529		115698884	4.09722	12.0552	14.014		115707565	5.59971	15.1506	1.28865		115694795	1.67335	5.96488	18.1818		115710711	0.223937	1.22383	1.4154		115701093	48.3091	16.0216	1.84359
115712923	126.143	15.6682	4.10127		115700187	1.84478	10.6924	1.93475		115704800	1.88349	3.33818	0.434814		115703643	1.27137	0.200826	0.848622		115708252	0.776421	0.910439	4.91943		115722856	20.4474	0.505278	0.788206
115713994	1.40416	0.0265567	0.0466857		115717092	2.21334	10.9059	7.55902		115711845	59.5763	145.905	13.7357		115707692	5.83026	0.001	63.175		115717130	2.85412	7.33304	18.0636		115717276	16.5227	0.297044	0.637488
115707844	20.2372	7.00491	0.661755		115702332	2.21949	11.1055	4.16373		115707399	12.6401	52.1068	7.47572		115701299	10.7252	0.350254	1.07831		115724093	4.82267	8.44596	30.4697		115702309	457.425	1.13927	17.642
115723241	3.8952	0.675014	0.129409		115718093	3.57888	28.306	5.12397		115703911	2.8216	6.09702	0.655355		115712272	0.225317	0.0892107	2.42553		115717774	0.207234	0.001	1.30188		115709974	9.16827	0.001	0.355395
115713877	1.89988	0.0237857	0.0645273		115701705	1.71469	8.86658	5.84368		115712453	98.5916	65.5856	22.877		115702316	1.59798	0.187084	1.39857		115708767	18.1502	6.00841	114.187		115721009	1.94216	1.31619	0.0760857
115702666	12.3136	0.001	0.413575		115705438	24.2773	67.1186	12.1711		115700494	14.934	12.2208	3.46998		115706407	5.5531	0.001	0.559009		115698077	0.658996	3.42932	4.13572		115711523	2.71941	0.558475	0.106311
115697716	12.0796	3.35497	0.406518		115714921	3.91133	13.4903	13.3224		115722111	1.98152	2.41918	0.461549		115718674	0.389776	0.108147	4.2011		115724465	18.0199	21.7697	113.071		115700898	9.40798	1.35484	0.365733
115695883	120.397	20.5495	4.04678		115702372	36.1111	142.089	10.4902		115706616	2.57899	2.71972	0.60198		115699381	0.399573	0.899137	4.29898		115708285	0.353294	0.130082	2.20968		115714005	13.8665	14.1068	0.540524
115721784	31.2864	1.25126	1.05511		115694757	0.554412	2.09421	1.88424		115708077	8.36779	10.5059	1.95754		115707515	20.2287	24.4325	217.768		115705312	11.4587	5.57459	71.6952		115724136	27.9161	0.826527	1.08775
115708694	4.81537	0.943746	0.165222		115700765	4.13337	15.4416	1.20356		115719500	70.5733	35.9289	16.5149		115724160	0.697704	2.74728	7.49268		115722656	17.4357	27.5167	108.948		115705624	461.413	32.6765	18.0078
115716295	66.3535	0.183133	2.27357		115702949	7.77981	138.08	26.463		115708954	3.52361	7.80334	0.825533		115698916	0.185721	0.0372167	1.98058		115697734	3.21505	2.80215	20.0257		115713036	10.7593	6.51031	0.421529
115718683	3.34406	0.001	0.115668		115716353	65.5189	235.446	19.0824		115718612	2.78003	3.92522	0.56593		115714360	1.00449	0.162007	1.33015		115695668	2.60583	2.14538	16.2212		115701300	17.1205	22.0935	0.672485
115724464	38.8703	0.0768377	41.4002		115716208	95.6691	346.418	27.8648		115708836	57.3057	298.061	43.0351		115721738	1.41709	1.71135	15.103		115707563	3.34397	2.97331	20.7608		115712096	12.57	21.8789	0.494195
115711375	1.16536	0.072165	1.17414		115718564	20.3246	156.911	5.93131		115707281	860.545	2201.29	201.543		115719423	0.595295	1.37075	6.27728		115709007	1.04403	3.70524	6.46858		115709424	25.1708	0.0384807	0.988718
115695780	5.76653	2.85968	0.199609		115718439	0.782013	5.29861	0.969373		115706142	17.04	65.7331	9.49335		115719625	6.82093	8.71602	71.3136		115700949	2.46967	8.24294	15.2887		115695782	1.75782	0.939137	0.0701057
115722837	131.737	32.7332	4.54302		115707196	0.103847	0.512806	1.24188		115705719	152.397	135.241	35.6926		115695896	4.90257	0.257023	6.38678		115716639	7.36474	41.0761	45.5888		115697720	24.2756	0.257917	0.956235
115723345	330.028	9.98578	11.4054		115705972	0.785434	1.99324	2.65809		115703001	15.7034	46.6703	3.68227		115715647	0.826575	2.68858	8.60133		115707132	6.9741	5.33342	43.1378		115715029	8.8404	0.034933	0.348872
115718963	33.4063	7.18454	1.15623		115694953	11.2083	80.7915	14.8058		115707875	8.96104	36.6546	5.32522		115725654	24.1647	0.407488	2.49803		115704601	0.197498	0.0410723	1.21653		115708017	9.87813	0.063618	0.390322
115702591	1.19855	0.0746153	0.001		115719946	3.81602	11.9209	12.8968		115709361	788.912	2318	185.567		115699573	16.1756	1.20701	168.251		115695630	0.630364	0.34019	3.89299		115714202	35.3292	8.38082	1.39626
115697313	27.9785	0.779623	0.97055		115703051	11.0545	38.5993	7.08062		115709644	13.8715	51.0882	3.2691		115719397	4.21347	0.0984543	2.43151		115697107	10.3018	33.0352	63.6297		115714299	4.00225	0.0763693	0.159622
115704848	1.14723	0.0715707	0.0190463		115697324	9.5603	35.8578	2.80624		115708909	89.0516	252.111	20.9866		115721891	0.194814	0.313812	2.01621		115714711	1.02262	6.96755	6.31046		115714645	48.7092	1.02638	1.93297
115712389	5.06369	0.213903	0.176594		115706412	1.10067	5.53692	3.71257		115699383	24.7539	23.1121	5.83778		115700479	6.0401	0.27108	6.69835		115721748	5.93863	0.717983	36.6242		115715752	1.19452	0.0819657	0.146461
115713776	2.28156	0.0533937	0.724281		115707738	150.611	308.033	44.2985		115716732	29.3846	19.016	6.93902		115697512	0.453166	0.001	4.69626		115704151	0.22865	1.78189	1.40475		115719066	28.2383	0.351416	1.13012
115712516	0.912579	0.001	0.541656		115700744	53.223	186.817	15.6616		115697309	97.8366	142.567	23.1261		115711454	1.12049	0.586259	11.5993		115701464	0.99923	1.31701	6.1519		115701793	16.5769	14.8767	0.665882
115724771	8.36326	0.001	0.293001		115701191	2.17032	4.84816	7.3183		115705120	11.8816	74.883	10.9476		115697144	0.206111	0.349874	2.11747		115698488	1.2138	0.533295	7.44162		115698236	1.77607	0.0495873	0.0722293
115715979	38.3575	5.58096	1.34153		115723128	2.22767	17.0202	0.65762		115699305	20.7445	220.984	32.3347		115722580	154.169	0.895276	15.9614		115697615	4.28208	5.70269	26.2496		115698848	8.82252	0.001	0.357688
115714712	12.5441	0.608636	0.441844		115698880	19.3145	93.8694	17.3683		115712469	28.9767	195.834	28.6865		115703562	4.77769	0.107416	2.57912		115708287	0.165106	0.054514	1.00667		115697500	7.12066	6.65475	0.289317
115703069	11.1724	0.262502	12.2135		115700587	26.5356	164.425	30.4391		115721879	8.76347	12.8771	2.08465		115712939	2.77775	4.87628	28.6007		115714025	8.77971	3.06026	53.7008		115709888	3.04731	0.11044	0.125063
115714731	2.72881	0.001	0.0972873		115706667	10.3943	24.3222	34.9227		115722882	49.952	28.6149	11.8882		115712206	1.57342	1.28646	16.1388		115709663	13.3708	102.418	81.5677		115716320	3.15396	2.11386	0.129536
115707374	123.77	4.12055	4.3945		115704418	2.7411	12.7909	2.36956		115705453	42.8534	503.747	74.2071		115724140	44.3598	1.38352	32.8989		115697575	0.448912	0.001	2.73067		115710511	3.2021	0.634593	0.131608
115720620	75.0978	0.0991553	2.67112		115724625	139.069	766.06	142.074		115698825	64.772	144.401	15.42		115697175	0.839677	2.55066	8.59577		115707272	26.259	35.4269	159.709		115709862	687.237	3.00558	28.0676
115698497	10.9276	2.69766	0.39199		115715187	6.00518	14.8951	20.082		115705156	24.0694	93.0492	13.7186		115701485	0.989238	4.04277	10.1124		115713946	7.57449	27.2453	46.0414		115725397	8.09371	0.22705	0.336947
115718049	24.0691	4.79685	0.870679		115701640	6.58664	36.0413	6.69626		115723856	33.5599	236.451	34.8704		115714676	0.394862	0.227567	4.01117		115723794	0.723664	14.5315	4.39368		115706025	6.96548	2.98296	0.29055
115708666	2.41228	0.0426843	0.0884053		115700836	9.96052	61.9531	11.5171		115710033	18.316	88.6504	13.1295		115699297	317.48	2.38485	32.9428		115696837	3.9219	0.661105	23.8077		115714075	26.8196	0.128562	1.11624
115698254	1.76948	0.0436843	1.16162		115699480	36.8802	121.732	22.634		115695667	69.0418	73.4867	16.4951		115699478	0.460685	0.001	4.67878		115725756	9.19879	20.6569	55.841		115725396	70.9015	1.37768	2.95348
115715333	30.6806	3.45146	1.11829		115724610	2.18744	12.1028	0.649498		115707718	2.33474	13.3083	0.560047		115698617	0.187214	0.001	1.88943		115722139	0.452271	1.18822	2.73842		115702778	72.6824	0.95503	3.03037
115718695	3.6006	0.0888387	0.13281		115720804	0.195782	1.80238	0.651204		115700624	71.0805	80.1748	17.0657		115725440	14.0734	49.9262	142.618		115706822	1.28301	0.733373	7.74818		115714528	8.0005	0.870054	0.335417
115701069	8.11448	1.45731	0.299716		115715911	4.27922	12.115	14.247		115720677	8.12798	23.9258	1.95513		115715808	0.147124	0.001	1.46589		115724571	1.86268	0.315402	11.227		115701201	6.65039	0.084343	0.28203
115722213	34.5608	1.13598	1.27492		115709647	14.2348	32.9545	47.3963		115707434	0.483004	1.47059	0.116931		115724122	1.01689	0.681045	10.1783		115703864	3.12576	3.94483	18.8426		115699500	2.87884	0.001	0.122795
115713325	30.8168	1.05519	1.14001		115709873	2.23992	4.78847	7.44026		115706318	14.4262	100.363	15.1376		115706862	25.0765	35.2434	251.112		115698740	2.71819	5.38726	16.3621		115710266	2.64753	0.001	0.113163
115714574	6.78585	2.15849	0.253596		115704022	1.82414	21.7598	6.05246		115721071	117.166	331.747	28.2269		115705423	0.889935	0.0918243	8.9025		115704804	0.448565	9.74051	2.6899		115717662	13.2627	0.001	0.563158
115714895	28.3112	0.78996	1.05887		115719379	35.592	105.473	19.7649		115697444	68.8334	96.7693	16.589		115708872	5.18968	0.646908	5.89381		115716109	3.16458	4.30611	18.9876		115695971	0.533728	2.47675	0.092248
115716814	29.0553	0.441874	1.08826		115708939	3.1368	6.72094	10.3284		115704657	12.7458	10.3108	3.07434		115714623	6.08215	0.0447227	0.637178		115698809	0.44777	0.29598	2.68109		115708001	10.3313	2.11127	0.439255
115702733	11.0812	0.001	0.416593		115701675	1.43543	9.07292	4.71811		115709101	3.71899	5.45891	0.897853		115705859	1.21377	0.39837	12.0699		115703614	11.0577	7.51539	66.3037		115715044	4.47878	0.001	0.191014
115712352	0.991293	0.065103	0.0303713		115716464	1.52566	14.7956	2.79575		115724662	9.63676	45.3955	2.33096		115724658	5.67483	0.211118	4.87549		115724539	0.353085	29.2395	2.10979		115715022	59.1718	1.64922	2.51542
115708804	17.5096	0.0393283	0.658457		115716891	3.05305	10.2484	10.0222		115709630	25.7391	136.465	20.7233		115704049	3.43128	0.221299	33.9507		115720943	0.415903	0.07285	2.48133		115724682	7.5022	3.59461	0.319924
115725400	42.4826	0.114714	1.59854		115706452	6.49646	30.8732	21.2819		115721350	6.73091	24.8482	3.77452		115706168	3.91126	4.14288	38.6507		115695743	3.88385	11.1757	23.2011		115724652	9.02659	0.067332	0.38671
115724574	24.9837	0.285798	0.943022		115708321	9.46126	29.1984	5.52221		115719126	27.5159	14.0679	6.67862		115718433	1.09016	0.001	10.7662		115722968	11.5371	5.9148	68.9172		115721007	19.993	4.164	0.85702
115706808	47.2742	20.8854	1.78357		115707751	2.8009	11.8075	9.15162		115707411	19.5206	79.608	12.1387		115709564	6.5079	5.00252	63.8868		115709264	3.94633	5.09085	23.5229		115722385	6.73424	0.0421513	0.289307
115722440	203.493	5.8529	7.68646		115700962	59.1827	305.781	58.3461		115703736	4.51305	74.4034	18.5732		115718906	3.10044	0.241344	5.46146		115725319	13.5802	157.743	80.879		115701247	305.441	614.153	13.1271
115725399	49.7484	1.07244	1.8799		115714122	65.539	205.497	19.7313		115724756	17.7267	12.1057	4.32469		115714651	0.995354	1.96278	9.73419		115708062	1.64418	0.001	9.77291		115709668	122.768	9.1523	5.28256
115708875	4.53396	0.058375	0.173178		115717835	1.67879	12.0037	2.29303		115725088	22.3217	96.8548	14.8091		115701296	1.187	0.199482	0.653298		115724456	2.01065	3.58365	11.8172		115725580	20.2605	0.001	0.874806
115707287	2.7658	0.0711313	0.001		115705197	18.9777	39.4835	61.7913		115697314	20.062	186.193	28.4694		115721833	0.676529	0.119952	6.61133		115706686	0.540679	1.77043	3.17031		115712386	22.5301	0.348828	0.972875
115713000	14.274	0.001	0.543759		115714167	0.828284	3.61789	0.250814		115725701	23.3069	96.6715	5.69666		115711194	2.5956	0.637403	25.2011		115714911	0.723385	0.59432	4.23885		115715661	10.3928	4.3929	0.44965
115701093	48.3091	16.0216	1.84359		115701414	81.6912	228.178	24.6803		115697209	1.33581	3.36214	0.515445		115713490	0.165944	0.228451	1.60091		115717273	3.64282	8.46601	21.3547		115699314	5.77154	1.11953	0.250364
115722856	20.4474	0.505278	0.788206		115721231	4.83246	12.4533	1.46182		115699121	45.6118	36.7137	11.1767		115722351	9.22083	0.165303	0.975159		115723735	0.552997	0.0174137	3.21949		115703584	26.7626	0.24043	1.15752
115717276	16.5227	0.297044	0.637488		115725331	52.5604	114.274	170.553		115706291	38.4695	74.6084	9.44843		115708841	2.57384	1.93633	24.9081		115707465	1.40639	6.82013	8.19515		115714593	3.25554	0.0827277	0.141837
115702309	457.425	1.13927	17.642		115724834	2.23775	5.76183	7.23171		115716276	90.152	309.324	47.3983		115710082	0.213927	0.704699	2.05877		115700902	25.6397	7.42001	149.476		115716751	24.6061	1.52804	1.06727
115709974	9.16827	0.001	0.355395		115716423	18.6894	38.0577	60.3769		115724137	19.0926	32.2216	4.69405		115706432	4.31219	0.111746	2.43382		115722334	37.818	10.6711	219.352		115720580	78.438	5.6945	3.41537
115711523	2.71941	0.558475	0.106311		115702815	61.1224	189.717	18.5848		115697759	13.8212	12.0916	3.40222		115708840	0.279628	0.200733	2.67869		115699431	0.547594	10.0582	3.169		115709061	102.171	76.1628	4.45567
115700898	9.40798	1.35484	0.365733		115719427	18.0733	89.9821	17.2641		115698780	6.76752	4.02116	1.6725		115710102	0.265069	0.485145	2.52886		115722891	0.638749	0.169408	3.69144		115700504	29.7632	7.42348	1.30036
115724136	27.9161	0.826527	1.08775		115701809	10.857	35.6516	3.30255		115715937	3.27251	15.2619	2.35321		115696914	0.193191	0.511502	1.82993		115721803	0.286035	0.219707	1.64768		115714339	1.73781	0.001	0.0770117
115705624	461.413	32.6765	18.0078		115702623	1.39434	7.11952	4.49449		115712845	1013.83	2869.88	250.586		115715013	6.52186	21.506	62.0351		115695578	4.94756	4.14756	28.516		115708163	4.87933	19.9295	0.21473
115709424	25.1708	0.0384807	0.988718		115723447	4.1433	19.8276	13.3577		115718794	7.24618	311.904	29.0201		115716560	26.9356	14.4178	254.7		115716111	2.88057	0.933046	16.51		115724660	3.46613	0.341885	0.153595
115697720	24.2756	0.257917	0.956235		115707644	46.0015	118.902	14.0693		115704893	28.8336	115.061	17.7368		115704851	8.23174	0.106093	0.892984		115698559	0.265481	0.238809	1.51388		115714076	17.2033	0.0840633	0.75891
115703060	1.09361	0.0746737	0.62888		115698108	130.687	506.75	39.9843		115700671	4.6879	3.44258	1.1603		115698243	4.26817	0.362086	7.8267		115707491	18.7568	58.7068	107.27		115711838	7.59495	8.71442	0.335841
115715029	8.8404	0.034933	0.348872		115701009	19.558	55.9414	10.7708		115717709	15.5415	13.8769	3.85587		115700070	10.8714	0.112627	1.18447		115712026	0.142524	0.038339	0.795005		115716463	4.09247	1.44081	0.181441
115708017	9.87813	0.063618	0.390322		115724840	199.913	453.132	61.2943		115712566	389.42	1333.14	96.8348		115707571	9.6592	0.809504	17.474		115697316	1.63479	0.514998	9.34324		115714078	11.5203	0.022113	0.510079
115714202	35.3292	8.38082	1.39626		115701281	33.6036	92.1461	17.7434		115706440	3.37978	22.1609	3.43858		115703155	3.24278	0.001	0.354188		115721836	1.19438	1.28603	6.82034		115697380	2.03719	0.001	0.0915737
115714299	4.00225	0.0763693	0.159622		115708663	2.60491	8.08566	1.56272		115709712	12.994	43.8282	6.80002		115715781	5.15905	0.226626	4.86837		115724831	0.278649	0.172581	1.58609		115700730	35.6397	20.2342	1.59951
115714645	48.7092	1.02638	1.93297		115722491	278.394	808.404	85.6535		115697673	152.371	148.938	37.9261		115714735	1.79346	4.12113	16.9176		115711262	0.217749	0.0370537	1.23764		115715743	2.93917	0.12458	0.133041
115715752	1.19452	0.0819657	0.146461		115704834	1.01681	9.18092	1.79218		115719308	8.92172	63.6338	9.91573		115704676	2.41179	0.001	0.263937		115721733	1.93985	1.08284	11.0572		115721925	2.405	0.0299783	0.109599
115719066	28.2383	0.351416	1.13012		115708487	6.22274	13.7278	19.953		115702361	90.4144	351.617	22.6526		115697202	21.1424	1.19287	25.5938		115725231	0.230682	3.36708	1.30792		115708026	11.034	12.9498	0.503999
115698236	1.77607	0.0495873	0.0722293		115722270	25.1042	146.691	7.74168		115714200	10.4895	49.314	7.74686		115710611	2.69678	0.195919	4.15804		115706045	1.6346	1.49562	9.28191		115714006	6.25673	7.27635	0.286899
115698848	8.82252	0.001	0.357688		115711410	3.84793	19.1583	3.74544		115712234	73.9555	600.107	291.326		115722445	7.30995	0.203236	4.30211		115697412	2.37679	3.29244	13.4775		115707934	453.399	37.3273	20.7233
115709888	3.04731	0.11044	0.125063		115700638	8.58019	44.515	8.70587		115712932	152.143	82.872	38.1862		115708224	1.34077	1.58421	12.633		115700821	5.27378	2.19557	29.9016		115717353	24.8704	13.5721	1.14674
115694734	0.374825	0.001	14.1307		115708372	6.71897	22.9571	21.4566		115707677	8.71893	8.46348	2.19062		115718808	3.84437	0.001	0.422354		115700759	1.99389	29.0719	11.2953		115695741	2.88735	0.001	0.134133
115710511	3.2021	0.634593	0.131608		115699354	14.976	30.1321	47.8063		115707416	16.513	11.9104	4.14978		115715681	44.8055	0.386011	4.94545		115724553	0.666273	0.920977	3.76245		115721439	3.17637	0.915135	0.147573
115709862	687.237	3.00558	28.0676		115724871	1.93336	11.3718	0.597869		115715111	2.13471	1.32062	0.537287		115704818	0.251237	0.001	2.34791		115707425	4.66479	13.6688	26.3677		115724583	1.08841	0.0800287	0.15541
115725397	8.09371	0.22705	0.336947		115706278	58.0681	177.272	34.7793		115705278	5.68433	31.9287	5.03402		115707693	0.20021	0.491217	1.86819		115725605	0.341638	2.88031	1.92519		115699118	6.6757	0.001	0.30947
115706025	6.96548	2.98296	0.29055		115712709	3.56598	7.43533	1.10853		115709866	19.8172	78.224	4.99221		115715659	1.69072	2.62911	15.8202		115698662	0.425562	0.844607	2.39459		115722417	2.59973	0.001	0.12118
115714075	26.8196	0.128562	1.11624		115705712	4.89663	12.8574	15.5714		115720381	1081.91	3791.82	272.565		115697887	0.195624	0.534917	1.82214		115715741	0.598674	2.25928	3.36679		115723327	14.7807	0.39168	0.686658
115725396	70.9015	1.37768	2.95348		115703002	36.9235	105.408	11.5273		115714433	8.40267	38.9544	2.11843		115723013	3.65423	14.3217	34.1776		115712644	0.562591	0.766593	3.16221		115714607	4.63307	3.35262	0.21714
115702778	72.6824	0.95503	3.03037		115725443	1.82875	8.19662	5.79351		115699070	47.8525	142.278	12.0706		115724111	165.978	5.12407	18.4465		115710887	0.862703	1.32084	4.84267		115707103	3.1717	1.30474	0.149692
115714528	8.0005	0.870054	0.335417		115725170	3.27544	60.7689	10.3538		115707589	22.017	185.381	86.2199		115708343	8.12711	0.001	0.905033		115708940	0.212895	2.1252	1.19062		115705334	12.3716	0.431175	0.581781
115701201	6.65039	0.084343	0.28203		115707927	13.6803	65.1689	4.27768		115705055	29.3133	157.936	25.0479		115705791	2.68437	0.001	0.299617		115719622	1.65305	5.51209	9.26986		115703954	4.1285	14.8655	0.194857
115699500	2.87884	0.001	0.122795		115718945	13.9218	48.9172	9.62064		115697165	10.3599	17.6052	2.61539		115705875	4.55361	4.15361	42.3053		115697904	0.684387	1.0511	3.83458		115704913	1.07447	0.0800833	0.0135663
115710266	2.64753	0.001	0.113163		115714523	20.6473	72.0393	14.1786		115717423	5.07354	23.1902	3.68341		115717082	0.990976	0.846381	9.10934		115699151	14.6011	12.1456	81.8934		115718744	24.7475	0.0899777	1.16492
115717662	13.2627	0.001	0.563158		115705258	0.558845	2.52828	1.7638		115725156	16.7445	53.6243	8.53599		115701282	0.188598	0.295002	1.71771		115697008	0.505363	0.001	2.8271		115696981	25.2088	3.59007	1.18686
115708001	10.3313	2.11127	0.439255		115721418	4.1416	10.5915	13.0787		115715302	9.6717	161.265	37.729		115702915	8.58882	0.184879	0.958624		115703032	0.568482	1.79369	3.1806		115711944	16.1834	0.0291807	0.762628
115715044	4.47878	0.001	0.191014		115699098	15.2809	38.1622	48.256		115709698	62.3789	172.846	15.7823		115705762	12.4744	0.001	1.39628		115695722	1.89369	2.60455	10.6029		115721707	1.97625	0.826905	0.094075
115715022	59.1718	1.64922	2.51542		115712060	27.648	83.7631	16.5028		115706689	17.6378	97.9094	15.6038		115714554	1.98171	0.136864	2.80359		115718550	0.680998	0.184889	3.80761		115714282	84.059	4.0178	3.97329
115724682	7.5022	3.59461	0.319924		115716339	4.08744	14.7741	12.8732		115704971	31.7392	177.473	28.3676		115700594	0.370055	1.08043	3.36379		115715768	0.133141	0.847898	0.739559		115722032	2.49346	1.2197	0.119143
115724652	9.02659	0.067332	0.38671		115698003	19.7175	51.1646	10.1152		115707598	98.1338	115.542	24.8727		115697135	3.01397	8.02352	27.3961		115709642	1.51691	0.304803	8.45971		115724640	19.3248	5.59044	0.918075
115721007	19.993	4.164	0.85702		115724360	1.50759	4.45718	4.74551		115721252	10.6476	7.90742	2.70612		115700445	88.6729	0.144965	804.046		115712335	1.27107	0.001	7.08575		115725041	7.88133	0.148778	0.376107
115722385	6.73424	0.0421513	0.289307		115713039	18.954	38.6995	5.96936		115724090	2.78528	3.60378	0.709155		115717320	6.38355	1.01214	57.8498		115724778	1.20546	0.0667617	6.71666		115706175	104.24	5.09828	4.97706
115719748	1.84747	0.001	0.370225		115710164	0.488283	1.07408	1.53093		115705680	2.97118	4.43458	0.756693		115702662	3.61191	6.34743	32.698		115721141	1.93686	4.47875	10.7839		115719393	6.63571	0.183695	0.318138
115709668	122.768	9.1523	5.28256		115724729	1.4055	5.20501	4.40874		115711843	437.153	1063.57	111.233		115707174	87.2867	2.34913	47.8879		115710207	0.884851	2.43518	4.91899		115724432	11.027	0.159516	0.528647
115725580	20.2605	0.001	0.874806		115708738	12.9339	26.3143	5.21656		115712755	37.706	300.909	48.3808		115702995	0.454624	0.001	4.09677		115716225	0.404695	0.001	2.23778		115710251	20.0055	0.17851	0.959101
115712386	22.5301	0.348828	0.972875		115697505	8.3277	23.1922	4.61183		115708828	25.2059	19.3066	6.41573		115698165	2.89775	10.8516	26.0864		115720160	1271.14	2387.1	7004.07		115708153	41.1201	0.24955	1.97233
115699314	5.77154	1.11953	0.250364		115697918	10.806	46.524	3.42146		115717377	13.2533	64.8558	10.4458		115723453	0.324764	0.001	2.91156		115724873	0.472279	1.9899	2.59595		115720594	6.04613	7.86598	0.290974
115703584	26.7626	0.24043	1.15752		115701704	3.82493	12.2809	11.9829		115700859	2.87327	7.08329	1.14567		115712502	121.94	5.90494	118.724		115712124	1.04665	0.287998	5.75555		115725291	12.2442	0.0429147	0.588337
115714593	3.25554	0.0827277	0.141837		115713105	0.336898	6.10787	1.22373		115715926	24.6101	162.996	26.3573		115697825	0.486274	0.21678	4.3423		115699679	0.631106	0.154192	3.46671		115705239	10.3432	3.27391	0.499037
115716751	24.6061	1.52804	1.06727		115699502	2.47151	7.05638	1.41402		115712401	9.50139	51.1355	2.42829		115722995	2.56985	0.126391	2.51794		115722896	10.2082	24.4956	56.0798		115711646	9.55069	0.28869	0.461394
115720580	78.438	5.6945	3.41537		115712254	0.415515	1.37373	0.133232		115720766	1.7894	8.98178	0.459422		115709568	1.93233	0.001	0.219501		115695661	4.08005	10.3965	22.3547		115723075	2.04794	0.064644	0.100549
115719749	2.43527	0.001	0.365779		115712688	4.89786	9.84818	15.2562		115716714	30.5607	28.0199	7.85757		115712620	17.0409	73.3542	152.297		115716920	0.328209	0.0627147	1.7885		115706483	29.0494	1.09729	1.41683
115700504	29.7632	7.42348	1.30036		115721278	19.4475	53.4539	60.5691		115697611	37.8724	20.417	9.74573		115712443	0.832253	1.55551	7.39612		115724798	0.208796	0.177565	1.13577		115711929	188.484	21.4669	9.23219
115714339	1.73781	0.001	0.0770117		115704727	2.94099	7.84715	1.58078		115721329	28.228	106.557	7.29119		115701397	351.057	1.56362	39.791		115699923	0.273191	0.776224	1.48603		115706132	3.22097	0.0531103	0.160138
115724660	3.46613	0.341885	0.153595		115715650	27.8333	64.4147	8.90242		115714260	7.96046	25.1669	4.10483		115699420	10.8672	1.02672	20.5128		115704244	0.166852	0.312472	0.904295		115720678	5.06965	0.001	0.251535
115714076	17.2033	0.0840633	0.75891		115700712	15.7218	49.6968	48.7484		115722454	3.83525	10.5157	0.99536		115700934	6.55576	18.8371	58.1491		115724531	0.616636	0.235895	3.35055		115707494	5.05305	0.0488463	0.251254
115716463	4.09247	1.44081	0.181441		115714924	2.25103	12.5271	2.52865		115716280	8.10689	13.4404	2.10832		115714133	3.59155	0.001	31.6852		115725053	7.18807	66.6193	39.0836		115698030	84.8947	31.9344	4.21999
115714078	11.5203	0.022113	0.510079		115707433	14.1033	30.8061	43.6543		115707938	6.92648	21.2462	3.4697		115698798	7.3437	0.585013	11.6626		115714513	0.779374	0.245528	4.19767		115715749	2.892	0.001	0.144876
115697380	2.03719	0.001	0.0915737		115716623	9.67619	29.4565	29.9042		115715052	0.7473	24.9183	2.82134		115704529	8.28983	0.146132	2.88981		115705023	0.545805	1.4728	2.93437		115698589	3.54319	0.001	0.177313
115715743	2.93917	0.12458	0.133041		115700067	150.89	305.682	466.065		115725311	152.416	244.223	39.8621		115708861	0.252355	0.079114	2.21573		115700952	32.5264	17.1281	174.813		115706187	2.64411	0.001	0.132822
115721925	2.405	0.0299783	0.109599		115712925	51.6505	152.847	16.8076		115714550	5.10509	7.83505	1.33612		115716457	1.70839	0.0950797	15.0126		115699514	1.44164	1.10492	7.74277		115707106	3.15234	0.001	0.158419
115709116	1.23734	0.0905473	0.892872		115709943	27.2497	124.24	25.329		115712729	25.7568	217.184	6.74513		115719000	18.8441	0.0370363	2.16645		115719275	1.01902	83.2629	5.47041		115722415	16.7605	1.44033	0.839853
115708823	0.857163	0.063013	0.459933		115706303	1353.22	3699.71	440.721		115712669	131.812	104.222	34.5363		115708674	5.02013	0.429365	8.40222		115716343	0.306993	2.26229	1.64313		115724451	6.61483	0.001	0.335035
115707934	453.399	37.3273	20.7233		115725644	1.18233	3.98225	3.64358		115719019	50.8259	319.858	52.3937		115711696	23.9581	0.613217	12.0052		115712813	9.76469	10.4187	52.3721		115722414	12.2989	1.25953	0.622374
115695741	2.88735	0.001	0.134133		115695660	59.6496	154.328	31.5194		115705395	21.2537	47.2896	5.57865		115714137	1.74164	1.19988	15.1639		115699273	1.90521	0.632337	10.2118		115699054	68.1847	1.06764	3.45783
115721439	3.17637	0.915135	0.147573		115695287	8.61592	52.2711	10.6994		115723625	2.91452	3.63581	0.766152		115702454	0.001	0.0868957	1.68432		115714900	0.935102	0.89319	4.99812		115711381	6.59719	0.036433	0.336399
115724583	1.08841	0.0800287	0.15541		115706979	1.46092	4.74549	4.50206		115714578	40.5557	146.618	24.0681		115720540	16.2309	1.00681	19.6962		115718829	3.12253	0.13356	16.6913		115716945	13.0716	0.268271	0.66885
115713741	0.730995	0.0540567	1.8596		115708099	8.82291	59.5054	12.1827		115709455	0.723545	12.5514	2.7011		115698954	0.368411	0.067348	0.743608		115716356	1.06588	8.63856	5.69402		115712735	19.24	0.001	0.988009
115699118	6.6757	0.001	0.30947		115724089	9.57812	20.575	29.4986		115705026	38.1915	61.8752	10.0554		115715645	6.68185	0.316226	0.773197		115702381	0.750867	0.032497	4.0087		115705261	8.73307	0.001	0.449314
115722417	2.59973	0.001	0.12118		115719303	12.0693	43.2598	8.86522		115696879	667.786	1288.12	176.073		115718869	53.4232	2.42216	47.4101		115699702	1.31873	0.141348	7.04145		115709592	4.82074	0.0594687	0.249146
115723327	14.7807	0.39168	0.686658		115697596	1.02006	10.086	2.06844		115717971	1.60845	1.84871	0.425168		115709667	178.263	4.35344	20.6412		115722782	2.11658	0.728334	11.2944		115716673	107.246	11.5905	5.52565
115717427	0.893234	0.139207	32.3962		115721178	8.32246	61.8201	2.73667		115715671	1.72948	5.4714	0.906166		115714211	8.99733	0.381419	7.32773		115714632	1.47863	7.29979	7.88875		115702964	37.1851	0.0890387	1.91835
115707103	3.1717	1.30474	0.149692		115715579	34.5238	137.129	11.356		115717004	11.4299	48.7367	3.02083		115725181	13.5152	32.2322	117.104		115703417	20.279	27.9848	108.166		115700800	6.46179	3.18399	0.33431
115705334	12.3716	0.431175	0.581781		115712511	13.4375	30.8661	41.2459		115711967	51.4981	72.5426	13.6351		115709482	0.110468	0.0655563	0.945162		115719259	17.395	1.97418	92.6946		115701151	28.3519	0.480972	1.46694
115704913	1.07447	0.0800833	0.0135663		115698775	0.720303	2.45382	2.20686		115721369	3.88571	18.6959	3.09989		115707468	1.15995	0.88175	9.93675		115722797	11.4571	4.2226	61.0126		115722370	7.26126	0.0276327	0.376759
115718744	24.7475	0.0899777	1.16492		115722116	6.56863	18.1155	20.1292		115703931	1.66842	19.0579	6.16205		115720793	3.10315	7.22051	26.462		115700747	3.06256	9.29336	16.2675		115712828	327.968	152.225	17.0313
115696981	25.2088	3.59007	1.18686		115705912	9.37292	18.7499	28.7195		115708770	3.80988	9.75568	1.0105		115724608	1.03652	2.05812	8.81609		115721202	1.61789	0.321567	8.58786		115714504	3.84476	0.0375867	0.200623
115711944	16.1834	0.0291807	0.762628		115708713	1.83466	4.91957	5.61289		115714313	16.9907	12.2218	4.50665		115698626	7.42341	0.156687	0.86521		115712233	10.4442	52.7288	55.406		115721850	23.0865	1.52355	1.20446
115714282	84.059	4.0178	3.97329		115716252	1.23176	12.0063	3.76611		115705262	20.0957	13.5489	5.33279		115708762	20.5755	21.6703	174.184		115715589	3.30016	5.4776	17.4565		115705374	6.27	1.84521	0.3283
115724640	19.3248	5.59044	0.918075		115695607	0.906613	4.17623	3.62827		115704957	37.0988	97.2289	9.85452		115710226	473.368	0.069776	55.2771		115717376	17.1167	47.3215	90.3499		115698764	1.38429	0.370864	0.0733867
115697054	0.950192	0.001	0.342977		115706156	10.7657	44.3821	3.5742		115709251	18.2126	507.709	67.0418		115717403	2.76764	0.0464187	0.325167		115714479	124.636	449.716	657.869		115694711	3.02079	0.013213	0.159057
115725041	7.88133	0.148778	0.376107		115714717	4.73767	19.2194	14.3936		115697299	755.297	1822.09	201.193		115724653	10.1912	0.383164	1.19655		27215490	3.81642	6.27101	20.0692		115704708	2.20908	0.020357	0.116963
115706175	104.24	5.09828	4.97706		115722455	4.32914	10.0862	1.44793		115702326	19.8388	49.878	5.29313		115717110	1.35277	0.106322	1.98421		115707920	20.4063	24.1631	106.946		115711996	136.105	1.22879	7.17021
115719393	6.63571	0.183695	0.318138		115706369	14.425	32.6656	4.83395		115697472	6.67955	18.9785	1.78425		115707401	5.69903	0.049946	0.670407		115724068	13.5679	17.4825	71.0611		115704807	2.8747	0.171591	0.15317
115724432	11.027	0.159516	0.528647		115698810	0.308326	1.40352	0.0963447		115723010	9.45642	20.5292	2.52818		115698312	3.43707	0.001	0.406412		115715128	0.001	6.35323	0.73204		115722790	464.415	3.71693	24.66
115710251	20.0055	0.17851	0.959101		115712007	19.5735	41.731	6.566		115702383	4.98008	6.14916	1.34003		115700547	15.6952	10.494	132.21		115719032	0.765047	1.56501	4.00243		115704880	60.7459	32.1388	3.23315
115708153	41.1201	0.24955	1.97233		115696992	103.053	509.404	34.6152		115707994	47.0313	76.0517	12.6691		115702747	6.1594	0.496373	9.12731		115719860	20.9712	40.8629	109.777		115698585	7.94298	2.18533	0.42408
115716830	0.992345	0.0754643	1.45463		115721703	5.41511	13.1348	16.3759		115713964	73.6978	249.164	41.7737		115721778	11.7431	0.394584	7.24254		115695604	2.02732	12.7858	10.5901		115704832	0.853613	0.0689143	0.0621973
115725291	12.2442	0.0429147	0.588337		115695048	1.2304	4.66837	3.71886		115698702	5.35911	13.327	1.4456		115716411	0.802544	0.15025	1.49234		115718371	0.001	0.286566	1.05228		115722960	28.8561	41.8082	1.54059
115705239	10.3432	3.27391	0.499037		115723440	10.2005	23.1551	3.42944		115716803	12.635	7.50029	3.40882		115723029	167.72	8.22782	150.905		115719603	14.4122	4.88664	75.2999		115708136	18.1816	19.1734	0.971641
115711646	9.55069	0.28869	0.461394		115698721	30.8614	98.3934	10.399		115698287	5.51218	16.4879	1.48795		115696310	54.8648	1.64368	30.088		115725714	4.83024	50.9662	25.223		115700704	12.2551	0.386523	0.659647
115723075	2.04794	0.064644	0.100549		115716451	142.54	569.789	120.004		115696948	7.85297	24.0463	4.05121		115713399	2.4171	0.001	20.261		115718954	2.42535	21.8053	12.6595		115694739	9.41567	2.7302	0.507596
115706483	29.0494	1.09729	1.41683		115713952	12.1156	66.2643	4.0882		115718993	9.25314	38.2848	6.46144		115706835	13.1879	0.001	1.59234		115716186	2.54806	0.391314	13.2724		115713030	2.77724	0.001	0.150625
115711929	188.484	21.4669	9.23219		115695603	0.128116	0.57865	0.739025		115697648	5.23099	12.0735	1.41734		115705033	12.284	1.18128	21.5715		115704949	0.348881	0.37981	1.81224		115712842	3.35864	0.001	0.182352
115706132	3.22097	0.0531103	0.160138		115699430	0.394744	60.4355	1.18811		115722425	10.8445	82.9863	39.0912		115725780	13.4049	0.732613	1.6314		115706211	1.14497	0.66788	5.95538		115712372	2.85267	3.87304	0.155228
115720678	5.06965	0.001	0.251535		115722760	0.684444	4.78317	1.00877		115695418	0.451151	7.28337	1.2301		115699516	95.1304	3.03971	55.4003		115707156	9.94323	16.1328	51.7017		115716979	3.69805	0.001	0.201265
115707494	5.05305	0.0488463	0.251254		115709801	9.18836	45.56	9.64702		115709756	15.0337	42.3945	7.16295		115700336	1.08404	0.0834543	9.05293		115705806	0.620535	1.93025	3.21848		115698773	15.292	38.2771	0.829616
115698030	84.8947	31.9344	4.21999		115697467	5.72847	33.4615	1.95289		115718974	23.9497	21.0198	6.50021		115715871	0.218915	0.069752	1.82146		115720529	2.98089	2.17875	15.4637		115714604	8.66266	0.001	0.471081
115715749	2.892	0.001	0.144876		115702667	131.971	330.408	70.3338		115711449	1.54176	1.22766	0.419858		115723376	9.73084	0.001	1.18835		115705916	0.96442	0.443069	4.99501		115709566	90.667	34.5881	4.92549
115698589	3.54319	0.001	0.177313		115712697	3.14626	14.2299	3.74178		115715199	4.40498	14.4022	1.1992		115723381	5.7832	0.119517	0.707135		115696521	0.17486	0.565833	0.899252		115710230	2.68165	2.26016	0.146671
115706187	2.64411	0.001	0.132822		115715161	1.10422	4.44564	0.378796		115704224	103.073	765.404	28.1798		115712775	8.41174	0.69441	70.214		115699694	64.7956	207.25	334.507		115702797	1.74735	0.0716527	0.0569197
115707106	3.15234	0.001	0.158419		115716712	30.48	74.0723	10.4452		115715618	2.59896	6.8818	1.17478		115724125	1.04159	0.426279	8.66676		115714132	3.39831	0.182986	17.5276		115698840	2.63908	0.097822	0.144603
115698217	2.41719	0.61623	83.202		115699215	0.735455	3.41156	0.727945		115717331	3.54141	33.2016	5.66597		115719041	1.81861	0.240599	15.1028		115713069	9.44274	21.1964	48.6303		115698651	3.40422	0.001	0.186351
115722415	16.7605	1.44033	0.839853		115713266	15.8596	74.3364	15.8688		115706712	13.4144	63.7943	3.67251		115704680	1.39388	0.264435	1.17907		115698812	26.6367	62.8094	136.841		115715183	35.5396	9.37684	1.94247
115724451	6.61483	0.001	0.335035		115704897	17.4096	73.4378	5.99741		115700192	3.61141	3.27797	0.989701		115694767	155.895	0.653039	19.0663		115701353	117.651	164.079	603.718		115718530	2.02181	0.001	0.111506
115722414	12.2989	1.25953	0.622374		115720572	1.89054	8.71276	5.6416		115718474	4.4877	16.7156	1.23068		115709701	0.335664	0.142183	2.77756		115699780	0.404014	2.00369	2.06529		115725060	217.422	543.807	11.9045
115699054	68.1847	1.06764	3.45783		115705323	39.8693	192.867	41.2976		115717397	2.95928	1.69792	0.812794		115721157	9.08586	0.191618	1.11476		115716289	1.14593	0.215748	5.86355		115698573	12.5774	8.69344	0.69057
115711381	6.59719	0.036433	0.336399		115705220	17.9489	39.2464	6.21928		115715982	0.548606	1.01287	0.173813		115714404	10.2066	7.27727	84.3635		115700928	8.03013	3.79655	41.0941		115716054	4.53609	0.001	0.249802
115716945	13.0716	0.268271	0.66885		115700337	5.96498	17.5893	17.7102		115715771	22.9294	65.7152	6.296		115702373	3.97118	0.302048	5.39401		115696832	0.931555	1.84313	4.7594		115701266	4.89675	0.001	0.270459
115712735	19.24	0.001	0.988009		115725315	10.0718	22.0436	29.8833		115712490	0.731272	1.80007	0.201919		115706083	11.3991	0.759254	13.5464		115706776	4.56106	3.03367	23.3048		115718723	16.8248	1.741	0.932082
115696865	0.954984	0.074711	1.07785		115703215	49.5981	108.247	147.012		115696846	9.06799	17.405	2.4968		115708744	5.99048	0.486475	8.6399		115723531	3.01618	2.08313	15.3742		115703590	11.7156	0.312806	0.649777
115705261	8.73307	0.001	0.449314		115699380	8.48527	20.2984	25.1321		115699415	8.66311	7.97756	2.38804		115706494	16.4686	0.0821083	2.02962		115708405	2.33249	4.77805	11.8751		115721431	24.7156	0.74391	1.37151
115709592	4.82074	0.0594687	0.249146		115711609	13.2081	72.9946	15.7212		115714153	22.1572	36.6927	6.12377		115721919	10.5977	1.15154	87.1336		115698854	0.29516	2.10128	1.49569		115701469	256.121	12.7265	14.2252
115716673	107.246	11.5905	5.52565		115704012	30.4172	88.3331	10.6043		115704770	50.4204	95.9214	13.9577		115714126	11.1296	18.7214	91.3386		115705845	0.817755	2.05573	4.15104		115724189	5.03706	0.001	0.281631
115702964	37.1851	0.0890387	1.91835		115700219	16.5752	69.0652	14.8871		115708326	5.70651	39.2272	6.79106		115710396	4.46429	0.695057	2.51208		115706626	3.82352	3.82689	19.4181		115715120	64.1001	0.001	3.57947
115701151	28.3519	0.480972	1.46694		115708897	63.0145	172.25	22.0095		115709427	5.32058	22.4024	3.88005		115698258	2.19786	0.001	0.274317		115698943	11.5912	49.2919	58.8448		115704163	8.85011	0.001	0.495992
115722370	7.26126	0.0276327	0.376759		115725651	1.31373	3.35392	0.459776		115703200	54.8245	286.121	49.7258		115712461	0.427688	0.364302	3.50056		115696133	1.29831	6.0516	6.58587		115719105	136.202	11.0123	7.63649
115712828	327.968	152.225	17.0313		115705536	29.5002	59.7338	87.0275		115717636	142.11	501.634	87.3573		115706085	7.73214	0.534133	9.39168		115708070	0.195819	1.00914	0.986453		115712850	60.0704	55.0339	3.36951
115714504	3.84476	0.0375867	0.200623		115699386	10.8441	38.202	3.79666		115706826	67.8868	58.4914	18.9935		115706859	0.001	0.194445	3.71683		115702596	12.3968	30.8288	62.7022		115703914	15.8968	2.99026	0.892441
115721850	23.0865	1.52355	1.20446		115705435	41.3358	179.95	39.1383		115712109	2.65912	7.4403	0.744972		115706421	352.492	0.27178	43.992		115720584	0.78397	1.01978	3.95319		115703615	14.788	1.48411	0.8312
115705374	6.27	1.84521	0.3283		115714093	5.5633	37.608	16.3951		115704538	0.364835	3.18347	0.558071		115709626	2.30107	0.203472	3.53933		115706235	0.327431	0.001	1.64781		115705237	3.60417	0.038178	0.203576
115698764	1.38429	0.370864	0.0733867		115705882	57.9431	165.829	36.0757		115719763	266.128	581.129	74.7558		115715330	6.78661	0.210183	0.850594		115701456	0.854819	1.29	4.3052		115714610	4.94767	2.55339	0.279688
115694711	3.02079	0.013213	0.159057		115725247	23.9005	54.4951	70.4064		115701239	14.5615	45.9824	8.05451		115724126	1.18707	0.716654	9.66961		115718081	0.516888	0.180935	2.59612		115705219	6.21823	0.15386	0.3517
115704708	2.20908	0.020357	0.116963		115707772	5.13761	26.0217	1.80418		115709359	389.968	365.564	109.716		115717863	0.152415	0.46525	1.23215		115720724	5.43298	15.6654	27.323		115719466	7.8248	0.0954307	0.44677
115711996	136.105	1.22879	7.17021		115723330	28.1288	68.3441	14.9255		115714175	28.2245	27.24	7.942		115722205	10.8685	18.1676	88.2679		115706110	2.8568	2.16694	14.3607		115725572	18.9393	0.465121	1.08081
115704807	2.8747	0.171591	0.15317		115709610	32.912	81.918	96.6992		115707657	30.2367	67.851	8.51374		115711444	0.338375	0.112707	2.72756		115718720	0.630297	3.40711	3.16469		115718398	5.52385	0.248678	0.316521
115722790	464.415	3.71693	24.66		115707093	0.84536	3.71413	1.8881		115698581	15.5011	44.9769	7.94525		115702049	2.46811	7.05078	19.9041		115713766	0.481904	0.94711	2.41845		115704819	2.37196	0.001	0.136688
115706329	20.8355	0.042863	11.6514		115716692	16.1446	45.8408	47.405		115700461	147.289	136.314	41.571		115708302	1.66159	0.813995	13.3834		115710554	8.41807	18.7313	42.2474		115707305	6.69272	0.242012	0.384649
115698585	7.94298	2.18533	0.42408		115708428	3.24029	10.0705	9.51061		115695443	0.238974	0.971683	0.172534		115725526	7.13823	0.469387	7.9879		27215496	5.06992	15.6501	25.4141		115707446	23.9384	0.125749	1.37386
115704832	0.853613	0.0689143	0.0621973		115703236	10.7902	34.7119	7.58531		115723292	73.4601	44.2693	20.7747		115703642	26.0259	0.844469	14.2873		115699764	4.1476	4.01708	20.7546		115725571	6.12416	0.0928923	0.353019
115700704	12.2551	0.386523	0.659647		115716412	2.69507	9.15643	7.89687		115706478	352.811	354.156	99.9189		115698674	1.7454	2.47718	13.9916		115714683	4.59913	0.653499	23.0093		115707393	1.57817	0.0564693	0.091677
115694739	9.41567	2.7302	0.507596		115705903	6.38345	15.2526	18.6852		115706253	0.502288	1.54598	0.275989		115704748	0.116689	0.183756	0.928726		115701107	9.91003	37.6163	49.5694		115702452	3.2682	0.001	0.188887
115713030	2.77724	0.001	0.150625		115723429	1.9733	6.7968	1.48975		115725666	4.13392	2.96699	1.17421		115719005	1.7154	0.277113	1.08556		115711014	0.607192	0.480708	3.02892		115724701	16.7548	1.78087	0.966714
115698071	0.776946	0.0634377	0.106809		115713072	31.4619	100.931	22.1704		115699553	116.388	203.353	33.0433		115699393	18.2593	25.399	145.819		115725522	21.9425	35.8613	109.588		115704873	4.99364	0.90589	0.288881
115712842	3.35864	0.001	0.182352		115717352	4.46974	21.247	4.66932		115706191	23.6844	108.408	19.3835		115712814	20.1994	0.483712	8.00109		115722818	0.774072	0.045754	3.85906		115711400	5.15695	0.001	0.298486
115716979	3.69805	0.001	0.201265		115716292	39.3347	97.6143	14.022		115695838	33.4369	39.5063	7.09131		115698911	92.4353	0.645603	11.6371		115706736	4.72562	14.8296	23.559		115712274	3.9755	2.05015	0.23139
115714604	8.66266	0.001	0.471081		115719453	22.7208	56.9685	66.2562		115705775	11.0243	9.62688	3.13392		115694961	10.3325	1.29761	82.4631		115702739	1.16965	8.35085	5.81272		115725626	6.33741	2.57386	0.368444
115709566	90.667	34.5881	4.92549		115695842	2.50301	10.4604	7.26788		115723165	73.3672	117.744	20.9032		115718020	3.70408	0.360995	5.9031		115720703	1.24392	5.82695	6.17769		115720672	1.47444	0.001	0.0866473
115702797	1.74735	0.0716527	0.0569197		115716083	7.50382	20.3053	4.48435		115705299	26.264	132.769	23.8498		115702677	5.9802	0.475952	7.76205		115706709	4.06113	12.6852	20.1407		115715119	11.9581	1.49237	0.696795
115698840	2.63908	0.097822	0.144603		115722157	6.74405	33.0589	2.42734		115715294	33.4422	100.293	18.0296		115707428	16.1068	0.86454	14.0836		115708349	1.18852	1.0315	5.88909		115720710	43.0767	1.20506	2.5102
115698651	3.40422	0.001	0.186351		115699678	19.7326	123.283	27.2847		115705772	0.378293	0.977169	0.176681		115723426	2.41612	0.24103	3.90849		115699161	42.2637	114.182	209.461		115709321	4.98845	0.092421	0.291705
115715183	35.5396	9.37684	1.94247		115709544	2.59169	12.1475	2.68993		115696240	19.9003	45.3294	5.71205		115695606	0.237369	0.001	1.88618		115719573	5.75583	24.3601	28.4199		115715096	12.7109	0.882872	0.742014
115718530	2.02181	0.001	0.111506		115704992	1.43826	2.99302	0.66393		115702898	27.9975	120.438	21.7443		115710739	1.29064	0.105981	1.70859		115705838	12.354	22.8352	60.9869		115713183	80.6992	4.54258	4.71691
115699453	4.10966	0.001	127.525		115723068	0.619885	3.1124	1.79449		115700564	20.4868	17.197	5.89367		115712621	12.4478	7.65786	99.1674		115720604	9.65422	3.94677	47.6264		115718599	63.0035	238.772	3.68506
115716054	4.53609	0.001	0.249802		115710268	14.1643	32.5411	40.9882		115708751	62.2652	40.0283	17.9241		115709461	3.3694	0.001	0.428024		115719686	10.2533	0.856406	50.5246		115697879	11.0334	0.680799	0.649208
115701266	4.89675	0.001	0.270459		115695794	29.5889	93.0365	20.7404		115703656	83.9114	196.515	24.1827		115701238	2.00678	0.001	15.9737		115725538	2.10402	1.40846	10.3612		115712943	1.56785	0.036767	0.093292
115718723	16.8248	1.741	0.932082		115711602	5.88982	17.9455	17.0164		115712068	2.69955	2.24515	0.781018		115699364	8.33678	7.27462	66.3067		115699908	19.483	85.8526	95.9504		115710333	90.1777	9.4019	5.33629
115703590	11.7156	0.312806	0.649777		115697639	117.573	312.565	69.7213		115708272	11.1613	8.83242	3.22786		115709481	1.22795	3.9177	9.74512		115707307	12.1609	17.6108	59.6836		115714793	272.221	10.1446	16.1281
115703601	0.637646	0.053635	1.13277		115701050	141.779	531.178	118.671		115700187	1.84478	10.6924	1.93475		115710391	9.3978	15.2702	74.4969		115695670	1.97621	4.37384	9.69381		115712996	10.7401	0.413797	0.63731
115721431	24.7156	0.74391	1.37151		115705626	19.5149	41.9128	56.1729		115718093	3.57888	28.306	5.12397		115714582	3.62842	1.59781	28.6957		115712151	1.48636	1.86745	7.28376		115715242	24.2014	0.001	1.43764
115702516	0.492812	0.0417727	2.36065		115716733	6.52603	90.1043	18.7789		115705438	24.2773	67.1186	12.1711		115706886	15.299	0.208086	1.98174		115707592	11.0363	18.1937	53.962		115725222	14.6423	0.13352	0.87156
115701469	256.121	12.7265	14.2252		115699690	11.2035	26.3526	32.2331		115700794	16.4027	19.4849	4.75173		115711294	11.7149	1.00321	15.8082		115697301	8.22652	2.51677	40.1164		115725099	8.79785	0.138427	0.526479
115724189	5.03706	0.001	0.281631		115722900	25.6498	88.1709	19.7035		115702372	36.1111	142.089	10.4902		115699774	0.974191	2.07941	7.64791		115701719	1.25632	4.04356	6.11596		115723213	26.1654	0.001	1.56469
115715120	64.1001	0.001	3.57947		115695655	55.0626	150.054	19.9883		115700765	4.13337	15.4416	1.20356		115714466	9.40615	0.001	1.22913		115709293	4.17238	5.18323	20.3165		115716971	2896.01	7825.35	173.229
115704163	8.85011	0.001	0.495992		115712119	35.1303	110.679	24.8503		115702949	7.77981	138.08	26.463		115708929	0.152646	0.047179	1.18806		115705617	11.6913	33.225	56.9329		115724684	14.5516	5.91302	0.872997
115719105	136.202	11.0123	7.63649		115706125	35.8193	74.028	16.7254		115707142	161.823	272.507	47.1021		115717229	2.61544	9.48317	20.4478		115697293	3.58785	10.4874	17.4146		115714849	8.57877	1.31084	0.516492
115703914	15.8968	2.99026	0.892441		115712598	2.33498	5.45693	6.69972		115716353	65.5189	235.446	19.0824		115716407	26.98	0.625419	3.52419		115697573	0.403139	0.001	1.95145		115699596	3.07691	0.17711	0.186301
115703615	14.788	1.48411	0.8312		115725657	7.70414	34.2326	7.75239		115716208	95.6691	346.418	27.8648		115707956	16.1001	16.2191	125.854		115706836	3.85947	11.0134	18.7092		115724784	10.0449	2.65596	0.606265
115706501	18.9679	2.28247	588.435		115712506	54.176	130.534	29.6347		115718564	20.3246	156.911	5.93131		115716159	2.39333	0.097203	1.49513		115697164	3.71845	11.7843	18.0061		115715885	2.6634	0.001	0.161684
115705237	3.60417	0.038178	0.203576		115709363	18.8136	54.8851	12.4762		115718439	0.782013	5.29861	0.969373		115700771	6.22681	1.86158	48.6221		115708942	0.515412	2.4311	2.48727		115722464	6.17948	0.166248	0.374835
115705219	6.21823	0.15386	0.3517		115720621	54.7684	192.231	43.7509		115707286	59.4038	115.958	17.3706		115705733	7.30974	0.11905	0.962837		115723684	5.14805	107.276	24.8336		115704432	2.16363	0.001	0.132224
115719466	7.8248	0.0954307	0.44677		115701465	13.7626	96.2975	21.9348		115694953	11.2083	80.7915	14.8058		115720702	7.73284	0.403813	6.23921		115713181	4.5461	8.17024	21.8818		115704480	6.04064	0.111857	0.367616
115725572	18.9393	0.465121	1.08081		115699632	9.21857	34.045	26.3979		115703051	11.0545	38.5993	7.08062		115711379	12.9909	0.42754	6.60193		115725154	0.345487	0.704582	1.65652		115695352	3.13407	0.001	0.191312
115718398	5.52385	0.248678	0.316521		115717309	14.775	71.2749	42.262		115722786	6.58142	6.89677	1.93151		115706345	5.76502	0.001	0.762371		115709447	0.290558	0.0134797	1.39183		115700539	44.3733	1.07723	2.70018
115704819	2.37196	0.001	0.136688		115715124	4.21097	11.1453	12.0199		115697324	9.5603	35.8578	2.80624		115722667	1.36239	1.40296	10.6036		115701712	0.986855	3.32399	4.73195		115706913	5.54927	0.032711	0.33896
115707305	6.69272	0.242012	0.384649		115723244	8.25617	50.8904	11.6406		115725094	109.52	88.1249	32.1537		115700775	4.14174	5.49374	32.2396		115714293	0.757987	0.149281	3.63079		115721032	4.45465	0.001	0.272441
115707446	23.9384	0.125749	1.37386		115707452	16.5111	48.5046	6.08966		115707738	150.611	308.033	44.2985		115718760	12.4691	0.796505	12.235		115712283	8.4827	5.47306	40.6691		115697853	291.893	132.721	17.819
115715166	0.806803	0.0692317	0.413292		115703767	0.835293	4.33807	0.993166		115700744	53.223	186.817	15.6616		115722833	5.30537	0.408125	6.24262		115702531	5.13811	2.04188	24.63		115699153	18.4258	0.657243	1.12603
115725571	6.12416	0.0928923	0.353019		115712179	50.3939	201.435	46.1329		115697867	37.9734	33.4664	11.182		115702982	0.245907	0.221811	1.90719		115712365	6.20318	1.44742	29.7199		115718900	4.05337	0.001	0.248706
115707393	1.57817	0.0564693	0.091677		115708199	6.50775	19.7878	4.54017		115723128	2.22767	17.0202	0.65762		115707045	3.77028	0.223293	3.39902		115714245	0.36194	0.083741	1.7269		115697525	6.04766	0.092637	0.370814
115710343	0.281287	0.001	8.54841		115709299	59.5425	283.962	65.1717		115708685	2.70965	2.13609	0.800174		115697071	0.686987	1.02652	5.32336		115701158	0.995013	0.001	4.74794		115724637	9.38571	0.001	0.575742
115702452	3.2682	0.001	0.188887		115706164	0.21812	1.28908	0.617547		115698880	19.3145	93.8694	17.3683		115709859	5.69566	0.470952	7.1776		115725560	0.611118	0.294049	2.91167		115722336	23.3835	2.63678	1.43305
115724701	16.7548	1.78087	0.966714		115694676	53.7864	820.257	19.952		115700587	26.5356	164.425	30.4391		115702726	13.5428	0.279984	1.80296		115713651	14.3651	17.5805	68.5022		115710746	2.53428	1.09562	0.156152
115704873	4.99364	0.90589	0.288881		115705077	25.4802	85.3879	72.3159		115700590	9.40672	17.0161	2.78083		115697475	5.31575	0.674922	10.2526		115719016	0.304381	0.263212	1.44749		115712107	1.61349	0.0204387	0.100187
115711400	5.15695	0.001	0.298486		115715680	8.62746	75.8546	24.4561		115704418	2.7411	12.7909	2.36956		115723144	31.9704	1.10043	16.721		115698284	10.5335	51.1078	50.2135		115695882	70.7896	13.1045	4.38042
115725626	6.33741	2.57386	0.368444		115713788	159.176	1058.13	59.1073		115724625	139.069	766.06	142.074		115699904	25.984	3.05143	46.1152		115698152	3.06308	0.404047	14.5928		115712997	46.9247	0.001	2.90533
115695514	0.838994	0.0733283	0.288444		115709388	46.5155	116.532	131.582		115714340	19.8683	14.5257	5.87878		115722498	3.86268	8.8067	29.6663		115705728	1.15882	0.869116	5.506		115714631	2.88567	0.102315	0.179625
115699159	2.06526	0.093935	0.44774		115716757	1.04916	12.9147	2.96448		115701640	6.58664	36.0413	6.69626		115708827	2.70512	0.279984	4.20996		115712240	0.609447	0.001	2.89156		115708148	6.84977	0.20783	0.425129
115720672	1.47444	0.001	0.0866473		115714183	4.36394	200.299	12.3291		115700836	9.96052	61.9531	11.5171		115723032	7.94364	0.0618923	1.06019		115706122	1.76873	0.001	8.38949		115722094	1.15712	0.107055	0.103493
115715119	11.9581	1.49237	0.696795		115708766	4.45439	15.7203	1.65897		115699480	36.8802	121.732	22.634		115713494	0.437712	0.0914773	0.576033		115705355	1.25569	4.60401	5.95092		115701582	6.41748	2.40216	0.398542
115720710	43.0767	1.20506	2.5102		115718472	23.3248	50.017	65.8592		115724610	2.18744	12.1028	0.649498		115725648	9.71363	23.977	74.5506		115712175	0.44773	1.53224	2.11614		115704175	5.08452	0.001	0.318161
115698752	12.3598	1.07218	5.86841		115712594	9.0044	34.3299	7.89314		115715207	5.22918	3.62907	1.55478		115719644	5.3157	0.588725	8.811		115724851	1.02648	5.55129	4.85258		115714351	11.7888	16.4157	0.738871
115709321	4.98845	0.092421	0.291705		115723286	2.25869	9.54871	6.37066		115717359	13.0253	38.1443	3.89014		115700641	4.6894	0.298926	4.46501		115705039	0.32656	0.001	1.53923		115705341	7.67876	0.001	0.48189
115715096	12.7109	0.882872	0.742014		115708183	9.97816	29.9643	6.89746		115704022	1.82414	21.7598	6.05246		115710195	22.0351	0.099263	2.95645		115708417	2.68646	8.3149	12.6681		115707489	18.986	0.701496	1.19417
115713183	80.6992	4.54258	4.71691		115716767	23.96	176.747	40.6971		115710643	2.66831	3.16554	0.798407		115704199	2.23001	0.293009	4.3577		115718981	10.5728	13.4846	49.7146		115711970	5.97518	0.125346	0.376589
115712540	220.688	0.724622	152.632		115711954	18.7585	62.3752	14.408		115713406	14.0781	12.9176	4.21523		115701284	4.70041	17.8115	35.9522		115707481	9.18664	11.8765	43.0932		115697791	13.6828	0.0940243	0.863684
115724530	1.89973	0.088833	2.31405		115719040	267.442	909.9	100.02		115719379	35.592	105.473	19.7649		115708900	0.713605	2.52231	5.45095		115719516	0.418467	1.47748	1.9579		115705036	3.67689	11.3831	0.235003
115697879	11.0334	0.680799	0.649208		115722248	23.1774	70.3513	16.3496		115712969	0.997439	0.972772	0.299651		115701717	1.3076	1.82066	9.95843		115698515	8.54834	7.59357	40.0222		115722411	53.9348	25.4016	3.43959
115715915	1.1746	0.103511	0.233332		115715837	12.7608	41.797	9.72333		115703484	25.8006	19.934	7.73962		115721861	0.991597	0.104616	7.53221		115698690	0.987272	0.743992	4.61441		115715720	6.77958	0.337565	0.4334
115707696	6.17716	0.0167363	3.2474		115718490	12.5324	28.9074	6.76737		115697222	12.1792	15.8358	3.6568		115710260	0.373958	0.141461	2.83055		115711977	16.8049	4.20614	78.5913		115705365	15.7297	0.11034	1.00506
115712943	1.56785	0.036767	0.093292		115717164	58.2562	224.886	21.8324		115716464	1.52566	14.7956	2.79575		115702519	2.55298	0.251406	3.70543		115704882	7.66951	43.8157	35.8646		115710062	4.12727	0.001	0.265653
115710333	90.1777	9.4019	5.33629		115702780	82.1071	362.345	30.7943		115708321	9.46126	29.1984	5.52221		115718089	0.215766	0.001	1.62644		115708908	6.11374	0.715715	28.5707		115712099	10.6034	0.001	0.001
115714793	272.221	10.1446	16.1281		115707951	79.6563	338.975	79.678		115700962	59.1827	305.781	58.3461		115713079	111.594	3.19153	15.1238		115707473	1.20863	17.0474	5.64229		115706443	1.94648	5.05249	0.125786
115712996	10.7401	0.413797	0.63731		115715664	0.0657173	1.48675	0.350271		115714122	65.539	205.497	19.7313		115701222	2.1484	0.001	0.292669		115711860	0.776116	1.38836	3.61919		115703053	4.73179	0.001	0.304714
115715242	24.2014	0.001	1.43764		115703561	1.59678	4.96635	1.16963		115717835	1.67879	12.0037	2.29303		115722688	2.70877	8.50669	20.4504		115705787	2.6417	4.02175	12.3166		115705362	405.066	65.5559	26.1535
115725222	14.6423	0.13352	0.87156		115704857	38.4781	82.4629	107.575		115714167	0.828284	3.61789	0.250814		115708722	0.350677	0.0163557	2.64025		115700893	4.25709	17.8874	19.8208		115705351	5.17872	0.522263	0.335429
115725099	8.79785	0.138427	0.526479		115723359	12.955	49.4916	11.6645		115701414	81.6912	228.178	24.6803		115713054	0.764431	0.162017	1.11819		115718688	74.4419	62.243	346.458		115721954	19.9724	3.88781	1.29194
115700486	0.612748	0.055604	1.03423		115707945	7.00487	20.9688	4.94643		115721231	4.83246	12.4533	1.46182		115717012	2.51701	0.141601	0.343898		115722011	1.28241	1.59554	5.9473		115716530	8.13898	0.0519783	0.530361
115723213	26.1654	0.001	1.56469		115694744	25.1622	111.524	9.4596		115724474	86.9734	160.714	26.3054		115701306	0.630717	0.001	4.75367		115698620	0.942549	0.61738	4.3674		115709204	186.445	8.88482	12.1594
115709056	0.80987	0.0733097	0.963951		115707112	24.6208	79.5401	68.8011		115721126	180.676	128.484	54.8794		115724118	4.38157	0.148098	0.601023		115707298	0.457412	0.515565	2.11014		115701287	4.37637	0.0567067	0.286644
115724684	14.5516	5.91302	0.872997		115696458	0.001	1.04451	0.001		115702815	61.1224	189.717	18.5848		115724127	16.1873	1.03248	15.0457		115705554	0.926706	5.4098	4.26789		115714862	11.7694	0.340272	0.770236
115714849	8.57877	1.31084	0.516492		115721180	3.80802	38.7008	1.43738		115719427	18.0733	89.9821	17.2641		115712757	0.383329	0.851217	2.88237		115706247	1.3013	1.80875	5.98907		115698904	1.17355	0.113757	0.060345
115699596	3.07691	0.17711	0.186301		115709971	77.5364	179.164	42.351		115701809	10.857	35.6516	3.30255		115712070	1.70698	0.190893	2.76402		115709153	5.42044	1.62792	24.9133		115699742	11.7078	0.075317	0.767129
115724784	10.0449	2.65596	0.606265		115706963	1.66807	28.2332	4.65375		115723417	118.41	161.538	36.0912		115703647	1.41026	0.300387	1.42552		115720961	21.0624	64.9715	96.7657		115722431	0.569576	1.75111	0.0780643
115715885	2.6634	0.001	0.161684		115724470	22.236	64.231	8.39634		115707644	46.0015	118.902	14.0693		115717901	0.755544	1.57503	5.68266		115722973	5.84968	2.2437	26.8515		115722728	32.8401	0.001	2.15605
115722464	6.17948	0.166248	0.374835		115718890	0.001	1.06412	0.210034		115698108	130.687	506.75	39.9843		115708338	1.61205	0.591044	12.0699		115713472	0.209586	0.001	0.958142		115700841	17.2016	0.846655	1.13283
115704432	2.16363	0.001	0.132224		115716744	1.16504	4.59191	1.08671		115701009	19.558	55.9414	10.7708		115695654	18.9997	1.22602	2.61134		115724974	11.4833	6.17193	52.6571		115697782	4.428	0.0748417	0.293751
115704798	3.05737	0.0289953	5.03376		115698933	8.15646	22.5371	22.7317		115698675	2.40016	4.46175	0.859888		115701393	3.45777	0.001	0.4761		115715684	44.9979	23.3496	206.037		115722342	9.96103	0.198462	0.661573
115704480	6.04064	0.111857	0.367616		115709910	195.747	560.68	74.0524		115724840	199.913	453.132	61.2943		115711391	5.46796	0.178622	2.58272		115705267	3.63992	1.80202	16.6534		115704023	3.11546	0.191967	0.208018
115695352	3.13407	0.001	0.191312		115714010	59.8074	543.169	166.255		115701281	33.6036	92.1461	17.7434		115711998	4.28533	0.052037	0.59043		115714217	15.9999	1.0545	73.2078		115701510	17.8047	3.15353	1.1871
115700539	44.3733	1.07723	2.70018		115705482	3.22754	8.67498	8.9592		115708663	2.60491	8.08566	1.56272		115724603	10.3695	3.6907	77.6068		115718516	1.61914	1.16598	7.40379		115719357	45.9299	6.26749	3.06231
115712315	1.32882	0.120526	0.669241		115709934	7.58974	17.7853	21.0564		115706429	1.64659	2.28788	0.50678		115708135	4.28199	0.61955	31.9717		115712198	4.2445	5.34111	19.3985		115698747	2.26017	0.001	0.151737
115706913	5.54927	0.032711	0.33896		115707749	26.681	124.683	73.9607		115694735	0.979895	0.556306	0.094254		115711982	2.89146	0.122476	1.75504		115721712	7.2261	11.7316	33.0156		115725234	2.10478	0.001	0.141946
115707813	2.19424	0.0587473	64.1516		115721965	6.12231	48.269	11.4914		115722491	278.394	808.404	85.6535		115705484	0.99707	0.158507	7.36826		115721937	1.66721	0.937295	7.60714		115716207	35.8522	0.166653	2.40626
115721032	4.45465	0.001	0.272441		115705017	4.37298	10.0057	12.1115		115704834	1.01681	9.18092	1.79218		115710103	1.30904	1.34245	9.65586		115697539	12.8082	25.3157	58.4481		115712147	11.0549	8.48706	0.742693
115697853	291.893	132.721	17.819		115701361	16.1432	34.957	6.13456		115711535	20.4274	13.4864	6.28761		115701481	3.17827	0.163002	2.327		115704769	0.493854	0.117728	2.24656		115697527	3.3739	0.697748	0.22737
115699153	18.4258	0.657243	1.12603		115712595	4.42631	17.8188	7.94163		115706755	62.1526	66.1262	19.1587		115700772	9.75611	1.13575	16.2793		115721882	0.460395	2.58209	2.09106		115716021	53.2336	0.358139	3.58005
115718900	4.05337	0.001	0.248706		115697460	20.3019	72.0274	56.0318		115722270	25.1042	146.691	7.74168		115702784	1.90745	0.268288	3.80991		115717368	2.18128	1.70788	9.91796		115707816	13.8861	3.40766	0.93508
115697525	6.04766	0.092637	0.370814		115709518	19.8634	60.1622	14.353		115711410	3.84793	19.1583	3.74544		115713475	8.73711	4.00227	64.4137		115697353	1.55866	1.73385	7.08365		115722002	11.3584	0.001	0.766804
115697479	0.787754	0.0724923	0.952986		115724950	17.0145	40.9785	46.9553		115700638	8.58019	44.515	8.70587		115698755	1.67736	0.965776	12.3126		115723435	2.67297	6.01453	12.1484		115698839	1.67779	0.109526	0.114093
115724637	9.38571	0.001	0.575742		115721264	6.5896	20.197	18.1475		115699650	28.121	39.3977	8.67437		115711298	0.644041	0.462171	4.72347		115699406	9.76982	12.7799	44.3515		115709095	100.864	4.83299	6.80757
115722336	23.3835	2.63678	1.43305		115705593	15.3573	32.962	42.1708		115724871	1.93336	11.3718	0.597869		115695768	11.2727	0.0478873	82.4773		115714134	42.6859	1673.37	193.67		115723328	64.5383	3.39406	4.36465
115712107	1.61349	0.0204387	0.100187		115709882	112.128	259.609	62.0877		115706278	58.0681	177.272	34.7793		115712296	3.39998	0.240239	3.33906		115705158	1.96509	0.935171	8.91225		115707723	13.271	0.001	0.899932
115695882	70.7896	13.1045	4.38042		115698834	2.33519	16.1027	6.39498		115712709	3.56598	7.43533	1.10853		115713012	6.97288	1.20791	50.9179		115702365	0.666816	3.99766	3.01839		115704034	4.22102	0.099798	0.287229
115712997	46.9247	0.001	2.90533		115715709	3.0615	20.9358	5.0205		115719488	9.06945	6.96681	2.82275		115704317	1.43001	0.001	0.199428		115701189	3.51342	34.9471	15.9138		115720798	39.2027	3.54902	2.6727
115714631	2.88567	0.102315	0.179625		115704965	0.903527	2.97809	0.716301		115700538	33.216	47.9542	10.3382		115705284	1.76667	0.159845	2.19898		115698516	11.0377	10.3896	49.9973		115715308	7.48289	5.07473	0.51135
115708148	6.84977	0.20783	0.425129		115724518	0.940336	87.9688	2.57402		115703002	36.9235	105.408	11.5273		115725363	11.3069	0.0544873	82.5613		115725542	80.1741	216.676	362.681		115707673	1.09877	0.110834	0.20578
115722094	1.15712	0.107055	0.103493		115719098	26.9325	55.0196	73.7365		115725170	3.27544	60.7689	10.3538		115720645	32.4251	0.350788	4.52495		115697847	3.95554	5.3798	17.8881		115698725	38.8566	6.03714	2.65749
115701582	6.41748	2.40216	0.398542		115716103	3.3902	25.2492	6.09668		115707927	13.6803	65.1689	4.27768		115698149	8.60714	0.87044	11.9371		115722121	66.5271	39.8509	300.884		115722828	16.2326	0.215605	1.1195
115704175	5.08452	0.001	0.318161		115698859	3.78022	44.6534	1.44809		115718945	13.9218	48.9172	9.62064		115710117	0.616711	0.444886	4.49595		115719231	11.1179	98.2138	50.2756		115700857	6.18537	0.001	0.42756
115705341	7.67876	0.001	0.48189		115704506	100.894	448.58	108.659		115714523	20.6473	72.0393	14.1786		115705455	29.0238	0.198054	4.07219		27215487	518.585	1456.99	2342.96		115723210	8.19637	3.45957	0.566392
115707489	18.986	0.701496	1.19417		115716096	2.76403	8.73781	7.52579		115698234	24.1981	27.9235	7.58782		115722759	1.15086	0.826266	8.37683		115721701	0.753434	0.395446	3.39717		115698667	54.3786	2.83704	3.76087
115711970	5.97518	0.125346	0.376589		115699746	13.8314	36.1039	8.75009		115712060	27.648	83.7631	16.5028		115708103	4.89462	0.037533	0.688959		115707633	1.56545	3.0944	7.0571		115716632	10.9173	24.6974	0.756077
115697791	13.6828	0.0940243	0.863684		115716465	0.484018	10.9825	2.66423		115700450	12.4651	19.6353	3.91945		115721363	3.23285	0.289689	3.92912		115713111	11.0418	191.364	49.7555		115695960	6.90317	0.061473	0.478482
115714867	24.1237	0.102273	15.5602		115705515	1.3932	3.3651	3.78894		115698003	19.7175	51.1646	10.1152		115722916	12.1817	0.660853	8.94697		115696898	5.16552	5.15401	23.2577		115700519	24.0998	5.87252	1.66819
115722411	53.9348	25.4016	3.43959		115707158	8.43962	34.6807	8.42478		115713039	18.954	38.6995	5.96936		115705703	66.2162	4.48672	9.35344		115718403	3.06631	3.0629	13.8013		115709102	3.36058	0.199205	0.001
115715720	6.77958	0.337565	0.4334		115697025	3.78876	9.0537	10.3067		115708738	12.9339	26.3143	5.21656		115703612	3.4819	0.134141	1.79409		115716397	15.4745	47.7072	69.6499		115706565	59.7269	1.03579	4.13767
115705365	15.7297	0.11034	1.00506		115715246	23.94	77.7039	18.8802		115697505	8.3277	23.1922	4.61183		115721811	0.440996	0.0971623	0.916781		115725304	6.57897	2.37885	29.5969		115712066	167.11	0.001	11.593
115710062	4.12727	0.001	0.265653		115699705	57.2119	206.797	155.444		115697918	10.806	46.524	3.42146		115702787	7.31674	0.757802	10.1888		115706587	0.994584	0.424907	4.46799		115724858	7.67326	0.001	0.534661
115712099	10.6034	0.001	0.001		115712195	7.38655	21.1032	20.0564		115716153	2.57639	3.56231	0.819036		115719184	3.59509	0.001	26.1543		115712526	0.996632	6.17671	4.47577		115699056	31.2086	9.76648	2.17276
115722181	3.69407	0.001	99.9333		115719042	58.7779	121.011	29.551		115713105	0.336898	6.10787	1.22373		115707061	3.46682	0.135864	1.8156		115700623	4.89612	2.62947	21.9979		115722323	7.56086	10.4567	0.527766
115703053	4.73179	0.001	0.304714		115707313	22.5979	52.0887	61.3265		115699502	2.47151	7.05638	1.41402		115707982	41.631	2.84419	5.90973		115723246	1.7758	3.50079	7.9734		115704883	2.28038	0.139353	0.001
115705362	405.066	65.5559	26.1535		115711360	0.130245	1.59147	0.390245		115712254	0.415515	1.37373	0.133232		115725045	7.2251	0.6091	8.18028		115719290	2.39674	1.61653	10.7548		115712815	185.922	1.45247	13.0032
115725267	4.77813	0.0945597	13.59		115721294	33.3478	109.127	26.7806		115707728	23.5595	40.6262	7.51629		115696861	1.30298	0.213552	9.45465		115721064	0.734868	9.50785	3.29471		115697437	27.7321	0.397444	1.94519
115705351	5.17872	0.522263	0.335429		115719246	130.146	356.08	50.6016		115704727	2.94099	7.84715	1.58078		115704295	38.5944	5.54247	74.5189		115704392	1.14285	2.49458	5.11864		115704912	3.94089	0.110118	0.27749
115721954	19.9724	3.88781	1.29194		115708234	36.9983	120.962	29.6866		115715650	27.8333	64.4147	8.90242		115704750	1.61706	1.10056	11.7201		115709345	8.16593	1.87235	36.5855		115700791	1.33444	0.139493	0.0630423
115716530	8.13898	0.0519783	0.530361		115716162	9.42024	24.4678	6.00581		115714924	2.25103	12.5271	2.52865		115697354	1.09933	1.89636	7.94767		115701356	0.529509	0.754275	2.36906		115704213	1.74677	0.001	0.12393
115709204	186.445	8.88482	12.1594		115719777	14.7209	48.7566	12.0029		115705639	26.6802	30.3036	8.62039		115713958	3.61208	1.04273	26.0427		115718897	3.84686	30.355	17.2323		115723352	76.0877	33.5083	5.3643
115701287	4.37637	0.0567067	0.286644		115713329	6.78379	14.3352	2.64332		115699629	74.4345	100.144	24.1077		115699046	9.54746	0.090875	1.36831		115704384	21.7288	27.3218	97.173		115719355	60.5221	11.3245	4.27062
115714862	11.7694	0.340272	0.770236		115701459	6.95251	16.9554	4.17472		115712925	51.6505	152.847	16.8076		115721254	2.59096	2.04944	18.6031		115714073	2.74096	23.0444	12.2504		115721014	1.37949	0.939477	0.098287
115698904	1.17355	0.113757	0.060345		115724972	985.307	4612.22	383.939		115724641	16.0154	27.2712	5.21245		115721198	0.649201	1.06179	4.65147		115719260	10.9134	12.7804	48.7522		115699115	38.4518	1.0077	2.7152
115699742	11.7078	0.075317	0.767129		115707288	15.9952	34.22	6.24673		115709943	27.2497	124.24	25.329		115721725	0.597391	0.001	4.27827		115704466	0.941632	2.27279	4.20288		115710255	9.64856	0.001	0.685789
115722728	32.8401	0.001	2.15605		115706269	14.0081	28.6927	37.7332		115700779	23.5988	29.607	7.68125		115699125	18.7304	0.399699	2.69114		115716986	5.07115	28.7296	22.635		115724785	7.20871	2.85103	0.515978
115724724	1.14626	0.111512	1.38217		115709371	11.282	153.364	30.3828		115706303	1353.22	3699.71	440.721		115710330	3.11945	0.777271	22.3392		115696215	1.25799	0.595041	5.60785		115724124	1.8374	0.081267	0.132277
115700841	17.2016	0.846655	1.13283		115712439	1.84693	7.10937	3.81562		115722792	13.633	18.6516	4.44556		115702639	7.88561	1.02757	13.6006		115699332	2.34409	4.08174	10.452		115704901	7.98625	1.80229	0.574438
115697782	4.428	0.0748417	0.293751		115712725	2.78283	10.6449	2.62651		115695660	59.6496	154.328	31.5194		115708652	1.62277	0.17913	2.35548		115709691	30.6756	19.3683	136.714		115716621	24.7702	1.67654	1.77985
115722342	9.96103	0.198462	0.661573		115711540	4.31555	11.9164	11.6098		115718822	53.5015	49.642	17.4573		115701381	42.744	4.22638	55.631		115705000	19.7018	33.5679	87.7961		115716704	7.98371	0.549305	0.574708
115704023	3.11546	0.191967	0.208018		115720991	8.37364	19.8336	4.92403		115695287	8.61592	52.2711	10.6994		115715987	0.23533	0.471711	1.67933		115721598	0.882812	5.16207	3.92709		115719458	9.46896	9.58568	0.68157
115701510	17.8047	3.15353	1.1871		115713034	23.8501	47.7443	64.1583		115708099	8.82291	59.5054	12.1827		115708661	2.65724	0.373386	4.86616		115698803	1.37126	0.965417	6.09991		115704955	14.0638	1.61571	1.01234
115719357	45.9299	6.26749	3.06231		115709818	29.8498	167.608	11.6767		115707802	6.38264	7.3807	2.08669		115716326	36.3836	0.001	5.25999		115720696	0.29523	0.0548477	1.31048		115720654	9.73474	0.001	0.701306
115698747	2.26017	0.001	0.151737		115722864	58.1973	249.113	62.0663		115719303	12.0693	43.2598	8.86522		115696960	0.289665	0.051819	2.05935		115721929	3.78023	0.158269	16.8056		115714465	29.8557	31.0042	2.15048
115725234	2.10478	0.001	0.141946		115708651	22.5716	108.878	60.6642		115712303	1.46976	1.36073	0.481724		115709721	7.20647	0.418263	5.43074		115715726	0.933136	0.792028	4.1455		115702647	8.16602	0.001	0.592485
115716207	35.8522	0.166653	2.40626		115702804	136.273	605.282	53.3895		115702884	18.6861	15.3039	6.12574		115702728	8.36824	0.971269	12.5864		115707716	1.06857	2.56741	4.74482		115722798	6.48133	0.084188	0.474428
115719438	1.80663	0.296112	46.9668		115725742	4.10007	122.16	1.6084		115697596	1.02006	10.086	2.06844		115712114	6.61801	0.0987443	0.961413		115706240	2.26837	0.578785	10.0585		115703128	13.7584	1.6382	1.00661
115697527	3.3739	0.697748	0.22737		115705611	0.553268	1.40388	0.353058		115697319	15.8303	19.4531	5.19037		115704535	0.218411	0.0492337	1.54068		115706831	3.34381	6.70722	14.8234		115706296	5.54393	0.0343563	0.406267
115716021	53.2336	0.358139	3.58005		115713739	25.1687	88.4468	22.2244		115718581	55.1765	43	18.1102		115704555	9.10506	23.2731	64.3925		115703902	38.2283	51.514	169.054		115724097	3.36421	0.0565673	0.247066
115699433	2.46725	0.137958	1.40571		115695574	0.001	1.2712	0.001		115701545	8.55813	8.7034	2.81126		115715005	8.50757	0.287757	1.23977		115711580	1.12814	0.0837507	4.98551		115709409	5.4561	0.0333147	0.400417
115707816	13.8861	3.40766	0.93508		115705182	2.2601	4.74341	6.06296		115705486	2.61297	1.97163	0.858915		115701162	31.6379	2.24438	223.629		115696407	0.52125	0.269088	2.30123		115707959	18.671	1.13208	1.36804
115722002	11.3584	0.001	0.766804		115706223	4.08407	8.86683	10.927		115721178	8.32246	61.8201	2.73667		115722230	22.4792	1.62816	21.0018		115720632	2.50966	0.353791	11.0479		115714770	3.40621	2.11345	0.250878
115698839	1.67779	0.109526	0.114093		115723285	7.26429	29.6197	19.3983		115706802	10.3376	8.87812	3.39977		115708192	0.255865	0.285688	1.79843		115708505	1.3046	3.46398	5.74012		115705366	14.0243	3.67584	1.03033
115709095	100.864	4.83299	6.80757		115705531	1.04503	3.55733	0.897404		115715579	34.5238	137.129	11.356		115697082	0.425167	0.57305	2.98272		115724575	0.217655	0.195973	0.953975		115718489	3.81776	0.851705	0.281725
115723328	64.5383	3.39406	4.36465		115722596	20.0281	65.5286	16.5235		115709365	13.7448	21.299	4.5363		115724186	4.91895	0.03165	0.720473		115725647	0.68162	2.47993	2.99402		115711420	2.68253	0.0475793	0.198321
115707723	13.271	0.001	0.899932		115716614	3.60086	12.3899	3.1289		115706156	10.7657	44.3821	3.5742		115710120	7.9825	0.736563	9.40567		115698252	4.49943	1.07358	19.7757		115704484	2.46906	0.001	0.182993
115700026	1.10124	0.110549	1.32512		115715078	2.05922	5.19572	5.48179		115712789	4.07158	4.99724	1.3541		115704768	41.9732	15.2888	294.128		115714383	2.07973	16.7803	9.11587		115705372	18.6419	0.641024	1.38059
115704034	4.22102	0.099798	0.287229		115705883	48.0318	154.68	39.2414		115718977	4.66151	12.7097	2.64025		115725662	1.64659	1.67131	11.521		115697997	6.9522	7.15823	30.428		115724789	13.1918	5.82078	0.978399
115720798	39.2027	3.54902	2.6727		115710176	11.5967	29.7645	30.8688		115711565	7.35583	11.3202	2.45832		115698132	37.2449	1.19946	5.46357		115714329	0.924481	5.74893	4.04082		115715245	4.07107	0.303062	0.303246
115707673	1.09877	0.110834	0.20578		115710289	70.7895	158.176	27.9517		115722455	4.32914	10.0862	1.44793		115720761	15.5556	1.56717	19.9789		115707048	10.6623	15.2267	46.6356		115701200	126.984	3.20847	9.43224
115712489	37.4945	0.230942	28.1282		115705129	4.51952	24.6924	6.33704		115706398	22.5168	19.3383	7.5388		115718429	3.03298	0.237724	2.99595		115716842	1.00278	1.24163	4.38198		115719454	12.6453	2.27827	0.940761
115698725	38.8566	6.03714	2.65749		115704245	1.42944	4.7823	1.22941		115706369	14.425	32.6656	4.83395		115718430	6.64155	5.86954	46.3441		115698979	0.373706	1.70369	1.63056		115698708	8.15785	0.138835	0.608428
115722828	16.2326	0.215605	1.1195		115709929	2.06783	4.91467	5.49318		115698810	0.308326	1.40352	0.0963447		115708687	1.83053	0.209564	2.6312		115707257	3.16261	62.3402	13.8149		115697766	19.4105	0.250898	1.45023
115700857	6.18537	0.001	0.42756		115708274	16.2632	42.0188	10.8342		115712007	19.5735	41.731	6.566		115725328	8.46791	7.11867	58.9051		115698227	11.9761	8.66351	52.3231		115698306	1.37211	0.001	0.103545
115723210	8.19637	3.45957	0.566392		115697188	6.146	55.4864	16.3129		115696992	103.053	509.404	34.6152		115706090	3.68436	5.10854	25.6167		115697537	1.47576	16.6112	6.42232		115715775	8.51583	8.87695	0.638017
115698667	54.3786	2.83704	3.76087		115705693	17.3042	49.205	12.7373		115723440	10.2005	23.1551	3.42944		115715978	0.38322	0.401378	2.65695		115698677	0.898943	53.0932	3.91066		115702958	18.0787	9.84264	1.35648
115723715	1.41854	0.0221323	2.56531		115712273	4.54329	10.8516	1.79733		115698721	30.8614	98.3934	10.399		115705501	0.994671	0.140628	6.89043		115717136	12.9253	18.9874	56.2697		115721013	5.31638	1.86774	0.400321
115695960	6.90317	0.061473	0.478482		115706939	15.1387	45.6189	40.1158		115716451	142.54	569.789	120.004		115709071	0.340999	0.0740207	2.35174		115719052	2.23841	7.66846	9.74101		115709017	3.46289	0.001	0.263019
115700519	24.0998	5.87252	1.66819		115725784	1.91542	4.12626	5.07152		115713952	12.1156	66.2643	4.0882		115725616	0.323611	0.001	2.22687		115704682	1.2885	3.15298	5.60404		115724765	3.04951	0.001	0.232289
115709102	3.36058	0.199205	0.001		115711956	8.96227	36.0097	9.3794		115699430	0.394744	60.4355	1.18811		115712852	1.34111	0.513249	9.24055		115697492	7.76629	4.94869	33.687		115721335	39.6047	5.62678	3.01286
115706565	59.7269	1.03579	4.13767		115706577	1.3304	3.6142	3.51932		115722760	0.684444	4.78317	1.00877		115697330	16.5667	8.54676	114.177		115699562	1.89862	10.9952	8.22714		115725242	3.70392	0.331112	0.283442
115712066	167.11	0.001	11.593		115714646	17.1382	34.9459	9.10397		115712251	1.48029	1.67272	0.502539		115700426	28.2731	2.08648	25.8103		115708895	0.396152	0.001	1.7131		115704044	71.7318	86.1091	5.47738
115724858	7.67326	0.001	0.534661		115724915	0.344449	1.26861	0.0468827		115709801	9.18836	45.56	9.64702		115712743	22.7919	31.3317	156.037		115719489	6.2918	11.1934	27.1621		115722214	4.74193	5.40668	0.36377
115699056	31.2086	9.76648	2.17276		115725694	105.054	697.019	41.7289		115706200	81.6104	81.5895	27.6791		115698989	4.49654	9.11877	30.7034		115718592	0.723122	0.0280267	3.1119		115697788	20.5306	0.191818	1.57593
115694801	38.4305	0.200853	22.7836		115698204	27.5518	64.9624	17		115712103	1.46101	1.04443	0.100078		115710015	7.92946	0.425687	1.17353		115714742	6.15741	9.37155	26.441		115711949	12.82	0.001	0.986214
115703762	2.67069	0.039941	4.40306		115707166	0.001	1.36282	0.140917		115697467	5.72847	33.4615	1.95289		115706232	9.4161	0.870329	10.6737		115697676	5.33264	4.79519	22.8323		115722778	27.6326	97.5691	2.13336
115704883	2.28038	0.139353	0.001		115706493	20.216	41.9141	53.3439		115702903	4.96415	7.87019	1.69351		115701166	55.7991	3.41783	8.25796		115695965	0.31559	0.692824	1.34535		115707450	52.4613	13.0984	4.07255
115712815	185.922	1.45247	13.0032		115701777	17.7563	46.7232	7.08098		115702667	131.971	330.408	70.3338		115698592	1.6005	0.186587	2.26524		115700549	1.25272	9.43477	5.34882		115712567	3.0754	0.363453	0.239891
115705890	0.592999	0.001	12.8626		115716613	25.3872	56.1128	10.1554		115715161	1.10422	4.44564	0.378796		115700720	16.8242	0.504572	2.49104		115714703	6.94084	17.4568	29.6374		115704875	2.58315	2.87688	0.201986
115697437	27.7321	0.397444	1.94519		115721832	9.42571	25.9776	24.8156		115716712	30.48	74.0723	10.4452		115711171	10.4529	0.510041	1.55047		115698161	3.94048	2.08806	16.8212		115711672	32.9007	0.001	2.56399
115704912	3.94089	0.110118	0.27749		115703939	34.3036	73.7256	90.3115		115699215	0.735455	3.41156	0.727945		115708332	21.4264	1.04746	3.17911		115701091	1.41406	10.7313	6.03169		115718806	7.76316	17.1717	0.608096
115715761	0.682374	0.071726	1.14476		115710253	3.25158	11.8421	6.31856		115713266	15.8596	74.3364	15.8688		115707516	5.43924	0.162653	0.810843		115715721	6.56316	7.78473	27.9833		115715672	7.01289	0.269548	0.550377
115700791	1.33444	0.139493	0.0630423		115712210	27.209	66.5246	71.6123		115704897	17.4096	73.4378	5.99741		115709235	5.42376	0.0833497	0.810939		115697894	2.62329	0.420964	11.1692		115722945	15.5203	42.3689	1.21732
115704213	1.74677	0.001	0.12393		115712794	9.09449	19.0037	23.9071		115705323	39.8693	192.867	41.2976		115711187	36.6785	1.51384	18.4573		115720644	2.23315	0.409552	9.50194		115704886	2.0501	0.001	0.161602
115723352	76.0877	33.5083	5.3643		115698129	15.3579	64.5652	16.9743		115716967	4.91175	20.4074	4.37609		115708172	10.412	0.693256	1.55632		115710758	9.75195	7.82422	41.4976		115705586	50.9999	132.359	3.99843
115719355	60.5221	11.3245	4.27062		115702935	36.3051	96.0971	25.2877		115694727	1.08567	2.67054	0.37611		115715595	26.5353	1.98701	24.0187		115721762	0.620429	2.05498	2.63662		115700275	5.13321	3.73053	0.403364
115699115	38.4518	1.0077	2.7152		115720836	34.1062	116.092	89.5761		115705220	17.9489	39.2464	6.21928		115707496	116.745	5.79502	17.4419		115707763	119.365	233.177	507.445		115715653	26.4028	3.53101	2.07214
115710255	9.64856	0.001	0.685789		115725624	6.3788	13.6818	3.60747		115706754	99.0928	110.447	34.4674		115697518	9.86239	0.506262	6.1017		115710927	4.51616	1.58438	19.1884		115714751	36.264	0.001	2.85464
115724785	7.20871	2.85103	0.515978		115709290	162.883	495.838	427.516		115711609	13.2081	72.9946	15.7212		115717384	9.2751	15.6184	63.2615		115704694	3.35412	1.0671	14.2459		115709013	3.41407	2.28958	0.269827
115724124	1.8374	0.081267	0.132277		115702926	19.0387	58.3898	49.9455		115704012	30.4172	88.3331	10.6043		115698757	0.232195	0.175894	1.57702		115719550	2.0071	3.87069	8.51522		115717243	237.179	510.533	18.7054
115704901	7.98625	1.80229	0.574438		115713929	6.12859	13.4543	16.018		115700219	16.5752	69.0652	14.8871		115721974	11.7685	13.073	80.0739		115721195	0.685155	0.0335137	2.90388		115723236	54.3616	66.2536	4.29208
115716621	24.7702	1.67654	1.77985		115706884	21.3286	77.5259	39.9204		115708897	63.0145	172.25	22.0095		115705630	0.879006	2.87905	5.95849		115718631	9.73658	9.38652	41.239		115713814	4.78172	0.374866	0.379096
115714558	1.07345	0.115108	0.747341		115699067	9.44819	104.625	24.6825		115725651	1.31373	3.35392	0.459776		115723109	0.798998	0.186961	1.72267		115705895	1.11229	0.462178	4.70763		115706129	2.64336	8.72086	0.210116
115720088	0.827855	0.089035	0.98643		115705080	9.95614	21.8043	5.778		115699386	10.8441	38.202	3.79666		115698568	0.207844	0.001	1.40399		115705864	16.4892	15.8804	69.7683		115701321	14.5454	0.001	1.158
115716704	7.98371	0.549305	0.574708		115716235	11.5852	23.5634	30.2627		115722501	9.72675	12.6769	3.40892		115698314	7.38949	6.63291	49.7612		115721022	2.91187	2.65547	12.315		115724863	2.11746	0.252577	0.187382
115720952	1.47484	0.578016	30.7122		115710781	119.7	549.558	48.0699		115705435	41.3358	179.95	39.1383		115707181	14.8388	3.37402	99.9109		115707098	1.18545	0.194807	5.01115		115715087	6.95793	2.22632	0.554791
115718994	0.648491	0.0707297	1.13882		115723691	1.44618	5.24032	2.43214		115705882	57.9431	165.829	36.0757		115708280	22.8604	1.23058	3.45276		115725339	8.34483	7.87589	35.2839		115715261	27.5386	6.39933	2.19841
115702750	0.406939	0.001	8.18014		115708342	2.90505	7.48347	1.9908		115707772	5.13761	26.0217	1.80418		115721307	9.0914	1.13921	13.5179		115716217	0.457795	3.2315	1.93045		115700236	1.21569	4.55363	0.097968
115716717	7.14177	0.0441087	4.15214		115719433	26.4504	72.5853	69.0372		115715203	8.57241	8.88761	3.01027		115703651	6.09797	0.0294913	0.923062		115695867	1.58334	4.86583	6.6758		115699758	2.00369	0.001	0.161155
115704955	14.0638	1.61571	1.01234		115699371	101.454	256.081	68.1314		115723330	28.1288	68.3441	14.9255		115723607	8.56347	0.242148	1.30361		115703226	0.85238	2.62183	3.58653		115702977	3.55376	2.15139	0.285394
115720654	9.73474	0.001	0.701306		115704903	304.068	1249.36	122.486		115709937	125.617	101.944	44.2505		115713840	43.4465	61.5506	292.272		115701027	6.42016	2.8051	27.0076		115717106	66.0747	6.99395	5.30482
115704916	0.228881	0.001	4.56358		115713817	15.1172	100.035	26.6548		115697477	84.2933	117.196	29.7986		115704918	1.90299	0.135601	1.58814		115697240	31.4261	44.417	132.188		115722717	101.807	3.19316	8.22234
115702647	8.16602	0.001	0.592485		115723049	14.1029	34.4916	9.19842		115697780	7.29816	9.38601	2.58368		115695824	9.92254	15.9064	66.4748		115709768	29.4687	66.7438	123.696		115705342	1.07483	0.215002	0.0878303
115722798	6.48133	0.084188	0.474428		115714101	8.15441	17.5615	4.70162		115703236	10.7902	34.7119	7.58531		115708941	5.18041	0.001	0.791051		115715886	1.13429	0.001	4.75746		115722895	94.8296	77.808	7.69753
115710216	1.6179	0.085491	31.4727		115704363	6.46807	15.0499	4.0478		115723429	1.9733	6.7968	1.48975		115698964	4.07525	0.281315	27.2679		115714782	2.42744	6.42236	10.1747		115715920	3.4605	7.5991	0.282116
115703128	13.7584	1.6382	1.00661		115715676	1.58752	15.7343	4.13318		115713072	31.4619	100.931	22.1704		115708178	1.8994	0.341737	4.00446		115706646	9.27407	20.6634	38.855		115712051	2.47615	0.087502	0.202182
115706296	5.54393	0.0343563	0.406267		115699461	26.0891	52.8863	14.2314		115717352	4.46974	21.247	4.66932		115709690	0.912275	0.0753517	0.873357		115720968	2.61116	4.03993	10.9196		115706050	6.68529	3.22993	0.544615
115722662	11.0999	0.071634	6.24548		115700915	7.45091	32.4819	19.3762		115716292	39.3347	97.6143	14.022		115714469	0.69587	0.356913	4.64873		115701681	3.31188	11.1569	13.849		115722436	3.52897	0.001	0.288223
115724097	3.36421	0.0565673	0.247066		115703114	11.5405	51.2966	13.8771		115718534	34.9845	45.3898	12.4981		115716367	72.7672	40.4331	485.058		115721282	0.955441	1.84559	3.98313		115704602	63.9497	65.789	5.21241
115709409	5.4561	0.0333147	0.400417		115705224	36.2299	176.678	47.8391		115703163	228.085	199.043	81.5342		115700700	1.16455	0.090315	7.73321		115705115	6.10681	5.71341	25.4593		115712346	1.14649	0.346044	0.094378
115717210	6.48085	0.001	124.795		115715873	3.03585	20.4038	7.88672		115716083	7.50382	20.3053	4.48435		115709404	26.4493	1.54753	17.8693		115711641	1.80275	1.62703	7.50418		115719764	1.1782	0.145896	0.385671
115707959	18.671	1.13208	1.36804		115705339	17.8485	73.1546	19.8108		115701236	37.126	47.6084	13.3287		115703684	6.49171	0.469379	5.4005		115712608	0.660824	0.12338	2.7472		115705363	6.79306	0.262449	0.554784
115700869	0.779405	0.133438	14.8358		115701129	62.7995	222.561	74.6488		115722157	6.74405	33.0589	2.42734		115699482	48.8755	1.50217	7.48417		115725384	0.679779	1.83042	2.82148		115698045	3.45259	7.30446	0.282477
115698841	1.91964	0.37416	36.2641		115707278	27.5006	56.6565	11.1411		115699678	19.7326	123.283	27.2847		115701378	29.5461	0.563444	4.5259		115707081	3.33533	0.798402	13.8294		115722405	2.64133	8.64232	0.216344
115725640	3.76717	0.0395703	3.1843		115720060	0.213079	0.752544	0.622284		115709544	2.59169	12.1475	2.68993		115720598	7.77465	1.90264	51.6235		115722473	2.29675	1.33413	9.51265		115701442	12.1203	0.555505	0.991317
115708679	1.31858	0.206278	24.4285		115716440	19.3749	56.1119	15.2145		115704992	1.43826	2.99302	0.66393		115704090	2.07868	2.64021	13.7806		115713888	0.675009	1.94208	2.7926		115724786	8.79743	3.17749	0.721715
115705366	14.0243	3.67584	1.03033		115708041	71.3409	147.273	40.0444		115725551	3.06517	4.56868	1.10672		115697510	0.590943	0.0688257	3.91068		115718681	1.44929	0.001	5.99738		115722876	6.62434	0.001	0.545286
115718489	3.81776	0.851705	0.281725		115720722	17.8504	64.8828	17.6467		115695794	29.5889	93.0365	20.7404		115699499	1.86998	2.01725	12.2902		115700669	0.521779	0.444917	2.15707		115699750	11.8247	0.0403203	0.973728
115711420	2.68253	0.0475793	0.198321		115702328	0.372655	1.42901	0.390249		115700466	20.2265	17.5457	7.31703		115698223	13.6248	0.240471	2.09664		115702552	0.572712	0.001	2.36746		115716382	235.697	13.1701	19.4509
115704484	2.46906	0.001	0.182993		115702931	11.5524	34.3019	29.8854		115697639	117.573	312.565	69.7213		115715250	10.865	0.307929	1.67414		115707291	1.99935	0.568295	8.26794		115725160	34.4067	0.958393	2.84541
115705372	18.6419	0.641024	1.38059		115702344	22.8461	53.9341	14.7428		115701050	141.779	531.178	118.671		115707999	13.6842	1.01235	2.11531		115698746	0.465346	1.63985	1.9191		115698889	1.9027	0.022998	0.158246
115724789	13.1918	5.82078	0.978399		115718941	5.82113	19.2025	15.0473		115716733	6.52603	90.1043	18.7789		115706952	9.77375	1.12597	12.7765		115709308	0.233006	0.241659	0.958173		115715728	8.87792	0.615805	0.735451
115715245	4.07107	0.303062	0.303246		115708263	2.67198	16.5694	4.5361		115722900	25.6498	88.1709	19.7035		115695986	0.617377	0.193879	4.03342		115699605	6.57019	3.7716	27.0703		115699224	4.67215	11.8044	0.387951
115701200	126.984	3.20847	9.43224		115705027	4.28714	14.6897	4.03016		115700300	33.4982	46.0605	12.1562		115706215	9.04046	0.418883	4.71754		115719391	0.467967	0.266361	1.92424		115717416	8.81162	0.043232	0.732405
115719454	12.6453	2.27827	0.940761		115699726	8.77532	24.1665	3.58548		115695655	55.0626	150.054	19.9883		115696716	0.148519	0.001	0.956621		115703736	4.51305	74.4034	18.5732		115712331	1.38391	0.001	0.116081
115698708	8.15785	0.138835	0.608428		115724426	0.670705	3.52383	0.968696		115705236	4.42344	7.30764	1.60752		115722295	46.0766	6.06538	68.2231		115710227	28.4049	58.3885	116.713		115698982	24.4505	1.22415	2.03607
115697766	19.4105	0.250898	1.45023		115709041	0.738275	13.5094	0.302531		115716055	73.4329	53.9177	26.6971		115698241	37.5957	4.02276	45.2227		115714625	1.24392	2.91325	5.10759		115716965	16.3437	0.647975	1.3624
115715855	0.927147	0.105713	1.24743		115705705	15.5648	41.8025	11.4973		115712119	35.1303	110.679	24.8503		115697719	55.8699	5.02188	56.4336		115711342	2.77053	9.3806	11.3764		115722862	4.32721	0.001	0.361504
115702055	21.7491	0.269571	21.2281		115707957	52.8626	115.937	136.37		115704298	44.3637	39.1345	16.1892		115704205	5.31033	5.76709	34.3843		115705819	0.430207	0.535139	1.76314		115717409	12.5474	0.671466	1.05075
115698306	1.37211	0.001	0.103545		115714304	8.43504	36.8152	3.45228		115706125	35.8193	74.028	16.7254		115719385	0.265242	0.0390083	1.70803		115715131	0.366921	0.918103	1.50307		115700302	17.7168	1.41889	1.49045
115721013	5.31638	1.86774	0.400321		115712995	1.47582	3.76858	3.80482		115725657	7.70414	34.2326	7.75239		115705117	4.90645	0.281708	0.760391		115706044	18.6822	7.66509	76.6501		115697592	16.8361	9.91872	1.425
115709017	3.46289	0.001	0.263019		115712470	8.11139	23.6042	3.32806		115712506	54.176	130.534	29.6347		115697978	4.22667	0.510978	5.71415		115694805	0.477711	0.422565	1.95477		115700738	46.8908	35.3532	3.96734
115724765	3.04951	0.001	0.232289		115716959	5.27763	26.8061	7.38946		115709363	18.8136	54.8851	12.4762		115708164	3.61609	2.64882	23.3523		115709750	5.32285	13.1431	21.8104		115706994	4.96286	0.418558	0.421677
115721335	39.6047	5.62678	3.01286		115706434	80.4814	404.649	111.736		115720621	54.7684	192.231	43.7509		115712694	3.50482	0.590804	6.60335		115697924	0.950111	1.50863	3.86862		115702619	8.97588	0.0562173	0.764709
115725242	3.70392	0.331112	0.283442		115719242	12.0163	47.5351	30.8818		115701465	13.7626	96.2975	21.9348		115717451	37.7832	1.98869	5.86484		115708110	4.99138	7.14355	20.3141		115716296	30.95	0.500143	2.63527
115697788	20.5306	0.191818	1.57593		115716915	4.21296	11.1094	10.8257		115724944	31.091	36.4181	11.4187		115697154	22.6211	3.39101	146.003		115723034	2.4759	1.85478	10.0742		115721608	2.47788	0.800011	0.212842
115711949	12.82	0.001	0.986214		115714495	3.38318	8.50215	2.35578		115704303	42.6567	35.7018	15.7023		115700725	7.62535	2.12411	49.1549		27215498	106.724	157.454	433.878		115720575	83.8415	58.1933	7.18694
115714498	3.09391	0.0738643	5.01774		115722892	8.72066	19.8684	5.50617		115723244	8.25617	50.8904	11.6406		115707911	0.839318	0.001	5.39717		115715608	60.3689	7.56202	244.693		115706500	3.4355	8.10747	0.296597
115724204	8.16934	0.222243	15.0998		115701577	2.06969	19.2065	5.31443		115707452	16.5111	48.5046	6.08966		115711110	0.404343	0.44944	2.595		115709252	7.73897	17.9798	31.3369		115708523	791.858	608.281	68.3945
115710026	4.02814	0.093997	6.28488		115719277	21.0338	48.4512	53.9306		115703767	0.835293	4.33807	0.993166		115708101	0.933146	0.224717	0.985823		115702738	1.84885	12.5312	7.47748		115700903	44.4773	84.2886	3.84642
115707450	52.4613	13.0984	4.07255		115706576	1.39157	3.69937	3.56365		115725462	124.464	127.156	45.9465		115705685	1.30956	0.315248	2.45772		115719380	3.43127	0.207379	13.8797		115724626	9.23791	0.702748	0.800535
115712567	3.0754	0.363453	0.239891		27215476	161.316	323.704	413.118		115712179	50.3939	201.435	46.1329		115702731	43.1559	2.01775	22.4307		115719491	2.73024	10.7501	11.0373		115718407	7.59345	0.511977	0.658354
115711672	32.9007	0.001	2.56399		115709988	11.9273	41.3614	19.9324		115708199	6.50775	19.7878	4.54017		115701048	2.17726	1.64559	13.9662		115725359	11.8255	5.7417	47.8028		115716281	11.0332	14.8728	0.956352
115714244	7.85968	2.74417	136.151		115695831	6.67511	23.3008	17.0559		115709299	59.5425	283.962	65.1717		115699259	38.517	2.05691	22.8304		115721596	1.64477	3.15848	6.64057		115704043	15.249	0.0498037	1.32284
115715331	1.1623	0.0797213	19.9952		115700762	7.86656	42.888	11.9374		115694676	53.7864	820.257	19.952		115698967	0.379392	0.386221	2.4175		115725493	3.39203	8.65724	13.6902		115719768	22.7405	0.742329	1.97276
115715672	7.01289	0.269548	0.550377		115708484	3.05408	9.88561	7.79979		115715680	8.62746	75.8546	24.4561		115699637	0.888066	0.215334	0.969972		115707665	3.97791	5.25754	16.0463		115698218	4.71298	0.0765913	0.41025
115704886	2.0501	0.001	0.161602		115712545	0.985776	5.75986	1.60705		115725787	5.22516	6.33988	1.93965		115698912	10.197	0.788384	8.71483		115724497	1.22718	2.87261	4.94284		115699318	4.81687	0.28411	0.41965
115715653	26.4028	3.53101	2.07214		115705181	8.90245	18.552	22.7286		115713788	159.176	1058.13	59.1073		115703666	8.75432	0.373508	1.38157		115709433	4.13059	16.5311	16.6376		115711933	13.7351	0.234501	1.19772
115714751	36.264	0.001	2.85464		115709360	3.63638	10.0082	9.27929		115715313	11.1818	10.6936	4.15684		115705817	12.3084	1.78333	19.7181		115714992	1.25318	0.031716	5.04013		115706424	58.2829	120.218	5.0795
115713814	4.78172	0.374866	0.379096		115696989	12.2162	200.04	5.0243		115716757	1.04916	12.9147	2.96448		115701723	1.24079	3.93294	7.91835		115712893	1.17146	2.25039	4.70479		115700950	1.67589	0.426549	0.147157
115701558	1.85645	0.139447	2.55461		115720595	3.24597	8.54578	8.27564		115714183	4.36394	200.299	12.3291		115700727	4.16564	0.123347	0.658775		115719376	1.1404	0.27394	4.57951		115698280	21.6435	0.001	1.8897
115701321	14.5454	0.001	1.158		115710240	33.5706	109.112	30.4448		115697211	25.8014	35.1636	9.59594		115719540	3.2873	0.456068	5.03054		115698595	0.266874	0.001	1.06919		115707208	4.53713	0.15916	0.397241
115724863	2.11746	0.252577	0.187382		115709683	8.14625	24.7045	6.89656		115710285	13.655	28.2047	5.08087		115709164	0.269582	0.363559	1.71616		115714663	0.29391	0.691455	1.1775		115717391	53.7026	40.7105	4.70572
115721392	1.50972	0.420057	25.1605		115707404	13.4485	29.3774	8.22586		115708766	4.45439	15.7203	1.65897		115698191	0.813623	0.997894	5.1754		115698715	0.527685	0.730734	2.11155		115721774	1.127	0.078981	0.0997643
115701346	22.1646	0.263192	14.6472		115702338	4.42668	25.2523	7.07437		115712594	9.0044	34.3299	7.89314		115720781	0.001	0.228685	2.51309		115718794	7.24618	311.904	29.0201		115702429	3.52358	0.0537107	0.31161
115717452	12.0739	0.12685	6.99868		115705357	5.0426	15.8791	12.8411		115709429	20.1511	21.6064	7.50835		115700273	2.58037	0.414029	16.4215		115702705	2.12657	0.89921	8.48364		115712507	14.0927	3.1127	1.24791
115715087	6.95793	2.22632	0.554791		115715651	34.4005	196.085	87.574		115708183	9.97816	29.9643	6.89746		115709980	0.669584	0.535388	4.25263		115706973	4.1376	16.237	16.5049		115717750	12.0107	0.0895653	1.06586
115715261	27.5386	6.39933	2.19841		115697338	8.72484	23.4483	22.1676		115716767	23.96	176.747	40.6971		115721830	25.4023	1.45735	16.0006		115706123	9.8745	15.7758	39.3771		115711665	37.2228	1.85071	3.31883
115711945	2.30228	0.175162	1.07778		115721238	1.59332	5.40384	4.04334		115711954	18.7585	62.3752	14.408		115719660	9.45139	0.11821	1.49908		115722557	5.34628	2.13018	21.3051		115715278	24.7946	4.82911	2.21947
115698788	0.82372	0.0995963	0.407651		115704458	3.38532	9.51089	2.67856		115719040	267.442	909.9	100.02		115711162	4.03169	2.76663	25.5888		115719020	5.12133	8.21492	20.374		115704761	9.54598	0.199485	0.855371
115699758	2.00369	0.001	0.161155		115713911	0.653773	2.23115	2.582		115722248	23.1774	70.3513	16.3496		115699930	8.31979	0.107418	1.32167		115716599	0.693834	0.37556	2.75314		115717529	1.50136	0.001	0.135312
115712350	1.73833	0.133633	1.02812		115719059	3.32965	12.1677	8.41884		115710965	1.48379	1.48493	0.009677		115710009	4.47595	0.220181	2.40235		115703829	9.93211	1.68125	39.4436		115695779	6.25834	3.81631	0.561375
115717106	66.0747	6.99395	5.30482		115716763	6.04332	15.8064	4.45578		115715837	12.7608	41.797	9.72333		115718184	1.83007	0.178364	1.94384		115705093	1.0618	1.72522	4.21338		115715127	20.6349	31.8106	1.85002
115724897	0.202529	0.001	3.33244		115725213	14.5343	32.7626	36.6623		115718490	12.5324	28.9074	6.76737		115707827	17.2583	0.844505	9.23752		115708525	1.24002	3.79499	4.92002		115698164	1.55152	0.0781427	0.140074
115722717	101.807	3.19316	8.22234		115703430	2.91412	9.92104	5.43289		115717164	58.2562	224.886	21.8324		115712771	50.6486	3.99999	43.7655		115722003	2.86471	7.43443	11.3694		115695417	24.3278	0.934145	2.18544
115705342	1.07483	0.215002	0.0878303		115718293	2.91503	9.92104	5.34123		115702780	82.1071	362.345	30.7943		115708252	0.776421	0.910439	4.91943		115713997	0.984692	2.01382	3.90104		115712354	4.1771	0.001	0.3762
115710492	11.8446	0.146381	8.01583		115706435	4.28873	10.9915	10.7772		115707951	79.6563	338.975	79.678		115697205	15.4278	2.22008	24.1541		115699864	19.1635	37.8038	75.8414		115703628	10.9926	3.1488	0.99356
115712051	2.47615	0.087502	0.202182		115723299	0.938466	3.18091	1.8319		115715664	0.0657173	1.48675	0.350271		115717130	2.85412	7.33304	18.0636		115695046	0.524206	0.80838	2.07148		115707366	4.36258	9.5541	0.395026
115695898	3.47513	0.0581747	3.11722		115697557	3.02746	11.207	3.1756		115703561	1.59678	4.96635	1.16963		115712349	1.50129	0.001	0.242018		115722353	0.604332	0.739168	2.38825		115714024	13.6648	0.630702	1.23825
115725770	5.74988	0.448687	4.61469		115718146	0.768876	9.55436	1.92456		115718928	1.13823	1.16384	0.218419		115724093	4.82267	8.44596	30.4697		115719173	6.81061	5.70145	26.9413		115697373	10.0704	2.03471	0.913913
115698596	6.49902	0.184191	9.81818		115703131	12.2879	52.9859	15.1324		115725411	74.0791	222.73	27.8317		115717774	0.207234	0.001	1.30188		115712952	0.38435	0.356535	1.51617		115721752	41.537	34.5366	3.77262
115716919	2.7835	0.04887	2.55625		115719271	10.4182	26.4999	7.57127		115723359	12.955	49.4916	11.6645		115708767	18.1502	6.00841	114.187		115705984	1.12943	0.412053	4.45982		115706447	2.42505	5.42391	0.221115
115708993	0.713509	0.0879157	0.73146		115706439	0.844687	4.14124	1.18538		115707945	7.00487	20.9688	4.94643		115724465	18.0199	21.7697	113.071		115697843	21.4607	76.2921	84.7699		115706302	24.4966	25.2963	2.226
115706050	6.68529	3.22993	0.544615		115709080	19.5179	84.1543	8.16082		115694744	25.1622	111.524	9.4596		115708285	0.353294	0.130082	2.20968		115708776	1.5309	0.320659	6.04341		115723493	3.05367	0.001	0.278502
115722436	3.52897	0.001	0.288223		115717091	22.9051	78.3155	57.262		115699401	2.74323	4.04057	1.03363		115705312	11.4587	5.57459	71.6952		115708121	8.55392	19.9557	33.7679		115721249	32.7721	1.60406	2.98266
115719780	7.69844	0.001	121.187		115705965	1.65895	5.55221	3.21991		115696458	0.001	1.04451	0.001		115722168	1.04097	0.196635	2.1127		115708265	0.980293	0.454625	3.8603		115717444	0.830506	0.001	0.0768703
115705770	16.6294	0.577427	30.1489		115721056	10.8334	28.7304	4.53495		115721180	3.80802	38.7008	1.43738		115722656	17.4357	27.5167	108.948		115712234	73.9555	600.107	291.326		115715264	7.98333	0.0937947	0.731919
115712346	1.14649	0.346044	0.094378		115700107	9.5957	24.7391	23.9751		115723336	8.19891	20.0411	4.73163		115697734	3.21505	2.80215	20.0257		115709238	0.305845	0.001	1.20161		115708305	6.51666	0.625206	0.598939
115719764	1.1782	0.145896	0.385671		115716364	16.4419	68.4925	19.6929		115709971	77.5364	179.164	42.351		115699646	12.2344	0.120698	1.97947		115713783	410.2	767.132	1612.42		115698819	4.63992	0.461504	0.426803
115700665	3.63476	0.001	55.833		115703806	0.920977	1.89463	2.29793		115706963	1.66807	28.2332	4.65375		115695668	2.60583	2.14538	16.2212		115712569	8.51794	15.2443	33.4441		115712328	2.25792	0.052657	0.208827
115705363	6.79306	0.262449	0.554784		115705500	11.8017	41.9689	4.94326		115724470	22.236	64.231	8.39634		115707563	3.34397	2.97331	20.7608		115702712	1.89163	0.903252	7.4088		115714928	16.6362	3.80624	1.53312
115721102	0.830642	0.103776	1.15669		115705469	12.9006	43.8212	32.1999		115711136	4.64787	6.39823	1.75868		115697161	3.85669	0.234597	2.51539		115717001	4.14445	14.9068	16.2352		115724933	7.12511	6.08123	0.659253
115714708	4.44595	0.169299	67.7001		115719652	8.25229	24.838	20.5624		115718890	0.001	1.06412	0.210034		115706505	22.8834	3.67849	39.5825		115707589	22.017	185.381	86.2199		115698627	18.5638	20.1769	1.71776
115701442	12.1203	0.555505	0.991317		115719082	10.2285	20.6306	25.4838		115716744	1.16504	4.59191	1.08671		115725260	16.3678	0.001	2.66408		115708345	3.06071	0.0157603	11.9706		115723414	56.1677	0.224878	5.19822
115723418	3.84445	0.308796	2.61324		115711925	12.7865	50.9779	31.817		115709910	195.747	560.68	74.0524		115706623	41.6166	2.81256	30.2365		27215475	1233.67	2532.2	4825.85		115700296	5.56064	3.01675	0.515923
115724786	8.79743	3.17749	0.721715		115699676	18.6289	49.9508	14.4368		115723432	56.8931	50.8251	21.5347		115700411	19.6296	1.65848	17.7981		27215473	332.339	517.632	1299		115699267	135.097	9.9965	12.5222
115709286	11.6197	0.236063	11.7693		115712758	6.21442	12.6358	15.4478		115714010	59.8074	543.169	166.255		115707132	6.9741	5.33342	43.1378		115709211	0.990728	3.47115	3.86779		115705795	6.79168	0.406643	0.63186
115722876	6.62434	0.001	0.545286		115715627	11.4684	25.9646	7.50565		115714489	3.62707	3.55147	1.37381		115704601	0.197498	0.0410723	1.21653		115706648	29.25	159.561	114.262		115714527	5185.9	11838.3	483.639
115699750	11.8247	0.0403203	0.973728		115711278	3.94455	8.8499	9.80033		115695726	0.882359	0.951764	0.0103613		115695630	0.630364	0.34019	3.89299		115722318	38.1138	67.076	148.873		115705565	5.93951	2.25377	0.556607
115724481	1.01612	0.128219	1.1563		115721401	5.55845	16.3208	4.72338		115721965	6.12231	48.269	11.4914		115702336	63.5331	2.63445	10.382		115704853	3.00537	4.41964	11.7318		115712357	13.2628	0.457457	1.24316
115716382	235.697	13.1701	19.4509		115723407	58.8755	213.58	61.8117		115701361	16.1432	34.957	6.13456		115721748	5.93863	0.717983	36.6242		27215452	124.429	229.724	485.695		115714839	32.2584	67.0388	3.02402
115698141	2.5917	0.210613	1.22729		115716748	10.865	26.5901	4.5703		115709518	19.8634	60.1622	14.353		115701464	0.99923	1.31701	6.1519		115715302	9.6717	161.265	37.729		115712211	12.8648	0.623435	1.20819
115705647	0.805669	0.138529	11.9182		115696788	8.02507	37.7129	10.9173		115699672	38.3991	53.6775	14.6122		115698488	1.2138	0.533295	7.44162		115697049	1.37435	3.02047	5.35796		115724607	19.531	0.170814	1.83458
115725160	34.4067	0.958393	2.84541		115709812	0.914434	2.86607	0.832007		115703528	14.2897	26.038	5.44294		115695929	6.23242	0.977142	10.273		115698113	9.31557	19.1571	36.3146		115724673	1.8548	0.189095	0.0461547
115714822	0.45259	0.0579733	0.58718		115722761	0.797562	2.37692	0.691857		115723263	16.4848	19.8237	6.28922		115697615	4.28208	5.70269	26.2496		115705429	8.62832	6.52206	33.6118		115712145	9.24274	0.400417	0.868991
115698889	1.9027	0.022998	0.158246		115705186	31.468	75.7405	22.0719		115709882	112.128	259.609	62.0877		115708287	0.165106	0.054514	1.00667		115714563	3.3051	4.37695	12.8722		115725323	39.4111	5.46844	3.70433
115715728	8.87792	0.615805	0.735451		115716023	4.38734	18.6657	5.44158		115698834	2.33519	16.1027	6.39498		115714025	8.77971	3.06026	53.7008		115705530	24.2406	14.1629	94.3518		115708898	3.74682	0.0818517	0.352993
115716166	4.5702	0.164371	7.89495		115698584	12.4633	24.9449	30.928		115715709	3.0615	20.9358	5.0205		115709392	12.6561	2.3454	24.2384		115705625	4.17497	9.15882	16.2378		115721346	478.497	27.0278	45.0088
115717416	8.81162	0.043232	0.732405		115703568	1.58286	5.18521	2.97962		115704965	0.903527	2.97809	0.716301		115714933	2.94523	0.159417	1.63106		115706470	73.3562	209.643	284.866		115721924	4.85944	0.397931	0.458282
115712331	1.38391	0.001	0.116081		115712031	12.7084	64.0043	5.37725		115701466	67.2187	101.201	25.7111		115697575	0.448912	0.001	2.73067		115709984	0.929018	0.001	3.60277		115709205	132.995	9.02389	12.5235
115699505	0.41395	0.001	6.0624		115699248	49.0272	239.104	121.263		115724518	0.940336	87.9688	2.57402		115707272	26.259	35.4269	159.709		115698183	4.67883	7.86199	18.1448		115706749	17.5706	4.2287	1.65752
115715324	3.21813	0.108826	5.13986		115699360	233.972	1451.79	99.0055		115719149	0.779288	0.88932	0.0208893		115712201	11.3018	0.08657	1.86203		115699540	35.1974	194.82	136.506		115705087	4.74955	1.34669	0.449789
115698982	24.4505	1.22415	2.03607		115706481	54.6017	135.977	39.851		115716103	3.3902	25.2492	6.09668		115696837	3.9219	0.661105	23.8077		115707097	17.3728	6.45192	67.322		115711304	3.05005	0.07078	0.289443
115716965	16.3437	0.647975	1.3624		115715641	17.6984	86.8458	7.50343		115698859	3.78022	44.6534	1.44809		115721127	0.826427	0.207719	1.30454		115706883	17.4628	13.1716	67.6667		115719478	3.24083	0.001	0.308978
115722862	4.32721	0.001	0.361504		115723477	23.4624	49.1813	57.9836		115704506	100.894	448.58	108.659		115725756	9.19879	20.6569	55.841		115703558	0.365485	0.29022	1.41278		115720662	1.26146	0.186816	0.067142
115723198	10.1959	3.78875	149.486		115701722	2.88162	9.40612	4.78951		115708727	5.19361	6.5067	1.99666		115715020	18.8342	1.15018	11.7238		115704733	12.786	19.8326	49.4916		115716040	26.2837	2.35545	2.50507
115717409	12.5474	0.671466	1.05075		115721402	14.8147	84.6989	24.896		115716609	37.6399	46.8586	14.5465		115713267	8.01743	0.7236	7.36629		115695987	1.99296	3.68217	7.7069		115701033	3.05764	1.56124	0.293346
115714874	4.1528	0.313393	60.2895		115701586	11.6296	52.7935	4.93815		115699746	13.8314	36.1039	8.75009		115706822	1.28301	0.733373	7.74818		115711473	1.34541	0.072061	5.18992		115698056	3.65919	6.44273	0.351049
115725656	5.28792	0.446299	2.77715		115702330	4.00801	11.3719	3.34587		115716465	0.484018	10.9825	2.66423		115724571	1.86268	0.315402	11.227		115705268	18.0695	5.07741	69.6568		115716038	42.2072	0.634081	4.04776
115712445	0.908909	0.118128	1.67839		115717117	9.88879	25.1616	24.3114		115695688	11.0035	11.121	4.25949		115697485	30.224	0.001	5.00063		115717608	0.589629	0.001	2.26969		115715228	77.5813	57.2758	7.46324
115700302	17.7168	1.41889	1.49045		115715316	12.2622	32.5766	9.59639		115711560	8.21166	9.40277	3.18643		115703864	3.12576	3.94483	18.8426		115702757	23.3394	66.4408	89.7767		115706477	7.14449	16.2033	0.688739
115706994	4.96286	0.418558	0.421677		115709406	39.7598	129.096	75.167		115716432	0.749394	0.892892	0.0242083		115698740	2.71819	5.38726	16.3621		115715577	22.8483	8.45325	87.8578		115700499	48.1087	7.41905	4.64373
115702619	8.97588	0.0562173	0.764709		115705763	24.7759	83.3056	24.5896		115707158	8.43962	34.6807	8.42478		115707090	1.04264	0.171941	1.73545		115699501	3.93219	11.5439	15.0972		115718261	10.0225	0.91486	0.970235
115700961	24.5781	7.38793	348.266		115702523	0.791608	2.02772	1.9398		115715246	23.94	77.7039	18.8802		115716109	3.16458	4.30611	18.9876		115722016	0.945939	1.89472	3.62649		115718443	214.987	13.8787	20.7958
115716296	30.95	0.500143	2.63527		115711518	9.78844	19.6243	5.79776		115706596	1.52175	1.82756	0.089359		115698809	0.44777	0.29598	2.68109		115714408	2.65325	2.92467	10.1507		115709902	50.0723	5.0599	4.8456
115724626	9.23791	0.702748	0.800535		115705742	8.76705	18.6938	5.52536		115719042	58.7779	121.011	29.551		115703614	11.0577	7.51539	66.3037		115718292	0.509471	1.68975	1.94538		115716998	54.4191	3.82755	5.26662
115718407	7.59345	0.511977	0.658354		115724216	6.56497	23.421	16.0709		115708295	0.836962	1.01078	0.167718		115713634	0.943346	0.239458	1.0751		115722615	3.82064	8.56914	14.6067		115714463	204.057	197.964	19.8493
115704043	15.249	0.0498037	1.32284		115716221	5.90446	39.7092	14.4481		115711360	0.130245	1.59147	0.390245		115708028	16.3783	1.14996	11.514		115707470	0.845164	2.468	3.2252		115700585	7.97213	0.211091	0.777703
115719768	22.7405	0.742329	1.97276		115719526	0.538391	2.4795	1.31593		115721294	33.3478	109.127	26.7806		115720943	0.415903	0.07285	2.48133		115704700	0.852152	3.89212	3.24909		115704553	2.57858	1.29101	0.25227
115698218	4.71298	0.0765913	0.41025		115702870	4.39033	21.9086	10.7194		115719246	130.146	356.08	50.6016		115711163	5.56034	0.235372	0.925647		115699476	19.107	11.9876	72.809		115708933	0.857356	0.001	0.0845327
115699318	4.81687	0.28411	0.41965		115714951	8.96797	44.3289	21.8943		115701571	5.7326	11.36	2.23095		115695743	3.88385	11.1757	23.2011		115707495	58.6293	74.7343	223.214		115698546	5.01033	0.001	0.489769
115711933	13.7351	0.234501	1.19772		115720566	2.52769	13.8681	4.10349		115708234	36.9983	120.962	29.6866		115722968	11.5371	5.9148	68.9172		115707781	7.4046	6.19144	28.1379		115716863	1.69495	0.408932	0.166514
115700950	1.67589	0.426549	0.147157		115708527	8.55122	27.6052	10.9391		115716162	9.42024	24.4678	6.00581		115709264	3.94633	5.09085	23.5229		115715756	9.62321	3.17583	36.5472		115707299	10.1228	0.579741	0.990459
115698280	21.6435	0.001	1.8897		115698609	2.82723	7.05172	2.08706		115712616	1.09316	1.33592	0.0521543		115714409	6.66056	0.761484	7.58711		115724597	0.371567	0.0242887	1.40789		115720900	11.8933	0.0538707	1.1644
115707208	4.53713	0.15916	0.397241		115714852	3.33868	29.0074	8.14893		115719777	14.7209	48.7566	12.0029		115724437	3.79438	0.652126	6.47272		115721399	4.82462	1.1433	18.2896		115697005	108.021	20.1445	10.5761
115705349	7.61857	0.232798	10.1982		115720876	13.9302	48.2332	14.29		115713329	6.78379	14.3352	2.64332		115718449	6.31666	0.0308097	1.05829		115702983	5.83623	9.37753	22.1211		115700613	3.23476	0.072576	0.31786
115715218	18.0903	0.459485	20.138		115707689	21.323	70.2214	20.8136		115701459	6.95251	16.9554	4.17472		115708062	1.64418	0.001	9.77291		115709692	18.6701	20.4614	70.6968		115724434	2.47538	0.206012	0.243945
115721774	1.127	0.078981	0.0997643		115708281	4.23209	20.1356	5.97653		115724972	985.307	4612.22	383.939		115699594	4.42043	0.222321	0.741649		115724544	0.382927	0.14	1.44593		115715820	1.46795	0.0635143	0.145076
115702429	3.52358	0.0537107	0.31161		115703756	0.887362	2.84734	1.52293		115719559	34.0534	52.9035	13.2824		115695787	4.49064	0.386785	3.80689		115724842	1.3797	1.19936	5.21428		115718473	3.49671	0.243479	0.344362
115712507	14.0927	3.1127	1.24791		115707895	28.6354	91.9446	50.8084		115707288	15.9952	34.22	6.24673		115724456	2.01065	3.58365	11.8172		115715052	0.7473	24.9183	2.82134		115723323	2.76584	1.37072	0.272594
115717750	12.0107	0.0895653	1.06586		115721987	1.07131	2.83331	2.60625		115709371	11.282	153.364	30.3828		115700482	8.18533	1.11928	10.9735		115722520	17.9517	59.4633	67.7749		115697741	8.40647	0.228183	0.82765
115711665	37.2228	1.85071	3.31883		115715011	2.65122	10.2844	3.06027		115712725	2.78283	10.6449	2.62651		115698791	28.8088	2.3304	4.84381		27215449	153.491	219.263	579.095		115699079	22.3214	1.62205	2.19857
115715278	24.7946	4.82911	2.21947		115725682	22.4497	73.9413	22.0143		115714129	10.6497	24.6225	6.08362		115714911	0.723385	0.59432	4.23885		115724510	3.4545	1.44511	13.0128		115714568	337.166	113.578	33.2219
115704761	9.54598	0.199485	0.855371		115719388	24.9775	55.1427	60.7553		115720991	8.37364	19.8336	4.92403		115698304	2.9688	0.523709	5.09993		115714975	4.90416	8.4924	18.4742		115714186	6.26823	0.497133	0.618618
115717529	1.50136	0.001	0.135312		115702678	8.34539	19.9297	5.94618		115709818	29.8498	167.608	11.6767		115717273	3.64282	8.46601	21.3547		115711101	1.20253	2.10547	4.52193		115709786	16.4656	7.59686	1.62423
115725032	55.7181	1.77999	73.898		115708683	20.4631	65.1723	38.5936		115703129	11.3809	15.4256	4.45349		115723735	0.552997	0.0174137	3.21949		115720801	3.77401	5.65823	14.193		115718038	3.60556	0.770739	0.356496
115697048	1.02009	0.0457607	1.85397		115703565	1.34323	9.34527	3.26158		115716874	37.8949	56.5581	14.8328		115700902	25.6397	7.42001	149.476		115700948	4.02173	5.83003	15.1184		115699242	34.1964	21.0741	3.37598
115708768	3.06529	0.13709	5.61251		115722227	17.9928	46.0336	13.7424		115722864	58.1973	249.113	62.0663		115699619	18.2594	1.82507	17.7005		115697036	13.4068	3.80105	50.3901		115718477	3.29132	1.0961	0.326332
115698164	1.55152	0.0781427	0.140074		115705223	12.238	33.7093	29.7104		115702804	136.273	605.282	53.3895		115708724	1.47936	0.172107	1.65981		115703645	0.36706	2.31055	1.37249		115697859	19.1541	0.137874	1.90056
115695417	24.3278	0.934145	2.18544		115699670	2.62413	9.89627	6.36948		115725742	4.10007	122.16	1.6084		115722334	37.818	10.6711	219.352		115719318	9.03329	41.0234	33.8287		115725165	3.09013	7.52376	0.307953
115712354	4.1771	0.001	0.3762		115709904	3.4137	8.1354	8.28224		115705611	0.553268	1.40388	0.353058		115722209	44.5958	3.12086	30.1591		115720122	1.36234	3.82545	5.09873		115706695	3.66735	0.0294833	0.36578
115703628	10.9926	3.1488	0.99356		115725565	0.206269	0.884449	0.498035		115713739	25.1687	88.4468	22.2244		115722891	0.638749	0.169408	3.69144		115724468	13.1704	16.3137	49.2698		115708081	10.1834	0.001	1.01444
115714024	13.6648	0.630702	1.23825		115699178	20.8017	72.4784	21.7181		115707842	79.9827	162.579	40.8867		115721803	0.286035	0.219707	1.64768		115709455	0.723545	12.5514	2.7011		115725275	3.84898	9.00534	0.385406
115697373	10.0704	2.03471	0.913913		115723389	9.48809	20.399	6.11378		115695574	0.001	1.2712	0.001		115723121	14.7567	1.32158	12.749		115719856	0.525086	0.688761	1.95667		115706351	5.01052	0.670652	0.501691
115695674	0.256572	0.030969	3.25791		115707180	7.72584	18.7329	18.7006		115706824	22.6638	19.6995	8.89672		115695578	4.94756	4.14756	28.516		115712855	0.643598	1.85771	2.39869		115701058	4.6716	11.3614	0.467968
115701709	11.8928	0.308211	12.0043		115696913	1.19768	2.4763	2.89532		115707229	0.74659	1.37595	0.347559		115709903	11.6323	0.210864	1.98303		115716060	83.6113	387.864	311.96		115711601	39.7449	102.787	3.97924
115723493	3.05367	0.001	0.278502		115714385	98.2672	777.896	42.1396		115705531	1.04503	3.55733	0.897404		115722340	61.275	4.20588	10.4681		115709052	0.525122	1.13638	1.95564		115720970	6.58598	7.38897	0.662049
115701508	7.9962	1.18125	100.013		115707608	17.8542	38.5351	43.1717		115722596	20.0281	65.5286	16.5235		115716111	2.88057	0.933046	16.51		115703418	39.8148	51.5792	148.473		115701299	10.7252	0.350254	1.07831
115703077	2.20166	0.213487	1.53686		115722553	13.6026	96.813	32.8786		115716614	3.60086	12.3899	3.1289		115699356	1.65552	0.167275	1.59928		115702773	1.45972	1.86795	5.42899		115706407	5.5531	0.001	0.559009
115721249	32.7721	1.60406	2.98266		115721825	76.9443	277.837	185.913		115705883	48.0318	154.68	39.2414		115714238	10.4604	0.678167	6.50697		115724955	4.9037	6.73688	18.2381		115716230	112.716	13.8299	11.3537
115715806	4.14439	0.0877667	3.30329		115699265	29.056	116.601	35.0856		115724557	39.2454	39.982	15.4959		115698559	0.265481	0.238809	1.51388		115703099	29.9331	13.2299	111.162		115706622	13.783	1.5466	1.38915
115708312	119.233	3.65628	133.03		115710843	4.83814	15.1069	9.09806		115710289	70.7895	158.176	27.9517		115722212	3.71492	0.22574	2.15188		115715125	6.62045	6.83442	24.5342		115702425	2.53738	11.2185	0.256518
115717444	0.830506	0.001	0.0768703		115715270	10.0827	24.241	7.3264		115705129	4.51952	24.6924	6.33704		115722233	5.88267	0.001	1.00881		115704713	1.86886	0.170071	6.92008		115700508	3.79012	0.241334	0.383903
115715264	7.98333	0.0937947	0.731919		115714187	7.74921	20.4959	6.21296		115704245	1.42944	4.7823	1.22941		115695698	3.1681	0.311585	2.97093		115721615	6.49082	25.4428	24.028		115705581	82.4429	181.442	8.35615
115708305	6.51666	0.625206	0.598939		115701288	38.8073	110.787	33.5838		115708274	16.2632	42.0188	10.8342		115712026	0.142524	0.038339	0.795005		115715478	0.580583	1.25723	2.14367		115721766	20.8066	1.82435	2.11524
115698819	4.63992	0.461504	0.426803		115707876	82.0456	167.392	50.8126		115697188	6.146	55.4864	16.3129		115697316	1.63479	0.514998	9.34324		115703931	1.66842	19.0579	6.16205		115701428	2.7643	0.153988	0.282626
115712328	2.25792	0.052657	0.208827		115714272	49.9812	143.259	43.4982		115705693	17.3042	49.205	12.7373		115722383	4.67109	0.36595	3.48004		115711545	1.19864	1.53049	4.42382		115717321	7.12704	14.0736	0.728465
115714928	16.6362	3.80624	1.53312		115725769	1.69942	5.27259	3.49398		115712273	4.54329	10.8516	1.79733		115715243	6.31346	0.218146	1.08806		115719700	5.79157	10.1469	21.3655		115707091	2.62616	0.1259	0.269341
115708930	33.428	9.87964	410.685		115708503	3.04372	9.44424	6.99322		115712604	6.76251	10.7834	2.80094		115705232	2.36445	0.507938	4.82887		115699479	22.0967	28.8915	81.4902		115710658	13.5176	9.57616	1.38693
115699684	15.1531	1.5402	185.916		115705821	13.4243	41.644	22.3703		115711956	8.96227	36.0097	9.3794		115714957	4.86142	1.01445	9.61412		115702659	13.6482	8.65852	50.295		115698322	127.86	99.3518	13.1923
115723414	56.1677	0.224878	5.19822		115719599	11.0899	77.4312	26.6718		115714646	17.1382	34.9459	9.10397		115716690	6.09196	0.564404	5.34277		115705811	0.155461	0.374118	0.569837		115699160	28.3508	0.226061	2.92864
115707568	2.17489	0.216964	1.20766		115697803	0.518643	1.5958	0.486737		115724915	0.344449	1.26861	0.0468827		115694731	3.95336	0.65468	6.19652		115709251	18.2126	507.709	67.0418		115705114	0.861479	0.001	0.0898717
115699267	135.097	9.9965	12.5222		115714684	21.2599	55.6291	16.9604		115725694	105.054	697.019	41.7289		115721836	1.19438	1.28603	6.82034		115722812	10.7395	8.40723	39.4761		115725654	24.1647	0.407488	2.49803
115709034	20.5686	7.44914	250.911		115719130	0.342433	1.05559	0.82061		115698204	27.5518	64.9624	17		115724831	0.278649	0.172581	1.58609		115708771	0.0793857	2.32755	0.288868		115697499	26.8753	2.23676	2.77999
115724564	1.75625	0.533855	21.1357		115714181	10.2663	24.607	7.51026		115707166	0.001	1.36282	0.140917		115711262	0.217749	0.0370537	1.23764		115725336	1.92762	0.280578	7.0685		115704594	4.24996	1.13701	0.440715
115705795	6.79168	0.406643	0.63186		115709358	52.8271	178.85	54.7499		115706001	9.91361	13.4716	3.94787		115721733	1.93985	1.08284	11.0572		115710403	2.55259	5.56927	9.35144		115722580	154.169	0.895276	15.9614
115705565	5.93951	2.25377	0.556607		115709547	40.2737	138.735	96.607		115701777	17.7563	46.7232	7.08098		115706045	1.6346	1.49562	9.28191		115714216	0.261838	0.599225	0.95573		115716265	97.2361	29.1949	10.0772
115715591	2.84471	0.091365	3.12522		115715257	0.452741	4.87954	1.08445		115701045	12.1263	10.8571	4.83788		115697412	2.37679	3.29244	13.4775		115698203	2.2649	1.26562	8.26548		115725665	8.49646	3.01872	0.881906
115712357	13.2628	0.457457	1.24316		115722189	17.5008	96.569	29.6004		115716613	25.3872	56.1128	10.1554		115722643	9.00835	1.12035	10.5416		115722602	36.6059	32.4187	133.574		115699297	317.48	2.38485	32.9428
115706153	75.406	1.41487	48.8126		115697737	5.03307	58.3059	2.19183		115698129	15.3579	64.5652	16.9743		115725090	195.309	10.4864	34.0192		115711003	0.474979	0.513519	1.72841		115705851	2.86159	0.989993	0.297922
115712211	12.8648	0.623435	1.20819		115705150	4.3865	12.1046	10.5095		115702935	36.3051	96.0971	25.2877		115700821	5.27378	2.19557	29.9016		115709825	0.222269	0.860178	0.807386		115698237	25.4821	2.20988	2.64747
115724607	19.531	0.170814	1.83458		115697439	6.91685	21.1183	13.7257		115725624	6.3788	13.6818	3.60747		115724553	0.666273	0.920977	3.76245		115709154	8.65345	8.37636	31.5219		115724154	33.8704	5.52878	3.53366
115724673	1.8548	0.189095	0.0461547		115723976	7.46343	40.7643	12.5511		115720755	8.85697	12.1163	3.55604		115712577	12.7622	2.16137	20.199		115708137	0.505635	0.157017	1.83753		115697284	34.3117	1.89103	3.58207
115712145	9.24274	0.400417	0.868991		115703832	2.84625	8.68747	5.50981		115699067	9.44819	104.625	24.6825		115712832	9.65249	0.605597	1.68665		115704436	2.58893	4.26776	9.41721		115715766	16.1765	0.943481	1.69149
115725323	39.4111	5.46844	3.70433		115718636	2.91513	13.899	4.28511		115705080	9.95614	21.8043	5.778		115714909	27.8583	1.95194	4.87093		115718012	0.477949	0.245509	1.73439		115705282	2.17693	0.0561727	0.228454
115708898	3.74682	0.0818517	0.352993		115701108	7.73172	23.5819	44.559		115710781	119.7	549.558	48.0699		115698662	0.425562	0.844607	2.39459		115700625	0.742346	1.28072	2.69441		115719077	7.60026	0.859532	0.795833
115721346	478.497	27.0278	45.0088		115695640	5.10075	16.9041	2.22373		115709808	7.19729	11.0708	2.89369		115704238	2.10668	0.21826	2.02628		115704374	3.4875	7.27878	12.6492		115714623	6.08215	0.0447227	0.637178
115721924	4.85944	0.397931	0.458282		115713922	10.8354	39.6304	12.2626		115708342	2.90505	7.48347	1.9908		115706418	9.91207	0.51393	1.73921		115698090	6.54205	1.99402	23.7245		115696902	4.6236	1.67725	0.484713
115714427	1.46104	0.213382	0.268256		115713781	2.14935	6.03073	1.8741		115718802	1.45506	2.08322	0.288485		115707631	11.2476	1.92292	17.9153		115715253	1.04999	1.05269	3.80436		115721865	7.47007	19.9502	0.784899
115709205	132.995	9.02389	12.5235		115704823	6.22097	19.8401	6.19032		115699371	101.454	256.081	68.1314		115707950	53.418	2.21618	9.39346		115714204	10.1056	11.6133	36.6318		115714925	38.0509	23.7149	4.00028
115723117	2.73807	0.116163	3.90429		115716985	37.6027	114.349	63.181		115704903	304.068	1249.36	122.486		115708217	6.50053	0.661788	6.15911		115710238	8.38995	7.94207	30.372		115700694	5.52493	9.725	0.582582
115706749	17.5706	4.2287	1.65752		115715842	13.0955	39.7698	23.2852		115713817	15.1172	100.035	26.6548		115718143	3.21381	0.363782	3.37429		115718144	1.39971	4.51968	5.05116		115716202	24.9854	2.03625	2.63148
115697650	1.50668	0.221035	0.895976		115714873	14.121	31.7922	9.92228		115723049	14.1029	34.4916	9.19842		115712644	0.562591	0.766593	3.16221		115714531	2.84621	9.23709	10.2736		115712163	2.67676	0.001	0.282901
115715890	1.68432	0.17494	1.19049		115703161	5.77451	17.3145	2.52224		115711484	11.4547	17.444	4.61906		115710887	0.862703	1.32084	4.84267		115706236	5.05405	9.32284	18.239		115711699	12.0035	0.826241	1.26622
115705087	4.74955	1.34669	0.449789		115721935	0.581062	1.76157	0.0503273		115714101	8.15441	17.5615	4.70162		115721939	5.88098	0.207609	1.03697		115722425	10.8445	82.9863	39.0912		115719745	1.89052	0.055118	0.200257
115707477	1.33126	0.196586	0.97048		115713078	1.83997	12.5636	3.92535		115704363	6.46807	15.0499	4.0478		115724103	42.4092	0.494072	7.48253		115714342	2.67154	10.6963	9.62528		115715337	4.98753	0.240515	0.526926
115711304	3.05005	0.07078	0.289443		115697726	8.58307	21.4601	6.70479		115715676	1.58752	15.7343	4.13318		115719238	200.912	14.8275	35.528		115715690	2.28841	0.823533	8.23736		115702656	16.7202	1.19469	1.76609
115719478	3.24083	0.001	0.308978		115720533	5.30284	16.067	8.17322		115699461	26.0891	52.8863	14.2314		115697904	0.684387	1.0511	3.83458		115710119	1.05367	0.522028	3.78434		115722351	9.22083	0.165303	0.975159
115720662	1.26146	0.186816	0.067142		115715656	7.63125	16.7878	3.35595		115703114	11.5405	51.2966	13.8771		115699151	14.6011	12.1456	81.8934		115709438	35.3364	16.7833	126.857		115723422	30.4358	123.945	3.21809
115703610	2.2929	0.240465	1.44047		115708317	2.71981	8.23553	5.14376		115694780	35.2447	68.2175	18.4641		115697008	0.505363	0.001	2.8271		115716536	0.819725	2.04424	2.93982		115725620	9.56929	4.73349	1.01693
115716040	26.2837	2.35545	2.50507		115704679	1.82374	5.50041	3.09461		115705224	36.2299	176.678	47.8391		115695722	1.89369	2.60455	10.6029		115720940	1.40168	0.12027	5.02568		115712791	28.2992	3.66117	3.01755
115714543	0.85812	0.25263	10.0647		115711613	6.68293	14.2344	2.94596		115722246	19.604	38.5095	7.92579		115718550	0.680998	0.184889	3.80761		115725403	0.509495	0.545995	1.82401		115705574	14.0739	1.00467	1.50125
115715814	3.86818	0.0991993	3.10711		115703922	7.4786	16.4653	3.29669		115715873	3.03585	20.4038	7.88672		115710167	1.10665	0.200101	1.82838		115725515	14.0243	22.2768	50.2675		115703634	4.84242	3.95176	0.518127
115716038	42.2072	0.634081	4.04776		115716525	13.5152	37.6356	11.8515		115705339	17.8485	73.1546	19.8108		115715227	12.9588	0.001	2.30078		115722548	5.51315	3.82346	19.7571		115709206	215.288	13.309	23.0193
115700569	2.38522	0.09623	3.00162		115716629	13.7092	41.2469	21.9753		115713858	8.02582	9.93437	3.24652		115709642	1.51691	0.304803	8.45971		115714920	1.99364	6.17966	7.14028		115724458	5.65779	0.001	0.605985
115704666	2.40023	0.148626	4.64156		115699757	0.359811	2.88709	0.911908		115724472	8.62141	15.2465	4.13236		115712335	1.27107	0.001	7.08575		115711333	0.600152	0.001	2.14678		115723950	13.6103	1.62953	1.45679
115700499	48.1087	7.41905	4.64373		115710274	8.95432	26.8557	14.2096		115707278	27.5006	56.6565	11.1411		115724778	1.20546	0.0667617	6.71666		115714215	0.236265	0.793613	0.842718		115708723	1.96999	0.029155	0.212173
115718261	10.0225	0.91486	0.970235		115703408	1.49271	4.47003	6.77514		115716440	19.3749	56.1119	15.2145		115721141	1.93686	4.47875	10.7839		115718157	0.483763	0.159959	1.72731		115698588	41.8467	24.2942	4.49228
115718443	214.987	13.8787	20.7958		115696863	24.4403	75.5624	23.9752		115708041	71.3409	147.273	40.0444		115710207	0.884851	2.43518	4.91899		115708085	191.927	52.2198	686.14		115695993	7.80631	11.2953	0.839378
115709902	50.0723	5.0599	4.8456		115713900	10.6809	22.1496	25.3255		115720722	17.8504	64.8828	17.6467		115716225	0.404695	0.001	2.23778		115699169	0.787842	3.65952	2.81249		115718193	10.4139	1.51253	1.1242
115716998	54.4191	3.82755	5.26662		115722741	4.61349	15.0051	4.76809		115706858	8.22986	12.4767	3.39524		115700515	33.4688	3.23089	29.4192		115708657	1.77137	5.63402	6.32674		115718960	18.4192	17.1737	1.98832
115700585	7.97213	0.211091	0.777703		115723019	5.37881	17.9118	5.69383		115714990	22.1154	24.485	8.99462		115720160	1271.14	2387.1	7004.07		115708662	4.48404	0.365052	16.0165		115707498	7.8183	16.1057	0.845225
115719683	4.148	0.160493	4.97035		115705621	10.1393	32.7138	10.4101		115702328	0.372655	1.42901	0.390249		115711659	1.56838	0.292215	2.64668		115706151	10.6676	19.7247	38.102		115701434	6.6743	6.21096	0.724075
115694773	3.81738	0.120827	3.7259		115705686	13.2759	44.7291	14.2548		115723448	10.1949	23.1663	6.32245		115724177	2.84677	0.154785	0.506602		115720651	11.0905	42.7126	39.5822		115704851	8.23174	0.106093	0.892984
115708933	0.857356	0.001	0.0845327		115713724	65.1766	135.373	43.28		115702344	22.8461	53.9341	14.7428		115712124	1.04665	0.287998	5.75555		115722933	2.31513	0.487567	8.25684		115694820	45.5699	35.6041	4.95905
115702799	2.16133	0.145591	4.48443		115697926	28.6181	67.5428	21.6055		115708263	2.67198	16.5694	4.5361		115721936	3.54084	0.249222	2.25252		115724600	2.25495	2.9283	8.03956		115700070	10.8714	0.112627	1.18447
115698546	5.01033	0.001	0.489769		115706497	0.525462	1.707	0.546987		115705027	4.28714	14.6897	4.03016		115699679	0.631106	0.154192	3.46671		115723445	1.66593	3.69817	5.92686		115703155	3.24278	0.001	0.354188
115716863	1.69495	0.408932	0.166514		115703242	3.56165	10.5593	5.09075		115699726	8.77532	24.1665	3.58548		115715739	0.983917	0.214058	1.92958		115705364	3.57907	0.157404	12.732		115718880	34.5376	2.9962	3.76691
115707299	10.1228	0.579741	0.990459		115705672	76.9903	267.056	85.579		115724426	0.670705	3.52383	0.968696		115722896	10.2082	24.4956	56.0798		115703825	0.764693	0.001	2.71799		115717307	72.9117	18.3118	7.95275
115720900	11.8933	0.0538707	1.1644		115696971	3.72459	9.21906	2.95731		115709041	0.738275	13.5094	0.302531		115695661	4.08005	10.3965	22.3547		115714276	17.6842	3.50847	62.8844		115704676	2.41179	0.001	0.263937
115697005	108.021	20.1445	10.5761		115722997	3.00413	8.89683	4.82337		115705705	15.5648	41.8025	11.4973		115710365	13.5056	1.90333	17.1209		115723182	4.95132	29.9202	17.5879		115704523	371.645	234.475	40.5693
115702729	1.6124	0.179077	1.39175		115712938	4.25996	12.6121	6.8414		115714304	8.43504	36.8152	3.45228		115716920	0.328209	0.0627147	1.7885		115725480	218.139	483.348	774.701		115707224	10.9606	1.09963	1.19899
115700613	3.23476	0.072576	0.31786		115705673	80.4413	320.967	102.952		115712470	8.11139	23.6042	3.32806		115704846	2.86475	0.209306	1.87393		115704921	1.12939	0.001	3.99988		115718808	3.84437	0.001	0.422354
115724434	2.47538	0.206012	0.243945		115695627	9.68231	47.1063	22.8516		115716959	5.27763	26.8061	7.38946		115712385	20.5534	0.0298293	3.6743		115705794	6.1087	10.0127	21.646		115717976	20.9744	19.9703	2.31499
115723646	0.838968	0.129082	0.772701		115708790	1.08541	2.42791	0.780425		115706434	80.4814	404.649	111.736		115724798	0.208796	0.177565	1.13577		115714706	2.73876	1.68016	9.70073		115715681	44.8055	0.386011	4.94545
115715820	1.46795	0.0635143	0.145076		115709413	5.54806	15.3232	4.92386		115714495	3.38318	8.50215	2.35578		115711984	17.2059	0.940209	3.08244		115697931	5.80697	7.67111	20.5677		115698700	26.8107	23.5918	2.96484
115716766	1.9882	0.221339	1.0121		115707102	4.69877	13.8804	6.90938		115722892	8.72066	19.8684	5.50617		115707205	11.8189	1.20411	10.7503		115715629	2.03872	2.04196	7.21867		115698813	7.04791	1.74076	0.780814
115706669	1.5903	0.244772	1.52749		115706591	23.4184	69.0664	40.1013		115701577	2.06969	19.2065	5.31443		115724531	0.616636	0.235895	3.35055		115701152	4.46639	11.2846	15.8142		115712493	6.75344	41.0813	0.748553
115718473	3.49671	0.243479	0.344362		115712300	0.805336	2.97166	1.89635		115706266	38.4846	66.1776	15.8005		115714513	0.779374	0.245528	4.19767		115701067	6.76372	12.7179	23.949		115714496	2.41198	0.0276607	0.268074
115697384	14.681	0.286908	8.37923		115715614	10.3655	30.4729	20.2366		115722134	8.44649	9.57088	3.46982		115709717	5.67225	1.22398	10.8825		115708667	0.920523	2.62099	3.25316		115724709	6.49948	3.55306	0.722111
115697741	8.40647	0.228183	0.82765		115711948	2.5648	8.57202	6.03132		115712067	1.12091	2.1712	0.461135		115721388	63.2384	8.53393	75.8407		115700834	8.62326	10.9807	30.4752		115714104	101.237	18.5959	11.2504
115699079	22.3214	1.62205	2.19857		115706666	12.32	34.8638	5.49568		115700762	7.86656	42.888	11.9374		115699470	29.2522	2.25063	19.9901		115714007	0.898327	0.001	3.17206		115724111	165.978	5.12407	18.4465
115714568	337.166	113.578	33.2219		115705519	10.3845	35.3143	11.3909		115712545	0.985776	5.75986	1.60705		115700952	32.5264	17.1281	174.813		115721410	1.63111	1.26757	5.76164		115708343	8.12711	0.001	0.905033
115723355	1.24965	0.256337	14.1784		115717069	29.2914	160.886	68.7784		115696989	12.2162	200.04	5.0243		115699514	1.44164	1.10492	7.74277		115696845	1.38021	5.02031	4.87385		115705791	2.68437	0.001	0.299617
115714186	6.26823	0.497133	0.618618		115704824	3.08912	6.57623	2.12431		115725431	33.6062	62.6253	17.4668		115712813	9.76469	10.4187	52.3721		115717386	0.001	0.460847	0.652696		115702915	8.58882	0.184879	0.958624
115709786	16.4656	7.59686	1.62423		115705225	6.78801	17.4116	15.9268		115710240	33.5706	109.112	30.4448		115699273	1.90521	0.632337	10.2118		115698535	0.318561	1.61702	1.3842		115713792	6.86538	0.555066	0.766461
115721920	1.65769	0.001	18.7157		115708984	0.412504	1.20571	0.0100573		115705321	3.36632	2.92619	1.38605		115701196	139.134	23.0579	201.881		115714799	25.1217	165.886	88.6539		115705762	12.4744	0.001	1.39628
115718038	3.60556	0.770739	0.356496		115700348	23.3177	129.532	10.4221		115709683	8.14625	24.7045	6.89656		115705761	180.509	15.5594	32.5743		115723136	1.29828	0.402463	4.578		115699173	0.819056	0.144317	0.0458067
115718477	3.29132	1.0961	0.326332		115702076	9.6709	28.2844	15.2722		115700251	3.6158	4.77072	1.33433		115719714	19.7858	2.58571	22.4808		115715094	0.801153	0.087898	2.82292		115703682	9.73459	0.846241	1.09312
115704899	7.25515	0.103923	2.92434		115695943	55.4217	138.319	129.817		115706228	11.4136	20.8849	4.70926		115702629	10.2394	1.39913	12.1506		115699459	9.30183	21.6775	32.7356		115707182	30.7694	7.62751	3.45944
115697859	19.1541	0.137874	1.90056		115701706	6.25126	17.5506	14.617		115707404	13.4485	29.3774	8.22586		115694985	2.7749	0.498705	4.3229		115717094	39.0443	85.6122	137.374		115706225	388.727	187.269	43.7014
115714681	0.521367	0.163024	5.87536		115718878	5.6062	16.3777	10.3303		115702338	4.42668	25.2523	7.07437		115714900	0.935102	0.89319	4.99812		115722713	5.43135	10.5221	19.0975		115698303	189.82	50.6069	21.3429
115695540	0.446253	0.0701087	0.838133		115725449	25.3567	67.1238	21.774		115715651	34.4005	196.085	87.574		115698310	6.16269	0.759378	6.58042		115707149	5.0385	7.57876	17.716		115720616	18.0068	2.68528	2.03548
115706695	3.66735	0.0294833	0.36578		115704068	1.07255	6.07048	2.50283		115714057	23.0084	25.1494	9.50734		115707100	3.4633	0.617716	5.34591		115694854	6.65851	14.5922	23.4087		115703202	215.32	467.433	24.3602
115708293	1.0869	0.169657	1.25344		115721847	1.93368	8.11819	2.64231		115716371	15.0705	29.6839	8.34538		115718829	3.12253	0.13356	16.6913		115701715	1.3448	2.65393	4.72368		115709568	1.93233	0.001	0.219501
115708817	2.33498	0.159879	4.47348		115698801	30.9505	95.5903	31.1236		115711988	1.41422	3.23375	0.586627		115698291	1.77164	0.469024	4.05214		115703142	28.3652	11.9592	99.619		115701397	351.057	1.56362	39.791
115702189	16.1826	1.10201	30.8106		115721594	2.22785	6.43263	3.42104		115704458	3.38532	9.51089	2.67856		115705923	3.77912	0.560001	4.83744		115705063	1.29631	7.91456	4.54682		115712924	4.50069	1.6261	0.511012
115708081	10.1834	0.001	1.01444		115699751	18.9682	56.8093	18.5054		115716763	6.04332	15.8064	4.45578		115715323	6.40314	0.283007	1.16857		115701742	3.76616	5.78026	13.2091		115696870	11.2788	18.2916	1.27995
115711709	2.2338	0.074733	2.0604		115707582	2.99121	52.214	6.96269		115709028	0.581409	0.975307	0.001		115697593	7.62125	1.14726	9.91089		115702978	0.832547	0.146863	2.91628		115721872	0.855392	0.0792563	0.0980977
115706351	5.01052	0.670652	0.501691		115706209	0.699941	2.00679	2.00227		115715319	11.6793	10.3573	4.86051		115709188	1.21332	0.262872	2.26112		115723143	0.935557	0.884964	3.27387		115708883	7.78114	3.74203	0.886268
115723574	19.6451	1.02679	219.955		115716643	6.90397	24.2627	7.9128		115697557	3.02746	11.207	3.1756		115721760	5.62638	0.553102	4.76314		115715031	16.8159	6.49945	58.832		115701448	7.60179	0.396991	0.867461
115699179	0.378865	0.001	4.22609		115707362	2.00678	5.7437	5.17522		115707860	80.1061	89.9688	33.3778		115707804	14.9556	1.73553	14.9608		115698925	6.26579	1.95096	21.9145		115697658	3.86157	3.64161	0.441169
115702587	1.65703	0.191714	0.981684		115708510	9.15923	35.1574	11.5038		115725316	5.57727	9.44798	2.32726		115702381	0.750867	0.032497	4.0087		115712585	10.45	8.70736	36.549		115724059	2.15743	0.001	0.247853
115700873	13.8971	0.365131	9.94038		115709967	9.52001	20.1448	6.59631		115695890	13.1773	26.0226	7.42688		115699702	1.31873	0.141348	7.04145		115706006	0.825892	1.95452	2.88593		115707221	7.01476	2.15086	0.804915
115712197	7.18835	2.40463	79.99		115707942	7.31877	19.8896	6.52644		115716452	9.24431	11.5717	3.8611		115720097	2.14572	0.380326	3.26874		115721389	3.33871	1.09606	11.6456		115707369	89.0227	14.1284	10.2129
115702690	5.75139	0.277069	7.45628		115707741	5.41598	186.087	12.5909		115718146	0.768876	9.55436	1.92456		115723485	1.05654	0.29661	1.21742		115719139	16.0129	25.7238	55.7888		115719000	18.8441	0.0370363	2.16645
115707354	969.535	61.6082	1646.04		115724714	0.389879	1.11276	0.363639		115703131	12.2879	52.9859	15.1324		115722782	2.11658	0.728334	11.2944		115706148	130.197	253.224	453.561		115716229	96.9738	10.5002	11.1584
115705031	5.84387	0.336396	8.9445		115716154	6.16124	16.4203	14.3122		115719271	10.4182	26.4999	7.57127		115703417	20.279	27.9848	108.166		115703127	5.67678	7.29575	19.7719		115708873	0.929747	0.21419	0.107872
115703643	1.27137	0.200826	0.848622		115695876	2.86628	17.8856	6.65121		115714086	6.76221	12.6378	3.61494		115719259	17.395	1.97418	92.6946		115706113	5.42702	5.58556	18.9006		115716622	4.49167	0.221557	0.518664
115707692	5.83026	0.001	63.175		115701215	3.00665	38.3045	6.96365		115717339	14.5378	17.9981	6.07513		115722797	11.4571	4.2226	61.0126		115710295	1.17882	5.29777	4.10282		115706271	4.69082	1.48757	0.542452
115701299	10.7252	0.350254	1.07831		115707707	5.92093	13.4754	4.42451		115706439	0.844687	4.14124	1.18538		115714722	5.18629	0.529035	4.54154		115695723	2.07087	6.61631	7.20237		115724681	1.54259	0.17706	0.179025
115702316	1.59798	0.187084	1.39857		115715716	10.8508	30.9769	18.2822		115709080	19.5179	84.1543	8.16082		115702950	21.3996	1.85532	15.9355		115718813	2.0864	1.10886	7.25376		115715645	6.68185	0.316226	0.773197
115706407	5.5531	0.001	0.559009		115709736	6.88584	14.9649	15.9407		115697703	83.0399	109.165	34.7563		115703759	10.5348	1.39566	11.9553		115696833	2.14141	0.1199	7.43482		115724745	37.0526	6.48339	4.2858
115716230	112.716	13.8299	11.3537		115722444	2.21163	9.76337	3.20884		115721056	10.8334	28.7304	4.53495		115713982	10.1954	0.0718713	1.87736		115714063	5.86331	13.4727	20.3062		115709667	178.263	4.35344	20.6412
115706622	13.783	1.5466	1.38915		115697569	11.2537	52.7684	17.4201		115716364	16.4419	68.4925	19.6929		115699261	5.00131	0.475542	4.05802		115714240	3.76982	5.74003	13.0496		115724844	1.15866	0.211142	0.0246947
115700508	3.79012	0.241334	0.383903		115706805	1.65196	4.0656	3.81824		115705500	11.8017	41.9689	4.94326		115721202	1.61789	0.321567	8.58786		115698184	23.7698	18.5334	82.2847		115704358	11.4825	1.79675	1.33041
115721766	20.8066	1.82435	2.11524		115708105	1063.05	8839.14	479.85		115699676	18.6289	49.9508	14.4368		115715589	3.30016	5.4776	17.4565		115708653	18.3466	31.0657	63.5065		115714539	5.43472	0.051348	0.632249
115701428	2.7643	0.153988	0.282626		115699055	3.40335	13.7999	7.86731		115705773	1.84284	3.29771	0.775517		115716348	5.91557	1.25638	10.6613		115720790	9.34902	9.22291	32.3358		115713067	4.91289	0.635763	0.571935
115707091	2.62616	0.1259	0.269341		115704650	1.99106	7.13696	4.6003		115715627	11.4684	25.9646	7.50565		27215490	3.81642	6.27101	20.0692		115704683	7.09621	10.4584	24.5352		115714171	2.03629	0.001	0.237785
115714360	1.00449	0.162007	1.33015		115719351	60.9589	184.724	61.1866		115721401	5.55845	16.3208	4.72338		115706839	11.6414	0.74675	6.3259		115705325	3.38455	11.3305	11.7005		115699220	49.0498	25.8032	5.70851
115699160	28.3508	0.226061	2.92864		115711506	10.3169	22.702	7.54688		115723407	58.8755	213.58	61.8117		115706238	77.4867	5.61139	47.4492		115695872	1.71835	7.40167	5.9386		115698626	7.42341	0.156687	0.86521
115705114	0.861479	0.001	0.0898717		115697189	5.92698	29.8086	9.92471		115716748	10.865	26.5901	4.5703		115706130	2.83121	0.293494	2.47452		115702632	2.40328	11.9792	8.30466		115724733	1.88538	0.075069	0.220582
115695896	4.90257	0.257023	6.38678		115716725	13.6763	35.3817	6.19275		115696788	8.02507	37.7129	10.9173		115707920	20.4063	24.1631	106.946		27215480	3.35545	7.12555	11.5705		115710226	473.368	0.069776	55.2771
115725654	24.1647	0.407488	2.49803		115712693	1.40562	3.96713	2.46216		115709812	0.914434	2.86607	0.832007		115724068	13.5679	17.4825	71.0611		115702858	30.1876	16.1881	104.062		115698309	527.765	1152.06	61.6767
115699573	16.1756	1.20701	168.251		115703439	0.949974	2.67749	4.78347		115719531	32.204	57.1087	16.5714		115719463	325.128	25.7384	217.479		115701707	3.43434	11.4192	11.8344		115715822	9.30567	15.8273	1.09054
115697499	26.8753	2.23676	2.77999		115723362	11.214	66.8745	22.3704		115722761	0.797562	2.37692	0.691857		115719032	0.765047	1.56501	4.00243		115722141	0.412398	0.996135	1.41875		115722775	7.433	6.17537	0.871484
115719397	4.21347	0.0984543	2.43151		115709295	0.218832	0.614658	4.09674		115705186	31.468	75.7405	22.0719		115708825	9.73931	1.22951	10.3752		115721377	26.4631	10.1394	91.1033		115717403	2.76764	0.0464187	0.325167
115704594	4.24996	1.13701	0.440715		115711939	3.45466	9.72812	6.37999		115716023	4.38734	18.6657	5.44158		115719860	20.9712	40.8629	109.777		115698192	15.5368	14.3539	53.4654		115704094	12.3019	24.4572	1.44374
115700479	6.0401	0.27108	6.69835		115707742	4.13769	11.6419	6.01666		115724577	3.42282	6.61445	1.44534		115712069	4.4793	0.769028	6.4349		115709002	1.58475	0.125701	5.44341		115724653	10.1912	0.383164	1.19655
115697512	0.453166	0.001	4.69626		115700896	10.9771	33.0994	11.107		115697381	39.4889	76.231	22.2495		115698256	9.13184	1.74635	14.6219		115707923	6.55911	20.5844	22.5259		115708126	9.10463	11.4644	1.06978
115722580	154.169	0.895276	15.9614		115706838	3.93038	11.0497	6.49387		115725117	31.4087	42.4528	13.277		115719603	14.4122	4.88664	75.2999		115707632	2.21163	4.79578	7.5919		115707401	5.69903	0.049946	0.670407
115716265	97.2361	29.1949	10.0772		115699990	6.33139	13.6843	4.59283		115712031	12.7084	64.0043	5.37725		115716186	2.54806	0.391314	13.2724		115698448	0.596931	2.49138	2.04722		115698312	3.43707	0.001	0.406412
115703562	4.77769	0.107416	2.57912		115700697	4.78947	14.4915	4.86388		115699360	233.972	1451.79	99.0055		115724949	7.77192	0.347286	1.4559		115725012	9.71611	40.7042	33.3468		115698033	9.01217	2.36977	1.06622
115725665	8.49646	3.01872	0.881906		115723433	18.3707	38.1415	8.33758		115706481	54.6017	135.977	39.851		115704949	0.348881	0.37981	1.81224		115710045	0.582369	0.235447	1.99549		115724688	10.8252	10.2644	1.28658
115721414	0.725668	0.119252	0.296663		115699851	10.627	47.9158	16.0935		115716414	15.4013	28.764	8.43654		115706211	1.14497	0.66788	5.95538		115724890	3.6853	5.13763	12.6392		115725671	4.21773	2.52177	0.502712
115724140	44.3598	1.38352	32.8989		115694861	10.051	25.772	8.66331		115715641	17.6984	86.8458	7.50343		115707156	9.94323	16.1328	51.7017		115701240	6.24073	4.27389	21.3807		115695924	24.2606	4.15299	2.89067
115699297	317.48	2.38485	32.9428		115711631	2.48652	5.72569	1.1292		115705166	38.4422	120.615	16.3128		115725376	2.97569	0.598478	4.97463		27215500	287.548	500.924	984.207		115704720	2.55107	0.0378537	0.305352
115705851	2.86159	0.989993	0.297922		115697308	5.55327	16.6602	2.52357		115721402	14.8147	84.6989	24.896		115707220	12.5602	1.60767	13.374		115720469	8.41172	10.1029	28.7747		115708244	2.25341	0.0464577	0.27048
115698237	25.4821	2.20988	2.64747		115720586	10.8442	30.3464	15.8439		115701586	11.6296	52.7935	4.93815		115720529	2.98089	2.17875	15.4637		115698884	4.09722	12.0552	14.014		115725330	939.888	2222.97	112.573
115724154	33.8704	5.52878	3.53366		115718911	26.3509	86.1976	29.0668		115702330	4.00801	11.3719	3.34587		115703083	5.0157	0.634605	5.27155		115717092	2.21334	10.9059	7.55902		115709441	2.59143	0.484259	0.311321
115697284	34.3117	1.89103	3.58207		115723011	23.4952	63.9464	21.6007		115715316	12.2622	32.5766	9.59639		115695797	4.06793	0.179153	0.766122		115719013	14.0957	22.9775	48.1115		115707630	5.32088	0.623192	0.638719
115715766	16.1765	0.943481	1.69149		115717114	5.02265	13.9582	9.04287		115705763	24.7759	83.3056	24.5896		115712005	9.71403	1.91336	15.899		115711942	0.323075	0.044224	1.10013		115702395	14.8373	33.2023	1.78244
115705423	0.889935	0.0918243	8.9025		115707558	0.628417	1.38642	1.44312		115711518	9.78844	19.6243	5.79776		115705916	0.96442	0.443069	4.99501		115701705	1.71469	8.86658	5.84368		115706835	13.1879	0.001	1.59234
115708872	5.18968	0.646908	5.89381		115702913	37.1315	102.901	55.1293		115705742	8.76705	18.6938	5.52536		115715662	7.89178	0.001	1.49049		115713481	0.714905	0.609844	2.43393		115696510	5.20711	0.740754	0.632635
115705282	2.17693	0.0561727	0.228454		115704169	11.0704	37.9822	12.8554		115725674	7.2852	12.6144	3.73114		115716927	25.503	1.89822	15.7682		115714921	3.91133	13.4903	13.3224		115725780	13.4049	0.732613	1.6314
115719077	7.60026	0.859532	0.795833		115700848	33.8681	94.233	31.8949		115716221	5.90446	39.7092	14.4481		115714132	3.39831	0.182986	17.5276		115697856	5.5182	4.22898	18.7781		115725080	1.47061	1.07431	0.179776
115714623	6.08215	0.0447227	0.637178		115720743	8.04342	72.8418	3.66886		115702870	4.39033	21.9086	10.7194		115713069	9.44274	21.1964	48.6303		115697598	0.593126	1.62533	2.01605		115709471	1.84047	0.632423	0.225014
115696902	4.6236	1.67725	0.484713		115718285	7.41745	15.9692	17.0224		115720566	2.52769	13.8681	4.10349		115696838	1.68109	0.001	0.321287		115694757	0.554412	2.09421	1.88424		115723376	9.73084	0.001	1.18835
115705859	1.21377	0.39837	12.0699		115724820	2.91085	8.3535	6.67926		115698609	2.82723	7.05172	2.08706		115698812	26.6367	62.8094	136.841		115722538	38.0256	54.0823	129.358		115723381	5.7832	0.119517	0.707135
115724658	5.67483	0.211118	4.87549		115706920	2.20182	6.11588	5.05085		115714852	3.33868	29.0074	8.14893		115701353	117.651	164.079	603.718		115702949	7.77981	138.08	26.463		115695793	68.3816	89.4457	8.35209
115704049	3.43128	0.221299	33.9507		115714189	38.7869	88.2333	17.698		115720876	13.9302	48.2332	14.29		115699218	17.8041	0.0690217	3.39761		115700667	144.892	38.052	492.784		115694767	155.895	0.653039	19.0663
115716202	24.9854	2.03625	2.63148		115718418	17.8826	42.2382	41.0149		115707689	21.323	70.2214	20.8136		115717404	190.352	12.71	36.3728		115708383	3.22394	8.30873	10.9543		115699532	38.1961	29.4239	4.67643
115712163	2.67676	0.001	0.282901		115714176	9.45408	26.0189	14.3113		115708281	4.23209	20.1356	5.97653		115716289	1.14593	0.215748	5.86355		115700361	17.2946	26.9842	58.7544		115722597	2.60689	1.09909	0.320132
115711699	12.0035	0.826241	1.26622		115706628	30.8609	84.9121	59.4217		115704928	3.18855	5.15132	1.53174		115723358	17.5182	1.79039	14.7011		115697521	0.581776	2.51503	1.97384		115707897	1.20353	0.073781	0.148284
115719745	1.89052	0.055118	0.200257		115712843	75.3012	285.051	96.5318		115715011	2.65122	10.2844	3.06027		115700928	8.03013	3.79655	41.0941		115702351	3.01872	0.460627	10.2516		115721157	9.08586	0.191618	1.11476
115715337	4.98753	0.240515	0.526926		115703603	5.94451	11.8946	13.6271		115725682	22.4497	73.9413	22.0143		115706911	27.5973	2.46579	20.2273		115706891	4.35507	8.06079	14.7828		115722822	4.91216	0.632404	0.603138
115718906	3.10044	0.241344	5.46146		115716868	22.8329	57.8123	10.4255		115725546	62.5254	67.3953	26.6588		115698878	6.86774	0.151069	1.3138		115722558	9.24324	24.2715	31.3506		115707780	4.4139	0.402352	0.54248
115702656	16.7202	1.19469	1.76609		115717366	9.5006	29.4949	10.0187		115702678	8.34539	19.9297	5.94618		115700866	16.3609	1.89709	15.5453		115721074	0.512803	0.0328437	1.7349		115700465	13.4651	6.23867	1.65823
115701296	1.187	0.199482	0.653298		115719261	30.1486	130.591	44.3975		115703565	1.34323	9.34527	3.26158		115703118	36.0521	3.4772	28.4218		115705972	0.785434	1.99324	2.65809		115706494	16.4686	0.0821083	2.02962
115711194	2.5956	0.637403	25.2011		115716022	28.5149	57.6275	19.606		115704611	13.0315	13.6087	5.57604		115718461	10.6066	1.77956	14.5118		115697372	3.35255	5.88339	11.3481		115709596	2.5385	0.894797	0.314461
115722351	9.22083	0.165303	0.975159		115719138	2.51126	12.1166	4.13048		115722227	17.9928	46.0336	13.7424		115694737	7.6874	0.216773	1.47912		115709950	3.56099	3.05427	12.0367		115709619	316.04	122.237	39.0604
115725620	9.56929	4.73349	1.01693		115711414	2.40847	8.57412	2.92663		115707681	8.58284	18.4837	5.52742		115707810	13.7657	0.240795	2.64854		115719946	3.81602	11.9209	12.8968		115704933	7.04901	0.0464163	0.872975
115706432	4.31219	0.111746	2.43382		115707240	2.35301	5.08084	1.73504		115705635	20.0261	24.0586	8.58003		115714116	8.48776	1.25104	10.188		115705894	44.8143	42.6897	151.468		115700506	92.01	88.1895	11.4034
115712791	28.2992	3.66117	3.01755		115712299	2.23662	8.17962	2.79286		115699178	20.8017	72.4784	21.7181		115706776	4.56106	3.03367	23.3048		115700652	1.56025	0.59986	5.26582		115701216	6.21685	6.33022	0.773392
115705574	14.0739	1.00467	1.50125		115719524	4.59092	34.8999	2.10029		115723389	9.48809	20.399	6.11378		115718889	6.7606	1.25425	10.2119		115706412	1.10067	5.53692	3.71257		115698258	2.19786	0.001	0.274317
115709206	215.288	13.309	23.0193		115699457	9.76487	25.0213	8.56701		115714385	98.2672	777.896	42.1396		115699301	24.0103	1.67336	13.6009		115709916	7.8962	8.09643	26.6391		115710061	1.53697	0.001	0.1922
115724458	5.65779	0.001	0.605985		115701249	15.836	35.142	12.0495		115698556	3.55809	7.00448	2.10599		115698941	20.3232	2.56072	20.8097		115701191	2.17032	4.84816	7.3183		115705038	22.821	1.99729	2.84309
115723950	13.6103	1.62953	1.45679		115722763	13.364	90.3132	30.5097		115722553	13.6026	96.813	32.8786		115723531	3.01618	2.08313	15.3742		115715240	0.483865	0.0541153	1.62955		115704268	1.66973	1.20488	0.208906
115708723	1.96999	0.029155	0.212173		115709938	7.9631	21.4832	13.7307		115711592	10.7025	18.6918	5.6216		115702382	27.0566	3.48699	28.2855		115724606	1.31697	9.28182	4.43791		115706421	352.492	0.27178	43.992
115718193	10.4139	1.51253	1.1242		115706774	2.49438	7.25245	5.68954		115711840	93.872	177.235	40.3476		115721188	31.5557	2.82869	6.09113		115696988	37.5116	72.7148	126.445		115708155	5.41063	0.106061	0.676195
115704851	8.23174	0.106093	0.892984		115706496	0.620998	1.8051	0.620687		115701115	14.4603	18.797	6.21849		115708405	2.33249	4.77805	11.8751		115708303	1.09608	0.001	3.68758		115704099	10.4603	6.66916	1.30715
115698243	4.26817	0.362086	7.8267		115718476	2.7026	53.1589	6.14676		115699265	29.056	116.601	35.0856		115714366	9.88518	0.001	1.9119		115705620	2.7463	0.739585	9.24028		115699531	1.04068	0.546916	0.13084
115700070	10.8714	0.112627	1.18447		115699132	21.3754	57.3585	40.6579		115705368	12.3872	11.5814	5.34477		115696589	0.369504	0.13742	1.10085		115706667	10.3943	24.3222	34.9227		115720918	580.674	1138.49	72.6352
115707571	9.6592	0.809504	17.474		115725652	41.981	180.758	62.1377		115715270	10.0827	24.241	7.3264		115705845	0.817755	2.05573	4.15104		115698695	5.15447	12.8897	17.2988		115715330	6.78661	0.210183	0.850594
115703155	3.24278	0.001	0.354188		115709331	6.10064	12.6945	13.869		115711955	3.6787	6.77243	2.05273		115706626	3.82352	3.82689	19.4181		115707658	15.0114	27.1876	50.3653		115697808	4.09736	0.068726	0.513967
115715781	5.15905	0.226626	4.86837		115719253	36.0004	98.2984	33.873		115698666	1.7225	2.95861	0.897382		115718496	0.786188	0.188521	1.51159		115699816	1.59154	2.70522	5.33549		115719612	119.406	258.078	14.9619
115718880	34.5376	2.9962	3.76691		115719514	23.1751	54.2942	18.7404		115714187	7.74921	20.4959	6.21296		115699909	18.5318	0.414423	3.6112		115720959	32.5413	32.612	108.917		115714622	11.2643	16.7143	1.41237
115717307	72.9117	18.3118	7.95275		115709991	9.12761	24.3369	15.0188		115701288	38.8073	110.787	33.5838		115705295	11.1705	1.57243	12.6221		115712711	3.1858	8.66989	10.655		115716754	75.795	10.6551	9.50326
115704676	2.41179	0.001	0.263937		115696878	4.73627	15.1993	10.7537		115707876	82.0456	167.392	50.8126		115705925	8.84732	2.05749	16.4192		115715187	6.00518	14.8951	20.082		115719565	10.7212	1.67808	1.34588
115697202	21.1424	1.19287	25.5938		115708216	10.4428	38.3999	23.7077		115714272	49.9812	143.259	43.4982		115721273	10.8159	0.271416	2.11535		115702947	99.3758	28.1053	332.265		115718792	0.834827	0.464477	0.105736
115707224	10.9606	1.09963	1.19899		115721225	2.10889	4.72659	1.63367		115723230	1.48219	2.60532	0.792853		115706036	6.02978	0.138883	1.18048		115722528	2.47583	3.79332	8.27561		115709304	230.632	121.735	28.9816
115722445	7.30995	0.203236	4.30211		115699266	27.3221	100.399	12.5958		115719599	11.0899	77.4312	26.6718		115702596	12.3968	30.8288	62.7022		115721802	0.314241	0.0798117	1.04784		115702697	7.60224	35.7776	0.957703
115718808	3.84437	0.001	0.422354		115717013	7.29748	24.5263	8.47572		115697803	0.518643	1.5958	0.486737		115720584	0.78397	1.01978	3.95319		115700356	10.7478	17.279	35.9067		115698911	92.4353	0.645603	11.6371
115715681	44.8055	0.386011	4.94545		115701235	17.9196	47.7094	25.6721		115714684	21.2599	55.6291	16.9604		115720971	3.89008	0.0114797	0.765186		115720804	0.195782	1.80238	0.651204		115707892	1.43873	1.21551	0.182273
115704818	0.251237	0.001	2.34791		115724036	0.817641	2.17511	1.81946		115714181	10.2663	24.607	7.51026		115706235	0.327431	0.001	1.64781		115723311	2.67722	1.65304	8.92496		115709370	13.7408	10.7749	1.73709
115698813	7.04791	1.74076	0.780814		115717421	336.859	1337.53	463.389		115709358	52.8271	178.85	54.7499		115705678	9.93854	0.747215	1.95715		115715911	4.27922	12.115	14.247		115709461	3.3694	0.001	0.428024
115714496	2.41198	0.0276607	0.268074		115707572	1.04593	2.78194	1.45105		115715257	0.452741	4.87954	1.08445		115712937	6.01001	0.815103	6.472		115709647	14.2348	32.9545	47.3963		115717103	36.8357	21.5159	4.67684
115714104	101.237	18.5959	11.2504		115700994	6.21819	24.5292	14.0968		115722189	17.5008	96.569	29.6004		115701456	0.854819	1.29	4.3052		115706035	0.94071	0.121435	3.12422		115717375	14.285	0.641005	1.81555
115724111	165.978	5.12407	18.4465		115719301	24.8943	75.5487	26.3243		115697737	5.03307	58.3059	2.19183		115711433	2.69939	2.47527	19.6383		115709873	2.23992	4.78847	7.44026		115718527	4.72926	12.2161	0.60307
115708343	8.12711	0.001	0.905033		115721304	9.90528	33.9779	11.8498		115719537	7.02658	12.0258	3.0598		115718081	0.516888	0.180935	2.59612		115704022	1.82414	21.7598	6.05246		115707884	5.17377	0.001	0.659755
115705791	2.68437	0.001	0.299617		115725606	3.65244	12.279	4.28384		115701503	0.50506	1.04602	0.00472333		115725300	20.9511	1.89207	14.9212		115707993	6.20737	6.11883	20.5886		115702104	9.75831	10.9618	1.24588
115698208	0.600854	0.105472	1.03381		115707740	20.3356	62.3396	21.7489		115723976	7.46343	40.7643	12.5511		115706110	2.8568	2.16694	14.3607		115703106	22.9364	11.2568	76.0493		115723006	7.72211	0.267284	0.986162
115702915	8.58882	0.184879	0.958624		115698575	17.1922	49.6187	17.3546		115718636	2.91513	13.899	4.28511		115699320	3.52969	0.637202	5.00755		115706293	38.1954	71.2959	126.643		115718171	4.30248	20.394	0.550017
115713792	6.86538	0.555066	0.766461		115721967	85.66	345.168	193.386		115695640	5.10075	16.9041	2.22373		115710355	13.7598	2.10095	16.5001		115709583	2.02559	1.30999	6.69869		115712477	1.6	0.147457	0.205269
115705762	12.4744	0.001	1.39628		115710389	22.5696	49.7397	17.4376		115713922	10.8354	39.6304	12.2626		115706821	11.709	2.35286	18.4584		27215478	5.02192	5.69487	16.6107		115714544	6.67385	11.2116	0.856812
115700445	88.6729	0.144965	804.046		115695695	110.456	294.442	103.443		115713781	2.14935	6.03073	1.8741		115706356	10.1983	2.32711	18.2215		115703797	1.11956	0.001	3.69997		115720850	366.071	652.425	47.0048
115699173	0.819056	0.144317	0.0458067		115719169	1.33089	5.23947	1.84591		115718396	9.16515	9.22582	4.00176		115714367	11.8006	0.329664	2.34328		115717098	2.56862	0.195859	8.48479		115719667	202.777	28.3124	26.1194
115707174	87.2867	2.34913	47.8879		115716636	3.03005	6.18547	6.83593		115704823	6.22097	19.8401	6.19032		115697260	2.05067	0.42274	3.29337		115707250	0.463552	0.001	1.52749		115707962	56.3495	15.4512	7.26202
115703682	9.73459	0.846241	1.09312		115715748	6.49232	16.6517	5.88489		115714873	14.121	31.7922	9.92228		115712342	7.24931	0.510206	3.96871		115716278	15.1519	13.3649	49.9957		115713184	27.422	42.4747	3.54296
115707182	30.7694	7.62751	3.45944		115705596	161.901	369.634	130.679		115703161	5.77451	17.3145	2.52224		115713766	0.481904	0.94711	2.41845		115703621	1.61242	0.0135337	5.31804		115700787	87.8311	83.9639	11.3628
115706225	388.727	187.269	43.7014		115706112	18.5491	48.582	24.6448		115721935	0.581062	1.76157	0.0503273		115701319	2.95675	0.425346	3.29849		115708939	3.1368	6.72094	10.3284		115722556	33.676	115.201	4.35763
115698303	189.82	50.6069	21.3429		115711275	3.0786	8.04186	5.38723		115713078	1.83997	12.5636	3.92535		115710554	8.41807	18.7313	42.2474		115715888	0.383696	0.65967	1.26111		115706886	15.299	0.208086	1.98174
115720616	18.0068	2.68528	2.03548		115698582	1.5241	3.97889	3.0131		115697726	8.58307	21.4601	6.70479		115718495	37.3047	5.2355	40.6746		115708241	1.01378	1.08014	3.33528		115698070	36.2615	13.0489	4.69607
115712502	121.94	5.90494	118.724		115707146	4.66524	12.1814	8.63252		115708706	18.1655	27.16	7.976		115699764	4.1476	4.01708	20.7546		115723106	4.75824	0.665874	15.6473		115711846	46.1936	54.6847	5.99237
115722995	2.56985	0.126391	2.51794		115715194	66.1624	156.44	55.7756		115715656	7.63125	16.7878	3.35595		115714683	4.59913	0.653499	23.0093		115708650	0.89412	1.26755	2.93826		115707603	367.147	701.25	47.7891
115709568	1.93233	0.001	0.219501		115705813	5.28275	13.785	9.77408		115711613	6.68293	14.2344	2.94596		115699227	3.41328	1.06245	8.20927		115701675	1.43543	9.07292	4.71811		115699288	3.11087	2.95986	0.406763
115701397	351.057	1.56362	39.791		115721089	2.09282	5.44903	4.59814		115703922	7.4786	16.4653	3.29669		115722530	4.0189	0.001	0.805705		115714891	2.03196	0.432032	6.67		115712554	1.02988	0.208001	0.247707
115712924	4.50069	1.6261	0.511012		115714600	37.7947	119.468	42.745		115716525	13.5152	37.6356	11.8515		115725655	7.18498	0.562556	4.32909		115716891	3.05305	10.2484	10.0222		115714466	9.40615	0.001	1.22913
115699420	10.8672	1.02672	20.5128		115696801	1.32211	7.58522	2.72804		115699757	0.359811	2.88709	0.911908		115712867	81.4253	6.44458	16.3184		115698018	10.8434	15.5808	35.5823		115716407	26.98	0.625419	3.52419
115714133	3.59155	0.001	31.6852		115697404	2.34709	7.35754	1.09682		115716946	10.0861	19.6642	6.22725		115711014	0.607192	0.480708	3.02892		115723179	2.04666	1.12865	6.71181		115707365	0.670852	9.0813	0.0887347
115721872	0.855392	0.0792563	0.0980977		115724131	4.6096	11.9535	7.07346		115696863	24.4403	75.5624	23.9752		115725522	21.9425	35.8613	109.588		115721055	2.46316	2.25351	8.0736		115715585	5.78424	1.79208	0.759289
115698798	7.3437	0.585013	11.6626		115701285	11.3737	33.9206	5.31506		115705285	27.6474	47.8715	12.2439		115715692	84.6311	11.6872	89.4422		115706452	6.49646	30.8732	21.2819		115701179	1.6827	10.0722	0.221879
115701448	7.60179	0.396991	0.867461		115710629	7.59555	30.9729	11.2043		115722741	4.61349	15.0051	4.76809		115722078	30.7576	2.58432	19.7575		115709220	0.549991	0.771878	1.79938		115720543	10.4952	1.45976	1.3802
115724059	2.15743	0.001	0.247853		115712478	27.215	76.5794	27.7521		115723019	5.37881	17.9118	5.69383		115722818	0.774072	0.045754	3.85906		115725442	3.21742	3.26245	10.5286		115705733	7.30974	0.11905	0.962837
115716457	1.70839	0.0950797	15.0126		115713248	8.12081	20.9977	14.5141		115705621	10.1393	32.7138	10.4101		115705234	18.8186	4.80352	36.516		115707321	2.58416	1.90357	8.45453		115704140	14.8217	31.8737	1.95403
115707221	7.01476	2.15086	0.804915		115710066	1.38897	3.58983	5.44025		115720893	82.7782	148.016	47.1336		115697778	2.3587	0.337421	2.5569		115715105	5.45286	7.76515	17.8369		115706345	5.76502	0.001	0.762371
115707369	89.0227	14.1284	10.2129		115704249	13.5221	46.262	16.7962		115705686	13.2759	44.7291	14.2548		115708349	1.18852	1.0315	5.88909		115700977	2.80142	5.16413	9.16243		115705527	1.15206	0.194893	0.120717
115719000	18.8441	0.0370363	2.16645		115708695	50.8492	156.201	23.8123		115702812	22.4734	44.1083	14.0841		115705838	12.354	22.8352	60.9869		115707751	2.8009	11.8075	9.15162		115704790	1.81496	0.001	0.240929
115716229	96.9738	10.5002	11.1584		115712139	11.3824	27.2702	9.91524		115713724	65.1766	135.373	43.28		115708847	1.16098	0.001	0.234829		115719855	0.585496	0.783079	1.91024		115713887	5.81241	1.47897	0.77132
115708674	5.02013	0.429365	8.40222		115699092	6.84531	17.6684	9.6199		115697926	28.6181	67.5428	21.6055		115707973	15.5025	3.24771	24.535		115704045	1.79875	1.81694	5.87308		115698646	17.3175	44.2497	2.29971
115711696	23.9581	0.613217	12.0052		115705123	97.3775	251.17	143.692		115706497	0.525462	1.707	0.546987		115711453	1.62653	0.064913	0.329732		115697163	11.231	21.2857	36.5731		115718332	4.96388	0.247707	0.661003
115716622	4.49167	0.221557	0.518664		115707077	4.36165	24.421	2.04518		115716509	11.6825	11.9095	5.19529		115706370	35.3801	1.72117	7.15892		115705197	18.9777	39.4835	61.7913		115703134	18.7886	28.0188	2.50098
115706271	4.69082	1.48757	0.542452		115702608	2.21994	8.50091	4.98009		115705672	76.9903	267.056	85.579		115720604	9.65422	3.94677	47.6264		115710302	72.413	57.0037	235.723		115702726	13.5428	0.279984	1.80296
115720540	16.2309	1.00681	19.6962		115694690	21.3813	62.645	22.7976		115696971	3.72459	9.21906	2.95731		115712980	1.82543	0.517734	3.89749		115703143	4.4505	5.13136	14.4852		115708719	10.8114	3.60222	1.43999
115724681	1.54259	0.17706	0.179025		115703576	18.5328	42.3005	15.4165		115724430	0.643161	1.4173	0.310875		115719686	10.2533	0.856406	50.5246		115712180	4.14589	17.9765	13.4881		115709313	53.0769	4.08023	7.06823
115698954	0.368411	0.067348	0.743608		115724611	7.1659	15.3008	16.0622		115705673	80.4413	320.967	102.952		115725538	2.10402	1.40846	10.3612		115700460	81.9734	24.4711	266.561		115696993	9169.63	10104.2	1220.99
115715645	6.68185	0.316226	0.773197		115707646	15.3893	60.8195	34.4658		115695627	9.68231	47.1063	22.8516		115707307	12.1609	17.6108	59.6836		115719399	38.1546	6.02228	124.063		115716825	2.56549	0.557726	0.342883
115718869	53.4232	2.42216	47.4101		115721916	3.58857	24.5786	8.02939		115708790	1.08541	2.42791	0.780425		115695670	1.97621	4.37384	9.69381		27215474	2.39256	5.32228	7.77491		115723032	7.94364	0.0618923	1.06019
115724745	37.0526	6.48339	4.2858		115716158	9.34337	39.2201	20.9061		115709413	5.54806	15.3232	4.92386		115712151	1.48636	1.86745	7.28376		115714978	5.74359	8.81832	18.66		115712403	2.59311	2.24207	0.348324
115709667	178.263	4.35344	20.6412		115711963	11.7696	36.0847	26.3336		115717254	4.29024	5.87701	1.91036		115713791	4.43118	0.168247	0.902373		115725331	52.5604	114.274	170.553		115715133	50.7332	5.10316	6.80029
115714211	8.99733	0.381419	7.32773		115716549	9.4836	24.3263	17.7851		115701167	20.4898	37.363	12.0329		115707592	11.0363	18.1937	53.962		115708742	30.8958	54.7992	100.181		115710195	22.0351	0.099263	2.95645
115724844	1.15866	0.211142	0.0246947		115718791	35.0749	142.564	52.0798		115721284	27.7256	38.6911	12.3523		115717347	59.7348	5.61015	41.8682		115719547	9.73562	7.64825	31.5362		115694770	900.845	1871.37	120.887
115704358	11.4825	1.79675	1.33041		115708497	6.79663	33.3149	15.2001		115706666	12.32	34.8638	5.49568		115697301	8.22652	2.51677	40.1164		115704322	3.11601	0.908191	10.0887		115723489	6.56624	0.001	0.883101
115714539	5.43472	0.051348	0.632249		115719204	4.0707	11.1193	9.10146		115705519	10.3845	35.3143	11.3909		115695795	25.6274	2.52946	18.8451		115702579	2.01714	1.92795	6.52035		115714434	1.82819	0.316962	0.030904
115713067	4.91289	0.635763	0.571935		115725179	0.946595	2.4216	1.31351		115718684	1.91781	3.32755	1.07453		115709293	4.17238	5.18323	20.3165		115724834	2.23775	5.76183	7.23171		115699719	12.0302	12.5693	1.61984
115714171	2.03629	0.001	0.237785		115699645	23.1088	74.7568	27.3939		115707347	6838.75	317.508	48.7468		115716260	2.39037	0.613144	4.54352		115716423	18.6894	38.0577	60.3769		115715335	1.19337	0.001	0.162051
115698626	7.42341	0.156687	0.86521		115695968	26.6879	68.2346	53.1909		115704824	3.08912	6.57623	2.12431		115709009	353.707	71.2439	526.048		115714295	3.0941	17.5131	9.99101		115724767	4.77427	0.001	0.001
115724733	1.88538	0.075069	0.220582		115705598	110.585	244.854	90.0741		115708984	0.412504	1.20571	0.0100573		115697573	0.403139	0.001	1.95145		115718961	60.8677	46.9713	196.549		115698716	27.5838	128.158	3.72887
115710226	473.368	0.069776	55.2771		115694999	0.347652	0.88582	0.930776		115711336	7.52125	13.3168	4.3026		115721211	15.3765	1.55255	3.16434		115703936	0.43142	0.546734	1.39064		115718594	5.41072	0.145527	0.733446
115717403	2.76764	0.0464187	0.325167		115722305	38.9261	157.198	86.8418		115700348	23.3177	129.532	10.4221		115720846	13.3045	0.19161	2.73997		115711390	2.50922	3.74312	8.09692		115712395	1.28409	0.270466	0.196977
115724653	10.1912	0.383164	1.19655		115708023	2.69304	6.86653	4.20433		115701309	8.14787	14.331	4.63881		115713181	4.5461	8.17024	21.8818		115703632	1.2666	2.4129	4.08594		115713079	111.594	3.19153	15.1238
115717110	1.35277	0.106322	1.98421		115698658	39.2844	100.151	52.7526		115714532	19.4363	34.6629	11.2352		115709447	0.290558	0.0134797	1.39183		115718298	2.24292	3.59166	7.2336		115701222	2.1484	0.001	0.292669
115707401	5.69903	0.049946	0.670407		115713035	12.2093	61.7876	5.77058		115725449	25.3567	67.1238	21.774		115708084	11.8001	1.48843	10.8572		115702623	1.39434	7.11952	4.49449		115695449	2.01515	2.2948	0.274712
115698312	3.43707	0.001	0.406412		115698442	5.49976	13.9992	7.97116		115706408	24.3743	47.7253	10.9125		115697076	1.67026	0.265282	1.92751		115723447	4.1433	19.8276	13.3577		115706775	7.4604	2.48199	1.01504
115698033	9.01217	2.36977	1.06622		115711527	1.01757	2.58826	1.77873		115704068	1.07255	6.07048	2.50283		115711635	5.12643	0.651956	4.7375		115716365	0.383542	0.073081	1.23367		115717012	2.51701	0.141601	0.343898
115695924	24.2606	4.15299	2.89067		115706592	179.49	448.046	165.909		115719395	28.7494	47.1957	12.891		115714293	0.757987	0.149281	3.63079		115706387	1.16376	0.803159	3.74758		115713923	9.10794	1.00755	1.24447
115702747	6.1594	0.496373	9.12731		115716445	7.42131	18.873	11.5785		115721847	1.93368	8.11819	2.64231		115720660	12.702	2.99296	21.7377		115710072	24.1077	19.2416	77.6693		115716337	94.7874	22.62	12.9569
115698604	1.12709	0.210533	1.15674		115695799	1.06629	3.98389	1.47628		115698801	30.9505	95.5903	31.1236		115712283	8.4827	5.47306	40.6691		115712724	3.76124	2.58728	12.1142		115723729	1.0772	0.437316	0.148152
115721778	11.7431	0.394584	7.24254		115713002	68.2417	173.546	88.1286		115699751	18.9682	56.8093	18.5054		115702531	5.13811	2.04188	24.63		115719543	2.14606	2.68639	6.90993		115701338	70.6035	97.9508	9.66424
115716411	0.802544	0.15025	1.49234		115711213	1.36771	3.4746	3.88032		115707582	2.99121	52.214	6.96269		115706071	15.0669	0.44559	3.10832		115703995	44.1136	33.3981	141.99		115724118	4.38157	0.148098	0.601023
115704720	2.55107	0.0378537	0.305352		115716342	13.2766	33.7391	17.6228		115716643	6.90397	24.2627	7.9128		115712365	6.20318	1.44742	29.7199		115706108	29.8882	20.4619	96.1006		115715751	24.4137	11.407	3.34828
115708244	2.25341	0.0464577	0.27048		115709411	34.9619	75.695	28.0631		115708510	9.15923	35.1574	11.5038		115714819	16.5494	3.24608	23.5105		115700649	3.04961	5.21148	9.80311		115714347	17.9263	1.72998	2.46211
115723029	167.72	8.22782	150.905		115716656	7.27021	18.4285	9.74785		115709967	9.52001	20.1448	6.59631		115695566	11.5458	2.79139	20.1814		115721290	178.003	69.2851	572.295		115699485	6.97194	0.65926	0.958545
115709441	2.59143	0.484259	0.311321		115716737	7.8834	22.2461	8.25707		115707942	7.31877	19.8896	6.52644		115714245	0.36194	0.083741	1.7269		115699857	9.17711	11.5626	29.4989		115695654	18.9997	1.22602	2.61134
115696310	54.8648	1.64368	30.088		115720966	30.7017	87.1261	32.3582		115707741	5.41598	186.087	12.5909		115712505	9.90761	0.242954	2.04606		115716937	7.32122	4.22066	23.5006		115701393	3.45777	0.001	0.4761
115713399	2.4171	0.001	20.261		115713990	7.59478	24.5248	9.10907		115701215	3.00665	38.3045	6.96365		115701158	0.995013	0.001	4.74794		115715881	6.54491	4.41888	21.007		115722495	7.054	1.8079	0.970443
115707630	5.32088	0.623192	0.638719		115722136	0.001	3.07581	0.001		115707707	5.92093	13.4754	4.42451		115714772	7.33869	1.30088	9.39938		115714071	9.3277	20.6748	29.9273		115711998	4.28533	0.052037	0.59043
115704263	9.85921	1.48204	5.16805		115720646	1.35196	6.04438	2.24714		115722444	2.21163	9.76337	3.20884		115725560	0.611118	0.294049	2.91167		115722566	4.99602	2.31921	16.0254		115704970	9.58071	20.1651	1.31913
115706835	13.1879	0.001	1.59234		115721302	5.32455	13.4601	8.08198		115699680	71.5939	110.758	36.4037		115713651	14.3651	17.5805	68.5022		115708487	6.22274	13.7278	19.953		115706020	39.6901	141.804	5.46332
115696510	5.20711	0.740754	0.632635		115705994	20.3867	60.4036	22.4718		115697569	11.2537	52.7684	17.4201		115719016	0.304381	0.263212	1.44749		115705212	2.57504	2.28229	8.24789		115723258	173.815	15.4022	23.935
115705033	12.284	1.18128	21.5715		115698174	11.4954	27.2405	5.45849		115708105	1063.05	8839.14	479.85		115698152	3.06308	0.404047	14.5928		115725467	17.5979	0.891443	56.3753		115724435	1.85911	1.03459	0.256919
115725780	13.4049	0.732613	1.6314		115705459	21.9423	65.6474	24.4677		115719351	60.9589	184.724	61.1866		115716527	2.363	0.033525	0.491054		115718161	5.69569	2.54212	18.2084		115699402	22.2588	4.62525	3.06867
115699516	95.1304	3.03971	55.4003		115712480	0.885171	2.22482	1.86318		115699539	4.23991	5.53463	1.91572		115705728	1.15882	0.869116	5.506		115708372	6.71897	22.9571	21.4566		115705594	41.9631	74.2321	5.78894
115700336	1.08404	0.0834543	9.05293		115717087	3.2215	6.73199	2.52016		115711506	10.3169	22.702	7.54688		115712240	0.609447	0.001	2.89156		115699354	14.976	30.1321	47.8063		115695894	8.23154	0.733168	1.13681
115709471	1.84047	0.632423	0.225014		115724511	14.192	35.602	22.049		115697189	5.92698	29.8086	9.92471		115705753	20.6712	4.20847	30.1997		115716302	1.58148	0.90984	5.03719		115711158	33.7261	25.98	4.66495
115723376	9.73084	0.001	1.18835		115705138	4.24156	11.2907	4.22855		115716725	13.6763	35.3817	6.19275		115710202	9.05937	1.46825	10.5267		115716061	2.2505	7.10005	7.16802		115710152	19.4502	1.43266	2.69344
115723381	5.7832	0.119517	0.707135		115716764	2.68841	6.74128	4.71478		115722823	80.1037	153.765	51.3266		115706122	1.76873	0.001	8.38949		115718286	5.03651	7.07678	16.0391		115709006	1.97115	0.706177	0.27387
115712775	8.41174	0.69441	70.214		115694717	11.0334	24.3235	24.4569		115723362	11.214	66.8745	22.3704		115710174	49.393	2.40872	10.301		115705436	10.1757	10.4575	32.3959		115725545	16.3577	6.22309	2.26814
115724125	1.04159	0.426279	8.66676		115706752	9.64573	28.9639	10.8705		115700896	10.9771	33.0994	11.107		115711530	9.04502	0.819503	5.87101		115716392	10.8389	16.3794	34.5003		115699181	2.96055	0.052012	0.411249
115719041	1.81861	0.240599	15.1028		115711241	12.8268	38.0783	14.321		115699990	6.33139	13.6843	4.59283		115707209	8.81293	1.90885	13.6508		115712763	1.17991	0.305395	3.75075		115700724	14.669	0.349741	2.03512
115704680	1.39388	0.264435	1.17907		115702857	12.823	38.5991	14.5195		115700697	4.78947	14.4915	4.86388		115705039	0.32656	0.001	1.53923		115705712	4.89663	12.8574	15.5714		115698783	3.49472	29.5753	0.48579
115694767	155.895	0.653039	19.0663		115721176	1.31977	4.45193	1.67598		115723433	18.3707	38.1415	8.33758		115717046	3.5082	0.001	0.736045		115715635	10.1763	12.7474	32.3522		115704317	1.43001	0.001	0.199428
115707897	1.20353	0.073781	0.148284		115707557	5.04027	16.4836	11.153		115699851	10.627	47.9158	16.0935		115718981	10.5728	13.4846	49.7146		115709844	7.70371	7.86729	24.4696		115701515	20.9171	31.171	2.91122
115721157	9.08586	0.191618	1.11476		115711459	20.8017	83.105	31.3749		115694861	10.051	25.772	8.66331		115719696	2.26584	0.372251	2.64777		115710139	0.598425	1.17067	1.89847		115702801	5.56015	1.19217	0.775597
115722822	4.91216	0.632404	0.603138		115721166	5.22967	11.9649	4.51931		115722522	12.7664	20.9616	7.05783		115707481	9.18664	11.8765	43.0932		115704192	5.89821	2.24304	18.6981		115701490	14.6405	11.2442	2.04141
115702373	3.97118	0.302048	5.39401		115717997	0.415555	1.03324	0.535091		115699246	49.4173	65.6476	22.4288		115712444	2.76407	0.437804	3.10735		115725443	1.82875	8.19662	5.79351		115720645	32.4251	0.350788	4.52495
115706083	11.3991	0.759254	13.5464		115698896	4.53338	10.0203	10.0265		115711631	2.48652	5.72569	1.1292		115698515	8.54834	7.59357	40.0222		115725610	3.96781	3.38908	12.5526		115698766	43.068	23.4249	6.01602
115707780	4.4139	0.402352	0.54248		115701977	4.93804	18.3853	10.9214		115697308	5.55327	16.6602	2.52357		115698690	0.987272	0.743992	4.61441		115700647	0.714486	1.36491	2.2574		115714338	20.35	1.82816	2.8451
115708744	5.99048	0.486475	8.6399		115722499	19.9413	52.8448	44.1015		115718911	26.3509	86.1976	29.0668		115711977	16.8049	4.20614	78.5913		115725170	3.27544	60.7689	10.3538		115705455	29.0238	0.198054	4.07219
115700465	13.4651	6.23867	1.65823		115725305	13.6692	47.9029	6.51592		115709352	1.4903	2.95698	0.997934		115705444	18.3792	1.60201	3.86678		115714941	2.52489	0.548466	7.97855		115708103	4.89462	0.037533	0.688959
115706494	16.4686	0.0821083	2.02962		115697864	99.1426	305.694	115.793		115723011	23.4952	63.9464	21.6007		115716706	12.5892	1.58829	11.2589		115705258	0.558845	2.52828	1.7638		115725167	1.44694	0.240714	0.204905
115709596	2.5385	0.894797	0.314461		115705163	37.2529	92.4965	61.607		115709863	87.0149	136.114	46.0145		115708908	6.11374	0.715715	28.5707		115721418	4.1416	10.5915	13.0787		115705703	66.2162	4.48672	9.35344
115721919	10.5977	1.15154	87.1336		115697523	8.39805	20.8388	14.0109		115721314	5.40218	8.13858	2.45922		115697798	7.26926	1.52419	10.758		115699098	15.2809	38.1622	48.256		115712038	6.61618	5.14325	0.935519
115709619	316.04	122.237	39.0604		115722569	17.8777	35.8249	13.6021		115699796	47.4	92.1069	31.1626		115721934	11.8596	0.356516	2.49547		115704752	0.641824	0.001	2.02377		115723312	4.33735	0.001	0.6153
115704933	7.04901	0.0464163	0.872975		115714362	24.1914	59.8846	34.351		115704169	11.0704	37.9822	12.8554		115700711	1.54256	0.497941	2.41294		115721806	22.347	28.4675	70.4993		115707982	41.631	2.84419	5.90973
115710396	4.46429	0.695057	2.51208		115706297	4.60294	11.3703	7.49342		115700848	33.8681	94.233	31.8949		115698285	31.7734	0.875846	6.70207		115706251	15.8374	21.5702	49.9519		115710084	5.94113	0.970533	0.844597
115698258	2.19786	0.001	0.274317		115715085	51.8619	127.941	67.8331		115720743	8.04342	72.8418	3.66886		115711860	0.776116	1.38836	3.61919		115705992	6.5359	7.16053	20.6075		115717378	20.2471	10.0318	2.88202
115710061	1.53697	0.001	0.1922		115714846	9.60227	29.1237	21.1719		115714189	38.7869	88.2333	17.698		115705787	2.6417	4.02175	12.3166		115698212	0.961034	1.72784	3.02685		115711557	12.6358	8.8835	1.80107
115705038	22.821	1.99729	2.84309		115708615	1.31453	2.89677	1.10364		115712843	75.3012	285.051	96.5318		115711317	4.12402	1.15479	8.14347		115702364	46.07	8.81348	145.174		115714882	29.8399	3.64015	4.25511
115706085	7.73214	0.534133	9.39168		115709874	2.78276	6.83849	4.32552		115716868	22.8329	57.8123	10.4255		115718688	74.4419	62.243	346.458		115716339	4.08744	14.7741	12.8732		115705602	1.26334	0.71044	0.181567
115706421	352.492	0.27178	43.992		115709276	43.0135	108.923	20.5342		115717366	9.5006	29.4949	10.0187		115722011	1.28241	1.59554	5.9473		115724360	1.50759	4.45718	4.74551		115715219	4.16111	3.05174	0.59653
115709626	2.30107	0.203472	3.53933		115709930	0.558198	1.36898	2.03534		115719261	30.1486	130.591	44.3975		115696554	12.2003	0.640563	2.58476		115710644	84.3523	8.76378	265.376		115699046	9.54746	0.090875	1.36831
115708155	5.41063	0.106061	0.676195		115703151	19.2706	47.3061	36.3567		115716022	28.5149	57.6275	19.606		115698620	0.942549	0.61738	4.3674		115724484	0.941999	0.918205	2.96101		115724694	1.02356	3.02239	0.147603
115696277	2.07669	0.32608	0.799442		115707703	39.0211	95.6984	51.0936		115719138	2.51126	12.1166	4.13048		115707298	0.457412	0.515565	2.11014		115711957	7.91187	0.001	24.88		115714064	31.4271	3.6296	4.50692
115715330	6.78661	0.210183	0.850594		115700593	10.5434	28.3152	23.1729		115715258	16.6138	28.9752	7.59119		115706247	1.3013	1.80875	5.98907		115715788	0.301383	0.508319	0.944939		115697128	1.6004	0.001	0.230336
115697808	4.09736	0.068726	0.513967		115705125	31.3046	103.009	39.353		115711414	2.40847	8.57412	2.92663		115712999	8.26774	0.001	1.76195		115710164	0.488283	1.07408	1.53093		115716254	76.2926	293.671	10.9549
115716754	75.795	10.6551	9.50326		115701208	3.41342	8.64483	3.30779		115707240	2.35301	5.08084	1.73504		115709153	5.42044	1.62792	24.9133		115724729	1.4055	5.20501	4.40874		115699125	18.7304	0.399699	2.69114
115725526	7.13823	0.469387	7.9879		115725420	2.77031	7.364	2.81915		115712299	2.23662	8.17962	2.79286		115722973	5.84968	2.2437	26.8515		27215450	9.21644	10.3464	28.8982		115703793	1.12414	0.25085	0.268551
115703642	26.0259	0.844469	14.2873		115705582	14.3391	65.0141	24.9202		115719524	4.59092	34.8999	2.10029		115713472	0.209586	0.001	0.958142		115702940	1.22714	0.664734	3.84367		115715485	0.57757	0.91716	0.0839643
115719565	10.7212	1.67808	1.34588		115720835	1.9249	9.67607	3.7129		115699457	9.76487	25.0213	8.56701		115715971	14.1997	2.75416	19.0756		115697346	12.3403	9.16941	38.6695		115716883	25.0257	13.5501	3.60286
115719005	1.7154	0.277113	1.08556		115719697	20.9496	51.043	31.9345		115701249	15.836	35.142	12.0495		115724974	11.4833	6.17193	52.6571		115701704	3.82493	12.2809	11.9829		115709045	241.433	411.793	34.8628
115698911	92.4353	0.645603	11.6371		115722804	3.67544	8.63205	3.32093		115716460	23.2602	42.6068	14.6118		115702990	3.26801	0.001	0.700054		115706099	0.978497	1.56857	3.06252		115719788	2.79568	3.12166	0.404578
115694961	10.3325	1.29761	82.4631		115717667	1.44614	4.37749	3.17113		115722763	13.364	90.3132	30.5097		115698169	10.1565	0.900018	2.17705		115703195	4.65272	9.18684	14.5583		115700242	112.527	99.9793	16.2535
115718020	3.70408	0.360995	5.9031		115711662	4.46945	9.97682	9.80085		115706496	0.620998	1.8051	0.620687		115715684	44.9979	23.3496	206.037		115706286	0.342493	1.04312	1.06945		115716326	36.3836	0.001	5.25999
115702677	5.9802	0.475952	7.76205		115713909	40.4819	102.859	39.7924		115718476	2.7026	53.1589	6.14676		115705267	3.63992	1.80202	16.6534		115710110	3.04469	3.6078	9.5207		115705843	20.9386	3.41738	3.0306
115707428	16.1068	0.86454	14.0836		115708024	4.96763	36.5354	10.8878		115725652	41.981	180.758	62.1377		115714217	15.9999	1.0545	73.2078		115710234	0.543176	0.001	1.69407		115702746	2.75723	0.745779	0.400475
115723426	2.41612	0.24103	3.90849		115721985	2.19341	10.3732	4.022		115719253	36.0004	98.2984	33.873		115705067	102.958	8.26277	56.948		115704983	3.23667	2.86325	10.0989		115712114	6.61801	0.0987443	0.961413
115695606	0.237369	0.001	1.88618		115698615	0.913809	2.2012	1.80772		115709261	10.1091	12.3654	4.63468		115718516	1.61914	1.16598	7.40379		115724802	0.749907	3.46629	2.33611		115698313	5.83822	2.31812	0.848825
115710739	1.29064	0.105981	1.70859		115695886	22.8479	48.3588	18.7691		115719514	23.1751	54.2942	18.7404		115705443	5.51129	0.325783	1.18213		115725298	51.8658	11.4835	161.694		115715484	155.285	215.978	22.6002
115709461	3.3694	0.001	0.428024		115721719	19.1843	46.211	30.4516		115695889	163.419	264.021	91.1626		115712198	4.2445	5.34111	19.3985		115712688	4.89786	9.84818	15.2562		115715005	8.50757	0.287757	1.23977
115717375	14.285	0.641005	1.81555		115707524	9.13801	22.3004	19.9962		115722350	2.00867	2.8375	0.924251		115714814	9.0884	1.07324	7.37678		115721278	19.4475	53.4539	60.5691		115718518	5.32418	0.478841	0.776929
115701238	2.00678	0.001	15.9737		115712780	6.91693	16.6473	12.7861		115721225	2.10889	4.72659	1.63367		115721712	7.2261	11.7316	33.0156		115706668	53.324	8.08647	166.011		115695754	4.3203	0.709767	0.630988
115707884	5.17377	0.001	0.659755		115698597	17.0002	58.5285	22.7755		115706908	43.1505	45.0975	19.8593		115721937	1.66721	0.937295	7.60714		115711644	2.62491	10.1671	8.16113		115711594	2.42721	11.2868	0.355638
115723006	7.72211	0.267284	0.986162		115707725	3.13413	15.7282	6.12402		115699266	27.3221	100.399	12.5958		115711993	275.093	50.6603	347.886		115722963	2.12768	0.142508	6.61372		115724186	4.91895	0.03165	0.720473
115712477	1.6	0.147457	0.205269		115702924	4.58632	10.0266	10.0267		115717013	7.29748	24.5263	8.47572		115707162	3.44089	0.459603	3.14753		115722036	4.0146	1.47239	12.4803		115702625	12.9253	2.59725	1.89312
115719667	202.777	28.3124	26.1194		115723363	1.99836	4.09523	4.36508		115717421	336.859	1337.53	463.389		115697171	13.272	1.24513	8.52449		115720113	0.653197	0.197923	2.024		115718668	1.7485	0.001	0.257286
115707962	56.3495	15.4512	7.26202		115706627	14.556	37.2067	14.5018		115707197	38.146	69.1296	23.9757		115698219	11.7165	1.44613	9.87235		115700712	15.7218	49.6968	48.7484		115698132	37.2449	1.19946	5.46357
115714582	3.62842	1.59781	28.6957		115718703	1.7969	8.8274	3.44803		115719685	254.286	391.415	135.909		115707726	61.3737	11.502	78.3356		115716329	47.6682	90.649	147.808		115695852	5.36128	3.12802	0.788897
115706886	15.299	0.208086	1.98174		115711065	2.01911	4.82821	3.16991		115719301	24.8943	75.5487	26.3243		115697539	12.8082	25.3157	58.4481		115712010	1.0325	2.09409	3.19878		115707243	31.4133	10.7316	4.62375
115711294	11.7149	1.00321	15.8082		115717102	0.257129	1.0956	0.429139		115721304	9.90528	33.9779	11.8498		115704769	0.493854	0.117728	2.24656		115706685	2.80619	4.23137	8.69648		115714658	20.7188	2.66391	3.05172
115714466	9.40615	0.001	1.22913		115707753	41.0153	84.1618	32.9256		115725606	3.65244	12.279	4.28384		115702620	9.64238	1.61093	10.9188		115711627	7.20422	9.40631	22.3005		115699555	5.48924	0.542376	0.810444
115716407	26.98	0.625419	3.52419		115697881	6.58708	37.5797	14.3537		115707740	20.3356	62.3396	21.7489		115714464	23.3225	2.19361	14.8115		115707433	14.1033	30.8061	43.6543		115718721	3.18791	2.26309	0.471352
115716159	2.39333	0.097203	1.49513		115712167	8.44514	20.1865	15.9444		115711408	2.99306	5.2422	1.82959		115716749	2.12701	0.279548	1.88187		115716623	9.67619	29.4565	29.9042		115705273	1.96253	0.218411	0.290947
115715585	5.78424	1.79208	0.759289		115712227	0.0818153	1.11814	0.43828		115698575	17.1922	49.6187	17.3546		115701871	1.39215	0.346764	2.33403		115694774	65.4977	126.172	202.41		115699504	1.66564	0.001	0.247133
115700771	6.22681	1.86158	48.6221		115707419	2.70181	10.0534	5.88466		115710389	22.5696	49.7397	17.4376		115717368	2.18128	1.70788	9.91796		115718764	17.2208	23.3464	53.1954		115710015	7.92946	0.425687	1.17353
115720543	10.4952	1.45976	1.3802		115709643	4.76993	11.3964	7.94425		115715843	95.9053	157.835	44.5552		115704104	8.79894	1.35258	9.11326		115714305	0.466862	0.296517	1.69954		115704951	4.00237	0.839568	0.592894
115705733	7.30974	0.11905	0.962837		115718950	6.69768	18.955	7.43727		115695695	110.456	294.442	103.443		115698016	27.7745	2.26677	5.96808		115700067	150.89	305.682	466.065		115701166	55.7991	3.41783	8.25796
115720702	7.73284	0.403813	6.23921		115718955	55.7676	213.505	83.8095		115719169	1.33089	5.23947	1.84591		115709311	18.5792	0.32302	3.99287		115719422	13.4586	6.50089	41.545		115700720	16.8242	0.504572	2.49104
115711379	12.9909	0.42754	6.60193		115715140	2.91221	6.95111	4.01753		115697386	6.18687	9.6784	3.41571		115700446	22.2017	2.53654	17.0582		115701745	0.499762	5.04451	1.53916		115711171	10.4529	0.510041	1.55047
115706345	5.76502	0.001	0.762371		115709811	1.66966	14.5035	3.63373		115725636	28.008	47.1836	16.6582		115719396	1.95793	0.504004	3.37101		115725644	1.18233	3.98225	3.64358		115708332	21.4264	1.04746	3.17911
115705527	1.15206	0.194893	0.120717		115725767	3.83296	9.14112	4.67711		115715748	6.49232	16.6517	5.88489		115697353	1.55866	1.73385	7.08365		115706979	1.46092	4.74549	4.50206		115707516	5.43924	0.162653	0.810843
115704790	1.81496	0.001	0.240929		115706411	2.94359	10.4845	6.40659		115705596	161.901	369.634	130.679		115723435	2.67297	6.01453	12.1484		115712420	7.17372	11.8463	22.1054		115700735	1.2836	0.435243	0.192025
115713887	5.81241	1.47897	0.77132		115700458	76.6307	224.908	88.2937		115697679	24.7542	39.7702	14.0695		115698802	1.0949	0.296774	1.98049		115702624	1.60487	3.1054	4.94289		115709235	5.42376	0.0833497	0.810939
115718760	12.4691	0.796505	12.235		115719188	21.8217	52.0298	38.3738		115706638	6.77215	7.31095	3.14976		115699406	9.76982	12.7799	44.3515		115721590	2.5379	7.1129	7.81519		115708172	10.412	0.693256	1.55632
115722833	5.30537	0.408125	6.24262		115699614	2.0287	30.4193	4.41303		115695173	8.34016	12.1736	4.3315		115719371	42.2209	12.0076	80.2834		115724089	9.57812	20.575	29.4986		115707496	116.745	5.79502	17.4419
115718332	4.96388	0.247707	0.661003		115724347	2.1401	5.09755	3.64698		115705722	13.9506	27.4412	9.78039		115705158	1.96509	0.935171	8.91225		115715666	4.09943	5.57415	12.6238		115702448	4.09548	0.001	0.613525
115707045	3.77028	0.223293	3.39902		115708499	13.4789	32.1092	18.6855		115715194	66.1624	156.44	55.7756		115706933	17.5418	2.60776	17.3617		115723033	32.5731	13.4757	100.274		115711588	51.8598	17.1802	7.76001
115709859	5.69566	0.470952	7.1776		115699133	25.3233	50.9544	20.0438		115702377	17.9414	32.5419	11.6161		115699729	1.32218	0.316532	2.0976		115705921	3.36626	0.543067	10.3601		115702881	10.2441	10.0281	1.5337
115702726	13.5428	0.279984	1.80296		115697401	9.80148	23.3304	12.4957		115714600	37.7947	119.468	42.745		115698289	34.2184	3.06322	7.38694		115707480	5.47761	7.07787	16.8363		115706571	33.4579	29.416	5.00744
115708719	10.8114	3.60222	1.43999		115697296	14.845	35.2304	19.7611		115717270	20.702	33.3118	11.9215		115708207	23.5366	1.41663	5.08624		115711524	1.79878	3.53868	5.52191		115705642	50.4837	4.48488	7.58553
115697475	5.31575	0.674922	10.2526		115701326	7.18181	17.0188	10.7058		115722289	14.4186	25.1329	9.00183		115698516	11.0377	10.3896	49.9973		115703014	22.7542	32.2346	69.8662		115719323	5.44747	1.08406	0.819722
115723144	31.9704	1.10043	16.721		115699418	14.5179	147.548	31.5259		115705669	5.96822	10.7417	3.85015		115697847	3.95554	5.3798	17.8881		115712511	13.4375	30.8661	41.2459		115696250	9.52266	0.212955	1.43755
115709313	53.0769	4.08023	7.06823		115715805	1.40495	2.83183	1.12329		115711256	113.617	182.119	53.0238		115722121	66.5271	39.8509	300.884		115705022	2.71919	4.23392	8.34346		115708280	22.8604	1.23058	3.45276
115716825	2.56549	0.557726	0.342883		115700732	29.4723	69.641	50.1172		115714041	14.4266	22.7136	8.16427		115702972	12.2323	2.14964	14.1977		115706578	8.44466	3.1275	25.9058		115724075	16.2164	9.19531	2.45027
115699904	25.984	3.05143	46.1152		115722443	5.53454	18.5374	7.38456		115696801	1.32211	7.58522	2.72804		115718470	20.0678	0.660084	4.34229		115698775	0.720303	2.45382	2.20686		115703651	6.09797	0.0294913	0.923062
115708827	2.70512	0.279984	4.20996		115705878	17.5953	38.5594	8.51306		115697404	2.34709	7.35754	1.09682		115697461	3.40709	0.580713	3.82753		115707482	2.54323	2.75187	7.79302		115715106	1.2204	0.286768	0.001
115723032	7.94364	0.0618923	1.06019		115721750	0.362014	1.70012	0.679459		115701291	27.4481	54.2799	19.5427		115696959	17.1182	0.65771	3.70537		115722116	6.56863	18.1155	20.1292		115714877	13.3796	1.54297	2.0275
115719644	5.3157	0.588725	8.811		115710290	0.63192	2.21967	0.30653		115701285	11.3737	33.9206	5.31506		115708277	13.7909	0.8755	2.98555		115705912	9.37292	18.7499	28.7195		115719770	70.1929	6.11723	10.6393
115700641	4.6894	0.298926	4.46501		115706542	15.5276	36.5933	20.9732		115710629	7.59555	30.9729	11.2043		115709190	2.71897	0.647847	4.25666		115707638	3.51208	1.63928	10.7593		115708330	4.75873	2.57347	0.724082
115715133	50.7332	5.10316	6.80029		115710316	2.04646	4.13813	1.65544		115725303	7.40236	14.2996	5.17419		115721701	0.753434	0.395446	3.39717		115719819	0.819136	2.90114	2.50735		115697761	29.9446	26.9035	4.5521
115710195	22.0351	0.099263	2.95645		115703872	4.46181	10.512	7.00777		115703056	10.6828	17.6193	6.37761		115700485	19.9938	5.25051	34.4897		115708713	1.83466	4.91957	5.61289		115723607	8.56347	0.242148	1.30361
115723489	6.56624	0.001	0.883101		115717146	5.95371	27.5929	11.0376		115712478	27.215	76.5794	27.7521		115719046	4.76417	1.2683	8.32509		115716252	1.23176	12.0063	3.76611		115724901	204.656	59.2665	31.2092
115714434	1.82819	0.316962	0.030904		115712642	40.6619	210.471	19.6976		115702987	9.61872	16.9411	6.15011		115700390	62.9953	4.52183	13.6668		115701259	4.89336	3.05469	14.9479		115714280	5.61365	10.9652	0.856919
115704199	2.23001	0.293009	4.3577		115719048	21.9099	51.5678	40.2742		115704249	13.5221	46.262	16.7962		115707633	1.56545	3.0944	7.0571		115702340	3.93502	4.74271	12.0194		115700658	20.873	3.26807	3.18441
115715335	1.19337	0.001	0.162051		115712101	1.82671	4.04533	1.62071		115708695	50.8492	156.201	23.8123		115705152	0.288468	0.0967747	1.13584		115702904	7.17633	7.48867	21.9189		115708941	5.18041	0.001	0.791051
115721861	0.991597	0.104616	7.53221		115711438	19.151	43.4308	17.4081		115712139	11.3824	27.2702	9.91524		115714552	34.2182	0.001	7.43133		115713020	62.4282	27.2946	190.658		115704533	3.38018	0.645761	0.516965
115702519	2.55298	0.251406	3.70543		115702730	4.50176	10.5577	4.24		115707077	4.36165	24.421	2.04518		115696898	5.16552	5.15401	23.2577		115706012	11.2492	13.4861	34.3421		115721852	13.2355	22.5471	2.02528
115724767	4.77427	0.001	0.001		115712125	7.92771	20.6668	8.30262		115694690	21.3813	62.645	22.7976		115718403	3.06631	3.0629	13.8013		115709098	4.13455	6.54071	12.6145		115695939	99.9482	85.061	15.2981
115718594	5.41072	0.145527	0.733446		115703582	15.68	291.16	33.9485		115703576	18.5328	42.3005	15.4165		115706844	3.8126	0.749493	4.88412		115702725	8.27556	4.74343	25.2472		115699482	48.8755	1.50217	7.48417
115712395	1.28409	0.270466	0.196977		115714511	4.11511	11.4246	4.59645		115704693	8.88232	13.5936	4.9565		115725304	6.57897	2.37885	29.5969		115699452	3.1845	0.484463	9.70583		115701378	29.5461	0.563444	4.5259
115713079	111.594	3.19153	15.1238		115701250	7.20561	18.8265	15.581		115695945	23.86	31.0249	11.2168		115698723	69.2107	9.07954	59.0352		115711417	6.495	18.5144	19.7739		115722722	69.1664	10.6858	10.6123
115701222	2.1484	0.001	0.292669		115705789	112.202	262.819	151.991		115721916	3.58857	24.5786	8.02939		115705749	3.96094	0.475333	3.07872		115708256	2.1831	0.669403	6.64462		115702776	5.92253	0.0329523	0.909819
115708722	0.350677	0.0163557	2.64025		115718972	25.6835	60.1557	39.5425		115702645	13.8507	14.3676	6.5149		115706587	0.994584	0.424907	4.46799		115702848	9.36451	2.91561	28.4706		115698223	13.6248	0.240471	2.09664
115706775	7.4604	2.48199	1.01504		115701358	181.705	425.574	321.178		115718791	35.0749	142.564	52.0798		115707825	46.5143	11.6404	75.4384		115714717	4.73767	19.2194	14.3936		115715250	10.865	0.307929	1.67414
115717012	2.51701	0.141601	0.343898		115716653	3.24587	11.7725	4.75017		115708497	6.79663	33.3149	15.2001		115711674	1.42633	0.238496	1.53638		115698816	12.8846	2.57864	39.1355		115699388	22.4463	29.9215	3.45929
115713923	9.10794	1.00755	1.24447		115706227	8.805	22.1003	8.9282		115699645	23.1088	74.7568	27.3939		115707732	8.06588	0.321844	1.76097		115707576	0.908341	2.18079	2.75414		115707999	13.6842	1.01235	2.11531
115716337	94.7874	22.62	12.9569		115694730	8.2399	38.0789	15.3966		115703728	23.7648	31.2691	11.2129		115714099	24.9459	0.477057	5.45165		115715251	1.98188	1.89161	6.00839		115700717	18.5305	106.701	2.86491
115724118	4.38157	0.148098	0.601023		115709338	0.927527	2.16849	1.51555		115714068	22.1166	32.8447	12.0805		115725407	0.900118	0.23232	1.49397		115719280	11.107	13.6173	33.6594		115707511	5.88596	0.833397	0.911093
115724127	16.1873	1.03248	15.0457		115716674	3.70362	8.65973	4.97041		115705598	110.585	244.854	90.0741		115700623	4.89612	2.62947	21.9979		115719740	0.325136	0.388958	0.983179		115724721	12.6896	38.6517	1.9645
115712070	1.70698	0.190893	2.76402		115700478	43.0931	170.649	93.0572		115698649	17.2125	29.0719	10.6959		115696217	53.5001	7.30279	47.0692		115707611	4.77491	1.53291	14.4663		115714491	278.408	34.2932	43.0841
115715751	24.4137	11.407	3.34828		115714222	11.0439	25.7945	13.2858		115707800	4.99494	7.88095	2.90084		115721324	16.5546	1.32807	3.61951		115699102	0.293814	1.09999	0.888189		115705117	4.90645	0.281708	0.760391
115714347	17.9263	1.72998	2.46211		115706645	30.7739	72.2242	29.2363		115706614	3.47984	6.87906	2.5392		115719290	2.39674	1.61653	10.7548		115707543	62.1592	3.1992	188.332		115717451	37.7832	1.98869	5.86484
115708338	1.61205	0.591044	12.0699		115707392	15.7816	36.7788	28.3993		115713035	12.2093	61.7876	5.77058		115706861	77.0549	5.11361	16.992		115697498	16.784	14.3524	50.8293		115705677	29.0434	44.1914	4.5139
115699485	6.97194	0.65926	0.958545		115712853	4.40649	14.6783	5.94643		115705668	5.33544	9.85889	3.64889		115711940	9.56372	1.87801	11.9839		115694903	1.52423	0.001	4.61359		115712575	446.53	49.2111	69.5473
115695654	18.9997	1.22602	2.61134		115699554	42.4939	123.769	20.6368		115706592	179.49	448.046	165.909		115709345	8.16593	1.87235	36.5855		115709983	3.03676	2.49293	9.18355		115706143	6.22883	3.54177	0.971499
115701393	3.45777	0.001	0.4761		115699417	15.0607	53.8503	21.8185		115695799	1.06629	3.98389	1.47628		115701356	0.529509	0.754275	2.36906		115721703	5.41511	13.1348	16.3759		115717257	1.47547	4.64714	0.230804
115711391	5.46796	0.178622	2.58272		115697869	7.32942	18.9753	7.68958		115709411	34.9619	75.695	28.0631		115709418	3.73813	0.246787	0.827016		115695048	1.2304	4.66837	3.71886		115712355	4.9475	0.331959	0.772995
115722495	7.054	1.8079	0.970443		115707612	2.34905	7.00185	5.05996		115716737	7.8834	22.2461	8.25707		115712414	6.64436	0.001	1.47041		115706437	2.44831	1.78998	7.39113		115712676	5078.52	10214.7	793.01
115711998	4.28533	0.052037	0.59043		115725406	4.85904	10.8093	4.38414		115720966	30.7017	87.1261	32.3582		115704384	21.7288	27.3218	97.173		115699430	0.394744	60.4355	1.18811		115703819	12.8227	2.82186	2.00363
115724603	10.3695	3.6907	77.6068		115700617	7.61233	17.6298	10.5735		115713990	7.59478	24.5248	9.10907		115719070	7.1005	1.20454	7.64497		115712786	56.591	17.0441	170.611		115695895	69.8794	65.7488	10.9504
115708135	4.28199	0.61955	31.9717		115722975	71.3486	165.136	84.6893		115722136	0.001	3.07581	0.001		115719260	10.9134	12.7804	48.7522		115705643	7.32508	4.72813	22.0762		115704097	13.9551	0.731219	2.18922
115711982	2.89146	0.122476	1.75504		115721873	5.29717	12.6957	5.15336		115705445	13.2057	20.9279	7.77402		115716563	51.3252	14.5951	92.4156		115695769	5.98295	9.39444	18.0063		115719443	2.39437	0.348668	0.376518
115705484	0.99707	0.158507	7.36826		115697367	7.05825	14.7937	15.1921		115720646	1.35196	6.04438	2.24714		115709180	2.63534	0.47619	3.00731		115724496	0.291155	0.811919	0.874242		115711969	1.36442	0.001	0.214965
115723258	173.815	15.4022	23.935		115709531	15.0559	35.6262	14.5122		115717010	11.9159	17.6761	5.65092		115696215	1.25799	0.595041	5.60785		115706817	27.3899	14.3827	82.3989		115722025	22.1077	15.5008	3.47651
115701481	3.17827	0.163002	2.327		115716837	8.30075	21.9335	8.95332		115705994	20.3867	60.4036	22.4718		115707397	63.1324	5.256	33.223		115712213	0.412247	0.928394	1.23799		115695742	2.12377	1.20559	0.335586
115700772	9.75611	1.13575	16.2793		115714560	12.137	27.9901	23.579		115708179	5.70738	11.0757	4.12273		115704343	7.43544	1.86727	11.7978		115701690	1.37838	4.40808	4.14164		115703666	8.75432	0.373508	1.38157
115699402	22.2588	4.62525	3.06867		115700534	23.1626	53.3865	42.872		115698174	11.4954	27.2405	5.45849		115716678	112.016	16.1853	102.3		115708806	0.884845	0.001	2.65606		115704108	10.4699	24.8066	1.65435
115702784	1.90745	0.268288	3.80991		115697797	6.3669	22.251	9.08293		115705459	21.9423	65.6474	24.4677		115699332	2.34409	4.08174	10.452		115716773	9.2952	12.185	27.9148		115700727	4.16564	0.123347	0.658775
115713475	8.73711	4.00227	64.4137		115715705	1.54261	3.5276	3.30825		115703747	10.7225	16.7412	6.26071		115705924	21.9454	0.60677	4.87152		115712920	29.0456	47.6991	87.1843		115704874	15.4364	1.19286	2.44181
115695894	8.23154	0.733168	1.13681		115697928	0.789051	1.64287	0.671423		115717087	3.2215	6.73199	2.52016		115709691	30.6756	19.3683	136.714		115705740	21.6882	24.4109	65.093		115702162	6.54118	4.02212	1.03591
115710152	19.4502	1.43266	2.69344		115716439	3.7667	12.6034	5.14745		115698194	96.2388	134.194	45.7862		115705000	19.7018	33.5679	87.7961		115712025	4.55377	3.59277	13.6603		115722006	3.80384	0.0265097	0.602851
115709006	1.97115	0.706177	0.27387		115706610	13.5284	31.0564	16.2314		115705138	4.24156	11.2907	4.22855		115698803	1.37126	0.965417	6.09991		115716955	1.85067	0.221396	5.54813		115706688	41.075	47.6408	6.50205
115725545	16.3577	6.22309	2.26814		115718758	0.935327	1.92438	2.00225		115717067	5.6541	10.3037	3.86091		115712056	28.4788	7.80853	49.0836		115698502	10.702	9.53656	32.092		115719660	9.45139	0.11821	1.49908
115695768	11.2727	0.0478873	82.4773		115701518	9.29858	28.9145	11.8137		115706752	9.64573	28.9639	10.8705		115720696	0.29523	0.0548477	1.31048		115701355	1.36439	0.734499	4.08837		115711679	60.3073	24.6073	9.56623
115712296	3.39998	0.240239	3.33906		115725033	63.3502	144.687	72.8395		115711241	12.8268	38.0783	14.321		115716168	19.7614	0.163908	4.39596		115718290	2.8631	6.07894	8.577		115699930	8.31979	0.107418	1.32167
115699181	2.96055	0.052012	0.411249		115721003	31.9976	148.371	60.7423		115702857	12.823	38.5991	14.5195		115712631	214.649	23.6569	47.8492		115698222	3.43447	2.8221	10.2886		115710269	0.861162	0.001	0.137641
115700724	14.669	0.349741	2.03512		115709778	29.0038	109.986	45.2436		115721176	1.31977	4.45193	1.67598		115701548	3.64514	0.126698	0.814714		115720769	0.719442	0.792825	2.15091		115722051	2.68911	0.901732	0.429719
115713012	6.97288	1.20791	50.9179		115723628	0.355674	1.08173	0.445741		115712982	24.0041	49.7794	11.4276		115704287	2.48028	0.437982	2.74253		115703054	3.55947	3.70616	10.6388		115706263	85.5418	61.7875	13.6703
115704317	1.43001	0.001	0.199428		115717269	0.885018	3.95586	3.68467		115711459	20.8017	83.105	31.3749		115721929	3.78023	0.158269	16.8056		115720572	1.89054	8.71276	5.6416		115718412	71.9843	8.47647	11.5187
115702801	5.56015	1.19217	0.775597		115699735	22.7996	51.9488	33.465		115721166	5.22967	11.9649	4.51931		115725464	5.79074	0.651741	4.08071		27215464	9.25373	12.6469	27.5975		115725263	628.08	1510.07	100.792
115725363	11.3069	0.0544873	82.5613		115701451	8.67921	17.9492	18.5485		115698718	21.9296	32.1145	12.1359		115715726	0.933136	0.792028	4.1455		115696112	3.50157	7.83129	10.4402		115712349	1.50129	0.001	0.242018
115720645	32.4251	0.350788	4.52495		115701576	1.18902	3.13377	2.53844		115707226	56.8107	92.8686	35.1007		115701340	41.7758	9.53036	59.6845		115701295	0.835071	0.602197	2.48416		115725061	287.282	625.452	46.2428
115698149	8.60714	0.87044	11.9371		115706753	10.2343	26.9048	11.1076		115725305	13.6692	47.9029	6.51592		115716438	2.36125	0.581099	3.62761		115714588	11.8733	5.75714	35.3204		115722745	5.52785	0.371094	0.891914
115714338	20.35	1.82816	2.8451		115718172	10.7077	34.1118	5.22014		115697864	99.1426	305.694	115.793		115701382	52.695	7.63548	47.5562		115706670	12.0286	0.801374	35.78		115706019	8.07924	16.3514	1.30382
115705455	29.0238	0.198054	4.07219		115707628	0.403919	1.8353	0.045989		115713048	115.187	195.403	74.0224		115704795	1.00858	0.253884	1.57545		115706226	1.52975	0.789882	4.54404		115714180	2.04899	21.7979	0.331327
115708103	4.89462	0.037533	0.688959		115722335	10.835	24.6251	19.4147		115722569	17.8777	35.8249	13.6021		115706875	15.4158	2.86223	17.7921		115700337	5.96498	17.5893	17.7102		115717182	8.98545	32.6923	1.4509
115721363	3.23285	0.289689	3.92912		115714397	17.7765	40.3983	33.7283		115724199	1.57342	1.7429	0.662616		115706240	2.26837	0.578785	10.0585		115704810	25.5231	30.7699	75.7338		115715233	2.2707	0.001	0.367777
115722916	12.1817	0.660853	8.94697		115723040	31.0796	91.856	38.2146		115708615	1.31453	2.89677	1.10364		115706831	3.34381	6.70722	14.8234		115725315	10.0718	22.0436	29.8833		115705814	0.808153	1.57268	0.158631
115725167	1.44694	0.240714	0.204905		115714497	47.0794	98.7366	41.0781		115709276	43.0135	108.923	20.5342		115710258	7.91934	1.76124	10.9033		115716206	13.8494	14.8352	41.0843		115699646	12.2344	0.120698	1.97947
115705703	66.2162	4.48672	9.35344		115719175	9.16014	20.7755	11.2757		115705125	31.3046	103.009	39.353		115714468	24.5646	6.65224	41.1328		115712171	0.502615	0.869438	1.48888		115698612	7.07488	26.7088	1.14627
115703612	3.4819	0.134141	1.79409		115722384	29.0407	84.5779	35.2352		115701208	3.41342	8.64483	3.30779		115703902	38.2283	51.514	169.054		115704542	4.88365	2.0364	14.4767		115719608	61.3129	11.1537	9.95119
115720687	2.01097	0.371815	0.63628		115713839	2.0497	6.13101	2.5565		115725420	2.77031	7.364	2.81915		115698807	84.6212	11.7036	72.2388		115720563	0.001	0.75462	3.8675		115725260	16.3678	0.001	2.66408
115721811	0.440996	0.0971623	0.916781		115697399	14.6905	33.367	13.915		115725600	40.736	51.51	19.4799		115711580	1.12814	0.0837507	4.98551		115694922	2.99489	6.16081	8.87585		115717301	2.93471	0.331767	0.478978
115702787	7.31674	0.757802	10.1888		115725367	14.6931	33.248	17.2144		115705582	14.3391	65.0141	24.9202		115696407	0.52125	0.269088	2.30123		115703215	49.5981	108.247	147.012		115705861	22.0009	6.17688	3.5899
115719184	3.59509	0.001	26.1543		115705271	33.0956	74.8109	54.1255		115720835	1.9249	9.67607	3.7129		115720632	2.50966	0.353791	11.0479		115699380	8.48527	20.2984	25.1321		115718750	2.16047	5.70592	0.353544
115723312	4.33735	0.001	0.6153		115723211	11.2599	25.45	20.9193		115722804	3.67544	8.63205	3.32093		115706403	34.1646	6.63337	40.851		115721949	12.4207	20.551	36.7771		115724605	1.65056	0.383018	0.270473
115707061	3.46682	0.135864	1.8156		115695617	12.8881	29.0169	16.3652		115715099	8.17352	15.6695	6.0293		115715730	2.20582	0.663794	4.08186		115721082	2.77319	4.35022	8.20444		115722357	152.031	466.346	24.8383
115707982	41.631	2.84419	5.90973		115715932	10.6487	21.926	9.20459		115704626	148.744	194.798	74.9915		115724575	0.217655	0.195973	0.953975		115696903	0.865827	1.49473	2.55856		115702336	63.5331	2.63445	10.382
115710084	5.94113	0.970533	0.844597		115716787	8.04489	18.1076	11.7706		115725294	24.3006	27.2558	11.635		115696227	0.513956	0.178626	1.33654		115712993	17.3119	2.24985	51.157		115711842	271.67	354.458	44.4332
115725045	7.2251	0.6091	8.18028		115711244	14.4787	29.5242	30.8224		115713909	40.4819	102.859	39.7924		115707309	4.64367	1.02503	6.27941		115716092	3.493	7.20883	10.3135		115702783	11.2997	2.62914	1.84906
115717378	20.2471	10.0318	2.88202		115706837	12.9785	29.194	25.7681		115708024	4.96763	36.5354	10.8878		115698252	4.49943	1.07358	19.7757		115724527	3.42046	6.25636	10.0965		115711173	0.990039	0.12802	0.162852
115714882	29.8399	3.64015	4.25511		115703223	11.5856	26.0414	18.7826		115721985	2.19341	10.3732	4.022		115705533	5.41039	0.044399	1.22223		115718770	2.03743	2.89604	6.0088		115698272	18.9324	1.64031	3.10154
115704295	38.5944	5.54247	74.5189		115708156	2.19062	4.92279	2.66037		115708134	6.95328	9.34088	3.62429		115706590	15.2712	3.44315	21.0821		115705536	29.5002	59.7338	87.0275		115721232	3.03679	0.0393337	0.498866
115699046	9.54746	0.090875	1.36831		115697112	6.18129	22.4788	9.44796		115695886	22.8479	48.3588	18.7691		115701279	8.37112	1.41212	8.63259		115694781	1.99335	0.805402	5.87759		115717453	29.4489	60.3285	4.83951
115714064	31.4271	3.6296	4.50692		115718648	8.96728	22.2718	9.37278		115698597	17.0002	58.5285	22.7755		115697997	6.9522	7.15823	30.428		115714144	7.87983	10.586	23.2384		115701364	16.3577	1.38448	2.68894
115697128	1.6004	0.001	0.230336		115718466	55.9051	125.444	91.3013		115707725	3.13413	15.7282	6.12402		115708858	9.74339	0.70175	2.20584		115700806	5.38287	9.55025	15.8644		115697266	10.4076	1.48391	1.71302
115721725	0.597391	0.001	4.27827		115699616	6.51924	14.58	8.46626		115697773	41.6499	38.7074	15.078		115707048	10.6623	15.2267	46.6356		115714093	5.5633	37.608	16.3951		115700920	97.6884	87.8295	16.0738
115699125	18.7304	0.399699	2.69114		115695724	20.6722	54.5163	23.0265		115699138	13.9962	23.8129	6.73738		115719611	15.6442	4.90593	29.7036		115725247	23.9005	54.4951	70.4064		115712201	11.3018	0.08657	1.86203
115710330	3.11945	0.777271	22.3392		115707297	8.5936	18.1137	18.2435		115706627	14.556	37.2067	14.5018		115698126	58.5078	9.23454	55.8954		115703012	7.30689	0.905761	21.4973		115722399	7.25696	0.87301	1.2
115702639	7.88561	1.02757	13.6006		115699467	12.3037	27.478	34.6114		115703578	86.3682	89.5312	41.5779		115716842	1.00278	1.24163	4.38198		115708477	2.03205	2.95993	5.9769		115697485	30.224	0.001	5.00063
115708652	1.62277	0.17913	2.35548		115715092	2.91385	6.50391	4.45464		115718703	1.7969	8.8274	3.44803		115698227	11.9761	8.66351	52.3231		115724857	6.12482	5.32842	18.0078		115720669	42.3738	17.3327	7.01662
115701381	42.744	4.22638	55.631		115710932	34.2289	79.9705	16.7414		115703827	4.93961	8.10372	3.16579		115707715	13.0122	2.54698	15.2479		115718998	15.5	18.4599	45.5704		115718919	95.6558	77.0292	15.8501
115708661	2.65724	0.373386	4.86616		115725308	25.2905	53.3785	22.5839		115717102	0.257129	1.0956	0.429139		115698602	43.72	1.91717	9.90466		115700731	5.0937	4.83526	14.9722		115723009	6.1779	7.94398	1.02565
115716326	36.3836	0.001	5.25999		115707417	1.75833	3.97828	1.68462		115707753	41.0153	84.1618	32.9256		115703588	1.02534	0.251477	1.5003		115709610	32.912	81.918	96.6992		115725109	20.1286	153.217	3.34471
115696960	0.289665	0.051819	2.05935		115701002	3.51761	7.84269	4.17913		115697881	6.58708	37.5797	14.3537		115717136	12.9253	18.9874	56.2697		115700278	4.85893	1.29248	14.2718		115703972	1.84353	0.304146	0.307414
115705843	20.9386	3.41738	3.0306		115724507	1.91619	4.50982	1.91356		115712227	0.0818153	1.11814	0.43828		115719457	19.0791	5.80789	34.6479		115716692	16.1446	45.8408	47.405		115711163	5.56034	0.235372	0.925647
115697979	1.47783	0.28583	0.855385		115707375	30.3948	67.6789	34.9567		115709965	6726.55	69.6214	27.2657		115705805	1.81177	0.0851103	0.411228		115708428	3.24029	10.0705	9.51061		115701578	24.7779	43.1163	4.13105
115702746	2.75723	0.745779	0.400475		115700691	38.8585	91.4552	38.9005		115718950	6.69768	18.955	7.43727		115712337	9.38072	0.850103	5.06298		115725021	79.2325	119.751	232.588		115704624	25.8375	3.03084	4.31678
115709721	7.20647	0.418263	5.43074		115720784	4.25118	18.5363	7.89888		115718955	55.7676	213.505	83.8095		115722958	2.86039	0.001	0.718026		115709031	0.278337	1.83915	0.814527		115717280	2.53823	0.361515	0.424857
115702728	8.36824	0.971269	12.5864		115725728	18.8198	41.8865	24.1556		115709811	1.66966	14.5035	3.63373		115697492	7.76629	4.94869	33.687		115698499	8.74353	1.95557	25.6404		115718449	6.31666	0.0308097	1.05829
115712114	6.61801	0.0987443	0.961413		115717089	10.6222	33.4784	14.336		115700458	76.6307	224.908	88.2937		115716074	22.851	6.64501	39.4705		115716412	2.69507	9.15643	7.89687		115700940	9.20208	1.44526	1.54187
115698313	5.83822	2.31812	0.848825		115709709	27.9886	62.1189	41.791		115699614	2.0287	30.4193	4.41303		115711324	12.008	0.001	2.73959		115722631	29.3725	27.6188	86.0612		115713934	19.7089	2.76558	3.3021
115704535	0.218411	0.0492337	1.54068		115717065	9.15695	34.6523	14.8433		115698109	34.215	57.3077	22.5067		115702654	18.3509	2.7955	16.5751		115705903	6.38345	15.2526	18.6852		115699594	4.42043	0.222321	0.741649
115715005	8.50757	0.287757	1.23977		115708175	15.1676	33.8264	14.493		115699133	25.3233	50.9544	20.0438		115705905	9.99482	3.15622	18.7106		27215501	51.3864	98.2261	150.398		115712973	31.2171	6.53566	5.24223
115701162	31.6379	2.24438	223.629		115698772	4.02138	8.89879	7.06466		115697745	132.981	206.081	81.0976		115705739	23.7643	2.16304	12.8086		115705974	0.613466	0.631957	1.79351		115708831	5.76747	5.2525	0.969373
115718518	5.32418	0.478841	0.776929		115713070	18.3326	61.7965	26.5398		115716981	22.6543	34.9805	10.9343		115719506	36.1552	6.88436	40.7768		115699086	49.3901	59.4436	144.427		115695715	2.08867	0.149702	0.351689
115695754	4.3203	0.709767	0.630988		115723543	3.46803	7.66762	6.92662		115711595	4.90089	6.5317	2.57314		115721769	3.99365	1.44361	8.52582		115723275	0.555451	0.317919	1.6215		115725262	1.55901	0.36206	0.001
115722230	22.4792	1.62816	21.0018		115706642	29.4779	63.315	27.2373		115712707	54.6177	84.0029	33.0907		115708188	52.7574	11.4892	67.6543		115701174	3.8092	4.35632	11.1307		115701521	4.97174	1.08349	0.836004
115724186	4.91895	0.03165	0.720473		115702996	0.775611	1.71204	1.6939		115699418	14.5179	147.548	31.5259		115710748	4.42222	0.533469	3.13329		115714982	56.759	40.7961	165.862		115698791	28.8088	2.3304	4.84381
115702625	12.9253	2.59725	1.89312		115725003	55.4845	167.531	117.092		115722291	10.7545	15.1529	5.99717		115709694	4.28436	0.310067	1.81507		115718574	0.591488	0.28912	1.7259		115716547	15.2612	1.72823	2.5674
115718668	1.7485	0.001	0.257286		115713061	17.7862	39.2394	21.0628		115715805	1.40495	2.83183	1.12329		115708895	0.396152	0.001	1.7131		115704738	0.652028	0.267177	1.90085		115717230	5.12366	1.19078	0.863626
115710120	7.9825	0.736563	9.40567		115706237	32.5918	71.8597	45.2931		115709090	33.0757	43.6042	17.2898		115719489	6.2918	11.1934	27.1621		115698540	10.5006	14.3127	30.6294		115719026	2.28144	0.0297627	0.385881
115708715	1.45399	0.332075	0.675363		115714644	5.60063	18.5675	7.98909		115712013	4.6878	5.92284	2.35002		115718592	0.723122	0.0280267	3.1119		115719453	22.7208	56.9685	66.2562		115704735	2.40676	0.0847073	0.407184
115704768	41.9732	15.2888	294.128		115698873	10.657	36.0892	15.5545		115722443	5.53454	18.5374	7.38456		115714742	6.15741	9.37155	26.441		115716046	18.3212	4.97405	53.2812		115710077	82.2974	12.8185	13.9079
115698132	37.2449	1.19946	5.46357		115706239	184.024	405.497	312.147		115716862	16.3756	21.9072	8.73033		115697676	5.33264	4.79519	22.8323		115712129	28.3411	45.5631	82.3845		115721023	10.2136	2.29194	1.72914
115720761	15.5556	1.56717	19.9789		115721297	6.1572	12.3385	5.33446		115705878	17.5953	38.5594	8.51306		115704082	9.66323	0.198413	2.22307		115695842	2.50301	10.4604	7.26788		115709956	27.5312	4.13111	4.66937
115718429	3.03298	0.237724	2.99595		115719712	42.0391	95.8458	41.5965		115721750	0.362014	1.70012	0.679459		115698161	3.94048	2.08806	16.8212		115718693	35.3778	11.7015	102.743		115705277	12.5223	2.05254	2.12669
115707243	31.4133	10.7316	4.62375		115705735	1.13545	2.49653	1.78777		115710290	0.63192	2.21967	0.30653		115709356	4.9059	1.27441	7.42398		115722749	13.7617	14.7702	39.9512		115694841	7.59313	1.55426	1.29067
115714658	20.7188	2.66391	3.05172		115721277	21.0723	54.3061	23.6275		115710316	2.04646	4.13813	1.65544		115703145	13.6391	2.89185	16.8426		115709949	16.0333	12.3607	46.5151		115716468	2.36709	23.0817	0.40389
115705501	0.994671	0.140628	6.89043		115700246	30.3575	68.5891	63.9991		115717146	5.95371	27.5929	11.0376		115715721	6.56316	7.78473	27.9833		115708765	14.2767	25.2005	41.4175		115709903	11.6323	0.210864	1.98303
115699555	5.48924	0.542376	0.810444		115702892	10.8917	39.227	17.0968		115712642	40.6619	210.471	19.6976		115707260	1.74418	0.0929173	0.403169		115719359	2.11557	4.22013	6.13196		115696814	9.10272	1.63804	1.55579
115721320	2.71402	0.535736	1.48834		115706381	39.2953	86.2154	60.0256		115711512	5.9164	10.7948	4.32361		115713417	5.324	0.850566	4.93861		115722199	2.85641	5.47429	8.2772		115722340	61.275	4.20588	10.4681
115705273	1.96253	0.218411	0.290947		115704753	2.52417	5.97615	5.30925		115712101	1.82671	4.04533	1.62071		115697894	2.62329	0.420964	11.1692		115723068	0.619885	3.1124	1.79449		115701467	507.583	66.7813	86.8939
115699504	1.66564	0.001	0.247133		115713053	15.175	33.2924	28.6514		115711438	19.151	43.4308	17.4081		115720644	2.23315	0.409552	9.50194		115701505	0.537376	0.859671	1.55494		115712061	62.3583	80.8256	10.6853
115700426	28.2731	2.08648	25.8103		115725566	0.996875	2.18343	1.76812		115702730	4.50176	10.5577	4.24		115710758	9.75195	7.82422	41.4976		115715201	2.66695	4.96042	7.72056		115725510	8.16718	0.782584	1.40022
115710015	7.92946	0.425687	1.17353		115705645	10.6185	23.2683	15.5272		115712125	7.92771	20.6668	8.30262		115716676	3.85954	0.247837	0.893976		115698870	1.30786	0.001	3.78514		115722233	5.88267	0.001	1.00881
115704951	4.00237	0.839568	0.592894		115709820	3.31255	7.2578	6.38524		115703582	15.68	291.16	33.9485		115724566	3.40601	1.23392	7.15845		115710268	14.1643	32.5411	40.9882		115706892	47.1934	72.6117	8.08995
115706232	9.4161	0.870329	10.6737		115698206	6.73256	25.2621	11.0648		115714511	4.11511	11.4246	4.59645		115707763	119.365	233.177	507.445		115712071	0.663573	0.001	1.91668		115706425	6.90028	0.518756	1.18357
115701166	55.7991	3.41783	8.25796		115708346	2.56254	5.60139	4.55906		115716653	3.24587	11.7725	4.75017		115708754	5.5005	1.22917	7.10883		27215456	1029.67	1275.01	2975.48		115703372	246.465	182.585	42.2561
115698592	1.6005	0.186587	2.26524		115699597	51.6345	160.006	25.4655		115706227	8.805	22.1003	8.9282		115718746	13.4255	0.382344	3.11669		115711602	5.88982	17.9455	17.0164		115718504	53.5951	87.1992	9.18963
115700720	16.8242	0.504572	2.49104		115712433	0.147356	0.846984	0.605004		115694730	8.2399	38.0789	15.3966		115721073	43.8972	0.543138	10.2021		115694764	2.11353	5.06191	6.0987		115712027	1.26669	0.458988	0.218139
115711171	10.4529	0.510041	1.55047		115710913	4.18222	9.70347	4.27916		115706645	30.7739	72.2242	29.2363		115710927	4.51616	1.58438	19.1884		115714514	15.0221	13.2074	43.3447		115718918	63.5159	49.4786	10.9105
115708332	21.4264	1.04746	3.17911		115705704	100.711	363.832	160.564		115712853	4.40649	14.6783	5.94643		115715269	13.2364	1.45624	8.40955		115724105	4.76207	1.04755	13.7362		115707843	1020.13	2247.54	175.253
115707516	5.43924	0.162653	0.810843		115724117	2.51683	8.76128	5.2768		115699554	42.4939	123.769	20.6368		115704694	3.35412	1.0671	14.2459		115706280	3.98515	3.2871	11.4931		115718740	13.277	149.159	2.28353
115709235	5.42376	0.0833497	0.810939		115712872	17.4041	36.4431	36.4878		115699417	15.0607	53.8503	21.8185		115719550	2.0071	3.87069	8.51522		115722754	1.03006	1.53536	2.96509		115717101	17.7575	41.5164	3.05589
115711187	36.6785	1.51384	18.4573		115699335	28.9112	64.0936	28.635		115697869	7.32942	18.9753	7.68958		115721195	0.685155	0.0335137	2.90388		115716321	1.58951	2.45349	4.57601		115709258	1.33837	0.353288	0.191954
115708172	10.412	0.693256	1.55632		115708152	3.4776	7.54117	6.93442		115725406	4.85904	10.8093	4.38414		115695796	12.8501	0.001	3.00985		115700637	3.26428	0.480204	9.39635		115714030	37.3299	10.9825	6.42467
115715595	26.5353	1.98701	24.0187		115716878	2.75019	5.9584	5.15741		115721873	5.29717	12.6957	5.15336		115718631	9.73658	9.38652	41.239		115722008	3.28527	0.878969	9.4566		115706284	32.6415	139.458	5.62065
115695982	2.73553	0.549727	1.76666		115707252	38.1182	77.9821	34.907		115710209	3.20883	5.37924	2.18982		115705895	1.11229	0.462178	4.70763		115705626	19.5149	41.9128	56.1729		115715243	6.31346	0.218146	1.08806
115707496	116.745	5.79502	17.4419		115706527	24.2659	52.4916	30.1179		115714908	12.5651	16.0477	6.1157		115701104	19.5915	4.34456	24.9648		115716733	6.52603	90.1043	18.7789		115696524	6.48417	3.52232	1.11882
115697518	9.86239	0.506262	6.1017		115722312	31.6019	68.3359	39.4045		115715723	3.32361	4.13749	1.68578		115705864	16.4892	15.8804	69.7683		115699690	11.2035	26.3526	32.2331		115706572	11.77	0.803072	2.03046
115702448	4.09548	0.001	0.613525		115722937	6.38213	13.7997	10.0137		115709531	15.0559	35.6262	14.5122		115709201	30.2725	1.91684	7.10804		115704811	2.31819	0.518883	6.66455		115711340	11.7947	20.516	2.03644
115711588	51.8598	17.1802	7.76001		115697543	14.91	34.3465	15.3979		115716837	8.30075	21.9335	8.95332		115721022	2.91187	2.65547	12.315		115717412	4.26768	0.393238	12.269		115712964	7.11926	0.975761	1.23203
115705642	50.4837	4.48488	7.58553		115707114	17.5875	48.3716	21.7274		115697797	6.3669	22.251	9.08293		115707098	1.18545	0.194807	5.01115		115713064	95.152	69.9245	273.562		115715784	2.69379	1.48179	0.466702
115719323	5.44747	1.08406	0.819722		115716393	43.4103	93.7897	49.2036		115697928	0.789051	1.64287	0.671423		115725339	8.34483	7.87589	35.2839		115709845	0.704684	0.632537	2.02394		115723370	86.8875	74.9823	15.0822
115696250	9.52266	0.212955	1.43755		115703842	3.29074	9.36487	4.21297		115723759	2.93957	5.02368	2.05197		115712503	54.3909	11.5954	66.0862		115709242	3.19046	4.58225	9.17001		115711146	4.4259	4.6323	0.771004
115707181	14.8388	3.37402	99.9109		115714156	59.7848	223.866	100.745		115716439	3.7667	12.6034	5.14745		115707121	20.0323	3.44199	19.5943		115719654	21.8132	9.10053	62.6674		115725090	195.309	10.4864	34.0192
115708280	22.8604	1.23058	3.45276		115709877	0.472583	3.09704	2.47999		115701518	9.29858	28.9145	11.8137		115715972	12.0599	0.524824	2.84307		115719538	4.09631	4.61695	11.7611		115722324	78.2737	35.861	13.6551
115721307	9.0914	1.13921	13.5179		115707169	2.10081	4.52143	2.92178		115721003	31.9976	148.371	60.7423		115703148	15.2566	0.452073	3.59704		115712598	2.33498	5.45693	6.69972		115703068	119.768	86.0581	20.9032
115703651	6.09797	0.0294913	0.923062		115707691	2.35391	7.77481	3.50915		115717179	18.5385	35.8657	14.7193		115699756	9.35533	0.859451	2.20612		115701533	25.724	25.8407	73.7832		115702651	47.6403	118.417	8.31776
115715106	1.2204	0.286768	0.001		115695664	61.5375	186.604	84.3433		115709778	29.0038	109.986	45.2436		115700383	32.9374	2.68709	7.76705		115709511	1.46534	1.14909	4.19854		115712832	9.65249	0.605597	1.68665
115714877	13.3796	1.54297	2.0275		115713042	34.4537	74.1085	41.4422		115723628	0.355674	1.08173	0.445741		115699168	139.551	10.7767	32.9231		115698145	12.4425	15.4792	35.6587		115714909	27.8583	1.95194	4.87093
115719770	70.1929	6.11723	10.6393		115699321	40.8291	108.018	48.9651		115703038	22.9284	32.1423	13.2374		115724489	2.86854	0.0353053	0.678484		115721828	3.76861	8.38233	10.7985		115715755	3.61141	0.305707	0.632639
115723607	8.56347	0.242148	1.30361		115697123	13.1761	28.2904	24.2863		115707201	27.0708	50.2863	20.7105		115708296	4.52146	0.643683	3.64558		115719849	3.47485	1.03087	9.95164		115697307	120.681	154.587	21.1163
115724901	204.656	59.2665	31.2092		115700899	4.2521	9.81036	8.88731		115706753	10.2343	26.9048	11.1076		115699198	1.90481	0.02245	0.451203		115699632	9.21857	34.045	26.3979		115706418	9.91207	0.51393	1.73921
115700658	20.873	3.26807	3.18441		115703805	13.2838	28.5136	23.2642		115722879	29.5022	38.69	16.0035		115701027	6.42016	2.8051	27.0076		115717309	14.775	71.2749	42.262		115697962	15.9643	1.62138	2.80226
115704918	1.90299	0.135601	1.58814		115712793	44.7851	120.196	93.5522		115718172	10.7077	34.1118	5.22014		115697240	31.4261	44.417	132.188		115724934	0.377037	0.001	1.07644		115719031	394.698	167.034	69.3172
115708941	5.18041	0.001	0.791051		115708047	56.3046	199.012	27.8454		115707790	4.46723	8.87727	3.67417		115715155	25.388	8.11198	45.7355		115724672	0.606567	0.181471	1.73216		115700592	5.18829	0.727341	0.912175
115698964	4.07525	0.281315	27.2679		115716511	10.0383	23.1695	20.9553		115707628	0.403919	1.8353	0.045989		115715886	1.13429	0.001	4.75746		115706257	10.7084	4.85445	30.5992		115707950	53.418	2.21618	9.39346
115704533	3.38018	0.645761	0.516965		115719252	7.92753	20.6162	9.37527		115704842	53.1723	53.0388	25.9579		115724668	0.365852	0.133903	0.892091		115715124	4.21097	11.1453	12.0199		115722196	363.844	1005.64	64.0693
115708178	1.8994	0.341737	4.00446		115723926	0.858537	1.83966	1.9737		115723040	31.0796	91.856	38.2146		115716173	3.6944	0.629558	3.54192		115704272	0.512496	1.22909	1.461		115719029	42.4883	4.46229	7.48321
115709690	0.912275	0.0753517	0.873357		115699622	8.11487	17.6033	8.00532		115714497	47.0794	98.7366	41.0781		115701293	7.83414	1.50982	8.49946		115699196	7.05196	9.30971	20.1216		115721939	5.88098	0.207609	1.03697
115700700	1.16455	0.090315	7.73321		115712896	60.311	142.193	125.844		115719140	54.5213	106.811	44.4944		115716921	7.05883	1.10774	6.22842		115697129	32.277	55.1375	92.0566		115724103	42.4092	0.494072	7.48253
115709404	26.4493	1.54753	17.8693		115725089	14.2477	36.8394	16.7546		115722384	29.0407	84.5779	35.2352		115708721	3.20168	1.12684	6.33103		115702724	5.40283	3.0157	15.4047		115700453	345.062	685.099	60.9269
115703684	6.49171	0.469379	5.4005		115706084	1.2917	6.68239	2.6868		115705760	3.68035	5.94514	2.47749		115720968	2.61116	4.03993	10.9196		115698962	9.22178	16.1386	26.284		115722629	63.9156	54.6841	11.3028
115699482	48.8755	1.50217	7.48417		115718881	13.5427	32.0082	14.6291		115713839	2.0497	6.13101	2.5565		115701109	1.01419	0.252403	1.40755		115709448	0.435008	0.001	1.23799		115719238	200.912	14.8275	35.528
115701378	29.5461	0.563444	4.5259		115710405	1.32086	5.00847	2.29204		115697399	14.6905	33.367	13.915		115721282	0.955441	1.84559	3.98313		115704684	0.830297	1.81032	2.36451		115725159	120.252	13.0886	21.2732
115720598	7.77465	1.90264	51.6235		115716797	123.035	247.731	60.8783		115723252	53.6324	65.4637	27.3289		115705115	6.10681	5.71341	25.4593		115722142	11.3286	14.8971	32.2316		115702031	4.11126	0.67939	0.728302
115705798	1.02045	0.212367	0.913681		115725389	10.8941	35.6829	16.337		115725567	44.4625	70.1905	21.7242		115711641	1.80275	1.62703	7.50418		115704647	0.746958	1.63684	2.12219		115707282	567.524	1137.67	100.442
115722722	69.1664	10.6858	10.6123		115697546	0.745761	3.17476	1.45476		115715932	10.6487	21.926	9.20459		115703006	13.3825	2.77773	15.4482		115723475	0.735032	1.40369	2.08823		115714811	3.48179	0.701174	0.618198
115713463	1.54771	0.368685	0.593526		115712235	3.60598	13.4898	6.19329		115702886	0.406275	1.92212	0.0163613		115707213	10.6522	2.68461	14.9126		115698470	30.277	42.5083	86.0181		115709961	27.4026	4.04725	4.86153
115702776	5.92253	0.0329523	0.909819		115712820	22.4906	47.846	31.9329		115697112	6.18129	22.4788	9.44796		115718756	1.9402	0.0464283	0.466713		115706164	0.21812	1.28908	0.617547		115701450	275.289	726.471	48.8588
115698223	13.6248	0.240471	2.09664		115699342	11.1242	23.6559	19.4007		115718648	8.96728	22.2718	9.37278		115712608	0.660824	0.12338	2.7472		115724885	104.291	121.22	296.046		115715227	12.9588	0.001	2.30078
115715250	10.865	0.307929	1.67414		115695922	7.59811	16.1497	11.9358		115709833	12.1527	22.9605	9.68099		115705382	8.09479	0.923368	5.11608		115705077	25.4802	85.3879	72.3159		115711764	21.1176	23.7353	3.74882
115707999	13.6842	1.01235	2.11531		115714934	21.2356	92.7719	10.5111		115695724	20.6722	54.5163	23.0265		115707081	3.33533	0.798402	13.8294		115708799	0.338394	0.439521	0.958132		115716635	26.2441	8.9235	4.66304
115706952	9.77375	1.12597	12.7765		115701534	2.76027	5.85403	4.75766		115717040	27.6418	39.6632	16.7716		115709646	35.9433	5.89852	32.665		115715680	8.62746	75.8546	24.4561		115724177	2.84677	0.154785	0.506602
115706215	9.04046	0.418883	4.71754		115720676	55.617	195.708	90.204		115720690	10.5292	15.2294	5.1498		115712799	33.3451	7.86425	43.4794		115706579	4.21106	1.13447	11.9262		115699421	25.7035	6.52748	4.56883
115696716	0.148519	0.001	0.956621		115716615	5.19628	10.8634	5.01103		115710932	34.2289	79.9705	16.7414		115715069	7.55025	0.951016	5.24513		115719854	0.367203	0.555781	1.03767		115705769	2.28279	0.144307	0.406574
115707511	5.88596	0.833397	0.911093		115707886	125.081	252.073	116.297		115725308	25.2905	53.3785	22.5839		115722473	2.29675	1.33413	9.51265		115695941	1.17766	0.452874	3.33152		115712264	0.993233	0.001	0.177448
115722295	46.0766	6.06538	68.2231		115698693	5.18534	10.9573	7.92523		115707417	1.75833	3.97828	1.68462		115721321	4.67529	0.465643	2.55862		115709480	13.5772	13.3572	38.4128		115708056	25.3215	6.16853	4.50624
115698241	37.5957	4.02276	45.2227		115712868	16.6846	34.134	15.7693		115724507	1.91619	4.50982	1.91356		115716226	11.9359	0.729047	2.87974		115709388	46.5155	116.532	131.582		115724543	2.11592	0.851533	0.378827
115697719	55.8699	5.02188	56.4336		115706276	22.1483	46.7582	28.7106		115708043	11.5203	19.2525	8.18244		115714739	43.5874	4.5854	25.1481		115711607	1.70123	3.36036	4.80818		115712385	20.5534	0.0298293	3.6743
115719385	0.265242	0.0390083	1.70803		115725528	14.5872	40.9625	18.9402		115700691	38.8585	91.4552	38.9005		115709066	0.955965	0.037923	0.231621		115716757	1.04916	12.9147	2.96448		115711984	17.2059	0.940209	3.08244
115714491	278.408	34.2932	43.0841		115701024	17.4106	36.7267	24.1492		115720784	4.25118	18.5363	7.89888		115718944	2.4096	0.292437	1.59962		115703221	0.214553	0.206038	1.10465		115706149	107.502	88.2927	19.2764
115705117	4.90645	0.281708	0.760391		115703930	9.46439	22.0294	10.1957		115717089	10.6222	33.4784	14.336		115717296	35.9413	7.31544	40.0704		115714183	4.36394	200.299	12.3291		115725592	142.82	14.3113	25.6332
115697978	4.22667	0.510978	5.71415		115709865	11.8632	24.9487	16.1341		115717065	9.15695	34.6523	14.8433		115718681	1.44929	0.001	5.99738		115722303	2.2925	0.904128	6.47478		115703203	0.500364	0.625585	0.0906463
115712694	3.50482	0.590804	6.60335		115703427	8.08891	16.9785	9.78787		115708175	15.1676	33.8264	14.493		115700669	0.521779	0.444917	2.15707		115714040	18.2386	32.4654	51.5158		115714949	31.8804	7.91906	5.72761
115717451	37.7832	1.98869	5.86484		115700276	0.150739	1.2938	0.643096		115723420	25.3369	48.8175	20.9394		115702552	0.572712	0.001	2.36746		115720974	2.61366	6.39039	7.37847		115716415	4.60071	1.982	0.829101
115697154	22.6211	3.39101	146.003		115705292	1.98639	4.15646	3.92986		115720588	20.077	23.5584	10.1057		115707291	1.99935	0.568295	8.26794		115700764	10.9016	19.3154	30.7807		115715735	1.01405	1.16021	0.183673
115700725	7.62535	2.12411	49.1549		115695879	7.55918	40.5304	3.75131		115700829	18.819	32.1689	13.8133		115713917	7.23501	2.38931	13.016		115718472	23.3248	50.017	65.8592		115723670	46.435	10.2509	8.37447
115707911	0.839318	0.001	5.39717		115708511	8.8259	23.6692	11.0221		115713070	18.3326	61.7965	26.5398		115722641	5.82691	1.5437	8.39965		115694796	1.86582	0.0458673	5.26594		115722232	23.558	26.1935	4.25063
115720617	3.00854	0.722447	1.17403		115702998	3.14075	6.56137	5.57795		115706642	29.4779	63.315	27.2373		115697973	62.1864	12.0525	65.5992		115701407	4.47526	7.131	12.6317		115706358	12.2661	9.46669	2.21415
115708101	0.933146	0.224717	0.985823		115722971	2.6856	15.3075	5.55094		115704812	4.51188	5.78973	2.49135		115709308	0.233006	0.241659	0.958173		115717287	8.61483	1.51804	24.3042		115705761	180.509	15.5594	32.5743
115705685	1.30956	0.315248	2.45772		115699715	14.8387	44.1385	20.585		115714644	5.60063	18.5675	7.98909		115699605	6.57019	3.7716	27.0703		115723286	2.25869	9.54871	6.37066		115721012	1.96839	2.27857	0.356364
115712575	446.53	49.2111	69.5473		115711447	2.60845	5.43245	6.6469		115699195	56.4609	82.0985	35.3385		115719391	0.467967	0.266361	1.92424		115705835	2.52073	1.83525	7.10829		115722407	18.2812	38.3311	3.30354
115702731	43.1559	2.01775	22.4307		115696238	6.77307	17.5419	8.19646		115698873	10.657	36.0892	15.5545		115703172	2.46782	0.793016	4.27399		115701413	18.3017	16.6237	51.5354		115724689	9.96302	17.4442	1.80417
115712355	4.9475	0.331959	0.772995		115708335	17.6967	53.0916	24.8213		115721041	77.0869	90.9429	39.2009		115697236	20.1159	5.33811	28.7541		115705193	8.62558	12.4288	24.2832		115697903	18.0581	38.7124	3.27165
115699259	38.517	2.05691	22.8304		115723126	14.195	35.9332	29.2567		115721297	6.1572	12.3385	5.33446		115704556	25.775	4.37002	23.5123		115717344	15.9056	8.93794	44.7763		115710707	1.21102	0.306099	0.0921357
115703004	6.38627	1.35846	3.63879		115706777	4.71321	9.79932	7.85098		115719712	42.0391	95.8458	41.5965		115716406	39.9105	4.97267	26.732		115699071	14.3084	24.3423	40.2601		115714863	57.3305	36.0056	10.3854
115703819	12.8227	2.82186	2.00363		115717228	10.7343	22.9052	10.7234		115712677	66.9741	110.024	32.9577		115709843	1.80206	0.482185	2.58108		115712761	16.9066	15.587	47.5568		115700713	5.99225	1.19981	1.0875
115704097	13.9551	0.731219	2.18922		115714707	26.8094	55.6954	52.0872		115721277	21.0723	54.3061	23.6275		115725051	4.20739	0.973729	5.21621		115708120	6.60002	12.321	18.5534		115707841	64.9711	62.8387	11.7955
115699637	0.888066	0.215334	0.969972		115725788	0.0599433	0.592318	1.87204		115717346	6.60047	8.73849	3.80333		115705819	0.430207	0.535139	1.76314		115698918	0.001	0.001	0.892901		115695666	2.6636	1.37329	0.48451
115719443	2.39437	0.348668	0.376518		115699519	9.79572	21.5866	10.1145		115702892	10.8917	39.227	17.0968		115720642	60.4929	16.3303	87.1749		115720756	0.001	0.001	0.898631		115696768	1.63949	0.361573	0.298929
115698912	10.197	0.788384	8.71483		115706813	2.8761	6.40072	5.91499		115699322	23.6328	41.4669	18.12		115713617	2.53182	0.433533	2.30798		115719415	0.001	0.001	1.00078		115700540	23.9225	5.69679	4.35433
115711969	1.36442	0.001	0.214965		115697464	43.1356	89.3234	51.2978		115720904	34.2337	40.5945	17.7413		115714274	30.0742	5.84291	31.1006		115724869	0.001	0.001	1.02542		115715323	6.40314	0.283007	1.16857
115703666	8.75432	0.373508	1.38157		115706285	4.98669	18.1302	8.53178		115715611	29.4113	45.9165	20.1039		115706044	18.6822	7.66509	76.6501		115720647	0.001	0.001	1.14779		115718205	32.3139	2.77851	5.90073
115705817	12.3084	1.78333	19.7181		115702879	10.8096	36.0975	16.9924		115714832	40.3974	58.3673	25.5599		115694805	0.477711	0.422565	1.95477		115703311	0.001	0.001	1.18296		115706097	3.329	0.915484	0.609175
115700727	4.16564	0.123347	0.658775		115698275	10.5801	22.3288	10.5352		115698206	6.73256	25.2621	11.0648		115698760	5.49092	1.18878	6.31854		115704497	0.001	0.001	1.19755		115710085	5.76835	1.09878	1.05542
115704874	15.4364	1.19286	2.44181		115706275	2.97501	6.14236	6.66993		115725524	52.9539	76.3105	33.5097		115697924	0.950111	1.50863	3.86862		115704709	0.001	0.001	1.24485		115704994	6.43552	50.9906	1.17773
115719540	3.2873	0.456068	5.03054		115710423	0.474153	1.7461	0.825558		115717311	3.86458	5.13758	1.90612		115723132	3.34652	1.23527	6.54876		115720124	0.001	0.001	1.30888		115703727	82.0226	72.9063	15.0298
115722006	3.80384	0.0265097	0.602851		115697621	0.691629	2.88835	1.36804		115699597	51.6345	160.006	25.4655		115708110	4.99138	7.14355	20.3141		115724449	0.001	0.001	1.31201		115718852	1.89361	0.543275	0.348287
115722062	1.77445	0.432973	1.47437		115713390	19.9703	54.864	25.9969		115701029	6.34411	9.52001	4.19087		115723034	2.4759	1.85478	10.0742		115717148	0.001	0.001	1.3144		115702507	29.27	47.8013	5.3722
115700273	2.58037	0.414029	16.4215		115696885	8.50815	18.5431	8.81353		115710913	4.18222	9.70347	4.27916		27215498	106.724	157.454	433.878		115721315	0.001	0.001	1.38964		115704843	2.48648	0.262888	0.457409
115721830	25.4023	1.45735	16.0006		115698761	12.1433	26.8391	24.8263		115705704	100.711	363.832	160.564		115712482	14.211	1.40602	7.42036		115716832	0.001	0.001	1.39155		115698089	19.8262	9.92259	3.64588
115719660	9.45139	0.11821	1.49908		115711952	19.0497	39.1646	32.1487		115715109	17.5871	29.4191	13.0102		115725421	6.36012	1.19191	6.28754		115695174	0.001	0.001	1.44261		115698281	8.67456	2.88965	1.59584
115711679	60.3073	24.6073	9.56623		115725667	3.2234	6.93938	3.31052		115715084	8.79164	12.0087	5.33612		115721191	1.07017	0.211758	1.11232		115717939	0.001	0.001	1.45936		115711558	8.21556	15.3562	1.51239
115699930	8.31979	0.107418	1.32167		115719101	21.0666	42.1637	43.0044		115709255	13.5194	21.0998	9.39633		115715608	60.3689	7.56202	244.693		115700981	0.001	0.001	1.52738		115713982	10.1954	0.0718713	1.87736
115710009	4.47595	0.220181	2.40235		115709659	23.5255	48.258	40.6792		115713758	7.17121	5.62395	2.50724		115718931	11.3589	2.42677	12.776		115708710	0.001	0.001	1.69343		115703721	10.7288	1.03664	1.97782
115710269	0.861162	0.001	0.137641		115717458	26.5126	54.3832	46.6687		115698699	29.8438	36.536	16.2932		115723279	3.92864	0.836908	4.37923		115718726	0.001	0.001	1.79213		115707674	1.75316	6.22054	0.323979
115718184	1.83007	0.178364	1.94384		115707819	349.453	715.39	641.337		115699335	28.9112	64.0936	28.635		115721775	15.1734	1.62304	3.72279		115718447	2.3806	0.001	6.68976		115714744	32.63	3.35844	6.02005
115707827	17.2583	0.844505	9.23752		115713623	0.0506187	0.685942	1.34163		115711511	7.90994	10.1572	4.54009		115709178	2.61831	0.612429	3.19728		115698808	0.001	0.001	1.93098		115700956	2.49301	0.001	0.461052
115712771	50.6486	3.99999	43.7655		115707259	0.056385	1.10459	0.532364		115707536	166.049	281.806	125.975		115699620	13.8246	1.26368	6.59911		115699794	0.001	0.001	2.26628		115706147	4.47543	0.643353	0.827059
115722051	2.68911	0.901732	0.429719		115722346	2.18111	4.46137	2.34529		115707252	38.1182	77.9821	34.907		115719380	3.43127	0.207379	13.8797		115717281	0.001	0.001	2.33727		115704609	8.06169	5.47362	1.48918
115697205	15.4278	2.22008	24.1541		115708924	1.14508	2.4623	1.19561		115706563	3.21746	4.81061	2.15541		115722307	16.9456	6.28504	32.8031		115702562	3.41735	4.98925	9.6028		115720542	10.2559	1.38137	1.89504
115718412	71.9843	8.47647	11.5187		115694766	9.07078	34.6491	16.8182		115697543	14.91	34.3465	15.3979		115718711	2.63775	0.98699	5.14385		115700768	0.001	0.001	2.73508		115705513	1.21256	0.060785	0.22488
115712349	1.50129	0.001	0.242018		115712241	3.38648	7.13667	3.46857		115720303	19.3136	30.5126	13.6861		115702722	14.3622	5.30791	27.6739		115700918	3.44332	2.1845	9.67252		115697474	113.247	13.7829	20.9301
115717774	0.207234	0.001	1.30188		115715296	13.4108	28.4048	13.8304		115707114	17.5875	48.3716	21.7274		115725359	11.8255	5.7417	47.8028		115717654	0.800344	4.65072	2.24616		115721383	24.7004	20.5156	4.56725
115708767	18.1502	6.00841	114.187		115704997	0.102993	1.60177	0.0836263		115707122	7.67081	13.1413	5.90348		115714781	6.91187	1.44734	7.52814		115706523	18.984	30.1437	53.3169		115724657	2.40727	2.53695	0.44632
115722745	5.52785	0.371094	0.891914		115716982	5.45975	11.1275	9.90242		115721720	22.7228	27.6696	12.4433		115721596	1.64477	3.15848	6.64057		115723612	0.774601	1.95152	2.17341		115724588	9.89656	19.0283	1.83452
115705312	11.4587	5.57459	71.6952		115709703	8.90927	18.144	12.251		115722512	146.158	209.837	94.3702		115722639	24.5252	4.63566	24.1095		115697041	2.49858	1.37377	7.01357		115699353	812.048	1473.57	150.475
115722168	1.04097	0.196635	2.1127		115716736	3.21584	6.54607	4.97749		115703842	3.29074	9.36487	4.21297		115707665	3.97791	5.25754	16.0463		115706027	14.8436	25.1013	41.6732		115722333	29.9712	42.1853	5.56815
115715233	2.2707	0.001	0.367777		115700814	16.441	34.3897	16.7669		115706619	10.5696	16.6152	5.21865		115714162	12.8862	2.8319	14.6349		115706677	11.1465	4.99331	31.2772		115725121	16.731	5.99185	3.11019
115699646	12.2344	0.120698	1.97947		115698500	8.15156	24.4787	11.9354		115714156	59.7848	223.866	100.745		115714992	1.25318	0.031716	5.04013		115708812	0.001	1.00726	0.814043		115711839	41.81	102.852	7.78157
115699950	3.05908	0.67239	1.60536		115696236	7.53928	36.2566	15.3137		115701059	23.1819	39.919	17.9795		115706173	44.8073	6.88783	35.5096		115705716	17.4621	22.0104	48.9875		115707713	79.6589	10.2218	14.8572
115697161	3.85669	0.234597	2.51539		115723102	20.1076	52.8582	40.8393		115699601	17.2107	31.8445	14.3641		115712893	1.17146	2.25039	4.70479		115710247	7.24689	7.29967	20.3267		115705759	44.2701	13.8361	8.25855
115706505	22.8834	3.67849	39.5825		115700557	1.7391	9.47844	3.5308		115707691	2.35391	7.77481	3.50915		115714438	2.07214	0.550605	2.83318		115695775	0.759872	1.19052	2.12968		115720648	158.057	556.873	29.4966
115719608	61.3129	11.1537	9.95119		115697884	16.8065	44.6017	21.7532		115695664	61.5375	186.604	84.3433		115719376	1.1404	0.27394	4.57951		115719563	1.12602	0.87747	3.1517		115697368	153.037	186.739	28.6097
115725260	16.3678	0.001	2.66408		115706674	161.59	328.365	309.719		115721947	4.65313	6.7007	3.03672		115712984	77.075	11.3461	58.37		115706061	8.37837	5.06874	23.4554		115724949	7.77192	0.347286	1.4559
115706623	41.6166	2.81256	30.2365		115708066	15.406	31.2838	27.3636		115699321	40.8291	108.018	48.9651		115706008	22.2544	1.36222	5.49562		27215502	477.664	520.341	1337.29		115716949	109.604	99.8571	20.5396
115714840	9.87451	2.1803	5.5604		115706793	8.0363	16.3106	13.2711		115710674	3.85754	6.64966	3.01616		115716710	244.824	0.001	60.4945		115702487	10.7266	10.1651	30.0121		115703222	5.41648	0.652573	1.01721
115717301	2.93471	0.331767	0.478978		115703620	8.58519	17.9628	8.76536		115708047	56.3046	199.012	27.8454		115698595	0.266874	0.001	1.06919		115705538	4.2759	6.74192	11.9551		115699550	10.6134	9.22844	1.99364
115700411	19.6296	1.65848	17.7981		115700648	8.95036	18.1585	9.38264		115719252	7.92753	20.6162	9.37527		115703500	6.35389	1.6099	8.26146		115704857	38.4781	82.4629	107.575		115707857	14.3997	4.76675	2.70593
115705861	22.0009	6.17688	3.5899		115716020	29.0882	59.0034	56.5221		115699622	8.11487	17.6033	8.00532		115705272	55.5873	9.64736	49.4953		115712787	10.2154	3.0454	28.5558		115721984	1.74801	0.001	0.329421
115724605	1.65056	0.383018	0.270473		115715742	0.0644713	1.22653	1.25835		115725089	14.2477	36.8394	16.7546		115698066	11.7567	2.09028	10.7104		115724166	1.63093	2.07526	4.55724		115695797	4.06793	0.179153	0.766122
115702336	63.5331	2.63445	10.382		115712684	18.512	37.5247	30.8333		115706902	3.19766	5.43469	2.47485		115697964	10.859	3.13453	16.0579		115701153	0.67608	0.86407	1.88805		115716769	58.1526	118.519	10.9435
115721748	5.93863	0.717983	36.6242		115722396	121.526	246.007	150.816		115699464	20.8597	28.3908	12.9309		115708231	5.58665	1.36078	6.96239		115712658	31.6595	36.0456	88.4894		115721008	6.39046	7.82429	1.20339
115702783	11.2997	2.62914	1.84906		115719564	1.5519	7.72386	3.13158		115706084	1.2917	6.68239	2.6868		115714123	8.71728	1.42258	7.27728		115707112	24.6208	79.5401	68.8011		115722183	23.8843	22.2407	4.4991
115698488	1.2138	0.533295	7.44162		115721327	1.63533	3.30558	2.6979		115703067	8.24231	13.5388	6.1782		115715746	1.22271	0.456562	2.33126		115717256	4.42941	0.001	12.3715		115718971	8.42714	1.7765	1.58922
115711173	0.990039	0.12802	0.162852		115711220	0.040468	0.906387	1.22683		115718881	13.5427	32.0082	14.6291		115698715	0.527685	0.730734	2.11155		115709704	2.5303	1.74425	7.06556		115715662	7.89178	0.001	1.49049
115698272	18.9324	1.64031	3.10154		115697339	11.7817	23.8131	20.6897		115710405	1.32086	5.00847	2.29204		115702705	2.12657	0.89921	8.48364		115706963	1.66807	28.2332	4.65375		115718879	6.62673	0.840632	1.25262
115714025	8.77971	3.06026	53.7008		115714886	5.55766	13.291	6.5216		115716797	123.035	247.731	60.8783		115722645	2.33184	0.518373	2.64452		115699477	9.10965	7.80927	25.4127		115719296	16.3251	3.31173	3.08468
115721232	3.03679	0.0393337	0.498866		115715710	6.97322	16.6698	8.18114		115697201	9.9361	16.4442	7.52758		115706123	9.8745	15.7758	39.3771		115720582	12.9782	16.4632	36.201		115715152	7.59346	0.951527	1.4353
115709392	12.6561	2.3454	24.2384		115707971	124.881	251.75	129.908		115725389	10.8941	35.6829	16.337		115706916	22.8595	5.96454	30.4686		115719895	0.961948	0.547579	2.67979		115706414	154.246	122.743	29.2798
115714933	2.94523	0.159417	1.63106		115712710	9.11588	21.4741	10.5446		115697546	0.745761	3.17476	1.45476		115722557	5.34628	2.13018	21.3051		115698933	8.15646	22.5371	22.7317		115706103	32.1811	7.98191	6.12609
115701364	16.3577	1.38448	2.68894		115705281	5.08469	10.2433	5.79745		115712235	3.60598	13.4898	6.19329		115707864	15.1414	4.54139	23.1745		115709548	3.82873	0.421644	10.6635		115698960	1.42382	0.383379	0.075738
115697266	10.4076	1.48391	1.71302		115718987	10.0642	20.9923	20.271		115722773	39.9855	53.5458	19.7872		115719020	5.12133	8.21492	20.374		115721917	1.00495	0.001	2.79652		115699523	9.27961	5.47398	1.76876
115712201	11.3018	0.08657	1.86203		115702965	7.81464	30.1671	14.8393		115714934	21.2356	92.7719	10.5111		115724139	1.71572	0.397384	2.01856		115705610	4.26686	1.72028	11.8774		115711399	6.45571	3.42348	1.23082
115696837	3.9219	0.661105	23.8077		115715876	4.46712	8.99198	6.19931		115720676	55.617	195.708	90.204		115722164	13.4081	1.60035	8.1364		115699137	55.0589	23.2958	153.284		115721452	6.2485	0.839551	1.19185
115715020	18.8342	1.15018	11.7238		115701237	9.38961	18.8879	13.8277		115716615	5.19628	10.8634	5.01103		115716599	0.693834	0.37556	2.75314		115722326	15.3827	11.1092	42.7888		115696838	1.68109	0.001	0.321287
115713267	8.01743	0.7236	7.36629		115714481	2.21375	4.45176	4.10593		115707886	125.081	252.073	116.297		115703829	9.93211	1.68125	39.4436		115705304	0.425817	0.457058	2.31553		115697989	4.13347	41.1427	0.789088
115722399	7.25696	0.87301	1.2		115725518	484.521	973.131	501.079		115704865	3.57199	6.29276	2.90733		115698190	7.56639	0.157632	1.88305		115714010	59.8074	543.169	166.255		115695828	23.035	22.8292	4.39405
115724571	1.86268	0.315402	11.227		115716750	11.0858	22.2345	14.9858		115712868	16.6846	34.134	15.7693		115705093	1.0618	1.72522	4.21338		115719195	7.75338	8.03218	21.5499		115699218	17.8041	0.0690217	3.39761
115697485	30.224	0.001	5.00063		115697238	69.7572	149.351	74.1106		115704852	8.8541	12.0946	5.59262		115724896	1.97144	0.721205	3.66229		115708034	69.4641	59.639	193.024		115717404	190.352	12.71	36.3728
115720669	42.3738	17.3327	7.01662		115711366	42.3415	86.4845	43.0886		115725528	14.5872	40.9625	18.9402		115714430	1.36055	0.489219	2.4787		115716923	5.95343	2.2192	16.5342		115705057	3.42469	0.001	0.001
115707090	1.04264	0.171941	1.73545		115705124	0.0141667	0.970291	0.914408		115703930	9.46439	22.0294	10.1957		115719004	3.16285	0.673851	3.41383		115705482	3.22754	8.67498	8.9592		115698878	6.86774	0.151069	1.3138
115713634	0.943346	0.239458	1.0751		115714688	5.3676	16.6342	8.29181		115700996	3.4954	3.84598	1.78071		115708229	3.46772	0.404524	2.04221		115711738	9.3559	11.9198	25.9602		115698181	374.092	354.348	71.522
115703972	1.84353	0.304146	0.307414		115708506	1.62155	3.24768	3.70601		115709951	10.7581	14.0432	6.52316		115715831	259.242	93.2074	470.796		115709934	7.58974	17.7853	21.0564		115707664	3.6016	0.772634	0.69019
115708028	16.3783	1.14996	11.514		115707822	10.9822	24.0128	11.9785		115712045	2.39111	2.71907	1.26354		115699864	19.1635	37.8038	75.8414		115719493	3.13291	4.21291	8.6864		115709848	6.37998	9.11579	1.22202
115711163	5.56034	0.235372	0.925647		115725162	5.76614	11.5382	6.44686		115717196	23.1861	39.2477	18.2311		115722353	0.604332	0.739168	2.38825		115707749	26.681	124.683	73.9607		115719274	7.30819	19.6762	1.40144
115716243	5.23398	1.20399	3.11224		115701351	1.71647	5.43398	3.4374		115695879	7.55918	40.5304	3.75131		115719173	6.81061	5.70145	26.9413		115705017	4.37298	10.0057	12.1115		115712542	19.9074	2.84871	3.81667
115714409	6.66056	0.761484	7.58711							115707972	38.497	55.7712	25.9216		115707998	5.74381	1.26147	6.34156		115711276	11.5637	21.1443	32.0169		115717373	13.967	1.41513	2.68096
115704624	25.8375	3.03084	4.31678							115698286	58.643	114.317	53.2154		115719623	12.0509	0.001	3.00812		115723455	11.322	0.54049	31.3408		115697470	18.5556	2.36451	3.56351
115717280	2.53823	0.361515	0.424857							115708511	8.8259	23.6692	11.0221		115722276	17.1601	0.001	4.29529		27215462	80.8235	115.642	223.568		115708859	39.8887	12.0251	7.66851
115718449	6.31666	0.0308097	1.05829							115714254	10.7414	12.1551	5.66229		115705984	1.12943	0.412053	4.45982		115719187	26.7271	13.4786	73.9222		115694737	7.6874	0.216773	1.47912
115700751	1.73769	0.401563	0.881595							115722971	2.6856	15.3075	5.55094		115724927	3.03003	0.400206	2.00566		115704329	5.76914	0.679499	15.9415		115707810	13.7657	0.240795	2.64854
[truncated: 4,049 more rows]

## Sheet: FPKM>1, 0 add 0.001 to all FPKM
Gene_ID	Transcript_ID	Gene_Symbol	Description	gene_biotype	Protein_ID	locus_tag	Flower1_FPKM	Flower2_FPKM	Flower3_FPKM	Leaf1_FPKM	Leaf2_FPKM	Leaf3_FPKM	Stem1_FPKM	Stem2_FPKM	Stem3_FPKM	+0.001 to all	Flower1_FPKM	Flower2_FPKM	Flower3_FPKM	Leaf1_FPKM	Leaf2_FPKM	Leaf3_FPKM	Stem1_FPKM	Stem2_FPKM	Stem3_FPKM		Flower AVG	Leaf AVG	Stem AVG		Flower/Leaf fold-change	Leaf/Stem fold-change	Stem/Flower fold-change		Flower/Leaf t-test	Leaf/Stem t-test	Stem/Flower t-test	All FPKM<1
[truncated: 18,717 more rows]
