# Supplementary material for: Genome-wide identification of cannabinoid biosynthesis genes in non-drug type Cannabis (Cannabis sativa L.) cultivar
Source: J Cannabis Res. 2024 Sep 7;6:35. doi: 10.1186/s42238-024-00246-8 (PMC11380790; doi:10.1186/s42238-024-00246-8)
Supplement: Supplementary file 2 — Supplementary Material 2: Supplementary Table S2. Genes with high or low expression in the flower, leaf, or stem. [file 42238_2024_246_MOESM2_ESM.xlsx]

## Sheet: Sheet1
High expession in flower	Low expession in flower	High expession in leaf	Low expession in leaf	High expession in stem	Low expession in stem
115715123	115704999	115702701	115695897	115723031	115717038
115700526	115701564	115714950	115714118	115720517	115717039
115699293	115712193	115709577	115697837	115705408	115699712
115700696	115713144	115722043	115712368	115711946	115695864
115710121	115697858	115716157	115708948	115717521	115707811
115709026	115712422	115697003	115700607	115712054	115715325
115725554	115700987	115705090	115715003	115704999	115716929
115699665	115700780	115703511	115724593	115720997	115709577
115708947	115717034	115707338	115716605	115696251	115697560
115725415	115715193	115701011	115704652	115721048	115722043
115725410	115707154	115708094	115710473	115697130	115721128
115699015	115697891	115694830	115712106	115724726	115714613
115707391	115718111	115694803	115708167	115707258	115708355
115723456	115721274	115717034	115702668	115715149	115719614
115708124	115694826	115712095	115705892	115707066	115703246
115719338	115694719	115720385	115709440	115694742	115704500
115710361	115725205	115704335	115720789	115699036	115713117
115697568	115711491	115706543	115698064	115718573	115708243
115698238	115716024	115719302	115721874	115715893	115716157
115713185	115696830	115695326	115709850	115718727	115701449
115697755	115712861	115704662	115724770	115716720	115704942
115710028	115712737	115696354	115725422	115720007	115721408
115704946	115724459	115709185	115712253	115714556	115702385
115723377	115703834	115703020	115708131	115706385	115720530
115724705	115721204	115712623	115712146	115715642	115708697
115715877	115725741	115697736	115700871	115698648	115705840
115708181	115698934	115704237	115720719	115724683	115701011
115713215	115715297	115723470	115715816	115714620	115697828
115699703	115697811	115707367	115716455	115721143	115697814
115694904	115713059	115715930	115700705	115717176	115715839
115703170	115714155	115708720	115707596	115715673	115715807
115697587	115721687	115704464	115712860	115710654	115725002
115711958	115712455	115722432	115718155	115703921	115697724
115695866	115725163	115705083	115714386	115707013	115694803
115712047	115703623	115703153	115705218	115694827	115724762
115713025	115721291	115705266	115703569	115721310	115713279
115709018	115711416	115701008	115702709	115714693	115713286
115710210	115717033	115714426	115710041	115722192	115712095
115698156	115723385	115699971	115702436	115714400	115698717
115707136	115701076	115716101	115708966	115698821	115724505
115695865	115715847	115708987	115696872	115697612	115701410
115715875	115719431	115717033	115721259	115699955	115697362
115720666	115714235	115704828	115715792	115707133	115696984
115713148	115699728	115713874	115714009	115712193	115715833
115708712	115708151	115704681	115709587	115698856	115704335
115700907	115716003	115718837	115701267	115712052	115699139
115717038	115700912	115711908	115722029	115715950	115704995
115713862	115723398	115725739	115696963	115715000	115712639
115711569	115724185	115695971	115697760	115725334	115709616
115717039	115697503	115701247	115710978	115718728	115719617
115707234	115717016	115708163	115709296	115722005	115709624
115697699	115714912	115700867	115719672	115704905	115702899
115705717	115697531	115703954	115708111	115696828	115702764
115715178	115711472	115723004	115697576	115711675	115711534
115713171	115700429	115698103	115704660	115697858	115696934
115707531	115724614	115705559	115712883	115725711	115719767
115724810	115701243	115716827	115723558	115696650	115707937
115721849	115712166	115712262	115712504	115720561	115725646
115699712	115697489	115698773	115711100	115696230	115721690
115695864	115694862	115725060	115717999	115704652	115712623
115707811	115698709	115720837	115698079	115721364	115701203
115715325	115716771	115711302	115700827	115708777	115708734
115718532	115721161	115724416	115715986	115708167	115712629
115713205	115724630	115718599	115707554	115715931	115695781
115722991	115701567	115698263	115719239	115718729	115710104
115704407	115721940	115716971	115723269	115719496	115709512
115712518	115702980	115721731	115724176	115700987	115724986
115719236	115699693	115701795	115697232	115717024	115723014
115718871	115703031	115705036	115710276	115720308	115720977
115716929	115703023	115706443	115698900	115700226	115722038
115707961	115701322	115716283	115704667	115720993	115703115
115702367	115714792	115722431	115706400	115705892	115724983
115723393	115717105	115714880	115700595	115708648	115721441
115704879	115697513	115695556	115709434	115698635	115697536
115717402	115722669	115711472	115708894	115718414	115715691
115695928	115711548	115723044	115707161	115718634	115719616
115705012	115710133	115702389	115699384	115702524	115699199
115716911	115721366	115696206	115703792	115698844	115706950
115716346	115715626	115722778	115712063	115698797	115698729
115713864	115711229	115724727	115710159	115711243	115706491
115699876	115717628	115718806	115714311	115718158	115715486
115721427	115705896	115697975	115717186	115724666	115695784
115724718	115708854	115722945	115706696	115701405	115706946
115725713	115711669	115705586	115704907	115724215	115721015
115722650	115707210	115717243	115708791	115711048	115697885
115722611	115708264	115706129	115710150	115725259	115709567
115714483	115713057	115715712	115716742	115717078	115712603
115700854	115714581	115700236	115709841	115723402	115722432
115697880	115695891	115715920	115712050	115710044	115698185
115719756	115721783	115698045	115706985	115706515	115716884
115706609	115718652	115722405	115704760	115706198	115716879
115707556	115722337	115722669	115722234	115706969	115723007
115712238	115716855	115702763	115724992	115698978	115705083
115701261	115706441	115699224	115704372	115712081	115698388
115695656	115720531	115708267	115710106	115716286	115715731
115707135	115720788	115696214	115712132	115715193	115720602
115725058	115712362	115706500	115697767	115719808	115714088
115723437	115719095	115711183	115715758	115697891	115700897
115723301	115713090	115706424	115724170	115718155	115723284
115709065	115719513	115711648	115716590	115714668	115724567
115725715	115724160	115703531	115710127	115709609	115723428
115722058	115719423	115707210	115720084	115709869	115710182
115703201	115715647	115707366	115716543	115709300	115701324
115724480	115705222	115714581	115716756	115698657	115716658
115697567	115697175	115708157	115718558	115708820	115708949
115705025	115701485	115714527	115711044	115697363	115717037
115714748	115715226	115714839	115706178	115694826	115709849
115698199	115725440	115698914	115708926	115718511	115700488
115724498	115722123	115701058	115710128	115725205	115703566
115723168	115722699	115711601	115714406	115708910	115716550
115707440	115716446	115707549	115696958	115714376	115712053
115697560	115715013	115702425	115705047	115696963	115714592
115711658	115714735	115705581	115719501	115697760	115712494
115723438	115723013	115723046	115718570	115711491	115707033
115708775	115696836	115705222	115721814	115708111	115723320
115703581	115700594	115698664	115716758	115716024	115698645
115706133	115705863	115698935	115719177	115696830	115712923
115704745	115697135	115721865	115703186	115712117	115707844
115709271	115698165	115707030	115713830	115712861	115697716
115696884	115716853	115723422	115724062	115701079	115695883
115704778	115712620	115707498	115704567	115695851	115708694
115704977	115700934	115697584	115699595	115710435	115695780
115710309	115714959	115711912	115719217	115698586	115722837
115708341	115707439	115712493	115713754	115706997	115718963
115718623	115704867	115701311	115713375	115707913	115725166
115695926	115721804	115725738	115722765	115724459	115715979
115724622	115725181	115703202	115703644	115718857	115700274
115702423	115716854	115695900	115719502	115721385	115698497
115714455	115720793	115707439	115722986	115703834	115718049
115722674	115698176	115700756	115702666	115705977	115719620
115722264	115715667	115698882	115716295	115710215	115703790
115710100	115698628	115698309	115724464	115725741	115715333
115701253	115705313	115725330	115711375	115698934	115717308
115719465	115717483	115702395	115713776	115722063	115701069
115704341	115723219	115699708	115712516	115719239	115704622
115711687	115721754	115717728	115714731	115697119	115706808
115725761	115704803	115716934	115698254	115697023	115701093
115714613	115702049	115723219	115702733	115716715	115714005
115712602	115725612	115704803	115725400	115719811	115713036
115725549	115717049	115719612	115713000	115703559	115701300
115700917	115714331	115699454	115702309	115697811	115712096
115702442	115703587	115702697	115709974	115713059	115714202
115720519	115709481	115718171	115709424	115709434	115701793
115722321	115717484	115722556	115697720	115708894	115697500
115725574	115711104	115707365	115715029	115721966	115716320
115716002	115717229	115701179	115708017	115721687	115710511
115715896	115706511	115704140	115719066	115715918	115706025
115695930	115720196	115698646	115698848	115713612	115695971
115714637	115709632	115715307	115694734	115704419	115701247
115699830	115698262	115694770	115709862	115725594	115709061
115710321	115715307	115699312	115714075	115715215	115700504
115697959	115695708	115701000	115699500	115703623	115708163
115717219	115722498	115698716	115717662	115721983	115716463
115724716	115706270	115704620	115722385	115707634	115700730
115704743	115695990	115713227	115719748	115695753	115708026
115719336	115701284	115705563	115725580	115716831	115714006
115697754	115708900	115704970	115703584	115719146	115717353
115705745	115712757	115706020	115719749	115704689	115714607
115697762	115725392	115708914	115714076	115723464	115703954
115716578	115724110	115706260	115714078	115695961	115724640
115704428	115699128	115698783	115709116	115722108	115720594
115714813	115694846	115697365	115708823	115721291	115705239
115722957	115725712	115709788	115699118	115711416	115711929
115721876	115696759	115716184	115717427	115720979	115698030
115703665	115706260	115708266	115711944	115697170	115712828
115705016	115709911	115724694	115710251	115719812	115698764
115708787	115719542	115700207	115716830	115723385	115704880
115725388	115697440	115716254	115725291	115712188	115722960
115708355	115701275	115725233	115720678	115720851	115708136
115722956	115701290	115711594	115698217	115701076	115694739
115714807	115705991	115722281	115699054	115712115	115712372
115707560	115705216	115702588	115711381	115694734	115698773
115712311	115716357	115699412	115716945	115707640	115709566
115715947	115715704	115700717	115696865	115715847	115715183
115706756	115719254	115724721	115705261	115717427	115725060
115695527	115704555	115711657	115702964	115698881	115698573
115707431	115725233	115714535	115714504	115697113	115712850
115711953	115707797	115717257	115694711	115723037	115714610
115712950	115721269	115712676	115711996	115725180	115712274
115709775	115698860	115708741	115722790	115721415	115725626
115721896	115696999	115704108	115706329	115708902	115718599
115722367	115698989	115717442	115713030	115696908	115716971
115696909	115704641	115718777	115714604	115698217	115697853
115722402	115705630	115723304	115698651	115702379	115695882
115699225	115701170	115705990	115699453	115725573	115701582
115711394	115696842	115722476	115716054	115698260	115714351
115705062	115719363	115725263	115703601	115698558	115705036
115701144	115722670	115725061	115724189	115701228	115722411
115710334	115709472	115708655	115715120	115720683	115706443
115695382	115699165	115714180	115704163	115710057	115705362
115700792	115701723	115717182	115706501	115702488	115721954
115724685	115722668	115698612	115705237	115696542	115722431
115712570	115718777	115696826	115719466	115719431	115719357
115701584	115698077	115704830	115707446	115724555	115712147
115698225	115709007	115711907	115715166	115699453	115697527
115720931	115700949	115700808	115710343	115706501	115707816
115718168	115716639	115704804	115699159	115721187	115698725
115711605	115697107	115725109	115712540	115707268	115723210
115704294	115714711	115724539	115724530	115710343	115716632
115715779	115704151	115718932	115707696	115719147	115700519
115699020	115709663	115715813	115715242	115714235	115722323
115719008	115725756	115716079	115725222	115699728	115723352
115711257	115704804	115716284	115725099	115706951	115719355
115696476	115724539	115699431	115700486	115708151	115721014
115723347	115695743	115707698	115723213	115711961	115724785
115709751	115725319	115716468	115709056	115718565	115719458
115703182	115717273	115707843	115704432	115707813	115714465
115700968	115707465	115718740	115704798	115707831	115714770
115723232	115699431	115717101	115700539	115725207	115724789
115724675	115707491	115706284	115712315	115703199	115715775
115720771	115725231	115700759	115707813	115723398	115704044
115725729	115700759	115702651	115721032	115715648	115722214
115697695	115707425	115701095	115697525	115698574	115722778
115705684	115715741	115715658	115712997	115722181	115718806
115718392	115708940	115722196	115704175	115714912	115722945
115708921	115719622	115701190	115697791	115714130	115705586
115719614	115715768	115718604	115714867	115711137	115700275
115708255	115721141	115707282	115705365	115697531	115717243
115712431	115724873	115701450	115710062	115719438	115723236
115696267	115722896	115713180	115722181	115696705	115706129
115716935	115695661	115720924	115725267	115717986	115715087
115712087	115725053	115717003	115716530	115725556	115700236
115703246	115719275	115719275	115701287	115711554	115702977
115712261	115714632	115712719	115699742	115698672	115722895
115709440	115700747	115722407	115722728	115709972	115715920
115698170	115712233	115697903	115724724	115718454	115706050
115697697	115717376	115713865	115716207	115713728	115704602
115725506	115714479	115704994	115719438	115697794	115698045
115694843	115715128	115695587	115716021	115713214	115722405
115715733	115695604	115716580	115699433	115724614	115699224
115704690	115725714	115707674	115722002	115722429	115697592
115716735	115718954	115711322	115707723	115707946	115700738
115704500	115699694	115708334	115700026	115698891	115720575
115702478	115713069	115715128	115712489	115700299	115706500
115715277	115698812	115725714	115722828	115718515	115708523
115716167	115698854	115706721	115700857	115701243	115700903
115699148	115705845	115720648	115723715	115719499	115716281
115707574	115702596	115707682	115706565	115712640	115706424
115714857	115720724	115701498	115712066	115705890	115717391
115698060	115718720	115709575	115724858	115715760	115715278
115721313	115710554	115713941	115694801	115704625	115715127
115713117	115706736	115699345	115703762	115725199	115703628
115709442	115702739	115710567	115712815	115706953	115707366
115713254	115706709	115717341	115705890	115710308	115697373
115707141	115699161	115697744	115697437	115708058	115721752
115720789	115699908	115695974	115715761	115719364	115706302
115719710	115695670	115706976	115699115	115697489	115714928
115725633	115697293	115712965	115714558	115706792	115698627
115715587	115706836	115717275	115720088	115720952	115700296
115709853	115697164	115697431	115720952	115694862	115714527
115719346	115723684	115712250	115702750	115703608	115714839
115724732	115698284	115725293	115716717	115698849	115701033
115708243	115705355	115712801	115704916	115723039	115698056
115718458	115724851	115708221	115702647	115705373	115715228
115712149	115704882	115707082	115722798	115702750	115706477
115699017	115707473	115722940	115710216	115704916	115704553
115715995	115700893	115712564	115706296	115700964	115714568
115714542	115705554	115714407	115722662	115717430	115699242
115701449	115720961	115706724	115717210	115724964	115725165
115717268	115721882	115699770	115700869	115712764	115725275
115723249	115723435	115719266	115698841	115710216	115701058
115701195	115714134	115716472	115725640	115717210	115711601
115704942	115701189	115716781	115708679	115700869	115702425
115721408	115725542	115719615	115711420	115698841	115705581
115702653	115719231	115700524	115701200	115709049	115717321
115698017	115713111	115712741	115697766	115724630	115710658
115697886	115716397	115715706	115715855	115708679	115698322
115702385	115712526	115723684	115702055	115720877	115704594
115714165	115721064	115697988	115697788	115702980	115716265
115720530	115718897	115707294	115711949	115721426	115725665
115719821	115714073	115696956	115714498	115699693	115705851
115708697	115716986	115708275	115724204	115706564	115696902
115712176	115707716	115714034	115710026	115703031	115721865
115714457	115706831	115718410	115711672	115707573	115714925
115723055	115714383	115706326	115714244	115705860	115700694
115706528	115714329	115698953	115715331	115711617	115723422
115718796	115698979	115699366	115714751	115712528	115725620
115705840	115707257	115707473	115701321	115722694	115703634
115724088	115697537	115718142	115721392	115714958	115695993
115725622	115698677	115714669	115701346	115706159	115718960
115699323	115704682	115714229	115717452	115707279	115707498
115704143	115699562	115700574	115711945	115705891	115701434
115709850	115700549	115700650	115712350	115714244	115694820
115698901	115714703	115716684	115724897	115715331	115717307
115723515	115701091	115708324	115722717	115704439	115704523
115697828	115695867	115714134	115710492	115725169	115717976
115697814	115709768	115701189	115695898	115724084	115698700
115708313	115714782	115716795	115698596	115699008	115712493
115715839	115725384	115713111	115716919	115703023	115724709
115715807	115713888	115725225	115708993	115725342	115707182
115725002	115703736	115721300	115719780	115709085	115706225
115710205	115710227	115710301	115705770	115716755	115698303
115697724	115711342	115709846	115700665	115717120	115703202
115723346	115715131	115705832	115721102	115715175	115712924
115717395	115709750	115725295	115714708	115722087	115696870
115724762	115709252	115721064	115723418	115714792	115708883
115713279	115702738	115700797	115709286	115721392	115697658
115712336	115719491	115709267	115722876	115702070	115707221
115700676	115709433	115706508	115699750	115724897	115699220
115698779	115718794	115724169	115698141	115707478	115698309
115710600	115697843	115721182	115705647	115698240	115722775
115724717	115712234	115700030	115716166	115697024	115704094
115708131	115717001	115712086	115717416	115703317	115708126
115704267	115707589	115711388	115699505	115719780	115698033
115713286	27215475	115701116	115715324	115697513	115724688
115716805	115709211	115724183	115716965	115700665	115725330
115705021	115706648	115705010	115723198	115706233	115702395
115723057	115715302	115707678	115714874	115714708	115725080
115718399	115697049	115707257	115702619	115712514	115709471
115698717	115705625	115719033	115700961	115710080	115695793
115702390	115706470	115697537	115716296	115695892	115699532
115704640	115699540	115698677	115704043	115695605	115709619
115714653	115702757	115723332	115719768	115696706	115700506
115713904	115699501	115709008	115705349	115698966	115704268
115724505	115718292	115711893	115715218	115697561	115720918
115706431	115707470	115713730	115702429	115705647	115719612
115706394	115704700	115697824	115717750	115709035	115714622
115724633	115715052	115701248	115704761	115699505	115709304
115718819	115722520	115707565	115717529	115704978	115702697
115701410	115719318	115711845	115725032	115723198	115707892
115700282	115720122	115707399	115697048	115715921	115709370
115711516	115709455	115703911	115708768	115710354	115717103
115717424	115716060	115708836	115695674	115714874	115702104
115725581	115703931	115707281	115701709	115697385	115718171
115697362	115709251	115706142	115701508	115721366	115714544
115724889	115704374	115703001	115715806	115715626	115720850
115696984	115718144	115707875	115708312	115709103	115707962
115712860	115714531	115709361	115717444	115700961	115713184
115724982	115722425	115709644	115708930	115711229	115700787
115705985	115714342	115708909	115699684	115715663	115722556
115714062	115716536	115705120	115723414	115715146	115698070
115708307	115714215	115699305	115709034	115717193	115707603
115715833	115708657	115712469	115724564	115713610	115699288
115702709	115720651	115705453	115715591	115724460	115707365
115699139	115723182	115698825	115706153	115704783	115715585
115704456	115725480	115705156	115724607	115696940	115701179
115704995	115708667	115723856	115723117	115717628	115704140
115721955	115696845	115710033	115697650	115698673	115698646
115724631	115698535	115707718	115715890	115705896	115703134
115696872	115714799	115720677	115711304	115701206	115708719
115704998	115699459	115706318	115703610	115698193	115696993
115698494	115717094	115721071	115714543	115701523	115712403
115712639	115706006	115724662	115715814	115703284	115694770
115709616	115710295	115709630	115716038	115711669	115699719
115707570	115705325	115721350	115700569	115696927	115698716
115724730	115702632	115707411	115704666	115715620	115701338
115697967	115701707	115703736	115719683	115697950	115715751
115712289	115707923	115725088	115694773	115715217	115704970
115701221	115725012	115697314	115702799	115698539	115706020
115721723	115698884	115725701	115698546	115707529	115705594
115710224	115717092	115697209	115720900	115712018	115711158
115708989	115701705	115716276	115702729	115708735	115725545
115704534	115714921	115715937	115706669	115708264	115698783
115716241	115694757	115712845	115697384	115707153	115701515
115699451	115702949	115718794	115723355	115712162	115701490
115709624	115705972	115704893	115721920	115712267	115698766
115695663	115719946	115712566	115704899	115718445	115717378
115722029	115706412	115706440	115697859	115708974	115711557
115706798	115701191	115709712	115714681	115718535	115705602
115709296	115706667	115719308	115695540	115695674	115715219
115719672	115715187	115714200	115706695	115716418	115724694
115697576	115720804	115712234	115708293	115708189	115716254
115703059	115715911	115705278	115708817	115721992	115715485
115712381	115709647	115709866	115702189	115701508	115716883
115709933	115709873	115720381	115708081	115700277	115709045
115721229	115704022	115714433	115711709	115707034	115700242
115702764	115708939	115699070	115723574	115712572	115698313
115707525	115701675	115707589	115699179	115716856	115711594
115711534	115716891	115705055	115702587	115709282	115695852
115698969	115706452	115725156	115700873	115708930	115711588
115703740	115707751	115715302	115712197	115699684	115702881
115717437	115705197	115709698	115702690	115704826	115706571
115725520	115725331	115706689	115707354	115709034	115724075
115714419	115724834	115704971	115705031	115721894	115697761
115700969	115716423	115711843	115703643	115718652	115714280
115696934	115702623	115712755	115707692	115701460	115721852
115696242	115723447	115717377	115701299	115721829	115695939
115703034	115708487	115700859	115702316	115724564	115699388
115698661	115708372	115715926	115706407	115715225	115700717
115707963	115699354	115712401	115714360	115698308	115724721
115695350	115705712	115720766	115695896	115715113	115705677
115714629	115725443	115721329	115725654	115716164	115717257
115706498	115725170	115714260	115699573	115704968	115712676
115724920	115705258	115722454	115719397	115722337	115695895
115719767	115721418	115707938	115700479	115716855	115722025
115697865	115699098	115715052	115697512	115706441	115695742
115705934	115716339	115712729	115722580	115711150	115704108
115722061	115724360	115719019	115703562	115714543	115706688
115701493	115710164	115705395	115724140	115698836	115711679
115705058	115724729	115714578	115699297	115725611	115706263
115721125	115701704	115709455	115705423	115704442	115725263
115725646	115712688	115715671	115708872	115725047	115725061
115700827	115721278	115717004	115714623	115710254	115706019
115721690	115700712	115721369	115705859	115706177	115714180
115697909	115707433	115703931	115724658	115712263	115717182
115724887	115716623	115708770	115704049	115696852	115705814
115706480	115700067	115704957	115718906	115712183	115698612
115701203	115725644	115709251	115701296	115714548	115718750
115701164	115706979	115697299	115711194	115707919	115711842
115701500	115724089	115702326	115722351	115723355	115717453
115707554	115712511	115697472	115706432	115704610	115700920
115696266	115698775	115723010	115704851	115721920	115720669
115716135	115722116	115713964	115698243	115714681	115718919
115708734	115705912	115698702	115700070	115724954	115723009
115722048	115708713	115698287	115707571	115723574	115725109
115720709	115716252	115718993	115703155	115699179	115701578
115715223	115714717	115697648	115715781	115700416	115708831
115698701	115721703	115722425	115704676	115712197	115716468
115723190	115695048	115695418	115697202	115708874	115712061
115713995	115699430	115709756	115722445	115701376	115706892
115723228	115720572	115715199	115718808	115694795	115703372
115703130	115700337	115704224	115715681	115707692	115718504
115710104	115725315	115715618	115704818	115712272	115718918
115709170	115703215	115717331	115724111	115718674	115707843
115716817	115699380	115706712	115708343	115699381	115718740
115696966	115705536	115718474	115705791	115707515	115717101
115707414	115714093	115715771	115702915	115724160	115706284
115721147	115725247	115712490	115705762	115698916	115711340
115697283	115709610	115708326	115700445	115721738	115715784
115709512	115716692	115709427	115707174	115719423	115723370
115724986	115708428	115703200	115712502	115719625	115711146
115723014	115716412	115717636	115722995	115715647	115722324
115702758	115705903	115712109	115709568	115699573	115703068
115722090	115719453	115704538	115701397	115721891	115702651
115710201	115695842	115719763	115699420	115697512	115697307
115697232	115723068	115701239	115714133	115711454	115719031
115710460	115710268	115707657	115698798	115697144	115722196
115697004	115711602	115698581	115716457	115712939	115700453
115703179	115705626	115695443	115719000	115712206	115722629
115701553	115716733	115706253	115708674	115697175	115707282
115704667	115699690	115706191	115711696	115701485	115701450
115715878	115712598	115705299	115720540	115714676	115711764
115720977	115699632	115715294	115698954	115699478	115706149
115711919	115717309	115705772	115715645	115698617	115715735
115700966	115715124	115696240	115718869	115725440	115722232
115724980	115706164	115702898	115709667	115715808	115706358
115712529	115705077	115703656	115714211	115724122	115722407
115724548	115715680	115700187	115698626	115706862	115724689
115700828	115709388	115718093	115710226	115705423	115697903
115723056	115716757	115705438	115717403	115705859	115714863
115700881	115714183	115702372	115724653	115704049	115707841
115700595	115718472	115700765	115717110	115706168	115704994
115707129	115723286	115702949	115707401	115718433	115703727
115701432	115704857	115716353	115698312	115709564	115702507
115699384	115707112	115716208	115702747	115714651	115698089
115703115	115706963	115718564	115721778	115721833	115711558
115703792	115698933	115718439	115716411	115711194	115707674
115698706	115714010	115694953	115723029	115713490	115704609
115705297	115705482	115703051	115696310	115708841	115721383
115703063	115709934	115697324	115713399	115710082	115724657
115724983	115707749	115707738	115706835	115708840	115724588
115697060	115705017	115700744	115705033	115710102	115699353
115725418	115697460	115723128	115725780	115696914	115711839
115720471	115724950	115698880	115699516	115715013	115720648
115721441	115721264	115700587	115700336	115716560	115697368
115712177	115705593	115704418	115723376	115714735	115716949
115699396	115698834	115724625	115723381	115708224	115699550
115712911	115724518	115701640	115712775	115704818	115716769
115724135	115719098	115700836	115724125	115707693	115721008
115717388	115716096	115699480	115719041	115715659	115722183
115706117	115705515	115724610	115704680	115697887	115706414
115702761	115697025	115704022	115694767	115723013	115699523
115717186	115699705	115719379	115721157	115705875	115711399
115697758	115712195	115716464	115702373	115717082	115695828
115695955	115707313	115708321	115706083	115701282	115698181
115723302	115706269	115700962	115708744	115700594	115709848
115714709	115709371	115714122	115706494	115697135	115719274
115721179	115711540	115717835	115721919	115700445	115714263
115696976	115713034	115714167	115710396	115717320	115725202
115699292	115708651	115701414	115698258	115702662	115697744
115721006	115705182	115721231	115706085	115702995	115706229
115719616	115706223	115702815	115706421	115698165	115712965
115706309	115723285	115719427	115709626	115723453	115717275
115714777	115715078	115701809	115715330	115697825	115713658
115708262	115710176	115707644	115725526	115712620	115712250
115699199	115709929	115698108	115703642	115712443	115719568
115708791	115697188	115701009	115719005	115700934	115705298
115719337	115706939	115724840	115698911	115714133	115696979
115701418	115725784	115701281	115694961	115708861	115722394
115706950	115706577	115708663	115718020	115716457	115719630
115711305	115706493	115722491	115702677	115714137	115699677
115698742	115721832	115704834	115707428	115702454	115714407
115698729	115703939	115722270	115723426	115725181	115709168
115703618	115712210	115711410	115695606	115709482	115699770
115724740	115712794	115700638	115710739	115707468	115702350
115697225	115720836	115724871	115709461	115720793	115725364
115701423	115709290	115706278	115701238	115724608	115716781
115725477	115702926	115712709	115714582	115708762	115705907
115720930	115713929	115703002	115706886	115700547	115723405
115724623	115699067	115725170	115711294	115713399	115708726
115703025	115716235	115707927	115714466	115700336	115700524
115698039	115719433	115718945	115716407	115715871	115699462
115710150	115715676	115714523	115716159	115712775	115715706
115707418	115700915	115712060	115700771	115724125	115715095
115724257	115715873	115698003	115705733	115719041	115697988
115706491	115702931	115713039	115720702	115709701	115696956
115716405	115718941	115708738	115711379	115714404	115719525
115705982	115707957	115697505	115706345	115721919	115723093
115706454	115712995	115697918	115718760	115714126	115721871
115700243	115719242	115713105	115722833	115712461	115706192
115715486	115716915	115699502	115707045	115706859	115714034
115720967	115701577	115712254	115709859	115724126	115699524
115724494	115719277	115704727	115702726	115717863	115703636
115716742	115706576	115715650	115697475	115722205	115695959
115706946	27215476	115714924	115723144	115711444	115715057
115709841	115695831	115712925	115699904	115702049	115699460
115695910	115708484	115709943	115708827	115708302	115718410
115721045	115705181	115706303	115723032	115698674	115707975
115696869	115709360	115695660	115719644	115704748	115718142
115715301	115720595	115695287	115700641	115699393	115714669
115722064	115705357	115708099	115710195	115694961	115714229
115716990	115715651	115719303	115704199	115695606	115700574
115715914	115697338	115697596	115721861	115712621	115714820
115697416	115721238	115721178	115702519	115701238	115697275
115725677	115719059	115715579	115713079	115699364	115716795
115696900	115725213	115706156	115701222	115709481	115702407
115708786	115706435	115722455	115708722	115710391	115722853
115706985	115718146	115706369	115717012	115714582	115717084
115712817	115717091	115698810	115724118	115699774	115710301
115704805	115700107	115712007	115724127	115708929	115719619
115697141	115703806	115696992	115712070	115717229	115725295
115725398	115705469	115723440	115708338	115707956	115716187
115723243	115719652	115698721	115695654	115700771	115700797
115717159	115719082	115716451	115701393	115722667	115709267
115722430	115711925	115713952	115711391	115700775	115706508
115705746	115712758	115699430	115711998	115702982	115704930
115720674	115711278	115722760	115724603	115697071	115725519
115716063	115698584	115709801	115708135	115722498	115723113
115723413	115699248	115697467	115711982	115725648	115724169
115710122	115723477	115702667	115705484	115701284	115711480
115712603	115717117	115715161	115701481	115708900	115709797
115707204	115702523	115716712	115700772	115701717	115700030
115710129	115724216	115699215	115702784	115721861	115705732
115702765	115716221	115713266	115713475	115710260	115696924
115708699	115719526	115704897	115695768	115718089	115705724
115707548	115702870	115705323	115712296	115722688	115715576
115696941	115714951	115705220	115713012	115708722	115721440
115717562	115714852	115711609	115704317	115701306	115705010
115705041	115721987	115704012	115725363	115712757	115716232
115716879	115719388	115700219	115720645	115717901	115712001
115708082	115703565	115708897	115698149	115708338	115716198
115709473	115705223	115725651	115705455	115724603	115699444
115722397	115699670	115699386	115708103	115708135	115716846
115705180	115709904	115705435	115721363	115705484	115725387
115695868	115725565	115705882	115722916	115710103	115704537
115712849	115707180	115707772	115705703	115713475	115706986
115716251	115696913	115723330	115703612	115698755	115707565
115700736	115707608	115703236	115721811	115711298	115704800
115698388	115722553	115723429	115702787	115695768	115711845
115709207	115721825	115713072	115719184	115713012	115703911
115708117	115719599	115717352	115707061	115725363	115712453
115714784	115709547	115716292	115707982	115710117	115700494
115707746	115715257	115716083	115725045	115722759	115722111
115707958	115705150	115722157	115704295	115719184	115706616
115702768	115713900	115699678	115699046	115696861	115708077
115704837	115695627	115709544	115721725	115704750	115719500
115711701	115712300	115704992	115699125	115697354	115708954
115702315	115711948	115695794	115710330	115713958	115707281
115713319	115717069	115697639	115702639	115721254	115705719
115724170	115705225	115701050	115708652	115721198	115703001
115721737	115695943	115716733	115701381	115721725	115709361
115716590	115701706	115722900	115708661	115710330	115709644
115699278	115704068	115695655	115716326	115715987	115708909
115704833	115707582	115712119	115696960	115696960	115699383
115720684	115707741	115706125	115709721	115704535	115716732
115712533	115716154	115725657	115702728	115704555	115697309
115710127	115695876	115712506	115712114	115701162	115721879
115720084	115701215	115709363	115704535	115708192	115722882
115716543	115709736	115720621	115715005	115697082	115698825
115702670	115706805	115701465	115701162	115704768	115695667
115723284	115699055	115723244	115722230	115725662	115707718
115712902	115704650	115707452	115724186	115718430	115700624
115716756	115707558	115703767	115710120	115725328	115720677
115707597	115718285	115712179	115704768	115706090	115707434
115721856	115724820	115708199	115698132	115715978	115721071
115725218	115706920	115709299	115720761	115705501	115697444
115702769	115718418	115694676	115718429	115709071	115704657
115702426	115703603	115715680	115705501	115725616	115709101
115714443	115722763	115713788	115700426	115712852	115724662
115718545	115706774	115716757	115710015	115697330	115719126
115714787	115718476	115714183	115706232	115712743	115724756
115702417	115709331	115708766	115701166	115698989	115725701
115718558	115696878	115712594	115698592	115717384	115699121
115716291	115708216	115708183	115700720	115698757	115706291
115711044	115700994	115716767	115711171	115721974	115724137
115706178	115721967	115711954	115708332	115705630	115697759
115700007	115716636	115719040	115707516	115698568	115698780
115708926	115702608	115722248	115709235	115698314	115712845
115710128	115724611	115715837	115711187	115707181	115700671
115723901	115707646	115718490	115708172	115713840	115717709
115716658	115721916	115717164	115715595	115695824	115712566
115702505	115716158	115702780	115707496	115698964	115697673
115714406	115711963	115707951	115697518	115714469	115702361
115705340	115708497	115715664	115707181	115716367	115712932
115696958	115719204	115703561	115708280	115700700	115707677
115699101	115722305	115723359	115721307	115720598	115707416
115716930	115694717	115707945	115703651	115704090	115715111
115719501	115707557	115694744	115723607	115697510	115709866
115717018	115698896	115696458	115704918	115699499	115720381
115706393	115701977	115721180	115708941	115695986	115714433
115721814	115722499	115709971	115698964	115696716	115699070
115716758	115714846	115706963	115708178	115704205	115697165
115715687	115700593	115724470	115709690	115719385	115709698
115704959	115717667	115718890	115700700	115708164	115707598
115709921	115711662	115716744	115709404	115697154	115721252
115702321	115708024	115709910	115703684	115700725	115724090
115709849	115707524	115714010	115699482	115707911	115705680
115695755	115702924	115721965	115701378	115711110	115711843
115704569	115723363	115701361	115720598	115701048	115708828
115710699	115697881	115709518	115698223	115698967	115712401
115719177	115712227	115709882	115715250	115701723	115720766
115708988	115707419	115698834	115707999	115709164	115716714
115704526	115709811	115715709	115706952	115698191	115697611
115717190	115706411	115704965	115706215	115720781	115721329
115703186	115699614	115724518	115696716	115700273	115722454
115704567	115699418	115716103	115722295	115709980	115716280
115699595	115703582	115698859	115698241	115711162	115725311
115700488	115701250	115704506	115697719	115708252	115714550
115708772	115700478	115699746	115719385	115717130	115712729
115707820	115707612	115716465	115705117	115724093	115712669
115724861	115697367	115707158	115697978	115717774	115705395
115713694	115715705	115715246	115712694	115708767	115723625
115716048	115718758	115719042	115717451	115724465	115705026
115716550	115701451	115711360	115697154	115708285	115696879
115707185	115701576	115721294	115700725	115705312	115717971
115716885	115711244	115719246	115707911	115722656	115717004
115725040	115707297	115708234	115708101	115697734	115711967
115713754	115725003	115716162	115705685	115695668	115708770
115705837	115700246	115719777	115702731	115707563	115714313
115702734	115704753	115713329	115699259	115707132	115705262
115715100	115724117	115701459	115699637	115704601	115704957
115713375	115712872	115724972	115698912	115695630	115697299
115722400	115700899	115707288	115703666	115721748	115702326
115718397	115712793	115709371	115705817	115701464	115697472
115700335	115716511	115712725	115700727	115698488	115723010
115699041	115712896	115720991	115719540	115697615	115702383
115722416	115706084	115709818	115700273	115708287	115707994
115722765	115722971	115722864	115721830	115714025	115698702
115714592	115723126	115702804	115719660	115697575	115716803
115716703	115706813	115725742	115699930	115707272	115698287
115695638	115698761	115705611	115710009	115696837	115697648
115711509	115719101	115713739	115718184	115725756	115718974
115713239	115707259	115695574	115707827	115706822	115711449
115720685	115696236	115705531	115712771	115724571	115715199
115715744	115723102	115722596	115697205	115703864	115704224
115712494	115700557	115716614	115712349	115698740	115706712
115719502	115715742	115705883	115717774	115716109	115700192
115699432	115719564	115710289	115708767	115698809	115718474
115723320	115711220	115705129	115705312	115703614	115717397
115698660	115718987	115704245	115722168	115720943	115715771
115705315	115705124	115708274	115699646	115695743	115712490
115724433	115701351	115697188	115697161	115722968	115696846
115721411		115705693	115706505	115709264	115699415
115712923		115712273	115725260	115708062	115714153
115713994		115711956	115706623	115724456	115704770
115707844		115714646	115700411	115714911	115706826
115723241		115724915	115702336	115717273	115712109
115713877		115725694	115721748	115723735	115719763
115702666		115698204	115698488	115700902	115709359
115697716		115707166	115714025	115722334	115714175
115695883		115701777	115709392	115722891	115707657
115721784		115716613	115714933	115721803	115700461
115708694		115698129	115712201	115695578	115723292
115716295		115702935	115696837	115716111	115706478
115718683		115725624	115715020	115698559	115725666
115695780		115699067	115713267	115712026	115699553
115722837		115705080	115724571	115697316	115705775
115723345		115710781	115697485	115721836	115723165
115718963		115708342	115707090	115724831	115696240
115702591		115699371	115713634	115711262	115700564
115697313		115704903	115708028	115721733	115708751
115704848		115713817	115711163	115706045	115703656
115712389		115723049	115714409	115697412	115712068
115724771		115714101	115718449	115700821	115708272
115715979		115704363	115708062	115724553	115700794
115714712		115715676	115699594	115698662	115702372
115714731		115699461	115695787	115712644	115700765
115707374		115703114	115700482	115710887	115707142
115720620		115705224	115698791	115697904	115716353
115698497		115715873	115698304	115699151	115716208
115718049		115705339	115723735	115697008	115718564
115708666		115707278	115700902	115695722	115707286
115715333		115716440	115699619	115718550	115722786
115718695		115708041	115708724	115709642	115697324
115701069		115720722	115722334	115712335	115725094
115722213		115702328	115722209	115724778	115707738
115713325		115702344	115723121	115721141	115700744
115714574		115708263	115709903	115710207	115697867
115714895		115705027	115722340	115716225	115723128
115716814		115699726	115716111	115720160	115708685
115702733		115724426	115699356	115712124	115700590
115712352		115709041	115714238	115699679	115714340
115708804		115705705	115722212	115722896	115724610
115725400		115714304	115722233	115695661	115715207
115724574		115712470	115695698	115716920	115717359
115706808		115716959	115697316	115724798	115710643
115722440		115706434	115722383	115724531	115713406
115725399		115714495	115715243	115714513	115712969
115708875		115722892	115705232	115700952	115703484
115707287		115701577	115714957	115699514	115697222
115713000		115700762	115716690	115712813	115714122
115701093		115712545	115694731	115699273	115714167
115722856		115696989	115711262	115714900	115701414
115717276		115710240	115722643	115718829	115721231
115702309		115709683	115725090	115702381	115724474
115709974		115707404	115700821	115699702	115721126
115711523		115702338	115712577	115722782	115702815
115700898		115715651	115712832	115703417	115701809
115724136		115704458	115714909	115719259	115723417
115705624		115716763	115704238	115722797	115707644
115709424		115697557	115706418	115721202	115698108
115697720		115718146	115707631	115715589	115724840
115715029		115703131	115707950	27215490	115694735
115708017		115719271	115708217	115707920	115722491
115714202		115706439	115718143	115724068	115711535
115714299		115709080	115721939	115719032	115706755
115714645		115721056	115724103	115719860	115722270
115715752		115716364	115719238	115719603	115699650
115719066		115705500	115697008	115716186	115724871
115698236		115699676	115718550	115704949	115712709
115698848		115715627	115710167	115706211	115719488
115709888		115721401	115715227	115707156	115700538
115710511		115723407	115709642	115720529	115703002
115709862		115716748	115712335	115705916	115707927
115725397		115696788	115724778	115714132	115698234
115706025		115709812	115700515	115713069	115700450
115714075		115722761	115711659	115698812	115713039
115725396		115705186	115724177	115701353	115697918
115702778		115716023	115721936	115716289	115716153
115714528		115712031	115715739	115700928	115712254
115701201		115699360	115710365	115706776	115707728
115699500		115706481	115716920	115723531	115715650
115710266		115715641	115704846	115708405	115705639
115717662		115721402	115712385	115705845	115699629
115708001		115701586	115711984	115706626	115712925
115715044		115702330	115707205	115702596	115724641
115715022		115715316	115709717	115720584	115700779
115724682		115705763	115721388	115706235	115706303
115724652		115711518	115699470	115701456	115722792
115721007		115705742	115701196	115718081	115718822
115722385		115716221	115705761	115706110	115707802
115709668		115702870	115719714	115713766	115712303
115725580		115720566	115702629	115710554	115702884
115712386		115698609	115694985	115699764	115697319
115699314		115714852	115698310	115714683	115718581
115703584		115720876	115707100	115711014	115701545
115714593		115707689	115718829	115725522	115705486
115716751		115708281	115705923	115722818	115721178
115720580		115715011	115715323	115708349	115706802
115700504		115725682	115709188	115705838	115715579
115714339		115702678	115721760	115720604	115709365
115724660		115703565	115707804	115719686	115706156
115714076		115722227	115702381	115725538	115712789
115716463		115699178	115699702	115707307	115711565
115714078		115723389	115720097	115695670	115722455
115697380		115714385	115723485	115712151	115706398
115715743		115722553	115722782	115707592	115706369
115721925		115699265	115719259	115697301	115712007
115707934		115715270	115722797	115709293	115696992
115695741		115714187	115714722	115697573	115723440
115721439		115701288	115702950	115713181	115698721
115724583		115707876	115703759	115709447	115713952
115699118		115714272	115713982	115714293	115712251
115722417		115719599	115699261	115712283	115706200
115723327		115697803	115716348	115702531	115712103
115707103		115714684	115706839	115712365	115697467
115705334		115714181	115706238	115714245	115702903
115704913		115709358	115706130	115701158	115715161
115718744		115715257	115719463	115725560	115716712
115696981		115722189	115698256	115713651	115704897
115711944		115697737	115719603	115719016	115694727
115714282		115723976	115716186	115698152	115705220
115724640		115718636	115724949	115705728	115706754
115725041		115695640	115725376	115712240	115704012
115706175		115713922	115707220	115706122	115708897
115719393		115713781	115703083	115705039	115725651
115724432		115704823	115695797	115718981	115699386
115710251		115714873	115712005	115707481	115722501
115708153		115703161	115715662	115698515	115707772
115725291		115721935	115716927	115698690	115715203
115705239		115713078	115714132	115711977	115709937
115711646		115697726	115696838	115708908	115697477
115723075		115715656	115699218	115711860	115697780
115706483		115711613	115717404	115705787	115716292
115711929		115703922	115716289	115718688	115718534
115706132		115716525	115723358	115722011	115703163
115720678		115699757	115700928	115698620	115701236
115707494		115696863	115706911	115707298	115722157
115698030		115722741	115698878	115706247	115725551
115715749		115723019	115700866	115709153	115700466
115698589		115705621	115703118	115722973	115700300
115706187		115705686	115718461	115713472	115695655
115707106		115713724	115694737	115724974	115705236
115722415		115697926	115707810	115715684	115716055
115724451		115706497	115714116	115705267	115704298
115722414		115705672	115718889	115714217	115724944
115699054		115696971	115699301	115718516	115704303
115711381		115705673	115698941	115712198	115707452
115716945		115695627	115702382	115721712	115725462
115712735		115708790	115721188	115721937	115694676
115705261		115709413	115714366	115697539	115725787
115709592		115706666	115699909	115704769	115713788
115716673		115705519	115705295	115717368	115715313
115702964		115704824	115705925	115697353	115697211
115701151		115708984	115721273	115723435	115710285
115722370		115700348	115706036	115699406	115708766
115712828		115725449	115720971	115705158	115709429
115714504		115704068	115705678	115698516	115719040
115721850		115721847	115712937	115697847	115710965
115705374		115698801	115725300	115722121	115717164
115698764		115699751	115699320	115721701	115702780
115694711		115707582	115710355	115707633	115718928
115704708		115716643	115706821	115696898	115725411
115711996		115708510	115706356	115718403	115694744
115704807		115709967	115714367	115725304	115699401
115722790		115707942	115697260	115706587	115721180
115698585		115707741	115712342	115700623	115724470
115704832		115701215	115701319	115719290	115711136
115700704		115707707	115718495	115709345	115709910
115694739		115722444	115714683	115701356	115723432
115713030		115697569	115722530	115704384	115714489
115712842		115708105	115725655	115719260	115695726
115716979		115719351	115712867	115696215	115701361
115714604		115711506	115715692	115699332	115699672
115709566		115697189	115722078	115709691	115703528
115702797		115716725	115705234	115705000	115723263
115698840		115723362	115697778	115698803	115701466
115698651		115700896	115708847	115720696	115719149
115715183		115699990	115707973	115721929	115698859
115718530		115700697	115711453	115715726	115708727
115716054		115723433	115706370	115706240	115716609
115701266		115699851	115720604	115706831	115695688
115718723		115694861	115719686	115703902	115711560
115703590		115711631	115713791	115711580	115716432
115721431		115697308	115717347	115696407	115706596
115701469		115718911	115697301	115720632	115708295
115724189		115723011	115695795	115724575	115719246
115715120		115704169	115716260	115698252	115701571
115704163		115700848	115709009	115697997	115713329
115719105		115720743	115721211	115707048	115724972
115703914		115714189	115720846	115716842	115719559
115703615		115712843	115708084	115698227	115707288
115705237		115716868	115711635	115717136	115709818
115705219		115717366	115720660	115697492	115703129
115719466		115719261	115706071	115708895	115716874
115725572		115716022	115712365	115719489	115702804
115718398		115719138	115714819	115718592	115725742
115704819		115711414	115695566	115714742	115706824
115707305		115707240	115714245	115697676	115724557
115707446		115712299	115712505	115698161	115710289
115725571		115719524	115701158	115715721	115712273
115707393		115699457	115714772	115697894	115724915
115702452		115701249	115698152	115720644	115725694
115724701		115722763	115716527	115710758	115706001
115704873		115706496	115712240	115707763	115701777
115711400		115718476	115705753	115710927	115701045
115725626		115725652	115710202	115704694	115716613
115720672		115719253	115706122	115719550	115720755
115715119		115719514	115710174	115721195	115710781
115720710		115721225	115711530	115718631	115709808
115709321		115699266	115707209	115705895	115704903
115715096		115717013	115705039	115705864	115711484
115713183		115717421	115717046	115721022	115722246
115697879		115719301	115719696	115707098	115713858
115712943		115721304	115712444	115725339	115707278
115710333		115725606	115711977	115701027	115714990
115714793		115707740	115705444	115697240	115699726
115712996		115698575	115716706	115715886	115709041
115715242		115710389	115708908	115720968	115714304
115725222		115695695	115697798	115721282	115712470
115725099		115719169	115721934	115705115	115706266
115723213		115715748	115698285	115711641	115722134
115724684		115705596	115711317	115712608	115712067
115714849		115715194	115696554	115707081	115696989
115699596		115714600	115712999	115722473	115705321
115724784		115696801	115709153	115718681	115706228
115715885		115697404	115722973	115700669	115714057
115722464		115701285	115715971	115702552	115711988
115704432		115710629	115702990	115707291	115709028
115704480		115712478	115698169	115709308	115715319
115695352		115704249	115705267	115699605	115707860
115700539		115708695	115714217	115719391	115725316
115706913		115712139	115705067	115705819	115716452
115721032		115707077	115705443	115706044	115717339
115697853		115694690	115714814	115694805	115709080
115699153		115703576	115711993	115697924	115697703
115718900		115721916	115707162	115708110	115721056
115697525		115718791	115697171	115723034	115705500
115724637		115708497	115698219	27215498	115705773
115722336		115699645	115707726	115715608	115716748
115712107		115705598	115702620	115719380	115724577
115695882		115713035	115714464	115725359	115725117
115712997		115706592	115716749	115721596	115712031
115714631		115695799	115701871	115707665	115699360
115708148		115709411	115704104	115714992	115715641
115722094		115716737	115698016	115712893	115705166
115701582		115720966	115709311	115719376	115701586
115704175		115713990	115700446	115698595	115725546
115705341		115722136	115719396	115698715	115704611
115707489		115720646	115698802	115702705	115705635
115711970		115705994	115719371	115706123	115714385
115697791		115698174	115705158	115722557	115711840
115722411		115705459	115706933	115719020	115701115
115715720		115717087	115699729	115716599	115705368
115705365		115705138	115698289	115703829	115697737
115710062		115706752	115708207	115705093	115719537
115712099		115711241	115702972	115699864	115701503
115703053		115702857	115718470	115722353	115695640
115705362		115721176	115697461	115719173	115718396
115705351		115711459	115696959	115705984	115703161
115721954		115721166	115708277	115708776	115721935
115716530		115725305	115709190	115708265	115708706
115709204		115697864	115700485	115709238	115715656
115701287		115722569	115719046	115713783	115711613
115714862		115708615	115700390	115712569	115703922
115698904		115709276	115714552	115702712	115705285
115699742		115705125	115706844	115708345	115716509
115722728		115701208	115725304	115722318	115717254
115700841		115725420	115698723	115704853	115721284
115697782		115705582	115705749	27215452	115706666
115722342		115720835	115706587	115705429	115708984
115704023		115722804	115707825	115714563	115700348
115701510		115713909	115711674	115705530	115706408
115719357		115708024	115707732	115709984	115719395
115698747		115721985	115714099	115698183	115708105
115725234		115695886	115725407	115707097	115699539
115716207		115698597	115696217	115706883	115716725
115697527		115707725	115721324	115703558	115723433
115716021		115706627	115706861	115704733	115699246
115707816		115718703	115711940	115695987	115711631
115722002		115717102	115709345	115711473	115697308
115698839		115707753	115709418	115705268	115721314
115709095		115697881	115712414	115717608	115720743
115723328		115712227	115719070	115715577	115714189
115707723		115718950	115716563	115714408	115716868
115704034		115718955	115709180	115699476	115715258
115720798		115709811	115707397	115707495	115719524
115707673		115700458	115704343	115707781	115709261
115698725		115699614	115716678	115715756	115722350
115722828		115699133	115705924	115724597	115706908
115700857		115699418	115712056	115721399	115699266
115723210		115715805	115716168	115702983	115715843
115698667		115722443	115712631	115709692	115706638
115695960		115705878	115701548	115724544	115711256
115700519		115721750	115704287	115724842	115697404
115709102		115710290	115721929	27215449	115701285
115706565		115710316	115725464	115724510	115708695
115712066		115717146	115701340	115714975	115707077
115724858		115712642	115716438	115711101	115695945
115699056		115712101	115701382	115720801	115702645
115704883		115711438	115706875	115700948	115703728
115712815		115702730	115706240	115697036	115713035
115697437		115712125	115710258	115724468	115717010
115704912		115703582	115714468	115719856	115698174
115700791		115714511	115698807	115703418	115698194
115704213		115716653	115711580	115702773	115712982
115723352		115706227	115706403	115724955	115725305
115719355		115694730	115715730	115703099	115709276
115699115		115706645	115707309	115715125	115725600
115710255		115712853	115698252	115704713	115725294
115724785		115699554	115705533	115711545	115699138
115724124		115699417	115706590	115719700	115703578
115704901		115697869	115701279	115699479	115716981
115716621		115725406	115708858	115702659	115705878
115716704		115721873	115719611	115722812	115710290
115704955		115709531	115698126	115725336	115712642
115720654		115716837	115707715	115698203	115699554
115702647		115697797	115698602	115722602	115714908
115722798		115697928	115703588	115711003	115718172
115703128		115716439	115719457	115709154	115704842
115706296		115701518	115705805	115708137	115725567
115724097		115721003	115712337	115704436	115702886
115709409		115709778	115716074	115718012	115720690
115707959		115723628	115711324	115698090	115710932
115705366		115706753	115702654	115715253	115712677
115718489		115718172	115705905	115714204	115717311
115711420		115707628	115705739	115710238	115699597
115704484		115723040	115719506	115715690	115706619
115705372		115714497	115708188	115710119	115708047
115724789		115722384	115710748	115709438	115716797
115715245		115713839	115709694	115720940	115722773
115701200		115697399	115708895	115725403	115714934
115719454		115715932	115718592	115725515	115695879
115698708		115697112	115704082	115722548	115724919
115697766		115718648	115709356	115711333	115716978
115698306		115695724	115703145	115718157
115721013		115710932	115707260	115708085
115709017		115725308	115713417	115708662
115724765		115707417	115697894	115722933
115721335		115724507	115720644	115724600
115725242		115700691	115716676	115705364
115697788		115720784	115724566	115703825
115711949		115717089	115708754	115714276
115707450		115717065	115718746	115704921
115712567		115708175	115721073	115705794
115711672		115713070	115710927	115714706
115715672		115706642	115715269	115697931
115704886		115714644	115704694	115715629
115715653		115698873	115721195	115700834
115714751		115721297	115695796	115714007
115713814		115719712	115701104	115721410
115701321		115721277	115709201	115723136
115724863		115702892	115707098	115715094
115715087		115698206	115712503	115707149
115715261		115699597	115707121	115703142
115699758		115710913	115715972	115701742
115717106		115705704	115703148	115702978
115722717		115699335	115699756	115723143
115705342		115707252	115700383	115715031
115712051		115697543	115699168	115698925
115706050		115707114	115724489	115712585
115722436		115703842	115708296	115721389
115712346		115714156	115699198	115719139
115719764		115707691	115701027	115703127
115705363		115695664	115715155	115706113
115701442		115699321	115716173	115718813
115724786		115708047	115701293	115696833
115722876		115719252	115716921	115714240
115699750		115699622	115708721	115698184
115716382		115725089	115701109	115708653
115725160		115706084	115703006	115720790
115698889		115718881	115707213	115704683
115715728		115710405	115718756	115702858
115717416		115716797	115705382	115721377
115712331		115725389	115707081	115698192
115698982		115697546	115709646	115709002
115716965		115712235	115712799	115710045
115722862		115714934	115715069	115724890
115717409		115720676	115721321	115701240
115700302		115716615	115716226	115720469
115706994		115707886	115714739	115719013
115702619		115712868	115709066	115711942
115716296		115725528	115718944	115713481
115724626		115703930	115717296	115697856
115718407		115695879	115718681	115722538
115704043		115708511	115702552	115700667
115719768		115722971	115707291	115700361
115698218		115699715	115713917	115702351
115699318		115696238	115722641	115721074
115711933		115708335	115697973	115709950
115700950		115717228	115703172	115705894
115698280		115699519	115697236	115700652
115707208		115706285	115704556	115709916
115721774		115702879	115716406	115715240
115702429		115698275	115709843	115708303
115712507		115710423	115725051	115705620
115717750		115697621	115720642	115720959
115711665		115713390	115713617	115702947
115715278		115696885	115714274	115722528
115704761		115725667	115706044	115721802
115717529		115707259	115698760	115700356
115698164		115708924	115712482	115723311
115695417		115694766	115725421	115706035
115712354		115712241	115721191	115707993
115703628		115715296	115715608	115703106
115714024		115704997	115718931	115709583
115697373		115700814	115723279	27215478
115723493		115698500	115721775	115703797
115721249		115696236	115709178	115717098
115717444		115700557	115699620	115707250
115715264		115697884	115722307	115716278
115708305		115703620	115718711	115703621
115698819		115719564	115702722	115708241
115712328		115714886	115714781	115723106
115714928		115715710	115722639	115708650
115723414		115712710	115714162	115714891
115699267		115702965	115706173	115698018
115705795		115697238	115719376	115723179
115705565		115711366	115712984	115721055
115712357		115714688	115706008	115725442
115712211		115707822	115716710	115707321
115724607			115698595	115715105
115724673			115703500	115719855
115712145			115705272	115704045
115725323			115698066	115710302
115708898			115697964	115703143
115721346			115708231	115700460
115721924			115714123	115719399
115709205			115702705	115714978
115706749			115722645	115719547
115705087			115706916	115704322
115711304			115722557	115702579
115719478			115707864	115718961
115720662			115724139	115703936
115716040			115722164	115711390
115716038			115703829	115718298
115700499			115698190	115716365
115718261			115708229	115706387
115718443			115715831	115710072
115709902			115707998	115712724
115716998			115719623	115719543
115700585			115722276	115703995
115708933			115724927	115706108
115698546			115699790	115721290
115716863			115706380	115699857
115707299			115704648	115716937
115720900			115708265	115715881
115697005			115701182	115722566
115700613			115697272	115705212
115724434			115715138	115725467
115715820			115702712	115718161
115718473			115716652	115716302
115697741			115724907	115718286
115699079			115722275	115705436
115714568			115708345	115716392
115714186			115713943	115712763
115709786			115702866	115715635
115718038			115722746	115709844
115718477			115718493	115704192
115697859			115709383	115725610
115706695			115721036	115714941
115708081			115705933	115704752
115706351			115698549	115721806
115701299			115706947	115706251
115706407			115705796	115705992
115716230			115717447	115702364
115706622			115715596	115710644
115700508			115703436	115724484
115721766			115697813	115711957
115701428			115714257	27215450
115707091			115697473	115702940
115699160			115709984	115697346
115705114			115712059	115710110
115725654			115707097	115710234
115697499			115695983	115704983
115704594			115705757	115725298
115722580			115714320	115706668
115716265			115711473	115722963
115725665			115705268	115722036
115699297			115709010	115720113
115705851			115711930	115706685
115698237			115712231	115711627
115724154			115717608	115718764
115697284			115707009	115714305
115715766			115717303	115719422
115705282			115714559	115715666
115719077			115715577	115723033
115714623			115712727	115705921
115696902			115711182	115707480
115716202			115696996	115703014
115712163			115712668	115706578
115711699			115699654	115707482
115719745			115724804	115707638
115715337			115704558	115701259
115702656			115704664	115702340
115722351			115722829	115702904
115725620			115703073	115713020
115712791			115722518	115706012
115705574			115715756	115702725
115709206			115717348	115699452
115724458			115719492	115708256
115723950			115721399	115702848
115708723			115715182	115698816
115718193			115700554	115715251
115704851			115697831	115719280
115700070			115709554	115707611
115703155			115706536	115707543
115718880			115702002	115697498
115717307			115700645	115694903
115704676			115697036	115709983
115707224			115698561	115706437
115718808			115699589	115712786
115715681			115700576	115705643
115698813			115699609	115706817
115714496			115707679	115708806
115714104			115698855	115705740
115724111			115709179	115712025
115708343			115723623	115716955
115705791			115716665	115698502
115702915			115705578	115701355
115713792			115709733	115698222
115705762			115705503	115720769
115699173			115703099	115703054
115703682			115706267	27215464
115707182			115705194	115701295
115706225			115722448	115714588
115698303			115718742	115706670
115720616			115698618	115706226
115709568			115725585	115704810
115701397			115704713	115716206
115712924			115716293	115704542
115721872			115700474	115720563
115701448			115725568	115712993
115724059			115706382	115718770
115707221			115711457	115694781
115707369			115715736	115714144
115719000			115716454	115703012
115716229			115724466	115708477
115716622			115722221	115724857
115706271			115707115	115718998
115724681			115721529	115700731
115715645			115715660	115700278
115724745			115722550	115698499
115709667			115715276	115722631
115724844			115714956	115699086
115704358			115723026	115723275
115714539			115725336	115701174
115713067			115705417	115714982
115714171			115705430	115718574
115698626			115722523	115704738
115724733			115697553	115698540
115710226			115719708	115716046
115717403			115707914	115718693
115724653			115698498	115722749
115707401			115698637	115709949
115698312			115708137	115698870
115698033			115708228	115712071
115695924			115718659	27215456
115704720			115701538	115714514
115708244			115699730	115724105
115709441			115708331	115706280
115707630			115709341	115700637
115706835			115715284	115722008
115696510			115698090	115704811
115725780			115725135	115717412
115709471			115722598	115713064
115723376			115724627	115709845
115723381			115711255	115709242
115694767			115703953	115719654
115707897			115714602	115719538
115721157			115698696	115701533
115722822			115708029	115709511
115707780			115715690	115698145
115700465			115697250	115719849
115706494			115722438	115724934
115709596			115706487	115724672
115709619			115716809	115706257
115704933			115709438	115699196
115698258			115722764	115702724
115710061			115714048	115709448
115705038			115709193	115722142
115706421			115713842	115698470
115708155			115694855	115724885
115715330			115707479	115706579
115697808			115704825	115695941
115716754			115721700	115709480
115719565			115711689	115703221
115698911			115720940	115722303
115709461			115714393	115694796
115717375			115700363	115717287
115707884			115719747	115705835
115723006			115704692	115701413
115712477			115714117	115717344
115719667			115720934	115712761
115707962			115711333	115698918
115706886			115722638	115720756
115714466			115725168	115719415
115716407			115702342	115724869
115715585			115705483	115720647
115720543			115708085	115703311
115705733			115711343	115704497
115706345			115708662	115704709
115705527			115709181	115720124
115704790			115705577	115724449
115713887			115721205	115717148
115718332			115722933	115721315
115702726			115705364	115716832
115708719			115699352	115695174
115709313			115716085	115717939
115716825			115718615	115700981
115723032			115714545	115708710
115715133			115714919	115718726
115710195			115703825	115718447
115723489			115701550	115698808
115714434			115714276	115699794
115715335			115707991	115717281
115724767			115711655	115700768
115718594			115707400	115700918
115712395			115695227	115697041
115713079			115718116	115706677
115701222			115699674	115705716
115706775			115725354	115710247
115717012			115716224	115706061
115713923			115710014	27215502
115716337			115698957	115702487
115724118			115714007	115712787
115715751			115706096	115724166
115714347			115723171	115701153
115699485			115705715	115712658
115695654			115715043	115717256
115701393			115712864	115709704
115722495			115711637	115699477
115711998			115718638	115720582
115723258			115701507	115719895
115699402			115715870	115709548
115695894			115697812	115721917
115710152			115694804	115705610
115709006			115712094	115699137
115725545			115703142	115722326
115699181			115715786	115705304
115700724			115721732	115719195
115704317			115716570	115708034
115702801			115724061	115716923
115720645			115714037	115711738
115714338			115702978	115719493
115705455			115723408	115723455
115708103			115710609	115719187
115725167			115708833	115704329
115705703			115725134	115709725
115723312			115711421	115712690
115707982			115715031	115698019
115710084			115705481	115721103
115717378			115698925	115694699
115714882			115717827	115708359
115699046			115721868	115709419
115714064			115705802	115706473
115697128			115725513	115699610
115699125			115721389	115701186
115716326			115721889	115718479
115705843			115723021	115708866
115702746			115716711	27215451
115712114			115713037	115705061
115698313			115702599	115712910
115715005			115709191	115704764
115718518			115703342	115718902
115695754			115706562	115712837
115724186			115712673	115700908
115702625			115709995	115701509
115718668			115715776	115711109
115698132			115705702	115710189
115707243			115719426	115719120
115714658			115707119	115702806
115699555			115714441	115707212
115705273			115699126	115702847
115699504			115696833	115722494
115710015			115706213	115707332
115704951			115707941	115723397
115701166			115698513	115725335
115700720			115709962	115709813
115711171			115714474	115716727
115708332			115706906	115722317
115707516			115708087	115706966
115709235			115702836	27215495
115708172			115699625	115698864
115707496			115722395	115707688
115702448			115721020	115698168
115711588			115705571	115707770
115705642			115699268	115721325
115719323			115705831	115706377
115696250			115704947	115722927
115708280			115714149	115706409
115703651			115704008	115725492
115715106			115719508	115716875
115714877			115699307	115699613
115719770			115705302	115724546
115723607			115699466	115714988
115724901			115700715	27215463
115700658			115719848	115715098
115708941			115723038	115711973
115704533			115719435	115700518
115699482			115721377	115708473
115701378			115723060	115715032
115722722			115709002	115698955
115702776			115705405	115703600
115698223			115697935	115706455
115715250			115709985	115722093
115707999			115699651	115705879
115707511			115695858	115720706
115714491			115703158	115699407
115705117			115722851	115714883
115717451			115719141	115698770
115712575			115697902	115704016
115712355			115700536	115707460
115703819			115699111	115714259
115704097			115711942	115711571
115719443			115715848	115697396
115711969			115712194	115701574
115703666			115700456	115709625
115700727			115719118	115700493
115704874			115700943	115700309
115722006			115703243	115715093
115719660			115716443	115701044
115711679			115703157	115722198
115699930			115715897	115706568
115710269			115700953	115714665
115722051			115715024	115707661
115718412			115697888	115712788
115712349			115722180	115722327
115722745			115700667	115701278
115715233			115704583	115698538
115699646			115709325	115712930
115719608			115714168	115706765
115725260			115697490	115707635
115717301			115703119	115719002
115705861			115700980	115722304
115724605			115703705	115706166
115702336			115699313	115722559
115702783			115706744	115716141
115711173			115714256	115706331
115698272			115708075	115719515
115721232			115714638	115712610
115701364			115719273	115698784
115697266			115702351	115723468
115712201			115702641	115722899
115722399			115700160	115711722
115697485			115701945	115720956
115720669			115724509	115719981
115703972			115721074	115722905
115711163			115702376	115714447
115704624			115719681	115721433
115717280			115708759	115704102
115718449			115722037	115718860
115700940			115721286	115702393
115713934			115705231	115715601
115699594			115716594	115709489
115712973			115697377	115710054
115695715			115698975	115696874
115725262			115700632	115719505
115701521			115722878	115712798
115698791			115721107	115716475
115716547			115706343	115717108
115717230			115722705	115725351
115719026			115706801	115713575
115704735			115708303	115701718
115710077			115703704	115707459
115721023			115715122	115715117
115709956			115701544	115695874
115705277			115715163	115707329
115694841			115716785	115709672
115709903			115713177	115709500
115696814			115701438	115718803
115722340			115707617	115722237
115701467			115719416	115694697
115725510			115706039	115704571
115722233			115714286	115705260
115706425			115716059	115698125
115709258			115702947	115719602
115714030			115721042	115712646
115715243			115712277	115710860
115706572			115699598	115722893
115712964			115718624	115709772
115725090			115697149	115707974
115722324			115703120	115712118
115712832			115715610	115711537
115714909			115703117	115707072
115715755			115716036	115721995
115706418			115723130	115699495
115697962			115703598	115715083
115719031			115707637	115704166
115700592			115703106	115695692
115707950			115709745	115711413
115719029			115714998	115700666
115721939			115708850	115722352
115724103			115703797	115712977
115719238			115717098	115718543
115725159			115716311	115723035
115702031			115716745	115695675
115714811			115703621	115697535
115709961			115720962	115703144
115715227			115703726	115706853
115716635			115723106	115714232
115724177			115701661	27215448
115699421			115709595	115709883
115705769			115698231	115719632
115712264			115700776	115706799
115708056			115702855	115708474
115724543			115714891	115716669
115712385			115705671	115709219
115711984			115694831	115708821
115725592			115710955	115715063
115714949			115704775	115724908
115716415			115716273	115698919
115723670			115711372	115715863
115705761			115719406	115721158
115710707			115702716	115705755
115700713			115697732	115698745
115696768			115718005	115704712
115700540			115716872	115719664
115715323			115716834	115707966
115718205			115723163	115720913
115706097			115707171	115722265
115710085			115722919	115719075
115718852			115700803	115708139
115704843			115694833	115710792
115698281			115707179	115699581
115713982			115697465	115714029
115703721			115716205	115725564
115714744			115724538	115710282
115700956			115713060	115720723
115706147			115707312	115707643
115720542			115706672	115723701
115705513			115706205	115699458
115697474			115700460	115705568
115725121			115719399	115724025
115707713			115725732	115700521
115705759			115720619	115707051
115724949			115701362	115705534
115703222			115705498	115706216
115707857			115712670	115706241
115721984			115718888	115713992
115695797			115701328	115715948
115718971			115699755	115702851
115715662			115705936	115714011
115718879			115720116	115707275
115719296			115704322	115709109
115715152			115712615	115712696
115706103			115716867	115705108
115698960			115709879	115724207
115721452			115706255	115700520
115696838			115697774	115725116
115699218			115723395	115697777
115717404			115708226	115708165
115705057			115707050	115716248
115698878			115698489	115697832
115707664			115697524	115721422
115712542			115709743	115716516
115717373			115716958	115702986
115697470			115716864	115712419
115708859			115713967	115705003
115694737			115706277	115701580
115707810			115706041	115721771
115725202			115714172	115724585
115719460			115720729	115716377
115721188			115713968	115715621
115700796			115718180	115713429
115708878			115714152	115715753
115714366			115724085	115701110
115714327			115703052	115709374
115720965			115715139	115714067
115723758			115705141	115713937
115699909			115702721	115707160
115698319			115707789	115701385
115721273			115699113	115706139
115706036			115721290	115716467
115702831			115718463	115704050
115720971			115707575	115713493
115706781			115698242	115722733
115705678			115703544	115695739
115708240			115716301	115697462
115700851			115713991	115700662
115705360			115694684	115715622
115718448			115722566	115707734
115714367			115725171	115695885
115720607			115713556	115722743
115706204			115725467	115709769
115718606			115696904	27215479
115717372			115699720	115707405
115718801			115721843	115724461
115724195			115710791	115723240
115722530			115714268	115722328
115712867			115712763	115705241
115697242			115702409	115712877
115707758			115698739	115725541
115722345			115714002	115700212
115705437			115708862	115699387
115708847			115708733	115706361
115711453			115698142	115697055
115724913			115712721	115698245
115706370			115704192	115708013
115711493			115696839	115694678
115713791			115709580	115707863
115715034			115697992	115706855
115698937			115722200	115714314
115698339			115721051	115707695
115721211			115709905	115709608
115720846			115699114	115704884
115700690			115714941	115724573
115717019			115700882	115706938
115706071			115720765	115715809
115716086			115702472	115704207
115713902			115699252	115716263
115712505			115704752	115709263
115705674			115723415	115723272
115720792			115714659	115695748
115717090			115708261	115714110
115716527			115718402	115704671
115710174			115707591	115705392
115721697			115702021	115711424
115707094			115698743	115706796
115725726			115702364	115707697
115716791			115707447	115706064
115723169			115695919	115718167
115701537			115701406	115709186
115717046			115694808	115697397
115703748			115720623	115703220
115714641			115708065	115710024
115708315			115712512	115702551
115705444			115715012	115713622
115721934			115706474	115707967
115698285			115710644	115719577
115708004			115703577	115718865
115701325			115716290	115718462
115696554			115708100	115718467
115698496			115703137	115722517
115716942			115696881	115716058
115712999			115704122	115701587
115702825			115712847	115704747
115722979			115711957	115697186
115712625			115709253	115705567
115702990			115700605	115704150
115698169			115716933	115706124
115705443			115708803	115711233
115719482			115722744	115707683
115709999			115705615	115715116
115700608			115701761	115706056
115698016			115718709	115695759
115709311			115723020	115713993
115703181			115713008	115704943
115718571			115713956	115708012
115698289			115722935	115722806
115702434			115699357	115695826
115714258			115722928	115713003
115708207			115698131	115715275
115718470			115702910	115705448
115696959			115714740	115708138
115708277			115715639	115725548
115714138			115707809	115709537
115700390			115722439	115707037
115706016			115725298	115721059
115714552			115709741	115704868
115707710			115705633	115703212
115712428			115716245	115711364
115725465			115705595	115723410
115706518			115714773	115714206
115707732			115716318	115721296
115714099			115706668	115723220
115721000			115722509	115699541
115718789			115712379	115706390
115721324			115722963	115717083
115723248			115705520	115716776
115725269			115722036	115697795
115718913			115697942	115710575
115706384			115709696	115721801
115706861			115698047	115697646
115711195			115710221	115712851
115709418			115702657	115725193
115695916			115702640	115710470
115712414			115704349	115711127
115723768			115705249	115705522
115705924			115721312	115723149
115696764			115695927	115708682
115716168			115721057	115706436
115712631			115699600	115704503
115701548			115714158	115714737
115722898			115712405	115715767
115708488			115705599	115715581
115705841			115701492	115697040
115705533			115705024	115715778
115719014			115700516	115703602
115715086			115695203	115701726
115708858			115712839	115722208
115708982			115719422	115722500
115698602			115700577	115706224
115705805			115694740	115709634
115709405			115702010	115707352
115699630			115696243	115722579
115711324			115699405	115718569
115700571			115707017	115714184
115721781			115712998	115698991
115725459			115707223	115704757
115706183			115724495	115724565
115710712			115708141	115722184
115704082			115709397	115697094
115707260			115714192	115706955
115705269			115723033	115712703
115716676			115714557	115712033
115696844			115708990	115705133
115719192			115723913	115705049
115718746			115705921	115711623
115721073			115706743	115707345
115723444			115720730	115703187
115718154			115705644	115725068
115704793			115707533	115696962
115697875			115706346	115711549
115696249			115712374	115717240
115698587			115699511	115704870
115723107			115706212	115705900
115700655			115703572	115706893
115715764			115706578	115705847
115695796			115700447	115716091
115705816			115699319	115721132
115709201			115707638	115719736
115704291			115705558	115716006
115705070			115712766	115722589
115712592			115725669	115721353
115715972			115709821	115695920
115705767			115713020	115700582
115703148			115722288	115710988
115699756			115720474	115705209
115700383			115694753	115707044
115699168			115720593	115701446
115724489			115705307	115705664
115699198			115718787	115719901
115716294			115701122	115719858
115698271			115699452	115718905
115707148			115724586	115716889
115721093			115707872	115705928
115699664			115700921	115708961
115704572			115719086	115722723
115698811			115708256	115717334
115723694			115702848	115699771
115721941			115720606	115714966
115708019			115702771	115701739
115718756			115707078	115710046
115711038			115698816	115705371
115708997			115717597	115711632
115712423			115698001	115706364
115716226			115702932	115706430
115719394			115708654	115695707
115709066			115698945	115714380
115706629			115710070	115721810
115721153			115699049	115724719
115701892			115717200	115721351
115699593			115715077	115700872
115703191			115700358	115710327
115714354			115716388	115705942
115704739			115712112	115708703
115696549			115699100	115696855
115716384			115707641	115716073
115718700			115705162	115704030
115707483			115707611	115697415
115708279			115709324	115697267
115721400			115708071	115721134
115714308			115707543	115724926
115706373			115698013	115705822
115722091			115710199	115705855
115721775			115717438	115715338
115707361			115697507	115714870
115706008			115702925	115697395
115716710			115722770	115701391
115695653			115695936	115712804
115698190			115722244	115721689
115718165			115699091	115722970
115722795			115697199	115712971
115707660			115719751	115716182
115719623			115710329	115702916
115722276			115704435	115711591
115706380			115712829	115720609
115703847			115697289	115705143
115697272			115716138	115705071
115705379			115714214	115719230
115708958			115714794	115707510
115702557			115721751	115709800
115714083			115711246	115718926
115704365			115698765	115710352
115705694			115697006	115704794
115702994			115712786	115712008
115714032			115720964	115696935
115702238			115700659	115707139
115702866			115721331	115710836
115718493			115699736	115721268
115707323			115705324	115714395
115713190			115712135	115724958
115698549			115697476	115710259
115703436			115709928	115722190
115697813			115711134	115715828
115717433			115697322	115704723
115714257			115702889	115705601
115705708			115710173	115719593
115712059			115719317	115709614
115695983			115711295	115718602
115705757			115703138	115697340
115695950			115711495	115699298
115714320			115696893	115696919
115711930			115707052	115712797
115712231			115708806	115707073
115695869			115710087	115715998
115705096			115724883	115697078
115696996			115718427	115721996
115699607			115712662	115708184
115706715			115720754	115715922
115704664			115694784	115721213
115712726			115699748	115703857
115722518			115700619	115715966
115722489			115723341	115702313
115717348			115700786	115708142
115720999			115708180	115702397
115697831			115725595	115700444
115717043			115716955	115700781
115724503			115723293	115721785
115702002			115706018	115695534
115695729			115699656	115725433
115705346			115718859	115725054
115699589			115697456	115714997
115707744			115702938	115714043
115698855			115714869	115719548
115708021			115714421	115716399
115705578			115699567	115718471
115703027			115701546	115724453
115714234			115712524
115725585			115715327
115706851			115714307
115717511			115714588
115700529			115706670
115723430			115698000
115724598			115725478
115724466			115707762
115722550			115716581
115704637			115700879
115721381			115701100
115713486			115704542
115721429			115723225
115717291			115701006
115705839			115718973
115701581			115711924
115708985			115697883
115697029			115706121
115701538			115701452
115707905			115700895
115712084			115695657
115712367			115707123
115708249			115697104
115703018			115699369
115703953			115706943
115714602			115707147
115719223			115717111
115706388			115712510
115705470			115699492
115719439			115697090
115697250			115723401
115707266			115704864
115714048			115704651
115707333			115699996
115711689			115720881
115721234			115711921
115700363			115697692
115724444			115702743
115719747			115704141
115714108			115703012
115698594			115711259
115697374			115699142
115709468			115703076
115705246			115720574
115725168			115709467
115702974			115715584
115717052			115710561
115704871			115706499
115725101			115716145
115725776			115718978
115715160			115701693
115718615			115719249
115701550			115701513
115717380			115699642
115697095			115700278
115721913			115714225
115696573			115709569
115708203			115716931
115718116			115707787
115716881			115703183
115719476			115707432
115723171			115698214
115716792			115698499
115704285			115718882
115717045			115706746
115712864			115697540
115708923			115704991
115721732			115701470
115716570			115719676
115717172			115723084
115697423			115720667
115700612			115712992
115705569			115708871
115708833			115710531
115699544			115723305
115699003			115699403
115702960			115704344
115712416			115709629
115721889			115695466
115723021			115709783
115706562			115716786
115723366			115703836
115697159			115716046
115715776			115707526
115706324			115714775
115707360			115710284
115707812			115698269
115717418			115718693
115725013			115714135
115703720			115708718
115706476			115714980
115714193			115704144
115711950			115716597
115718507			115712979
115700826			115706359
115701529			115706632
115722080			115711678
115723187			115722251
115717326			115723383
115699172			115715262
115723023			115707547
115707075			115714526
115716323			115703037
115697935			115712304
115718761			115714163
115712194			115698870
115710038			115719679
115702037			115715143
115717387			115712071
115700943			115720264
115724676			115707271
115697711			115714942
115716443			115702829
115707429			115721318
115703710			115707607
115705836			115711011
115704583			115709322
115702845			115711681
115697490			115724105
115708170			115706812
115706065			115704673
115712633			115725349
115719156			115716360
115705231			115713438
115701386			115701233
115716594			115721704
115697377			115697032
115697710			115700637
115700632			115697652
115711486			115720976
115703704			115714241
115715122			115722008
115706217			115722831
115713177			115723343
115725747			115704581
115719419			115698198
115716059			115706874
115721042			115704811
115723261			115710306
115718624			115717412
115712019			115704705
115707340			115712330
115716036			115716121
115700925			115722084
115701194			115716351
115719181			115714888
115697351			115699568
115708850			115713740
115716745			115719654
115712442			115717086
115714262			115716918
115703726			115717066
115712810			115695704
115705828			115711352
115710955			115706682
115707874			115719574
115697732			115697610
115700803			115712944
115724674			115716422
115705343			115714986
115712882			115698049
115724538			115718520
115717059			115713942
115697802			115708936
115709113			115701541
115716102			115719849
115713370			115715211
115714675			115706598
115701328			115706451
115724441			115707837
115707805			115701137
115708749			115707353
115722469			115724448
115721344			115701323
115723395			115706257
115708226			115712155
115699599			115712975
115709743			115725639
115713967			115719643
115706277			115706419
115715674			115707567
115718537			115698861
115707575			115725385
115704774			115716844
115718159			115706896
115695925			115712778
115725171			115696288
115718641			115722552
115716172			115701409
115721843			115722127
115695184			115709448
115708862			115707537
115707546			115725699
115712721			115714219
115712153			115716551
115723087			115703241
115707488			115714316
115701023			115722815
115699114			115706579
115698907			115718940
115697142			115699427
115711964			115703039
115706438			115695941
115717290			115697214
115722252			115709946
115723415			115714415
115703208			115725724
115697667			115699768
115708261			115722303
115707591			115703058
115698743			115697913
115715670			115717645
115725484			115694796
115695919			115695850
115708065			115717287
115697984			115709894
115701486			115710153
115708100			115715220
115703137			115722716
115725296			115702569
[truncated: 871 more rows]
