# Supplementary material for: Genome-wide identification of cannabinoid biosynthesis genes in non-drug type Cannabis (Cannabis sativa L.) cultivar
Source: J Cannabis Res. 2024 Sep 7;6:35. doi: 10.1186/s42238-024-00246-8 (PMC11380790; doi:10.1186/s42238-024-00246-8)
Supplement: Supplementary file 3 — Supplementary Material 3: Supplementary Table S3. Average FPKM of genes identified in each gene cluster. [file 42238_2024_246_MOESM3_ESM.xlsx]

## Sheet: Sheet1
Cluster 1	Flower AVG	Leaf AVG	Stem AVG		Cluster 2	Flower AVG	Leaf AVG	Stem AVG		Cluster 3	Flower AVG	Leaf AVG	Stem AVG		Cluster 4	Flower AVG	Leaf AVG	Stem AVG		Cluster 5	Flower AVG	Leaf AVG	Stem AVG		Cluster 6	Flower AVG	Leaf AVG	Stem AVG
115694820	45.5699	35.6041	4.95905		115695971	0.533728	2.47675	0.092248		115700759	1.99389	29.0719	11.2953		115695891	4.62497	30.0628	56.3871		115695227	4.05835	0.537603	2.2212		115694737	7.6874	0.216773	1.47912
115695667	69.0418	73.4867	16.4951		115697918	10.806	46.524	3.42146		115714383	2.07973	16.7803	9.11587		115695892	0.124136	0.102857	1.86576		115695466	22.6666	7.32512	20.6861		115695852	5.36128	3.12802	0.788897
115695688	11.0035	11.121	4.25949		115698194	96.2388	134.194	45.7862		115714959	1.26112	12.0437	11.0079		115700445	88.6729	0.144965	804.046		115698247	3.73164	0.212818	1.73536		115696510	5.20711	0.740754	0.632635
115695726	0.882359	0.951764	0.0103613		115699539	4.23991	5.53463	1.91572		115716536	0.819725	2.04424	2.93982		115702524	0.034523	0.001	4.0386		115700921	5.23209	1.13495	3.49513		115697128	1.6004	0.001	0.230336
115695781	2.37203	1.44128	0.021824		115700348	23.3177	129.532	10.4221		115717016	29.2845	1035.64	787.387		115704442	0.142367	0.103008	1.62976		115701138	7.54091	3.05165	7.32043		115697232	213.771	0.329247	2.12516
115695784	2.78241	1.95618	0.0453527		115700867	81.4283	1151.22	43.0649		115718144	1.39971	4.51968	5.05116		115705093	1.0618	1.72522	4.21338		115702587	1.65703	0.191714	0.981684		115697909	6.21285	0.10705	0.0489173
115695828	23.035	22.8292	4.39405		115708094	0.666301	2.3031	0.0254057		115719513	36.0862	252.933	388.712		115705349	7.61857	0.232798	10.1982		115716834	1.86303	0.001	1.53097		115699181	2.96055	0.052012	0.411249
115695895	69.8794	65.7488	10.9504		115709080	19.5179	84.1543	8.16082		115720196	0.808573	6.44068	6.28004		115705601	10.9686	9.69582	22.3858		115719969	1.29817	0.001	0.515594		115701261	5.1994	0.202929	0.001
115695939	99.9482	85.061	15.2981		115716153	2.57639	3.56231	0.819036		115694719	0.0538367	3.67881	4.18728		115705794	6.1087	10.0127	21.646		115720088	0.827855	0.089035	0.98643		115701495	24.0516	5.86043	8.23684
115695959	19.6812	17.2145	4.10882		115718890	0.001	1.06412	0.210034		115694757	0.554412	2.09421	1.88424		115706859	0.001	0.194445	3.71683		115720976	4.00077	0.92823	2.55972		115702426	2.84222	0.001	0.070074
115696979	8.48654	8.3557	1.68497		115719524	4.59092	34.8999	2.10029		115694846	10.549	84.118	77.8339		115707354	969.535	61.6082	1646.04		115722632	6.29659	2.54433	6.40042		115702505	2.90511	0.001	0.078159
115696993	9169.63	10104.2	1220.99		115719525	33.3659	62.5816	6.91235		115695048	1.2304	4.66837	3.71886		115708110	4.99138	7.14355	20.3141		115724132	7.7903	1.79684	4.116		115702557	2.55564	0.001	0.001
115697500	7.12066	6.65475	0.289317		115725308	25.2905	53.3785	22.5839		115695604	2.02732	12.7858	10.5901		115708241	1.01378	1.08014	3.33528		115724586	1.12781	0.404016	1.24297		115702653	11.7561	1.01312	0.0263073
115697658	3.86157	3.64161	0.441169		115694676	53.7864	820.257	19.952		115695627	9.68231	47.1063	22.8516		115710057	0.197614	0.0782533	6.29965		115725501	3.12318	0.183835	1.4737		115703581	25.4788	0.001	0.007084
115697673	152.371	148.938	37.9261		115694690	21.3813	62.645	22.7976		115695708	2.66238	12.5383	20.579		115710117	0.616711	0.444886	4.49595		115725655	7.18498	0.562556	4.32909		115706066	10.8991	4.13178	5.32074
115697759	13.8212	12.0916	3.40222		115694727	1.08567	2.67054	0.37611		115695842	2.50301	10.4604	7.26788		115712757	0.383329	0.851217	2.88237		115694687	1.77971	0.854105	1.94189		115706407	5.5531	0.001	0.559009
115697761	29.9446	26.9035	4.5521		115694730	8.2399	38.0789	15.3966		115695831	6.67511	23.3008	17.0559		115713059	2.33635	45.0555	126.902		115694722	11.91	5.65782	12.5823		115706427	14.1885	6.05827	6.76528
115697867	37.9734	33.4664	11.182		115694744	25.1622	111.524	9.4596		115695867	1.58334	4.86583	6.6758		115713429	2.22397	1.02237	5.17394		115694747	12.9375	5.38224	10.968		115707531	10.9577	0.001	0.001
115697885	71.236	50.8067	1.18859		115694766	9.07078	34.6491	16.8182		115695943	55.4217	138.319	129.817		115713481	0.714905	0.609844	2.43393		115694761	29.1386	7.43845	17.2284		115707591	50.4884	2.23358	15.8455
115698181	374.092	354.348	71.522		115694770	900.845	1871.37	120.887		115695990	2.7063	23.513	20.7145		115714676	0.394862	0.227567	4.01117		115694773	3.81738	0.120827	3.7259		115707934	453.399	37.3273	20.7233
115698322	127.86	99.3518	13.1923		115694830	0.0765597	1.91681	0.02236		115696759	0.211753	2.65638	1.54333		115715761	0.682374	0.071726	1.14476		115694784	145.993	28.3636	84.6894		115708791	857.382	0.001	11.6351
115698573	12.5774	8.69344	0.69057		115694861	10.051	25.772	8.66331		115696836	2.79431	18.7232	25.882		115716599	0.693834	0.37556	2.75314		115694791	70.7486	27.6863	69.5696		115708892	2.63596	1.2881	0.944057
115698627	18.5638	20.1769	1.71776		115694953	11.2083	80.7915	14.8058		115696842	13.4863	72.4036	91.4707		115717281	0.001	0.001	2.33727		115694801	38.4305	0.200853	22.7836		115709065	5.02097	0.001	0.001
115698645	3.73708	3.44625	0.122052		115695326	0.197839	0.993763	0.001		115696878	4.73627	15.1993	10.7537		115718081	0.516888	0.180935	2.59612		115694808	1.68626	0.001	1.4224		115709849	140.41	44.8569	4.01767
115698700	26.8107	23.5918	2.96484		115695418	0.451151	7.28337	1.2301		115696913	1.19768	2.4763	2.89532		115718089	0.215766	0.001	1.62644		115694831	3.51086	0.558627	1.99079		115709850	349.165	0.001	1.01727
115699121	45.6118	36.7137	11.1767		115695287	8.61592	52.2711	10.6994		115696999	0.279425	3.49973	1.90829		115718155	0.430588	0.001	38.4524		115694855	26.0262	5.13703	21.9489		115709853	512.813	0.001	0.945908
115699288	3.11087	2.95986	0.406763		115695556	0.039984	1.83798	0.0847293		115697025	3.78876	9.0537	10.3067		115720793	3.10315	7.22051	26.462		115695436	27.9313	8.68069	19.1086		115713065	6.84338	3.30309	2.83855
115699383	24.7539	23.1121	5.83778		115695574	0.001	1.2712	0.001		115697164	3.71845	11.7843	18.0061		115720959	32.5413	32.612	108.917		115695650	2.75327	0.001	1.09323		115713862	779.077	0.001	0.0635043
115699415	8.66311	7.97756	2.38804		115695587	0.488236	4.89183	0.555162		115697338	8.72484	23.4483	22.1676		115722579	5.6957	0.848091	12.2833		115695657	12.0229	2.16932	6.31036		115713864	107.993	0.001	0.016654
115699460	132.377	100.132	27.7852		115695640	5.10075	16.9041	2.22373		115697367	7.05825	14.7937	15.1921		115722749	13.7617	14.7702	39.9512		115695683	43.9524	14.3181	30.2788		115717038	207.429	0.750172	0.0171893
115699462	7.11789	5.54267	1.45643		115695655	55.0626	150.054	19.9883		115697440	0.979106	5.50724	7.11728		115724025	1.42341	0.312962	3.38877		115695698	3.1681	0.311585	2.97093		115717039	264.136	1.42096	0.022879
115699532	38.1961	29.4239	4.67643		115695660	59.6496	154.328	31.5194		115697460	20.3019	72.0274	56.0318		115725267	4.77813	0.0945597	13.59		115695704	36.15	8.89859	24.2283		115717129	4.17789	1.97193	1.67424
115699550	10.6134	9.22844	1.99364		115695664	61.5375	186.604	84.3433		115697503	6.35658	130.967	176.53		115725515	14.0243	22.2768	50.2675		115695745	24.5953	7.51583	16.7742		115719236	232.359	0.001	0.0295457
115699719	12.0302	12.5693	1.61984		115695695	110.456	294.442	103.443		115697537	1.47576	16.6112	6.42232		115725594	0.59864	1.784	27.1258		115695772	33.3483	0.308382	13.8301		115719331	1.41132	0.001	0.001
115700192	3.61141	3.27797	0.989701		115695724	20.6722	54.5163	23.0265		115697843	21.4607	76.2921	84.7699		115694678	5.96687	0.650899	13.6594		115695787	4.49064	0.386785	3.80689		115720965	12.1357	0.80264	2.35751
115700242	112.527	99.9793	16.2535		115695793	68.3816	89.4457	8.35209		115698176	0.309367	2.32914	2.60486		115694684	10.9512	4.89691	16.576		115695795	25.6274	2.52946	18.8451		115721045	2.06733	0.001	0.0345013
115700275	5.13321	3.73053	0.403364		115695794	29.5889	93.0365	20.7404		115698262	3.73298	47.9478	28.9362		115694697	2.74812	1.11254	6.85641		115695818	9.73892	3.32824	7.4606		115721407	2.81545	0.96713	1.1847
115700461	147.289	136.314	41.571		115695876	2.86628	17.8856	6.65121		115698284	10.5335	51.1078	50.2135		115694699	2.12492	1.15726	5.83962		115695850	49.06	14.7584	39.0614		115724740	5.65322	1.93517	0.0804693
115700466	20.2265	17.5457	7.31703		115695879	7.55918	40.5304	3.75131		115698584	12.4633	24.9449	30.928		115694731	3.95336	0.65468	6.19652		115695858	1.05266	0.268692	1.03199		115724810	10.8788	0.49347	0.001
115700494	14.934	12.2208	3.46998		115695886	22.8479	48.3588	18.7691		115698628	0.950697	13.0603	7.84599		115694734	0.374825	0.001	14.1307		115695863	8.89919	4.21258	9.52605		115724823	1.85858	0.890946	0.784723
115700506	92.01	88.1895	11.4034		115695900	0.417956	11.7475	0.87063		115698709	0.651081	7.52666	13.3209		115694742	0.011808	0.001	37.5684		115695897	1.29809	0.00497967	1.37541		115724887	9.21466	0.173972	0.0725167
115700564	20.4868	17.197	5.89367		115695945	23.86	31.0249	11.2168		115698761	12.1433	26.8391	24.8263		115694781	1.99335	0.805402	5.87759		115695898	3.47513	0.0581747	3.11722		115724949	7.77192	0.347286	1.4559
115700671	4.6879	3.44258	1.1603		115695974	16.055	172.2	20.5752		115698775	0.720303	2.45382	2.20686		115694804	2.1395	0.713351	2.88809		115695911	57.5841	23.1846	52.4544		115725549	3.19607	0.682921	0.001
115700738	46.8908	35.3532	3.96734		115695993	7.80631	11.2953	0.839378		115698860	0.777929	9.49447	5.34812		115694826	0.196692	1.63413	15.7768		115695921	15.5458	7.66599	15.4978		115725633	21.1248	1.88209	0.0379303
115700787	87.8311	83.9639	11.3628		115696214	3.92042	16.8721	0.945169		115698884	4.09722	12.0552	14.014		115694833	6.9345	2.96256	10.4641		115695927	6.22158	1.12593	3.58214		115694691	245.602	74.163	94.7023
115700897	44.2853	33.2892	1.0234		115696236	7.53928	36.2566	15.3137		115698896	4.53338	10.0203	10.0265		115694862	0.643371	3.17586	13.306		115696217	53.5001	7.30279	47.0692		115694711	3.02079	0.013213	0.159057
115700920	97.6884	87.8295	16.0738		115696238	6.77307	17.5419	8.19646		115698933	8.15646	22.5371	22.7317		115694903	1.52423	0.001	4.61359		115696288	1.08091	0.001	0.64632		115694725	148.995	55.6693	69.1526
115701045	12.1263	10.8571	4.83788		115696240	19.9003	45.3294	5.71205		115699055	3.40335	13.7999	7.86731		115694961	10.3325	1.29761	82.4631		115696310	54.8648	1.64368	30.088		115694735	0.979895	0.556306	0.094254
115701324	5.54445	4.37553	0.146347		115696354	0.037854	3.26965	0.0542967		115699098	15.2809	38.1622	48.256		115695174	0.001	0.001	1.44261		115696858	2.13296	0.906873	1.84712		115694736	1.52748	0.001	0.001
115701434	6.6743	6.21096	0.724075		115696458	0.001	1.04451	0.001		115699128	0.684514	9.36096	5.09982		115695534	0.0268457	0.001	1.03303		115696860	10.2441	0.754715	4.22347		115694739	9.41567	2.7302	0.507596
115701490	14.6405	11.2442	2.04141		115696788	8.02507	37.7129	10.9173		115699165	0.806972	4.61269	5.2674		115695540	0.446253	0.0701087	0.838133		115696865	0.954984	0.074711	1.07785		115694740	31.9684	0.862912	10.4065
115701545	8.55813	8.7034	2.81126		115696826	2.55955	12.2382	1.23134		115699248	49.0272	239.104	121.263		115695566	11.5458	2.79139	20.1814		115696937	4.1528	0.157106	1.70476		115694745	286.041	92.1826	115.684
115701793	16.5769	14.8767	0.665882		115696846	9.06799	17.405	2.4968		115699380	8.48527	20.2984	25.1321		115695578	4.94756	4.14756	28.516		115696939	8.80778	1.4636	4.16911		115694753	49.1797	6.35463	16.2914
115702350	48.4941	47.1582	9.7594		115696863	24.4403	75.5624	23.9752		115699501	3.93219	11.5439	15.0972		115695605	0.148533	0.001	2.23028		115696970	10.7492	5.06091	10.6131		115694767	155.895	0.653039	19.0663
115702407	50.6309	36.0502	10.9525		115696870	11.2788	18.2916	1.27995		115699540	35.1974	194.82	136.506		115695606	0.237369	0.001	1.88618		115697006	1.31275	0.225071	0.67968		115694776	36.2431	17.0979	15.6447
115702645	13.8507	14.3676	6.5149		115696879	667.786	1288.12	176.073		115699562	1.89862	10.9952	8.22714		115695630	0.630364	0.34019	3.89299		115697013	131.116	42.7596	93.0259		115694817	14.0937	3.78023	6.889
115702881	10.2441	10.0281	1.5337		115696885	8.50815	18.5431	8.81353		115699632	9.21857	34.045	26.3979		115695668	2.60583	2.14538	16.2212		115697032	4.88519	1.48785	4.10596		115694839	38.4571	7.88555	13.2547
115702884	18.6861	15.3039	6.12574		115696924	6856.15	11312.6	1542.54		115699670	2.62413	9.89627	6.36948		115695670	1.97621	4.37384	9.69381		115697039	22.3855	10.4474	21.388		115694841	7.59313	1.55426	1.29067
115703068	119.768	86.0581	20.9032		115696956	16.4246	61.0121	3.39362		115699690	11.2035	26.3526	32.2331		115695674	0.256572	0.030969	3.25791		115697090	55.1482	21.3664	61.7822		115694904	19.6928	0.001	0.001
115703163	228.085	199.043	81.5342		115696971	3.72459	9.21906	2.95731		115699705	57.2119	206.797	155.444		115695675	5.59613	5.61742	13.6366		115697104	33.7281	9.95868	28.9201		115695143	0.736056	0.001	0.001
115703484	25.8006	19.934	7.73962		115696989	12.2162	200.04	5.0243		115699908	19.483	85.8526	95.9504		115695661	4.08005	10.3965	22.3547		115697161	3.85669	0.234597	2.51539		115695382	1.98185	0.001	0.001
115703566	8.41707	5.73474	0.250592		115696992	103.053	509.404	34.6152		115700107	9.5957	24.7391	23.9751		115695692	12.8473	4.43542	31.4946		115697171	13.272	1.24513	8.52449		115695403	6.76294	1.27102	2.57408
115703578	86.3682	89.5312	41.5779		115697003	0.551493	17.2395	0.097866		115700246	30.3575	68.5891	63.9991		115695707	5.97613	3.67135	12.5276		115697202	21.1424	1.19287	25.5938		115695417	24.3278	0.934145	2.18544
115703634	4.84242	3.95176	0.518127		115697112	6.18129	22.4788	9.44796		115700337	5.96498	17.5893	17.7102		115695722	1.89369	2.60455	10.6029		115697214	67.3023	15.8634	42.2498		115695624	165.162	80.3735	81.9595
115703727	82.0226	72.9063	15.0298		115697165	10.3599	17.6052	2.61539		115700429	0.515898	8.24314	12.5839		115695739	30.337	31.4939	70.0702		115697217	22.5524	6.34677	14.2155		115695636	34.3625	12.9652	17.1052
115704268	1.66973	1.20488	0.208906		115697188	6.146	55.4864	16.3129		115700478	43.0931	170.649	93.0572		115695748	1.58852	0.0930087	3.58747		115697244	25.8925	10.4296	25.153		115695638	3.11786	0.622455	0.099543
115704298	44.3637	39.1345	16.1892		115697189	5.92698	29.8086	9.92471		115700549	1.25272	9.43477	5.34882		115695753	0.03279	0.001	1.38584		115697289	18.4461	6.00143	18.2229		115695645	1.19743	0.001	0.287943
115704303	42.6567	35.7018	15.7023		115697209	1.33581	3.36214	0.515445		115700593	10.5434	28.3152	23.1729		115695759	4.92558	4.29114	10.9657		115697290	19.0197	5.82153	13.9046		115695651	35.7999	15.147	14.7879
115704537	1.00707	1.02459	0.232265		115697211	25.8014	35.1636	9.59594		115700712	15.7218	49.6968	48.7484		115695768	11.2727	0.0478873	82.4773		115697322	40.0562	14.6393	43.999		115695653	8.131	2.72392	2.01924
115704602	63.9497	65.789	5.21241		115697222	12.1792	15.8358	3.6568		115700780	0.0213623	4.64609	3.05505		115695743	3.88385	11.1757	23.2011		115697323	2.65485	1.2609	2.65623		115695654	18.9997	1.22602	2.61134
115704609	8.06169	5.47362	1.48918		115697238	69.7572	149.351	74.1106		115700893	4.25709	17.8874	19.8208		115695824	9.92254	15.9064	66.4748		115697311	23.7887	8.67064	18.9811		115695656	5.18269	0.001	0.001
115704611	13.0315	13.6087	5.57604		115697275	956.599	1617.41	205.308		115700899	4.2521	9.81036	8.88731		115695826	29.5599	31.6122	65.7777		115697349	28.5412	8.31241	21.7104		115695659	1.13766	0.001	0.124524
115704622	3.29687	2.70322	0.122984		115697299	755.297	1822.09	201.193		115700912	0.473873	7.57992	13.5358		115695851	0.0691973	0.001	4.60758		115697384	14.681	0.286908	8.37923		115695663	10.1319	0.104356	0.059668
115704657	12.7458	10.3108	3.07434		115697308	5.55327	16.6602	2.52357		115700994	6.21819	24.5292	14.0968		115695874	4.34227	3.5104	10.8712		115697409	23.8619	2.78691	11.3744		115695715	2.08867	0.149702	0.351689
115704842	53.1723	53.0388	25.9579		115697309	97.8366	142.567	23.1261		115701091	1.41406	10.7313	6.03169		115695885	6.90962	4.12379	15.9396		115697456	12.2242	2.92392	8.63584		115695729	13.7918	3.29699	3.6189
115705321	3.36632	2.92619	1.38605		115697307	120.681	154.587	21.1163		115701170	1.65348	26.7325	11.2109		115695896	4.90257	0.257023	6.38678		115697461	3.40709	0.580713	3.82753		115695741	2.88735	0.001	0.134133
115705486	2.61297	1.97163	0.858915		115697314	20.062	186.193	28.4694		115701189	3.51342	34.9471	15.9138		115695936	24.2802	11.6169	35.3824		115697463	80.855	29.4416	62		115695742	2.12377	1.20559	0.335586
115705775	11.0243	9.62688	3.13392		115697319	15.8303	19.4531	5.19037		115701250	7.20561	18.8265	15.581		115695941	1.17766	0.452874	3.33152		115697466	43.0222	17.6974	46.1471		115695754	4.3203	0.709767	0.630988
115705907	357.376	363.663	72.3741		115697324	9.5603	35.8578	2.80624		115701322	2.26286	47.6181	37.956		115695961	0.179124	0.001	7.36849		115697476	21.5403	4.89558	14.7411		115695755	9.6667	0.0575017	0.278313
115706149	107.502	88.2927	19.2764		115697365	503.325	3144.74	280.766		115701351	1.71647	5.43398	3.4374		115695987	1.99296	3.68217	7.7069		115697507	61.105	15.1795	46.2921		115695780	5.76653	2.85968	0.199609
115706200	81.6104	81.5895	27.6791		115697368	153.037	186.739	28.6097		115701451	8.67921	17.9492	18.5485		115696215	1.25799	0.595041	5.60785		115697518	9.86239	0.506262	6.1017		115695796	12.8501	0.001	3.00985
115706263	85.5418	61.7875	13.6703		115697399	14.6905	33.367	13.915		115701564	0.017901	14.4613	10.0189		115696230	0.209609	0.001	45.5386		115697520	36.4222	15.824	32.8132		115695797	4.06793	0.179153	0.766122
115706302	24.4966	25.2963	2.226		115697404	2.34709	7.35754	1.09682		115701576	1.18902	3.13377	2.53844		115696251	0.001	0.001	8.41104		115697524	12.2524	2.9939	10.283		115695806	6.83817	2.1227	2.73959
115706358	12.2661	9.46669	2.21415		115697431	13.6621	75.4126	9.10712		115701977	4.93804	18.3853	10.9214		115696407	0.52125	0.269088	2.30123		115697528	20.1936	7.94318	18.7861		115695814	7.88126	2.7455	3.21416
115706398	22.5168	19.3383	7.5388		115697444	68.8334	96.7693	16.589		115702608	2.21994	8.50091	4.98009		115696542	0.106683	0.187437	3.36156		115697530	39.3098	10.4069	21.7615		115695856	31.2151	9.86859	14.5725
115706414	154.246	122.743	29.2798		115697467	5.72847	33.4615	1.95289		115702623	1.39434	7.11952	4.49449		115696650	0.137513	0.852631	31.489		115697559	2.36054	0.82061	2.06646		115695864	9.48593	1.38393	0.001
115706478	352.811	354.156	99.9189		115697472	6.67955	18.9785	1.78425		115702632	2.40328	11.9792	8.30466		115696705	0.073366	0.001	1.88005		115697652	13.9661	3.96644	10.9478		115695865	13.7757	0.001	0.001
115706571	33.4579	29.416	5.00744		115697477	84.2933	117.196	29.7986		115702738	1.84885	12.5312	7.47748		115696706	0.162633	0.073261	2.43599		115697650	1.50668	0.221035	0.895976		115695866	16.278	0.972868	0.001
115706616	2.57899	2.71972	0.60198		115697505	8.3277	23.1922	4.61183		115702739	1.16965	8.35085	5.81272		115696828	0.204914	0.468938	55.4907		115697674	13.4351	3.87068	9.06509		115695868	30.9178	0.659155	0.663453
115706802	10.3376	8.87812	3.39977		115697543	14.91	34.3465	15.3979		115702757	23.3394	66.4408	89.7767		115696830	0.064448	1.23064	4.4883		115697715	103.867	51.727	111.591		115695869	61.7328	14.7584	15.877
115706824	22.6638	19.6995	8.89672		115697546	0.745761	3.17476	1.45476		115702870	4.39033	21.9086	10.7194		115696833	2.14141	0.1199	7.43482		115697719	55.8699	5.02188	56.4336		115695882	70.7896	13.1045	4.38042
115706826	67.8868	58.4914	18.9935		115697557	3.02746	11.207	3.1756		115702924	4.58632	10.0266	10.0267		115696837	3.9219	0.661105	23.8077		115697767	1.32979	0.001	1.47271		115695883	120.397	20.5495	4.04678
115706908	43.1505	45.0975	19.8593		115697569	11.2537	52.7684	17.4201		115702926	19.0387	58.3898	49.9455		115696839	3.5082	1.42735	4.75203		115697778	2.3587	0.337421	2.5569		115695894	8.23154	0.733168	1.13681
115706986	24.8795	18.6766	5.71989		115697584	5.3862	138.583	9.81075		115702931	11.5524	34.3019	29.8854		115696852	0.103184	0.0981623	1.1715		115697792	25.3925	0.897888	11.946		115695903	27.7431	11.9412	11.3318
115707416	16.513	11.9104	4.14978		115697596	1.02006	10.086	2.06844		115702965	7.81464	30.1671	14.8393		115696861	1.30298	0.213552	9.45465		115697821	35.7246	14.6809	31.8022		115695906	420.699	146.464	203.691
115707677	8.71893	8.46348	2.19062		115697639	117.573	312.565	69.7213		115703215	49.5981	108.247	147.012		115696874	2.07805	2.0573	5.2533		115697820	13.2647	3.19832	7.79046		115695916	267.122	98.6385	59.0576
115707841	64.9711	62.8387	11.7955		115697648	5.23099	12.0735	1.41734		115703587	0.512919	3.66493	4.08556		115696881	0.49079	0.242142	0.789088		115697837	17.1853	0.001	21.6265		115695918	43.217	12.1553	20.5754
115707892	1.43873	1.21551	0.182273		115697703	83.0399	109.165	34.7563		115703603	5.94451	11.8946	13.6271		115696893	1.24602	0.580281	1.73575		115697842	19.8279	9.01075	18.0575		115695919	1.59098	0.001	0.500927
115708136	18.1816	19.1734	0.971641		115697726	8.58307	21.4601	6.70479		115703939	34.3036	73.7256	90.3115		115696898	5.16552	5.15401	23.2577		115697866	7.33337	2.01331	4.32819		115695924	24.2606	4.15299	2.89067
115708272	11.1613	8.83242	3.22786		115697737	5.03307	58.3059	2.19183		115704151	0.22865	1.78189	1.40475		115696904	2.55831	0.999313	3.35999		115697883	14.7816	4.06253	11.8543		115695925	189.575	68.4339	58.3526
115708685	2.70965	2.13609	0.800174		115697736	13.1738	1442.65	25.2147		115704650	1.99106	7.13696	4.6003		115696908	1.0581	0.281323	36.6158		115697888	132.882	39.5296	149.094		115695926	3.88413	0.157417	0.001
115708828	25.2059	19.3066	6.41573		115697744	2.37946	6.16571	0.45996		115704700	0.852152	3.89212	3.24909		115696914	0.193191	0.511502	1.82993		115697902	7.67922	1.48389	5.69724		115695928	61.3382	0.001	0.00915967
115708831	5.76747	5.2525	0.969373		115697780	7.29816	9.38601	2.58368		115704753	2.52417	5.97615	5.30925		115696919	1.00244	0.148219	2.03463		115697973	62.1864	12.0525	65.5992		115695930	2.87719	0.001	0.001
115709061	102.171	76.1628	4.45567		115697797	6.3669	22.251	9.08293		115704857	38.4781	82.4629	107.575		115696927	0.167242	0.379046	2.20422		115697974	14.9392	2.69625	7.30113		115695950	1.48446	0.406213	0.380002
115709168	17.5919	12.6538	3.53578		115697803	0.518643	1.5958	0.486737		115704867	0.108972	0.790975	0.938417		115696935	1.12005	0.001	2.29684		115697992	21.3069	3.74912	12.4757		115695955	20.9717	0.140402	0.263773
115709359	389.968	365.564	109.716		115697824	31.4426	128.496	18.2367		115704882	7.66951	43.8157	35.8646		115696940	0.390338	0.001	5.36273		115698000	1.83556	0.514459	1.50787		115695960	6.90317	0.061473	0.478482
115709370	13.7408	10.7749	1.73709		115697864	99.1426	305.694	115.793		115705017	4.37298	10.0057	12.1115		115696960	0.289665	0.051819	2.05935		115698001	12.7441	3.77174	11.5602		115695963	37.1986	13.2573	18.5284
115709429	20.1511	21.6064	7.50835		115697869	7.32942	18.9753	7.68958		115705077	25.4802	85.3879	72.3159		115696962	1.85382	0.60527	3.95517		115698064	9.18353	0.001	5.20196		115695983	2.26421	0.0708723	0.577515
115709937	125.617	101.944	44.2505		115697881	6.58708	37.5797	14.3537		115705150	4.3865	12.1046	10.5095		115696963	0.141914	0.001	10.9412		115698066	11.7567	2.09028	10.7104		115696219	26.2796	10.8141	13.0231
115710182	140.661	108.357	3.67362		115697884	16.8065	44.6017	21.7532		115705181	8.90245	18.552	22.7286		115697008	0.505363	0.001	2.8271		115698079	2.77445	0.001	2.6023		115696242	2.47708	0.34573	0.0176883
115710658	13.5176	9.57616	1.38693		115697903	18.0581	38.7124	3.27165		115705182	2.2601	4.74341	6.06296		115697023	0.372933	0.001	21.7226		115698112	183.95	48.7077	114.212		115696243	1.08069	0.0421117	0.352516
115711146	4.4259	4.6323	0.771004		115697928	0.789051	1.64287	0.671423		115705223	12.238	33.7093	29.7104		115697024	0.121263	0.117068	1.93376		115698126	58.5078	9.23454	55.8954		115696245	20.3786	5.88743	8.85585
115711158	33.7261	25.98	4.66495		115697926	28.6181	67.5428	21.6055		115705225	6.78801	17.4116	15.9268		115697036	13.4068	3.80105	50.3901		115698146	62.4876	18.6815	43.5696		115696249	4.07843	0.720094	0.952248
115711449	1.54176	1.22766	0.419858		115697975	1.12921	13.5162	0.69902		115705258	0.558845	2.52828	1.7638		115697040	30.9697	20.0612	67.1752		115698162	8.78275	0.314755	3.52946		115696250	9.52266	0.212955	1.43755
115711557	12.6358	8.8835	1.80107		115697988	7.04814	28.5694	1.45299		115705313	52.4667	276.412	431.421		115697041	2.49858	1.37377	7.01357		115698198	14.8894	5.00142	13.7486		115696266	2.06685	0.195944	0.0176797
115712053	7.84688	5.36112	0.247714		115698003	19.7175	51.1646	10.1152		115705325	3.38455	11.3305	11.7005		115697048	1.02009	0.0457607	1.85397		115698202	3.9986	0.992418	2.39944		115696267	7.96295	0.0999433	0.007898
115712068	2.69955	2.24515	0.781018		115698045	3.45259	7.30446	0.282477		115705355	1.25569	4.60401	5.95092		115697049	1.37435	3.02047	5.35796		115698214	8.34727	1.84859	5.26408		115696549	3.55139	0.464261	0.864858
115712103	1.46101	1.04443	0.100078		115698056	3.65919	6.44273	0.351049		115705357	5.0426	15.8791	12.8411		115697055	1.99285	1.97705	4.56419		115698220	7.12396	2.41924	5.98492		115696573	6.2804	1.09684	1.74364
115712147	11.0549	8.48706	0.742693		115698103	1.25138	14.5281	0.565198		115705469	12.9006	43.8212	32.1999		115697071	0.686987	1.02652	5.32336		115698219	11.7165	1.44613	9.87235		115696609	2.31751	0.333841	0.875212
115712303	1.46976	1.36073	0.481724		115698108	130.687	506.75	39.9843		115705482	3.22754	8.67498	8.9592		115697078	0.0547633	0.001	1.61629		115698224	24.6055	4.94912	12.0794		115696768	1.63949	0.361573	0.298929
115712403	2.59311	2.24207	0.348324		115698129	15.3579	64.5652	16.9743		115705515	1.3932	3.3651	3.78894		115697082	0.425167	0.57305	2.98272		115698231	20.6683	4.3295	15.4819		115696797	2.89699	0.411642	1.2774
115712629	81.9718	51.2308	0.669937		115698174	11.4954	27.2405	5.45849		115705554	0.926706	5.4098	4.26789		115697094	2.68758	2.28077	5.76225		115698235	2.92539	0.089372	1.15098		115696814	9.10272	1.63804	1.55579
115712669	131.812	104.222	34.5363		115698204	27.5518	64.9624	17		115705593	15.3573	32.962	42.1708		115697107	10.3018	33.0352	63.6297		115698241	37.5957	4.02276	45.2227		115696838	1.68109	0.001	0.321287
115712850	60.0704	55.0339	3.36951		115698206	6.73256	25.2621	11.0648		115705626	19.5149	41.9128	56.1729		115697113	1.06405	1.24827	38.2418		115698242	7.00038	2.05478	6.98262		115696844	4.04593	0.001	0.93815
115712969	0.997439	0.972772	0.299651		115698234	24.1981	27.9235	7.58782		115705712	4.89663	12.8574	15.5714		115697119	0.0797067	0.793657	4.60597		115698254	1.76948	0.0436843	1.16162		115696869	2.33189	0.0808743	0.0387963
115713406	14.0781	12.9176	4.21523		115698263	0.250412	11.2317	0.477841		115705863	0.487129	2.84634	4.42984		115697130	0.001	0.001	6.4698		115698269	5.88349	1.28627	3.61885		115696872	452.893	0.275264	2.15844
115714005	13.8665	14.1068	0.540524		115698275	10.5801	22.3288	10.5352		115705903	6.38345	15.2526	18.6852		115697135	3.01397	8.02352	27.3961		115698310	6.16269	0.759378	6.58042		115696873	1.4239	0.001	0.001
115714175	28.2245	27.24	7.942		115698287	5.51218	16.4879	1.48795		115705991	0.147198	1.60892	1.05371		115697149	189.644	80.0708	290.947		115698324	196.174	58.6166	142.982		115696884	4.08173	0.0477033	0.001
115714313	16.9907	12.2218	4.50665		115698309	527.765	1152.06	61.6767		115706006	0.825892	1.95452	2.88593		115697154	22.6211	3.39101	146.003		115698489	14.6364	2.91912	10.0366		115696900	104.971	4.16013	1.88705
115714340	19.8683	14.5257	5.87878		115698500	8.15156	24.4787	11.9354		115706164	0.21812	1.28908	0.617547		115697170	0.226895	0.0702487	9.01148		115698498	10.1001	1.22989	5.40464		115696902	4.6236	1.67725	0.484713
115714465	29.8557	31.0042	2.15048		115698575	17.1922	49.6187	17.3546		115706223	4.08407	8.86683	10.927		115697175	0.839677	2.55066	8.59577		115698512	6.54124	2.61812	6.24592		115696909	2.12237	0.001	0.001
115714489	3.62707	3.55147	1.37381		115698581	15.5011	44.9769	7.94525		115706270	39.4752	185.109	302.498		115697186	75.7767	51.9115	169.128		115698513	8.653	2.42921	9.60232		115696921	2.18813	0.207146	0.762009
115714607	4.63307	3.35262	0.21714		115698597	17.0002	58.5285	22.7755		115706269	14.0081	28.6927	37.7332		115697199	20.2281	8.18782	24.9067		115698545	19.2071	6.54716	13.7458		115696934	4.04354	1.91139	0.0277637
115714820	12.498	13.6694	2.68281		115698609	2.82723	7.05172	2.08706		115706411	2.94359	10.4845	6.40659		115697205	15.4278	2.22008	24.1541		115698554	10.3443	1.14348	4.70696		115696941	7.97025	0.22221	0.161588
115715203	8.57241	8.88761	3.01027		115698612	7.07488	26.7088	1.14627		115706412	1.10067	5.53692	3.71257		115697236	20.1159	5.33811	28.7541		115698557	16.8129	0.145194	7.96633		115696958	9.92535	0.001	0.269882
115715219	4.16111	3.05174	0.59653		115698646	17.3175	44.2497	2.29971		115706435	4.28873	10.9915	10.7772		115697240	31.4261	44.417	132.188		115698561	18.8624	3.24271	14.9716		115696959	17.1182	0.65771	3.70537
115715228	77.5813	57.2758	7.46324		115698664	4.86265	50.5635	3.41024		115706452	6.49646	30.8732	21.2819		115697260	2.05067	0.42274	3.29337		115698610	7.17178	3.13295	7.10704		115696976	6.43929	0.001	0.083186
115715313	11.1818	10.6936	4.15684		115698677	0.898943	53.0932	3.91066		115706470	73.3562	209.643	284.866		115697267	27.6898	13.7491	57.7161		115698637	11.1454	2.99641	13.1632		115696981	25.2088	3.59007	1.18686
115715319	11.6793	10.3573	4.86051		115698702	5.35911	13.327	1.4456		115706493	20.216	41.9141	53.3439		115697301	8.22652	2.51677	40.1164		115698659	4.84329	2.10157	5.25174		115696984	3.11897	0.863152	0.0141773
115715731	5.94216	3.90059	0.13142		115698716	27.5838	128.158	3.72887		115706511	2.58422	33.2375	20.1312		115697316	1.63479	0.514998	9.34324		115698696	5.665	1.28589	5.56224		115696996	5.66786	0.419538	1.46147
115715775	8.51583	8.87695	0.638017		115698721	30.8614	98.3934	10.399		115706576	1.39157	3.69937	3.56365		115697330	16.5667	8.54676	114.177		115698723	69.2107	9.07954	59.0352		115697004	13.1062	0.001	0.132769
115716320	3.15396	2.11386	0.129536		115698773	15.292	38.2771	0.829616		115706577	1.3304	3.6142	3.51932		115697340	37.9565	28.8523	77.2257		115698737	6.39273	1.69011	3.45163		115697005	108.021	20.1445	10.5761
115716714	30.5607	28.0199	7.85757		115698783	3.49472	29.5753	0.48579		115706648	29.25	159.561	114.262		115697346	12.3403	9.16941	38.6695		115698760	5.49092	1.18878	6.31854		115697017	1.15244	0.001	0.0796353
115716846	20.8374	22.2386	4.75911		115698801	30.9505	95.5903	31.1236		115706667	10.3943	24.3222	34.9227		115697353	1.55866	1.73385	7.08365		115698807	84.6212	11.7036	72.2388		115697029	3.05936	0.460298	0.820162
115716884	7.47339	4.79037	0.157978		115698810	0.308326	1.40352	0.0963447		115706709	4.06113	12.6852	20.1407		115697354	1.09933	1.89636	7.94767		115698847	9.68673	2.26649	5.67307		115697060	2.53551	0.331667	0.0299297
115716949	109.604	99.8571	20.5396		115698825	64.772	144.401	15.42		115706736	4.72562	14.8296	23.559		115697363	0.034599	0.001	2.71984		115698861	1.90744	0.001	0.702044		115697095	9.36788	3.72047	2.5975
115717037	2.14594	1.35875	0.0613073		115698834	2.33519	16.1027	6.39498		115706805	1.65196	4.0656	3.81824		115697385	2.70946	0.734707	39.0429		115698900	1.51074	0.052311	1.04526		115697141	2.32263	0.026334	0.0443203
115717084	19.5913	13.5644	4.2667		115698859	3.78022	44.6534	1.44809		115706813	2.8761	6.40072	5.91499		115697396	5.39198	5.32207	14.1197		115698912	10.197	0.788384	8.71483		115697142	1.41423	0.296272	0.443483
115717391	53.7026	40.7105	4.70572		115698880	19.3145	93.8694	17.3683		115706920	2.20182	6.11588	5.05085		115697397	7.00497	3.13247	15.782		115698941	20.3232	2.56072	20.8097		115697143	0.992041	0.001	0.0318727
115718396	9.16515	9.22582	4.00176		115698882	0.877736	5.76919	0.444173		115706939	15.1387	45.6189	40.1158		115697395	13.8033	12.9666	28.6428		115698975	58.2253	16.1552	59.9683		115697159	8.77961	1.90865	2.49083
115718581	55.1765	43	18.1102		115698914	0.377905	2.49651	0.163952		115707112	24.6208	79.5401	68.8011		115697412	2.37679	3.29244	13.4775		115699006	3.60462	0.903014	2.2892		115697198	13.5945	4.61195	6.39582
115718822	53.5015	49.642	17.4573		115698935	1.35506	10.3991	0.707914		115707180	7.72584	18.7329	18.7006		115697415	10.2396	8.97175	21.3519		115699049	29.1637	10.1872	31.1801		115697224	255.528	77.6791	95.5532
115718918	63.5159	49.4786	10.9105		115698953	0.24337	2.54402	0.335275		115707259	0.056385	1.10459	0.532364		115697462	1.28316	1.33194	2.96226		115699084	13.7295	3.41254	8.43581		115697225	54.844	1.46293	0.775423
115718919	95.6558	77.0292	15.8501		115699067	9.44819	104.625	24.6825		115707297	8.5936	18.1137	18.2435		115697465	18.2187	8.45107	29.8207		115699093	14.4277	1.88876	6.41879		115697242	5.33589	0.756805	1.07079
115718928	1.13823	1.16384	0.218419		115699070	47.8525	142.278	12.0706		115707313	22.5979	52.0887	61.3265		115697475	5.31575	0.674922	10.2526		115699100	31.8346	8.24491	25.2021		115697250	8.80352	0.514083	2.39362
115718960	18.4192	17.1737	1.98832		115699133	25.3233	50.9544	20.0438		115707419	2.70181	10.0534	5.88466		115697489	2.58829	7.8725	54.1754		115699103	19.1804	6.84971	15.2541		115697266	10.4076	1.48391	1.71302
115718974	23.9497	21.0198	6.50021		115699138	13.9962	23.8129	6.73738		115707433	14.1033	30.8061	43.6543		115697492	7.76629	4.94869	33.687		115699135	52.1642	20.5212	51.0542		115697272	12.6521	0.187374	3.17932
115719458	9.46896	9.58568	0.68157		115699178	20.8017	72.4784	21.7181		115707465	1.40639	6.82013	8.19515		115697498	16.784	14.3524	50.8293		115699174	127.651	56.5623	113.31		115697281	225.255	109.551	111.17
115719488	9.06945	6.96681	2.82275		115699224	4.67215	11.8044	0.387951		115707470	0.845164	2.468	3.2252		115697473	30.911	11.0988	52.8641		115699204	16.6017	7.14814	16.666		115697282	210.948	56.833	85.1528
115719619	16.4453	12.2779	3.58579		115699246	49.4173	65.6476	22.4288		115707524	9.13801	22.3004	19.9962		115697512	0.453166	0.001	4.69626		115699240	25.7194	7.55339	17.9874		115697283	26.2785	0.327526	0.250212
115719620	12.6501	8.90314	0.460184		115699265	29.056	116.601	35.0856		115707557	5.04027	16.4836	11.153		115697513	5.78615	18.0569	90.6771		115699249	7.89917	2.42946	5.50022		115697284	34.3117	1.89103	3.58207
115720575	83.8415	58.1933	7.18694		115699266	27.3221	100.399	12.5958		115707558	0.628417	1.38642	1.44312		115697531	2.4269	11.6901	63.3702		115699252	2.75241	0.972486	3.21394		115697313	27.9785	0.779623	0.97055
115720602	4.92167	3.14136	0.109981		115699305	20.7445	220.984	32.3347		115707589	22.017	185.381	86.2199		115697535	3.64397	3.59178	8.87147		115699259	38.517	2.05691	22.8304		115697351	3.52888	1.67752	1.05718
115721014	1.37949	0.939477	0.098287		115699312	18.8686	262.402	22.7782		115707608	17.8542	38.5351	43.1717		115697539	12.8082	25.3157	58.4481		115699261	5.00131	0.475542	4.05802		115697362	33.7621	4.33949	0.141858
115721015	2.96136	1.95665	0.050119		115699321	40.8291	108.018	48.9651		115707612	2.34905	7.00185	5.05996		115697540	90.8075	44.3329	125.996		115699300	12.6735	4.18118	9.39456		115697370	178.434	39.5956	70.038
115721128	3.83081	2.79489	0.001		115699335	28.9112	64.0936	28.635		115707646	15.3893	60.8195	34.4658		115697561	1.09591	0.467267	16.4458		115699301	24.0103	1.67336	13.6009		115697373	10.0704	2.03471	0.913913
115721252	10.6476	7.90742	2.70612		115699345	13.2002	59.4601	7.00708		115707749	26.681	124.683	73.9607		115697573	0.403139	0.001	1.95145		115699307	9.64805	1.53373	6.00063		115697374	3899.42	1600.83	1070.72
115721383	24.7004	20.5156	4.56725		115699353	812.048	1473.57	150.475		115707751	2.8009	11.8075	9.15162		115697575	0.448912	0.001	2.73067		115699313	12.8981	2.23758	8.3878		115697377	21.3927	1.6978	6.27227
115721440	5.36934	3.73215	1.21288		115699360	233.972	1451.79	99.0055		115707797	1.58959	8.07313	11.1784		115697553	42.3675	15.2595	67.4356		115699316	12.8993	4.19989	8.65944		115697380	2.03719	0.001	0.0915737
115721752	41.537	34.5366	3.77262		115699366	62.4576	433.595	57.0877		115707923	6.55911	20.5844	22.5259		115697612	0.158068	0.935318	92.306		115699324	14.6618	1.92129	6.98703		115697416	23.1961	0.120845	0.409531
115722025	22.1077	15.5008	3.47651		115699371	101.454	256.081	68.1314		115707957	52.8626	115.937	136.37		115697615	4.28208	5.70269	26.2496		115699327	2.53944	0.001	0.958745		115697423	2.45014	0.855172	0.69009
115722183	23.8843	22.2407	4.4991		115699386	10.8441	38.202	3.79666		115708216	10.4428	38.3999	23.7077		115697646	3.28304	0.634272	7.18263		115699352	25.2047	6.24377	26.0641		115697428	36.5456	7.59677	13.704
115722629	63.9156	54.6841	11.3028		115699388	22.4463	29.9215	3.45929		115708651	22.5716	108.878	60.6642		115697676	5.33264	4.79519	22.8323		115699356	1.65552	0.167275	1.59928		115697437	27.7321	0.397444	1.94519
115722775	7.433	6.17537	0.871484		115699401	2.74323	4.04057	1.03363		115708657	1.77137	5.63402	6.32674		115697734	3.21505	2.80215	20.0257		115699369	3.14692	0.74934	2.17345		115697470	18.5556	2.36451	3.56351
115722786	6.58142	6.89677	1.93151		115699412	154.768	935.152	90.0935		115708713	1.83466	4.91957	5.61289		115697760	0.102676	0.001	7.5262		115699403	5.15246	1.00775	2.84835		115697474	113.247	13.7829	20.9301
115722895	94.8296	77.808	7.69753		115699418	14.5179	147.548	31.5259		115708940	0.212895	2.1252	1.19062		115697777	2.82955	0.426989	6.68573		115699405	16.3787	4.0738	12.8449		115697483	8.45009	3.18006	3.41721
115723007	3.15445	3.10938	0.0680313		115699417	15.0607	53.8503	21.8185		115709290	162.883	495.838	427.516		115697774	5.40495	2.12559	7.30893		115699433	2.46725	0.137958	1.40571		115697485	30.224	0.001	5.00063
115723370	86.8875	74.9823	15.0822		115699430	0.394744	60.4355	1.18811		115709331	6.10064	12.6945	13.869		115697794	0.207681	0.173145	5.0225		115699468	18.145	4.76499	10.0685		115697490	13.6396	0.724523	3.97565
115723432	56.8931	50.8251	21.5347		115699431	0.547594	10.0582	3.169		115709360	3.63638	10.0082	9.27929		115697795	34.0125	23.3204	74.5876		115699470	29.2522	2.25063	19.9901		115697499	26.8753	2.23676	2.77999
115724557	39.2454	39.982	15.4959		115699444	78.1534	99.8836	17.8252		115709388	46.5155	116.532	131.582		115697798	7.26926	1.52419	10.758		115699471	23.124	8.93853	18.8632		115697502	50.4945	18.6	24.0157
115724657	2.40727	2.53695	0.44632		115699454	8.41348	62.9303	5.23238		115709433	4.13059	16.5311	16.6376		115697811	1.26395	27.2363	68.6603		115699511	30.1035	11.0384	34.3766		115697508	8.0124	3.13203	3.14416
115724688	10.8252	10.2644	1.28658		115699457	9.76487	25.0213	8.56701		115709472	17.9189	134.645	117.373		115697812	3.69999	1.6917	6.87084		115699513	40.1413	19.3946	42.0552		115697517	22.376	5.16473	10.0528
115725080	1.47061	1.07431	0.179776		115699461	26.0891	52.8863	14.2314		115709547	40.2737	138.735	96.607		115697825	0.486274	0.21678	4.3423		115699516	95.1304	3.03971	55.4003		115697519	10.889	4.68088	4.74011
115725094	109.52	88.1249	32.1537		115699480	36.8802	121.732	22.634		115709610	32.912	81.918	96.6992		115697832	24.045	11.9592	56.6961		115699526	1.35308	0.225932	0.669656		115697525	6.04766	0.092637	0.370814
115725387	7.77292	6.22343	1.77759		115699502	2.47151	7.05638	1.41402		115709632	0.97049	11.1885	7.53724		115697847	3.95554	5.3798	17.8881		115699567	1.61004	0.613064	1.80532		115697527	3.3739	0.697748	0.22737
115725462	124.464	127.156	45.9465		115699519	9.79572	21.5866	10.1145		115709647	14.2348	32.9545	47.3963		115697856	5.5182	4.22898	18.7781		115699570	32.6167	6.58547	17.1219		115697536	7.92768	4.20393	0.102056
115725666	4.13392	2.96699	1.17421		115699553	116.388	203.353	33.0433		115709663	13.3708	102.418	81.5677		115697858	0.158283	3.16653	41.9722		115699604	9.51747	1.01772	4.69886		115697547	1.27085	0.001	0.22467
115722038	3.8367	2.73105	0.0424887		115699554	42.4939	123.769	20.6368		115709736	6.88584	14.9649	15.9407		115697887	0.195624	0.534917	1.82214		115699609	2.40333	0.001	1.20712		115697558	3.71832	0.288579	1.37557
115705368	12.3872	11.5814	5.34477		115699597	51.6345	160.006	25.4655		115709904	3.4137	8.1354	8.28224		115697891	0.48441	13.198	44.0794		115699619	18.2594	1.82507	17.7005		115697560	108.214	0.933547	0.0252673
115713658	14.0266	13.2312	2.75319		115699614	2.0287	30.4193	4.41303		115709934	7.58974	17.7853	21.0564		115697894	2.62329	0.420964	11.1692		115699620	13.8246	1.26368	6.59911		115697567	147.001	0.481557	0.0326893
115705732	197.854	154.641	44.4402		115699622	8.11487	17.6033	8.00532		115710164	0.488283	1.07408	1.53093		115697904	0.684387	1.0511	3.83458		115699637	0.888066	0.215334	0.969972		115697568	33.3956	0.001	0.001
115705724	491.064	417.436	110.688		115699629	74.4345	100.144	24.1077		115710176	11.5967	29.7645	30.8688		115697913	49.3178	21.9253	58.0905		115699642	32.1911	8.02937	22.9544		115697576	97.2354	0.001	0.573853
115705719	152.397	135.241	35.6926		115699645	23.1088	74.7568	27.3939		115710268	14.1643	32.5411	40.9882		115697924	0.950111	1.50863	3.86862		115699649	2.26833	0.778175	2.02672		115697580	0.985635	0.001	0.001
115710965	1.48379	1.48493	0.009677		115699650	28.121	39.3977	8.67437		115711244	14.4787	29.5242	30.8224		115697931	5.80697	7.67111	20.5677		115699651	44.2868	10.361	39.9169		115697587	17.824	0.001	0.001
115717976	20.9744	19.9703	2.31499		115699672	38.3991	53.6775	14.6122		115711278	3.94455	8.8499	9.80033		115697950	0.367227	1.37826	4.83582		115699654	11.7981	1.29046	6.08645		115697592	16.8361	9.91872	1.425
115716509	11.6825	11.9095	5.19529		115699676	18.6289	49.9508	14.4368		115711342	2.77053	9.3806	11.3764		115697964	10.859	3.13453	16.0579		115699674	7.6273	1.32689	5.47269		115697610	583.394	62.7744	214.028
115706755	62.1526	66.1262	19.1587		115699677	8.56809	11.1631	1.71198		115711472	0.594434	30.0344	14.7737		115697978	4.22667	0.510978	5.71415		115699675	53.5633	20.0288	46.7367		115697611	37.8724	20.417	9.74573
115708523	791.858	608.281	68.3945		115699678	19.7326	123.283	27.2847		115711540	4.31555	11.9164	11.6098		115698013	15.0248	6.38921	19.4949		115699686	25.0914	10.239	21.2403		115697624	368.337	103.812	132.584
115703372	246.465	182.585	42.2561		115699708	6.4875	64.324	5.05646		115711602	5.88982	17.9455	17.0164		115698018	10.8434	15.5808	35.5823		115699736	39.4876	8.89419	26.8572		115697667	1.69916	0.001	0.0349377
115717709	15.5415	13.8769	3.85587		115699715	14.8387	44.1385	20.585		115711662	4.46945	9.97682	9.80085		115698019	5.22146	4.59914	14.3816		115699737	5.13073	0.363964	2.34884		115697692	48.7153	6.75398	17.0708
					115699726	8.77532	24.1665	3.58548		115711925	12.7865	50.9779	31.817		115698090	6.54205	1.99402	23.7245		115699748	6.32402	2.28205	6.80985		115697693	45.9197	12.9757	20.5042
					115699746	13.8314	36.1039	8.75009		115711948	2.5648	8.57202	6.03132		115698125	6.65491	7.56274	16.6003		115699755	108.073	33.1333	115.269		115697695	348.114	0.001	0.249716
					115699751	18.9682	56.8093	18.5054		115711963	11.7696	36.0847	26.3336		115698131	9.72768	3.59092	11.6053		115699790	2.42523	0.287309	1.43865		115697697	18.587	0.103806	0.0243597
					115699757	0.359811	2.88709	0.911908		115712195	7.38655	21.1032	20.0564		115698142	29.365	13.1901	44.0515		115699804	9.74641	1.4824	4.54872		115697699	11.7812	0.324518	0.001
					115699770	25.7668	67.5292	5.18461		115712210	27.209	66.5246	71.6123		115698145	12.4425	15.4792	35.6587		115699845	13.2159	5.86842	12.3128		115697700	9.82799	2.21497	3.50298
					115699851	10.627	47.9158	16.0935		115712227	0.0818153	1.11814	0.43828		115698149	8.60714	0.87044	11.9371		115699870	81.8446	26.874	66.0093		115697704	14.7604	3.40831	6.43644
					115699971	28.6432	668.835	17.4803		115712233	10.4442	52.7288	55.406		115698152	3.06308	0.404047	14.5928		115699881	33.0237	13.7352	28.3082		115697710	125.279	59.0139	36.8294
					115700030	106.097	562.03	23.818		115712234	73.9555	600.107	291.326		115698161	3.94048	2.08806	16.8212		115699918	11.1478	2.39121	5.60654		115697711	10.6541	4.43514	3.09328
					115700187	1.84478	10.6924	1.93475		115712362	1.691	12.0667	19.9138		115698165	2.89775	10.8516	26.0864		115699996	1.30006	0.001	1.40231		115697716	12.0796	3.35497	0.406518
					115700207	3.03305	7.67393	0.703513		115712422	0.0125653	1.99622	2.61998		115698168	16.8932	17.074	45.0918		115700026	1.10124	0.110549	1.32512		115697720	24.2756	0.257917	0.956235
					115700219	16.5752	69.0652	14.8871		115712455	0.370429	16.4554	19.0926		115698184	23.7698	18.5334	82.2847		115700384	1.96064	0.964596	2.00562		115697724	92.2282	10.2273	0.303054
					115700236	1.21569	4.55363	0.097968		115712511	13.4375	30.8661	41.2459		115698183	4.67883	7.86199	18.1448		115700397	1.80022	0.001	0.68967		115697732	14.8977	0.705778	4.47972
					115700300	33.4982	46.0605	12.1562		115712526	0.996632	6.17671	4.47577		115698191	0.813623	0.997894	5.1754		115700426	28.2731	2.08648	25.8103		115697741	8.40647	0.228183	0.82765
					115700450	12.4651	19.6353	3.91945		115712598	2.33498	5.45693	6.69972		115698193	0.766451	0.593135	10.2659		115700434	69.1383	4.64919	34.5677		115697754	2.64485	0.001	0.001
					115700453	345.062	685.099	60.9269		115712737	0.870444	45.4775	56.7483		115698192	15.5368	14.3539	53.4654		115700446	22.2017	2.53654	17.0582		115697755	27.7422	0.001	0.001
					115700458	76.6307	224.908	88.2937		115712758	6.21442	12.6358	15.4478		115698203	2.2649	1.26562	8.26548		115700447	11.3163	2.83368	8.80658		115697758	3.55612	0.115377	0.045543
					115700524	25.5435	128.697	5.20984		115712793	44.7851	120.196	93.5522		115698217	2.41719	0.61623	83.202		115700448	26.6861	0.324073	11.7153		115697762	43.9097	0.043482	0.0176917
					115700538	33.216	47.9542	10.3382		115712794	9.09449	19.0037	23.9071		115698222	3.43447	2.8221	10.2886		115700456	106.727	19.3224	73.727		115697766	19.4105	0.250898	1.45023
					115700557	1.7391	9.47844	3.5308		115712872	17.4041	36.4431	36.4878		115698227	11.9761	8.66351	52.3231		115700472	3.44594	1.6215	3.70208		115697769	562.33	154.195	238.27
					115700574	65.8165	134.798	14.0835		115712896	60.311	142.193	125.844		115698240	25.9963	21.2808	418.489		115700474	47.1569	8.29019	37.2425		115697782	4.428	0.0748417	0.293751
					115700587	26.5356	164.425	30.4391		115712995	1.47582	3.76858	3.80482		115698245	21.462	18.7692	49.1571		115700475	32.5188	13.0463	29.641		115697788	20.5306	0.191818	1.57593
					115700590	9.40672	17.0161	2.78083		115713034	23.8501	47.7443	64.1583		115698252	4.49943	1.07358	19.7757		115700479	6.0401	0.27108	6.69835		115697791	13.6828	0.0940243	0.863684
					115700624	71.0805	80.1748	17.0657		115713090	0.323054	2.9644	3.48093		115698256	9.13184	1.74635	14.6219		115700484	34.6618	0.182622	15.7517		115697802	8.04851	1.86326	2.42941
					115700638	8.58019	44.515	8.70587		115713888	0.675009	1.94208	2.7926		115698260	0.0616583	0.242498	2.00805		115700491	6.99828	0.192918	2.63836		115697808	4.09736	0.068726	0.513967
					115700691	38.8585	91.4552	38.9005		115713900	10.6809	22.1496	25.3255		115698308	1.09378	0.001	13.1342		115700515	33.4688	3.23089	29.4192		115697813	8.02106	0.416292	2.03523
					115700694	5.52493	9.725	0.582582		115713929	6.12859	13.4543	16.018		115698314	7.38949	6.63291	49.7612		115700516	5.35468	1.47692	4.67593		115697814	1361.89	123.565	4.25512
					115700697	4.78947	14.4915	4.86388		115714073	2.74096	23.0444	12.2504		115698470	30.277	42.5083	86.0181		115700517	26.1285	0.104943	10.7425		115697823	2.54183	0.001	0.808717
					115700717	18.5305	106.701	2.86491		115714093	5.5633	37.608	16.3951		115698488	1.2138	0.533295	7.44162		115700528	21.9851	4.50407	10.8608		115697828	1594.39	149.418	4.93679
					115700744	53.223	186.817	15.6616		115714155	0.971339	58.2687	51.0738		115698499	8.74353	1.95557	25.6404		115700532	2.96883	1.07612	2.30561		115697831	8.28194	0.222105	2.16168
					115700756	6.02027	68.7005	5.1883		115714215	0.236265	0.793613	0.842718		115698502	10.702	9.53656	32.092		115700536	7.55305	0.980458	3.76215		115697836	3.19491	0.433682	1.27425
					115700762	7.86656	42.888	11.9374		115714329	0.924481	5.74893	4.04082		115698515	8.54834	7.59357	40.0222		115700546	13.7858	5.68286	13.6999		115697853	291.893	132.721	17.819
					115700765	4.13337	15.4416	1.20356		115714331	7.29469	37.1768	58.3356		115698516	11.0377	10.3896	49.9973		115700554	20.3364	2.71582	12.6848		115697859	19.1541	0.137874	1.90056
					115700779	23.5988	29.607	7.68125		115714342	2.67154	10.6963	9.62528		115698539	0.40229	1.11055	5.22327		115700562	6.9109	2.72271	5.55691		115697865	36.5246	0.170625	0.257704
					115700794	16.4027	19.4849	4.75173		115714531	2.84621	9.23709	10.2736		115698538	4.96648	2.51694	12.8638		115700569	2.38522	0.09623	3.00162		115697879	11.0334	0.680799	0.649208
					115700797	4.40206	10.9531	0.975541		115714632	1.47863	7.29979	7.88875		115698558	0.348661	0.645088	11.4314		115700576	18.79	3.2314	14.9098		115697880	5.65301	0.001	0.001
					115700808	2.47563	13.457	1.39158		115714717	4.73767	19.2194	14.3936		115698559	0.265481	0.238809	1.51388		115700577	43.3182	10.6881	33.7225		115697898	15.4342	3.57084	6.10358
					115700814	16.441	34.3897	16.7669		115714799	25.1217	165.886	88.6539		115698568	0.207844	0.001	1.40399		115700580	30.7282	5.00187	14.4608		115697935	13.6845	0.001	3.95198
					115700836	9.96052	61.9531	11.5171		115714846	9.60227	29.1237	21.1719		115698574	0.814121	0.91763	22.12		115700605	33.9426	7.42058	24.1647		115697942	11.4252	0.268363	3.65746
					115700848	33.8681	94.233	31.8949		115714921	3.91133	13.4903	13.3224		115698586	0.439045	0.854212	28.9375		115700607	15.4397	0.001	10.1536		115697954	322.664	68.646	111.55
					115700896	10.9771	33.0994	11.107		115714951	8.96797	44.3289	21.8943		115698592	1.6005	0.186587	2.26524		115700619	70.4365	12.8634	38.3538		115697955	46.5503	20.3492	22.4049
					115700903	44.4773	84.2886	3.84642		115715078	2.05922	5.19572	5.48179		115698595	0.266874	0.001	1.06919		115700641	4.6894	0.298926	4.46501		115697959	2.82726	0.001	0.001
					115700650	15.8721	160.299	21.2481		115715124	4.21097	11.1453	12.0199		115698596	6.49902	0.184191	9.81818		115700659	35.9096	8.60264	25.9798		115697967	2.08173	0.001	0.0112203
					115700962	59.1827	305.781	58.3461		115715187	6.00518	14.8951	20.082		115698617	0.187214	0.001	1.88943		115700663	424.011	134.494	291.344		115697972	134.898	45.8502	59.6322
					115701000	3.70445	22.1109	1.92424		115715226	0.701423	5.62091	7.10806		115698618	11.6052	3.46966	15.6563		115700677	126.181	38.8211	80.3104		115697984	344.918	86.0179	108.587
					115701008	0.768171	15.0685	0.373086		115715297	0.10606	3.42141	6.03109		115698635	0.0554263	0.001	7.40255		115700686	20.132	3.69748	10.0379		115697995	94.0541	45.7672	45.898
					115701009	19.558	55.9414	10.7708		115715651	34.4005	196.085	87.574		115698648	0.001	0.001	2.58982		115700705	1.38777	0.001	1.5674		115698008	8.89973	2.51187	3.14242
					115701011	0.613509	2.20448	0.0237587		115715667	0.965703	11.5086	8.12676		115698657	0.0908873	1.22047	7.32384		115700715	135.304	41.7009	162.269		115698016	27.7745	2.26677	5.96808
					115701050	141.779	531.178	118.671		115715704	1.4141	13.1487	10.0548		115698662	0.425562	0.844607	2.39459		115700776	22.761	6.34303	22.6795		115698017	6.4626	0.0435387	0.0149837
					115701058	4.6716	11.3614	0.467968		115715741	0.598674	2.25928	3.36679		115698672	0.103074	0.080155	2.57305		115700786	22.7407	5.08647	15.1361		115698028	1.04989	0.001	0.001
					115701095	9.71709	52.2894	5.60041		115715742	0.0644713	1.22653	1.25835		115698674	1.7454	2.47718	13.9916		115700799	3.59337	1.22829	2.77027		115698030	84.8947	31.9344	4.21999
					115701115	14.4603	18.797	6.21849		115715768	0.133141	0.847898	0.739559		115698715	0.527685	0.730734	2.11155		115700802	90.1321	18.7884	49.3014		115698033	9.01217	2.36977	1.06622
					115701116	6.94964	52.9979	7.40857		115715911	4.27922	12.115	14.247		115698739	4.33218	1.60348	5.35702		115700824	55.1797	13.7611	31.2812		115698039	9.05358	0.121047	0.134439
					115701179	1.6827	10.0722	0.221879		115716003	0.124442	2.57259	3.58113		115698740	2.71819	5.38726	16.3621		115700847	154.569	55.2557	123.947		115698046	21.562	7.86235	8.001
					115701190	8.51993	48.0966	5.22412		115716060	83.6113	387.864	311.96		115698745	0.581452	0.486002	1.39955		115700849	29.4055	12.3199	30.3845		115698047	4.5896	0.0373747	1.47602
					115701208	3.41342	8.64483	3.30779		115716096	2.76403	8.73781	7.52579		115698755	1.67736	0.965776	12.3126		115700866	16.3609	1.89709	15.5453		115698049	1.9513	0.0603387	0.716808
					115701215	3.00665	38.3045	6.96365		115716154	6.16124	16.4203	14.3122		115698757	0.232195	0.175894	1.57702		115700873	13.8971	0.365131	9.94038		115698065	18.2353	3.21728	6.73589
					115701236	37.126	47.6084	13.3287		115716158	9.34337	39.2201	20.9061		115698770	1.66188	1.7699	4.37082		115700879	20.9465	6.4325	18.8279		115698067	0.983651	0.001	0.001
					115701239	14.5615	45.9824	8.05451		115716235	11.5852	23.5634	30.2627		115698784	0.961172	0.019035	2.45821		115700882	2.8177	0.692184	2.28979		115698070	36.2615	13.0489	4.69607
					115701247	305.441	614.153	13.1271		115716339	4.08744	14.7741	12.8732		115698797	0.1295	4.03197	14.9288		115700895	8.81273	2.31962	6.75684		115698074	10.0933	0.718743	4.00208
					115701248	7.85677	59.971	8.55347		115716357	1.8233	10.4545	12.9946		115698798	7.3437	0.585013	11.6626		115700953	9.33338	2.80232	10.5798		115698081	8.9565	2.54502	4.0397
					115701249	15.836	35.142	12.0495		115716397	15.4745	47.7072	69.6499		115698802	1.0949	0.296774	1.98049		115700980	31.8351	8.55717	32.1053		115698088	1.01817	0.466394	0.470309
					115701281	33.6036	92.1461	17.7434		115716412	2.69507	9.15643	7.89687		115698803	1.37126	0.965417	6.09991		115701006	99.1316	27.4092	80.1179		115698089	19.8262	9.92259	3.64588
					115701285	11.3737	33.9206	5.31506		115716446	2.34726	16.3556	22.6153		115698808	0.001	0.001	1.93098		115701014	4.1491	1.19032	2.79107		115698095	162.889	54.9153	57.0504
					115701288	38.8073	110.787	33.5838		115716511	10.0383	23.1695	20.9553		115698809	0.44777	0.29598	2.68109		115701100	15.7585	5.83446	17.0687		115698093	6.37167	2.38173	2.91535
					115701300	17.1205	22.0935	0.672485		115716623	9.67619	29.4565	29.9042		115698812	26.6367	62.8094	136.841		115701141	6.33281	2.09622	5.03241		115698132	37.2449	1.19946	5.46357
					115701311	13.8137	104.502	7.6151		115716636	3.03005	6.18547	6.83593		115698821	0.04535	0.001	36.0987		115701148	25.6135	2.93719	12.5635		115698159	100.126	22.7895	40.4476
					115701338	70.6035	97.9508	9.66424		115716639	7.36474	41.0761	45.5888		115698836	0.367974	0.450931	4.29929		115701159	22.1246	8.94065	22.0955		115698164	1.55152	0.0781427	0.140074
					115701361	16.1432	34.957	6.13456		115716692	16.1446	45.8408	47.405		115698841	1.91964	0.37416	36.2641		115701160	8.25304	2.28622	4.89206		115698169	10.1565	0.900018	2.17705
					115701414	81.6912	228.178	24.6803		115716771	1.03429	15.5857	20.103		115698844	0.177916	0.128844	20.6996		115701252	5.69211	0.197082	2.17467		115698170	2121.81	0.229228	2.54645
					115701450	275.289	726.471	48.8588		115716915	4.21296	11.1094	10.8257		115698849	0.267427	0.05617	5.46947		115701267	3.32562	0.001	2.98449		115698185	3.77969	2.23869	0.0790173
					115701459	6.95251	16.9554	4.17472		115716986	5.07115	28.7296	22.635		115698856	0.0234537	0.001	9.64428		115701279	8.37112	1.41212	8.63259		115698190	7.56639	0.157632	1.88305
					115701465	13.7626	96.2975	21.9348		115717001	4.14445	14.9068	16.2352		115698864	4.28274	1.05659	11.468		115701283	1.86931	0.001	0.785665		115698199	4.61885	0.0477933	0.001
					115701466	67.2187	101.201	25.7111		115717049	0.335586	2.46985	2.67827		115698870	1.30786	0.001	3.78514		115701293	7.83414	1.50982	8.49946		115698218	4.71298	0.0765913	0.41025
					115701498	32.8306	278.152	32.2544		115717091	22.9051	78.3155	57.262		115698881	0.11588	0.380438	4.14983		115701310	7.45918	2.62412	6.51326		115698223	13.6248	0.240471	2.09664
					115701503	0.50506	1.04602	0.00472333		115717092	2.21334	10.9059	7.55902		115698891	1.67445	0.577912	38.121		115701319	2.95675	0.425346	3.29849		115698236	1.77607	0.0495873	0.0722293
					115701515	20.9171	31.171	2.91122		115717105	3.35544	80.5681	54.4639		115698916	0.185721	0.0372167	1.98058		115701346	22.1646	0.263192	14.6472		115698237	25.4821	2.20988	2.64747
					115701518	9.29858	28.9145	11.8137		115717117	9.88879	25.1616	24.3114		115698918	0.001	0.001	0.892901		115701362	20.6339	5.67988	19.8791		115698238	29.3914	0.001	0.001
					115701571	5.7326	11.36	2.23095		115717309	14.775	71.2749	42.262		115698919	3.08133	0.498037	7.44699		115701382	52.695	7.63548	47.5562		115698250	65.7843	20.911	30.8676
					115701577	2.06969	19.2065	5.31443		115717483	1.05859	8.77366	8.64451		115698925	6.26579	1.95096	21.9145		115701404	27.3051	9.35292	22.0683		115698258	2.19786	0.001	0.274317
					115701578	24.7779	43.1163	4.13105		115717484	0.491645	2.78827	3.86877		115698934	0.148722	2.17038	8.83772		115701406	8.71342	1.9735	6.46977		115698268	6.46753	1.91502	3.03613
					115701586	11.6296	52.7935	4.93815		115718111	0.0249557	3.80891	2.05769		115698954	0.368411	0.067348	0.743608		115701409	6.74849	2.47493	6.64208		115698272	18.9324	1.64031	3.10154
					115701640	6.58664	36.0413	6.69626		115718418	17.8826	42.2382	41.0149		115698955	2.75985	1.15175	7.29452		115701415	4.40405	1.11992	2.81047		115698271	11.8429	2.44963	2.80302
					115701777	17.7563	46.7232	7.08098		115718472	23.3248	50.017	65.8592		115698957	3.31964	1.04785	4.29445		115701436	7.03531	2.59874	6.59994		115698278	54.5237	19.6463	21.7098
					115701809	10.857	35.6516	3.30255		115718758	0.935327	1.92438	2.00225		115698964	4.07525	0.281315	27.2679		115701438	16.4259	2.83354	10.3784		115698280	21.6435	0.001	1.8897
					115702104	9.75831	10.9618	1.24588		115718897	3.84686	30.355	17.2323		115698966	1.76342	1.81594	26.5449		115701443	9.38964	2.35818	5.34309		115698281	8.67456	2.88965	1.59584
					115702326	19.8388	49.878	5.29313		115718941	5.82113	19.2025	15.0473		115698967	0.379392	0.386221	2.4175		115701452	1.32321	0.001	0.936628		115698283	11.0149	2.92744	3.79799
					115702328	0.372655	1.42901	0.390249		115718954	2.42535	21.8053	12.6595		115698978	0.242274	0.0821303	23.6608		115701481	3.17827	0.163002	2.327		115698285	31.7734	0.875846	6.70207
					115702330	4.00801	11.3719	3.34587		115718987	10.0642	20.9923	20.271		115698991	5.5005	0.0381333	11.8324		115701489	15.9355	6.40183	16.6747		115698289	34.2184	3.06322	7.38694
					115702338	4.42668	25.2523	7.07437		115719059	3.32965	12.1677	8.41884		115698989	4.49654	9.11877	30.7034		115701536	2.03576	0.540163	1.32733		115698303	189.82	50.6069	21.3429
					115702344	22.8461	53.9341	14.7428		115719082	10.2285	20.6306	25.4838		115699008	0.119131	0.001	2.01933		115701546	15.7268	2.55723	7.52464		115698306	1.37211	0.001	0.103545
					115702361	90.4144	351.617	22.6526		115719098	26.9325	55.0196	73.7365		115699036	0.001	0.0949863	3.31329		115701693	22.8164	4.36745	12.5078		115698312	3.43707	0.001	0.406412
					115702372	36.1111	142.089	10.4902		115719101	21.0666	42.1637	43.0044		115699086	49.3901	59.4436	144.427		115701709	11.8928	0.308211	12.0043		115698313	5.83822	2.31812	0.848825
					115702383	4.98008	6.14916	1.34003		115719095	0.855666	7.09787	9.96363		115699111	9.03065	3.09962	11.8995		115701945	26.6233	7.38861	27.5878		115698319	7.53446	3.53797	1.46991
					115702389	1.83868	23.3367	1.08756		115719204	4.0707	11.1193	9.10146		115699113	20.8032	7.34522	25.0006		115702055	21.7491	0.269571	21.2281		115698325	37.5527	11.0022	14.2488
					115702395	14.8373	33.2023	1.78244		115719231	11.1179	98.2138	50.2756		115699126	17.0429	7.6536	30.2706		115702316	1.59798	0.187084	1.39857		115698339	5.87757	0.692518	1.20418
					115702425	2.53738	11.2185	0.256518		115719242	12.0163	47.5351	30.8818		115699137	55.0589	23.2958	153.284		115702335	29.3427	13.0164	33.3997		115698388	46.9035	19.9525	1.01936
					115702507	29.27	47.8013	5.3722		115719254	6.85623	46.2495	48.6913		115699142	16.4377	7.92497	22.7796		115702342	11.6226	2.82435	11.9017		115698387	49.2714	22.6869	21.026
					115702588	3.23872	35.3659	3.4045		115719277	21.0338	48.4512	53.9306		115699151	14.6011	12.1456	81.8934		115702345	72.2395	16.37	37.2342		115698494	8.14844	0.001	0.0402327
					115702651	47.6403	118.417	8.31776		115719318	9.03329	41.0234	33.8287		115699161	42.2637	114.182	209.461		115702376	18.1781	3.53669	13.182		115698496	15.814	1.94112	3.35144
					115702667	131.971	330.408	70.3338		115719363	0.844042	4.09756	5.67731		115699179	0.378865	0.001	4.22609		115702382	27.0566	3.48699	28.2855		115698497	10.9276	2.69766	0.39199
					115702678	8.34539	19.9297	5.94618		115719388	24.9775	55.1427	60.7553		115699196	7.05196	9.30971	20.1216		115702472	1.70945	0.001	1.18697		115698501	3.29355	1.01078	1.43512
					115702697	7.60224	35.7776	0.957703		115719433	26.4504	72.5853	69.0372		115699254	295.134	146.482	363.83		115702569	10.5933	2.04551	5.38649		115698546	5.01033	0.001	0.489769
					115702730	4.50176	10.5577	4.24		115719453	22.7208	56.9685	66.2562		115699268	7.31178	2.59934	10.2027		115702602	7.60791	2.93595	6.17363		115698549	21.0501	0.150294	5.32787
					115702763	4.76152	23.4881	1.26792		115719491	2.73024	10.7501	11.0373		115699273	1.90521	0.632337	10.2118		115702617	3.3568	0.936584	2.20393		115698548	62.3865	28.1335	29.157
					115702780	82.1071	362.345	30.7943		115719526	0.538391	2.4795	1.31593		115699298	69.9581	35.9899	142.148		115702620	9.64238	1.61093	10.9188		115698583	4.86643	2.3836	2.35196
					115702804	136.273	605.282	53.3895		115719542	7.89672	59.6981	57.4821		115699320	3.52969	0.637202	5.00755		115702629	10.2394	1.39913	12.1506		115698585	7.94298	2.18533	0.42408
					115702815	61.1224	189.717	18.5848		115719652	8.25229	24.838	20.5624		115699332	2.34409	4.08174	10.452		115702654	18.3509	2.7955	16.5751		115698587	11.8421	1.86516	2.76445
					115702857	12.823	38.5991	14.5195		115719946	3.81602	11.9209	12.8968		115699354	14.976	30.1321	47.8063		115702657	20.6115	5.08511	16.2483		115698589	3.54319	0.001	0.177313
					115702879	10.8096	36.0975	16.9924		115720122	1.36234	3.82545	5.09873		115699364	8.33678	7.27462	66.3067		115702668	5.5126	0.001	6.18849		115698594	2.42458	0.522739	0.666357
					115702886	0.406275	1.92212	0.0163613		115720572	1.89054	8.71276	5.6416		115699381	0.399573	0.899137	4.29898		115702716	15.6748	2.5791	9.16479		115698599	0.952774	0.001	0.00999733
					115702892	10.8917	39.227	17.0968		115720651	11.0905	42.7126	39.5822		115699387	1.34075	0.234986	3.0757		115702721	12.5301	2.04372	6.96221		115698602	43.72	1.91717	9.90466
					115702898	27.9975	120.438	21.7443		115720788	2.05295	27.6426	24.2521		115699393	18.2593	25.399	145.819		115702729	1.6124	0.179077	1.39175		115698619	13.3106	4.41028	5.60512
					115702903	4.96415	7.87019	1.69351		115720531	0.709419	7.1148	8.38917		115699406	9.76982	12.7799	44.3515		115702731	43.1559	2.01775	22.4307		115698623	63.1542	14.0161	22.9978
					115702935	36.3051	96.0971	25.2877		115720836	34.1062	116.092	89.5761		115699407	8.23426	9.60767	21.6841		115702732	26.5672	1.35168	12.8857		115698626	7.42341	0.156687	0.86521
					115702949	7.77981	138.08	26.463		115720961	21.0624	64.9715	96.7657		115699420	10.8672	1.02672	20.5128		115702743	1.22313	0.436489	1.25497		115698651	3.40422	0.001	0.186351
					115703001	15.7034	46.6703	3.68227		115721204	0.339015	24.6065	20.7463		115699427	991.722	462.122	1232.03		115702759	81.8342	7.38074	36.8769		115698654	9.91113	2.62312	3.92561
					115703002	36.9235	105.408	11.5273		115721238	1.59332	5.40384	4.04334		115699452	3.1845	0.484463	9.70583		115702771	11.3661	4.283	13.1607		115698660	21.4396	1.69438	0.69263
					115703020	0.341206	15.1192	0.256287		115721264	6.5896	20.197	18.1475		115699453	4.10966	0.001	127.525		115702829	1.35939	0.497572	1.37846		115698661	30.2643	0.0778317	0.205894
					115703051	11.0545	38.5993	7.08062		115721274	0.113773	11.1186	9.19104		115699458	0.880584	0.185151	2.09883		115702855	14.1886	2.91893	10.4192		115698667	54.3786	2.83704	3.76087
					115703114	11.5405	51.2966	13.8771		115721278	19.4475	53.4539	60.5691		115699459	9.30183	21.6775	32.7356		115702925	6.8337	2.23251	6.80464		115698698	25.4456	10.7974	8.46964
					115703129	11.3809	15.4256	4.45349		115721418	4.1416	10.5915	13.0787		115699466	37.7356	12.8603	50.1202		115702932	7.0697	2.32898	7.13658		115698701	80.8797	1.09486	0.688827
					115703131	12.2879	52.9859	15.1324		115721754	1.45629	7.5484	11.8789		115699475	21.7567	10.4123	26.868		115702942	10.7616	2.83205	7.1813		115698706	9.58563	0.10482	0.108937
					115703134	18.7886	28.0188	2.50098		115721783	1.69854	17.0254	20.6491		115699476	19.107	11.9876	72.809		115702950	21.3996	1.85532	15.9355		115698708	8.15785	0.138835	0.608428
					115703161	5.77451	17.3145	2.52224		115721804	0.498625	4.80068	4.31897		115699477	9.10965	7.80927	25.4127		115702972	12.2323	2.14964	14.1977		115698717	15.7368	4.48885	0.0622917
					115703202	215.32	467.433	24.3602		115721825	76.9443	277.837	185.913		115699479	22.0967	28.8915	81.4902		115703006	13.3825	2.77773	15.4482		115698725	38.8566	6.03714	2.65749
					115703200	54.8245	286.121	49.7258		115721832	9.42571	25.9776	24.8156		115699478	0.460685	0.001	4.67878		115703037	11.7298	4.47198	12.4905		115698729	15.5557	2.94672	0.219332
					115703236	10.7902	34.7119	7.58531		115721882	0.460395	2.58209	2.09106		115699495	3.68562	4.20479	9.05274		115703083	5.0157	0.634605	5.27155		115698743	10.7719	1.59344	3.38498
					115703528	14.2897	26.038	5.44294		115721940	0.195165	5.25049	3.57643		115699499	1.86998	2.01725	12.2902		115703117	1.39956	0.312295	1.13101		115698742	1.03668	0.0420273	0.001
					115703561	1.59678	4.96635	1.16963		115721967	85.66	345.168	193.386		115699505	0.41395	0.001	6.0624		115703119	12.7896	3.78566	14.2046		115698747	2.26017	0.001	0.151737
					115703576	18.5328	42.3005	15.4165		115722116	6.56863	18.1155	20.1292		115699514	1.44164	1.10492	7.74277		115703120	25.135	7.45441	27.0836		115698764	1.38429	0.370864	0.0733867
					115703582	15.68	291.16	33.9485		115722123	368.136	2247.58	3729.08		115699541	60.8108	53.9008	133.656		115703145	13.6391	2.89185	16.8426		115698765	6.04736	0.0807113	2.04559
					115703620	8.58519	17.9628	8.76536		115722305	38.9261	157.198	86.8418		115699573	16.1756	1.20701	168.251		115703157	3.35277	0.488577	1.84973		115698766	43.068	23.4249	6.01602
					115703656	83.9114	196.515	24.1827		115722425	10.8445	82.9863	39.0912		115699581	5.40641	2.20902	12.9273		115703158	2.31189	0.721326	2.77459		115698779	1.68395	0.0303853	0.0125933
					115703728	23.7648	31.2691	11.2129		115722499	19.9413	52.8448	44.1015		115699598	38.4312	17.1171	62.3421		115703228	14.0506	3.6854	7.69516		115698780	6.76752	4.02116	1.6725
					115703736	4.51305	74.4034	18.5732		115722520	17.9517	59.4633	67.7749		115699600	38.5349	18.5921	59.1437		115703241	13.1413	4.28058	11.4198		115698781	10.1298	4.71873	4.64191
					115703767	0.835293	4.33807	0.993166		115722668	0.63305	3.85853	4.01999		115699605	6.57019	3.7716	27.0703		115703342	74.2953	17.8065	70.901		115698791	28.8088	2.3304	4.84381
					115703842	3.29074	9.36487	4.21297		115722669	0.270689	9.72305	4.01693		115699613	97.6527	61.9845	259.045		115703420	2.7663	1.02905	2.38602		115698811	11.5888	2.25588	2.74933
					115703922	7.4786	16.4653	3.29669		115722670	0.865629	7.20316	5.7808		115699625	3.78419	1.88563	7.41289		115703452	11.6433	2.98681	7.66145		115698813	7.04791	1.74076	0.780814
					115703930	9.46439	22.0294	10.1957		115722699	3.53951	33.1022	35.0781		115699656	7.91243	3.5788	10.6162		115703562	4.77769	0.107416	2.57912		115698819	4.63992	0.461504	0.426803
					115703954	4.1285	14.8655	0.194857		115723068	0.619885	3.1124	1.79449		115699679	0.631106	0.154192	3.46671		115703569	0.980035	0.0214597	0.531094		115698822	3.08732	1.31034	1.22068
					115704012	30.4172	88.3331	10.6043		115723102	20.1076	52.8582	40.8393		115699684	15.1531	1.5402	185.916		115703577	9.95599	3.31478	10.8371		115698839	1.67779	0.109526	0.114093
					115704022	1.82414	21.7598	6.05246		115723126	14.195	35.9332	29.2567		115699693	0.33198	1.90283	6.04652		115703598	15.3861	2.28626	8.27875		115698840	2.63908	0.097822	0.144603
					115704044	71.7318	86.1091	5.47738		115723182	4.95132	29.9202	17.5879		115699694	64.7956	207.25	334.507		115703610	2.2929	0.240465	1.44047		115698848	8.82252	0.001	0.357688
					115704094	12.3019	24.4572	1.44374		115723285	7.26429	29.6197	19.3983		115699702	1.31873	0.141348	7.04145		115703619	44.5246	13.5602	28.9411		115698855	5.86935	0.303698	1.54321
					115704108	10.4699	24.8066	1.65435		115723363	1.99836	4.09523	4.36508		115699720	9.73631	3.61566	12.1547		115703637	1.59099	0.462834	1.00086		115698878	6.86774	0.151069	1.3138
					115704140	14.8217	31.8737	1.95403		115723447	4.1433	19.8276	13.3577		115699729	1.32218	0.316532	2.0976		115703642	26.0259	0.844469	14.2873		115698885	13.8597	1.70587	5.50783
					115704169	11.0704	37.9822	12.8554		115723477	23.4624	49.1813	57.9836		115699730	4.81031	2.02664	8.86565		115703643	1.27137	0.200826	0.848622		115698889	1.9027	0.022998	0.158246
					115704224	103.073	765.404	28.1798		115724089	9.57812	20.575	29.4986		115699728	0.782039	6.60687	23.2418		115703644	0.832182	0.001	0.570732		115698901	259.602	0.0212053	0.77752
					115704245	1.42944	4.7823	1.22941		115724110	1.96364	15.4991	14.659		115699764	4.1476	4.01708	20.7546		115703653	7.91338	1.91271	4.14456		115698904	1.17355	0.113757	0.060345
					115704249	13.5221	46.262	16.7962		115724117	2.51683	8.76128	5.2768		115699768	13.6799	6.83657	18.172		115703673	15.1647	5.106	11.6612		115698907	2.55469	1.07925	0.800428
					115704335	0.227913	2.29896	0.001		115724185	3.77915	90.7343	105.293		115699774	0.974191	2.07941	7.64791		115703688	57.7053	20.4412	41.5043		115698911	92.4353	0.645603	11.6371
					115704418	2.7411	12.7909	2.36956		115724611	7.1659	15.3008	16.0622		115699794	0.001	0.001	2.26628		115703705	3.80487	0.761451	2.85364		115698937	1.67251	0.001	0.341817
					115704458	3.38532	9.51089	2.67856		115724729	1.4055	5.20501	4.40874		115699857	9.17711	11.5626	29.4989		115703759	10.5348	1.39566	11.9553		115698945	10.6267	0.001	3.54141
					115704464	0.703967	22.6859	0.521892		115724851	1.02648	5.55129	4.85258		115699864	19.1635	37.8038	75.8414		115703836	1.19189	0.001	0.426437		115698956	142.202	35.4481	67.1132
					115704506	100.894	448.58	108.659		115724873	0.472279	1.9899	2.59595		115699904	25.984	3.05143	46.1152		115703908	8.63782	3.5591	8.47288		115698960	1.42382	0.383379	0.075738
					115704538	0.364835	3.18347	0.558071		115724950	17.0145	40.9785	46.9553		115699955	0.0193567	0.0314787	9.95187		115703950	10.795	3.31707	8.64529		115698969	2.39084	0.012255	0.0165993
					115704620	40.7736	267.499	23.4039		115725003	55.4845	167.531	117.092		115700067	150.89	305.682	466.065		115704008	33.3085	4.95625	19.4143		115698982	24.4505	1.22415	2.03607
					115704681	3.80439	12.1875	0.369498		115725012	9.71611	40.7042	33.3468		115700212	0.392799	0.161241	0.900898		115704104	8.79894	1.35258	9.11326		115699003	44.0984	15.8614	12.4475
					115704727	2.94099	7.84715	1.58078		115725053	7.18807	66.6193	39.0836		115700226	0.127169	0.001	18.694		115704122	45.8993	10.4407	34.1004		115699015	47.7487	0.001	0.001
					115704770	50.4204	95.9214	13.9577		115725163	0.85908	25.8966	38.9019		115700273	2.58037	0.414029	16.4215		115704238	2.10668	0.21826	2.02628		115699017	1.52222	0.219989	0.001
					115704800	1.88349	3.33818	0.434814		115725213	14.5343	32.7626	36.6623		115700277	0.341028	0.385104	4.24097		115704221	7.96648	3.751	7.53463		115699020	24.4223	0.001	0.0161123
					115704803	0.0982057	5.6463	0.787496		115725247	23.9005	54.4951	70.4064		115700278	4.85893	1.29248	14.2718		115704344	27.9692	10.9735	31.0308		115699041	1.80102	0.001	0.056941
					115704804	0.448565	9.74051	2.6899		115725315	10.0718	22.0436	29.8833		115700299	0.343752	0.578951	7.74746		115704372	2.51931	0.0289943	1.33501		115699046	9.54746	0.090875	1.36831
					115704824	3.08912	6.57623	2.12431		115725319	13.5802	157.743	80.879		115700309	4.8834	3.70542	12.7374		115704489	4.51195	1.84282	4.53894		115699054	68.1847	1.06764	3.45783
					115704828	2.27718	50.0594	1.44964		115725384	0.679779	1.83042	2.82148		115700336	1.08404	0.0834543	9.05293		115704556	25.775	4.37002	23.5123		115699056	31.2086	9.76648	2.17276
					115704830	0.739051	3.94576	0.402276		115725392	18.833	148.907	140.986		115700356	10.7478	17.279	35.9067		115704558	2.46274	0.001	1.6482		115699079	22.3214	1.62205	2.19857
					115704893	28.8336	115.061	17.7368		115725443	1.82875	8.19662	5.79351		115700361	17.2946	26.9842	58.7544		115704581	2.46492	0.664641	1.82643		115699091	26.9653	1.2264	9.0805
					115704897	17.4096	73.4378	5.99741		115725565	0.206269	0.884449	0.498035		115700416	0.464793	1.89896	5.16918		115704586	2.15642	0.001	0.920403		115699101	6.07965	0.0401723	0.166838
					115704903	304.068	1249.36	122.486		115725612	7.21337	65.5712	58.057		115700444	18.241	13.0071	36.6823		115704651	142.279	48.2038	138.992		115699114	12.8473	0.0497517	4.02005
					115704930	16.0723	29.828	3.5643		115725712	2.26161	14.0347	16.5987		115700460	81.9734	24.4711	266.561		115704660	1.46982	0.040322	0.809706		115699115	38.4518	1.0077	2.7152
					115704957	37.0988	97.2289	9.85452		115725714	4.83024	50.9662	25.223		115700482	8.18533	1.11928	10.9735		115704673	100.469	36.2828	100.321		115699118	6.6757	0.001	0.30947
					115704965	0.903527	2.97809	0.716301		115725784	1.91542	4.12626	5.07152		115700485	19.9938	5.25051	34.4897		115704680	1.39388	0.264435	1.17907		115699125	18.7304	0.399699	2.69114
					115704970	9.58071	20.1651	1.31913		27215476	161.316	323.704	413.118		115700486	0.612748	0.055604	1.03423		115704759	8.97013	4.11674	8.40303		115699134	1.59399	0.001	0.001
					115704971	31.7392	177.473	28.3676		115724820	2.91085	8.3535	6.67926		115700493	3.34138	2.47226	8.71689		115704775	1.8015	0.354495	1.26214		115699139	78.3802	1.54166	0.362433
					115704992	1.43826	2.99302	0.66393		115721161	0.138861	3.81907	2.65285		115700518	39.2794	45.2607	103.963		115704825	2.60778	0.416665	1.77517		115699148	11.3536	0.065809	0.0181827
					115704994	6.43552	50.9906	1.17773		115706774	2.49438	7.25245	5.68954		115700520	9.91938	5.97709	23.448		115704846	2.86475	0.209306	1.87393		115699153	18.4258	0.657243	1.12603
					115704997	0.102993	1.60177	0.0836263		115698854	0.29516	2.10128	1.49569		115700521	5.35774	4.919	12.7566		115704899	7.25515	0.103923	2.92434		115699160	28.3508	0.226061	2.92864
					115705010	29.5145	62.851	6.68542		115713144	0.019234	12.4088	6.82323		115700547	15.6952	10.494	132.21		115704918	1.90299	0.135601	1.58814		115699159	2.06526	0.093935	0.44774
					115705026	38.1915	61.8752	10.0554		115723286	2.25869	9.54871	6.37066		115700582	2.04318	0.276514	4.31886		115704947	7.0611	1.88667	7.4002		115699168	139.551	10.7767	32.9231
					115705027	4.28714	14.6897	4.03016		115710133	0.200422	4.03403	2.91865		115700594	0.370055	1.08043	3.36379		115704991	1.2484	0.001	1.27482		115699171	75.3184	16.947	29.8859
					115705036	3.67689	11.3831	0.235003		115712300	0.805336	2.97166	1.89635		115700623	4.89612	2.62947	21.9979		115705047	0.921259	0.001	0.696215		115699172	16.15	2.61319	4.64291
					115705080	9.95614	21.8043	5.778		115698077	0.658996	3.42932	4.13572		115700637	3.26428	0.480204	9.39635		115705067	102.958	8.26277	56.948		115699173	0.819056	0.144317	0.0458067
					115705090	0.880529	4.90583	0.035907		115709929	2.06783	4.91467	5.49318		115700645	10.2192	3.29198	15.2321		115705104	3.91756	1.37933	3.49639		115699199	1462.18	271.878	19.6003
					115705120	11.8816	74.883	10.9476		115721269	1.68348	10.6133	11.8001		115700652	1.56025	0.59986	5.26582		115705118	41.1484	13.0249	32.3145		115699218	17.8041	0.0690217	3.39761
					115705125	31.3046	103.009	39.353		115709211	0.990728	3.47115	3.86779		115700662	3.30077	2.37505	7.61965		115705141	10.2547	1.9527	6.65452		115699192	55.4691	25.059	24.1679
					115705156	24.0694	93.0492	13.7186		115721987	1.07131	2.83331	2.60625		115700665	3.63476	0.001	55.833		115705151	1.48934	0.0513633	0.63713		115699220	49.0498	25.8032	5.70851
					115705138	4.24156	11.2907	4.22855		115725644	1.18233	3.98225	3.64358		115700666	8.26108	9.39954	20.1707		115705162	84.1679	30.4836	93.0795		115699225	2.08265	0.001	0.001
					115705166	38.4422	120.615	16.3128		115718720	0.630297	3.40711	3.16469		115700667	144.892	38.052	492.784		115705194	12.9699	3.30058	14.9509		115699242	34.1964	21.0741	3.37598
					115705186	31.468	75.7405	22.0719		115714711	1.02262	6.96755	6.31046		115700669	0.521779	0.444917	2.15707		115705198	23.6199	5.78852	14.3353		115699243	9.05941	4.2575	3.69557
					115705220	17.9489	39.2464	6.21928		115715705	1.54261	3.5276	3.30825		115700700	1.16455	0.090315	7.73321		115705245	67.2747	23.9903	61.813		115699267	135.097	9.9965	12.5222
					115705224	36.2299	176.678	47.8391		115705216	1.0267	7.53558	7.34576		115700725	7.62535	2.12411	49.1549		115705248	81.3826	37.9542	88.1189		115699278	28.7243	2.86342	0.67012
					115705236	4.42344	7.30764	1.60752		115696845	1.38021	5.02031	4.87385		115700731	5.0937	4.83526	14.9722		115705249	9.58258	1.82513	5.81384		115699292	3.84913	1.73657	0.050571
					115705222	19.9603	790.452	206.224		115705124	0.0141667	0.970291	0.914408		115700747	3.06256	9.29336	16.2675		115705252	11.2077	4.44899	9.23287		115699293	113.627	0.138579	0.001
					115705266	1.70499	33.2576	0.816132		115698979	0.373706	1.70369	1.63056		115700768	0.001	0.001	2.73508		115705253	114.667	45.919	95.3724		115699296	15.8758	2.01857	6.11668
					115705278	5.68433	31.9287	5.03402		115706979	1.46092	4.74549	4.50206		115700771	6.22681	1.86158	48.6221		115705254	358.108	131.331	326.191		115699297	317.48	2.38485	32.9428
					115705285	27.6474	47.8715	12.2439		115702523	0.791608	2.02772	1.9398		115700772	9.75611	1.13575	16.2793		115705272	55.5873	9.64736	49.4953		115699314	5.77154	1.11953	0.250364
					115705323	39.8693	192.867	41.2976		115694717	11.0334	24.3235	24.4569		115700775	4.14174	5.49374	32.2396		115705274	44.8024	18.0469	36.8868		115699318	4.81687	0.28411	0.41965
					115705299	26.264	132.769	23.8498		115705972	0.785434	1.99324	2.65809		115700781	0.0273887	0.001	0.92035		115705295	11.1705	1.57243	12.6221		115699319	6.0995	0.9552	2.00984
					115705339	17.8485	73.1546	19.8108		115714479	124.636	449.716	657.869		115700821	5.27378	2.19557	29.9016		115705296	41.6745	13.8208	29.4516		115699323	162.13	0.0973167	0.45684
					115705395	21.2537	47.2896	5.57865		115703806	0.920977	1.89463	2.29793		115700834	8.62326	10.9807	30.4752		115705320	7.71022	2.41063	5.30598		115699328	7.67026	0.223588	2.66291
					115705435	41.3358	179.95	39.1383		115713057	0.207479	1.96377	2.67183		115700869	0.779405	0.133438	14.8358		115705324	32.1184	10.0012	30.1878		115699347	1.2328	0.001	0.0423647
					115705438	24.2773	67.1186	12.1711		115711220	0.040468	0.906387	1.22683		115700872	2.44537	0.320541	5.11405		115705337	1.38866	0.001	0.613397		115699351	3.39084	1.05078	1.15472
					115705453	42.8534	503.747	74.2071		115724216	6.56497	23.421	16.0709		115700902	25.6397	7.42001	149.476		115705350	28.2285	1.34994	12.6938		115699357	28.4646	4.19567	9.0291
					115705459	21.9423	65.6474	24.4677		115717667	1.44614	4.37749	3.17113		115700908	30.231	14.3078	82.2607		115705378	11.1543	5.34177	11.7277		115699358	429.328	129.469	189.3
					115705500	11.8017	41.9689	4.94326		115698535	0.318561	1.61702	1.3842		115700918	3.44332	2.1845	9.67252		115705382	8.09479	0.923368	5.11608		115699377	61.3588	20.9032	27.927
					115705519	10.3845	35.3143	11.3909		115710295	1.17882	5.29777	4.10282		115700928	8.03013	3.79655	41.0941		115705405	8.20352	2.33568	9.02344		115699384	77.1131	0.001	0.837137
					115705531	1.04503	3.55733	0.897404		115700915	7.45091	32.4819	19.3762		115700934	6.55576	18.8371	58.1491		115705417	226.578	43.7902	193.793		115699396	16.3471	1.50649	0.197981
					115705559	0.121772	4.00963	0.15948		115725233	0.160416	2.47669	1.12377		115700948	4.02173	5.83003	15.1184		115705430	168.565	39.7286	175.661		115699402	22.2588	4.62525	3.06867
					115705563	9.88524	83.3249	7.3276		115725231	0.230682	3.36708	1.30792		115700949	2.46967	8.24294	15.2887		115705477	0.96108	0.3275	0.818691		115699410	12.3936	1.4271	4.6544
					115705581	82.4429	181.442	8.35615		115701567	0.202361	4.0692	3.72376		115700952	32.5264	17.1281	174.813		115705481	9.57976	2.63233	10.5561		115699411	90.1247	28.2197	42.9987
					115705582	14.3391	65.0141	24.9202		115716891	3.05305	10.2484	10.0222		115700961	24.5781	7.38793	348.266		115705483	122.025	30.8762	130.106		115699421	25.7035	6.52748	4.56883
					115705586	50.9999	132.359	3.99843		115720595	3.24597	8.54578	8.27564		115700964	0.500905	0.432616	9.90517		115705493	53.7472	16.8608	38.5599		115699432	34.632	0.748257	1.11304
					115705594	41.9631	74.2321	5.78894		115716854	0.183429	1.02166	1.56495		115700981	0.001	0.001	1.52738		115705509	39.0352	11.7404	28.7684		115699442	18.8636	4.73231	8.97741
					115705596	161.901	369.634	130.679		115724834	2.23775	5.76183	7.23171		115700987	0.415856	1.93485	73.6488		115705520	14.6688	3.70745	11.8944		115699451	47.7686	0.314536	0.276926
					115705598	110.585	244.854	90.0741		115721703	5.41511	13.1348	16.3759		115701027	6.42016	2.8051	27.0076		115705577	10.6098	1.43689	6.0031		115699472	85.6008	31.4916	30.7792
					115705611	0.553268	1.40388	0.353058		115708667	0.920523	2.62099	3.25316		115701044	21.9948	7.54011	57.3226		115705580	7.6397	2.94352	7.20657		115699482	48.8755	1.50217	7.48417
					115705621	10.1393	32.7138	10.4101		115708484	3.05408	9.88561	7.79979		115701048	2.17726	1.64559	13.9662		115705608	59.6835	28.6499	58.7208		115699487	301.416	69.2382	147.518
					115705635	20.0261	24.0586	8.58003		115701705	1.71469	8.86658	5.84368		115701079	0.120987	0.001	8.24907		115705615	23.7091	6.9436	22.5253		115699485	6.97194	0.65926	0.958545
					115705639	26.6802	30.3036	8.62039		115701706	6.25126	17.5506	14.617		115701076	0.905839	2.67392	34.6669		115705633	12.3004	4.25685	13.724		115699488	69.0953	9.94911	27.2821
					115705672	76.9903	267.056	85.579		115701675	1.43543	9.07292	4.71811		115701104	19.5915	4.34456	24.9648		115705641	10.4711	4.89456	11.1402		115699492	9.51816	0.247485	3.31875
					115705673	80.4413	320.967	102.952		115708497	6.79663	33.3149	15.2001		115701109	1.01419	0.252403	1.40755		115705644	81.771	13.6629	42.6485		115699500	2.87884	0.001	0.122795
					115705677	29.0434	44.1914	4.5139		115718292	0.509471	1.68975	1.94538		115701110	13.2088	8.92755	30.7307		115705671	6.30874	1.0177	3.63016		115699503	12.1085	3.91321	5.45767
					115705680	2.97118	4.43458	0.756693		115718285	7.41745	15.9692	17.0224		115701137	1.10823	0.001	1.51113		115705715	29.9646	8.42134	34.4618		115699504	1.66564	0.001	0.247133
					115705686	13.2759	44.7291	14.2548		115708372	6.71897	22.9571	21.4566		115701153	0.67608	0.86407	1.88805		115705731	9.39136	3.93661	8.58976		115699508	63.9539	18.4167	22.9303
					115705693	17.3042	49.205	12.7373		115701704	3.82493	12.2809	11.9829		115701158	0.995013	0.001	4.74794		115705739	23.7643	2.16304	12.8086		115699523	9.27961	5.47398	1.76876
					115705704	100.711	363.832	160.564		115708428	3.24029	10.0705	9.51061		115701162	31.6379	2.24438	223.629		115705743	13.9623	6.71316	15.6929		115699524	14.6807	7.53747	3.05847
					115705705	15.5648	41.8025	11.4973		115701707	3.43434	11.4192	11.8344		115701174	3.8092	4.35632	11.1307		115705741	11.6186	4.66314	11.2329		115699527	10.6033	3.44882	4.50665
					115705742	8.76705	18.6938	5.52536		115724360	1.50759	4.45718	4.74551		115701182	0.713674	0.254508	1.26762		115705749	3.96094	0.475333	3.07872		115699534	7.00744	3.45984	3.21245
					115705763	24.7759	83.3056	24.5896		115708487	6.22274	13.7278	19.953		115701186	1.4039	0.712379	3.83361		115705790	25.4787	11.2108	24.0876		115699544	12.4008	2.63004	3.49594
					115705772	0.378293	0.977169	0.176681							115701191	2.17032	4.84816	7.3183		115705796	88.6771	18.1456	86.6796		115699545	16.7729	4.15734	8.4617
					115705773	1.84284	3.29771	0.775517							115701196	139.134	23.0579	201.881		115705802	63.6508	8.8204	35.2931		115699555	5.48924	0.542376	0.810444
					115705814	0.808153	1.57268	0.158631							115701206	0.850029	0.206723	11.3868		115705826	9.17579	4.11938	9.08474		115699568	30.1523	2.75333	11.0156
					115705832	247.139	1065.69	143.299							115701228	0.371183	0.55338	12.1302		115705834	10.8667	4.41515	11.1175		115699572	32.4336	12.8006	14.3636
					115705878	17.5953	38.5594	8.51306							115701238	2.00678	0.001	15.9737		115705877	20.5969	5.77506	13.0393		115699589	6.47507	0.519099	1.70196
					115705882	57.9431	165.829	36.0757							115701240	6.24073	4.27389	21.3807		115705933	3.98328	0.994793	4.78296		115699593	6.16085	0.251861	1.49345
					115705883	48.0318	154.68	39.2414							115701243	0.974308	6.17235	21.4917		115705941	20.7534	6.92098	17.2444		115699596	3.07691	0.17711	0.186301
					115705990	8.63857	93.8991	9.30533							115701259	4.89336	3.05469	14.9479		115705988	19.9475	9.17707	21.4831		115699595	52.326	0.001	1.52473
					115705994	20.3867	60.4036	22.4718							115701275	1.31493	4.93536	9.54308		115706024	12.8932	3.54837	9.31144		115699599	36.7619	6.2672	11.2128
					115706001	9.91361	13.4716	3.94787							115701278	12.3526	12.5809	32.0434		115706042	22.8869	6.21996	15.1332		115699607	3.44574	0.151498	0.892115
					115706019	8.07924	16.3514	1.30382							115701282	0.188598	0.295002	1.71771		115706067	30.1584	5.9704	15.5652		115699630	136.676	20.8189	31.111
					115706020	39.6901	141.804	5.46332							115701284	4.70041	17.8115	35.9522		115706077	5.42544	0.621802	2.50974		115699639	436.829	101.243	180.885
					115706084	1.2917	6.68239	2.6868							115701290	0.968657	4.16634	7.008		115706085	7.73214	0.534133	9.39168		115699646	12.2344	0.120698	1.97947
					115706125	35.8193	74.028	16.7254							115701295	0.835071	0.602197	2.48416		115706083	11.3991	0.759254	13.5464		115699664	4.96285	1.53149	1.17621
					115706129	2.64336	8.72086	0.210116							115701306	0.630717	0.001	4.75367		115706094	5.49112	2.64042	5.4067		115699665	55.2501	0.001	0.001
					115706142	17.04	65.7331	9.49335							115701340	41.7758	9.53036	59.6845		115706095	11.6148	4.18793	9.87632		115699669	8.17586	1.92734	3.71729
					115706156	10.7657	44.3821	3.5742							115701353	117.651	164.079	603.718		115706096	4.76468	0.554532	2.26911		115699703	19.9537	0.001	0.001
					115706191	23.6844	108.408	19.3835							115701355	1.36439	0.734499	4.08837		115706130	2.83121	0.293494	2.47452		115699712	9.67587	3.3195	0.001
					115706227	8.805	22.1003	8.9282							115701376	23.9277	22.7732	264.427		115706140	11.498	4.43912	10.285		115699742	11.7078	0.075317	0.767129
					115706229	408.552	590.641	78.8975							115701381	42.744	4.22638	55.631		115706153	75.406	1.41487	48.8126		115699745	481.65	127.016	217.236
					115706228	11.4136	20.8849	4.70926							115701385	27.291	15.2474	63.2074		115706173	44.8073	6.88783	35.5096		115699750	11.8247	0.0403203	0.973728
					115706253	0.502288	1.54598	0.275989							115701405	0.118616	0.075441	13.1616		115706176	29.8093	7.77158	18.0916		115699756	9.35533	0.859451	2.20612
					115706260	0.367607	9.30638	2.68006							115701413	18.3017	16.6237	51.5354		115706205	26.0828	4.5052	15.8036		115699758	2.00369	0.001	0.161155
					115706266	38.4846	66.1776	15.8005							115701460	1.12321	2.20007	13.5586		115706203	17.3137	0.851626	8.32404		115699769	9.57471	3.44094	4.26335
					115706278	58.0681	177.272	34.7793							115701464	0.99923	1.31701	6.1519		115706212	8.89741	3.22557	10.0353		115699830	2.84169	0.119877	0.001
					115706284	32.6415	139.458	5.62065							115701470	6.99831	3.03629	8.62051		115706213	10.8302	2.46971	9.76566		115699876	6.82001	0.001	0.001
					115706291	38.4695	74.6084	9.44843							115701485	0.989238	4.04277	10.1124		115706215	9.04046	0.418883	4.71754		115699909	18.5318	0.414423	3.6112
					115706303	1353.22	3699.71	440.721							115701507	8.38383	2.73889	11.1462		115706232	9.4161	0.870329	10.6737		115699930	8.31979	0.107418	1.32167
					115706318	14.4262	100.363	15.1376							115701508	7.9962	1.18125	100.013		115706238	77.4867	5.61139	47.4492		115700007	7.12895	0.001	0.183771
					115706326	25.2271	129.53	16.9583							115701509	10.984	9.15319	29.8858		115706267	3.50173	0.538106	2.43793		115700070	10.8714	0.112627	1.18447
					115706369	14.425	32.6656	4.83395							115701523	0.604494	1.98944	8.06406		115706329	20.8355	0.042863	11.6514		115700243	5.4556	0.0623793	0.0832983
					115706408	24.3743	47.7253	10.9125							115701533	25.724	25.8407	73.7832		115706343	30.1018	6.24113	23.0228		115700274	4.7383	1.97583	0.167699
					115706424	58.2829	120.218	5.0795							115701544	4.74915	1.70188	6.25249		115706359	9.1694	1.87659	5.26647		115700282	112.295	0.001	0.460127
					115706434	80.4814	404.649	111.736							115701574	3.2672	2.39126	8.53693		115706379	13.5561	5.65962	12.3249		115700296	5.56064	3.01675	0.515923
					115706439	0.844687	4.14124	1.18538							115701580	13.0307	14.6027	30.5381		115706386	3.36361	1.09275	2.83135		115700302	17.7168	1.41889	1.49045
					115706440	3.37978	22.1609	3.43858							115701661	52.92	24.8341	88.8532		115706400	3.52033	0.001	2.02131		115700383	32.9374	2.68709	7.76705
					115706443	1.94648	5.05249	0.125786							115701871	1.39215	0.346764	2.33403		115706403	34.1646	6.63337	40.851		115700389	21.2506	4.38754	10.2043
					115706477	7.14449	16.2033	0.688739							115702021	10.0494	4.2455	13.9319		115706406	12.717	5.70659	13.8909		115700390	62.9953	4.52183	13.6668
					115706481	54.6017	135.977	39.851							115702049	2.46811	7.05078	19.9041		115706419	20.8196	6.82421	18.4081		115700449	18.1737	5.6313	8.51269
					115706496	0.620998	1.8051	0.620687							115702070	0.0983723	0.436484	1.62418		115706423	11.7047	4.81779	12.5333		115700465	13.4651	6.23867	1.65823
					115706497	0.525462	1.707	0.546987							115702189	16.1826	1.10201	30.8106		115706428	28.4222	11.2623	26.9682		115700488	41.4036	7.243	1.21054
					115706500	3.4355	8.10747	0.296597							115702313	5.31046	0.477241	10.6909		115706432	4.31219	0.111746	2.43382		115700496	31.8918	4.43346	11.9185
					115706508	559.484	1218.12	123.96							115702340	3.93502	4.74271	12.0194		115706451	1.10916	0.001	1.0562		115700499	48.1087	7.41905	4.64373
					115706543	1.91595	18.1142	0.264632							115702351	3.01872	0.460627	10.2516		115706457	7.25637	1.58386	4.08052		115700502	16.6172	6.31405	6.91756
					115706592	179.49	448.046	165.909							115702364	46.07	8.81348	145.174		115706474	5.59048	1.82893	5.98533		115700504	29.7632	7.42348	1.30036
					115706619	10.5696	16.6152	5.21865							115702373	3.97118	0.302048	5.39401		115706485	558.503	85.3216	262.207		115700508	3.79012	0.241334	0.383903
					115706627	14.556	37.2067	14.5018							115702379	0.701606	1.15445	23.5934		115706499	10.8559	2.51224	7.2022		115700519	24.0998	5.87252	1.66819
					115706638	6.77215	7.31095	3.14976							115702381	0.750867	0.032497	4.0087		115706517	10.5543	2.9787	6.08218		115700526	133.099	0.001	0.001
					115706642	29.4779	63.315	27.2373							115702393	0.442987	0.065715	1.12511		115706561	19.4194	7.96306	16.3235		115700529	38.6324	13.7422	10.2391
					115706645	30.7739	72.2242	29.2363							115702397	0.0313143	0.001	0.960684		115706586	3.65601	1.58482	3.69282		115700537	17.5396	4.72622	8.34848
					115706666	12.32	34.8638	5.49568							115702454	0.001	0.0868957	1.68432		115706598	6.73099	2.22991	6.0414		115700539	44.3733	1.07723	2.70018
					115706688	41.075	47.6408	6.50205							115702488	0.001	0.081243	1.16028		115706623	41.6166	2.81256	30.2365		115700540	23.9225	5.69679	4.35433
					115706689	17.6378	97.9094	15.6038							115702487	10.7266	10.1651	30.0121		115706632	19.1	4.44951	12.4882		115700551	18.008	7.4069	6.93464
					115706712	13.4144	63.7943	3.67251							115702519	2.55298	0.251406	3.70543		115706636	49.3324	20.3407	49.7037		115700571	0.827324	0.291111	0.017538
					115706721	1.07775	6.36689	0.737082							115702531	5.13811	2.04188	24.63		115706647	2.48858	0.826654	2.03523		115700572	126.153	31.4867	53.7532
					115706724	9.29136	70.0435	8.63763							115702552	0.572712	0.001	2.36746		115706682	3.90898	0.896521	2.43801		115700573	139.369	42.2489	60.6503
					115706754	99.0928	110.447	34.4674							115702579	2.01714	1.92795	6.52035		115706696	3.62593	0.001	1.84053		115700578	347.264	116.118	140.64
					115706892	47.1934	72.6117	8.08995							115702596	12.3968	30.8288	62.7022		115706734	28.1065	7.2762	15.8835		115700585	7.97213	0.211091	0.777703
					115706963	1.66807	28.2332	4.65375							115702599	18.0506	7.1953	28.6721		115706735	10.5073	2.9485	6.77066		115700592	5.18829	0.727341	0.912175
					115706976	10.542	53.2341	6.38732							115702659	13.6482	8.65852	50.295		115706743	11.0063	2.37194	7.40983		115700595	94.874	0.447358	1.01206
					115707030	7.39866	59.4098	4.11639							115702662	3.61191	6.34743	32.698		115706744	8.68723	1.59663	5.97676		115700606	60.2988	13.2132	25.1495
					115707033	11.3962	22.0342	0.366544							115702677	5.9802	0.475952	7.76205		115706746	9.05988	3.15808	8.97391		115700608	92.6709	37.8153	19.9037
					115707077	4.36165	24.421	2.04518							115702690	5.75139	0.277069	7.45628		115706767	9.06868	4.22548	9.18617		115700612	5.95061	2.82993	1.67623
					115707082	90.0095	742.748	90.972							115702705	2.12657	0.89921	8.48364		115706812	9.37174	3.37353	9.3275		115700613	3.23476	0.072576	0.31786
					115707114	17.5875	48.3716	21.7274							115702712	1.89163	0.903252	7.4088		115706839	11.6414	0.74675	6.3259		115700632	20.2773	1.35504	5.96306
					115707142	161.823	272.507	47.1021							115702722	14.3622	5.30791	27.6739		115706840	2.21446	0.706489	1.73218		115700636	222.599	62.8351	89.5396
					115707158	8.43962	34.6807	8.42478							115702724	5.40283	3.0157	15.4047		115706874	6.23935	1.67151	4.59316		115700655	24.4195	10.8278	5.71836
					115707166	0.001	1.36282	0.140917							115702725	8.27556	4.74343	25.2472		115706875	15.4158	2.86223	17.7921		115700658	20.873	3.26807	3.18441
					115707210	0.114224	9.89678	1.50244							115702728	8.36824	0.971269	12.5864		115706882	164.659	55.8103	120.875		115700676	5.4542	0.21344	0.0205773
					115707240	2.35301	5.08084	1.73504							115702747	6.1594	0.496373	9.12731		115706906	38.8469	7.41398	29.2048		115700680	3.59859	1.1379	1.77825
					115707252	38.1182	77.9821	34.907							115702750	0.406939	0.001	8.18014		115706911	27.5973	2.46579	20.2273		115700696	92.1778	0.0188203	0.001
					115707257	3.16261	62.3402	13.8149							115702773	1.45972	1.86795	5.42899		115706933	17.5418	2.60776	17.3617		115700704	12.2551	0.386523	0.659647
					115707278	27.5006	56.6565	11.1411							115702784	1.90745	0.268288	3.80991		115706943	128.086	38.9196	112.933		115700720	16.8242	0.504572	2.49104
					115707281	860.545	2201.29	201.543							115702787	7.31674	0.757802	10.1888		115707017	19.0075	5.77335	18.1774		115700724	14.669	0.349741	2.03512
					115707282	567.524	1137.67	100.442							115702799	2.16133	0.145591	4.48443		115707045	3.77028	0.223293	3.39902		115700727	4.16564	0.123347	0.658775
					115707286	59.4038	115.958	17.3706							115702806	0.997884	0.245734	2.6922		115707050	9.4295	2.5294	8.69673		115700730	35.6397	20.2342	1.59951
					115707288	15.9952	34.22	6.24673							115702836	41.2057	17.1986	67.6778		115707052	5.21124	1.7362	5.19728		115700736	17.5431	0.241115	0.380266
					115707294	17.7452	122.553	15.636							115702847	11.3836	2.46697	30.6852		115707061	3.46682	0.135864	1.8156		115700742	4.33737	1.08651	1.88283
					115707338	15.6206	40.4513	0.400393							115702848	9.36451	2.91561	28.4706		115707078	3.75145	0.97422	2.98936		115700713	5.99225	1.19981	1.0875
					115707365	0.670852	9.0813	0.0887347							115702851	3.84521	0.616178	9.11672		115707115	32.9037	6.9548	30.9517		115700746	115.76	46.9374	51.4821
					115707366	4.36258	9.5541	0.395026							115702858	30.1876	16.1881	104.062		115707119	1.38424	0.38535	1.52309		115700752	463.344	127.501	227.583
					115707367	0.241093	3.7822	0.068573							115702904	7.17633	7.48867	21.9189		115707121	20.0323	3.44199	19.5943		115700766	60.5346	16.1704	25.7394
					115707404	13.4485	29.3774	8.22586							115702910	48.7633	18.6908	60.404		115707161	3.7226	0.001	1.92781		115700782	58.7569	24.6372	26.4347
					115707411	19.5206	79.608	12.1387							115702916	33.7815	11.5702	69.6854		115707162	3.44089	0.459603	3.14753		115700791	1.33444	0.139493	0.0630423
					115707417	1.75833	3.97828	1.68462							115702940	1.22714	0.664734	3.84367		115707174	87.2867	2.34913	47.8879		115700792	1.96108	0.001	0.001
					115707434	0.483004	1.47059	0.116931							115702947	99.3758	28.1053	332.265		115707179	13.7692	2.69162	9.50095		115700796	5.05711	0.732945	0.977909
					115707439	0.112287	14.9105	1.1196							115702978	0.832547	0.146863	2.91628		115707205	11.8189	1.20411	10.7503		115700811	4.16432	1.71505	1.5074
					115707452	16.5111	48.5046	6.08966							115702980	0.041887	0.187926	0.750974		115707211	60.8792	21.4281	44.3471		115700813	32.1716	6.41707	10.4299
					115707473	1.20863	17.0474	5.64229							115702982	0.245907	0.221811	1.90719		115707220	12.5602	1.60767	13.374		115700826	45.8497	10.0029	13.1288
					115707498	7.8183	16.1057	0.845225							115702983	5.83623	9.37753	22.1211		115707248	3.22815	1.31151	2.77371		115700827	46.9863	0.033222	0.357411
					115707549	22.9304	235.257	15.7559							115702986	4.65332	0.934182	10.9217		115707262	5.65199	0.974828	2.67155		115700828	77.1412	0.269494	0.812027
					115707565	5.59971	15.1506	1.28865							115702995	0.454624	0.001	4.09677		115707271	20.7785	5.37466	14.9243		115700839	20.0335	9.80889	7.61895
					115707582	2.99121	52.214	6.96269							115703012	7.30689	0.905761	21.4973		115707328	41.704	12.0831	24.3743		115700841	17.2016	0.846655	1.13283
					115707598	98.1338	115.542	24.8727							115703014	22.7542	32.2346	69.8662		115707356	16.4617	7.4137	15.3034		115700851	7.36371	2.57378	1.45434
					115707603	367.147	701.25	47.7891							115703023	1.16651	4.89506	19.8596		115707397	63.1324	5.256	33.223		115700854	5.68156	0.001	0.001
					115707628	0.403919	1.8353	0.045989							115703031	1.62343	7.40252	29.4194		115707400	24.9657	5.74399	23.7756		115700857	6.18537	0.001	0.42756
					115707644	46.0015	118.902	14.0693							115703052	14.457	5.44161	18.552		115707423	29.7935	11.9762	24.6097		115700884	31.9904	5.86517	11.2936
					115707657	30.2367	67.851	8.51374							115703054	3.55947	3.70616	10.6388		115707428	16.1068	0.86454	14.0836		115700881	31.1178	0.198095	0.332547
					115707674	1.75316	6.22054	0.323979							115703073	18.09	4.83645	22.6487		115707432	6.80671	1.67253	4.76357		115700887	3.03083	0.726861	1.29101
					115707678	5.97599	27.1661	3.8223							115703099	29.9331	13.2299	111.162		115707447	36.1031	11.7072	38.4107		115700907	12.8325	0.001	0.001
					115707682	28.7456	165.351	19.1668							115703106	22.9364	11.2568	76.0493		115707484	8.01238	3.47479	7.29684		115700909	93.4463	31.8463	35.304
					115707689	21.323	70.2214	20.8136							115703127	5.67678	7.29575	19.7719		115707493	2.17308	0.919669	2.34199		115700917	177.467	0.001	0.0566753
					115707691	2.35391	7.77481	3.50915							115703138	3.88974	1.90295	5.70263		115707526	371.329	125.079	352.63		115700898	9.40798	1.35484	0.365733
					115707698	20.5677	100.168	10.5753							115703142	28.3652	11.9592	99.619		115707550	2.97312	1.28723	3.11833		115700925	157.341	50.8191	46.9194
					115707707	5.92093	13.4754	4.42451							115703143	4.4505	5.13136	14.4852		115707567	4.73949	1.51914	4.09425		115700935	1.00868	0.001	0.0234903
					115707718	2.33474	13.3083	0.560047							115703144	129.749	89.3726	315.696		115707593	14.7022	4.07699	8.99851		115700939	26.0811	10.1115	12.3257
					115707725	3.13413	15.7282	6.12402							115703172	2.46782	0.793016	4.27399		115707606	22.9468	7.36088	15.2671		115700940	9.20208	1.44526	1.54187
					115707728	23.5595	40.6262	7.51629							115703187	0.21985	0.001	1.29479		115707617	3.08454	0.776766	2.84029		115700941	4.6575	2.21261	1.59715
					115707738	150.611	308.033	44.2985							115703199	2.26186	0.132897	63.5118		115707618	8.97245	4.15818	9.57887		115700943	21.269	2.11784	6.17376
					115707740	20.3356	62.3396	21.7489							115703212	4.14518	1.88509	9.14641		115707679	18.9741	4.05835	18.6885		115700950	1.67589	0.426549	0.147157
					115707741	5.41598	186.087	12.5909							115703220	22.1879	6.29009	49.9457		115707696	6.17716	0.0167363	3.2474		115700956	2.49301	0.001	0.461052
					115707772	5.13761	26.0217	1.80418							115703243	6.92021	3.02887	11.5021		115707700	2.11629	0.6705	1.57224		115700966	6.51233	0.430225	0.0685363
					115707753	41.0153	84.1618	32.9256							115703284	1.98869	1.0706	26.5371		115707715	13.0122	2.54698	15.2479		115700968	15.508	0.049649	0.0115793
					115707802	6.38264	7.3807	2.08669							115703311	0.001	0.001	1.18296		115707733	62.0318	24.3706	54.4227		115700969	6.18627	0.001	0.0419407
					115707822	10.9822	24.0128	11.9785							115703544	7.39321	3.52607	11.9657		115707747	13.8847	4.86516	10.1684		115700978	36.762	12.7455	17.8439
					115707843	1020.13	2247.54	175.253							115703500	6.35389	1.6099	8.26146		115707762	25.5057	9.08119	26.6173		115700991	10.4918	4.47625	3.45898
					115707860	80.1061	89.9688	33.3778							115703559	0.459594	0.110612	25.466		115707787	20.5964	5.8625	16.7256		115701003	28.2001	11.2546	13.7713
					115707875	8.96104	36.6546	5.32522							115703588	1.02534	0.251477	1.5003		115707789	4.98146	1.47248	5.01097		115701016	24.8451	11.298	11.6576
					115707876	82.0456	167.392	50.8126							115703600	0.0323647	0.0435667	1.16341		115707804	14.9556	1.73553	14.9608		115701023	1.71691	0.001	0.0130503
					115707886	125.081	252.073	116.297							115703608	0.790647	0.351389	16.3364		115707807	11.5295	4.5753	10.6418		115701033	3.05764	1.56124	0.293346
					115707927	13.6803	65.1689	4.27768							115703614	11.0577	7.51539	66.3037		115707809	2.30428	0.407517	1.31452		115701047	15.0375	4.25659	6.03033
					115707938	6.92648	21.2462	3.4697							115703621	1.61242	0.0135337	5.31804		115707827	17.2583	0.844505	9.23752		115701069	8.11448	1.45731	0.299716
					115707942	7.31877	19.8896	6.52644							115703623	0.256278	4.39888	10.9965		115707832	2.30039	0.352192	1.09573		115701093	48.3091	16.0216	1.84359
					115707945	7.00487	20.9688	4.94643							115703762	2.67069	0.039941	4.40306		115707833	5.98838	2.74923	6.69627		115701122	13.4202	0.0573657	4.44887
					115707951	79.6563	338.975	79.678							115703797	1.11956	0.001	3.69997		115707847	25.9774	6.12628	14.8671		115701144	2.03007	0.227575	0.001
					115707975	7.47015	10.9425	1.575							115703825	0.764693	0.001	2.71799		115707872	2.6518	0.90893	2.79884		115701150	21.7588	3.77518	9.62959
					115707994	47.0313	76.0517	12.6691							115703829	9.93211	1.68125	39.4436		115707881	3.77597	0.887265	2.17737		115701151	28.3519	0.480972	1.46694
					115708024	4.96763	36.5354	10.8878							115703857	0.043609	0.001	0.964674		115707893	4.33445	0.001	2.01975		115701164	34.7123	0.312544	0.277972
					115708026	11.034	12.9498	0.503999							115703864	3.12576	3.94483	18.8426		115707907	3.96582	1.39012	3.28836		115701166	55.7991	3.41783	8.25796
					115708041	71.3409	147.273	40.0444							115703902	38.2283	51.514	169.054		115707925	8.64057	0.441419	3.69619		115701168	14.5028	6.63936	7.04408
					115708047	56.3046	199.012	27.8454							115703921	0.001	0.0444883	1.92667		115707933	66.9597	19.3173	44.0474		115701194	19.0813	4.39839	5.69567
					115708077	8.36779	10.5059	1.95754							115703936	0.43142	0.546734	1.39064		115707941	9.08	1.38527	5.47517		115701195	69.5507	0.001	0.14777
					115708099	8.82291	59.5054	12.1827							115703995	44.1136	33.3981	141.99		115707991	16.4046	2.89301	12.0007		115701200	126.984	3.20847	9.43224
					115708105	1063.05	8839.14	479.85							115704016	0.765549	0.001	2.01064		115707998	5.74381	1.26147	6.34156		115701201	6.65039	0.084343	0.28203
					115708126	9.10463	11.4644	1.06978							115704030	33.6443	23.4343	70.1636		115708028	16.3783	1.14996	11.514		115701203	18.5602	5.71605	0.148098
					115708157	4.79503	62.3843	3.7371							115704045	1.79875	1.81694	5.87308		115708061	47.1781	15.5644	37.015		115701222	2.1484	0.001	0.292669
					115708163	4.87933	19.9295	0.21473							115704049	3.43128	0.221299	33.9507		115708071	46.5251	13.2965	40.5908		115701221	34.5254	0.001	0.178957
					115708183	9.97816	29.9643	6.89746							115704050	0.380801	0.0877233	0.879726		115708084	11.8001	1.48843	10.8572		115701230	198.082	56.7657	96.3679
					115708199	6.50775	19.7878	4.54017							115704090	2.07868	2.64021	13.7806		115708087	12.3151	2.38774	9.39722		115701233	6.04675	0.491079	2.18853
					115708175	15.1676	33.8264	14.493							115704102	3.08184	1.11558	7.84955		115708095	52.7416	21.8208	53.9873		115701253	3.50718	0.001	0.001
					115708221	0.816202	3.88836	0.474896							115704150	1.41335	1.35018	3.15118		115708101	0.933146	0.224717	0.985823		115701266	4.89675	0.001	0.270459
					115708234	36.9983	120.962	29.6866							115704166	9.37778	2.09013	23.0081		115708113	12.7527	5.03443	11.8964		115701273	21.5325	2.33988	8.68522
					115708263	2.67198	16.5694	4.5361							115704192	5.89821	2.24304	18.6981		115708141	4.50051	0.85835	2.69402		115701287	4.37637	0.0567067	0.286644
					115708266	2.41925	10.0264	0.916165							115704199	2.23001	0.293009	4.3577		115708217	6.50053	0.661788	6.15911		115701299	10.7252	0.350254	1.07831
					115708267	11.4168	162.384	9.02412							115704205	5.31033	5.76709	34.3843		115708228	2.03452	0.331669	1.45167		115701321	14.5454	0.001	1.158
					115708274	16.2632	42.0188	10.8342							115704207	11.1517	5.73214	25.2941		115708229	3.46772	0.404524	2.04221		115701323	26.5222	1.17999	9.7431
					115708275	40.2412	229.917	29.61							115704295	38.5944	5.54247	74.5189		115708271	13.94	4.63836	9.54709		115701325	5.52779	2.61935	1.17028
					115708281	4.23209	20.1356	5.97653							115704329	5.76914	0.679499	15.9415		115708293	1.0869	0.169657	1.25344		115701328	9.46421	0.778014	2.87456
					115708295	0.836962	1.01078	0.167718							115704343	7.43544	1.86727	11.7978		115708296	4.52146	0.643683	3.64558		115701364	16.3577	1.38448	2.68894
					115708321	9.46126	29.1984	5.52221							115704384	21.7288	27.3218	97.173		115708312	119.233	3.65628	133.03		115701367	20.0998	5.51638	9.97911
					115708324	557.161	2341.93	310.782							115704419	0.0443193	0.0792277	2.10245		115708340	3.2174	1.36532	3.17079		115701371	3.51657	1.21548	1.61158
					115708326	5.70651	39.2272	6.79106							115704436	2.58893	4.26776	9.41721		115708654	11.2548	2.35169	7.20435		115701378	29.5461	0.563444	4.5259
					115708334	8.07451	36.0997	4.14207							115704439	0.001	0.117239	1.15654		115708658	13.8208	5.63397	14.2383		115701386	105.417	31.4896	30.9016
					115708335	17.6967	53.0916	24.8213							115704503	2.28906	0.354257	4.9699		115708660	45.0016	12.1303	24.9157		115701393	3.45777	0.001	0.4761
					115708342	2.90505	7.48347	1.9908							115704535	0.218411	0.0492337	1.54068		115708718	6.36638	1.92977	5.42698		115701397	351.057	1.56362	39.791
					115708655	1.86518	9.68683	0.966729							115704542	4.88365	2.0364	14.4767		115708724	1.47936	0.172107	1.65981		115701410	35.4222	2.04372	0.1453
					115708663	2.60491	8.08566	1.56272							115704555	9.10506	23.2731	64.3925		115708761	6.98696	2.46858	6.27921		115701418	104.989	2.12385	1.45303
					115708695	50.8492	156.201	23.8123							115704571	4.99353	4.20514	12.4592		115708803	9.37778	1.56233	5.08166		115701423	1.8651	0.001	0.0277317
					115708706	18.1655	27.16	7.976							115704601	0.197498	0.0410723	1.21653		115708810	9.26466	1.90746	4.78635		115701428	2.7643	0.153988	0.282626
					115708720	0.167014	1.89845	0.044401							115704610	0.152159	0.546406	1.71223		115708823	0.857163	0.063013	0.459933		115701432	5.30575	0.0356627	0.0580807
					115708726	13.9458	24.3234	2.8441							115704625	0.62948	0.287951	13.5999		115708872	5.18968	0.646908	5.89381		115701442	12.1203	0.555505	0.991317
					115708727	5.19361	6.5067	1.99666							115704641	0.771398	2.79584	5.26033		115708881	5.77705	1.59124	4.17295		115701448	7.60179	0.396991	0.867461
					115708738	12.9339	26.3143	5.21656							115704648	6.22707	2.18159	10.9358		115708888	49.1536	22.1628	52.3176		115701449	41.1393	4.05511	0.0856097
					115708741	5.16337	61.8074	6.07577							115704652	0.51414	0.0346093	111.189		115708919	524.901	123.716	318.287		115701467	507.583	66.7813	86.8939
					115708766	4.45439	15.7203	1.65897							115704666	2.40023	0.148626	4.64156		115708936	57.141	17.6151	47.742		115701469	256.121	12.7265	14.2252
					115708770	3.80988	9.75568	1.0105							115704682	1.2885	3.15298	5.60404		115708948	15.3211	0.001	11.514		115701471	7.14741	1.94964	2.71866
					115708790	1.08541	2.42791	0.780425							115704683	7.09621	10.4584	24.5352		115708999	6.31688	2.59653	5.59868		115701486	19.6478	4.21211	6.19159
					115708836	57.3057	298.061	43.0351							115704689	0.059091	0.001	1.16222		115709010	136.867	19.3305	91.7298		115701492	9.21506	0.024423	2.99665
					115708897	63.0145	172.25	22.0095							115704692	57.9152	18.2379	77.2834		115709056	0.80987	0.0733097	0.963951		115701496	61.5161	24.7539	29.6099
					115708909	89.0516	252.111	20.9866							115704712	7.60962	1.32058	18.3199		115709114	50.5988	3.78618	21.1637		115701493	10.8797	0.0207503	0.07975
					115708914	2.61244	27.3805	2.43962							115704713	1.86886	0.170071	6.92008		115709116	1.23734	0.0905473	0.892872		115701500	10.4187	0.001	0.0843617
					115708924	1.14508	2.4623	1.19561							115704723	0.005634	0.055811	0.957609		115709178	2.61831	0.612429	3.19728		115701501	1.63352	0.571355	0.620439
					115708949	2.83503	4.51124	0.0777483							115704733	12.786	19.8326	49.4916		115709179	4.29765	0.99892	4.57558		115701510	17.8047	3.15353	1.1871
					115708954	3.52361	7.80334	0.825533							115704748	0.116689	0.183756	0.928726		115709180	2.63534	0.47619	3.00731		115701513	10.6854	0.0280877	3.773
					115708987	0.574406	8.98788	0.243617							115704752	0.641824	0.001	2.02377		115709181	6.21108	1.57917	6.61137		115701517	6.30868	2.67337	2.12783
					115709008	3.39453	19.0219	2.68793							115704757	1.35504	0.237079	2.90912		115709225	51.1371	1.73751	25.5593		115701521	4.97174	1.08349	0.836004
					115709028	0.581409	0.975307	0.001							115704760	0.67534	0.0300667	0.938517		115709249	2.26469	0.648917	1.56244		115701529	14.3279	2.36729	4.10755
					115709041	0.738275	13.5094	0.302531							115704768	41.9732	15.2888	294.128		115709253	1.87217	0.336425	1.09372		115701530	7.35513	0.85436	2.94324
					115709045	241.433	411.793	34.8628							115704769	0.493854	0.117728	2.24656		115709262	30.9413	3.99182	14.563		115701537	1.53265	0.152949	0.321536
					115709101	3.71899	5.45891	0.897853							115704783	0.142174	0.611707	1.95338		115709279	269.852	119.111	251.805		115701538	2.38462	0.023072	0.640996
					115709185	5.70642	293.68	4.87281							115704794	607	350.143	1247.43		115709285	57.1025	21.466	54.4067		115701548	3.64514	0.126698	0.814714
					115709251	18.2126	507.709	67.0418							115704764	5.68122	0.364301	15.4783		115709286	11.6197	0.236063	11.7693		115701550	6.80709	0.238052	1.88555
					115709261	10.1091	12.3654	4.63468							115704798	3.05737	0.0289953	5.03376		115709294	7.41263	3.25075	7.61856		115701553	23.9211	0.001	0.243725
					115709267	204.537	661.16	45.2943							115704811	2.31819	0.518883	6.66455		115709305	16.5709	5.96346	14.7535		115701570	27.3715	5.52666	11.6259
					115709276	43.0135	108.923	20.5342							115704810	25.5231	30.7699	75.7338		115709325	10.1389	1.56663	5.8892		115701581	7.18734	1.79517	1.92405
					115709299	59.5425	283.962	65.1717							115704818	0.251237	0.001	2.34791		115709341	10.4542	2.00972	8.75801		115701582	6.41748	2.40216	0.398542
					115709358	52.8271	178.85	54.7499							115704826	0.218002	0.398378	2.65746		115709350	20.504	7.94893	16.9825		115701584	1.86535	0.16789	0.001
					115709361	788.912	2318	185.567							115704868	0.595738	0.0698983	1.31436		115709354	9.92129	0.512099	4.27604		115701761	8.36865	0.488643	2.64503
					115709363	18.8136	54.8851	12.4762							115704870	1.01946	0.001	2.17282		115709373	23.8846	10.047	25.3747		115701892	33.0743	4.64515	8.01292
					115709365	13.7448	21.299	4.5363							115704877	0.802517	0.001	1.16474		115709404	26.4493	1.54753	17.8693		115702002	28.916	1.74995	7.5661
					115709371	11.282	153.364	30.3828							115704884	1.8076	1.90671	4.12717		115709467	32.9504	8.85272	25.4382		115702010	129.166	13.1494	42.0521
					115709413	5.54806	15.3232	4.92386							115704905	0.0117527	0.001	2.95614		115709569	27.0279	8.4957	24.2562		115702031	4.11126	0.67939	0.728302
					115709427	5.32058	22.4024	3.88005							115704907	1.31538	0.001	1.82316		115709607	30.8656	6.77839	16.8751		115702037	100.917	24.253	29.2274
					115709455	0.723545	12.5514	2.7011							115704916	0.228881	0.001	4.56358		115709646	35.9433	5.89852	32.665		115702238	28.3478	11.6102	7.16752
					115709518	19.8634	60.1622	14.353							115704921	1.12939	0.001	3.99988		115709664	109.199	38.5258	80.9688		115702253	3.72296	0.784792	1.3996
					115709531	15.0559	35.6262	14.5122							115704943	0.511696	0.514476	1.13786		115709674	15.1478	5.82886	13.7744		115702309	457.425	1.13927	17.642
					115709544	2.59169	12.1475	2.68993							115704968	0.582337	0.444971	6.92763		115709690	0.912275	0.0753517	0.873357		115702315	18.3487	1.05185	0.407884
					115709567	17.4488	23.6913	0.327323							115704978	0.778244	1.12919	11.3988		115709694	4.28436	0.310067	1.81507		115702319	7.32209	3.52543	2.90857
					115709575	24.4983	116.141	13.5101							115704983	3.23667	2.86325	10.0989		115709696	9.36338	2.58345	8.26128		115702323	8.59246	1.95497	3.80002
					115709577	0.762026	8.59403	0.020419							115704999	0.001	0.32772	9.91465		115709697	31.3289	9.5931	19.4881		115702321	0.85816	0.0470813	0.0911703
					115709630	25.7391	136.465	20.7233							115705000	19.7018	33.5679	87.7961		115709721	7.20647	0.418263	5.43074		115702334	12.1001	3.06271	4.84091
					115709644	13.8715	51.0882	3.2691							115705003	0.439284	0.00953767	1.02902		115709745	13.7587	2.4476	8.82239		115702336	63.5331	2.63445	10.382
					115709683	8.14625	24.7045	6.89656							115705031	5.84387	0.336396	8.9445		115709781	69.052	28.7739	74.2299		115702367	130.22	0.206024	0.017869
					115709698	62.3789	172.846	15.7823							115705033	12.284	1.18128	21.5715		115709821	40.2912	9.67857	29.9451		115702385	335.684	56.3074	0.741881
					115709712	12.994	43.8282	6.80002							115705039	0.32656	0.001	1.53923		115709859	5.69566	0.470952	7.1776		115702390	1.61091	0.001	0.0151803
					115709756	15.0337	42.3945	7.16295							115705049	131.229	64.4713	280.747		115709870	14.6398	0.662212	5.94286		115702417	1.21478	0.0631583	0.0118763
					115709778	29.0038	109.986	45.2436							115705061	0.036944	0.0428087	1.35599		115709894	2.42077	0.745442	1.966		115702423	3.74835	0.001	0.001
					115709788	179.589	1162.25	105.168							115705071	0.0113593	0.098874	1.38821		115709905	4.60904	1.5448	5.1176		115702438	0.921432	0.001	0.001
					115709801	9.18836	45.56	9.64702							115705108	0.107685	0.235514	1.21681		115709928	32.845	6.28532	18.9015		115702434	3.08977	0.560267	0.667918
					115709808	7.19729	11.0708	2.89369							115705115	6.10681	5.71341	25.4593		115709940	50.9561	17.3607	40.8257		115702442	3.16987	0.001	0.001
					115709812	0.914434	2.86607	0.832007							115705133	4.01852	3.45173	8.5992		115709946	24.3545	7.39083	19.6593		115702452	3.2682	0.001	0.188887
					115709811	1.66966	14.5035	3.63373							115705143	0.108585	0.001	1.43203		115709952	13.1938	5.33262	11.8424		115702465	1.15238	0.001	0.00965333
					115709818	29.8498	167.608	11.6767							115705158	1.96509	0.935171	8.91225		115709995	59.0244	10.7494	42.7272		115702429	3.52358	0.0537107	0.31161
					115709846	3.64697	16.6981	2.24396							115705197	18.9777	39.4835	61.7913		115710009	4.47595	0.220181	2.40235		115702478	6.46192	0.001	0.0106447
					115709866	19.8172	78.224	4.99221							115705209	6.12184	2.76015	12.9203		115710087	6.3487	2.2499	6.73443		115702506	1.47482	0.001	0.001
					115709882	112.128	259.609	62.0877							115705212	2.57504	2.28229	8.24789		115710106	2.85306	0.001	1.53786		115702538	74.556	25.3101	29.9608
					115709910	195.747	560.68	74.0524							115705218	2.08289	0.001	3.68935		115710107	53.9681	19.7292	42.3483		115702591	1.19855	0.0746153	0.001
					115709943	27.2497	124.24	25.329							115705232	2.36445	0.507938	4.82887		115710120	7.9825	0.736563	9.40567		115702614	9.95927	4.01192	3.67544
					115709967	9.52001	20.1448	6.59631							115705234	18.8186	4.80352	36.516		115710131	35.1202	11.6363	26.7509		115702619	8.97588	0.0562173	0.764709
					115709971	77.5364	179.164	42.351							115705241	43.9996	27.6383	101.251		115710153	39.741	13.1849	34.7873		115702625	12.9253	2.59725	1.89312
					115710033	18.316	88.6504	13.1295							115705260	31.5414	18.1632	78.6985		115710159	2.4711	0.001	1.89385		115702633	1.8583	0.757969	0.616618
					115710240	33.5706	109.112	30.4448							115705267	3.63992	1.80202	16.6534		115710173	733.71	238.702	716.977		115702640	8.12552	0.093589	2.63619
					115710289	70.7895	158.176	27.9517							115705268	18.0695	5.07741	69.6568		115710199	1.44268	0.001	0.775687		115702641	6.01515	0.527111	1.96776
					115710290	0.63192	2.21967	0.30653							115705302	8.95772	4.12391	16.0728		115710202	9.05937	1.46825	10.5267		115702647	8.16602	0.001	0.592485
					115710301	35.9965	371.307	7.84515							115705304	0.425817	0.457058	2.31553		115710222	4.24628	2.03794	4.35898		115702656	16.7202	1.19469	1.76609
					115710316	2.04646	4.13813	1.65544							115705307	7.45893	3.70566	11.4301		115710256	12.6451	2.09909	6.03623		115702666	12.3136	0.001	0.413575
					115710285	13.655	28.2047	5.08087							115705312	11.4587	5.57459	71.6952		115710284	4.45372	1.14385	3.2201		115702670	5.2031	0.0149493	0.125248
					115710405	1.32086	5.00847	2.29204							115705364	3.57907	0.157404	12.732		115710306	11.8176	0.001	4.28361		115702726	13.5428	0.279984	1.80296
					115710389	22.5696	49.7397	17.4376							115705371	74.6778	25.1395	156.861		115710329	9.21361	1.54702	4.70086		115702733	11.0812	0.001	0.416593
					115710423	0.474153	1.7461	0.825558							115705373	0.201446	0.001	4.10276		115710355	13.7598	2.10095	16.5001		115702734	9.56044	0.001	0.293553
					115710629	7.59555	30.9729	11.2043							115705392	276.715	261.325	624.415		115710396	4.46429	0.695057	2.51208		115702709	1066.91	0.263915	4.83325
					115710643	2.66831	3.16554	0.798407							115705408	0.001	0.001	32.3866		115710492	11.8446	0.146381	8.01583		115702746	2.75723	0.745779	0.400475
					115710913	4.18222	9.70347	4.27916							115705423	0.889935	0.0918243	8.9025		115710531	1.2401	0.001	1.55765		115702758	18.5482	1.06762	0.184
					115710932	34.2289	79.9705	16.7414							115705429	8.62832	6.52206	33.6118		115710606	6.51329	2.09657	4.50983		115702761	41.2327	0.997873	0.511924
					115711136	4.64787	6.39823	1.75868							115705436	10.1757	10.4575	32.3959		115710609	108.814	31.8828	128.508		115702764	63.5149	3.96468	0.402301
					115711183	5.89668	65.7841	3.83681							115705448	6.14486	0.482099	13.6486		115710648	7.79147	2.14211	5.06014		115702765	18.0412	0.370204	0.362311
					115711241	12.8268	38.0783	14.321							115705484	0.99707	0.158507	7.36826		115710748	4.42222	0.533469	3.13329		115702768	184.326	1.96293	4.05018
					115711256	113.617	182.119	53.0238							115705498	2.53048	1.20426	4.2087		115710828	12.3151	3.33536	8.57105		115702769	108.47	1.44184	2.6373
					115711302	8.90498	171.785	7.19384							115705501	0.994671	0.140628	6.89043		115710978	4.17121	0.001	2.89505		115702775	26.2566	6.82873	11.9351
					115711322	15.6565	76.4776	8.76209							115705503	1.20422	0.463088	2.10336		115711100	1.46947	0.042098	0.891409		115702776	5.92253	0.0329523	0.909819
					115711340	11.7947	20.516	2.03644							115705522	9.81383	1.79471	21.364		115711142	5.78183	2.51593	5.05764		115702778	72.6824	0.95503	3.03037
					115711360	0.130245	1.59147	0.390245							115705530	24.2406	14.1629	94.3518		115711182	36.7742	6.42567	30.3337		115702783	11.2997	2.62914	1.84906
					115711366	42.3415	86.4845	43.0886							115705534	14.0099	15.5338	33.3292		115711187	36.6785	1.51384	18.4573		115702793	19.9327	5.89551	9.50726
					115711388	33.2203	202.101	28.0823							115705536	29.5002	59.7338	87.0275		115711204	19.2253	5.96943	15.4583		115702797	1.74735	0.0716527	0.0569197
					115711410	3.84793	19.1583	3.74544							115705567	0.0234107	0.0689247	1.01655		115711228	4.36314	0.898922	2.30443		115702801	5.56015	1.19217	0.775597
					115711414	2.40847	8.57412	2.92663							115705568	26.0555	14.3869	62.1347		115711255	25.187	4.19436	18.1729		115702825	16.4113	6.59609	3.49935
					115711438	19.151	43.4308	17.4081							115705571	10.9091	4.87049	19.1293		115711259	19.0718	6.13434	17.6363		115702831	13.8001	6.26163	2.70298
					115711459	20.8017	83.105	31.3749							115705595	40.59	15.9731	51.4633		115711311	4.71129	1.26242	2.98248		115702845	288.876	65.0704	84.0923
					115711480	25.7372	29.2005	5.74998							115705599	34.5752	13.2031	41.881		115711343	180.8	40.4058	169.398		115702866	88.3397	7.34267	22.3357
					115711484	11.4547	17.444	4.61906							115705610	4.26686	1.72028	11.8774		115711375	1.16536	0.072165	1.17414		115702878	5.95624	1.52831	2.12353
					115711506	10.3169	22.702	7.54688							115705620	2.7463	0.739585	9.24028		115711379	12.9909	0.42754	6.60193		115702891	6.32655	1.31657	2.21343
					115711518	9.78844	19.6243	5.79776							115705625	4.17497	9.15882	16.2378		115711391	5.46796	0.178622	2.58272		115702899	2.70385	1.32508	0.0175107
					115711558	8.21556	15.3562	1.51239							115705630	0.879006	2.87905	5.95849		115711398	11.9307	4.7328	10.4286		115702915	8.58882	0.184879	0.958624
					115711560	8.21166	9.40277	3.18643							115705643	7.32508	4.72813	22.0762		115711397	30.9222	9.25971	24.114		115702938	23.1048	2.80565	7.9762
					115711565	7.35583	11.3202	2.45832							115705647	0.805669	0.138529	11.9182		115711411	100.161	35.6813	75.9585		115702948	634.015	183.493	262.157
					115711594	2.42721	11.2868	0.355638							115705664	6.18741	0.227751	13.0451		115711418	94.8712	26.0303	65.559		115702964	37.1851	0.0890387	1.91835
					115711601	39.7449	102.787	3.97924							115705685	1.30956	0.315248	2.45772		115711437	3.59936	1.58016	3.26912		115702967	47.5534	8.17268	18.7955
					115711609	13.2081	72.9946	15.7212							115705702	8.42459	2.93982	11.6658		115711476	3.63545	0.0388857	1.51916		115702974	7.86729	2.46579	2.16545
					115711613	6.68293	14.2344	2.94596							115705716	17.4621	22.0104	48.9875		115711495	2.49555	0.720895	2.15867		115702990	3.26801	0.001	0.700054
					115711631	2.48652	5.72569	1.1292							115705728	1.15882	0.869116	5.506		115711530	9.04502	0.819503	5.87101		115702994	2.78393	0.833012	0.702879
					115711648	5.68651	63.3717	3.71576							115705740	21.6882	24.4109	65.093		115711531	1.72782	0.802359	1.6985		115703018	4.76847	1.22129	1.28668
					115711657	0.319876	4.87204	0.478331							115705753	20.6712	4.20847	30.1997		115711635	5.12643	0.651956	4.7375		115703025	78.9871	0.001	1.14352
					115711764	21.1176	23.7353	3.74882							115705755	23.2109	1.78441	55.9441		115711655	5.02387	0.879656	3.6447		115703027	5.5933	1.37216	1.47791
					115711954	18.7585	62.3752	14.408							115705770	16.6294	0.577427	30.1489		115711668	50.9673	12.1353	28.913		115703034	61.879	1.62867	0.4188
					115711956	8.96227	36.0097	9.3794							115705787	2.6417	4.02175	12.3166		115711674	1.42633	0.238496	1.53638		115703039	4.26562	0.583383	1.58428
					115711967	51.4981	72.5426	13.6351							115705817	12.3084	1.78333	19.7181		115711678	26.9344	10.9333	30.6751		115703050	104.096	35.7763	33.7037
					115711988	1.41422	3.23375	0.586627							115705819	0.430207	0.535139	1.76314		115711681	11.1729	4.31248	11.9432		115703053	4.73179	0.001	0.304714
					115712001	12.1542	23.0576	2.76048							115705822	38.3956	30.9299	79.8771		115711693	59.0182	14.0974	32.3218		115703076	3.32924	0.279205	1.16956
					115712007	19.5735	41.731	6.566							115705831	9.6884	3.6166	14.1925		115711696	23.9581	0.613217	12.0052		115703090	1.36379	0.171607	0.521381
					115712031	12.7084	64.0043	5.37725							115705835	2.52073	1.83525	7.10829		115711703	2.47082	0.848622	2.22817		115703115	12.0971	1.38582	0.133603
					115712060	27.648	83.7631	16.5028							115705838	12.354	22.8352	60.9869		115711709	2.2338	0.074733	2.0604		115703128	13.7584	1.6382	1.00661
					115712061	62.3583	80.8256	10.6853							115705847	30.8932	29.0599	65.7795		115711780	76.135	27.5423	57.8601		115703130	10.6288	0.171244	0.09604
					115712067	1.12091	2.1712	0.461135							115705855	30.0132	13.1036	62.3456		115711921	1.53604	0.617695	1.77678		115703137	1.94569	0.268365	0.614221
					115712086	28.3778	160.573	22.2904							115705860	1.05559	0.721441	18.9401		115711924	10.9414	3.77095	11.0048		115703148	15.2566	0.452073	3.59704
					115712095	1.18789	3.46354	0.044628							115705859	1.21377	0.39837	12.0699		115711934	18.0546	7.84004	15.9279		115703155	3.24278	0.001	0.354188
					115712101	1.82671	4.04533	1.62071							115705864	16.4892	15.8804	69.7683		115711945	2.30228	0.175162	1.07778		115703164	13.9823	6.55682	4.72312
					115712109	2.65912	7.4403	0.744972							115705873	6.8734	3.30569	8.07051		115711951	7.8003	0.459435	3.6591		115703170	17.8256	0.001	0.001
					115712119	35.1303	110.679	24.8503							115705875	4.55361	4.15361	42.3053		115711982	2.89146	0.122476	1.75504		115703176	3.41834	0.001	1.15584
					115712125	7.92771	20.6668	8.30262							115705879	9.23115	8.52031	24.3527		115712000	5.37666	1.98305	4.71463		115703179	78.1923	1.49351	0.789393
					115712139	11.3824	27.2702	9.91524							115705890	0.592999	0.001	12.8626		115712036	6.04208	1.95947	4.9141		115703181	268.429	38.9878	57.8431
					115712179	50.3939	201.435	46.1329							115705891	0.323576	0.001	5.61848		115712049	13.2562	3.76258	9.81107		115703182	96.6877	0.0709747	0.066663
					115712235	3.60598	13.4898	6.19329							115705892	0.626472	0.001	90.0185		115712050	2.48367	0.001	1.79365		115703183	10.102	1.70199	3.58035
					115712241	3.38648	7.13667	3.46857							115705894	44.8143	42.6897	151.468		115712063	2.92353	0.001	1.91959		115703186	30.4925	0.0602393	0.885523
					115712250	1116.83	2932.78	219.593							115705895	1.11229	0.462178	4.70763		115712094	2.15453	0.001	1.28196		115703191	3.98161	1.62522	0.965848
					115712254	0.415515	1.37373	0.133232							115705896	0.282311	1.30907	3.79212		115712106	7.00396	0.001	7.03463		115703201	4.69519	0.001	0.001
					115712251	1.48029	1.67272	0.502539							115705900	10.2398	9.40737	21.8224		115712112	25.1708	6.0636	18.5416		115703208	1.70149	0.001	0.025697
					115712262	8.12744	115.274	4.70224							115705905	9.99482	3.15622	18.7106		115712132	1.25099	0.001	1.52326		115703222	5.41648	0.652573	1.01721
					115712273	4.54329	10.8516	1.79733							115705912	9.37292	18.7499	28.7195		115712135	278.161	54.6336	164.675		115703246	23.2116	2.57526	0.024672
					115712299	2.23662	8.17962	2.79286							115705916	0.96442	0.443069	4.99501		115712146	1.71085	0.001	1.05491		115703436	9.29471	0.284315	2.35299
					115712372	2.85267	3.87304	0.155228							115705921	3.36626	0.543067	10.3601		115712199	8.05398	1.69573	4.10757		115703570	8.54775	2.33417	3.62511
					115712401	9.50139	51.1355	2.42829							115705923	3.77912	0.560001	4.83744		115712266	0.690325	0.001	0.858721		115703584	26.7626	0.24043	1.15752
					115712469	28.9767	195.834	28.6865							115705925	8.84732	2.05749	16.4192		115712296	3.39998	0.240239	3.33906		115703590	11.7156	0.312806	0.649777
					115712470	8.11139	23.6042	3.32806							115705928	10.8877	10.656	22.9021		115712304	1.19463	0.001	0.698557		115703615	14.788	1.48411	0.8312
					115712478	27.215	76.5794	27.7521							115705936	7.07741	2.65605	9.22749		115712315	1.32882	0.120526	0.669241		115703617	3.17542	1.45759	1.554
					115712490	0.731272	1.80007	0.201919							115705942	10.2951	7.92287	21.5284		115712330	8.73955	2.08241	5.70278		115703618	49.539	0.001	0.696362
					115712493	6.75344	41.0813	0.748553							115705984	1.12943	0.412053	4.45982		115712337	9.38072	0.850103	5.06298		115703628	10.9926	3.1488	0.99356
					115712506	54.176	130.534	29.6347							115705992	6.5359	7.16053	20.6075		115712334	253.831	95.3419	240.024		115703616	4.68794	1.2804	2.30803
					115712545	0.985776	5.75986	1.60705							115706012	11.2492	13.4861	34.3421		115712342	7.24931	0.510206	3.96871		115703651	6.09797	0.0294913	0.923062
					115712564	1.75215	9.75171	1.1995							115706035	0.94071	0.121435	3.12422		115712350	1.73833	0.133633	1.02812		115703666	8.75432	0.373508	1.38157
					115712566	389.42	1333.14	96.8348							115706039	3.13113	1.51058	5.52267		115712375	17.7087	8.39716	18.4545		115703665	2.48807	0.0387033	0.001
					115712594	9.0044	34.3299	7.89314							115706041	6.96479	3.4386	11.7686		115712387	141.536	39.5331	88.326		115703671	40.436	11.3144	15.9107
					115712642	40.6619	210.471	19.6976							115706045	1.6346	1.49562	9.28191		115712405	79.7784	23.7842	75.4665		115703682	9.73459	0.846241	1.09312
					115712676	5078.52	10214.7	793.01							115706044	18.6822	7.66509	76.6501		115712411	63.7384	20.8997	46.9235		115703704	23.5401	0.0502597	6.95401
					115712677	66.9741	110.024	32.9577							115706056	21.531	20.9666	47.9393		115712444	2.76407	0.437804	3.10735		115703710	1.43746	0.414399	0.418816
					115712709	3.56598	7.43533	1.10853							115706061	8.37837	5.06874	23.4554		115712482	14.211	1.40602	7.42036		115703720	2.79863	1.07122	0.798639
					115712710	9.11588	21.4741	10.5446							115706064	9.23827	6.2903	20.8297		115712489	37.4945	0.230942	28.1282		115703721	10.7288	1.03664	1.97782
					115712719	12.3932	65.3274	7.3234							115706090	3.68436	5.10854	25.6167		115712502	121.94	5.90494	118.724		115703726	3.86479	0.001	1.15978
					115712725	2.78283	10.6449	2.62651							115706108	29.8882	20.4619	96.1006		115712503	54.3909	11.5954	66.0862		115703732	3.24272	0.534757	1.28334
					115712729	25.7568	217.184	6.74513							115706110	2.8568	2.16694	14.3607		115712510	16.7616	3.82046	11.0519		115703740	16.981	0.0691033	0.111881
					115712741	11.735	57.4491	7.22224							115706113	5.42702	5.58556	18.9006		115712516	0.912579	0.001	0.541656		115703748	23.5364	3.30916	4.94151
					115712755	37.706	300.909	48.3808							115706121	11.8051	5.5276	16.1251		115712540	220.688	0.724622	152.632		115703790	4.97246	3.02383	0.181639
					115712789	4.07158	4.99724	1.3541							115706122	1.76873	0.001	8.38949		115712548	34.5902	12.0383	27.8373		115703792	258.799	0.001	2.89411
					115712801	158.472	762.892	92.9349							115706123	9.8745	15.7758	39.3771		115712555	32.7959	12.2082	28.6394		115703819	12.8227	2.82186	2.00363
					115712843	75.3012	285.051	96.5318							115706124	1.85943	1.98789	4.1455		115712573	16.7235	5.09113	11.681		115703845	65.7042	22.8189	31.2732
					115712845	1013.83	2869.88	250.586							115706139	3.95718	3.44002	9.16364		115712615	56.7992	8.54654	29.6584		115703859	18.8607	5.89992	8.16124
					115712853	4.40649	14.6783	5.94643							115706159	57.9554	81.9975	1014.16		115712638	39.2751	12.108	28.2818		115703885	361.823	96.7196	156.228
					115712868	16.6846	34.134	15.7693							115706166	18.0318	20.8649	46.5418		115712660	23.1649	8.45953	21.6914		115703914	15.8968	2.99026	0.892441
					115712925	51.6505	152.847	16.8076							115706168	3.91126	4.14288	38.6507		115712662	9.06053	3.14105	9.38921		115703953	3.46692	0.321878	0.936283
					115712965	2.14257	19.7884	0.417062							115706177	13.5236	8.14403	155.084		115712673	6.02183	1.26919	5.04418		115703964	1.21329	0.001	0.094699
					115712982	24.0041	49.7794	11.4276							115706211	1.14497	0.66788	5.95538		115712714	34.1032	12.3669	26.599		115703972	1.84353	0.304146	0.307414
					115713035	12.2093	61.7876	5.77058							115706216	6.39631	0.001	15.2102		115712744	86.044	40.1131	95.1072		115704018	7.00367	2.43507	3.24574
					115713039	18.954	38.6995	5.96936							115706224	8.40534	6.65091	18.1417		115712747	145.779	26.8903	72.176		115704023	3.11546	0.191967	0.208018
					115713070	18.3326	61.7965	26.5398							115706226	1.52975	0.789882	4.54404		115712754	10.7419	5.21056	12.081		115704034	4.22102	0.099798	0.287229
					115713072	31.4619	100.931	22.1704							115706235	0.327431	0.001	1.64781		115712766	241.79	62.3987	193.216		115704043	15.249	0.0498037	1.32284
					115713078	1.83997	12.5636	3.92535							115706240	2.26837	0.578785	10.0585		115712771	50.6486	3.99999	43.7655		115704082	9.66323	0.198413	2.22307
					115713105	0.336898	6.10787	1.22373							115706241	15.124	14.0872	35.905		115712778	9.83035	2.83768	7.61848		115704097	13.9551	0.731219	2.18922
					115713111	11.0418	191.364	49.7555							115706247	1.3013	1.80875	5.98907		115712796	15.3499	5.63242	13.1608		115704143	32.2675	0.165133	0.0927613
					115713184	27.422	42.4747	3.54296							115706255	70.1227	29.117	100.588		115712812	7.19163	0.206688	3.00683		115704175	5.08452	0.001	0.318161
					115713227	1.18799	11.2981	0.992665							115706257	10.7084	4.85445	30.5992		115712819	81.0605	37.6547	76.6366		115704163	8.85011	0.001	0.495992
					115713266	15.8596	74.3364	15.8688							115706280	3.98515	3.2871	11.4931		115712833	9.20829	0.699568	4.28454		115704213	1.74677	0.001	0.12393
					115713329	6.78379	14.3352	2.64332							115706331	20.0038	4.60748	51.4397		115712838	18.5163	8.1604	19.8718		115704269	8.59522	2.41612	3.82115
					115713724	65.1766	135.373	43.28							115706346	7.13969	3.50254	10.9217		115712847	67.8657	10.5097	34.3155		115704267	27.1197	1.45632	0.102307
					115713739	25.1687	88.4468	22.2244							115706356	10.1983	2.32711	18.2215		115712869	105.774	29.1377	69.3488		115704285	1.58376	0.231061	0.442457
					115713781	2.14935	6.03073	1.8741							115706361	10.0277	2.64641	22.9728		115712878	37.2712	18.3992	38.141		115704291	3.33106	0.221085	0.78296
					115713788	159.176	1058.13	59.1073							115706377	44.1067	55.641	117.331		115712883	3.09765	0.001	2.75517		115704294	47.8938	0.152661	0.0300603
					115713817	15.1172	100.035	26.6548							115706382	5.61572	2.16194	9.69291		115712884	32.0022	15.4766	32.6459		115704317	1.43001	0.001	0.199428
					115713839	2.0497	6.13101	2.5565							115706385	0.001	0.103377	2.67597		115712912	18.7505	7.317	16.9415		115704341	3.26478	0.001	0.001
					115713858	8.02582	9.93437	3.24652							115706387	1.16376	0.803159	3.74758		115712937	6.01001	0.815103	6.472		115704349	18.5382	2.88452	6.01396
					115713865	28.0702	131.239	14.7409							115706390	8.05015	2.43634	17.6651		115712942	9.23323	4.24065	9.70125		115704365	2.78043	0.220097	0.700412
					115713874	0.143777	7.52746	0.223276							115706409	1.00567	0.240071	2.67145		115712975	23.8856	5.85752	15.8222		115704407	8.44759	0.001	0.001
					115713922	10.8354	39.6304	12.2626							115706430	16.9794	12.9547	35.607		115712976	24.3035	10.3718	25.379		115704428	2.55841	0.001	0.001
					115713909	40.4819	102.859	39.7924							115706436	1.81911	1.51375	3.95121		115712984	77.075	11.3461	58.37		115704432	2.16363	0.001	0.132224
					115713941	45.2283	428.953	50.0351							115706437	2.44831	1.78998	7.39113		115712992	20.2486	5.52484	15.6669		115704435	11.2079	1.60442	3.78168
					115713952	12.1156	66.2643	4.0882							115706441	0.935696	4.157	11.0767		115712998	33.7748	8.24246	25.8936		115704456	14.9887	0.08217	0.0711643
					115713964	73.6978	249.164	41.7737							115706473	21.4623	8.38595	58.7459		115713037	8.10664	1.14745	4.57041		115704480	6.04064	0.111857	0.367616
					115713990	7.59478	24.5248	9.10907							115706487	22.5765	7.81594	33.5352		115713060	3.23997	0.632219	2.22551		115704484	2.46906	0.001	0.182993
					115714006	6.25673	7.27635	0.286899							115706501	18.9679	2.28247	588.435		115713305	5.31711	1.89874	4.40509		115704500	122.362	3.27512	0.178266
					115714010	59.8074	543.169	166.255							115706505	22.8834	3.67849	39.5825		115713417	5.324	0.850566	4.93861		115704498	4.95773	1.73625	1.79234
					115714034	32.366	79.7396	6.73669							115706515	0.243271	0.090651	24.8754		115713556	6.36005	1.49876	5.06705		115704523	371.645	234.475	40.5693
					115714057	23.0084	25.1494	9.50734							115706536	11.5177	3.37256	15.6962		115713617	2.53182	0.433533	2.30798		115704534	4.38316	0.0302393	0.0253143
					115714101	8.15441	17.5615	4.70162							115706564	2.02825	1.69734	37.0035		115713634	0.943346	0.239458	1.0751		115704553	2.57858	1.29101	0.25227
					115714122	65.539	205.497	19.7313							115706578	8.44466	3.1275	25.9058		115713830	0.735226	0.041098	0.769539		115704533	3.38018	0.645761	0.516965
					115714134	42.6859	1673.37	193.67							115706579	4.21106	1.13447	11.9262		115713842	10.8546	2.76108	11.7959		115704567	17.9826	0.001	0.524627
					115714153	22.1572	36.6927	6.12377							115706590	15.2712	3.44315	21.0821		115713878	21.5293	9.67782	23.4849		115704569	3.03981	0.179411	0.0882097
					115714156	59.7848	223.866	100.745							115706587	0.994584	0.424907	4.46799		115713956	6.23587	1.8996	6.14587		115704572	3.07654	0.001	0.730115
					115714167	0.828284	3.61789	0.250814							115706668	53.324	8.08647	166.011		115713968	9.97547	3.25736	11.1256		115704583	9.28111	0.0434837	2.70219
					115714180	2.04899	21.7979	0.331327							115706670	12.0286	0.801374	35.78		115713991	9.96391	2.05595	6.958		115704594	4.24996	1.13701	0.440715
					115714181	10.2663	24.607	7.51026							115706677	11.1465	4.99331	31.2772		115714009	1.68758	0.0411713	1.9581		115704624	25.8375	3.03084	4.31678
					115714183	4.36394	200.299	12.3291							115706685	2.80619	4.23137	8.69648		115714002	10.9376	1.88545	6.29515		115704637	5.16331	2.51438	1.37603
					115714187	7.74921	20.4959	6.21296							115706765	344.188	370.576	890.227		115714045	0.989326	0.001	0.618641		115704640	9.1241	0.651682	0.036731
					115714189	38.7869	88.2333	17.698							115706776	4.56106	3.03367	23.3048		115714069	14.7444	3.6852	7.73497		115704638	62.7651	16.0961	25.3858
					115714200	10.4895	49.314	7.74686							115706792	0.731607	0.0881817	15.2468		115714070	33.6103	7.89594	20.6416		115704664	7.56626	0.542961	1.95941
					115714229	36.1218	79.59	7.71512							115706796	6.44961	5.69691	14.5465		115714105	8.59224	3.17047	8.30542		115704667	213.193	0.001	2.16443
					115714260	7.96046	25.1669	4.10483							115706799	0.57569	0.144611	1.39632		115714116	8.48776	1.25104	10.188		115704674	2.58985	0.763325	0.963654
					115714272	49.9812	143.259	43.4982							115706817	27.3899	14.3827	82.3989		115714118	28.3539	0.001	24.5184		115704690	28.9893	0.001	0.0418943
					115714280	5.61365	10.9652	0.856919							115706821	11.709	2.35286	18.4584		115714117	11.3711	2.31388	9.76838		115704669	17.6091	8.11726	7.36464
					115714304	8.43504	36.8152	3.45228							115706822	1.28301	0.733373	7.74818		115714123	8.71728	1.42258	7.27728		115704719	76.7154	35.5254	37.8362
					115714351	11.7888	16.4157	0.738871							115706831	3.34381	6.70722	14.8234		115714135	334.688	80.3837	226.208		115704720	2.55107	0.0378537	0.305352
					115714385	98.2672	777.896	42.1396							115706844	3.8126	0.749493	4.88412		115714148	159.798	63.1802	129.032		115704735	2.40676	0.0847073	0.407184
					115714407	2.3796	8.3401	0.476786							115706853	6.2196	4.84709	15.1197		115714149	21.0845	4.02601	15.7786		115704737	14.4807	3.40178	6.62829
					115714426	3.1517	24.2874	0.604217							115706855	25.4094	24.8254	58.1307		115714162	12.8862	2.8319	14.6349		115704739	3.32424	0.611107	0.807921
					115714433	8.40267	38.9544	2.11843							115706862	25.0765	35.2434	251.112		115714163	24.9123	7.28517	20.315		115704743	2.73413	0.001	0.001
					115714495	3.38318	8.50215	2.35578							115706883	17.4628	13.1716	67.6667		115714164	21.712	6.5216	15.265		115704745	4.10599	0.001	0.001
					115714497	47.0794	98.7366	41.0781							115706893	8.909	8.19217	18.9754		115714192	34.442	10.7206	33.5967		115704754	1.52844	0.0519413	0.544444
					115714511	4.11511	11.4246	4.59645							115706916	22.8595	5.96454	30.4686		115714211	8.99733	0.381419	7.32773		115704761	9.54598	0.199485	0.855371
					115714523	20.6473	72.0393	14.1786							115706938	2.61346	0.612702	5.9546		115714214	11.4068	4.2292	12.8194		115704774	3.68553	1.06762	1.13313
					115714527	5185.9	11838.3	483.639							115706947	57.3815	18.9114	90.7637		115714219	18.6598	7.44346	19.9377		115704778	4.07939	0.001	0.001
					115714535	0.137593	1.98885	0.19604							115706951	0.090801	0.001	2.65718		115714223	5.54548	2.04847	5.37589		115704793	4.91425	0.297287	1.14531
					115714544	6.67385	11.2116	0.856812							115706952	9.77375	1.12597	12.7765		115714227	2.28081	0.310559	1.02649		115704790	1.81496	0.001	0.240929
					115714550	5.10509	7.83505	1.33612							115706955	10.376	7.30606	22.248		115714238	10.4604	0.678167	6.50697		115704805	4.22356	0.001	0.079572
					115714578	40.5557	146.618	24.0681							115706953	0.37183	0.637976	7.93501		115714241	11.9027	2.33468	6.43786		115704807	2.8747	0.171591	0.15317
					115714600	37.7947	119.468	42.745							115706966	3.6057	4.35831	9.67838		115714246	27.2345	9.79429	21.7693		115704819	2.37196	0.001	0.136688
					115714581	0.970369	47.6866	12.1932							115706969	0.203584	0.072943	20.512		115714256	45.1455	7.07811	26.4992		115704560	8.69652	2.33463	3.10162
					115714622	11.2643	16.7143	1.41237							115706997	0.0340003	0.001	2.14452		115714268	6.04274	1.03454	3.45868		115704832	0.853613	0.0689143	0.0621973
					115714644	5.60063	18.5675	7.98909							115707009	11.6482	4.30442	20.3829		115714274	30.0742	5.84291	31.1006		115704833	3.13316	0.001	0.074046
					115714646	17.1382	34.9459	9.10397							115707013	0.001	0.001	1.85564		115714311	2.03961	0.001	1.84461		115704837	3.56655	0.001	0.079735
					115714669	429.345	1043.93	91.2854							115707034	8.68753	11.474	108.154		115714316	47.9772	15.5161	41.3805		115704848	1.14723	0.0715707	0.0190463
					115714684	21.2599	55.6291	16.9604							115707037	20.3147	17.1508	45.0111		115714369	4.67115	0.199746	2.33068		115704851	8.23174	0.106093	0.892984
					115714688	5.3676	16.6342	8.29181							115707044	3.395	1.64852	7.16286		115714382	22.4773	6.18555	13.3717		115704855	24.9439	3.84052	9.77306
					115714839	32.2584	67.0388	3.02402							115707051	5.49699	4.25603	13.0853		115714386	5.34518	0.001	3.72761		115704864	3.98248	0.001	1.39376
					115714852	3.33868	29.0074	8.14893							115707048	10.6623	15.2267	46.6356		115714393	6.97182	0.826776	3.50647		115704871	1.54945	0.102693	0.427436
					115714873	14.121	31.7922	9.92228							115707066	0.001	0.001	4.41085		115714409	6.66056	0.761484	7.58711		115704873	4.99364	0.90589	0.288881
					115714880	0.176847	3.80641	0.001							115707072	1.63579	1.0485	4.02596		115714410	32.2188	12.7001	29.3481		115704874	15.4364	1.19286	2.44181
					115714908	12.5651	16.0477	6.1157							115707073	3.02513	2.5719	6.13371		115714421	46.8421	12.0971	35.6634		115704879	7.65228	0.001	0.001
					115714924	2.25103	12.5271	2.52865							115707081	3.33533	0.798402	13.8294		115714425	10.5866	3.34095	7.25298		115704880	60.7459	32.1388	3.23315
					115714934	21.2356	92.7719	10.5111							115707090	1.04264	0.171941	1.73545		115714461	14.9646	7.28285	16.0367		115704883	2.28038	0.139353	0.001
					115714950	0.0514013	2.11214	0.001							115707097	17.3728	6.45192	67.322		115714464	23.3225	2.19361	14.8115		115704886	2.0501	0.001	0.161602
					115714990	22.1154	24.485	8.99462							115707098	1.18545	0.194807	5.01115		115714474	35.8725	6.77214	26.6982		115704892	4.02493	0.652585	1.28501
					115715011	2.65122	10.2844	3.06027							115707100	3.4633	0.617716	5.34591		115714501	11.3863	4.97938	11.5785		115704898	116.779	40.7826	57.9351
					115715052	0.7473	24.9183	2.82134							115707123	30.709	12.8004	37.2006		115714517	4.82905	1.44143	3.75696		115704901	7.98625	1.80229	0.574438
					115715127	20.6349	31.8106	1.85002							115707132	6.9741	5.33342	43.1378		115714526	55.3275	9.96557	27.861		115704912	3.94089	0.110118	0.27749
					115715128	0.001	6.35323	0.73204							115707133	0.051372	0.467732	22.6368		115714557	38.492	10.08	31.5813		115704913	1.07447	0.0800833	0.0135663
					115715161	1.10422	4.44564	0.378796							115707139	15.5082	5.37816	31.7725		115714558	1.07345	0.115108	0.747341		115704922	2.50414	0.81664	0.983186
					115715194	66.1624	156.44	55.7756							115707149	5.0385	7.57876	17.716		115714559	14.117	2.26026	10.6929		115704933	7.04901	0.0464163	0.872975
					115715199	4.40498	14.4022	1.1992							115707147	21.4746	10.2325	29.6858		115714569	8.01383	0.986152	3.91421		115704942	11.744	5.66758	0.0259613
					115715246	23.94	77.7039	18.8802							115707153	0.278819	1.51361	3.58703		115714571	74.1037	31.1416	72.8783		115704946	24.82	0.001	0.001
					115715257	0.452741	4.87954	1.08445							115707154	0.0295297	1.32031	2.6437		115714628	16.8971	8.31747	18.7387		115704959	2.37255	0.15137	0.0679917
					115715258	16.6138	28.9752	7.59119							115707156	9.94323	16.1328	51.7017		115714638	11.354	3.05948	11.4432		115704972	303.422	85.6642	113.532
					115715270	10.0827	24.241	7.3264							115707160	9.31794	0.97927	21.5831		115714659	237.792	74.3717	244.735		115704977	4.04159	0.858556	0.001
					115715294	33.4422	100.293	18.0296							115707171	247.783	97.5655	345.76		115714667	13.4613	6.48606	14.0058		115704995	12.1917	5.89395	0.0585567
					115715296	13.4108	28.4048	13.8304							115707181	14.8388	3.37402	99.9109		115714722	5.18629	0.529035	4.54154		115704998	17.321	0.001	0.0835337
					115715302	9.6717	161.265	37.729							115707212	11.6924	3.66033	31.5465		115714739	43.5874	4.5854	25.1481		115705001	44.1981	14.1905	17.2134
					115715307	1.76687	89.2271	13.6878							115707213	10.6522	2.68461	14.9126		115714740	1.64349	0.001	1.10901		115705011	751.55	211.26	371.574
					115715316	12.2622	32.5766	9.59639							115707223	10.396	4.20774	13.2173		115714781	6.91187	1.44734	7.52814		115705012	7.34823	0.001	0.001
					115715576	63.4329	73.1857	14.3167							115707209	8.81293	1.90885	13.6508		115714785	5.50355	0.857875	2.58585		115705015	5.78085	0.809217	2.02015
					115715579	34.5238	137.129	11.356							115707250	0.463552	0.001	1.52749		115714814	9.0884	1.07324	7.37678		115705016	2.48797	0.056758	0.001
					115715618	2.59896	6.8818	1.17478							115707258	0.0117117	0.09077	54.3968		115714867	24.1237	0.102273	15.5602		115705020	1.35552	0.001	0.367678
					115715627	11.4684	25.9646	7.50565							115707268	0.26837	0.0663337	8.20991		115714869	1.14768	0.316585	0.933238		115705021	2.21359	0.001	0.009462
					115715641	17.6984	86.8458	7.50343							115707272	26.259	35.4269	159.709		115714887	9.57487	3.40751	8.79296		115705024	45.5416	5.51311	14.8098
					115715650	27.8333	64.4147	8.90242							115707279	3.85763	4.39196	67.2255		115714889	519.371	237.97	550.111		115705025	4.63944	0.001	0.001
					115715656	7.63125	16.7878	3.35595							115707291	1.99935	0.568295	8.26794		115714919	4.41298	0.989396	4.10348		115705032	0.841191	0.085316	0.327773
					115715658	3.52056	28.988	3.12628							115707298	0.457412	0.515565	2.11014		115714933	2.94523	0.159417	1.63106		115705038	22.821	1.99729	2.84309
					115715671	1.72948	5.4714	0.906166							115707307	12.1609	17.6108	59.6836		115714956	12.5877	1.90164	8.43611		115705054	393.567	100.766	144.028
					115715680	8.62746	75.8546	24.4561							115707312	12.0533	4.36911	15.3845		115714969	10.4169	2.43763	5.91098		115705057	3.42469	0.001	0.001
					115715691	22.4678	29.3139	0.296161							115707309	4.64367	1.02503	6.27941		115714970	162.069	19.066	70.7081		115705058	29.4085	0.710875	0.219923
					115715706	6.56075	21.7236	1.34436							115707321	2.58416	1.90357	8.45453		115714986	9.83095	3.76985	10.2256		115705062	44.1627	0.0595843	0.0225473
					115715709	3.0615	20.9358	5.0205							115707329	34.1414	39.2968	85.3955		115714998	5.2323	1.08803	3.9124		115705068	0.926718	0.001	0.0232913
					115715710	6.97322	16.6698	8.18114							115707332	9.40261	12.5422	25.2862		115715003	12.7062	0.001	9.29906		115705070	2.43513	0.186095	0.573126
					115715712	0.199195	8.18595	0.427877							115707337	5.8784	2.90533	7.46054		115715020	18.8342	1.15018	11.7238		115705096	1.57668	0.275074	0.407049
					115715735	1.01405	1.16021	0.183673							115707345	17.7792	10.5783	37.9909		115715024	34.6674	6.20915	23.4194		115705099	0.98366	0.001	0.001
					115715748	6.49232	16.6517	5.88489							115707352	27.6105	27.1045	59.5582		115715069	7.55025	0.951016	5.24513		115705113	1.08959	0.001	0.08994
					115715771	22.9294	65.7152	6.296							115707405	8.08073	5.7937	18.6327		115715077	4.25082	0.894351	2.73396		115705114	0.861479	0.001	0.0898717
					115715805	1.40495	2.83183	1.12329							115707425	4.66479	13.6688	26.3677		115715138	1.43571	0.257152	1.27373		115705117	4.90645	0.281708	0.760391
					115715813	2.67966	13.3992	1.4026							115707459	19.6327	19.3429	49.1678		115715139	23.5983	6.65861	22.698		115705126	419.143	91.1325	189.925
					115715837	12.7608	41.797	9.72333							115707460	1.82513	0.616065	4.79074		115715151	17.4517	8.16625	19.4846		115705153	49.624	13.115	23.4098
					115715843	95.9053	157.835	44.5552							115707468	1.15995	0.88175	9.93675		115715166	0.806803	0.0692317	0.413292		115705177	16.5325	4.17964	7.11679
					115715873	3.03585	20.4038	7.88672							115707479	11.4164	4.69686	20.0547		115715182	1.69749	0.432462	2.018		115705180	18.3169	0.437138	0.392486
					115715920	3.4605	7.5991	0.282116							115707480	5.47761	7.07787	16.8363		115715218	18.0903	0.459485	20.138		115705183	97.138	41.7285	47.9517
					115715926	24.6101	162.996	26.3573							115707481	9.18664	11.8765	43.0932		115715220	31.0374	0.23951	11.5966		115705217	24.0016	2.09454	9.1826
					115715930	2.00463	71.9616	1.62466							115707482	2.54323	2.75187	7.79302		115715229	103.195	49.3255	106.542		115705219	6.21823	0.15386	0.3517
					115716022	28.5149	57.6275	19.606							115707491	18.7568	58.7068	107.27		115715262	7.76263	2.26903	6.35257		115705231	14.8088	0.620782	4.337
					115716023	4.38734	18.6657	5.44158							115707495	58.6293	74.7343	223.214		115715269	13.2364	1.45624	8.40955		115705239	10.3432	3.27391	0.499037
					115716079	55.4499	323.406	34.0852							115707510	4.60338	3.85288	9.47643		115715276	33.2057	7.8338	34.7777		115705237	3.60417	0.038178	0.203576
					115716101	4.51515	119.741	3.22463							115707515	20.2287	24.4325	217.768		115715289	12.8441	3.15947	7.91779		115705242	27.0385	11.5815	8.61926
					115716103	3.3902	25.2492	6.09668							115707529	2.7714	8.89456	36.0355		115715291	37.6577	16.8396	36.3429		115705246	2.24709	0.001	0.001
					115716157	0.505222	3.4738	0.001							115707533	10.8927	4.18051	13.047		115715327	1.34359	0.001	1.04455		115705259	10.1299	2.0581	3.34385
					115716162	9.42024	24.4678	6.00581							115707543	62.1592	3.1992	188.332		115715584	2.38889	0.57557	1.65151		115705261	8.73307	0.001	0.449314
					115716184	27.9159	137.985	12.5907							115707547	32.3109	14.6755	41.0581		115715591	2.84471	0.091365	3.12522		115705262	20.0957	13.5489	5.33279
					115716187	76.7478	247.465	16.9192							115707563	3.34397	2.97331	20.7608		115715595	26.5353	1.98701	24.0187		115705265	22.1304	6.93538	8.92711
					115716208	95.6691	346.418	27.8648							115707571	9.6592	0.809504	17.474		115715596	10.4417	1.51125	7.20458		115705269	1.21223	0.087824	0.281131
					115716252	1.23176	12.0063	3.76611							115707573	0.86522	2.16483	15.5349		115715610	40.9603	6.76755	24.5745		115705273	1.96253	0.218411	0.290947
					115716254	76.2926	293.671	10.9549							115707592	11.0363	18.1937	53.962		115715692	84.6311	11.6872	89.4422		115705277	12.5223	2.05254	2.12669
					115716276	90.152	309.324	47.3983							115707611	4.77491	1.53291	14.4663		115715745	2.0716	0.001	0.757727		115705282	2.17693	0.0561727	0.228454
					115716280	8.10689	13.4404	2.10832							115707631	11.2476	1.92292	17.9153		115715758	1.32964	0.0657897	1.7008		115705297	51.3377	1.24724	0.580898
					115716281	11.0332	14.8728	0.956352							115707633	1.56545	3.0944	7.0571		115715781	5.15905	0.226626	4.86837		115705298	10.6362	6.11813	2.10103
					115716283	1.01938	8.88153	0.387576							115707634	0.0434007	0.0720637	1.80308		115715786	6.44635	1.53241	6.20554		115705300	8.74053	3.36122	3.88642
					115716284	1.7605	23.9782	2.52945							115707638	3.51208	1.63928	10.7593		115715812	10.5596	3.82973	7.8397		115705308	3.24971	0.737301	1.54524
					115716292	39.3347	97.6143	14.022							115707643	26.7918	13.9134	63.9307		115715816	1.46827	0.001	0.955162		115705315	3.83801	0.001	0.125635
					115716353	65.5189	235.446	19.0824							115707661	2.13555	1.27923	5.54864		115715870	2.20747	0.310319	1.25963		115705334	12.3716	0.431175	0.581781
					115716364	16.4419	68.4925	19.6929							115707665	3.97791	5.25754	16.0463		115715883	2.04036	0.07154	0.806902		115705340	6.85756	0.001	0.186015
					115716432	0.749394	0.892892	0.0242083							115707683	8.07114	5.35731	17.977		115715897	1.96023	0.535704	2.02753		115705341	7.67876	0.001	0.48189
					115716439	3.7667	12.6034	5.14745							115707688	4.12926	1.18597	11.0445		115715912	9.03875	0.723574	4.47307		115705342	1.07483	0.215002	0.0878303
					115716440	19.3749	56.1119	15.2145							115707692	5.83026	0.001	63.175		115715986	2.77817	0.001	2.2703		115705343	31.236	10.6658	9.39845
					115716451	142.54	569.789	120.004							115707695	4.16153	4.30247	9.51507		115716007	75.6651	10.1437	34.3164		115705346	40.9933	7.08519	10.7628
					115716452	9.24431	11.5717	3.8611							115707697	14.1943	11.6623	32.0076		115716085	11.1526	1.72766	7.20071		115705351	5.17872	0.522263	0.335429
					115716465	0.484018	10.9825	2.66423							115707716	1.06857	2.56741	4.74482		115716090	75.3217	33.7567	72.1992		115705360	18.5799	1.79725	3.67371
					115716468	2.36709	23.0817	0.40389							115707726	61.3737	11.502	78.3356		115716121	39.8715	9.98479	27.3368		115705362	405.066	65.5559	26.1535
					115716472	70.2812	370.692	46.3731							115707734	3.85495	0.616329	8.89236		115716145	9.76547	2.82046	8.08549		115705363	6.79306	0.262449	0.554784
					115716525	13.5152	37.6356	11.8515							115707763	119.365	233.177	507.445		115716156	2.10929	0.001	0.832033		115705365	15.7297	0.11034	1.00506
					115716580	42.9329	225.193	25.5625							115707781	7.4046	6.19144	28.1379		115716159	2.39333	0.097203	1.49513		115705374	6.27	1.84521	0.3283
					115716609	37.6399	46.8586	14.5465							115707813	2.19424	0.0587473	64.1516		115716192	169.721	65.7941	141.477		115705372	18.6419	0.641024	1.38059
					115716613	25.3872	56.1128	10.1554							115707825	46.5143	11.6404	75.4384		115716201	262.412	100.261	251.088		115705379	36.4804	8.12213	9.17129
					115716614	3.60086	12.3899	3.1289							115707831	0.224346	0.032335	6.53032		115716233	556.637	209.187	518.107		115705404	25.9549	4.66056	10.184
					115716615	5.19628	10.8634	5.01103							115707837	26.9603	12.8416	34.7684		115716237	61.1977	22.1425	47.246		115705387	3.13758	1.23079	1.0437
					115716632	10.9173	24.6974	0.756077							115707864	15.1414	4.54139	23.1745		115716245	5.22697	1.59183	5.12796		115705437	11.095	2.88795	2.23554
					115716643	6.90397	24.2627	7.9128							115707863	27.4869	21.6012	62.8933		115716264	84.9634	37.0166	78.6675		115705443	5.51129	0.325783	1.18213
					115716653	3.24587	11.7725	4.75017							115707911	0.839318	0.001	5.39717		115716272	73.3661	31.1103	66.1736		115705444	18.3792	1.60201	3.86678
					115716684	14.1731	103.93	13.7898							115707913	14.2298	18.0819	921.768		115716273	39.3863	8.4068	29.9821		115705447	204.504	79.0621	100.938
					115716712	30.48	74.0723	10.4452							115707914	45.0676	16.8136	74.1475		115716282	61.8963	22.1594	55.8835		115705455	29.0238	0.198054	4.07219
					115716725	13.6763	35.3817	6.19275							115707919	13.3523	6.76553	152.165		115716287	40.6975	15.1011	32.348		115705470	2.33597	0.654184	0.634488
					115716733	6.52603	90.1043	18.7789							115707920	20.4063	24.1631	106.946		115716290	5.48991	1.77138	5.78963		115705523	10.9768	4.44796	4.67621
					115716737	7.8834	22.2461	8.25707							115707946	0.136745	0.001	3.15154		115716293	20.1525	2.81426	12.6971		115705526	15.9325	7.8651	6.87658
					115716744	1.16504	4.59191	1.08671							115707956	16.1001	16.2191	125.854		115716301	108.913	26.9898	91.4005		115705527	1.15206	0.194893	0.120717
					115716748	10.865	26.5901	4.5703							115707966	4.0401	4.24693	9.71501		115716318	65.0399	21.2355	68.29		115705533	5.41039	0.044399	1.22223
					115716757	1.04916	12.9147	2.96448							115707967	3.97233	3.73358	8.90719		115716360	28.6834	7.6484	21.1287		115705551	11.642	4.00393	5.55787
					115716763	6.04332	15.8064	4.45578							115707974	3.10303	2.99763	7.69652		115716373	11.2536	1.02223	5.17477		115705558	9.23094	1.09897	3.04582
					115716767	23.96	176.747	40.6971							115707973	15.5025	3.24771	24.535		115716406	39.9105	4.97267	26.732		115705565	5.93951	2.25377	0.556607
					115716769	58.1526	118.519	10.9435							115707993	6.20737	6.11883	20.5886		115716422	3.60897	1.52545	4.14013		115705569	119.454	53.4378	33.6448
					115716781	12.9546	55.015	2.62227							115708012	11.4725	5.09794	25.5343		115716429	16.3582	6.74308	16.3151		115705578	98.6023	2.40156	25.9962
					115716795	24.7667	90.8313	5.34466							115708013	0.908529	0.437963	2.07905		115716433	39.6773	14.694	33.849		115705602	1.26334	0.71044	0.181567
					115716797	123.035	247.731	60.8783							115708029	5.8088	2.00332	8.62703		115716455	4.74451	0.001	3.99895		115705574	14.0739	1.00467	1.50125
					115716827	3.62195	88.3522	3.50396							115708034	69.4641	59.639	193.024		115716529	26.5657	0.729226	11.6153		115705614	17.5502	3.5881	5.96969
					115716837	8.30075	21.9335	8.95332							115708057	4.34526	2.08952	5.45277		115716551	10.2943	4.47529	11.9772		115705624	461.413	32.6765	18.0078
					115716868	22.8329	57.8123	10.4255							115708058	0.785512	1.48173	16.5371		115716586	35.3307	15.7045	34.7672		115705642	50.4837	4.48488	7.58553
					115716874	37.8949	56.5581	14.8328							115708062	1.64418	0.001	9.77291		115716597	116.18	27.2427	76.5352		115705650	156.568	31.7343	51.6163
					115716934	3.8824	50.3331	4.07046							115708075	123.7	45.9153	171.868		115716601	19.7878	6.49122	13.2699		115705674	8.61538	2.09515	1.78233
					115716959	5.27763	26.8061	7.38946							115708085	191.927	52.2198	686.14		115716605	4.26563	0.001	2.52494		115705678	9.93854	0.747215	1.95715
					115716971	2896.01	7825.35	173.229							115708111	0.279435	0.001	20.0172		115716665	21.1846	5.21581	23.8182		115705684	106.173	0.190896	0.078644
					115716981	22.6543	34.9805	10.9343							115708137	0.505635	0.157017	1.83753		115716666	17.3784	5.03361	11.158		115705703	66.2162	4.48672	9.35344
					115717003	0.486031	2.55264	0.286382							115708135	4.28199	0.61955	31.9717		115716678	112.016	16.1853	102.3		115705706	152.934	51.2651	74.9147
					115717004	11.4299	48.7367	3.02083							115708138	18.1642	13.46	40.3417		115716686	83.9622	24.4065	54.6544		115705708	22.7852	8.7502	5.78662
					115717010	11.9159	17.6761	5.65092							115708139	17.077	2.44399	40.8931		115716690	6.09196	0.564404	5.34277		115705717	11.727	0.11965	0.001
					115717013	7.29748	24.5263	8.47572							115708151	0.327088	1.3559	9.60465		115716706	12.5892	1.58829	11.2589		115705733	7.30974	0.11905	0.962837
					115717033	0.032855	22.8464	0.618348							115708164	3.61609	2.64882	23.3523		115716711	36.458	7.82848	31.2254		115705745	2.63505	0.001	0.001
					115717065	9.15695	34.6523	14.8433							115708165	13.2573	1.25548	31.2884		115716717	7.14177	0.0441087	4.15214		115705746	5.20353	0.001	0.101032
					115717069	29.2914	160.886	68.7784							115708167	0.608077	0.001	123.165		115716749	2.12701	0.279548	1.88187		115705757	8.61354	0.001	2.20068
					115717087	3.2215	6.73199	2.52016							115708178	1.8994	0.341737	4.00446		115716785	17.9153	4.111	15.0815		115705759	44.2701	13.8361	8.25855
					115717101	17.7575	41.5164	3.05589							115708180	7.10056	3.54531	10.5479		115716809	24.8881	3.01123	12.9128		115705761	180.509	15.5594	32.5743
					115717164	58.2562	224.886	21.8324							115708184	6.49534	3.47369	13.1589		115716844	35.0762	10.3563	27.8943		115705762	12.4744	0.001	1.39628
					115717182	8.98545	32.6923	1.4509							115708188	52.7574	11.4892	67.6543		115716867	12.7562	2.79484	9.68278		115705767	9.5431	3.48597	2.25026
					115717228	10.7343	22.9052	10.7234							115708189	4.32678	4.60381	54.8718		115716872	25.9551	5.48437	19.4654		115705769	2.28279	0.144307	0.406574
					115717243	237.179	510.533	18.7054							115708192	0.255865	0.285688	1.79843		115716918	9.68397	2.77643	7.56275		115705776	1.56401	0.001	0.0553917
					115717254	4.29024	5.87701	1.91036							115708224	1.34077	1.58421	12.633		115716919	2.7835	0.04887	2.55625		115705785	3.33035	1.10418	1.35317
					115717257	1.47547	4.64714	0.230804							115708231	5.58665	1.36078	6.96239		115716927	25.503	1.89822	15.7682		115705791	2.68437	0.001	0.299617
					115717275	21.08	91.1386	4.12789							115708252	0.776421	0.910439	4.91943		115716933	13.499	2.40506	7.82429		115705795	6.79168	0.406643	0.63186
					115717311	3.86458	5.13758	1.90612							115708256	2.1831	0.669403	6.64462		115716940	49.5628	16.9315	41.1219		115705800	371.738	80.0808	126.968
					115717321	7.12704	14.0736	0.728465							115708264	1.69747	8.62672	21.9622		115716958	30.8703	5.77765	19.8231		115705805	1.81177	0.0851103	0.411228
					115717331	3.54141	33.2016	5.66597							115708265	0.980293	0.454625	3.8603		115717005	10.7176	5.03155	11.4356		115705816	21.2109	9.3356	4.97012
					115717339	14.5378	17.9981	6.07513							115708285	0.353294	0.130082	2.20968		115717050	193.707	29.8283	95.6944		115705828	11.306	4.05327	3.39587
					115717341	1.3507	11.6883	1.38314							115708302	1.66159	0.813995	13.3834		115717055	28.9834	13.3405	26.8722		115705836	26.9287	8.28995	7.83737
					115717352	4.46974	21.247	4.66932							115708303	1.09608	0.001	3.68758		115717063	9.59984	3.87653	8.4186		115705837	2.92975	0.0296887	0.0903113
					115717359	13.0253	38.1443	3.89014							115708331	0.592765	0.26593	1.15877		115717066	6.32719	2.13436	5.8113		115705839	9.03662	0.740539	2.41861
					115717366	9.5006	29.4949	10.0187							115708338	1.61205	0.591044	12.0699		115717086	14.1826	5.03939	13.7402		115705840	44.131	4.68734	0.117788
					115717377	13.2533	64.8558	10.4458							115708345	3.06071	0.0157603	11.9706		115717111	9.87119	2.87677	8.34419		115705841	3.4534	0.176501	0.778462
					115717421	336.859	1337.53	463.389							115708349	1.18852	1.0315	5.88909		115717134	20.594	9.46298	20.3546		115705843	20.9386	3.41738	3.0306
					115717442	4.76545	26.4561	2.61134							115708359	0.688399	0.757667	1.88852		115717135	6.63137	2.15998	5.06458		115705851	2.86159	0.989993	0.297922
					115717453	29.4489	60.3285	4.83951							115708648	0.33919	0.424261	46.33		115717153	15.8333	5.25411	13.2929		115705861	22.0009	6.17688	3.5899
					115717636	142.11	501.634	87.3573							115708650	0.89412	1.26755	2.93826		115717200	15.5769	2.85514	8.73727		115705871	15.7675	5.94041	7.72718
					115717728	0.151503	1.20082	0.09636							115708652	1.62277	0.17913	2.35548		115717217	16.5129	4.86723	12.0191		115705924	21.9454	0.60677	4.87152
					115717835	1.67879	12.0037	2.29303							115708653	18.3466	31.0657	63.5065		115717236	2.51457	1.20555	2.74291		115705929	7.62524	2.4303	2.6138
					115717971	1.60845	1.84871	0.425168							115708661	2.65724	0.373386	4.86616		115717285	26.8267	13.3936	28.1888		115705934	12.1372	0.341763	0.0880153
					115718142	71.3328	174.024	15.1484							115708674	5.02013	0.429365	8.40222		115717296	35.9413	7.31544	40.0704		115705982	1.44883	0.060659	0.0102593
					115718146	0.768876	9.55436	1.92456							115708679	1.31858	0.206278	24.4285		115717303	40.2096	8.89378	42.1069		115705985	3.85814	0.174382	0.0177107
					115718171	4.30248	20.394	0.550017							115708682	3.03182	0.916903	6.59114		115717314	21.3888	10.0979	20.8293		115706008	22.2544	1.36222	5.49562
					115718172	10.7077	34.1118	5.22014							115708662	4.48404	0.365052	16.0165		115717347	59.7348	5.61015	41.8682		115706016	12.4779	3.19976	2.70844
					115718410	9.8079	39.5216	2.06188							115708703	12.8735	0.205542	26.9003		115717438	14.7871	4.95674	15.1172		115706018	3.86535	0.326824	1.32944
					115718439	0.782013	5.29861	0.969373							115708710	0.001	0.001	1.69343		115717452	12.0739	0.12685	6.99868		115706025	6.96548	2.98296	0.29055
					115718093	3.57888	28.306	5.12397							115708721	3.20168	1.12684	6.33103		115717645	35.9356	15.2728	40.4619		115706036	6.02978	0.138883	1.18048
					115718474	4.4877	16.7156	1.23068							115708722	0.350677	0.0163557	2.64025		115717999	1.68383	0.0482337	0.934829		115706051	5.42011	1.26869	2.42259
					115718476	2.7026	53.1589	6.14676							115708733	2.36519	0.900993	3.00694		115718143	3.21381	0.363782	3.37429		115706050	6.68529	3.22993	0.544615
					115718490	12.5324	28.9074	6.76737							115708735	0.734934	0.0657227	9.51324		115718184	1.83007	0.178364	1.94384		115706065	11.0424	4.18476	3.22878
					115718504	53.5951	87.1992	9.18963							115708744	5.99048	0.486475	8.6399		115718402	6.95345	2.31564	7.61332		115706071	15.0669	0.44559	3.10832
					115718534	34.9845	45.3898	12.4981							115708754	5.5005	1.22917	7.10883		115718429	3.03298	0.237724	2.99595		115706097	3.329	0.915484	0.609175
					115718564	20.3246	156.911	5.93131							115708759	1.44562	0.630572	2.34448		115718441	20.1731	7.03981	14.8098		115706103	32.1811	7.98191	6.12609
					115718599	63.0035	238.772	3.68506							115708762	20.5755	21.6703	174.184		115718495	37.3047	5.2355	40.6746		115706117	64.1076	0.823219	0.79373
					115718636	2.91513	13.899	4.28511							115708767	18.1502	6.00841	114.187		115718497	2.35142	0.083149	1.15797		115706132	3.22097	0.0531103	0.160138
					115718648	8.96728	22.2718	9.37278							115708768	3.06529	0.13709	5.61251		115718520	26.4723	10.3023	27.931		115706133	4.17538	0.001	0.001
					115718740	13.277	149.159	2.28353							115708776	1.5309	0.320659	6.04341		115718570	2.19015	0.0377113	1.40642		115706147	4.47543	0.643353	0.827059
					115718750	2.16047	5.70592	0.353544							115708777	0.0195073	0.939191	3.97359		115718585	5.46038	0.341318	2.29469		115706175	104.24	5.09828	4.97706
					115718777	2.03511	37.7294	12.927							115708806	0.884845	0.001	2.65606		115718640	1.15861	0.408437	0.979861		115706178	134.304	0.58862	3.39583
					115718791	35.0749	142.564	52.0798							115708820	0.08788	0.722231	7.03194		115718659	3.81825	0.524078	2.29509		115706183	21.996	3.3586	5.04727
					115718794	7.24618	311.904	29.0201							115708821	1.42391	0.369098	3.44732		115718709	7.16926	1.96461	6.37111		115706186	47.6932	10.8758	23.3014
					115718806	7.76316	17.1717	0.608096							115708827	2.70512	0.279984	4.20996		115718731	14.0256	2.89361	7.15538		115706187	2.64411	0.001	0.132822
					115718881	13.5427	32.0082	14.6291							115708840	0.279628	0.200733	2.67869		115718760	12.4691	0.796505	12.235		115706192	18.8603	12.4111	3.91702
					115718911	26.3509	86.1976	29.0668							115708841	2.57384	1.93633	24.9081		115718843	48.6777	16.5234	35.6816		115706204	44.2957	7.54687	8.80353
					115718932	26.9512	170.463	17.7868							115708861	0.252355	0.079114	2.21573		115718869	53.4232	2.42216	47.4101		115706217	13.7352	3.22691	4.05928
					115718945	13.9218	48.9172	9.62064							115708874	0.151926	0.001	1.67393		115718888	12.945	3.10622	10.8178		115706225	388.727	187.269	43.7014
					115718950	6.69768	18.955	7.43727							115708894	0.723003	0.130546	38.9494		115718931	11.3589	2.42677	12.776		115706265	76.0398	28.1417	30.0213
					115718955	55.7676	213.505	83.8095							115708895	0.396152	0.001	1.7131		115718940	3.97759	1.05342	2.80719		115706271	4.69082	1.48757	0.542452
					115718993	9.25314	38.2848	6.46144							115708900	0.713605	2.52231	5.45095		115718944	2.4096	0.292437	1.59962		115706277	6.21064	0.739393	1.89737
					115719019	50.8259	319.858	52.3937							115708902	0.345214	0.035775	12.0049		115718973	25.7817	5.18708	15.1513		115706290	26.3304	11.523	11.2163
					115719033	133.148	1116.41	157.109							115708908	6.11374	0.715715	28.5707		115718978	37.5319	11.8311	33.9108		115706295	466.998	142.361	206.539
					115719040	267.442	909.9	100.02							115708910	0.187746	0.001	14.6255		115719005	1.7154	0.277113	1.08556		115706296	5.54393	0.0343563	0.406267
					115719042	58.7779	121.011	29.551							115708929	0.152646	0.047179	1.18806		115719061	25.639	6.10784	14.9302		115706309	7.80841	1.12592	0.103911
					115719138	2.51126	12.1166	4.13048							115708930	33.428	9.87964	410.685		115719065	26.1785	9.78044	21.4637		115706314	190.291	51.7372	85.1529
					115719149	0.779288	0.88932	0.0208893							115708939	3.1368	6.72094	10.3284		115719069	38.0466	18.184	37.2636		115706319	11.2074	2.66302	4.96926
					115719169	1.33089	5.23947	1.84591							115708966	0.60078	0.001	1.18774		115719070	7.1005	1.20454	7.64497		115706323	335.028	135.471	153.324
					115719246	130.146	356.08	50.6016							115709007	1.04403	3.70524	6.46858		115719086	111.633	21.3943	65.8247		115706324	1.19288	0.15745	0.339625
					115719252	7.92753	20.6162	9.37527							115709009	353.707	71.2439	526.048		115719118	20.1535	6.00788	22.8923		115706345	5.76502	0.001	0.762371
					115719253	36.0004	98.2984	33.873							115709034	20.5686	7.44914	250.911		115719141	26.108	3.61292	13.8785		115706351	5.01052	0.670652	0.501691
					115719261	30.1486	130.591	44.3975							115709035	1.5986	2.41825	23.5701		115719171	29.2733	10.9064	21.8877		115706367	12.6558	4.66036	5.26032
					115719266	7.53088	53.55	6.69786							115709049	0.12017	0.0559923	2.25204		115719199	5.51384	2.16207	4.68911		115706370	35.3801	1.72117	7.15892
					115719271	10.4182	26.4999	7.57127							115709071	0.340999	0.0740207	2.35174		115719217	0.978163	0.001	0.600475		115706373	9.41293	2.70351	2.30719
					115719274	7.30819	19.6762	1.40144							115709085	0.165648	0.001	2.79045		115719243	26.3566	9.35114	19.7336		115706380	4.56831	0.045096	1.14444
					115719275	1.01902	83.2629	5.47041							115709109	60.3388	1.9501	142.812		115719249	41.4877	15.8012	45.228		115706384	104.888	22.8904	23.0456
					115719301	24.8943	75.5487	26.3243							115709153	5.42044	1.62792	24.9133		115719285	27.9336	13.8724	28.7709		115706388	2.67902	0.19867	0.727519
					115719302	0.265435	2.25251	0.0347777							115709154	8.65345	8.37636	31.5219		115719287	69.3536	18.8431	38.5722		115706393	6.17772	0.490163	0.170194
					115719303	12.0693	43.2598	8.86522							115709164	0.269582	0.363559	1.71616		115719326	109.364	41.9066	94.2419		115706394	1.44972	0.001	0.0968243
					115719308	8.92172	63.6338	9.91573							115709186	1.72655	0.792626	3.88983		115719358	39.3847	18.5258	38.1271		115706421	352.492	0.27178	43.992
					115719351	60.9589	184.724	61.1866							115709188	1.21332	0.262872	2.26112		115719362	421.718	156.31	334.569		115706418	9.91207	0.51393	1.73921
					115719379	35.592	105.473	19.7649							115709190	2.71897	0.647847	4.25666		115719367	151.144	73.8476	168.244		115706425	6.90028	0.518756	1.18357
					115719395	28.7494	47.1957	12.891							115709191	5.32636	1.99329	7.93824		115719375	5.66741	1.93949	4.73498		115706431	4.03296	0.142264	0.017111
					115719427	18.0733	89.9821	17.2641							115709193	2.08543	0.716536	3.06025		115719381	412.026	120.448	278.129		115706438	52.4294	18.0027	16.4277
					115719514	23.1751	54.2942	18.7404							115709238	0.305845	0.001	1.20161		115719397	4.21347	0.0984543	2.43151		115706442	259.832	67.9168	117.335
					115719537	7.02658	12.0258	3.0598							115709242	3.19046	4.58225	9.17001		115719400	35.288	7.08518	17.9669		115706454	9.20302	1.11286	0.138701
					115719559	34.0534	52.9035	13.2824							115709252	7.73897	17.9798	31.3369		115719406	19.7196	6.11334	21.7757		115706476	13.8847	4.2625	3.96435
					115719564	1.5519	7.72386	3.13158							115709263	0.885327	0.195408	2.00626		115719416	19.7003	3.35038	12.2569		115706480	35.2254	0.269847	0.275259
					115719599	11.0899	77.4312	26.6718							115709264	3.94633	5.09085	23.5229		115719435	42.9769	11.593	44.9743		115706483	29.0494	1.09729	1.41683
					115719612	119.406	258.078	14.9619							115709282	8.11288	5.78932	100.153		115719441	13.1171	0.87964	6.12842		115706491	35.7449	12.0985	0.534112
					115719615	48.5641	471.795	59.2104							115709293	4.17238	5.18323	20.3165		115719452	14.1291	5.51493	12.3373		115706494	16.4686	0.0821083	2.02962
					115719630	743.814	845.177	148.287							115709300	0.492265	1.0102	40.4316		115719463	325.128	25.7384	217.479		115706498	9.35283	0.0718083	0.066009
					115719712	42.0391	95.8458	41.5965							115709308	0.233006	0.241659	0.958173		115719474	4.25933	1.72709	4.34077		115706518	5.8022	1.13367	1.266
					115719763	266.128	581.129	74.7558							115709322	22.5181	10.2031	28.2923		115719506	36.1552	6.88436	40.7768		115706528	19.4405	0.0545963	0.0511933
					115719777	14.7209	48.7566	12.0029							115709324	81.0116	39.2188	119.745		115719508	13.7195	2.69129	10.534		115706546	52.6497	9.9494	17.8408
					115720381	1081.91	3791.82	272.565							115709345	8.16593	1.87235	36.5855		115719534	55.3919	21.8295	48.1369		115706548	13.3806	5.571	5.94224
					115720385	0.141404	5.11679	0.070639							115709356	4.9059	1.27441	7.42398		115719574	36.8807	6.38471	17.3721		115706562	1.37491	0.001	0.390218
					115720594	6.04613	7.86598	0.290974							115709374	3.15682	3.48048	7.33996		115719643	15.5724	5.68722	15.3437		115706565	59.7269	1.03579	4.13767
					115720621	54.7684	192.231	43.7509							115709383	4.03181	1.51714	7.3601		115719657	22.6993	6.65102	16.9069		115706572	11.77	0.803072	2.03046
					115720648	158.057	556.873	29.4966							115709392	12.6561	2.3454	24.2384		115719681	5.82714	1.67717	6.24774		115706575	20.6915	4.55441	6.61037
					115720676	55.617	195.708	90.204							115709419	23.4758	1.34401	64.316		115719683	4.148	0.160493	4.97035		115706606	23.1438	7.77678	11.4228
					115720677	8.12798	23.9258	1.95513							115709434	1.61702	0.293126	87.4988		115719696	2.26584	0.372251	2.64777		115706609	5.38302	0.001	0.001
					115720690	10.5292	15.2294	5.1498							115709438	35.3364	16.7833	126.857		115719708	33.6053	7.38048	32.5604		115706617	1.46072	0.001	0.043988
					115720722	17.8504	64.8828	17.6467							115709447	0.290558	0.0134797	1.39183		115719714	19.7858	2.58571	22.4808		115706622	13.783	1.5466	1.38915
					115720743	8.04342	72.8418	3.66886							115709448	0.435008	0.001	1.23799		115719737	272.55	97.2875	240.746		115706629	2.80271	1.07366	0.677675
					115720755	8.85697	12.1163	3.55604							115709480	13.5772	13.3572	38.4128		115719751	30.7592	9.15183	27.8321		115706665	4.61916	0.698302	1.83818
					115720766	1.7894	8.98178	0.459422							115709481	1.22795	3.9177	9.74512		115720163	138.924	32.9424	77.4701		115706708	1.18883	0.001	0.001
					115720784	4.25118	18.5363	7.89888							115709482	0.110468	0.0655563	0.945162		115720436	7.23665	2.27651	5.23092		115706715	38.6048	15.511	9.98849
					115720804	0.195782	1.80238	0.651204							115709500	1.15691	0.95538	2.89003		115720474	2.05414	0.425799	1.31359		115706749	17.5706	4.2287	1.65752
					115720835	1.9249	9.67607	3.7129							115709511	1.46534	1.14909	4.19854		115720540	16.2309	1.00681	19.6962		115706756	2.31481	0.0591027	0.001
					115720837	1.54605	34.0306	1.40225							115709537	1.38518	0.892358	3.07503		115720574	131.109	31.5373	90.6284		115706772	3.91504	1.12856	1.35765
					115720850	366.071	652.425	47.0048							115709548	3.82873	0.421644	10.6635		115720583	24.3138	11.348	27.6194		115706775	7.4604	2.48199	1.01504
					115720876	13.9302	48.2332	14.29							115709554	23.0509	7.41964	34.5865		115720589	11.734	3.62894	7.80571		115706781	4.31483	0.365799	0.848725
					115720918	580.674	1138.49	72.6352							115709564	6.5079	5.00252	63.8868		115720590	25.5046	9.47813	24.615		115706782	7.44405	2.01035	3.4669
					115720924	9.04436	102.853	11.3956							115709580	5.75399	2.83615	9.44146		115720619	16.329	4.08718	14.3172		115706798	7.71158	0.001	0.0458953
					115720966	30.7017	87.1261	32.3582							115709587	0.413653	0.001	0.851055		115720623	13.9701	3.00263	9.84259		115706808	47.2742	20.8854	1.78357
					115720991	8.37364	19.8336	4.92403							115709595	9.05853	4.23856	15.1575		115720702	7.73284	0.403813	6.23921		115706834	29.2236	6.02796	13.0794
					115721003	31.9976	148.371	60.7423							115709608	13.02	12.7862	29.7559		115720729	3.10781	0.946265	3.23086		115706835	13.1879	0.001	1.59234
					115721008	6.39046	7.82429	1.20339							115709609	0.167685	0.21273	14.3308		115720730	3.58345	1.23852	3.86697		115706851	12.1515	2.00376	3.22003
					115721056	10.8334	28.7304	4.53495							115709614	18.5103	14.2638	37.7538		115720753	41.6905	12.0624	29.4454		115706861	77.0549	5.11361	16.992
					115721064	0.734868	9.50785	3.29471							115709625	2.5583	1.80202	6.68293		115720765	51.7272	9.64568	31.9365		115706869	42.6506	10.5401	14.2049
					115721071	117.166	331.747	28.2269							115709626	2.30107	0.203472	3.53933		115720800	7.1385	0.001	2.67256		115706872	9.96119	4.67392	4.64479
					115721166	5.22967	11.9649	4.51931							115709629	12.5319	6.26135	17.6871		115720881	9.2629	3.66971	10.5652		115706896	32.4051	3.5247	11.9424
					115721176	1.31977	4.45193	1.67598							115709634	0.0410383	0.163657	0.811614		115721020	2.71585	0.596042	2.33871		115706905	6.25402	1.53318	2.1012
					115721178	8.32246	61.8201	2.73667							115709642	1.51691	0.304803	8.45971		115721051	2.81709	0.578062	1.91379		115706913	5.54927	0.032711	0.33896
					115721180	3.80802	38.7008	1.43738							115709658	21.36	9.81686	25.8532		115721057	1.59179	0.571925	1.8184		115706914	18.862	4.19953	7.69487
					115721182	11.4436	60.5036	8.3746							115709672	409.365	439.332	1023.65		115721107	6.52988	1.5962	5.88676		115706915	6.24189	0.733047	2.24895
					115721225	2.10889	4.72659	1.63367							115709691	30.6756	19.3683	136.714		115721108	5.79286	2.06456	4.90427		115706946	241.339	12.7644	3.857
					115721231	4.83246	12.4533	1.46182							115709692	18.6701	20.4614	70.6968		115721191	1.07017	0.211758	1.11232		115706950	156.452	7.53749	2.16666
					115721277	21.0723	54.3061	23.6275							115709701	0.335664	0.142183	2.77756		115721250	7.07042	2.6724	5.58963		115706962	159.404	51.997	66.0911
					115721284	27.7256	38.6911	12.3523							115709704	2.5303	1.74425	7.06556		115721265	5.03674	2.32273	5.64281		115706994	4.96286	0.418558	0.421677
					115721294	33.3478	109.127	26.7806							115709717	5.67225	1.22398	10.8825		115721280	2.52399	1.21182	2.80641		115706999	30.0024	10.1249	12.6721
					115721297	6.1572	12.3385	5.33446							115709725	0.407999	0.428603	1.12573		115721286	2.41997	0.421252	1.56403		115707010	10.8392	2.00601	4.27204
					115721300	4.37578	34.784	4.6473							115709733	2.29434	0.714177	3.24988		115721312	3.58702	1.21102	3.85507		115707075	114.431	17.3203	32.9561
					115721304	9.90528	33.9779	11.8498							115709741	3.67774	1.3707	4.41923		115721318	3.78826	0.693575	1.92178		115707091	2.62616	0.1259	0.269341
					115721314	5.40218	8.13858	2.45922							115709750	5.32285	13.1431	21.8104		115721331	23.5269	4.39767	13.2794		115707094	8.21232	2.06797	1.71772
					115721329	28.228	106.557	7.29119							115709769	11.1568	4.46982	25.7314		115721363	3.23285	0.289689	3.92912		115707106	3.15234	0.001	0.158419
					115721350	6.73091	24.8482	3.77452							115709768	29.4687	66.7438	123.696		115721388	63.2384	8.53393	75.8407		115707118	28.312	2.78806	11.1277
					115721369	3.88571	18.6959	3.09989							115709772	8.66355	8.89332	21.5082		115721391	12.1106	4.7522	10.3705		115707124	32.3669	12.1826	13.8396
					115721401	5.55845	16.3208	4.72338							115709800	4.51052	0.826984	9.28367		115721694	5.13073	1.8831	4.05642		115707129	2.00571	0.001	0.0224377
					115721402	14.8147	84.6989	24.896							115709813	1.6648	1.3838	4.4697		115721700	3.31016	0.934679	3.98387		115707135	5.16529	0.001	0.001
					115721731	3.11827	66.1002	2.83464							115709843	1.80206	0.482185	2.58108		115721728	1.90333	0.525568	1.35819		115707136	13.789	0.001	0.001
					115721750	0.362014	1.70012	0.679459							115709844	7.70371	7.86729	24.4696		115721743	5.49255	1.81742	4.20714		115707141	19.2674	0.345253	0.0345633
					115721847	1.93368	8.11819	2.64231							115709845	0.704684	0.632537	2.02394		115721778	11.7431	0.394584	7.24254		115707151	249.38	60.8689	111.055
					115721852	13.2355	22.5471	2.02528							115709869	0.095323	0.001	8.03846		115721787	4.09725	0.641476	1.98179		115707172	4.73213	1.44878	1.60294
					115721865	7.47007	19.9502	0.784899							115709873	2.23992	4.78847	7.44026		115721823	6.62619	1.75977	4.50363		115707182	30.7694	7.62751	3.45944
					115721871	0.997765	1.58686	0.206713							115709879	17.6468	6.56434	22.6943		115721830	25.4023	1.45735	16.0006		115707185	112.661	4.65245	3.39291
					115721873	5.29717	12.6957	5.15336							115709883	35.9682	24.55	87.3822		115721851	13.456	0.001	5.24646		115707204	55.4106	0.630643	1.09848
					115721879	8.76347	12.8771	2.08465							115709911	9.23419	38.397	67.2491		115721860	383.655	191.426	385.236		115707208	4.53713	0.15916	0.397241
					115721916	3.58857	24.5786	8.02939							115709916	7.8962	8.09643	26.6391		115721863	7.89074	0.371831	3.90296		115707221	7.01476	2.15086	0.804915
					115721935	0.581062	1.76157	0.0503273							115709949	16.0333	12.3607	46.5151		115721936	3.54084	0.249222	2.25252		115707224	10.9606	1.09963	1.19899
					115721965	6.12231	48.269	11.4914							115709950	3.56099	3.05427	12.0367		115722078	30.7576	2.58432	19.7575		115707234	11.9287	0.001	0.001
					115721985	2.19341	10.3732	4.022							115709962	13.4499	5.10375	20.1534		115722084	105.536	42.9416	117.401		115707236	28.6444	6.97374	12.5066
					115722043	1.4844	3.04758	0.00952133							115709972	1.3816	0.688399	34.5923		115722125	14.4175	6.27832	14.9067		115707243	31.4133	10.7316	4.62375
					115722111	1.98152	2.41918	0.461549							115709980	0.669584	0.535388	4.25263		115722127	194.884	50.797	136.341		115707260	1.74418	0.0929173	0.403169
					115722134	8.44649	9.57088	3.46982							115709983	3.03676	2.49293	9.18355		115722159	12.0616	5.65175	13.8619		115707266	35.8192	12.6172	9.73733
					115722136	0.001	3.07581	0.001							115709984	0.929018	0.001	3.60277		115722164	13.4081	1.60035	8.1364		115707269	18.7227	7.59208	9.36011
					115722157	6.74405	33.0589	2.42734							115709985	2.35419	0.893876	3.44573		115722185	37.1103	11.9757	26.1823		115707270	6.89326	1.55355	3.44095
					115722189	17.5008	96.569	29.6004							115710014	10.3807	3.84736	15.8174		115722200	4.68117	1.0816	3.58559		115707277	39.8709	8.44165	15.9046
					115722196	363.844	1005.64	64.0693							115710024	9.14803	8.28628	20.5392		115722201	10.2912	4.90128	9.80961		115707287	2.7658	0.0711313	0.001
					115722214	4.74193	5.40668	0.36377							115710026	4.02814	0.093997	6.28488		115722209	44.5958	3.12086	30.1591		115707299	10.1228	0.579741	0.990459
					115722227	17.9928	46.0336	13.7424							115710041	0.656429	0.001	0.980978		115722212	3.71492	0.22574	2.15188		115707301	163.754	53.0184	70.3504
					115722232	23.558	26.1935	4.25063							115710045	0.582369	0.235447	1.99549		115722216	31.62	9.76651	19.5508		115707305	6.69272	0.242012	0.384649
					115722246	19.604	38.5095	7.92579							115710046	1.3557	0.011288	2.84771		115722221	21.6661	3.2444	14.4814		115707310	119.32	42.0061	55.0166
					115722248	23.1774	70.3513	16.3496							115710044	0.360543	0.190585	37.1679		115722230	22.4792	1.62816	21.0018		115707323	34.3998	10.7762	8.70149
					115722270	25.1042	146.691	7.74168							115710054	12.8234	15.7364	32.4693		115722234	4.34355	0.047475	1.72826		115707333	26.0968	4.70318	7.11664
					115722281	7.72795	103.888	9.94548							115710072	24.1077	19.2416	77.6693		115722243	16.8459	3.6993	8.45422		115707339	19.6321	4.18398	7.9013
					115722323	7.56086	10.4567	0.527766							115710080	0.422819	0.108227	6.39525		115722247	244.812	75.039	169.754		115707340	93.59	27.1692	27.8911
					115722350	2.00867	2.8375	0.924251							115710082	0.213927	0.704699	2.05877		115722251	53.6222	12.5491	35.1614		115707353	2.9121	0.155283	1.0701
					115722384	29.0407	84.5779	35.2352							115710102	0.265069	0.485145	2.52886		115722262	29.2665	9.67459	21.227		115707359	25.2478	7.66454	8.90641
					115722394	4.54584	9.70709	0.903894							115710103	1.30904	1.34245	9.65586		115722271	69.2747	22.1353	57.4858		115707360	26.5552	11.5996	7.54935
					115722405	2.64133	8.64232	0.216344							115710110	3.04469	3.6078	9.5207		115722275	12.709	1.92737	9.4737		115707361	4.2	0.366932	1.03138
					115722407	18.2812	38.3311	3.30354							115710167	1.10665	0.200101	1.82838		115722292	27.2835	7.21973	14.8835		115707369	89.0227	14.1284	10.2129
					115722431	0.569576	1.75111	0.0780643							115710189	19.4232	18.4285	52.4436		115722296	26.3147	10.2754	26.4974		115707370	60.1742	20.0594	27.3959
					115722432	0.273532	1.77636	0.0418633							115710216	1.6179	0.085491	31.4727		115722383	4.67109	0.36595	3.48004		115707374	123.77	4.12055	4.3945
					115722443	5.53454	18.5374	7.38456							115710227	28.4049	58.3885	116.713		115722390	4.72055	2.27232	5.02351		115707378	31.6578	10.1417	11.7498
					115722444	2.21163	9.76337	3.20884							115710234	0.543176	0.001	1.69407		115722391	3.796	1.60647	4.00332		115707380	47.334	11.1532	19.8235
					115722454	3.83525	10.5157	0.99536							115710238	8.38995	7.94207	30.372		115722395	841.69	210.275	826.124		115707383	16.7169	2.32766	6.6321
					115722455	4.32914	10.0862	1.44793							115710247	7.24689	7.29967	20.3267		115722406	56.3096	18.8145	42.2491		115707391	44.592	0.0598803	0.001
					115722476	0.849705	4.20732	0.420353							115710258	7.91934	1.76124	10.9033		115722438	3.10286	0.565735	2.4249		115707393	1.57817	0.0564693	0.091677
					115722491	278.394	808.404	85.6535							115710259	0.69483	0.148906	1.41868		115722445	7.30995	0.203236	4.30211		115707414	43.5762	0.751899	0.405957
					115722501	9.72675	12.6769	3.40892							115710260	0.373958	0.141461	2.83055		115722477	9.4556	4.71386	9.80308		115707418	4.51377	0.554859	0.0676543
					115722553	13.6026	96.813	32.8786							115710276	1.33226	0.001	2.0916		115722490	27.7828	9.0602	22.4604		115707429	4.85109	1.2007	1.41124
					115722556	33.676	115.201	4.35763							115710302	72.413	57.0037	235.723		115722523	327.755	89.4427	395.419		115707431	2.28636	0.001	0.001
					115722569	17.8777	35.8249	13.6021							115710308	0.296899	0.001	6.30613		115722547	27.4236	7.19134	18.6939		115707435	19.4477	3.82626	7.34717
					115722596	20.0281	65.5286	16.5235							115710327	27.2011	7.65567	56.8928		115722563	69.9099	20.622	46.1115		115707440	4.46535	0.001	0.001
					115722741	4.61349	15.0051	4.76809							115710330	3.11945	0.777271	22.3392		115722638	2.24249	0.001	1.47249		115707446	23.9384	0.125749	1.37386
					115722760	0.684444	4.78317	1.00877							115710343	0.281287	0.001	8.54841		115722639	24.5252	4.63566	24.1095		115707450	52.4613	13.0984	4.07255
					115722761	0.797562	2.37692	0.691857							115710354	4.29223	2.53968	62.6741		115722645	2.33184	0.518373	2.64452		115707458	1.13703	0.001	0.0213153
					115722763	13.364	90.3132	30.5097							115710352	2.76235	2.33106	5.67813		115722662	11.0999	0.071634	6.24548		115707483	3.25093	1.29903	0.793919
					115722773	39.9855	53.5458	19.7872							115710365	13.5056	1.90333	17.1209		115722643	9.00835	1.12035	10.5416		115707489	18.986	0.701496	1.19417
					115722778	27.6326	97.5691	2.13336							115710391	9.3978	15.2702	74.4969		115722692	24.4077	4.12202	11.898		115707488	1.7215	0.001	0.001
					115722792	13.633	18.6516	4.44556							115710435	0.0372347	0.156457	2.42464		115722705	29.2689	4.22795	15.5919		115707496	116.745	5.79502	17.4419
					115722804	3.67544	8.63205	3.32093							115710470	8.15494	8.44486	17.7613		115722716	60.7052	23.2728	61.3583		115707499	14.1158	5.77234	6.00376
					115722853	3.29493	3.72145	0.717176							115710473	4.55915	0.001	7.08138		115722735	10.4035	2.34858	6.17486		115707507	282.077	78.5164	135.221
					115722864	58.1973	249.113	62.0663							115710554	8.41807	18.7313	42.2474		115722764	109.967	30.3717	129.952		115707511	5.88596	0.833397	0.911093
					115722892	8.72066	19.8684	5.50617							115710561	13.3353	6.22379	17.8571		115722767	17.0855	7.08435	16.0271		115707516	5.43924	0.162653	0.810843
					115722900	25.6498	88.1709	19.7035							115710575	527.932	292.308	1155.49		115722780	58.7701	17.2518	44.245		115707537	4.69463	0.438816	1.73955
					115722940	74.8005	389.401	47.8115							115710644	84.3523	8.76378	265.376		115722788	24.4257	9.36565	18.8801		115707546	7.59666	1.67254	2.36461
					115722945	15.5203	42.3689	1.21732							115710654	0.001	0.001	2.00262		115722819	11.9996	3.39334	8.51768		115707548	6.33864	0.244873	0.128292
					115722960	28.8561	41.8082	1.54059							115710739	1.29064	0.105981	1.70859		115722833	5.30537	0.408125	6.24262		115707554	725.214	0.40165	5.82964
					115722971	2.6856	15.3075	5.55094							115710758	9.75195	7.82422	41.4976		115722840	1.46832	0.001	0.543943		115707556	330.492	0.156544	0.062639
					115723004	1.09553	29.3569	1.11969							115710792	5.12275	3.16076	12.2576		115722851	8.20189	2.44299	9.38622		115707560	2.32627	0.001	0.001
					115723009	6.1779	7.94398	1.02565							115710810	8.85803	4.14281	10.9074		115722909	84.1246	35.5956	78.8924		115707570	40.7176	0.001	0.198469
					115723010	9.45642	20.5292	2.52818							115710836	0.0943187	0.001	0.877841		115722916	12.1817	0.660853	8.94697		115707574	416.65	1.49343	0.655102
					115723011	23.4952	63.9464	21.6007							115710860	21.3007	25.6815	52.8916		115722939	33.7437	11.6414	27.3316		115707575	29.9049	2.16817	9.15949
					115723019	5.37881	17.9118	5.69383							115710887	0.862703	1.32084	4.84267		115722950	5.67915	2.38234	5.42903		115707587	170.03	75.4042	71.5479
					115723040	31.0796	91.856	38.2146							115710927	4.51616	1.58438	19.1884		115722952	407.065	99.452	220.512		115707597	4.69009	0.083574	0.11354
					115723044	1.08944	22.7482	1.04481							115710988	7.10812	6.16781	15.0134		115722980	16.0588	6.0771	15.8884		115707601	4.70195	0.821231	1.56729
					115723046	0.526106	17.7104	1.18717							115711003	0.474979	0.513519	1.72841		115722986	0.948207	0.001	0.55695		115707607	3.86728	0.42338	1.39732
					115723049	14.1029	34.4916	9.19842							115711014	0.607192	0.480708	3.02892		115722995	2.56985	0.126391	2.51794		115707620	674.22	176.168	277.861
					115723093	13.9008	27.3177	2.88516							115711048	0.0750513	0.616585	8.19308		115722998	39.6566	17.6836	41.2786		115707630	5.32088	0.623192	0.638719
					115723113	26.6902	33.5176	5.9322							115711101	1.20253	2.10547	4.52193		115723018	47.8302	18.9334	41.7054		115707629	24.2936	7.20032	8.08099
					115723128	2.22767	17.0202	0.65762							115711104	0.310349	0.621106	2.43179		115723020	20.0873	3.25231	10.5471		115707637	6.27046	0.540065	1.9484
					115723165	73.3672	117.744	20.9032							115711110	0.404343	0.44944	2.595		115723026	12.3454	1.6149	7.16282		115707641	6.56591	0.578214	2.18975
					115723219	0.778265	102.985	6.34899							115711109	4.08148	3.23204	11.0356		115723029	167.72	8.22782	150.905		115707660	17.6622	3.15591	4.39865
					115723236	54.3616	66.2536	4.29208							115711127	37.0854	22.5285	80.7412		115723053	18.7256	0.120288	9.2463		115707664	3.6016	0.772634	0.69019
					115723244	8.25617	50.8904	11.6406							115711137	0.137826	0.0656173	3.58045		115723085	18.3685	8.09838	16.7592		115707668	9.23104	1.55674	3.0754
					115723263	16.4848	19.8237	6.28922							115711150	0.152742	0.001	1.79529		115723121	14.7567	1.32158	12.749		115707673	1.09877	0.110834	0.20578
					115723304	9.33635	41.8232	4.13319							115711162	4.03169	2.76663	25.5888		115723144	31.9704	1.10043	16.721		115707694	9.16156	1.86918	3.86698
					115723330	28.1288	68.3441	14.9255							115711194	2.5956	0.637403	25.2011		115723163	2.37328	0.77277	2.73717		115707710	2.99842	0.001	0.001
					115723332	3.18754	14.7334	2.08152							115711233	2.47135	0.236873	5.50403		115723189	7.3488	3.45183	7.7366		115707713	79.6589	10.2218	14.8572
					115723359	12.955	49.4916	11.6645							115711229	36.3499	225.763	513.418		115723225	11.9273	3.73011	10.9037		115707719	8.00525	3.31785	3.25131
					115723362	11.214	66.8745	22.3704							115711243	1.246	2.87221	141.606		115723237	924.048	49.821	427.108		115707723	13.271	0.001	0.899932
					115723389	9.48809	20.399	6.11378							115711246	10.3849	5.07212	15.3689		115723265	61.1771	14.3002	31.9045		115707732	8.06588	0.321844	1.76097
					115723405	20.5883	38.1298	4.18952							115711262	0.217749	0.0370537	1.23764		115723279	3.92864	0.836908	4.37923		115707744	510.833	68.2209	134.243
					115723407	58.8755	213.58	61.8117							115711294	11.7149	1.00321	15.8082		115723287	22.6095	7.90097	16.0437		115707746	33.473	0.526817	0.731239
					115723417	118.41	161.538	36.0912							115711295	6.96577	3.08671	9.25901		115723293	54.351	17.0138	50.5905		115707758	4.61297	1.33719	0.926504
					115723422	30.4358	123.945	3.21809							115711298	0.644041	0.462171	4.72347		115723305	8.11487	1.44757	4.10013		115707780	4.4139	0.402352	0.54248
					115723428	60.8232	97.1716	1.5888							115711317	4.12402	1.15479	8.14347		115723338	7.83084	3.32968	8.34787		115707788	6.89462	2.55223	3.02663
					115723429	1.9733	6.7968	1.48975							115711333	0.600152	0.001	2.14678		115723341	6.64823	1.64085	4.88816		115707805	3.4088	0.463183	1.03636
					115723433	18.3707	38.1415	8.33758							115711352	6.89289	3.24711	8.83632		115723343	13.3214	3.8027	10.466		115707808	395.96	123.412	156.981
					115723470	0.451256	4.05626	0.0729833							115711390	2.50922	3.74312	8.09692		115723358	17.5182	1.79039	14.7011		115707810	13.7657	0.240795	2.64854
					115723625	2.91452	3.63581	0.766152							115711364	723.715	400.829	1596.68		115723368	44.5776	10.7036	26.2455		115707811	9.36147	3.94705	0.001
					115723628	0.355674	1.08173	0.445741							115711413	6.28167	2.32656	15.3972		115723383	10.0418	2.58567	7.23961		115707812	29.1356	5.47749	8.28817
					115723684	5.14805	107.276	24.8336							115711421	134.544	47.3553	190.084		115723394	13.9205	6.6905	14.6812		115707816	13.8861	3.40766	0.93508
					115723856	33.5599	236.451	34.8704							115711424	19.4159	9.20151	43.8031		115723401	21.806	4.40532	12.7132		115707820	0.984814	0.055624	0.090972
					115724090	2.78528	3.60378	0.709155							115711444	0.338375	0.112707	2.72756		115723408	10.1012	2.48827	10.036		115707823	1.18505	0.448445	0.508482
					115724137	19.0926	32.2216	4.69405							115711454	1.12049	0.586259	11.5993		115723418	3.84445	0.308796	2.61324		115707826	30.2483	8.34792	14.8896
					115724169	496.279	1257.21	110.813							115711457	2.71956	0.78218	3.49921		115723458	39.167	19.3826	43.4429		115707829	23.1412	7.09199	11.2041
					115724183	80.1393	332.097	46.6022							115711473	1.34541	0.072061	5.18992		115723485	1.05654	0.29661	1.21742		115707844	20.2372	7.00491	0.661755
					115724426	0.670705	3.52383	0.968696							115711491	1.39678	35.1562	102.177		115723558	2.22037	0.001	2.66945		115707857	14.3997	4.76675	2.70593
					115724470	22.236	64.231	8.39634							115711537	21.0279	14.0973	51.7999		115723623	5.92137	0.979521	4.48448		115707858	17.182	2.36225	6.44967
					115724474	86.9734	160.714	26.3054							115711545	1.19864	1.53049	4.42382		115724085	122.345	21.0156	71.7369		115707874	3.43619	0.662644	1.0336
					115724518	0.940336	87.9688	2.57402							115711548	2.96597	24.0933	43.7677		115724061	57.7502	15.0901	61.1178		115707883	19.2964	9.33268	8.24471
					115724539	0.353085	29.2395	2.10979							115711554	0.639793	2.75608	16.3874		115724123	1.94744	0.115904	0.825314		115707884	5.17377	0.001	0.659755
					115724567	51.7004	75.049	1.34017							115711571	4.67246	1.64144	12.2494		115724127	16.1873	1.03248	15.0457		115707897	1.20353	0.073781	0.148284
					115724577	3.42282	6.61445	1.44534							115711580	1.12814	0.0837507	4.98551		115724129	9.19745	3.1034	6.22604		115707905	2.53145	0.186304	0.68084
					115724588	9.89656	19.0283	1.83452							115711591	4.63872	0.855095	9.56511		115724139	1.71572	0.397384	2.01856		115707918	217.413	56.3791	84.3994
					115724610	2.18744	12.1028	0.649498							115711617	4.64106	6.18286	83.1732		115724140	44.3598	1.38352	32.8989		115707928	27.6823	6.44072	10.9331
					115724625	139.069	766.06	142.074							115711623	1.64424	1.67842	3.51332		115724167	2.95119	1.24323	2.82574		115707937	238.807	122.777	1.78126
					115724641	16.0154	27.2712	5.21245							115711627	7.20422	9.40631	22.3005		115724192	13.6478	3.94987	9.2886		115707950	53.418	2.21618	9.39346
					115724662	9.63676	45.3955	2.33096							115711641	1.80275	1.62703	7.50418		115724203	5.77825	1.93707	4.59689		115707958	16.3084	0.219256	0.358373
					115724689	9.96302	17.4442	1.80417							115711637	36.1193	10.8275	44.1377		115724464	38.8703	0.0768377	41.4002		115707959	18.671	1.13208	1.36804
					115724694	1.02356	3.02239	0.147603							115711659	1.56838	0.292215	2.64668		115724509	7.13292	1.12327	4.18791		115707961	7.79988	0.001	0.001
					115724721	12.6896	38.6517	1.9645							115711669	0.678437	1.77011	8.99918		115724530	1.89973	0.088833	2.31405		115707962	56.3495	15.4512	7.26202
					115724840	199.913	453.132	61.2943							115711675	0.0279593	0.864011	7.29736		115724627	597.406	145.83	632.564		115707963	10.6548	0.738954	0.0731323
					115724871	1.93336	11.3718	0.597869							115711722	37.8511	18.9234	96.6799		115724658	5.67483	0.211118	4.87549		115707982	41.631	2.84419	5.90973
					115724915	0.344449	1.26861	0.0468827							115711738	9.3559	11.9198	25.9602		115724724	1.14626	0.111512	1.38217		115707999	13.6842	1.01235	2.11531
					115724919	24.8534	28.4434	12.337							115711940	9.56372	1.87801	11.9839		115724770	1.38488	0.024763	1.38236		115708001	10.3313	2.11127	0.439255
					115724944	31.091	36.4181	11.4187							115711946	0.001	0.122701	27.3977		115724804	2.44079	0.6142	2.89491		115708004	13.1347	1.18023	2.77217
					115724972	985.307	4612.22	383.939							115711942	0.323075	0.044224	1.10013		115724838	3.10024	1.50627	3.45585		115708017	9.87813	0.063618	0.390322
					115725060	217.422	543.807	11.9045							115711957	7.91187	0.001	24.88		115724854	7.64255	0.926647	3.3759		115708019	50.6732	20.9192	12.0822
					115725061	287.282	625.452	46.2428							115711961	0.290829	0.837691	8.51856		115724883	12.1308	3.3154	9.92133		115708021	66.4188	0.001	17.4838
					115725088	22.3217	96.8548	14.8091							115711973	1.17176	0.206771	3.10019		115724907	2.38548	0.496611	2.44215		115708030	26.187	6.58757	9.17902
					115725089	14.2477	36.8394	16.7546							115711977	16.8049	4.20614	78.5913		115724927	3.03003	0.400206	2.00566		115708052	722.775	200.01	309.303
					115725109	20.1286	153.217	3.34471							115711993	275.093	50.6603	347.886		115724959	13.4851	1.72585	5.92429		115708056	25.3215	6.16853	4.50624
					115725117	31.4087	42.4528	13.277							115712005	9.71403	1.91336	15.899		115724992	3.12067	0.001	1.72572		115708065	28.4047	2.63891	8.93461
					115725156	16.7445	53.6243	8.53599							115712008	18.326	7.46096	37.638		115725005	2.98012	1.17728	2.62779		115708081	10.1834	0.001	1.01444
					115725165	3.09013	7.52376	0.307953							115712018	0.134458	0.372495	1.7307		115725009	75.3093	24.083	58.6496		115708082	7.1504	0.173048	0.152827
					115725166	4.97501	6.91326	0.174129							115712026	0.142524	0.038339	0.795005		115725019	43.235	1.97336	18.9985		115708100	8.67226	0.303529	2.7353
					115725170	3.27544	60.7689	10.3538							115712025	4.55377	3.59277	13.6603		115725037	36.3806	12.1635	27.0705		115708103	4.89462	0.037533	0.688959
					115725225	15.4726	56.6157	7.551							115712033	13.9027	4.0755	29.7698		115725045	7.2251	0.6091	8.18028		115708117	2.38416	0.001	0.0528433
					115725263	628.08	1510.07	100.792							115712052	0.0243237	0.116001	8.68448		115725077	63.4759	20.4227	48.38		115708124	42.2814	0.031824	0.001
					115725275	3.84898	9.00534	0.385406							115712056	28.4788	7.80853	49.0836		115725122	6.67257	2.46363	5.30282		115708131	753.165	0.930458	2.81248
					115725293	13.5443	104.688	12.6912							115712070	1.70698	0.190893	2.76402		115725285	160.655	62.4206	132.255		115708148	6.84977	0.20783	0.425129
					115725294	24.3006	27.2558	11.635							115712071	0.663573	0.001	1.91668		115725300	20.9511	1.89207	14.9212		115708153	41.1201	0.24955	1.97233
					115725295	905.215	2015.29	198.1							115712081	0.098836	0.001	9.46181		115725318	17.5976	6.92393	15.0264		115708155	5.41063	0.106061	0.676195
					115725305	13.6692	47.9029	6.51592							115712115	0.121556	0.060399	4.61821		115725349	10.6463	4.35923	12.0507		115708168	1.2193	0.138229	0.460086
					115725311	152.416	244.223	39.8621							115712117	0.187442	0.14416	13.1822		115725354	7.95757	2.20314	9.08508		115708170	1.62695	0.135514	0.475079
					115725316	5.57727	9.44798	2.32726							115712118	1.17169	0.001	2.9023		115725385	25.1437	7.81039	21.0409		115708181	21.7062	0.280247	0.001
					115725330	939.888	2222.97	112.573							115712124	1.04665	0.287998	5.75555		115725401	15.1246	6.10098	13.4155		115708201	3.71649	0.815211	1.70843
					115725389	10.8941	35.6829	16.337							115712151	1.48636	1.86745	7.28376		115725421	6.36012	1.19191	6.28754		115708203	12.4448	3.90998	3.45481
					115725406	4.85904	10.8093	4.38414							115712162	0.27252	0.489507	3.50533		115725464	5.79074	0.651741	4.08071		115708207	23.5366	1.41663	5.08624
					115725411	74.0791	222.73	27.8317							115712166	0.085483	0.957882	1.81974		115725469	9.8421	3.08947	7.78097		115708208	17.4356	5.25714	6.44394
					115725449	25.3567	67.1238	21.774							115712183	0.542824	0.26654	6.20401		115725482	14.8601	6.07098	12.7841		115708213	116.242	34.2169	55.923
					115725528	14.5872	40.9625	18.9402							115712188	0.069168	0.112351	2.67111		115725526	7.13823	0.469387	7.9879		115708215	5.94829	1.38582	1.91487
					115725546	62.5254	67.3953	26.6588							115712193	0.103607	3.58589	45.2656		115725596	14.7046	5.52706	11.4222		115708226	5.02505	0.049364	1.53251
					115725551	3.06517	4.56868	1.10672							115712197	7.18835	2.40463	79.99		115725639	7.5059	1.67224	4.51261		115708230	5.0958	0.87022	2.18428
					115725567	44.4625	70.1905	21.7242							115712198	4.2445	5.34111	19.3985		115725669	17.4013	4.58253	14.178		115708236	3.30031	1.13173	1.30562
					115725600	40.736	51.51	19.4799							115712206	1.57342	1.28646	16.1388		115725691	16.4603	3.5675	8.56624		115708237	1.44941	0.369028	0.584189
					115725606	3.65244	12.279	4.28384							115712240	0.609447	0.001	2.89156		115725699	36.1736	14.905	39.9632		115708240	142.253	15.4492	28.0335
					115725624	6.3788	13.6818	3.60747							115712253	1.87897	0.001	2.51695		115725724	1.04364	0.001	1.03957		115708243	259.399	25.9511	0.498475
					115725651	1.31373	3.35392	0.459776							115712267	0.435146	0.433954	5.60253		115725732	11.6196	2.72077	9.5347		115708244	2.25341	0.0464577	0.27048
					115725652	41.981	180.758	62.1377							115712272	0.225317	0.0892107	2.42553		115725765	26.7674	10.9492	21.9751		115708248	1.22735	0.001	0.042724
					115725657	7.70414	34.2326	7.75239							115712277	4.79511	2.13779	7.786		115698141	2.5917	0.210613	1.22729		115708249	2.30906	0.001	0.001
					115725667	3.2234	6.93938	3.31052							115712283	8.4827	5.47306	40.6691		115707389	4.69563	0.166653	2.16491		115708255	13.4674	0.09033	0.012546
					115725682	22.4497	73.9413	22.0143							115712335	1.27107	0.001	7.08575		115716786	1.2239	0.001	0.541086		115708261	12.7461	0.961224	3.99868
					115725694	105.054	697.019	41.7289							115712365	6.20318	1.44742	29.7199		115703612	3.4819	0.134141	1.79409		115708262	11.1782	2.40921	0.148846
					115725701	23.3069	96.6715	5.69666							115712368	6.14745	0.001	11.9194		115721321	4.67529	0.465643	2.55862		115708277	13.7909	0.8755	2.98555
					115725738	0.099682	1.23227	0.090812							115712419	1.52342	1.28122	3.57233		115706672	3.79949	0.825982	2.90405		115708279	1.93694	0.001	0.473345
					115725739	3.72977	56.1126	2.01319							115712443	0.832253	1.55551	7.39612		115715890	1.68432	0.17494	1.19049		115708280	22.8604	1.23058	3.45276
					115725742	4.10007	122.16	1.6084							115712461	0.427688	0.364302	3.50056		115705605	9.37596	3.95285	7.90745		115708292	1.09875	0.001	0.0472323
					115725787	5.22516	6.33988	1.93965							115712504	0.23104	0.001	0.770952		115698239	14.1545	6.06091	14.6742		115708305	6.51666	0.625206	0.598939
					115717034	0.0223397	33.5799	0.408843							115712512	650.677	314.305	1030.25		115704705	6.00912	2.256	6.1839		115708307	97.2248	12.9975	0.426228
					115718837	1.32355	27.8331	0.945879							115712528	0.351057	0.001	6.26798		115700871	3.61776	0.001	4.07636		115708313	18.7518	0.49872	0.060961
					115704823	6.22097	19.8401	6.19032							115712569	8.51794	15.2443	33.4441		115716921	7.05883	1.10774	6.22842		115708315	17.448	1.87357	3.6705
					115704662	0.182628	2.87275	0.0453613							115712572	0.103632	0.04129	1.27805		115701541	7.10147	2.40247	6.50989		115708332	21.4264	1.04746	3.17911
					115695799	1.06629	3.98389	1.47628							115712577	12.7622	2.16137	20.199		115715796	12.1516	5.27851	11.7171		115708341	3.96355	0.001	0.001
					115705129	4.51952	24.6924	6.33704							115712585	10.45	8.70736	36.549		115706669	1.5903	0.244772	1.52749		115708343	8.12711	0.001	0.905033
					115716464	1.52566	14.7956	2.79575							115712608	0.660824	0.12338	2.7472		115716173	3.6944	0.629558	3.54192		115708348	31.3832	5.60515	11.1294
					115718703	1.7969	8.8274	3.44803							115712620	17.0409	73.3542	152.297		115718859	5.32216	1.45368	4.30601		115708353	76.6086	21.5216	36.1568
					115703931	1.66842	19.0579	6.16205							115712621	12.4478	7.65786	99.1674		115705208	9.0342	3.80439	8.14616		115708355	2.43645	1.00669	0.001
					115716221	5.90446	39.7092	14.4481							115712640	0.215058	0.07675	4.68608		115712670	3.79829	0.927661	3.23114		115708666	2.41228	0.0426843	0.0884053
					115706285	4.98669	18.1302	8.53178							115712644	0.562591	0.766593	3.16221		115717763	4.57467	0.89913	2.20687		115708694	4.81537	0.943746	0.165222
					115698873	10.657	36.0892	15.5545							115712646	22.0199	25.8448	54.6801		115720969	1.38337	0.346846	0.758418		115708697	93.9927	5.25431	0.229881
					115715664	0.0657173	1.48675	0.350271							115712658	31.6595	36.0456	88.4894		115710841	3.25539	0.332921	1.60309		115708699	10.5784	0.001	0.21307
					115717102	0.257129	1.0956	0.429139							115712668	28.748	10.2834	48.5388		115701296	1.187	0.199482	0.653298		115708702	21.215	1.17486	8.01169
					115720646	1.35196	6.04438	2.24714							115712688	4.89786	9.84818	15.2562		115715722	11.2871	3.02437	6.92166		115708712	12.9174	0.252029	0.001
					115702701	0.304605	2.8078	0.001							115712690	6.00701	4.17352	16.5796		115702409	9.28087	1.59381	5.32491		115708719	10.8114	3.60222	1.43999
					115694803	0.415804	5.99634	0.0720883							115712696	8.20182	1.54089	19.3993		115725422	1.91381	0.001	0.971664		115708723	1.96999	0.029155	0.212173
					115718604	0.324869	1.9746	0.215717							115712694	3.50482	0.590804	6.60335		115695448	2.63277	0.838511	1.86156		115708734	14.1047	3.06094	0.11516
					115715937	3.27251	15.2619	2.35321							115712703	1.62363	0.752766	3.47801		115711134	5.47094	1.14298	3.43546		115708736	46.347	16.5486	21.1866
					115708615	1.31453	2.89677	1.10364							115712724	3.76124	2.58728	12.1142		115706801	10.0868	1.6551	6.09981		115708751	62.2652	40.0283	17.9241
					115715932	10.6487	21.926	9.20459							115712727	9.667	3.44564	16.2891		115716258	16.4149	6.23107	12.9318		115708769	2.09444	0.444745	0.951122
					115713730	4.48616	15.5733	2.2066							115712743	22.7919	31.3317	156.037		115717597	14.5832	3.32849	10.2059		115708772	1.37977	0.0774693	0.18602
					115700859	2.87327	7.08329	1.14567							115712761	16.9066	15.587	47.5568		115722467	17.0258	4.93007	12.2508		115708775	50.3454	0.991924	0.013009
					115703153	1.96383	8.97225	0.218687							115712763	1.17991	0.305395	3.75075		115711372	1.20458	0.259348	0.921415		115708749	16.3254	7.57323	4.96098
					115705083	0.36652	1.82463	0.0432203							115712764	2.54364	1.06703	49.5518		115702954	20.9531	8.27102	16.9408		115708786	14.2162	0.001	0.256582
					115704363	6.46807	15.0499	4.0478							115712775	8.41174	0.69441	70.214		115704184	7.47145	2.95673	5.97517		115708787	2.44988	0.0442903	0.001
					115708984	0.412504	1.20571	0.0100573							115712786	56.591	17.0441	170.611		115722439	1.49245	0.346075	1.11496		115708804	17.5096	0.0393283	0.658457
					115723440	10.2005	23.1551	3.42944							115712787	10.2154	3.0454	28.5558		115707862	3.61171	1.43473	2.89525		115708815	78.7554	28.1908	33.5084
					115703636	1.84398	4.41039	0.38514							115712788	5.73785	1.92298	14.8902		115700358	4.96445	1.28368	3.92484		115708833	1.27559	0.001	0.36024
					115706596	1.52175	1.82756	0.089359							115712797	10.9403	2.86765	22.203		115694785	1.81574	0.755212	1.5144		115708847	1.16098	0.001	0.234829
					115725420	2.77031	7.364	2.81915							115712798	8.03117	4.04007	20.2889		115714775	7.45384	2.7155	7.65251		115708850	17.5926	1.43237	5.27177
					115699215	0.735455	3.41156	0.727945							115712799	33.3451	7.86425	43.4794		115708993	0.713509	0.0879157	0.73146		115708858	9.74339	0.70175	2.20584
					115704237	0.396242	20.4949	0.359976							115712804	10.9978	8.76833	22.781		115699188	2.26763	0.995092	2.39418		115708859	39.8887	12.0251	7.66851
					115724507	1.91619	4.50982	1.91356							115712813	9.76469	10.4187	52.3721		115710791	12.277	3.9712	13.325		115708862	3.37381	0.044343	1.05054
					115710567	138.644	1133.49	133.715							115712837	23.103	24.8997	62.8853		115704287	2.48028	0.437982	2.74253		115708871	1.44991	0.0964527	0.515508
					115705055	29.3133	157.936	25.0479							115712839	198.898	79.1138	249.877		115703058	7.2737	2.96248	7.85505		115708875	4.53396	0.058375	0.173178
					115724727	0.0883037	1.6392	0.0150327							115712851	13.7656	5.34207	30.1002		115716388	4.96466	1.82328	5.57437		115708878	3.66498	0.517148	0.709092
					115720566	2.52769	13.8681	4.10349							115712852	1.34111	0.513249	9.24055		115695711	1.93158	0.881936	2.1657		115708883	7.78114	3.74203	0.886268
					115723976	7.46343	40.7643	12.5511							115712861	1.60097	25.6404	110.443		115720175	27.8423	11.8475	25.8146		115708898	3.74682	0.0818517	0.352993
					115714886	5.55766	13.291	6.5216							115712877	3.9473	4.49506	9.0708		115725640	3.76717	0.0395703	3.1843		115708921	170.608	0.001	0.13955
					115704834	1.01681	9.18092	1.79218							115712910	5.14102	6.07069	14.0173		115700411	19.6296	1.65848	17.7981		115708923	8.60633	3.54543	2.40818
					115706753	10.2343	26.9048	11.1076							115712930	16.745	21.35	43.3661		115715211	1.11019	0.001	0.992123		115708933	0.857356	0.001	0.0845327
					115706752	9.64573	28.9639	10.8705							115712939	2.77775	4.87628	28.6007		115720849	27.4438	11.6365	25.9317		115708941	5.18041	0.001	0.791051
					115703565	1.34323	9.34527	3.26158							115712971	39.8222	16.851	82.4588		115706768	3.92678	1.54842	3.65099		115708958	4.01319	0.323321	1.01018
					115717146	5.95371	27.5929	11.0376							115712977	2.9623	2.08987	7.23039		115695825	1.29492	0.49819	1.29013		115708976	14.8231	2.53656	5.84012
					115696801	1.32211	7.58522	2.72804							115712979	24.611	11.5006	32.3077		115714980	2.0987	0.737736	2.07325		115708982	1.00702	0.335616	0.189774
					115697621	0.691629	2.88835	1.36804							115712993	17.3119	2.24985	51.157		115722801	2.58161	1.04826	2.51772		115708988	1.39181	0.0765303	0.276225
					115704068	1.07255	6.07048	2.50283							115713008	13.872	6.90713	22.3858		115720114	4.62091	2.03011	4.49787		115708989	14.0678	0.030295	0.0761523
					115715676	1.58752	15.7343	4.13318							115713012	6.97288	1.20791	50.9179		115713267	8.01743	0.7236	7.36629		115708990	3.67061	0.152318	1.20273
					115713390	19.9703	54.864	25.9969							115713020	62.4282	27.2946	190.658		115703572	4.18248	1.28268	3.98695		115708992	2.2272	0.937821	1.07287
					115717089	10.6222	33.4784	14.336							115713003	4.89189	4.17419	10.8812		115703118	36.0521	3.4772	28.4218		115708997	1.03907	0.367757	0.145427
					115713180	0.771058	4.37285	0.484234							115713064	95.152	69.9245	273.562		115725362	13.4241	5.77372	11.6031		115709006	1.97115	0.706177	0.27387
					115695443	0.238974	0.971683	0.172534							115713069	9.44274	21.1964	48.6303		115703684	6.49171	0.469379	5.4005		115709017	3.46289	0.001	0.263019
					115709411	34.9619	75.695	28.0631							115713181	4.5461	8.17024	21.8818		115721760	5.62638	0.553102	4.76314		115709018	14.3561	0.001	0.001
					115710781	119.7	549.558	48.0699							115713214	1.35082	8.44366	32.6846		115715806	4.14439	0.0877667	3.30329		115709042	9.33	2.01744	3.80511
					115707399	12.6401	52.1068	7.47572							115713399	2.4171	0.001	20.261		115715814	3.86818	0.0991993	3.10711		115709066	0.955965	0.037923	0.231621
					115712623	1.43115	5.34169	0.0936967							115713438	6.68706	3.10952	8.58348		115708973	8.07194	3.91524	8.16558		115709095	100.864	4.83299	6.80757
					115716083	7.50382	20.3053	4.48435							115713472	0.209586	0.001	0.958142							115709102	3.36058	0.199205	0.001
					115699990	6.33139	13.6843	4.59283							115713475	8.73711	4.00227	64.4137							115709113	48.6819	18.6576	14.7208
					115703911	2.8216	6.09702	0.655355							115713490	0.165944	0.228451	1.60091							115709120	0.944042	0.001	0.168493
					115716978	9.47118	12.2243	4.7241							115713493	4.74156	2.59165	10.9668							115709170	5.67691	0.163438	0.0529377
					115709848	6.37998	9.11579	1.22202							115713575	14.935	8.55905	37.4591							115709201	30.2725	1.91684	7.10804
					115712096	12.57	21.8789	0.494195							115713651	14.3651	17.5805	68.5022							115709204	186.445	8.88482	12.1594
					115708511	8.8259	23.6692	11.0221							115713728	1.02143	2.44397	25.0112							115709205	132.995	9.02389	12.5235
					115708510	9.15923	35.1574	11.5038							115713740	7.91749	3.71654	10.1373							115709206	215.288	13.309	23.0193
					115711840	93.872	177.235	40.3476							115713766	0.481904	0.94711	2.41845							115709207	155.36	1.94498	3.38045
					115711839	41.81	102.852	7.78157							115713783	410.2	767.132	1612.42							115709213	373.799	115.551	150.077
					115711845	59.5763	145.905	13.7357							115713840	43.4465	61.5506	292.272							115709214	136.313	44.6239	50.871
					115711843	437.153	1063.57	111.233							115713917	7.23501	2.38931	13.016							115709215	118.854	32.5268	44.4638
					115711842	271.67	354.458	44.4332							115713937	0.725221	0.641638	1.68017							115709235	5.42376	0.0833497	0.810939
					115715485	0.57757	0.91716	0.0839643							115713943	7.34174	2.87802	14.0426							115709258	1.33837	0.353288	0.191954
					115696206	53.306	844.192	42.0735							115713958	3.61208	1.04273	26.0427							115709271	4.08432	0.001	0.001
					115711893	35.8386	353.899	50.063							115713992	12.8476	13.3179	30.4981							115709296	507.45	0.166513	2.98397
					115703531	2.73194	23.4947	1.37843							115714007	0.898327	0.001	3.17206							115709304	230.632	121.735	28.9816
					115724416	14.4069	133.575	5.62797							115714011	99.3195	27.7215	235.478							115709311	18.5792	0.32302	3.99287
					115711908	0.954541	8.62488	0.305131							115714025	8.77971	3.06026	53.7008							115709313	53.0769	4.08023	7.06823
					115711907	12.4684	71.0045	7.25337							115714029	7.08522	5.97788	16.9253							115709397	17.694	1.21763	5.79153
					115701795	1.64312	8.99876	0.39059							115714037	312.843	142.653	577.792							115709405	20.805	6.31999	4.72585
					115703511	1.22471	9.91866	0.0792593							115714043	82.1112	45.3788	164.776							115709409	5.4561	0.0333147	0.400417
					115711912	11.1357	61.0278	4.36655							115714067	29.1175	17.2796	67.515							115709412	87.3047	30.646	34.9485
															115714126	11.1296	18.7214	91.3386							115709418	3.73813	0.246787	0.827016
															115714130	0.100889	0.182174	2.62775							115709424	25.1708	0.0384807	0.988718
															115714133	3.59155	0.001	31.6852							115709431	145.623	40.109	72.4881
															115714137	1.74164	1.19988	15.1639							115709439	181.678	43.0335	66.0489
															115714144	7.87983	10.586	23.2384							115709440	795.949	0.001	0.876697
															115714152	76.1959	36.4371	124.385							115709441	2.59143	0.484259	0.311321
															115714158	7.75433	3.25114	10.3394							115709442	48.0821	0.001	0.0824573
															115714168	11.6136	4.31472	16.2032							115709461	3.3694	0.001	0.428024
															115714172	7.42403	2.63462	9.0055							115709468	8.18843	0.675217	2.24932
															115714184	1.65923	1.75805	3.57176							115709471	1.84047	0.632423	0.225014
															115714204	10.1056	11.6133	36.6318							115709473	2.2111	0.001	0.0480987
															115714206	12.2412	6.52225	26.9825							115709512	104.491	7.74686	0.995519
															115714217	15.9999	1.0545	73.2078							115709529	203.489	52.431	89.9752
															115714232	1.91713	1.58623	4.65784							115709566	90.667	34.5881	4.92549
															115714235	2.23914	16.8478	67.55							115709568	1.93233	0.001	0.219501
															115714240	3.76982	5.74003	13.0496							115709592	4.82074	0.0594687	0.249146
															115714244	7.85968	2.74417	136.151							115709593	27.2343	9.1983	11.8018
															115714259	5.00564	4.75368	13.139							115709596	2.5385	0.894797	0.314461
															115714286	12.8193	4.74704	17.3603							115709616	79.3373	3.91199	0.385135
															115714293	0.757987	0.149281	3.63079							115709619	316.04	122.237	39.0604
															115714314	1.51754	0.246982	3.46941							115709624	99.7795	4.71942	0.577458
															115714360	1.00449	0.162007	1.33015							115709657	116.028	33.143	57.0482
															115714376	0.242933	0.350469	18.8166							115709667	178.263	4.35344	20.6412
															115714380	2.89022	2.22887	6.05651							115709668	122.768	9.1523	5.28256
															115714395	9.77261	7.71831	19.9829							115709687	22.1961	3.65891	8.6281
															115714400	0.001	0.001	1.20859							115709693	4.56075	1.73891	1.62608
															115714404	10.2066	7.27727	84.3635							115709706	19.1366	7.56553	6.50061
															115714408	2.65325	2.92467	10.1507							115709720	5.44693	0.131931	1.79408
															115714441	50.2613	23.9856	94.9116							115709743	41.3904	0.789731	12.6296
															115714447	2.84514	1.55328	7.25009							115709744	133.091	50.5831	60.5076
															115714468	24.5646	6.65224	41.1328							115709751	75.0012	0.0532527	0.051038
															115714469	0.69587	0.356913	4.64873							115709763	38.6535	12.2525	17.6465
															115714498	3.09391	0.0738643	5.01774							115709775	2.18647	0.001	0.001
															115714513	0.779374	0.245528	4.19767							115709783	10.5379	0.972525	3.76095
															115714514	15.0221	13.2074	43.3447							115709786	16.4656	7.59686	1.62423
															115714543	0.85812	0.25263	10.0647							115709797	122.116	67.8074	27.3556
															115714545	24.7176	8.72632	36.2374							115709806	12.5445	2.98154	5.09241
															115714548	0.404514	2.02336	4.61654							115709826	96.4899	46.0008	46.7507
															115714556	0.0154917	0.001	39.6621							115709828	117.279	49.8586	39.6682
															115714563	3.3051	4.37695	12.8722							115709841	13.8454	0.0416403	0.222567
															115714582	3.62842	1.59781	28.6957							115709862	687.237	3.00558	28.0676
															115714588	11.8733	5.75714	35.3204							115709888	3.04731	0.11044	0.125063
															115714620	0.001	0.001	2.40576							115709892	2.01874	0.453396	0.982586
															115714651	0.995354	1.96278	9.73419							115709902	50.0723	5.0599	4.8456
															115714665	38.277	19.8356	99.531							115709903	11.6323	0.210864	1.98303
															115714681	0.521367	0.163024	5.87536							115709907	10.6291	3.45404	4.42239
															115714683	4.59913	0.653499	23.0093							115709912	19.4093	6.68688	9.54211
															115714703	6.94084	17.4568	29.6374							115709933	166.619	0.240632	1.02441
															115714706	2.73876	1.68016	9.70073							115709956	27.5312	4.13111	4.66937
															115714708	4.44595	0.169299	67.7001							115709957	11.9574	4.95663	5.40768
															115714735	1.79346	4.12113	16.9176							115709961	27.4026	4.04725	4.86153
															115714737	9.19059	4.03367	19.9502							115709974	9.16827	0.001	0.355395
															115714742	6.15741	9.37155	26.441							115709999	5.06721	0.428322	1.08901
															115714772	7.33869	1.30088	9.39938							115710021	8.67074	1.21702	3.67667
															115714773	13.0353	5.04106	16.2144							115710028	24.8666	0.29804	0.001
															115714782	2.42744	6.42236	10.1747							115710036	263.2	60.0638	110.407
															115714792	3.03275	9.52915	50.7562							115710038	33.7679	5.86659	9.78007
															115714870	6.44604	3.58858	13.3766							115710060	5.98305	1.53352	3.09204
															115714874	4.1528	0.313393	60.2895							115710062	4.12727	0.001	0.265653
															115714883	10.1991	13.417	26.8398							115710061	1.53697	0.001	0.1922
															115714891	2.03196	0.432032	6.67							115710070	27.3625	0.484002	9.11826
															115714900	0.935102	0.89319	4.99812							115710078	17.1985	4.9598	6.43574
															115714911	0.723385	0.59432	4.23885							115710084	5.94113	0.970533	0.844597
															115714912	2.40029	26.3291	63.9927							115710085	5.76835	1.09878	1.05542
															115714941	2.52489	0.548466	7.97855							115710100	3.51791	0.780918	0.001
															115714957	4.86142	1.01445	9.61412							115710104	28.3972	2.57938	0.260186
															115714958	2.00749	3.79121	35.1396							115710077	82.2974	12.8185	13.9079
															115714966	11.0117	9.95848	23.1495							115710112	33.8422	12.635	14.492
															115714975	4.90416	8.4924	18.4742							115710121	68.2751	0.001	0.001
															115714978	5.74359	8.81832	18.66							115710122	51.9569	0.610806	1.02017
															115714982	56.759	40.7961	165.862							115710127	40.1333	0.252721	0.94965
															115714988	6.20191	1.7919	16.4429							115710128	45.3113	0.383567	1.16592
															115714992	1.25318	0.031716	5.04013							115710129	33.3189	0.099883	0.664895
															115715000	0.018826	0.0680023	6.05465							115710150	751.264	1.02055	11.0858
															115715012	10.3509	3.80279	12.4623							115710152	19.4502	1.43266	2.69344
															115715013	6.52186	21.506	62.0351							115710162	15.975	5.01202	7.03506
															115715031	16.8159	6.49945	58.832							115710163	126.293	48.7146	60.01
															115715032	32.1093	31.1841	84.9062							115710174	49.393	2.40872	10.301
															115715043	2.33644	0.807205	3.29803							115710195	22.0351	0.099263	2.95645
															115715063	5.97785	6.89343	14.4609							115710201	5.04161	1.30142	0.050903
															115715083	8.86619	7.41195	21.7673							115710205	24.4566	0.001	0.0808713
															115715093	10.2398	4.57515	26.6921							115710210	14.3559	0.001	0.001
															115715094	0.801153	0.087898	2.82292							115710217	82.1491	28.3579	40.1296
															115715098	3.88461	4.42446	10.2859							115710221	4.66961	0.719076	1.50784
															115715105	5.45286	7.76515	17.8369							115710224	10.5926	0.001	0.0572993
															115715113	1.0138	1.92383	12.1391							115710226	473.368	0.069776	55.2771
															115715116	2.96734	1.7726	6.60654							115710231	14.4449	2.22559	5.9884
															115715117	2.30684	1.3064	5.77553							115710251	20.0055	0.17851	0.959101
															115715125	6.62045	6.83442	24.5342							115710255	9.64856	0.001	0.685789
															115715131	0.366921	0.918103	1.50307							115710266	2.64753	0.001	0.113163
															115715143	1.18856	0.001	1.81534							115710269	0.861162	0.001	0.137641
															115715146	1.66596	1.96075	23.3639							115710309	3.96507	0.001	0.001
															115715149	0.0115047	0.001	47.1021							115710311	232.463	68.5872	87.0974
															115715155	25.388	8.11198	45.7355							115710321	2.83386	0.001	0.001
															115715163	3.67415	1.53139	5.62445							115710333	90.1777	9.4019	5.33629
															115715175	0.993153	0.346713	16.7322							115710334	2.01641	0.268435	0.001
															115715193	0.151715	1.83977	14.0003							115710361	34.2522	0.001	0.001
															115715240	0.483865	0.0541153	1.62955							115710452	293.61	79.0101	107.108
															115715251	1.98188	1.89161	6.00839							115710511	3.2021	0.634593	0.131608
															115715253	1.04999	1.05269	3.80436							115710699	1.24539	0.0681377	0.118514
															115715275	0.809995	0.167295	1.80043							115710707	1.21102	0.306099	0.0921357
															115715284	1.90738	0.579387	2.52177							115710712	133.457	59.8368	30.6243
															115715324	3.21813	0.108826	5.13986							115710723	16.5188	4.6899	6.4891
															115715331	1.1623	0.0797213	19.9952							115710728	1.61729	0.560697	0.607654
															115715338	3.52254	0.80483	7.31217							115710734	12.5601	4.88497	4.31825
															115715577	22.8483	8.45325	87.8578							115710928	2.22476	0.151306	0.806798
															115715581	33.2288	26.1162	72.0983							115710955	4.04512	0.0551493	1.21574
															115715589	3.30016	5.4776	17.4565							115711038	4.72695	2.1993	1.13864
															115715601	5.86234	2.60563	14.848							115711061	6.40336	2.00603	3.01087
															115715608	60.3689	7.56202	244.693							115711044	70.911	0.538402	1.78009
															115715620	1.06497	1.70781	14.0899							115711082	35.0392	10.7637	13.4059
															115715621	4.44398	4.50505	10.3439							115711111	3.53781	1.43748	1.64458
															115715622	1.5836	1.17703	3.65337							115711171	10.4529	0.510041	1.55047
															115715626	0.418052	1.02345	5.94557							115711173	0.990039	0.12802	0.162852
															115715629	2.03872	2.04196	7.21867							115711195	1.45971	0.0543453	0.322768
															115715635	10.1763	12.7474	32.3522							115711214	3.50015	0.876843	1.58781
															115715642	0.001	0.001	2.67327							115711222	340.561	109.678	162.06
															115715647	0.826575	2.68858	8.60133							115711240	348.71	93.9394	158.711
															115715648	0.643723	0.001	17.798							115711250	1.79196	0.432475	0.566853
															115715659	1.69072	2.62911	15.8202							115711257	1.56099	0.033199	0.001
															115715660	10.3277	4.51838	20.0798							115711261	53.5979	9.73913	23.0761
															115715663	0.956382	1.76891	13.4929							115711305	1.96981	0.001	0.028268
															115715666	4.09943	5.57415	12.6238							115711324	12.008	0.001	2.73959
															115715673	0.001	0.001	2.02112							115711328	41.6163	10.7274	20.2856
															115715684	44.9979	23.3496	206.037							115711368	245.056	69.5851	100.98
															115715690	2.28841	0.823533	8.23736							115711381	6.59719	0.036433	0.336399
															115715721	6.56316	7.78473	27.9833							115711394	2.06384	0.001	0.001
															115715726	0.933136	0.792028	4.1455							115711399	6.45571	3.42348	1.23082
															115715730	2.20582	0.663794	4.08186							115711400	5.15695	0.001	0.298486
															115715736	57.5275	22.7669	101.914							115711443	17.9378	3.17422	7.82952
															115715739	0.983917	0.214058	1.92958							115711453	1.62653	0.064913	0.329732
															115715753	0.826351	0.001	1.92161							115711461	33.3555	8.46504	12.4236
															115715756	9.62321	3.17583	36.5472							115711462	1.1181	0.001	0.149446
															115715760	0.220585	0.0591213	4.76847							115711482	104.806	26.1632	45.2979
															115715767	29.575	26.7213	64.1953							115711486	532.769	112.653	157.262
															115715778	3.45339	2.20197	7.4875							115711493	9.37614	1.07519	1.89975
															115715792	0.512517	0.001	3.53554							115711509	4.86422	0.0517183	0.154796
															115715808	0.147124	0.001	1.46589							115711516	18.0956	0.213382	0.075279
															115715809	14.0014	10.2489	31.8279							115711523	2.71941	0.558475	0.106311
															115715828	0.086002	0.001	1.07682							115711534	31.8205	1.60645	0.206757
															115715831	259.242	93.2074	470.796							115711535	20.4274	13.4864	6.28761
															115715847	0.108265	0.601002	3.91349							115711569	12.2207	0.001	0.001
															115715848	11.1027	3.65037	13.9311							115711588	51.8598	17.1802	7.76001
															115715855	0.927147	0.105713	1.24743							115711605	1.69032	0.001	0.001
															115715863	3.54094	1.54107	8.54978							115711624	44.2754	12.2113	18.2962
															115715871	0.218915	0.069752	1.82146							115711636	30.5034	11.087	12.5334
															115715881	6.54491	4.41888	21.007							115711646	9.55069	0.28869	0.461394
															115715886	1.13429	0.001	4.75746							115711658	4.37486	0.371914	0.001
															115715893	0.00695167	0.001	17.6494							115711663	22.8938	6.91445	8.85974
															115715918	0.470769	1.36473	24.364							115711665	37.2228	1.85071	3.31883
															115715921	0.991046	0.272562	14.4693							115711679	60.3073	24.6073	9.56623
															115715922	11.3783	8.23848	22.9772							115711685	28.8046	6.09781	9.35404
															115715931	0.0275497	0.0187263	5.29786							115711687	3.23826	1.00816	0.001
															115715950	0.0144643	0.398113	4.93739							115711689	3.52321	0.052854	0.961986
															115715966	0.0399427	0.001	1.76127							115711699	12.0035	0.826241	1.26622
															115715971	14.1997	2.75416	19.0756							115711701	2.54294	0.001	0.0573393
															115715978	0.38322	0.401378	2.65695							115711706	63.2204	24.7327	23.2446
															115715948	0.497592	0.424737	1.17862							115711919	22.2595	0.156672	0.230477
															115715987	0.23533	0.471711	1.67933							115711930	4.72397	0.186485	1.21188
															115715998	20.8846	3.24243	42.3215							115711933	13.7351	0.234501	1.19772
															115716006	45.6761	43.5892	97.0331							115711949	12.82	0.001	0.986214
															115716024	3.56553	32.7298	252.144							115711950	11.8728	2.51884	3.39602
															115716046	18.3212	4.97405	53.2812							115711953	17.4021	0.001	0.00865767
															115716058	43.1788	41.6779	96.51							115711958	17.3102	0.001	0.001
															115716073	10.5304	5.68413	21.9794							115711964	2.58126	0.705223	0.809278
															115716074	22.851	6.64501	39.4705							115711969	1.36442	0.001	0.214965
															115716091	11.7725	9.9045	25.0569							115711970	5.97518	0.125346	0.376589
															115716109	3.16458	4.30611	18.9876							115711984	17.2059	0.940209	3.08244
															115716111	2.88057	0.933046	16.51							115711996	136.105	1.22879	7.17021
															115716138	24.51	9.97271	30.2762							115711998	4.28533	0.052037	0.59043
															115716141	0.814902	0.224547	2.09557							115712019	10.3869	4.51878	3.09565
															115716164	0.51658	1.16213	6.16							115712021	8.7154	2.95776	3.42667
															115716166	4.5702	0.164371	7.89495							115712039	22.1291	7.49284	8.38479
															115716182	16.5697	11.2422	34.2576							115712043	32.4097	7.66788	12.8877
															115716186	2.54806	0.391314	13.2724							115712047	15.3568	0.001	0.001
															115716205	9.28625	3.98176	14.0421							115712051	2.47615	0.087502	0.202182
															115716206	13.8494	14.8352	41.0843							115712059	24.8527	1.26864	6.3207
															115716224	3.75629	1.55412	6.39504							115712066	167.11	0.001	11.593
															115716225	0.404695	0.001	2.23778							115712076	35.247	12.2051	14.8252
															115716248	9.85652	8.14798	23.2498							115712084	0.879968	0.001	0.237898
															115716260	2.39037	0.613144	4.54352							115712087	102.318	0.001	0.104629
															115716263	1.67545	1.26317	3.79865							115712099	10.6034	0.001	0.001
															115716278	15.1519	13.3649	49.9957							115712107	1.61349	0.0204387	0.100187
															115716286	4.03792	4.54514	378.188							115712114	6.61801	0.0987443	0.961413
															115716289	1.14593	0.215748	5.86355							115712123	54.6743	22.1381	23.774
															115716302	1.58148	0.90984	5.03719							115712126	24.9885	10.012	12.4219
															115716311	5.63472	2.47508	8.88858							115712142	1.16659	0.001	0.101815
															115716348	5.91557	1.25638	10.6613							115712145	9.24274	0.400417	0.868991
															115716351	36.0834	17.9661	49.0716							115712149	7.44123	0.001	0.0158463
															115716365	0.383542	0.073081	1.23367							115712153	2.79449	1.35391	0.873725
															115716367	72.7672	40.4331	485.058							115712155	9.49394	0.446535	3.48952
															115716377	7.11732	5.66493	16.6306							115712163	2.67676	0.001	0.282901
															115716392	10.8389	16.3794	34.5003							115712176	2.70197	0.0831937	0.00792433
															115716399	0.471064	0.286955	0.943827							115712194	1.04428	0.011666	0.303033
															115716411	0.802544	0.15025	1.49234							115712201	11.3018	0.08657	1.86203
															115716438	2.36125	0.581099	3.62761							115712211	12.8648	0.623435	1.20819
															115716423	18.6894	38.0577	60.3769							115712222	414.92	149.87	189.799
															115716454	11.1959	3.43097	15.3499							115712225	34.0586	14.2701	13.1959
															115716457	1.70839	0.0950797	15.0126							115712228	1.59416	0.244863	0.53614
															115716467	6.92172	7.58544	16.0186							115712231	28.9698	1.48512	7.44274
															115716475	2.92915	0.859556	7.39498							115712238	5.31239	0.001	0.001
															115716516	5.34108	0.595631	12.5429							115712261	26.6342	0.247665	0.029919
															115716560	26.9356	14.4178	254.7							115712264	0.993233	0.001	0.177448
															115716563	51.3252	14.5951	92.4156							115712274	3.9755	2.05015	0.23139
															115716581	6.08526	2.95972	8.66731							115712289	3.25022	0.001	0.0176093
															115716669	6.55807	7.34907	15.9117							115712311	233.419	0.001	0.101419
															115716715	0.145642	0.0699793	8.20879							115712328	2.25792	0.052657	0.208827
															115716720	0.001	0.001	2.83939							115712331	1.38391	0.001	0.116081
															115716727	102.614	16.9464	275.57							115712336	21.3918	0.0152483	0.0776303
															115716755	2.52468	2.94422	42.7056							115712349	1.50129	0.001	0.242018
															115716776	23.1685	14.0722	50.8098							115712352	0.991293	0.065103	0.0303713
															115716830	0.992345	0.0754643	1.45463							115712367	2.95215	0.151239	0.796413
															115716853	1.84233	8.83185	16.4624							115712374	18.6599	2.15026	6.13964
															115716855	0.923065	3.31746	10.943							115712377	3.86348	1.04595	1.32284
															115716856	0.164703	0.346834	2.02437							115712379	9.37861	0.963087	3.09139
															115716864	29.7501	11.6	39.76							115712381	2.76031	0.001	0.017942
															115716842	1.00278	1.24163	4.38198							115712382	1.25073	0.001	0.0225173
															115716889	3.22256	1.9309	6.78112							115712385	20.5534	0.0298293	3.6743
															115716920	0.328209	0.0627147	1.7885							115712386	22.5301	0.348828	0.972875
															115716923	5.95343	2.2192	16.5342							115712389	5.06369	0.213903	0.176594
															115716937	7.32122	4.22066	23.5006							115712414	6.64436	0.001	1.47041
															115716955	1.85067	0.221396	5.54813							115712416	1.20849	0.55792	0.284021
															115717024	0.0220893	0.001	3.42006							115712428	2.11415	0.36771	0.460369
															115717082	0.990976	0.846381	9.10934							115712431	10.908	0.001	0.010403
															115717083	2.23468	0.906931	4.9024							115712442	1.50673	0.192826	0.4523
															115717094	39.0443	85.6122	137.374							115712453	98.5916	65.5856	22.877
															115717098	2.56862	0.195859	8.48479							115712472	0.941193	0.001	0.001
															115717108	13.1649	6.08831	33.204							115712473	3.50966	1.52997	1.44886
															115717110	1.35277	0.106322	1.98421							115712477	1.6	0.147457	0.205269
															115717120	0.56322	0.238459	9.49727							115712494	12.2088	4.59767	0.390108
															115717130	2.85412	7.33304	18.0636							115712498	219.329	43.4555	74.5646
															115717136	12.9253	18.9874	56.2697							115712505	9.90761	0.242954	2.04606
															115717176	0.001	0.001	2.2643							115712507	14.0927	3.1127	1.24791
															115717193	1.12651	1.82196	15.7725							115712518	8.41437	0.001	0.001
															115717210	6.48085	0.001	124.795							115712524	12.9715	0.583048	4.48547
															115717229	2.61544	9.48317	20.4478							115712529	2.76869	0.001	0.0298993
															115717240	0.550607	0.187687	1.17303							115712533	2.89452	0.001	0.0688887
															115717256	4.42941	0.001	12.3715							115712542	19.9074	2.84871	3.81667
															115717273	3.64282	8.46601	21.3547							115712567	3.0754	0.363453	0.239891
															115717287	8.61483	1.51804	24.3042							115712570	1.88502	0.001	0.001
															115717320	6.38355	1.01214	57.8498							115712575	446.53	49.2111	69.5473
															115717334	2.79529	2.62218	5.87733							115712592	74.4387	14.3434	17.5261
															115717344	15.9056	8.93794	44.7763							115712602	26.5202	0.256398	0.00929733
															115717368	2.18128	1.70788	9.91796							115712603	56.2227	17.4687	1.11441
															115717376	17.1167	47.3215	90.3499							115712625	6.32264	0.738373	1.3532
															115717384	9.2751	15.6184	63.2615							115712631	214.649	23.6569	47.8492
															115717412	4.26768	0.393238	12.269							115712633	19.0102	3.18852	5.55993
															115717427	0.893234	0.139207	32.3962							115712639	26.178	11.6411	0.127076
															115717430	0.209354	0.22185	4.09228							115712641	172.71	44.1355	75.5263
															115717521	0.001	0.001	17.6845							115712701	28.1844	8.38517	10.0079
															115717608	0.589629	0.001	2.26969							115712721	4.13893	0.107922	1.28966
															115717628	4.74104	32.3885	65.114							115712726	2.8991	0.217242	0.752493
															115717774	0.207234	0.001	1.30188							115712735	19.24	0.001	0.988009
															115717827	5.75405	2.75006	11.0071							115712746	222.613	47.7573	92.6709
															115717863	0.152415	0.46525	1.23215							115712790	467.189	195.551	228.675
															115717901	0.755544	1.57503	5.68266							115712791	28.2992	3.66117	3.01755
															115717939	0.001	0.001	1.45936							115712805	25.7782	4.7512	10.1271
															115717986	0.30267	0.001	7.76558							115712810	36.0804	7.69871	10.8338
															115718012	0.477949	0.245509	1.73439							115712815	185.922	1.45247	13.0032
															115718020	3.70408	0.360995	5.9031							115712817	5.46269	0.57388	0.102587
															115718158	0.001	0.0151583	1.30003							115712827	208.497	79.4118	101.574
															115718161	5.69569	2.54212	18.2084							115712828	327.968	152.225	17.0313
															115718180	3.52312	1.32349	4.51861							115712829	3.96801	0.285469	1.34153
															115718167	11.5692	12.8821	26.0738							115712832	9.65249	0.605597	1.68665
															115718403	3.06631	3.0629	13.8013							115712842	3.35864	0.001	0.182352
															115718414	0.0160207	0.048323	2.04096							115712849	21.5158	0.137664	0.464877
															115718430	6.64155	5.86954	46.3441							115712858	6.4619	2.15821	2.37221
															115718433	1.09016	0.001	10.7662							115712860	510.364	0.23738	2.1959
															115718445	0.386952	1.05283	4.96269							115712864	36.3628	1.56476	10.1653
															115718447	2.3806	0.001	6.68976							115712867	81.4253	6.44458	16.3184
															115718454	4.06523	1.95448	99.7062							115712870	35.1752	5.49152	14.0261
															115718461	10.6066	1.77956	14.5118							115712882	4.68462	2.1579	1.41091
															115718462	0.586061	0.441273	1.31093							115712902	6.37335	0.168612	0.153363
															115718463	2.37825	1.00722	3.42224							115712905	58.3142	10.7506	24.5397
															115718467	1.18443	0.943454	2.64718							115712911	0.99493	0.0375053	0.001
															115718471	0.00471	0.001	1.05511							115712923	126.143	15.6682	4.10127
															115718479	1.37625	1.07685	3.75561							115712924	4.50069	1.6261	0.511012
															115718511	0.231535	0.514933	18.3318							115712932	152.143	82.872	38.1862
															115718515	0.151785	0.0368657	3.37536							115712934	536.703	140.147	206.252
															115718516	1.61914	1.16598	7.40379							115712943	1.56785	0.036767	0.093292
															115718535	0.374702	0.0265923	4.77133							115712944	2.37219	0.249642	0.870962
															115718550	0.680998	0.184889	3.80761							115712950	2.23251	0.001	0.001
															115718565	0.103754	0.001	3.01505							115712958	30.9145	11.7501	12.8866
															115718569	3.64514	1.19519	7.8504							115712964	7.11926	0.975761	1.23203
															115718543	15.7605	18.0565	38.4615							115712997	46.9247	0.001	2.90533
															115718573	0.001	0.001	3.09857							115712999	8.26774	0.001	1.76195
															115718574	0.591488	0.28912	1.7259							115712996	10.7401	0.413797	0.63731
															115718592	0.723122	0.0280267	3.1119							115713000	14.274	0.001	0.543759
															115718602	3.25154	1.48147	6.61773							115713011	25.4035	9.91769	11.5598
															115718631	9.73658	9.38652	41.239							115713025	14.7195	0.081825	0.001
															115718634	0.0141237	0.025485	1.74475							115713030	2.77724	0.001	0.150625
															115718638	17.5769	6.25286	25.4643							115713036	10.7593	6.51031	0.421529
															115718652	3.46265	9.68804	42.0968							115713038	12.4395	1.44674	5.13939
															115718674	0.389776	0.108147	4.2011							115713050	81.8968	24.369	31.3829
															115718681	1.44929	0.001	5.99738							115713067	4.91289	0.635763	0.571935
															115718688	74.4419	62.243	346.458							115713079	111.594	3.19153	15.1238
															115718693	35.3778	11.7015	102.743							115713117	5.22079	0.726559	0.009639
															115718711	2.63775	0.98699	5.14385							115713135	6.76364	1.68356	3.16022
															115718726	0.001	0.001	1.79213							115713148	13.3426	0.859114	0.001
															115718727	0.001	0.001	2.84479							115713150	36.123	11.7717	17.2827
															115718728	0.0156627	0.001	4.94173							115713171	11.0673	0.001	0.001
															115718729	0.0605957	0.030587	11.4679							115713183	80.6992	4.54258	4.71691
															115718742	5.16215	1.54278	6.96413							115713185	28.8812	0.001	0.001
															115718764	17.2208	23.3464	53.1954							115713177	16.4267	0.259032	4.85605
															115718803	0.0116473	0.0194067	0.930075							115713205	8.66135	0.001	0.001
															115718829	3.12253	0.13356	16.6913							115713215	20.9165	0.107253	0.001
															115718857	0.001	0.0295553	0.901939							115713254	13.5496	1.30434	0.0243123
															115718860	352.466	232.449	897.269							115713239	5.9779	0.106246	0.190428
															115718865	9.69091	10.8387	21.7006							115713279	40.2158	7.75719	0.143567
															115718889	6.7606	1.25425	10.2119							115713286	221.783	49.5101	0.842553
															115718902	20.8556	24.3517	56.816							115713311	6.83152	2.02779	2.92506
															115718905	23.5197	23.7649	49.5352							115713319	28.5092	0.0758223	0.636022
															115718906	3.10044	0.241344	5.46146							115713325	30.8168	1.05519	1.14001
															115718926	7.51358	7.22435	15.4618							115713370	1.97109	0.35809	0.598042
															115718961	60.8677	46.9713	196.549							115713375	111.879	1.38137	3.45078
															115718981	10.5728	13.4846	49.7146							115713486	148.854	26.0274	39.7076
															115718998	15.5	18.4599	45.5704							115713508	19.7115	4.78041	6.68563
															115719002	7.1981	7.67691	18.6078							115713450	25.5968	10.9644	10.0197
															115719013	14.0957	22.9775	48.1115							115713687	77.6052	28.9314	33.8578
															115719016	0.304381	0.263212	1.44749							115713694	9.24469	0.001	0.277308
															115719020	5.12133	8.21492	20.374							115713754	27.8407	0.001	0.845348
															115719034	2154.38	1049.81	2640.73							115713776	2.28156	0.0533937	0.724281
															115719041	1.81861	0.240599	15.1028							115713791	4.43118	0.168247	0.902373
															115719046	4.76417	1.2683	8.32509							115713792	6.86538	0.555066	0.766461
															115719075	17.9898	11.8886	43.0906							115713814	4.78172	0.374866	0.379096
															115719120	163.456	102.401	441.268							115713877	1.89988	0.0237857	0.0645273
															115719139	16.0129	25.7238	55.7888							115713887	5.81241	1.47897	0.77132
															115719146	0.211588	0.15031	8.82368							115713902	3.19405	0.001	0.001
															115719173	6.81061	5.70145	26.9413							115713904	1.49342	0.001	0.0957027
															115719184	3.59509	0.001	26.1543							115713923	9.10794	1.00755	1.24447
															115719187	26.7271	13.4786	73.9222							115713934	19.7089	2.76558	3.3021
															115719195	7.75338	8.03218	21.5499							115713942	24.3767	3.5447	8.94958
															115719230	2.95262	2.32713	6.0789							115713967	17.5226	0.527362	5.35193
															115719239	0.095611	0.001	5.57005							115713969	36.4441	12.933	15.4211
															115719259	17.395	1.97418	92.6946							115713982	10.1954	0.0718713	1.87736
															115719260	10.9134	12.7804	48.7522							115713987	12.1296	2.98941	6.20389
															115719273	20.4353	7.47716	27.9698							115713994	1.40416	0.0265567	0.0466857
															115719280	11.107	13.6173	33.6594							115713995	2.78387	0.001	0.0250013
															115719290	2.39674	1.61653	10.7548							115714024	13.6648	0.630702	1.23825
															115719317	38.1872	16.4886	49.5121							115714032	3.16851	0.996678	0.800603
															115719364	0.32513	0.074482	6.82877							115714030	37.3299	10.9825	6.42467
															115719371	42.2209	12.0076	80.2834							115714047	27.4521	6.18052	10.6561
															115719376	1.1404	0.27394	4.57951							115714048	33.1136	4.49294	9.01174
															115719380	3.43127	0.207379	13.8797							115714054	22.3747	7.5014	11.1742
															115719385	0.265242	0.0390083	1.70803							115714062	44.0372	0.001	0.192009
															115719391	0.467967	0.266361	1.92424							115714064	31.4271	3.6296	4.50692
															115719396	1.95793	0.504004	3.37101							115714065	280.983	81.0208	129.664
															115719399	38.1546	6.02228	124.063							115714075	26.8196	0.128562	1.11624
															115719422	13.4586	6.50089	41.545							115714076	17.2033	0.0840633	0.75891
															115719423	0.595295	1.37075	6.27728							115714078	11.5203	0.022113	0.510079
															115719426	115.062	37.4864	148.454							115714083	9.60312	1.21593	2.41692
															115719431	5.69676	61.0268	180.482							115714088	220.968	124.616	4.93313
															115719438	1.80663	0.296112	46.9668							115714099	24.9459	0.477057	5.45165
															115719457	19.0791	5.80789	34.6479							115714104	101.237	18.5959	11.2504
															115719489	6.2918	11.1934	27.1621							115714108	45.0692	11.0411	12.3725
															115719492	1.73706	0.732382	3.42236							115714138	1.77445	0.001	0.385543
															115719493	3.13291	4.21291	8.6864							115714165	13.3231	0.274842	0.0313363
															115719496	0.0920663	0.33204	17.1544							115714186	6.26823	0.497133	0.618618
															115719499	0.487483	0.225305	10.677							115714193	18.013	3.04196	5.14824
															115719505	33.4556	10.2703	84.5943							115714196	44.959	17.2103	21.6889
															115719515	4.62868	3.07268	11.8989							115714198	10.5953	3.57874	5.23002
															115719538	4.09631	4.61695	11.7611							115714171	2.03629	0.001	0.237785
															115719540	3.2873	0.456068	5.03054							115714202	35.3292	8.38082	1.39626
															115719543	2.14606	2.68639	6.90993							115714218	503.104	138.108	185.361
															115719547	9.73562	7.64825	31.5362							115714225	21.2148	2.34999	7.50913
															115719548	9.86636	7.47	19.7915							115714226	86.0548	37.5674	38.2118
															115719602	24.564	13.0274	61.1031							115714234	310.313	58.0661	81.985
															115719603	14.4122	4.88664	75.2999							115714236	93.7861	36.4396	40.8668
															115719611	15.6442	4.90593	29.7036							115714258	14.9348	1.92513	3.22666
															115719622	1.65305	5.51209	9.26986							115714257	33.7806	0.891113	8.57757
															115719625	6.82093	8.71602	71.3136							115714262	13.8791	2.63746	4.16188
															115719632	0.834738	0.1373	2.02576							115714263	144.406	88.3294	27.8372
															115719644	5.3157	0.588725	8.811							115714265	6.69278	1.31546	2.20267
															115719654	21.8132	9.10053	62.6674							115714282	84.059	4.0178	3.97329
															115719664	11.5979	8.58405	27.8972							115714299	4.00225	0.0763693	0.159622
															115719679	6.58557	3.20404	8.91707							115714307	27.7559	0.001	9.60933
															115719676	1.24524	0.001	2.31239							115714308	92.8107	33.3665	22.7278
															115719686	10.2533	0.856406	50.5246							115714315	13.7117	3.32861	4.97639
															115719700	5.79157	10.1469	21.3655							115714320	24.4526	0.44693	6.25208
															115719736	1.90168	1.77785	4.03983							115714327	16.9825	2.77659	3.29563
															115719780	7.69844	0.001	121.187							115714338	20.35	1.82816	2.8451
															115719808	0.075007	0.001	6.77784							115714339	1.73781	0.001	0.0770117
															115719811	0.0789377	0.0985293	4.37465							115714347	17.9263	1.72998	2.46211
															115719848	2.94166	1.00378	3.89841							115714353	27.9235	7.13942	11.426
															115719858	2.54764	2.06009	5.3656							115714354	54.559	16.5661	13.2427
															115719849	3.47485	1.03087	9.95164							115714364	1.00841	0.001	0.001
															115719895	0.961948	0.547579	2.67979							115714366	9.88518	0.001	1.9119
															115719981	0.801776	0.228139	2.04345							115714367	11.8006	0.329664	2.34328
															115720007	0.001	0.0894563	2.74056							115714403	7.70224	2.89476	3.62225
															115720097	2.14572	0.380326	3.26874							115714406	13.888	0.001	0.372742
															115720113	0.653197	0.197923	2.024							115714415	6.47696	0.97223	2.4089
															115720160	1271.14	2387.1	7004.07							115714419	17.9552	0.094574	0.119344
															115720264	3.16029	1.39138	3.86493							115714434	1.82819	0.316962	0.030904
															115720308	0.0525053	0.179012	7.99112							115714445	1.50793	0.001	0.492887
															115720469	8.41172	10.1029	28.7747							115714443	3.26377	0.10325	0.0814703
															115720517	0.001	0.001	80.0446							115714455	3.74749	0.693557	0.001
															115720529	2.98089	2.17875	15.4637							115714456	76.0037	21.1841	31.9173
															115720561	0.0181153	0.065701	3.88512							115714457	113.182	0.789625	0.291546
															115720582	12.9782	16.4632	36.201							115714466	9.40615	0.001	1.22913
															115720584	0.78397	1.01978	3.95319							115714491	278.408	34.2932	43.0841
															115720598	7.77465	1.90264	51.6235							115714496	2.41198	0.0276607	0.268074
															115720604	9.65422	3.94677	47.6264							115714504	3.84476	0.0375867	0.200623
															115720609	0.01093	0.0931323	0.842257							115714528	8.0005	0.870054	0.335417
															115720632	2.50966	0.353791	11.0479							115714529	295.383	78.3009	132.384
															115720642	60.4929	16.3303	87.1749							115714539	5.43472	0.051348	0.632249
															115720644	2.23315	0.409552	9.50194							115714542	19.8792	0.0972163	0.041605
															115720647	0.001	0.001	1.14779							115714552	34.2182	0.001	7.43133
															115720660	12.702	2.99296	21.7377							115714568	337.166	113.578	33.2219
															115720667	8.91765	3.85667	10.9426							115714574	6.78585	2.15849	0.253596
															115720696	0.29523	0.0548477	1.31048							115714592	389.281	89.7472	12.2484
															115720706	0.597996	0.341493	1.57359							115714593	3.25554	0.0827277	0.141837
															115720719	1.55483	0.001	2.32726							115714598	28.4404	12.3165	12.9739
															115720723	6.34853	7.28059	15.1489							115714602	1.34337	0.001	0.364268
															115720724	5.43298	15.6654	27.323							115714604	8.66266	0.001	0.471081
															115720733	15.5501	7.70377	18.6902							115714610	4.94767	2.55339	0.279688
															115720754	17.0124	7.56886	22.6165							115714613	3.2229	1.31303	0.001
															115720756	0.001	0.001	0.898631							115714621	53.8849	15.4736	23.3334
															115720761	15.5556	1.56717	19.9789							115714623	6.08215	0.0447227	0.637178
															115720769	0.719442	0.792825	2.15091							115714629	0.987695	0.0282633	0.001
															115720790	9.34902	9.22291	32.3358							115714631	2.88567	0.102315	0.179625
															115720825	17.719	8.29226	21.4328							115714633	2.49626	0.194285	0.810833
															115720851	0.0866527	0.066717	3.35075							115714637	2.86911	0.001	0.001
															115720877	0.10799	0.0257053	1.97533							115714641	13.22	1.66829	2.7789
															115720913	4.61912	4.5611	11.0851							115714645	48.7092	1.02638	1.93297
															115720934	2.64173	0.922972	3.89022							115714653	1.50163	0.001	0.0362417
															115720940	1.40168	0.12027	5.02568							115714657	1.00473	0.001	0.081862
															115720943	0.415903	0.07285	2.48133							115714670	1.47737	0.001	0.001
															115720952	1.47484	0.578016	30.7122							115714675	7.22422	1.44283	2.19049
															115720956	4.94138	4.39816	12.6123							115714698	18.3178	3.10177	5.93126
															115720962	13.297	5.70416	20.4565							115714709	25.0268	0.234297	0.317707
															115720964	2.12833	0.962818	2.90962							115714712	12.5441	0.608636	0.441844
															115720968	2.61116	4.03993	10.9196							115714726	4.0005	0.951211	1.6958
															115720979	0.84372	0.277701	33.6205							115714731	2.72881	0.001	0.0972873
															115720993	0.0180397	0.001	2.50391							115714743	16.5092	3.22632	7.017
															115720997	0.001	0.001	8.64439							115714744	32.63	3.35844	6.02005
															115721022	2.91187	2.65547	12.315							115714748	4.61984	0.001	0.001
															115721036	2.64957	0.818078	3.94494							115714751	36.264	0.001	2.85464
															115721055	2.46316	2.25351	8.0736							115714766	1.00252	0.001	0.001
															115721074	0.512803	0.0328437	1.7349							115714770	3.40621	2.11345	0.250878
															115721102	0.830642	0.103776	1.15669							115714777	1.9558	0.0172643	0.001
															115721103	15.0734	6.76386	41.4472							115714784	1.50674	0.072648	0.001
															115721132	2.95421	1.39372	6.27769							115714787	66.1206	2.81982	1.63403
															115721134	4.31066	1.58794	8.98256							115714793	272.221	10.1446	16.1281
															115721141	1.93686	4.47875	10.7839							115714796	17.0796	3.71525	5.91089
															115721143	0.001	1.03173	2.28392							115714807	2.38032	0.034817	0.001
															115721158	2.84884	0.64821	6.87004							115714811	3.48179	0.701174	0.618198
															115721187	0.983271	0.829913	30.2999							115714813	2.54273	0.034817	0.001
															115721195	0.685155	0.0335137	2.90388							115714849	8.57877	1.31084	0.516492
															115721198	0.649201	1.06179	4.65147							115714857	4.56521	0.0227627	0.008189
															115721202	1.61789	0.321567	8.58786							115714862	11.7694	0.340272	0.770236
															115721205	141.577	50.1167	209.483							115714863	57.3305	36.0056	10.3854
															115721213	5.30334	5.00197	10.7038							115714864	224.595	103.354	75.4899
															115721254	2.59096	2.04944	18.6031							115714877	13.3796	1.54297	2.0275
															115721259	2.35952	0.001	3.40497							115714882	29.8399	3.64015	4.25511
															115721268	1.48808	1.03646	3.04212							115714888	13.3048	0.945872	4.86069
															115721282	0.955441	1.84559	3.98313							115714895	28.3112	0.78996	1.05887
															115721291	0.60765	2.5407	24.6457							115714907	3.67244	1.73177	1.70985
															115721296	5.88713	1.64281	12.9596							115714909	27.8583	1.95194	4.87093
															115721307	9.0914	1.13921	13.5179							115714925	38.0509	23.7149	4.00028
															115721310	0.0194887	0.001	32.8366							115714928	16.6362	3.80624	1.53312
															115721315	0.001	0.001	1.38964							115714940	22.938	5.55481	9.9245
															115721325	2.35194	0.936524	6.26671							115714949	31.8804	7.91906	5.72761
															115721351	14.1796	13.1984	29.7036							115714960	15.2323	6.49112	7.59483
															115721353	3.90721	2.39746	8.26329							115714977	20.0767	4.31998	9.73262
															115721364	0.144143	0.0294747	30.8643							115715005	8.50757	0.287757	1.23977
															115721377	26.4631	10.1394	91.1033							115715008	7.6515	0.889728	3.17896
															115721385	0.33225	0.181107	20.9214							115715010	317.148	85.0403	114.285
															115721389	3.33871	1.09606	11.6456							115715022	59.1718	1.64922	2.51542
															115721392	1.50972	0.420057	25.1605							115715029	8.8404	0.034933	0.348872
															115721399	4.82462	1.1433	18.2896							115715034	1.46592	0.001	0.299259
															115721410	1.63111	1.26757	5.76164							115715044	4.47878	0.001	0.191014
															115721422	3.36889	1.89946	7.94054							115715057	9.07638	5.20082	1.89747
															115721426	2.78744	3.80845	51.0714							115715060	30.1661	10.6567	13.8483
															115721433	155.306	30.6844	395.649							115715086	18.4069	6.2953	4.16379
															115721687	0.440449	1.28646	22.8299							115715087	6.95793	2.22632	0.554791
															115721689	0.116022	0.001	1.01908							115715095	98.88	61.6762	20.3127
															115721701	0.753434	0.395446	3.39717							115715096	12.7109	0.882872	0.742014
															115721712	7.2261	11.7316	33.0156							115715100	237.97	20.5677	7.30149
															115721725	0.597391	0.001	4.27827							115715111	2.13471	1.32062	0.537287
															115721738	1.41709	1.71135	15.103							115715119	11.9581	1.49237	0.696795
															115721748	5.93863	0.717983	36.6242							115715120	64.1001	0.001	3.57947
															115721751	25.5101	10.8991	33.0311							115715122	34.3593	0.0705087	10.1529
															115721785	16.5955	9.08643	33.339							115715123	148.64	0.237164	0.001
															115721801	41.2203	11.4411	90.2084							115715130	1.8048	0.630121	0.578176
															115721802	0.314241	0.0798117	1.04784							115715133	50.7332	5.10316	6.80029
															115721803	0.286035	0.219707	1.64768							115715152	7.59346	0.951527	1.4353
															115721806	22.347	28.4675	70.4993							115715156	0.975578	0.001	0.001
															115721810	0.0238907	0.144005	1.15287							115715157	45.6597	13.9094	17.3912
															115721811	0.440996	0.0971623	0.916781							115715158	23.7807	8.65566	10.4171
															115721829	0.750501	2.57612	9.03036							115715160	14.7755	3.88827	4.07758
															115721833	0.676529	0.119952	6.61133							115715167	21.8954	5.34422	8.98265
															115721836	1.19438	1.28603	6.82034							115715178	11.4861	0.0579353	0.001
															115721861	0.991597	0.104616	7.53221							115715183	35.5396	9.37684	1.94247
															115721868	5.74525	2.06457	8.26149							115715207	5.22918	3.62907	1.55478
															115721874	0.84422	0.0126903	1.39146							115715223	47.1009	0.324344	0.398088
															115721891	0.194814	0.313812	2.01621							115715227	12.9588	0.001	2.30078
															115721894	1.04537	0.248995	12.721							115715233	2.2707	0.001	0.367777
															115721917	1.00495	0.001	2.79652							115715241	8.56321	1.51953	3.32978
															115721920	1.65769	0.001	18.7157							115715242	24.2014	0.001	1.43764
															115721929	3.78023	0.158269	16.8056							115715243	6.31346	0.218146	1.08806
															115721937	1.66721	0.937295	7.60714							115715245	4.07107	0.303062	0.303246
															115721966	0.49668	0.001	25.9524							115715248	167.876	43.9812	81.8793
															115721974	11.7685	13.073	80.0739							115715250	10.865	0.307929	1.67414
															115721983	3.70724	16.744	158.166							115715261	27.5386	6.39933	2.19841
															115721992	0.184384	0.21055	2.31828							115715264	7.98333	0.0937947	0.731919
															115721995	2.20365	0.156663	5.41714							115715271	4.22213	1.0229	1.34168
															115721996	0.0539967	0.001	1.0667							115715277	6.67809	0.433452	0.010988
															115722005	0.0889187	0.001	28.7218							115715278	24.7946	4.82911	2.21947
															115722008	3.28527	0.878969	9.4566							115715290	45.6664	15.0163	20.4874
															115722011	1.28241	1.59554	5.9473							115715301	4.1284	0.001	0.068069
															115722036	4.0146	1.47239	12.4803							115715310	16.3354	6.58159	5.84895
															115722037	6.46982	2.54316	9.45731							115715323	6.40314	0.283007	1.16857
															115722063	0.889535	1.3611	52.9278							115715325	9.16476	0.399929	0.001
															115722087	0.1547	0.373893	2.59035							115715330	6.78661	0.210183	0.850594
															115722093	13.4329	12.3222	35.4488							115715333	30.6806	3.45146	1.11829
															115722108	0.658811	1.03976	26.8797							115715335	1.19337	0.001	0.162051
															115722121	66.5271	39.8509	300.884							115715337	4.98753	0.240515	0.526926
															115722142	11.3286	14.8971	32.2316							115715585	5.78424	1.79208	0.759289
															115722168	1.04097	0.196635	2.1127							115715587	8.25529	0.295269	0.015563
															115722180	14.1918	5.87714	22.1274							115715599	17.2968	6.24033	8.17154
															115722181	3.69407	0.001	99.9333							115715639	2.16612	0.051778	0.69025
															115722184	0.0188483	0.077482	0.883724							115715645	6.68185	0.316226	0.773197
															115722190	2.48524	0.001	5.07601							115715653	26.4028	3.53101	2.07214
															115722192	0.001	0.10851	1.57693							115715662	7.89178	0.001	1.49049
															115722198	4.55366	0.334064	11.8596							115715670	2.83754	0.724983	0.892188
															115722205	10.8685	18.1676	88.2679							115715672	7.01289	0.269548	0.550377
															115722208	18.7008	17.4581	40.486							115715674	1.8584	0.183925	0.569618
															115722237	11.2281	10.5272	28.0333							115715681	44.8055	0.386011	4.94545
															115722265	2536.51	2691.79	6079.08							115715687	11.9956	0.143765	0.336235
															115722295	46.0766	6.06538	68.2231							115715696	0.894013	0.001	0.027733
															115722303	2.2925	0.904128	6.47478							115715720	6.77958	0.337565	0.4334
															115722304	1.82334	0.42215	4.70701							115715728	8.87792	0.615805	0.735451
															115722307	16.9456	6.28504	32.8031							115715733	19.208	0.391425	0.0279683
															115722317	0.793535	0.217761	2.1287							115715743	2.93917	0.12458	0.133041
															115722318	38.1138	67.076	148.873							115715744	15.0995	2.00019	0.481915
															115722326	15.3827	11.1092	42.7888							115715749	2.892	0.001	0.144876
															115722327	3.54712	3.35257	9.20422							115715751	24.4137	11.407	3.34828
															115722328	51.3878	42.2212	118.302							115715752	1.19452	0.0819657	0.146461
															115722334	37.818	10.6711	219.352							115715755	3.61141	0.305707	0.632639
															115722337	1.86287	9.16614	22.0986							115715764	3.82049	1.2239	0.895313
															115722352	5.95111	4.47008	14.5288							115715766	16.1765	0.943481	1.69149
															115722353	0.604332	0.739168	2.38825							115715776	7.45636	0.900134	2.11738
															115722355	66.4708	32.2354	80.7476							115715779	1.62553	0.001	0.001
															115722429	0.066174	0.001	1.55701							115715784	2.69379	1.48179	0.466702
															115722448	10.7681	3.03077	13.6964							115715802	5.69816	1.21815	2.02329
															115722473	2.29675	1.33413	9.51265							115715807	55.3511	15.3414	0.181031
															115722494	9.66189	2.33078	26.0266							115715820	1.46795	0.0635143	0.145076
															115722498	3.86268	8.8067	29.6663							115715833	18.0134	4.37696	0.0801977
															115722500	5.18273	2.3585	11.2144							115715839	17.1386	4.12336	0.0563263
															115722509	13.9713	6.08128	19.5419							115715875	13.5918	0.001	0.001
															115722517	15.8114	17.0241	35.3406							115715877	22.2584	0.001	0.001
															115722528	2.47583	3.79332	8.27561							115715878	2.99046	0.001	0.0313503
															115722538	38.0256	54.0823	129.358							115715885	2.6634	0.001	0.161684
															115722548	5.51315	3.82346	19.7571							115715896	2.9302	0.039639	0.001
															115722557	5.34628	2.13018	21.3051							115715914	9.62743	0.001	0.168518
															115722566	4.99602	2.31921	16.0254							115715934	46.1455	8.34645	17.9275
															115722589	3.72875	3.87854	7.9055							115715941	1.01568	0.001	0.001
															115722598	5.90049	1.99986	8.69147							115715947	2.32053	0.001	0.001
															115722602	36.6059	32.4187	133.574							115715972	12.0599	0.524824	2.84307
															115722617	42.6603	20.271	51.4709							115715979	38.3575	5.58096	1.34153
															115722631	29.3725	27.6188	86.0612							115715985	51.4512	11.0391	22.9678
															115722641	5.82691	1.5437	8.39965							115715988	72.8951	30.1653	35.3555
															115722656	17.4357	27.5167	108.948							115715995	8.94227	0.631446	0.019071
															115722667	1.36239	1.40296	10.6036							115716002	2.95673	0.001	0.001
															115722688	2.70877	8.50669	20.4504							115716009	113.783	25.9698	53.7655
															115722694	3.95611	4.00302	69.6661							115716021	53.2336	0.358139	3.58005
															115722723	12.4544	9.40409	26.1929							115716036	8.65991	1.11121	2.58267
															115722733	3.28727	0.819475	7.59661							115716038	42.2072	0.634081	4.04776
															115722743	13.1649	7.9489	30.3663							115716040	26.2837	2.35545	2.50507
															115722744	32.1622	12.7932	41.6017							115716048	143.212	3.58401	4.28442
															115722746	42.2377	14.4442	70.4259							115716054	4.53609	0.001	0.249802
															115722759	1.15086	0.826266	8.37683							115716055	73.4329	53.9177	26.6971
															115722770	2.67648	1.123	3.42006							115716059	22.2881	2.64478	6.59834
															115722782	2.11658	0.728334	11.2944							115716063	1.15094	0.0517547	0.001
															115722797	11.4571	4.2226	61.0126							115716071	621.472	166.279	301.016
															115722806	15.7771	13.0509	35.1075							115716086	61.7835	11.1168	12.7466
															115722812	10.7395	8.40723	39.4761							115716102	12.5889	3.64234	3.81005
															115722818	0.774072	0.045754	3.85906							115716115	470.866	101.777	168.731
															115722829	28.2621	11.1043	52.0705							115716123	6.529	2.05328	2.47483
															115722878	3.85841	1.58101	5.84638							115716135	13.6446	0.568439	0.111287
															115722891	0.638749	0.169408	3.69144							115716167	36.6377	0.012115	0.0558983
															115722893	4.60219	0.572189	11.4249							115716168	19.7614	0.163908	4.39596
															115722896	10.2082	24.4956	56.0798							115716170	7.39044	2.47866	2.33474
															115722905	2.42641	0.128089	6.1868							115716172	229.809	81.6786	71.3221
															115722919	14.5014	6.61699	23.3773							115716190	34.8355	7.36082	13.2454
															115722927	2.33021	1.10406	6.19452							115716202	24.9854	2.03625	2.63148
															115722928	5.34473	2.14942	6.94638							115716207	35.8522	0.166653	2.40626
															115722933	2.31513	0.487567	8.25684							115716198	30.2664	15.1915	6.87867
															115722968	11.5371	5.9148	68.9172							115716226	11.9359	0.729047	2.87974
															115722973	5.84968	2.2437	26.8515							115716229	96.9738	10.5002	11.1584
															115722970	2.0627	0.798706	4.27053							115716230	112.716	13.8299	11.3537
															115723013	3.65423	14.3217	34.1776							115716232	12.1084	7.35701	2.74772
															115723033	32.5731	13.4757	100.274							115716241	85.2237	2.45038	0.480294
															115723035	15.0388	8.48776	36.6608							115716249	7.10776	1.97855	2.62638
															115723037	0.258177	0.219066	9.13483							115716251	9.75014	0.001	0.211408
															115723034	2.4759	1.85478	10.0742							115716265	97.2361	29.1949	10.0772
															115723038	12.1587	4.01602	15.6003							115716291	17.7972	0.0431667	0.446687
															115723039	0.566601	1.5381	11.5898							115716295	66.3535	0.183133	2.27357
															115723069	9.32316	4.31747	11.0594							115716296	30.95	0.500143	2.63527
															115723084	5.26487	2.25093	6.38882							115716323	2.17247	0.566273	0.627256
															115723106	4.75824	0.665874	15.6473							115716326	36.3836	0.001	5.25999
															115723117	2.73807	0.116163	3.90429							115716337	94.7874	22.62	12.9569
															115723130	24.1765	9.70821	35.1995							115716346	7.0508	0.220105	0.001
															115723136	1.29828	0.402463	4.578							115716382	235.697	13.1701	19.4509
															115723143	0.935557	0.884964	3.27387							115716384	2.31342	0.0966097	0.56393
															115723149	0.276415	0.001	2.41106							115716386	422.279	135.964	178.603
															115723179	2.04666	1.12865	6.71181							115716405	1.21311	0.050828	0.001
															115722899	42.5748	44.8762	108.748							115716407	26.98	0.625419	3.52419
															115723198	10.1959	3.78875	149.486							115716415	4.60071	1.982	0.829101
															115723220	22.2096	14.2786	48.8621							115716443	24.4821	0.602948	7.1096
															115723240	2.60987	2.24906	6.0098							115716448	22.0088	7.29539	8.98464
															115723269	1.38226	0.001	2.19543							115716463	4.09247	1.44081	0.181441
															115723272	1.18509	0.001	2.68462							115716485	43.0627	17.5038	14.7903
															115723275	0.555451	0.317919	1.6215							115716527	2.363	0.033525	0.491054
															115723311	2.67722	1.65304	8.92496							115716530	8.13898	0.0519783	0.530361
															115723355	1.24965	0.256337	14.1784							115716543	52.8737	0.001	1.25957
															115723385	1.27126	19.8429	49.9225							115716547	15.2612	1.72823	2.5674
															115723397	8.31017	10.213	22.3294							115716550	31.8264	3.95654	0.958217
															115723398	0.0755843	0.22296	2.08724							115716565	8.02504	2.69737	3.5862
															115723402	0.399412	0.129542	42.3889							115716570	11.556	0.001	3.25139
															115723410	10.5648	3.48233	23.2945							115716578	2.60057	0.178966	0.001
															115723426	2.41612	0.24103	3.90849							115716592	17.5399	2.79211	6.6369
															115723435	2.67297	6.01453	12.1484							115716594	17.2208	2.00343	5.04918
															115723453	0.324764	0.001	2.91156							115716595	32.4988	7.18562	16.0606
															115723455	11.322	0.54049	31.3408							115716596	14.2243	3.17682	6.56422
															115723464	1.78035	1.73564	74.1707							115716600	20.0709	5.62676	7.5035
															115723468	6.20109	6.01718	15.8518							115716604	1.3671	0.001	0.001
															115723531	3.01618	2.08313	15.3742							115716590	97.5313	0.130393	2.23186
															115723574	19.6451	1.02679	219.955							115716620	32.3441	13.6536	11.1218
															115723715	1.41854	0.0221323	2.56531							115716621	24.7702	1.67654	1.77985
															115723701	3.21735	1.18485	7.67567							115716622	4.49167	0.221557	0.518664
															115723735	0.552997	0.0174137	3.21949							115716635	26.2441	8.9235	4.66304
															115724062	0.932917	0.0519073	1.74417							115716647	322.784	64.4569	116.516
															115724068	13.5679	17.4825	71.0611							115716673	107.246	11.5905	5.52565
															115724084	2.60447	1.89931	44.5228							115716700	9.68999	3.16103	4.45806
															115724093	4.82267	8.44596	30.4697							115716676	3.85954	0.247837	0.893976
															115724105	4.76207	1.04755	13.7362							115716703	41.1781	0.309277	1.30149
															115724122	1.01689	0.681045	10.1783							115716704	7.98371	0.549305	0.574708
															115724125	1.04159	0.426279	8.66676							115716732	29.3846	19.016	6.93902
															115724126	1.18707	0.716654	9.66961							115716735	15.09	0.385672	0.022346
															115724160	0.697704	2.74728	7.49268							115716742	3.72353	0.012971	0.0599027
															115724166	1.63093	2.07526	4.55724							115716745	7.02172	0.26012	2.10488
															115724176	0.667183	0.0230317	1.71987							115716754	75.795	10.6551	9.50326
															115724204	8.16934	0.222243	15.0998							115716756	297.355	0.001	7.12337
															115724207	13.76	2.18279	32.541							115716758	7.48275	0.012194	0.210028
															115724215	0.0268777	0.001	2.87486							115716759	14.1227	5.27846	7.03947
															115724449	0.001	0.001	1.31201							115716751	24.6061	1.52804	1.06727
															115724453	13.4581	9.83489	26.9174							115716791	4.15722	0.26583	0.870097
															115724456	2.01065	3.58365	11.8172							115716792	9.39636	1.4128	2.62127
															115724459	1.21326	10.459	78.157							115716803	12.635	7.50029	3.40882
															115724460	0.08555	0.114508	1.17124							115716805	3.57671	0.001	0.014611
															115724461	12.4452	8.60109	28.6799							115716814	29.0553	0.441874	1.08826
															115724465	18.0199	21.7697	113.071							115716817	16.6108	0.001	0.155043
															115724468	13.1704	16.3137	49.2698							115716823	5.83132	0.681067	2.23485
															115724484	0.941999	0.918205	2.96101							115716825	2.56549	0.557726	0.342883
															115724495	31.6761	15.1606	47.6205							115716848	12.0767	4.75858	4.10979
															115724510	3.4545	1.44511	13.0128							115716863	1.69495	0.408932	0.166514
															115724531	0.616636	0.235895	3.35055							115716879	9.80011	1.0671	0.208043
															115724544	0.382927	0.14	1.44593							115716881	1.16802	0.001	0.325725
															115724546	15.9475	0.001	42.287							115716885	29.3322	0.131505	0.885223
															115724553	0.666273	0.920977	3.76245							115716911	7.12916	0.001	0.001
															115724555	0.137214	0.0350677	4.29089							115716917	3.89505	1.64239	1.74864
															115724565	13.7269	10.1325	29.4563							115716929	7.95803	0.99535	0.001
															115724566	3.40601	1.23392	7.15845							115716930	39.0169	0.444972	1.06625
															115724564	1.75625	0.533855	21.1357							115716931	29.5119	0.503014	10.451
															115724571	1.86268	0.315402	11.227							115716935	1.23832	0.277492	0.001
															115724573	5.22762	1.12792	11.9312							115716939	7.7512	2.89586	3.58876
															115724575	0.217655	0.195973	0.953975							115716942	18.2642	2.26942	3.87589
															115724585	63.41	55.9774	148.28							115716945	13.0716	0.268271	0.66885
															115724593	4.67604	0.001	8.80798							115716965	16.3437	0.647975	1.3624
															115724597	0.371567	0.0242887	1.40789							115716968	0.783009	0.001	0.0815357
															115724600	2.25495	2.9283	8.03956							115716979	3.69805	0.001	0.201265
															115724603	10.3695	3.6907	77.6068							115716990	20.2952	0.150329	0.335517
															115724608	1.03652	2.05812	8.81609							115716991	1.53328	0.001	0.001
															115724614	5.00194	29.6047	119.729							115716998	54.4191	3.82755	5.26662
															115724630	0.120844	0.350243	2.22797							115717012	2.51701	0.141601	0.343898
															115724666	0.033964	0.0915097	3.71292							115717018	6.40998	0.107648	0.001
															115724672	0.606567	0.181471	1.73216							115717019	1.60296	0.411536	0.3311
															115724683	0.001	0.0322457	2.53934							115717043	119.957	27.701	31.3019
															115724719	0.158014	0.001	1.4295							115717045	15.3691	2.8622	4.28799
															115724726	0.001	0.001	5.96068							115717046	3.5082	0.001	0.736045
															115724778	1.20546	0.0667617	6.71666							115717059	14.9423	4.85485	4.50039
															115724798	0.208796	0.177565	1.13577							115717090	2.23088	0.432153	0.463541
															115724831	0.278649	0.172581	1.58609							115717103	36.8357	21.5159	4.67684
															115724842	1.3797	1.19936	5.21428							115717104	42.3565	19.336	18.8483
															115724857	6.12482	5.32842	18.0078							115717106	66.0747	6.99395	5.30482
															115724869	0.001	0.001	1.02542							115717139	10.4035	3.6513	4.41489
[truncated: 867 more rows]
