# Supplementary material for: Genome-wide identification of cannabinoid biosynthesis genes in non-drug type Cannabis (Cannabis sativa L.) cultivar
Source: J Cannabis Res. 2024 Sep 7;6:35. doi: 10.1186/s42238-024-00246-8 (PMC11380790; doi:10.1186/s42238-024-00246-8)
Supplement: Supplementary file 4 — Supplementary Material 4: Supplementary Table S4. Putative Arabidopsis orthologs of hemp Cheungsam DEGs. [file 42238_2024_246_MOESM4_ESM.xlsx]

## Sheet: Sheet1
Cluster 1	Protein Refseq	TAIR10 ortholog		Cluster 2	Protein Refseq	TAIR10 ortholog		Cluster 3	Protein Refseq	TAIR10 ortholog		Cluster 4	Protein Refseq	TAIR10 ortholog		Cluster 5	Protein Refseq	TAIR10 ortholog		Cluster 6	Protein Refseq	TAIR10 ortholog
115694820	XP_030477771	AT3G52150		115695971	XP_030478945	No hit in Arabidopsis		115700759	XP_030484263	No hit in Arabidopsis		115695891	XP_030478852	No hit in Arabidopsis		115695227	XP_030478166	No hit in Arabidopsis		115694737	XP_030477688	No hit in Arabidopsis
115695667	XP_030478585	AT3G13120		115697918	XP_030480950	No hit in Arabidopsis		115714383	XP_030498928	No hit in Arabidopsis		115695892	XP_030478853	No hit in Arabidopsis		115695466	XP_030478388	No hit in Arabidopsis		115695852	XP_030478802	No hit in Arabidopsis
115695688	XP_030478614	AT4G31020		115698194	XP_030481241	No hit in Arabidopsis		115714959	XP_030499584	No hit in Arabidopsis		115700445	XP_030483843	No hit in Arabidopsis		115698247	XP_030481307	No hit in Arabidopsis		115696510	XP_030479273	No hit in Arabidopsis
115695726	XP_030478657	AT5G48930		115699539	XP_030482870	No hit in Arabidopsis		115716536	XP_030501208	No hit in Arabidopsis		115702524	XP_030485813	No hit in Arabidopsis		115700921	XP_030484456	No hit in Arabidopsis		115697128	XP_030479902	No hit in Arabidopsis
115695781	XP_030478719	AT5G18080		115700348	XP_030483776	No hit in Arabidopsis		115717016	XP_030501804	No hit in Arabidopsis		115704442	XP_030487511	No hit in Arabidopsis		115701138	XP_030484702	No hit in Arabidopsis		115697232	XP_030480017	No hit in Arabidopsis
115695784	XP_030478722	AT4G38840		115700867	XP_030484390	No hit in Arabidopsis		115718144	XP_030502964	No hit in Arabidopsis		115705093	XP_030488191	No hit in Arabidopsis		115702587	XP_030485859	No hit in Arabidopsis		115697909	XP_030480936	No hit in Arabidopsis
115695828	XP_030478776	AT2G21280		115708094	XP_030492141	No hit in Arabidopsis		115719513	XP_030504449	No hit in Arabidopsis		115705349	XP_030488531	No hit in Arabidopsis		115716834	XP_030501600	No hit in Arabidopsis		115699181	XP_030482311	No hit in Arabidopsis
115695895	XP_030478856	AT1G55260		115709080	XP_030492973	No hit in Arabidopsis		115720196	XP_030505213	No hit in Arabidopsis		115705601	XP_030488834	No hit in Arabidopsis		115719969	XP_030505017	No hit in Arabidopsis		115701261	XP_030484871	No hit in Arabidopsis
115695939	XP_030478901	AT1G29070		115716153	XP_030500752	No hit in Arabidopsis		115694719	XP_030477667	AT1G47890		115705794	XP_030489098	No hit in Arabidopsis		115720088	XP_030505110	No hit in Arabidopsis		115701495	XP_030485166	No hit in Arabidopsis
115695959	XP_030478926	AT2G21370		115718890	XP_030503558	No hit in Arabidopsis		115694757	XP_030477707	AT4G27190		115706859	XP_030490478	No hit in Arabidopsis		115720976	XP_030506064	No hit in Arabidopsis		115702426	XP_030485749	No hit in Arabidopsis
115696979	XP_030479734	AT4G20970		115719524	XP_030504464	No hit in Arabidopsis		115694846	XP_030477807	AT1G55850		115707354	XP_030491145	No hit in Arabidopsis		115722632	XP_030507751	No hit in Arabidopsis		115702505	XP_030485802	No hit in Arabidopsis
115696993	XP_030479749	AT2G34430		115719525	XP_030504465	No hit in Arabidopsis		115695048	XP_030478006	AT5G35450		115708110	XP_030492163	No hit in Arabidopsis		115724132	XP_030509460	No hit in Arabidopsis		115702557	XP_030485838	No hit in Arabidopsis
115697500	XP_030480388	AT3G08920		115725308	XP_030510636	No hit in Arabidopsis		115695604	XP_030478520	AT4G27190		115708241	XP_030492317	No hit in Arabidopsis		115724586	XP_030509762	No hit in Arabidopsis		115702653	XP_030485933	No hit in Arabidopsis
115697658	XP_030480602	AT2G37730		115694676	XP_030477620	AT4G26530		115695627	XP_030478541	AT5G58070		115710057	XP_030494236	No hit in Arabidopsis		115725501	XP_030510907	No hit in Arabidopsis		115703581	XP_030486666	No hit in Arabidopsis
115697673	XP_030480623	AT4G27450		115694690	XP_030477634	AT1G31800		115695708	XP_030478639	AT4G30230		115710117	XP_030494313	No hit in Arabidopsis		115725655	XP_030511100	No hit in Arabidopsis		115706066	XP_030489442	No hit in Arabidopsis
115697759	XP_030480741	AT1G31650		115694727	XP_030477675	AT3G13130		115695842	XP_030478790	AT3G07040		115712757	XP_030496971	No hit in Arabidopsis		115694687	XP_030477631	AT4G22970		115706407	XP_030489908	No hit in Arabidopsis
115697761	XP_030480745	AT3G53950		115694730	XP_030477680	AT2G44280		115695831	XP_030478812	AT1G02860		115713059	XP_030497401	No hit in Arabidopsis		115694722	XP_030477671	AT3G09320		115706427	XP_030489937	No hit in Arabidopsis
115697867	XP_030480889	AT3G14930		115694744	XP_030477697	AT4G28080		115695867	XP_030478819	AT5G66520		115713429	XP_030497770	No hit in Arabidopsis		115694747	XP_030477700	AT1G55900		115707531	XP_030491395	No hit in Arabidopsis
115697885	XP_030480915	AT3G51860		115694766	XP_030477712	AT4G14540		115695943	XP_030478906	AT5G57940		115713481	XP_030497828	No hit in Arabidopsis		115694761	XP_030477710	AT2G18910		115707591	XP_030491464	No hit in Arabidopsis
115698181	XP_030481226	AT5G59310		115694770	XP_030477716	AT1G55670		115695990	XP_030478966	AT5G64240		115714676	XP_030499288	No hit in Arabidopsis		115694773	XP_030477719	AT5G56220		115707934	XP_030491900	No hit in Arabidopsis
115698322	XP_030481400	AT5G02160		115694830	XP_030477780	AT3G50120		115696759	XP_030479505	AT2G38100		115715761	XP_030500292	No hit in Arabidopsis		115694784	XP_030477743	AT4G30440		115708791	XP_030492661	No hit in Arabidopsis
115698573	XP_030481530	AT3G07880		115694861	XP_030477822	AT4G37000		115696836	XP_030479579	AT1G31720		115716599	XP_030501288	No hit in Arabidopsis		115694791	XP_030477745	AT5G35160		115708892	XP_030492775	No hit in Arabidopsis
115698627	XP_030481609	AT2G43560		115694953	XP_030477916	AT5G20380		115696842	XP_030479586	AT1G62960		115717281	XP_030502112	No hit in Arabidopsis		115694801	XP_030477754	AT1G49390		115709065	XP_030492957	No hit in Arabidopsis
115698645	XP_030481632	AT2G05160		115695326	XP_030478260	AT4G32060		115696878	XP_030479625	AT1G06780		115718081	XP_030502905	No hit in Arabidopsis		115694808	XP_030477760	AT5G57520		115709849	XP_030493946	No hit in Arabidopsis
115698700	XP_030481704	AT5G14910		115695418	XP_030478343	AT2G02220		115696913	XP_030479672	AT1G13810		115718089	XP_030502912	No hit in Arabidopsis		115694831	XP_030477781	AT4G39160		115709850	XP_030493947	No hit in Arabidopsis
115699121	XP_030482225	AT1G69870		115695287	XP_030478387	AT4G08170		115696999	XP_030479758	AT2G38100		115718155	XP_030502975	No hit in Arabidopsis		115694855	XP_030477813	AT3G18430		115709853	XP_030493949	No hit in Arabidopsis
115699288	XP_030482481	AT5G09430		115695556	XP_030478473	AT3G50120		115697025	XP_030479782	AT1G47890		115720793	XP_030505831	No hit in Arabidopsis		115695436	XP_030478361	AT2G36690		115713065	XP_030497407	No hit in Arabidopsis
115699383	XP_030482623	AT3G59040		115695574	XP_030478491	AT5G23960		115697164	XP_030479933	AT1G56130		115720959	XP_030506037	No hit in Arabidopsis		115695650	XP_030478564	AT5G64310		115713862	XP_030498205	No hit in Arabidopsis
115699415	XP_030482667	AT5G36160		115695587	XP_030478504	AT5G17680		115697338	XP_030480152	AT5G02320		115722579	XP_030507680	No hit in Arabidopsis		115695657	XP_030478579	AT5G42680		115713864	XP_030498207	No hit in Arabidopsis
115699460	XP_030482744	AT5G06290		115695640	XP_030478553	AT4G28030		115697367	XP_030480204	AT2G37840		115722749	XP_030507907	No hit in Arabidopsis		115695683	XP_030478605	AT5G58030		115717038	XP_030501839	No hit in Arabidopsis
115699462	XP_030482745	AT2G33180		115695655	XP_030478572	AT2G27680		115697440	XP_030480308	AT4G27450		115724025	XP_030509341	No hit in Arabidopsis		115695698	XP_030478626	AT5G57390		115717039	XP_030501840	No hit in Arabidopsis
115699532	XP_030482857	AT5G14910		115695660	XP_030478578	AT2G34860		115697460	XP_030480335	AT2G30360		115725267	XP_030510583	No hit in Arabidopsis		115695704	XP_030478632	AT2G46490		115717129	XP_030501933	No hit in Arabidopsis
115699550	XP_030482882	AT3G02100		115695664	XP_030478581	AT1G13950		115697503	XP_030480391	AT3G51630		115725515	XP_030510926	No hit in Arabidopsis		115695745	XP_030478681	AT5G20080		115719236	XP_030504053	No hit in Arabidopsis
115699719	XP_030483109	AT3G21870		115695695	XP_030478624	AT5G58070		115697537	XP_030480449	AT1G78580		115725594	XP_030511033	No hit in Arabidopsis		115695772	XP_030478707	AT4G36360		115719331	XP_030504220	No hit in Arabidopsis
115700192	XP_030483617	AT4G09960		115695724	XP_030478655	AT1G55910		115697843	XP_030480848	AT5G62040		115694678	XP_030477622	AT3G44730		115695787	XP_030478724	AT4G14465		115720965	XP_030506044	No hit in Arabidopsis
115700242	XP_030483670	AT1G05190		115695793	XP_030478738	AT4G02530		115698176	XP_030481219	AT3G53720		115694684	XP_030477628	AT3G33530		115695795	XP_030478740	AT5G54980		115721045	XP_030506137	No hit in Arabidopsis
115700275	XP_030483703	AT4G03230		115695794	XP_030478739	AT5G57345		115698262	XP_030481327	AT4G18220		115694697	XP_030477641	AT5G01970		115695818	XP_030478759	AT3G46210		115721407	XP_030506553	No hit in Arabidopsis
115700461	XP_030483860	AT5G14320		115695876	XP_030478829	AT1G55280		115698284	XP_030481358	AT1G31200		115694699	XP_030477645	AT5G01970		115695850	XP_030478800	AT5G60920		115724740	XP_030509934	No hit in Arabidopsis
115700466	XP_030483866	AT5G15210		115695879	XP_030478833	AT2G44130		115698584	XP_030481547	AT3G27260		115694731	XP_030477681	AT5G01980		115695858	XP_030478806	AT3G18670		115724810	XP_030510022	No hit in Arabidopsis
115700494	XP_030483897	AT5G38690		115695886	XP_030478845	AT3G32930		115698628	XP_030481612	AT5G06800		115694734	XP_030477685	AT5G60020		115695863	XP_030478814	AT5G11980		115724823	XP_030510030	No hit in Arabidopsis
115700506	XP_030483911	AT1G23090		115695900	XP_030478861	AT5G66840		115698709	XP_030481715	AT5G22860		115694742	XP_030477696	AT4G34600		115695897	XP_030478858	AT1G58170		115724887	XP_030510113	No hit in Arabidopsis
115700564	XP_030483998	AT1G68670		115695945	XP_030478912	AT5G57930		115698761	XP_030481791	AT5G36880		115694781	XP_030477733	AT4G39010		115695898	XP_030478859	AT1G58170		115724949	XP_030510192	No hit in Arabidopsis
115700671	XP_030484149	AT3G28960		115695974	XP_030478948	AT4G27310		115698775	XP_030481808	AT1G42700		115694804	XP_030477756	AT3G19360		115695911	XP_030478866	AT5G10840		115725549	XP_030510969	No hit in Arabidopsis
115700738	XP_030484231	AT5G17230		115695993	XP_030478970	AT3G56400		115698860	XP_030481928	AT5G15240		115694826	XP_030477775	AT5G57340		115695921	XP_030478876	AT5G57950		115725633	XP_030511072	No hit in Arabidopsis
115700787	XP_030484291	AT3G44890		115696214	XP_030478978	AT4G22540		115698884	XP_030481947	AT1G69310		115694833	XP_030477787	AT3G13350		115695927	XP_030478883	AT5G20410		115694691	XP_030477635	AT5G23740
115700897	XP_030484425	AT4G03400		115696236	XP_030479002	AT4G19840		115698896	XP_030481958	AT2G41180		115694862	XP_030477825	AT2G26690		115696217	XP_030478980	AT5G21090		115694711	XP_030477658	AT5G55820
115700920	XP_030484455	AT3G27160		115696238	XP_030479004	AT3G15115		115698933	XP_030481995	AT1G13570		115694903	XP_030477866	AT4G30420		115696288	XP_030479056	AT3G23160		115694725	XP_030477674	AT5G57290
115701045	XP_030484590	AT2G30990		115696240	XP_030479005	AT5G45680		115699055	XP_030482160	AT2G16050		115694961	XP_030477924	AT4G10270		115696310	XP_030479076	AT2G33850		115694735	XP_030477686	AT4G27290
115701324	XP_030484943	AT1G13280		115696354	XP_030479117	AT1G24430		115699098	XP_030482194	AT2G02800		115695174	XP_030478124	AT1G71200		115696858	XP_030479600	AT2G20340		115694736	XP_030477687	AT4G27030
115701434	XP_030485096	AT3G57070		115696458	XP_030479221	AT3G24255		115699128	XP_030482260	AT2G47190		115695534	XP_030478451	AT2G34930		115696860	XP_030479602	AT2G37770		115694739	XP_030477692	AT2G21540
115701490	XP_030485162	AT3G19850		115696788	XP_030479532	AT5G02020		115699165	XP_030482288	AT2G03530		115695540	XP_030478458	AT2G21840		115696865	XP_030479609	AT3G51000		115694740	XP_030477694	AT5G57410
115701545	XP_030485220	AT4G27290		115696826	XP_030479569	AT3G15110		115699248	XP_030482423	AT4G08920		115695566	XP_030478483	AT1G55365		115696937	XP_030479692	AT1G11120		115694745	XP_030477698	AT3G44590
115701793	XP_030485287	AT2G28305		115696846	XP_030479591	AT2G34060		115699380	XP_030482612	AT2G36370		115695578	XP_030478496	AT1G55850		115696939	XP_030479694	AT1G31175		115694753	XP_030477704	AT1G09580
115702350	XP_030485675	AT1G35680		115696863	XP_030479607	AT1G31170		115699501	XP_030482810	AT1G15750		115695605	XP_030478521	AT4G10780		115696970	XP_030479723	AT1G30450		115694767	XP_030477713	AT2G02850
115702407	XP_030485736	AT3G25160		115696870	XP_030479615	AT5G44520		115699540	XP_030482867	AT2G30900		115695606	XP_030478522	AT5G47260		115697006	XP_030479768	AT5G66520		115694776	XP_030477724	AT5G14290
115702645	XP_030485925	AT4G35760		115696879	XP_030479626	AT2G30570		115699562	XP_030482899	AT1G01390		115695630	XP_030478542	AT5G57560		115697013	XP_030479773	AT5G05010		115694817	XP_030477768	AT1G60620
115702881	XP_030486196	AT1G03440		115696885	XP_030479633	AT2G24860		115699632	XP_030482996	AT3G27010		115695668	XP_030478587	AT5G37840		115697032	XP_030479789	AT5G01310		115694839	XP_030477796	AT5G57440
115702884	XP_030486203	AT3G29350		115696924	XP_030479681	AT1G29930		115699670	XP_030483049	AT1G13340		115695670	XP_030478590	AT5G49660		115697039	XP_030479798	AT5G65760		115694841	XP_030477801	AT3G08680
115703068	XP_030486415	AT2G14880		115696956	XP_030479714	AT1G45474		115699690	XP_030483073	AT3G52710		115695674	XP_030478595	AT4G03500		115697090	XP_030479858	AT2G20760		115694904	XP_030477867	AT4G23160
115703163	XP_030486529	AT4G34350		115696971	XP_030479724	AT4G21120		115699705	XP_030483092	AT1G06460		115695675	XP_030478596	AT5G56460		115697104	XP_030479907	AT4G02450		115695143	XP_030478093	AT1G54890
115703484	XP_030486643	AT3G52420		115696989	XP_030479745	AT1G65480		115699908	XP_030483312	AT5G14880		115695661	XP_030478612	AT4G02440		115697161	XP_030479927	AT1G56130		115695382	XP_030478310	AT1G34790
115703566	XP_030486653	AT3G61970		115696992	XP_030479748	ATCG00780		115700107	XP_030483528	AT5G10650		115695692	XP_030478617	AT5G25900		115697171	XP_030479945	AT1G21880		115695403	XP_030478328	AT2G36690
115703578	XP_030486664	AT5G08050		115697003	XP_030479763	AT3G16120		115700246	XP_030483677	AT5G26220		115695707	XP_030478634	AT3G23610		115697202	XP_030479975	AT2G34710		115695417	XP_030478342	AT5G54510
115703634	XP_030486731	AT4G04900		115697112	XP_030479878	AT3G54070		115700337	XP_030483766	AT5G41120		115695722	XP_030478652	AT3G20640		115697214	XP_030479992	AT4G05390		115695624	XP_030478538	AT5G64350
115703727	XP_030486822	AT3G63190		115697165	XP_030479936	AT1G56130		115700429	XP_030483831	AT5G22860		115695739	XP_030478672	AT5G52580		115697217	XP_030479999	AT4G21160		115695636	XP_030478550	AT4G26670
115704268	XP_030487342	AT5G19460		115697188	XP_030479957	AT5G06060		115700478	XP_030483878	AT2G41250		115695748	XP_030478686	AT5G54570		115697244	XP_030480031	AT1G10180		115695638	XP_030478551	AT1G16060
115704298	XP_030487371	AT4G01040		115697189	XP_030479959	AT2G29290		115700549	XP_030483972	AT5G23240		115695753	XP_030478694	AT4G36470		115697289	XP_030480089	AT2G35060		115695645	XP_030478560	AT1G78950
115704303	XP_030487375	AT4G01040		115697209	XP_030479986	AT1G30520		115700593	XP_030484048	AT3G57040		115695759	XP_030478702	AT5G66440		115697290	XP_030480091	AT2G38360		115695651	XP_030478565	AT1G52600
115704537	XP_030487598	AT5G45540		115697211	XP_030479993	AT2G19810		115700712	XP_030484201	AT4G27310		115695768	XP_030478704	AT5G38430		115697322	XP_030480128	AT4G04910		115695653	XP_030478568	AT5G20270
115704602	XP_030487662	AT2G40435		115697222	XP_030480007	AT3G45050		115700780	XP_030484280	AT5G39820		115695743	XP_030478709	AT4G02440		115697323	XP_030480130	AT3G09060		115695654	XP_030478569	AT4G13730
115704609	XP_030487670	AT4G19060		115697238	XP_030480025	AT5G58950		115700893	XP_030484420	AT3G11690		115695824	XP_030478772	AT5G62480		115697311	XP_030480159	AT1G02870		115695656	XP_030478573	AT5G16990
115704611	XP_030487671	AT5G45480		115697275	XP_030480071	AT1G31330		115700899	XP_030484426	AT4G15240		115695826	XP_030478773	AT1G55860		115697349	XP_030480173	AT3G54110		115695659	XP_030478577	AT4G26840
115704622	XP_030487684	AT3G24450		115697299	XP_030480105	AT3G08940		115700912	XP_030484447	AT4G36550		115695851	XP_030478801	AT5G15630		115697384	XP_030480226	AT3G09070		115695663	XP_030478580	AT3G26300
115704657	XP_030487721	AT4G01897		115697308	XP_030480115	AT1G57770		115700994	XP_030484532	AT5G22850		115695874	XP_030478827	AT3G13620		115697409	XP_030480258	AT2G34670		115695715	XP_030478645	AT5G64310
115704842	XP_030487914	AT1G01090		115697309	XP_030480116	AT5G13510		115701091	XP_030484649	AT1G19640		115695885	XP_030478844	AT4G15093		115697456	XP_030480327	AT1G72280		115695729	XP_030478660	AT3G26070
115705321	XP_030488494	AT4G18520		115697307	XP_030480118	AT2G43030		115701170	XP_030484742	AT2G28200		115695896	XP_030478857	AT1G58170		115697461	XP_030480336	AT4G20270		115695741	XP_030478674	AT5G52600
115705486	XP_030488687	AT2G23530		115697314	XP_030480120	AT5G16990		115701189	XP_030484774	AT4G34590		115695936	XP_030478893	AT1G51340		115697463	XP_030480339	AT1G29980		115695742	XP_030478676	AT1G20760
115705775	XP_030489073	AT1G10310		115697319	XP_030480129	AT1G08540		115701250	XP_030484858	AT1G13990		115695941	XP_030478902	AT1G73050		115697466	XP_030480344	AT2G38090		115695754	XP_030478695	AT5G43080
115705907	XP_030489231	AT4G01150		115697324	XP_030480138	AT3G09050		115701322	XP_030484940	AT3G21690		115695961	XP_030478929	AT1G22380		115697476	XP_030480358	AT5G24760		115695755	XP_030478696	AT5G43080
115706149	XP_030489547	AT2G40490		115697365	XP_030480200	AT3G14420		115701351	XP_030484980	AT3G29290		115695987	XP_030478963	AT5G64210		115697507	XP_030480398	AT1G30630		115695780	XP_030478718	AT2G21210
115706200	XP_030489629	AT3G56310		115697368	XP_030480207	AT4G18480		115701451	XP_030485116	AT3G02070		115696215	XP_030478979	AT3G54420		115697518	XP_030480418	AT2G38010		115695796	XP_030478741	AT1G19250
115706263	XP_030489711	AT3G57810		115697399	XP_030480243	AT2G34660		115701564	XP_030485243	AT2G26560		115696230	XP_030478995	AT1G11080		115697520	XP_030480419	AT5G39590		115695797	XP_030478742	AT5G57480
115706302	XP_030489763	AT1G56000		115697404	XP_030480247	AT5G40380		115701576	XP_030485255	AT4G25440		115696251	XP_030479020	AT3G15050		115697524	XP_030480429	AT2G20780		115695806	XP_030478750	AT5G57100
115706358	XP_030489838	AT1G24620		115697431	XP_030480293	AT4G31390		115701977	XP_030485302	AT1G75730		115696407	XP_030479171	AT1G80730		115697528	XP_030480432	AT1G77350		115695814	XP_030478757	AT4G27220
115706398	XP_030489898	AT3G54800		115697444	XP_030480318	AT5G19940		115702608	XP_030485886	AT4G35560		115696542	XP_030479300	AT2G33580		115697530	XP_030480437	AT1G52310		115695856	XP_030478805	AT4G31790
115706414	XP_030489920	AT4G01310		115697467	XP_030480346	AT2G35130		115702623	XP_030485904	AT3G51420		115696650	XP_030479401	AT5G06730		115697559	XP_030480487	AT4G08940		115695864	XP_030478815	AT5G23960
115706478	XP_030489998	AT1G54100		115697472	XP_030480351	AT2G34920		115702632	XP_030485913	AT3G51420		115696705	XP_030479454	AT3G47570		115697652	XP_030480595	AT5G01210		115695865	XP_030478816	AT5G23960
115706571	XP_030490119	AT4G00730		115697477	XP_030480359	AT2G33800		115702738	XP_030486032	AT1G10630		115696706	XP_030479455	AT3G47570		115697650	XP_030480597	AT4G24430		115695866	XP_030478817	AT5G23960
115706616	XP_030490187	AT4G00770		115697505	XP_030480395	AT2G37970		115702739	XP_030486033	AT1G10630		115696828	XP_030479570	AT2G42610		115697674	XP_030480625	AT1G29790		115695868	XP_030478820	AT3G13620
115706802	XP_030490396	AT3G47450		115697543	XP_030480462	AT5G46420		115702757	XP_030486052	AT4G37370		115696830	XP_030479573	AT3G47570		115697715	XP_030480672	AT1G30880		115695869	XP_030478821	AT3G18490
115706824	XP_030490433	AT3G14850		115697546	XP_030480467	AT2G38100		115702870	XP_030486180	AT4G35290		115696833	XP_030479576	AT5G60200		115697719	XP_030480677	AT4G00430		115695882	XP_030478836	AT1G49320
115706826	XP_030490435	AT1G78630		115697557	XP_030480484	AT5G46390		115702924	XP_030486255	AT4G34000		115696837	XP_030479581	AT5G02140		115697767	XP_030480751	AT2G34530		115695883	XP_030478839	AT1G49320
115706908	XP_030490538	AT1G61350		115697569	XP_030480497	AT3G26580		115702926	XP_030486258	AT2G15620		115696839	XP_030479583	AT4G00160		115697778	XP_030480764	AT3G55060		115695894	XP_030478855	AT2G44300
115706986	XP_030490632	AT1G17650		115697584	XP_030480520	AT3G14770		115702931	XP_030486263	AT2G15620		115696852	XP_030479596	AT5G44400		115697792	XP_030480777	AT4G03390		115695903	XP_030478863	AT1G55265
115707416	XP_030491233	AT1G11340		115697596	XP_030480535	AT1G30360		115702965	XP_030486304	AT2G48030		115696861	XP_030479605	AT3G12750		115697821	XP_030480814	AT4G12790		115695906	XP_030478865	AT1G26880
115707677	XP_030491569	AT2G39210		115697639	XP_030480581	AT5G02120		115703215	XP_030486589	AT2G15890		115696874	XP_030479620	AT2G37710		115697820	XP_030480818	AT5G57850		115695916	XP_030478872	AT3G13470
115707841	XP_030491783	AT1G79850		115697648	XP_030480592	AT1G75270		115703587	XP_030486673	AT5G17600		115696881	XP_030479629	AT1G34300		115697837	XP_030480839	AT1G66100		115695918	XP_030478874	AT5G55125
115707892	XP_030491845	AT2G45280		115697703	XP_030480659	AT3G55610		115703603	XP_030486692	AT1G79430		115696893	XP_030479639	AT1G30370		115697842	XP_030480844	AT3G09230		115695919	XP_030478875	AT1G73050
115708136	XP_030492193	AT3G26060		115697726	XP_030480695	AT4G32190		115703939	XP_030487028	AT1G52140		115696898	XP_030479644	AT3G19010		115697866	XP_030480888	AT1G77260		115695924	XP_030478879	AT5G06730
115708272	XP_030492358	AT5G44600		115697737	XP_030480710	AT5G01740		115704151	XP_030487230	AT1G20560		115696904	XP_030479660	AT4G20090		115697883	XP_030480912	AT1G16900		115695925	XP_030478880	AT5G15320
115708685	XP_030492529	AT5G50915		115697736	XP_030480713	AT1G65480		115704650	XP_030487711	AT3G14470		115696908	XP_030479668	AT2G30970		115697888	XP_030480920	AT5G11520		115695926	XP_030478881	AT1G73050
115708828	XP_030492704	AT1G74160		115697744	XP_030480726	AT4G24480		115704700	XP_030487759	AT3G55370		115696914	XP_030479673	AT3G11710		115697902	XP_030480931	AT4G15850		115695928	XP_030478884	AT2G26640
115708831	XP_030492707	AT2G02950		115697780	XP_030480767	AT5G53750		115704753	XP_030487817	AT3G21600		115696919	XP_030479679	AT5G06720		115697973	XP_030481009	AT2G35120		115695930	XP_030478886	AT2G20825
115709061	XP_030492952	AT1G07985		115697797	XP_030480783	AT3G53830		115704857	XP_030487927	AT3G54440		115696927	XP_030479683	AT3G21760		115697974	XP_030481010	AT4G30930		115695950	XP_030478917	AT1G05590
115709168	XP_030493068	AT1G56130		115697803	XP_030480795	AT4G19550		115704867	XP_030487935	AT3G09140		115696935	XP_030479689	AT5G02440		115697992	XP_030481029	AT3G58690		115695955	XP_030478922	AT5G16340
115709359	XP_030493304	AT2G36830		115697824	XP_030480821	AT3G19900		115704882	XP_030487954	AT4G14540		115696940	XP_030479695	AT2G34830		115698000	XP_030481035	AT4G05460		115695960	XP_030478930	AT3G50060
115709370	XP_030493316	AT1G74070		115697864	XP_030480883	AT3G51880		115705017	XP_030488114	AT4G35640		115696960	XP_030479718	AT5G57850		115698001	XP_030481036	AT4G05460		115695963	XP_030478932	AT4G14110
115709429	XP_030493392	AT5G50180		115697869	XP_030480891	AT2G37580		115705077	XP_030488175	AT5G35560		115696962	XP_030479719	AT3G09220		115698064	XP_030481106	AT2G40435		115695983	XP_030478959	AT2G24420
115709937	XP_030494062	AT4G24770		115697881	XP_030480907	AT5G01720		115705150	XP_030488249	AT4G29380		115696963	XP_030479720	AT5G45970		115698066	XP_030481108	AT5G01620		115696219	XP_030478981	AT1G28410
115710182	XP_030494385	AT1G75040		115697884	XP_030480914	AT2G42610		115705181	XP_030488291	AT2G19710		115697008	XP_030479769	AT1G31320		115698079	XP_030481119	AT5G01670		115696242	XP_030479008	AT1G61120
115710658	XP_030494876	AT5G58660		115697903	XP_030480932	AT1G30260		115705182	XP_030488292	AT5G11700		115697023	XP_030479780	AT3G53980		115698112	XP_030481147	AT3G53990		115696243	XP_030479012	AT3G09080
115711146	XP_030495343	AT4G34200		115697928	XP_030480961	AT3G14470		115705223	XP_030488350	AT4G29380		115697024	XP_030479781	AT5G44400		115698126	XP_030481159	AT5G59310		115696245	XP_030479015	AT1G29810
115711158	XP_030495354	AT5G67265		115697926	XP_030480962	AT2G25737		115705225	XP_030488353	AT3G61960		115697036	XP_030479792	AT4G33070		115698146	XP_030481184	AT1G23750		115696249	XP_030479018	AT5G45960
115711449	XP_030495653	AT5G38280		115697975	XP_030481011	AT4G15140		115705258	XP_030488398	AT3G16030		115697040	XP_030479799	AT4G26270		115698162	XP_030481201	AT5G07220		115696250	XP_030479019	AT5G44560
115711557	XP_030495770	AT5G45480		115697988	XP_030481028	AT3G47650		115705313	XP_030488481	AT1G80130		115697041	XP_030479800	AT2G38290		115698198	XP_030481248	AT1G30070		115696266	XP_030479036	AT3G26040
115712053	XP_030496133	AT3G49900		115698003	XP_030481039	AT4G38060		115705325	XP_030488495	AT3G15690		115697048	XP_030479811	AT5G16990		115698202	XP_030481253	AT3G63090		115696267	XP_030479037	AT3G26040
115712068	XP_030496145	AT1G40087		115698045	XP_030481091	AT1G68570		115705355	XP_030488542	AT3G15780		115697049	XP_030479812	AT5G16990		115698214	XP_030481273	AT5G61930		115696549	XP_030479305	AT5G01700
115712103	XP_030496195	AT2G39660		115698056	XP_030481099	AT2G43560		115705357	XP_030488545	AT1G52565		115697055	XP_030479821	AT3G18990		115698220	XP_030481280	AT5G45100		115696573	XP_030479327	AT1G59540
115712147	XP_030496249	AT1G66910		115698103	XP_030481140	AT5G01015		115705469	XP_030488664	AT5G13550		115697071	XP_030479839	AT3G17950		115698219	XP_030481282	AT1G78060		115696609	XP_030479362	AT5G01660
115712303	XP_030496424	AT5G44010		115698108	XP_030481141	AT3G54050		115705482	XP_030488681	AT2G03140		115697078	XP_030479848	AT4G27570		115698224	XP_030481284	AT3G10910		115696768	XP_030479515	AT2G46000
115712403	XP_030496531	AT4G20050		115698129	XP_030481163	AT4G20260		115705515	XP_030488717	AT2G03140		115697082	XP_030479852	AT5G46220		115698231	XP_030481290	AT1G28440		115696797	XP_030479541	AT4G18380
115712629	XP_030496796	AT1G66100		115698174	XP_030481221	AT1G78140		115705554	XP_030488773	AT5G42450		115697094	XP_030479861	AT2G37980		115698235	XP_030481296	AT2G39730		115696814	XP_030479557	AT3G54070
115712669	XP_030496856	AT1G68570		115698204	XP_030481257	AT1G50940		115705593	XP_030488827	AT2G40140		115697107	XP_030479873	AT2G38800		115698241	XP_030481302	AT5G05340		115696838	XP_030479582	AT1G21270
115712850	XP_030497100	AT4G37980		115698206	XP_030481260	AT2G38330		115705626	XP_030488880	AT4G01070		115697113	XP_030479880	AT1G15520		115698242	XP_030481303	AT3G55960		115696844	XP_030479590	AT5G02470
115712969	XP_030497272	AT5G48890		115698234	XP_030481294	AT1G64150		115705712	XP_030488985	AT3G57040		115697119	XP_030479884	AT5G03570		115698254	XP_030481317	AT2G38060		115696869	XP_030479614	AT3G09220
115713406	XP_030497753	AT1G27480		115698263	XP_030481328	AT4G18210		115705863	XP_030489169	AT5G17600		115697130	XP_030479905	AT4G15200		115698269	XP_030481338	AT1G21250		115696872	XP_030479618	AT5G59310
115714005	XP_030498365	AT4G28660		115698275	XP_030481346	AT3G09085		115705903	XP_030489226	AT5G66810		115697135	XP_030479911	AT4G08290		115698310	XP_030481389	AT3G54120		115696873	XP_030479619	AT4G21020
115714175	XP_030498612	AT2G47730		115698287	XP_030481359	AT5G02390		115705991	XP_030489348	AT4G33170		115697149	XP_030479919	AT5G46250		115698324	XP_030481404	AT1G75780		115696884	XP_030479632	AT5G44400
115714313	XP_030498825	AT3G15580		115698309	XP_030481388	AT1G30380		115706006	XP_030489360	AT2G39210		115697154	XP_030479923	AT4G08300		115698489	XP_030481419	AT5G44170		115696900	XP_030479646	AT5G42890
115714340	XP_030498868	AT1G06190		115698500	XP_030481435	AT5G15070		115706164	XP_030489568	AT1G03390		115697170	XP_030479942	AT4G18260		115698498	XP_030481433	AT1G14130		115696902	XP_030479658	AT5G05600
115714465	XP_030499049	AT3G50685		115698575	XP_030481533	AT3G11560		115706223	XP_030489661	AT3G01610		115697175	XP_030479946	AT5G46240		115698512	XP_030481451	AT5G40010		115696909	XP_030479669	AT4G20860
115714489	XP_030499070	AT1G70670		115698581	XP_030481543	AT3G55250		115706270	XP_030489717	AT3G15510		115697186	XP_030479956	AT1G29950		115698513	XP_030481452	AT5G40010		115696921	XP_030479680	AT3G54690
115714607	XP_030499211	AT5G50710		115698597	XP_030481573	AT1G52340		115706269	XP_030489719	AT5G47430		115697199	XP_030479970	AT2G34680		115698545	XP_030481487	AT1G68760		115696934	XP_030479688	AT3G58120
115714820	XP_030499446	AT4G28730		115698609	XP_030481588	AT4G38180		115706411	XP_030489916	AT1G01520		115697205	XP_030479980	AT1G60500		115698554	XP_030481505	AT5G15530		115696941	XP_030479696	AT1G31310
115715203	XP_030499905	AT1G67660		115698612	XP_030481591	AT3G01550		115706412	XP_030489918	AT1G01520		115697236	XP_030480021	AT1G31070		115698557	XP_030481509	AT3G58060		115696958	XP_030479716	AT1G31040
115715219	XP_030499921	AT1G60190		115698646	XP_030481637	AT3G52720		115706435	XP_030489946	AT3G61960		115697240	XP_030480026	AT5G25610		115698561	XP_030481513	AT2G32560		115696959	XP_030479717	AT2G37640
115715228	XP_030499959	AT3G62030		115698664	XP_030481656	AT1G45616		115706452	XP_030489966	AT5G05980		115697260	XP_030480055	AT1G77700		115698610	XP_030481589	AT1G28510		115696976	XP_030479732	AT1G30135
115715313	XP_030500027	AT4G37920		115698677	XP_030481673	AT2G32530		115706470	XP_030489987	AT1G74940		115697267	XP_030480060	AT2G33990		115698637	XP_030481626	AT5G15900		115696981	XP_030479737	AT5G01580
115715319	XP_030500034	AT5G26880		115698702	XP_030481706	AT4G37470		115706493	XP_030490015	AT2G40140		115697301	XP_030480107	AT5G02030		115698659	XP_030481649	AT5G14530		115696984	XP_030479740	AT4G20040
115715731	XP_030500258	AT3G14820		115698716	XP_030481721	AT2G36145		115706511	XP_030490042	AT5G51160		115697316	XP_030480123	AT1G31280		115698696	XP_030481696	AT2G41130		115696996	XP_030479752	AT3G08980
115715775	XP_030500309	AT5G17540		115698721	XP_030481729	AT4G37925		115706576	XP_030490131	AT4G25160		115697330	XP_030480145	AT3G08860		115698723	XP_030481727	AT3G02630		115697004	XP_030479765	AT1G30840
115716320	XP_030500945	AT1G22430		115698773	XP_030481807	AT5G04820		115706577	XP_030490134	AT4G25160		115697340	XP_030480160	AT4G20410		115698737	XP_030481750	AT4G28230		115697005	XP_030479766	AT3G53180
115716714	XP_030501449	AT5G54140		115698783	XP_030481817	AT4G27030		115706648	XP_030490225	AT3G54500		115697346	XP_030480170	AT3G54030		115698760	XP_030481790	AT3G28960		115697017	XP_030479775	AT1G53540
115716846	XP_030501611	AT1G64510		115698801	XP_030481850	AT5G25220		115706667	XP_030490241	AT3G55740		115697353	XP_030480177	AT1G28310		115698807	XP_030481853	AT3G10260		115697029	XP_030479785	AT1G80260
115716884	XP_030501657	AT2G46870		115698810	XP_030481857	AT5G60890		115706709	XP_030490284	AT3G47420		115697354	XP_030480178	AT3G52440		115698847	XP_030481908	AT5G08391		115697060	XP_030479831	AT5G01300
115716949	XP_030501736	AT4G17560		115698825	XP_030481876	AT2G42220		115706736	XP_030490319	AT2G39220		115697363	XP_030480202	AT5G12080		115698861	XP_030481932	AT2G25270		115697095	XP_030479862	AT3G54090
115717037	XP_030501837	AT5G17540		115698834	XP_030481890	AT5G40670		115706805	XP_030490398	AT2G45380		115697385	XP_030480227	AT2G38080		115698900	XP_030481960	AT5G06860		115697141	XP_030479914	AT5G53950
115717084	XP_030501882	AT1G10070		115698859	XP_030481927	AT3G16460		115706813	XP_030490413	AT1G78580		115697396	XP_030480236	AT2G33860		115698912	XP_030481975	AT3G27027		115697142	XP_030479915	AT4G18220
115717391	XP_030502217	AT5G53490		115698880	XP_030481944	AT5G54585		115706920	XP_030490551	AT3G21250		115697397	XP_030480237	AT1G21230		115698941	XP_030482004	AT5G16290		115697143	XP_030479916	AT1G61050
115718396	XP_030503022	AT5G19370		115698882	XP_030481946	AT2G26560		115706939	XP_030490578	AT2G45660		115697395	XP_030480240	AT4G31160		115698975	XP_030482049	AT1G18650		115697159	XP_030479925	AT1G58330
115718581	XP_030503251	AT3G04790		115698914	XP_030481977	AT2G39200		115707112	XP_030490821	AT1G72510		115697412	XP_030480265	AT2G21620		115699006	XP_030482076	AT2G27940		115697198	XP_030479973	AT4G08460
115718822	XP_030503498	AT5G12860		115698935	XP_030481997	AT1G45616		115707180	XP_030490914	AT3G14270		115697415	XP_030480266	AT5G05570		115699049	XP_030482117	AT5G42570		115697224	XP_030480009	AT3G44590
115718918	XP_030503597	AT5G58250		115698953	XP_030482027	AT2G31180		115707259	XP_030491018	AT1G55850		115697462	XP_030480338	AT1G28280		115699084	XP_030482165	AT3G11760		115697225	XP_030480011	AT3G44590
115718919	XP_030503598	AT3G54210		115699067	XP_030482138	AT3G27110		115707297	XP_030491067	AT5G13590		115697465	XP_030480341	AT3G54140		115699093	XP_030482189	AT5G06580		115697242	XP_030480032	AT1G75710
115718928	XP_030503615	AT1G47790		115699070	XP_030482143	AT5G40390		115707313	XP_030491087	AT4G17230		115697475	XP_030480357	AT2G34790		115699100	XP_030482197	AT5G06670		115697250	XP_030480044	AT1G38131
115718960	XP_030503650	AT4G15920		115699133	XP_030482242	AT4G32590		115707419	XP_030491237	AT4G26590		115697489	XP_030480373	AT3G54070		115699103	XP_030482199	AT5G11280		115697266	XP_030480059	AT3G09270
115718974	XP_030503668	AT1G07180		115699138	XP_030482244	AT1G06570		115707433	XP_030491292	AT4G02020		115697492	XP_030480379	AT2G34410		115699135	XP_030482241	AT5G48230		115697272	XP_030480068	AT2G34190
115719458	XP_030504379	AT4G21445		115699178	XP_030482306	AT5G14260		115707465	XP_030491300	AT4G05200		115697498	XP_030480384	AT5G54960		115699174	XP_030482301	AT4G28390		115697281	XP_030480080	AT1G53240
115719488	XP_030504422	AT5G43470		115699224	XP_030482380	AT3G58070		115707470	XP_030491305	AT5G63700		115697473	XP_030480393	AT2G47710		115699204	XP_030482352	AT3G11964		115697282	XP_030480081	AT2G34480
115719619	XP_030504583	AT2G44480		115699246	XP_030482411	AT5G03940		115707524	XP_030491387	AT1G59870		115697512	XP_030480407	AT1G73140		115699240	XP_030482396	AT1G13860		115697283	XP_030480083	AT3G16520
115719620	XP_030504584	AT5G44640		115699265	XP_030482449	AT1G66330		115707557	XP_030491425	AT4G19160		115697513	XP_030480408	AT2G37900		115699249	XP_030482419	AT2G36230		115697284	XP_030480084	AT3G16520
115720575	XP_030505575	AT4G24510		115699266	XP_030482486	AT3G62860		115707558	XP_030491426	AT4G29420		115697531	XP_030480440	AT4G18050		115699252	XP_030482426	AT1G26150		115697313	XP_030480119	AT2G38110
115720602	XP_030505613	AT4G38840		115699305	XP_030482503	AT3G25690		115707589	XP_030491466	AT5G10770		115697535	XP_030480447	AT5G46400		115699259	XP_030482437	AT3G28860		115697351	XP_030480174	AT3G54110
115721014	XP_030506100	AT4G38840		115699312	XP_030482515	AT1G68830		115707608	XP_030491482	AT3G55960		115697539	XP_030480451	AT1G29400		115699261	XP_030482441	AT5G16720		115697362	XP_030480198	AT5G02540
115721015	XP_030506101	AT4G38840		115699321	XP_030482529	AT1G13260		115707612	XP_030491485	AT3G21600		115697540	XP_030480456	AT4G31130		115699300	XP_030482495	AT2G37230		115697370	XP_030480209	AT2G37270
115721128	XP_030506236	AT2G27690		115699335	XP_030482545	AT5G15450		115707646	XP_030491526	AT3G60690		115697561	XP_030480489	AT1G17020		115699301	XP_030482496	AT1G75680		115697373	XP_030480211	AT5G02370
115721252	XP_030506368	AT5G22340		115699345	XP_030482561	AT3G01060		115707749	XP_030491654	AT4G21990		115697573	XP_030480502	AT1G29380		115699307	XP_030482509	AT1G27600		115697374	XP_030480212	AT3G09390
115721383	XP_030506527	AT4G15510		115699353	XP_030482568	AT1G06680		115707751	XP_030491661	AT3G57040		115697575	XP_030480508	AT3G57230		115699313	XP_030482519	AT4G39660		115697377	XP_030480216	AT5G44670
115721440	XP_030506597	AT4G38840		115699360	XP_030482578	AT2G13360		115707797	XP_030491727	AT1G61820		115697553	XP_030480517	AT2G47710		115699316	XP_030482522	AT1G25580		115697380	XP_030480220	AT5G45700
115721752	XP_030506688	AT2G33450		115699366	XP_030482585	AT5G04140		115707923	XP_030491887	AT5G25110		115697612	XP_030480544	AT2G42610		115699324	XP_030482535	AT1G13250		115697416	XP_030480274	AT4G31130
115722025	XP_030507002	AT3G28040		115699371	XP_030482591	AT5G46110		115707957	XP_030491936	AT4G31860		115697615	XP_030480547	AT3G08840		115699327	XP_030482538	AT1G13280		115697423	XP_030480279	AT1G55190
115722183	XP_030507181	AT4G09010		115699386	XP_030482626	AT2G04160		115708216	XP_030492292	AT3G60690		115697646	XP_030480590	AT3G55550		115699352	XP_030482567	AT1G69780		115697428	XP_030480287	AT2G38370
115722629	XP_030507745	AT4G14550		115699388	XP_030482629	AT3G21760		115708651	XP_030492491	AT2G39210		115697676	XP_030480627	AT3G19010		115699356	XP_030482577	AT5G11540		115697437	XP_030480306	AT4G31360
115722775	XP_030507944	AT2G33450		115699401	XP_030482649	AT3G57430		115708657	XP_030492500	AT2G42280		115697734	XP_030480708	AT1G30900		115699369	XP_030482589	AT3G10180		115697470	XP_030480349	AT2G03350
115722786	XP_030507971	AT1G05385		115699412	XP_030482663	AT1G05010		115708713	XP_030492568	AT2G42280		115697760	XP_030480743	AT5G45970		115699403	XP_030482652	AT5G39380		115697474	XP_030480356	AT5G01090
115722895	XP_030508114	AT5G19120		115699418	XP_030482670	AT3G07700		115708940	XP_030492826	AT4G12560		115697777	XP_030480762	AT4G18425		115699405	XP_030482656	AT5G40480		115697483	XP_030480366	AT1G73880
115723007	XP_030508263	AT3G23530		115699417	XP_030482674	AT1G21640		115709290	XP_030493216	AT3G01470		115697774	XP_030480763	AT4G32690		115699433	XP_030482690	AT1G35220		115697485	XP_030480368	AT1G28290
115723370	XP_030508688	AT3G56910		115699430	XP_030482686	AT5G41040		115709331	XP_030493272	AT3G14470		115697794	XP_030480779	AT1G29740		115699468	XP_030482754	AT2G05120		115697490	XP_030480376	AT4G20430
115723432	XP_030508780	AT1G48320		115699431	XP_030482687	AT5G41040		115709360	XP_030493305	AT1G18750		115697795	XP_030480781	AT1G64625		115699470	XP_030482757	AT3G56480		115697499	XP_030480386	AT2G38185
115724557	XP_030509724	AT4G25830		115699444	XP_030482717	AT5G40950		115709388	XP_030493336	AT3G12630		115697798	XP_030480788	AT5G06060		115699471	XP_030482759	AT5G40740		115697502	XP_030480390	AT3G55360
115724657	XP_030509855	AT1G80170		115699454	XP_030482734	AT4G21390		115709433	XP_030493438	AT2G47260		115697811	XP_030480803	AT4G04955		115699511	XP_030482826	AT3G56900		115697508	XP_030480399	AT1G73880
115724688	XP_030509886	AT5G57170		115699457	XP_030482741	AT4G21390		115709472	XP_030493448	AT3G57520		115697812	XP_030480804	AT4G16130		115699513	XP_030482829	AT4G28400		115697517	XP_030480417	AT1G29960
115725080	XP_030510358	AT1G73050		115699461	XP_030482748	AT4G09040		115709547	XP_030493531	AT3G47500		115697825	XP_030480822	AT1G23460		115699516	XP_030482834	AT1G28400		115697519	XP_030480422	AT3G63420
115725094	XP_030510378	AT5G20230		115699480	XP_030482778	AT3G01650		115709610	XP_030493606	AT5G20700		115697832	XP_030480831	AT5G37020		115699526	XP_030482845	AT3G28150		115697525	XP_030480430	AT3G51740
115725387	XP_030510757	AT5G57180		115699502	XP_030482813	AT4G09060		115709632	XP_030493641	AT1G60190		115697847	XP_030480853	AT4G03510		115699567	XP_030482904	AT5G38560		115697527	XP_030480431	AT1G11050
115725462	XP_030510853	AT4G30620		115699519	XP_030482837	AT3G19830		115709647	XP_030493668	AT5G14890		115697856	XP_030480871	AT5G01210		115699570	XP_030482907	AT2G32580		115697536	XP_030480448	AT3G14840
115725666	XP_030511111	AT5G17540		115699553	XP_030482886	AT4G24770		115709663	XP_030493681	AT3G57520		115697858	XP_030480877	AT1G61110		115699604	XP_030482958	AT4G10030		115697547	XP_030480469	AT5G08780
115722038	lncRNA			115699554	XP_030482887	AT1G16880		115709736	XP_030493780	AT4G30080		115697887	XP_030480916	AT1G30190		115699609	XP_030482960	AT3G28455		115697558	XP_030480485	AT4G25300
115705368	lncRNA			115699597	XP_030482943	AT2G37440		115709904	XP_030494017	AT3G09920		115697891	XP_030480919	AT3G53720		115699619	XP_030482973	AT1G05260		115697560	XP_030480488	AT1G29670
115713658	lncRNA			115699614	XP_030482969	AT4G32480		115709934	XP_030494057	AT3G09830		115697894	XP_030480923	AT4G28500		115699620	XP_030482974	AT1G03790		115697567	XP_030480495	AT5G45670
115705732	pseudogene			115699622	XP_030482981	AT5G57910		115710164	XP_030494359	AT5G50400		115697904	XP_030480933	AT5G42210		115699637	XP_030483004	AT4G10020		115697568	XP_030480496	AT1G29670
115705724	pseudogene			115699629	XP_030482992	AT1G13740		115710176	XP_030494377	AT2G36780		115697913	XP_030480945	AT1G30270		115699642	XP_030483006	AT2G30970		115697576	XP_030480504	AT4G18960
115705719	pseudogene			115699645	XP_030483009	AT3G27820		115710268	XP_030494489	AT1G67580		115697924	XP_030480957	AT2G38150		115699649	XP_030483013	AT1G73400		115697580	XP_030480512	AT1G68280
115710965	pseudogene			115699650	XP_030483018	AT4G03420		115711244	XP_030495436	AT2G26710		115697931	XP_030480965	AT1G78780		115699651	XP_030483019	AT4G24830		115697587	XP_030480523	AT1G68260
115717976	pseudogene			115699672	XP_030483051	AT1G68590		115711278	XP_030495473	AT3G42630		115697950	XP_030480988	AT5G25940		115699654	XP_030483022	AT1G13480		115697592	XP_030480530	AT2G34340
115716509	pseudogene			115699676	XP_030483058	AT3G07670		115711342	XP_030495539	AT5G50130		115697964	XP_030481001	AT3G09010		115699674	XP_030483054	AT5G55390		115697610	XP_030480542	AT5G23860
115706755	pseudogene			115699677	XP_030483059	AT2G04360		115711472	XP_030495671	AT5G61270		115697978	XP_030481016	AT2G26660		115699675	XP_030483057	AT4G25630		115697611	XP_030480543	AT1G53230
115708523	snoRNA			115699678	XP_030483060	AT2G43010		115711540	XP_030495752	AT3G48550		115698013	XP_030481053	AT5G01750		115699686	XP_030483070	AT5G37380		115697624	XP_030480565	AT5G39850
115703372	snRNA			115699708	XP_030483097	AT5G38660		115711602	XP_030495828	AT2G16770		115698018	XP_030481058	AT2G29050		115699736	XP_030483133	AT1G26300		115697667	XP_030480618	AT3G51590
115717709	transcribed_pseudogene			115699715	XP_030483102	AT5G45110		115711662	XP_030495896	AT3G60910		115698019	XP_030481059	AT1G29750		115699737	XP_030483134	AT5G55480		115697692	XP_030480644	AT3G51670
				115699726	XP_030483120	AT3G19800		115711925	XP_030495982	AT1G21000		115698090	XP_030481126	AT1G30760		115699748	XP_030483146	AT5G14580		115697693	XP_030480646	AT4G20870
				115699746	XP_030483144	AT5G62960		115711948	XP_030496005	AT2G01275		115698125	XP_030481158	AT4G19880		115699755	XP_030483155	AT1G26850		115697695	XP_030480650	AT5G59320
				115699751	XP_030483151	AT2G04842		115711963	XP_030496025	AT5G11650		115698131	XP_030481165	AT4G18910		115699790	XP_030483197	AT1G77400		115697697	XP_030480652	AT5G54160
				115699757	XP_030483161	AT3G23600		115712195	XP_030496309	AT1G46768		115698142	XP_030481180	AT1G61065		115699804	XP_030483225	AT3G53760		115697699	XP_030480654	AT5G54160
				115699770	XP_030483179	AT3G23600		115712210	XP_030496320	AT5G65710		115698145	XP_030481183	AT3G56190		115699845	XP_030483249	AT1G80260		115697700	XP_030480655	AT5G44400
				115699851	XP_030483254	AT2G46340		115712227	XP_030496350	AT4G37850		115698149	XP_030481190	AT1G78110		115699870	XP_030483275	AT1G47710		115697704	XP_030480660	AT2G40070
				115699971	XP_030483378	AT1G24620		115712233	XP_030496355	AT4G37790		115698152	XP_030481194	AT4G18550		115699881	XP_030483304	AT4G02400		115697710	XP_030480668	AT3G15270
				115700030	XP_030483442	AT1G76080		115712234	XP_030496356	AT5G65730		115698161	XP_030481200	AT2G38310		115699918	XP_030483328	AT2G23520		115697711	XP_030480669	AT5G44400
				115700187	XP_030483610	AT2G24610		115712362	XP_030496488	AT1G67710		115698165	XP_030481205	AT5G01520		115699996	XP_030483400	AT3G01420		115697716	XP_030480673	AT5G02190
				115700207	XP_030483631	AT1G32080		115712422	XP_030496555	AT1G24430		115698168	XP_030481209	AT4G04920		115700026	XP_030483436	AT4G02550		115697720	XP_030480678	AT4G18570
				115700219	XP_030483646	AT4G31240		115712455	XP_030496587	AT3G26300		115698184	XP_030481230	AT5G44790		115700384	XP_030483803	AT5G15150		115697724	XP_030480693	AT5G44680
				115700236	XP_030483664	AT2G21080		115712511	XP_030496656	AT4G00830		115698183	XP_030481233	AT1G78080		115700397	XP_030483816	AT1G75030		115697732	XP_030480706	AT5G02010
				115700300	XP_030483732	AT1G74970		115712526	XP_030496674	AT5G14280		115698191	XP_030481239	AT2G38500		115700426	XP_030483829	AT2G27880		115697741	XP_030480717	AT1G31335
				115700450	XP_030483848	AT3G52380		115712598	XP_030496759	AT3G07525		115698193	XP_030481240	AT5G44400		115700434	XP_030483837	AT1G75060		115697754	XP_030480735	AT2G43710
				115700453	XP_030483852	AT1G13930		115712737	XP_030496943	AT5G49760		115698192	XP_030481243	AT1G78070		115700446	XP_030483844	AT3G29180		115697755	XP_030480737	AT2G43710
				115700458	XP_030483856	AT1G25520		115712758	XP_030496974	AT1G10090		115698203	XP_030481256	AT2G38320		115700447	XP_030483845	AT5G40250		115697758	XP_030480740	AT5G37550
				115700524	XP_030483933	AT2G20570		115712793	XP_030497015	AT4G38060		115698217	XP_030481278	AT4G31940		115700448	XP_030483846	AT2G04780		115697762	XP_030480746	AT5G44400
				115700538	XP_030483958	AT3G01480		115712794	XP_030497017	AT2G20180		115698222	XP_030481281	AT1G45616		115700456	XP_030483854	AT5G06370		115697766	XP_030480753	AT5G25590
				115700557	XP_030483987	AT1G69690		115712872	XP_030497140	AT5G44090		115698227	XP_030481286	AT5G45030		115700472	XP_030483872	AT5G06680		115697769	XP_030480754	AT5G23740
				115700574	XP_030484015	AT5G03880		115712896	XP_030497171	AT2G23150		115698240	XP_030481301	AT2G33770		115700474	XP_030483875	AT3G08900		115697782	XP_030480769	AT4G21070
				115700587	XP_030484040	AT2G42750		115712995	XP_030497317	AT1G65950		115698245	XP_030481305	AT5G01400		115700475	XP_030483876	AT2G42910		115697788	XP_030480771	AT5G46280
				115700590	XP_030484042	AT1G73110		115713034	XP_030497368	AT4G33565		115698252	XP_030481315	AT1G07090		115700479	XP_030483882	AT1G75090		115697791	XP_030480775	AT5G17160
				115700624	XP_030484092	AT3G22210		115713090	XP_030497454	AT1G75250		115698256	XP_030481320	AT4G25730		115700484	XP_030483886	AT3G28917		115697802	XP_030480793	AT5G49010
				115700638	XP_030484110	AT2G42975		115713888	XP_030498228	AT5G26340		115698260	XP_030481325	AT1G30760		115700491	XP_030483894	AT4G12730		115697808	XP_030480801	AT4G31470
				115700691	XP_030484176	AT4G03410		115713900	XP_030498242	AT5G42320		115698308	XP_030481387	AT5G01360		115700515	XP_030483923	AT2G27880		115697813	XP_030480806	AT4G05430
				115700694	XP_030484180	AT3G15030		115713929	XP_030498269	AT2G20180		115698314	XP_030481393	AT4G31940		115700516	XP_030483924	AT5G37540		115697814	XP_030480807	AT5G59320
				115700697	XP_030484187	AT3G46610		115714073	XP_030498468	AT5G13400		115698470	XP_030481417	AT1G75800		115700517	XP_030483925	AT3G28917		115697823	XP_030480820	AT3G18630
				115700717	XP_030484206	AT5G52780		115714093	XP_030498492	AT5G65840		115698488	XP_030481418	AT4G28500		115700528	XP_030483941	AT1G47740		115697828	XP_030480825	AT5G59320
				115700744	XP_030484238	AT3G02380		115714155	XP_030498584	AT1G78950		115698499	XP_030481434	AT3G27200		115700532	XP_030483942	AT1G26330		115697831	XP_030480830	AT3G54950
				115700756	XP_030484257	AT1G13480		115714215	XP_030498667	AT2G22590		115698502	XP_030481438	AT5G62670		115700536	XP_030483952	AT1G69170		115697836	XP_030480838	AT5G44400
				115700762	XP_030484262	AT3G01990		115714329	XP_030498852	AT2G22540		115698515	XP_030481454	AT5G15080		115700546	XP_030483967	AT3G26670		115697853	XP_030480868	AT3G54040
				115700765	XP_030484265	AT3G01960		115714331	XP_030498854	AT5G67390		115698516	XP_030481456	AT5G15080		115700554	XP_030483983	AT3G30300		115697859	XP_030480878	AT5G44635
				115700779	XP_030484278	AT3G26744		115714342	XP_030498870	AT2G22140		115698539	XP_030481482	AT5G06470		115700562	XP_030483992	AT5G12350		115697865	XP_030480887	AT5G45950
				115700794	XP_030484302	AT1G14030		115714531	XP_030499122	AT5G24320		115698538	XP_030481483	AT1G75820		115700569	XP_030484005	AT2G41200		115697879	XP_030480905	AT2G34650
				115700797	XP_030484313	AT5G42760		115714632	XP_030499238	AT1G59740		115698558	XP_030481510	AT2G34930		115700576	XP_030484019	AT5G15800		115697880	XP_030480906	AT5G44400
				115700808	XP_030484324	AT5G42765		115714717	XP_030499335	AT4G34530		115698559	XP_030481511	AT5G06860		115700577	XP_030484021	AT1G13560		115697898	XP_030480928	AT2G34560
				115700814	XP_030484336	AT1G75210		115714799	XP_030499410	AT2G22660		115698568	XP_030481524	AT3G22060		115700580	XP_030484026	AT5G38530		115697935	XP_030480970	AT4G20050
				115700836	XP_030484360	AT2G32480		115714846	XP_030499473	AT4G37000		115698574	XP_030481531	AT3G61750		115700605	XP_030484067	AT1G20970		115697942	XP_030480977	AT1G30320
				115700848	XP_030484372	AT3G21670		115714921	XP_030499539	AT2G21970		115698586	XP_030481552	AT5G05340		115700607	XP_030484069	AT5G15740		115697954	XP_030480995	AT1G74270
				115700896	XP_030484423	AT3G17040		115714951	XP_030499574	AT1G77930		115698592	XP_030481559	AT2G30933		115700619	XP_030484088	AT2G32520		115697955	XP_030480996	AT1G22840
				115700903	XP_030484435	AT1G22630		115715078	XP_030499733	AT2G02380		115698595	XP_030481570	AT5G14570		115700641	XP_030484112	AT2G42820		115697959	XP_030480999	AT5G57123
				115700650	XP_030484498	AT1G50020		115715124	XP_030499796	AT3G52430		115698596	XP_030481572	AT5G14180		115700659	XP_030484138	AT3G25620		115697967	XP_030481006	AT5G25390
				115700962	XP_030484503	AT5G38510		115715187	XP_030499877	AT3G50810		115698617	XP_030481595	AT1G05280		115700663	XP_030484142	AT3G52580		115697972	XP_030481008	AT4G20150
				115701000	XP_030484543	AT5G48290		115715226	XP_030499926	AT4G37030		115698618	XP_030481598	AT1G77280		115700677	XP_030484161	AT2G16230		115697984	XP_030481021	AT3G59540
				115701008	XP_030484554	AT5G16080		115715297	XP_030500009	AT4G39640		115698635	XP_030481624	AT3G01840		115700686	XP_030484171	AT3G47800		115697995	XP_030481032	AT5G02230
				115701009	XP_030484555	AT5G40890		115715651	XP_030500172	AT5G23750		115698648	XP_030481638	AT5G14650		115700705	XP_030484194	AT5G14130		115698008	XP_030481048	AT1G29040
				115701011	XP_030484557	AT4G29250		115715667	XP_030500185	AT4G18210		115698657	XP_030481647	AT5G06510		115700715	XP_030484203	AT5G15490		115698016	XP_030481055	AT3G12670
				115701050	XP_030484599	AT2G30950		115715704	XP_030500226	AT4G24040		115698662	XP_030481654	AT1G68940		115700776	XP_030484276	AT3G29200		115698017	XP_030481056	AT1G30700
				115701058	XP_030484609	AT2G42690		115715741	XP_030500268	AT5G42900		115698672	XP_030481670	AT2G42940		115700786	XP_030484290	AT1G14360		115698028	XP_030481069	AT2G42800
				115701095	XP_030484650	AT1G29700		115715742	XP_030500269	AT4G16640		115698674	XP_030481671	AT3G30530		115700799	XP_030484311	AT2G21060		115698030	XP_030481071	AT1G17200
				115701115	XP_030484670	AT5G14480		115715768	XP_030500301	AT4G12300		115698715	XP_030481720	AT5G44160		115700802	XP_030484315	AT1G06550		115698033	XP_030481078	AT3G06880
				115701116	XP_030484672	AT5G22830		115715911	XP_030500445	AT1G76390		115698739	XP_030481755	AT5G06590		115700824	XP_030484346	AT4G35850		115698039	XP_030481084	AT2G45300
				115701179	XP_030484762	AT4G16740		115716003	XP_030500551	AT5G19790		115698740	XP_030481756	AT5G06570		115700847	XP_030484371	AT5G38650		115698046	XP_030481092	AT5G65860
				115701190	XP_030484770	AT3G10130		115716060	XP_030500624	AT4G17900		115698745	XP_030481769	AT4G03500		115700849	XP_030484374	AT5G55140		115698047	XP_030481094	AT1G28360
				115701208	XP_030484795	AT2G03060		115716096	XP_030500671	AT2G47820		115698755	XP_030481781	AT5G13180		115700866	XP_030484389	AT4G28100		115698049	XP_030481097	AT1G22330
				115701215	XP_030484808	AT4G10380		115716154	XP_030500754	AT5G60750		115698757	XP_030481785	AT1G68850		115700873	XP_030484396	AT1G14040		115698065	XP_030481107	AT5G02050
				115701236	XP_030484840	AT5G06530		115716158	XP_030500761	AT1G64065		115698770	XP_030481804	AT3G17030		115700879	XP_030484403	AT5G18400		115698067	XP_030481109	AT1G29010
				115701239	XP_030484847	AT1G06690		115716235	XP_030500848	AT3G51480		115698784	XP_030481818	AT1G68640		115700882	XP_030484406	AT3G04090		115698070	XP_030481115	AT1G75900
				115701247	XP_030484852	AT3G01500		115716339	XP_030500966	AT5G24600		115698797	XP_030481840	AT5G39050		115700895	XP_030484422	AT5G22790		115698074	XP_030481117	AT1G11125
				115701248	XP_030484856	AT5G22830		115716357	XP_030500994	AT3G26540		115698798	XP_030481841	AT1G14130		115700953	XP_030484491	AT4G09020		115698081	XP_030481122	AT5G01020
				115701249	XP_030484857	AT4G02790		115716397	XP_030501043	AT5G24300		115698802	XP_030481847	AT3G50160		115700980	XP_030484520	AT2G41380		115698088	XP_030481123	AT5G41170
				115701281	XP_030484892	AT5G06690		115716412	XP_030501059	AT5G23980		115698803	XP_030481848	AT3G23430		115701006	XP_030484550	AT5G38900		115698089	XP_030481124	AT3G08740
				115701285	XP_030484895	AT3G02100		115716446	XP_030501102	AT1G61500		115698808	XP_030481855	AT4G28380		115701014	XP_030484558	AT1G77620		115698095	XP_030481130	AT3G62840
				115701288	XP_030484899	AT1G68660		115716511	XP_030501180	AT1G06840		115698809	XP_030481856	AT3G50160		115701100	XP_030484659	AT3G50940		115698093	XP_030481131	AT5G01020
				115701300	XP_030484912	AT3G02150		115716623	XP_030501318	AT2G38640		115698812	XP_030481860	AT5G14390		115701141	XP_030484706	AT2G32415		115698132	XP_030481171	AT1G35910
				115701311	XP_030484931	AT1G75460		115716636	XP_030501340	AT3G48980		115698821	XP_030481872	AT5G05340		115701148	XP_030484715	AT5G15650		115698159	XP_030481197	AT1G60970
				115701338	XP_030484968	AT1G03600		115716639	XP_030501342	AT5G53550		115698836	XP_030481892	AT1G26610		115701159	XP_030484727	AT5G14220		115698164	XP_030481204	AT5G46330
				115701361	XP_030484999	AT3G12345		115716692	XP_030501410	AT2G38640		115698841	XP_030481898	AT3G21710		115701160	XP_030484728	AT5G06710		115698169	XP_030481213	AT1G30700
				115701414	XP_030485063	AT2G20890		115716771	XP_030501529	AT5G06370		115698844	XP_030481901	AT5G13080		115701252	XP_030484860	AT1G06660		115698170	XP_030481214	AT5G59320
				115701450	XP_030485115	AT3G26650		115716915	XP_030501697	AT5G62020		115698849	XP_030481910	AT5G06740		115701267	XP_030484877	AT4G22120		115698185	XP_030481232	AT5G53970
				115701459	XP_030485125	AT3G29185		115716986	XP_030501771	AT4G22950		115698856	XP_030481921	AT3G03190		115701279	XP_030484890	AT5G15900		115698190	XP_030481238	AT4G04930
				115701465	XP_030485132	AT3G44880		115717001	XP_030501785	AT5G41800		115698864	XP_030481930	AT4G03230		115701283	XP_030484894	AT1G10380		115698199	XP_030481249	AT1G30700
				115701466	XP_030485133	AT5G09650		115717049	XP_030501850	AT3G26540		115698870	XP_030481936	AT5G06839		115701293	XP_030484910	AT1G19715		115698218	XP_030481279	AT3G25690
				115701498	XP_030485171	AT3G26740		115717091	XP_030501889	AT4G10960		115698881	XP_030481945	AT5G38450		115701310	XP_030484927	AT3G27000		115698223	XP_030481283	AT1G30690
				115701503	XP_030485180	AT1G19900		115717092	XP_030501890	AT3G49200		115698891	XP_030481954	AT5G62850		115701319	XP_030484938	AT3G25590		115698236	XP_030481297	AT5G55820
				115701515	XP_030485192	AT5G39220		115717105	XP_030501908	AT2G46660		115698916	XP_030481978	AT3G27150		115701346	XP_030484977	AT1G20090		115698237	XP_030481298	AT3G09270
				115701518	XP_030485195	AT3G01180		115717117	XP_030501922	AT4G11810		115698918	XP_030481981	AT3G51680		115701362	XP_030485000	AT5G38630		115698238	XP_030481299	AT2G40610
				115701571	XP_030485250	AT3G51550		115717309	XP_030502139	AT5G62165		115698919	XP_030481982	AT2G02990		115701382	XP_030485024	AT3G57880		115698250	XP_030481312	AT3G52090
				115701577	XP_030485256	AT5G06790		115717483	XP_030502329	AT5G38280		115698925	XP_030481988	AT1G80490		115701404	XP_030485050	AT2G42370		115698258	XP_030481323	AT5G01630
				115701578	XP_030485257	AT1G14150		115717484	XP_030502330	AT5G38260		115698934	XP_030481999	AT5G34940		115701406	XP_030485052	AT4G14965		115698268	XP_030481336	AT1G30300
				115701586	XP_030485269	AT3G01660		115718111	XP_030502932	AT1G64065		115698954	XP_030482028	AT5G19790		115701409	XP_030485056	AT3G07930		115698272	XP_030481341	AT3G08947
				115701640	XP_030485278	AT5G22800		115718418	XP_030503056	AT2G26570		115698955	XP_030482029	AT5G06850		115701415	XP_030485064	AT2G20710		115698271	XP_030481345	AT4G08690
				115701777	XP_030485285	AT1G19920		115718472	XP_030503117	AT3G21510		115698957	XP_030482035	AT4G32140		115701436	XP_030485097	AT3G07930		115698278	XP_030481349	AT3G11400
				115701809	XP_030485288	AT1G75690		115718758	XP_030503441	AT3G05327		115698964	XP_030482039	AT5G48170		115701438	XP_030485101	AT5G60910		115698280	XP_030481352	AT1G07080
				115702104	XP_030485412	AT4G08570		115718897	XP_030503565	AT5G58800		115698966	XP_030482040	AT3G10120		115701443	XP_030485105	AT1G28110		115698281	XP_030481353	AT3G08880
				115702326	XP_030485638	AT1G72180		115718941	XP_030503628	AT2G28550		115698967	XP_030482044	AT5G11100		115701452	XP_030485118	AT1G13970		115698283	XP_030481357	AT5G01470
				115702328	XP_030485640	AT5G47850		115718954	XP_030503643	AT4G16690		115698978	XP_030482052	AT3G30530		115701481	XP_030485153	AT1G05310		115698285	XP_030481362	AT1G75750
				115702330	XP_030485642	AT1G35340		115718987	XP_030503680	AT2G38470		115698991	XP_030482062	AT2G36210		115701489	XP_030485161	AT5G61430		115698289	XP_030481363	AT3G54420
				115702338	XP_030485655	AT1G35460		115719059	XP_030503805	AT4G31850		115698989	XP_030482065	AT5G20280		115701536	XP_030485212	AT2G03720		115698303	XP_030481385	AT1G75750
				115702344	XP_030485666	AT4G09620		115719082	XP_030503853	AT5G42400		115699008	XP_030482078	AT3G27650		115701546	XP_030485222	AT3G11590		115698306	XP_030481386	AT1G21240
				115702361	XP_030485692	AT4G32260		115719098	XP_030503871	AT5G58620		115699036	XP_030482103	AT4G29090		115701693	XP_030485279	AT3G27230		115698312	XP_030481391	AT2G02910
				115702372	XP_030485700	AT3G63088		115719101	XP_030503875	AT3G06170		115699086	XP_030482178	AT2G35050		115701709	XP_030485280	AT1G19850		115698313	XP_030481395	AT1G19980
				115702383	XP_030485714	AT1G03020		115719095	XP_030503901	AT3G22830		115699111	XP_030482210	AT3G27870		115701945	XP_030485298	AT1G47840		115698319	XP_030481398	AT3G11210
				115702389	XP_030485718	AT3G62950		115719204	XP_030504014	AT1G71240		115699113	XP_030482213	AT3G58790		115702055	XP_030485382	AT3G45970		115698325	XP_030481403	AT2G34770
				115702395	XP_030485724	AT1G49975		115719231	XP_030504049	AT1G48910		115699126	XP_030482229	AT4G03390		115702316	XP_030485622	AT1G77620		115698339	XP_030481406	AT5G11600
				115702425	XP_030485748	AT2G26040		115719242	XP_030504059	AT4G29890		115699137	XP_030482243	AT2G32240		115702335	XP_030485653	AT1G72160		115698388	XP_030481409	AT2G17880
				115702507	XP_030485805	AT4G35250		115719254	XP_030504077	AT2G35940		115699142	XP_030482249	AT4G32570		115702342	XP_030485665	AT1G34550		115698387	XP_030481413	AT2G47690
				115702588	XP_030485860	AT3G16360		115719277	XP_030504112	AT1G09570		115699151	XP_030482259	AT5G39890		115702345	XP_030485668	AT4G09510		115698494	XP_030481427	AT2G42990
				115702651	XP_030485931	AT4G35770		115719318	XP_030504164	AT5G02390		115699161	XP_030482279	AT2G35940		115702376	XP_030485705	AT5G66170		115698496	XP_030481431	AT2G20830
				115702667	XP_030485951	AT4G35000		115719363	XP_030504234	AT3G14470		115699179	XP_030482307	AT1G51540		115702382	XP_030485713	AT3G19550		115698497	XP_030481432	AT3G28910
				115702678	XP_030485968	AT2G23370		115719388	XP_030504274	AT5G60170		115699196	XP_030482345	AT1G69830		115702472	XP_030485777	AT1G06330		115698501	XP_030481441	AT1G20060
				115702697	XP_030485985	AT1G49620		115719433	XP_030504344	AT3G05030		115699254	XP_030482428	AT3G27090		115702569	XP_030485846	AT1G19250		115698546	XP_030481488	AT2G20590
				115702730	XP_030486019	AT5G67290		115719453	XP_030504374	AT1G07230		115699268	XP_030482460	AT5G37710		115702602	XP_030485875	AT4G35520		115698549	XP_030481490	AT1G69120
				115702763	XP_030486058	AT4G37370		115719491	XP_030504425	AT5G60900		115699273	XP_030482469	AT2G01300		115702617	XP_030485898	AT2G17580		115698548	XP_030481494	AT1G20080
				115702780	XP_030486077	AT1G20020		115719526	XP_030504466	AT1G50180		115699298	XP_030482494	AT2G32260		115702620	XP_030485902	AT2G17630		115698583	XP_030481546	AT2G36090
				115702804	XP_030486101	AT1G20020		115719542	XP_030504485	AT5G58350		115699320	XP_030482527	AT1G68810		115702629	XP_030485911	AT2G17630		115698585	XP_030481551	AT3G28910
				115702815	XP_030486112	AT5G58140		115719652	XP_030504631	AT1G61560		115699332	XP_030482544	AT1G13245		115702654	XP_030485934	AT5G66050		115698587	XP_030481554	AT1G27290
				115702857	XP_030486164	AT4G38225		115719946	XP_030504977	AT5G16520		115699354	XP_030482569	AT3G02050		115702657	XP_030485942	AT5G42340		115698589	XP_030481556	AT3G02120
				115702879	XP_030486190	AT5G27280		115720122	XP_030505143	AT1G20670		115699364	XP_030482584	AT3G21240		115702668	XP_030485953	AT4G35000		115698594	XP_030481562	AT1G55730
				115702886	XP_030486201	AT5G24860		115720572	XP_030505572	AT1G64260		115699381	XP_030482620	AT5G15740		115702716	XP_030486001	AT3G50210		115698599	XP_030481577	AT1G34110
				115702892	XP_030486205	AT5G27280		115720651	XP_030505675	AT4G27950		115699387	XP_030482628	AT3G50660		115702721	XP_030486008	AT3G50210		115698602	XP_030481578	AT5G36890
				115702898	XP_030486212	AT2G20920		115720788	XP_030505826	AT3G16210		115699393	XP_030482643	AT1G77380		115702729	XP_030486018	AT3G19420		115698619	XP_030481597	AT5G40230
				115702903	XP_030486228	AT5G35960		115720531	XP_030505864	AT1G21280		115699406	XP_030482657	AT5G38640		115702731	XP_030486020	AT5G67260		115698623	XP_030481605	AT3G22142
				115702935	XP_030486268	AT4G34030		115720836	XP_030505884	AT2G27830		115699407	XP_030482658	AT2G35020		115702732	XP_030486021	AT5G67260		115698626	XP_030481608	AT4G03270
				115702949	XP_030486282	AT5G53390		115720961	XP_030506040	AT1G07200		115699420	XP_030482675	AT4G20360		115702743	XP_030486036	AT3G19420		115698651	XP_030481641	AT1G16070
				115703001	XP_030486336	AT4G34190		115721204	XP_030506323	AT1G09240		115699427	XP_030482685	AT1G26355		115702759	XP_030486057	AT1G08880		115698654	XP_030481643	AT5G40670
				115703002	XP_030486337	AT4G34190		115721238	XP_030506354	AT3G47570		115699452	XP_030482733	AT1G14930		115702771	XP_030486068	AT4G35790		115698660	XP_030481651	AT1G52855
				115703020	XP_030486357	AT2G15020		115721264	XP_030506387	AT3G16210		115699453	XP_030482736	AT1G72230		115702829	XP_030486126	AT5G06740		115698661	XP_030481652	AT5G59970
				115703051	XP_030486406	AT2G48070		115721274	XP_030506400	AT2G22540		115699458	XP_030482742	AT4G21380		115702855	XP_030486160	AT4G35320		115698667	XP_030481660	AT2G05790
				115703114	XP_030486475	AT4G02260		115721278	XP_030506405	AT3G04880		115699459	XP_030482743	AT1G68750		115702925	XP_030486257	AT1G49710		115698698	XP_030481699	AT2G32180
				115703129	XP_030486488	AT4G02370		115721418	XP_030506571	AT5G49920		115699466	XP_030482752	AT5G22400		115702932	XP_030486264	AT1G49710		115698701	XP_030481705	AT4G18960
				115703131	XP_030486491	AT4G02260		115721754	XP_030506689	AT3G04030		115699475	XP_030482766	AT4G28190		115702942	XP_030486274	AT2G28150		115698706	XP_030481710	AT1G12910
				115703134	XP_030486494	AT1G49975		115721783	XP_030506720	AT5G19040		115699476	XP_030482767	AT1G30330		115702950	XP_030486284	AT2G23360		115698708	XP_030481714	AT5G15310
				115703161	XP_030486528	AT1G49380		115721804	XP_030506742	AT1G67020		115699477	XP_030482768	AT3G02280		115702972	XP_030486307	AT4G34200		115698717	XP_030481722	AT5G16030
				115703202	XP_030486579	AT2G26500		115721825	XP_030506766	AT5G18130		115699479	XP_030482776	AT5G15790		115703006	XP_030486339	AT4G34200		115698725	XP_030481730	AT1G75270
				115703200	XP_030486581	AT4G02920		115721832	XP_030506773	AT1G14820		115699478	XP_030482777	AT1G72220		115703037	XP_030486379	AT4G33920		115698729	XP_030481735	AT3G30180
				115703236	XP_030486612	AT2G03500		115721882	XP_030506841	AT3G14470		115699495	XP_030482801	AT3G01490		115703083	XP_030486428	AT3G19620		115698743	XP_030481758	AT1G52340
				115703528	XP_030486645	AT5G19160		115721940	XP_030506906	AT1G03670		115699499	XP_030482807	AT5G40720		115703117	XP_030486477	AT5G67210		115698742	XP_030481763	AT1G21550
				115703561	XP_030486649	AT5G10690		115721967	XP_030506949	AT1G06040		115699505	XP_030482815	AT5G14090		115703119	XP_030486479	AT4G02340		115698747	XP_030481771	AT1G67180
				115703576	XP_030486662	AT1G15760		115722116	XP_030507101	AT2G01830		115699514	XP_030482831	AT1G14350		115703120	XP_030486480	AT4G02340		115698764	XP_030481797	AT1G69600
				115703582	XP_030486667	AT4G27250		115722123	XP_030507107	AT5G19140		115699541	XP_030482868	AT3G01540		115703145	XP_030486504	AT5G11730		115698765	XP_030481798	AT2G42800
				115703620	XP_030486719	AT1G03160		115722305	XP_030507344	AT1G14720		115699573	XP_030482911	AT3G02550		115703157	XP_030486520	AT3G18850		115698766	XP_030481799	AT4G15440
				115703656	XP_030486758	AT3G63140		115722425	XP_030507488	AT1G06650		115699581	XP_030482927	AT1G18670		115703158	XP_030486524	AT4G34320		115698779	XP_030481812	AT3G57030
				115703728	XP_030486820	AT3G61080		115722499	XP_030507581	AT4G14290		115699598	XP_030482945	AT1G59650		115703228	XP_030486602	AT2G19940		115698780	XP_030481814	AT5G36160
				115703736	XP_030486829	AT2G46690		115722520	XP_030507609	AT3G22810		115699600	XP_030482949	AT3G28480		115703241	XP_030486619	AT4G33945		115698781	XP_030481815	AT1G26640
				115703767	XP_030486860	AT5G54160		115722668	XP_030507795	AT3G14470		115699605	XP_030482954	AT5G40020		115703342	XP_030486637	AT2G47485		115698791	XP_030481833	AT2G03510
				115703842	XP_030486933	AT3G23560		115722669	XP_030507796	AT3G14470		115699613	XP_030482964	AT3G52470		115703420	XP_030486639	AT1G20720		115698811	XP_030481859	AT5G40610
				115703922	XP_030487019	AT3G10060		115722670	XP_030507797	AT3G14470		115699625	XP_030482986	AT5G15870		115703452	XP_030486641	AT4G02860		115698813	XP_030481861	AT2G04515
				115703930	XP_030487022	AT5G04440		115722699	XP_030507835	AT3G22750		115699656	XP_030483023	AT1G26810		115703562	XP_030486650	AT2G40390		115698819	XP_030481865	AT2G20635
				115703954	XP_030487041	AT2G40280		115723068	XP_030508337	AT2G47810		115699679	XP_030483064	AT4G09990		115703569	XP_030486659	AT1G49960		115698822	XP_030481873	AT1G27410
				115704012	XP_030487095	AT1G03090		115723102	XP_030508387	AT1G76020		115699684	XP_030483068	AT3G52600		115703577	XP_030486663	AT3G25040		115698839	XP_030481895	AT3G27640
				115704022	XP_030487108	AT4G01970		115723126	XP_030508414	AT1G05805		115699693	XP_030483077	AT1G30620		115703598	XP_030486688	AT5G34930		115698840	XP_030481897	AT1G26840
				115704044	XP_030487128	AT3G51895		115723182	XP_030508475	AT3G56630		115699694	XP_030483080	AT1G72160		115703610	XP_030486709	AT3G62160		115698848	XP_030481909	AT2G42110
				115704094	XP_030487174	AT2G39210		115723285	XP_030508585	AT5G49610		115699702	XP_030483090	AT1G14185		115703619	XP_030486716	AT3G12587		115698855	XP_030481918	AT5G40460
				115704108	XP_030487188	AT3G24420		115723363	XP_030508674	AT3G24030		115699720	XP_030483110	AT1G06470		115703637	XP_030486734	AT1G48050		115698878	XP_030481942	AT4G18590
				115704140	XP_030487219	AT3G24420		115723447	XP_030508795	AT1G06650		115699729	XP_030483124	AT1G26610		115703642	XP_030486740	AT3G56370		115698885	XP_030481948	AT1G69420
				115704169	XP_030487244	AT5G24470		115723477	XP_030508827	AT5G17700		115699730	XP_030483125	AT3G29770		115703643	XP_030486741	AT1G72280		115698889	XP_030481952	AT3G44830
				115704224	XP_030487299	AT2G22780		115724089	XP_030509405	AT1G04770		115699728	XP_030483127	AT1G71692		115703644	XP_030486742	AT1G01690		115698901	XP_030481961	AT5G06860
				115704245	XP_030487320	AT5G56580		115724110	XP_030509434	AT1G78780		115699764	XP_030483168	AT3G25560		115703653	XP_030486753	AT3G55605		115698904	XP_030481963	AT1G26840
				115704249	XP_030487325	AT4G34830		115724117	XP_030509443	AT2G26430		115699768	XP_030483175	AT5G06260		115703673	XP_030486772	AT5G39600		115698907	XP_030481965	AT1G13890
				115704335	XP_030487405	AT4G13260		115724185	XP_030509519	AT2G43060		115699774	XP_030483180	AT3G06910		115703688	XP_030486787	AT3G63120		115698911	XP_030481974	AT1G41830
				115704418	XP_030487484	AT2G39210		115724611	XP_030509791	AT5G56180		115699794	XP_030483198	AT4G21210		115703705	XP_030486800	AT5G16990		115698937	XP_030481998	AT3G52360
				115704458	XP_030487525	AT5G56580		115724729	XP_030509925	AT1G02070		115699857	XP_030483263	AT4G33300		115703759	XP_030486853	AT5G20885		115698945	XP_030482011	AT5G07050
				115704464	XP_030487531	AT3G21330		115724851	XP_030510071	AT2G13290		115699864	XP_030483268	AT2G26510		115703836	XP_030486930	AT1G49960		115698956	XP_030482031	AT1G74050
				115704506	XP_030487572	AT4G38690		115724873	XP_030510093	AT2G34930		115699904	XP_030483310	AT1G47670		115703908	XP_030487005	AT1G42440		115698960	XP_030482034	AT5G52340
				115704538	XP_030487599	AT3G07040		115724950	XP_030510193	AT5G45290		115699955	XP_030483362	AT4G31940		115703950	XP_030487037	AT2G40030		115698969	XP_030482041	AT1G05280
				115704620	XP_030487681	AT4G04640		115725003	XP_030510259	AT1G22930		115700067	XP_030483484	AT2G24520		115704008	XP_030487091	AT5G05330		115698982	XP_030482055	AT5G35670
				115704681	XP_030487739	AT4G26150		115725012	XP_030510275	AT4G32400		115700212	XP_030483636	AT4G32300		115704104	XP_030487184	AT5G20885		115699003	XP_030482072	AT1G03475
				115704727	XP_030487794	AT5G53920		115725053	XP_030510326	AT4G22200		115700226	XP_030483652	AT2G42610		115704122	XP_030487204	AT3G49720		115699015	XP_030482085	AT3G27810
				115704770	XP_030487835	AT4G29060		115725163	XP_030510457	AT5G15800		115700273	XP_030483705	AT2G23450		115704238	XP_030487313	AT2G46890		115699017	XP_030482087	AT2G01505
				115704800	XP_030487867	AT5G16010		115725213	XP_030510511	AT3G18440		115700277	XP_030483706	AT1G03495		115704221	XP_030487316	AT3G62600		115699020	XP_030482089	AT1G69180
				115704803	XP_030487869	AT2G29120		115725247	XP_030510556	AT5G55630		115700278	XP_030483710	AT1G65430		115704344	XP_030487416	AT4G34860		115699041	XP_030482108	AT5G48310
				115704804	XP_030487870	AT2G46690		115725315	XP_030510649	AT5G03650		115700299	XP_030483729	AT5G39090		115704372	XP_030487442	AT1G28110		115699046	XP_030482115	AT1G76160
				115704824	XP_030487890	AT3G61920		115725319	XP_030510658	AT5G64120		115700309	XP_030483737	AT5G46860		115704489	XP_030487552	AT1G01800		115699054	XP_030482122	AT3G27060
				115704828	XP_030487893	AT5G55570		115725384	XP_030510753	AT4G27190		115700336	XP_030483768	AT1G19300		115704556	XP_030487618	AT5G64620		115699056	XP_030482123	AT3G27050
				115704830	XP_030487898	AT5G04220		115725392	XP_030510764	AT4G25650		115700356	XP_030483783	AT3G28050		115704558	XP_030487622	AT2G21050		115699079	XP_030482156	AT3G52500
				115704893	XP_030487963	AT5G20670		115725443	XP_030510821	AT1G50680		115700361	XP_030483785	AT3G28050		115704581	XP_030487644	AT5G50340		115699091	XP_030482186	AT1G78570
				115704897	XP_030487968	AT5G21222		115725565	XP_030510991	AT3G14470		115700416	XP_030483825	AT5G42610		115704586	XP_030487648	AT1G51920		115699101	XP_030482201	AT5G11300
				115704903	XP_030487982	AT1G68010		115725612	XP_030511056	AT5G55970		115700444	XP_030483842	AT3G10500		115704651	XP_030487714	AT2G16700		115699114	XP_030482214	AT1G65590
				115704930	XP_030488008	AT1G73010		115725712	XP_030511168	AT3G26300		115700460	XP_030483859	AT3G29320		115704660	XP_030487720	AT2G46760		115699115	XP_030482216	AT1G65560
				115704957	XP_030488031	AT4G09650		115725714	XP_030511171	AT3G26300		115700482	XP_030483884	AT2G42690		115704673	XP_030487734	AT4G34980		115699118	XP_030482220	AT1G03780
				115704965	XP_030488044	AT3G19090		115725784	XP_030511253	AT3G14470		115700485	XP_030483887	AT3G01810		115704680	XP_030487738	AT1G53580		115699125	XP_030482232	AT1G80360
				115704970	XP_030488051	AT1G73010		27215476	YP_009243674	ATMG00560		115700486	XP_030483888	AT4G31980		115704759	XP_030487825	AT1G72175		115699134	XP_030482240	AT3G27200
				115704971	XP_030488052	AT1G32900		115724820	lncRNA			115700493	XP_030483896	AT1G69440		115704775	XP_030487839	AT3G51740		115699139	XP_030482245	AT2G04570
				115704992	XP_030488077	AT2G28710		115721161	lncRNA			115700518	XP_030483926	AT3G27210		115704825	XP_030487891	AT1G51760		115699148	XP_030482254	AT3G58120
				115704994	XP_030488078	AT5G25840		115706774	lncRNA			115700520	XP_030483928	AT1G26560		115704846	XP_030487917	AT3G60720		115699153	XP_030482269	AT1G78170
				115704997	XP_030488085	AT5G51160		115698854	lncRNA			115700521	XP_030483930	AT5G14550		115704899	XP_030487972	AT1G15320		115699160	XP_030482278	AT5G16250
				115705010	XP_030488100	AT3G55330		115713144	lncRNA			115700547	XP_030483968	AT5G40450		115704918	XP_030487998	AT3G60720		115699159	XP_030482280	AT1G22260
				115705026	XP_030488120	AT2G40610		115723286	lncRNA			115700582	XP_030484031	AT1G61600		115704947	XP_030488025	AT4G33985		115699168	XP_030482294	AT3G01750
				115705027	XP_030488121	AT1G71480		115710133	lncRNA			115700594	XP_030484049	AT1G16130		115704991	XP_030488076	AT2G19590		115699171	XP_030482298	AT4G12700
				115705036	XP_030488133	AT2G24395		115712300	lncRNA			115700623	XP_030484091	AT3G22200		115705047	XP_030488148	AT2G45420		115699172	XP_030482299	AT3G25860
				115705080	XP_030488180	AT3G56040		115698077	lncRNA			115700637	XP_030484108	AT2G30890		115705067	XP_030488166	AT5G62390		115699173	XP_030482300	AT5G47740
				115705090	XP_030488187	AT2G40260		115709929	lncRNA			115700645	XP_030484117	AT5G50670		115705104	XP_030488208	AT5G58730		115699199	XP_030482347	AT1G29930
				115705120	XP_030488221	AT3G56140		115721269	lncRNA			115700652	XP_030484131	AT3G01420		115705118	XP_030488219	AT2G40600		115699218	XP_030482373	AT5G06610
				115705125	XP_030488223	AT2G46790		115709211	lncRNA			115700662	XP_030484141	AT5G41920		115705141	XP_030488239	AT5G20420		115699192	XP_030482375	AT3G62830
				115705156	XP_030488256	AT2G46735		115721987	lncRNA			115700665	XP_030484144	AT1G62360		115705151	XP_030488250	AT5G19740		115699220	XP_030482376	AT2G44130
				115705138	XP_030488273	AT5G67290		115725644	lncRNA			115700666	XP_030484145	AT3G11900		115705162	XP_030488269	AT1G79340		115699225	XP_030482381	AT3G03990
				115705166	XP_030488275	AT5G56550		115718720	lncRNA			115700667	XP_030484146	AT3G60470		115705194	XP_030488310	AT5G59350		115699242	XP_030482399	AT1G05230
				115705186	XP_030488296	AT1G74960		115714711	lncRNA			115700669	XP_030484147	AT5G15250		115705198	XP_030488315	AT3G24440		115699243	XP_030482409	AT1G34640
				115705220	XP_030488347	AT1G55370		115715705	lncRNA			115700700	XP_030484191	AT5G42710		115705245	XP_030488385	AT4G32410		115699267	XP_030482459	AT1G50010
				115705224	XP_030488352	AT1G01060		115705216	lncRNA			115700725	XP_030484215	AT5G15630		115705248	XP_030488388	AT1G52360		115699278	XP_030482475	AT3G28857
				115705236	XP_030488375	AT3G56330		115696845	lncRNA			115700731	XP_030484224	AT5G60580		115705249	XP_030488389	AT2G23380		115699292	XP_030482488	AT5G13930
				115705222	XP_030488386	AT3G62550		115705124	lncRNA			115700747	XP_030484241	AT4G21380		115705252	XP_030488393	AT1G15440		115699293	XP_030482489	AT5G13930
				115705266	XP_030488409	AT1G15460		115698979	lncRNA			115700768	XP_030484269	AT3G29970		115705253	XP_030488394	AT1G79930		115699296	XP_030482492	AT3G59110
				115705278	XP_030488435	AT1G52770		115706979	lncRNA			115700771	XP_030484270	AT1G25530		115705254	XP_030488395	AT3G15730		115699297	XP_030482493	AT4G03210
				115705285	XP_030488447	AT1G80380		115702523	lncRNA			115700772	XP_030484272	AT1G25530		115705272	XP_030488422	AT1G80300		115699314	XP_030482520	AT1G68780
				115705323	XP_030488492	AT3G15840		115694717	lncRNA			115700775	XP_030484275	AT1G69160		115705274	XP_030488424	AT1G80350		115699318	XP_030482524	AT3G25700
				115705299	XP_030488502	AT1G02610		115705972	lncRNA			115700781	XP_030484282	AT1G65480		115705295	XP_030488458	AT1G27340		115699319	XP_030482525	AT1G26090
				115705339	XP_030488513	AT3G15810		115714479	lncRNA			115700821	XP_030484342	AT2G32210		115705296	XP_030488463	AT4G32910		115699323	XP_030482533	AT1G75290
				115705395	XP_030488590	AT1G19150		115703806	lncRNA			115700834	XP_030484362	AT2G16250		115705320	XP_030488490	AT1G52360		115699328	XP_030482539	AT1G26100
				115705435	XP_030488631	AT1G01140		115713057	lncRNA			115700869	XP_030484393	AT1G14190		115705324	XP_030488493	AT3G15820		115699347	XP_030482565	AT5G11550
				115705438	XP_030488634	AT4G25170		115711220	lncRNA			115700872	XP_030484395	AT1G14040		115705337	XP_030488510	AT4G13270		115699351	XP_030482566	AT2G05810
				115705453	XP_030488651	AT5G61670		115724216	pseudogene			115700902	XP_030484429	AT5G14500		115705350	XP_030488533	AT3G15680		115699357	XP_030482574	AT3G57030
				115705459	XP_030488656	AT2G39190		115717667	pseudogene			115700908	XP_030484438	AT2G32240		115705378	XP_030488574	AT2G25830		115699358	XP_030482575	AT4G36130
				115705500	XP_030488702	AT5G56550		115698535	pseudogene			115700918	XP_030484452	AT3G22160		115705382	XP_030488575	AT3G03220		115699377	XP_030482609	AT1G26480
				115705519	XP_030488721	AT4G13250		115710295	pseudogene			115700928	XP_030484466	AT3G07720		115705405	XP_030488600	AT3G14080		115699384	XP_030482625	AT3G59030
				115705531	XP_030488745	AT4G01030		115700915	pseudogene			115700934	XP_030484473	AT3G01470		115705417	XP_030488611	AT5G03300		115699396	XP_030482644	AT3G54420
				115705559	XP_030488781	AT1G79250		115725233	pseudogene			115700948	XP_030484487	AT4G38180		115705430	XP_030488624	AT3G43190		115699402	XP_030482650	AT1G07650
				115705563	XP_030488789	AT1G01320		115725231	pseudogene			115700949	XP_030484488	AT5G39785		115705477	XP_030488674	AT5G08510		115699410	XP_030482660	AT1G69420
				115705581	XP_030488811	AT5G05690		115701567	pseudogene			115700952	XP_030484494	AT1G19530		115705481	XP_030488680	AT3G16060		115699411	XP_030482661	AT3G02530
				115705582	XP_030488812	AT3G11420		115716891	pseudogene			115700961	XP_030484506	AT1G75280		115705483	XP_030488683	AT3G43190		115699421	XP_030482676	AT3G52610
				115705586	XP_030488819	AT1G12240		115720595	pseudogene			115700964	XP_030484507	AT1G04560		115705493	XP_030488692	AT1G16300		115699432	XP_030482688	AT5G41050
				115705594	XP_030488828	AT5G05580		115716854	pseudogene			115700981	XP_030484523	AT1G10760		115705509	XP_030488712	AT5G19690		115699442	XP_030482716	AT3G07770
				115705596	XP_030488830	AT2G45290		115724834	pseudogene			115700987	XP_030484528	AT2G19130		115705520	XP_030488722	AT3G44190		115699451	XP_030482732	AT1G70840
				115705598	XP_030488832	AT2G45290		115721703	pseudogene			115701027	XP_030484571	AT4G18170		115705577	XP_030488807	AT3G49250		115699472	XP_030482760	AT2G03090
				115705611	XP_030488856	AT4G01030		115708667	pseudogene			115701044	XP_030484594	AT1G27680		115705580	XP_030488810	AT5G05680		115699482	XP_030482781	AT1G80740
				115705621	XP_030488869	AT3G60590		115708484	snoRNA			115701048	XP_030484597	AT3G27960		115705608	XP_030488847	AT1G14610		115699487	XP_030482788	AT4G36130
				115705635	XP_030488889	AT1G77210		115701705	snoRNA			115701079	XP_030484636	AT1G06330		115705615	XP_030488863	AT4G32960		115699485	XP_030482789	AT2G14095
				115705639	XP_030488900	AT3G47590		115701706	snoRNA			115701076	XP_030484637	AT1G19630		115705633	XP_030488885	AT3G07660		115699488	XP_030482790	AT1G04980
				115705672	XP_030488930	AT5G50920		115701675	snoRNA			115701104	XP_030484658	AT1G13570		115705641	XP_030488902	AT2G46520		115699492	XP_030482803	AT1G47480
				115705673	XP_030488931	AT5G50920		115708497	snoRNA			115701109	XP_030484665	AT3G52490		115705644	XP_030488905	AT2G39900		115699500	XP_030482809	AT3G27330
				115705677	XP_030488936	AT4G25080		115718292	snoRNA			115701110	XP_030484666	AT5G35750		115705671	XP_030488927	AT5G23720		115699503	XP_030482812	AT5G48600
				115705680	XP_030488939	AT5G50930		115718285	snoRNA			115701137	XP_030484701	AT4G21200		115705715	XP_030488988	AT2G39970		115699504	XP_030482814	AT4G18910
				115705686	XP_030488945	AT4G13250		115708372	snoRNA			115701153	XP_030484721	AT4G04450		115705731	XP_030489011	AT1G30240		115699508	XP_030482821	AT5G40770
				115705693	XP_030488956	AT5G35970		115701704	snoRNA			115701158	XP_030484730	AT3G20640		115705739	XP_030489019	AT5G04885		115699523	XP_030482841	AT3G28180
				115705704	XP_030488973	AT3G12320		115708428	snoRNA			115701162	XP_030484731	AT5G38710		115705743	XP_030489026	AT3G21060		115699524	XP_030482842	AT3G28180
				115705705	XP_030488979	AT5G35970		115701707	snoRNA			115701174	XP_030484755	AT1G27620		115705741	XP_030489028	AT1G77130		115699527	XP_030482847	AT5G40230
				115705742	XP_030489025	AT1G79080		115724360	snoRNA			115701182	XP_030484764	AT5G39865		115705749	XP_030489036	AT5G04890		115699534	XP_030482859	AT5G40160
				115705763	XP_030489055	AT3G60590		115708487	snoRNA			115701186	XP_030484768	AT1G23710		115705790	XP_030489093	AT2G38710		115699544	XP_030482872	AT3G26050
				115705772	XP_030489070	AT5G16010						115701191	XP_030484771	AT3G11530		115705796	XP_030489100	AT2G27510		115699545	XP_030482874	AT1G14020
				115705773	XP_030489071	AT5G16010						115701196	XP_030484778	AT3G12120		115705802	XP_030489108	AT5G04750		115699555	XP_030482888	AT2G43040
				115705814	XP_030489118	AT4G33720						115701206	XP_030484794	AT2G04850		115705826	XP_030489129	AT4G29750		115699568	XP_030482905	AT1G13340
				115705832	XP_030489172	AT3G62410						115701228	XP_030484830	AT3G61750		115705834	XP_030489138	AT3G11320		115699572	XP_030482909	AT1G53580
				115705878	XP_030489185	AT3G52840						115701238	XP_030484846	AT4G35160		115705877	XP_030489187	AT5G11640		115699589	XP_030482937	AT1G73590
				115705882	XP_030489191	AT2G46220						115701240	XP_030484848	AT3G03800		115705933	XP_030489278	AT1G20160		115699593	XP_030482941	AT5G40030
				115705883	XP_030489192	AT2G39200						115701243	XP_030484853	AT1G75410		115705941	XP_030489289	AT5G17010		115699596	XP_030482942	AT2G38110
				115705990	XP_030489343	AT3G10420						115701259	XP_030484868	AT5G47650		115705988	XP_030489338	AT5G51150		115699595	XP_030482946	AT4G31840
				115705994	XP_030489346	AT5G05200						115701275	XP_030484884	AT5G39785		115706024	XP_030489381	AT5G04420		115699599	XP_030482948	AT3G28200
				115706001	XP_030489358	AT1G72510						115701278	XP_030484888	AT1G14340		115706042	XP_030489404	AT1G71440		115699607	XP_030482957	AT3G28420
				115706019	XP_030489375	AT5G03530						115701282	XP_030484893	AT2G35930		115706067	XP_030489446	AT5G04510		115699630	XP_030482994	AT1G11910
				115706020	XP_030489378	AT1G18730						115701284	XP_030484898	AT1G19715		115706077	XP_030489454	AT1G24020		115699639	XP_030483002	AT1G08360
				115706084	XP_030489460	AT4G01070						115701290	XP_030484902	AT5G39785		115706085	XP_030489461	AT5G24910		115699646	XP_030483010	AT2G32990
				115706125	XP_030489520	AT3G52840						115701295	XP_030484908	AT5G40720		115706083	XP_030489463	AT2G26310		115699664	XP_030483038	AT1G77720
				115706129	XP_030489525	AT4G26150						115701306	XP_030484921	AT5G06720		115706094	XP_030489477	AT3G52210		115699665	XP_030483043	AT2G42840
				115706142	XP_030489538	AT5G22510						115701340	XP_030484973	AT2G16430		115706095	XP_030489478	AT5G04520		115699669	XP_030483048	AT3G02490
				115706156	XP_030489556	AT5G21222						115701353	XP_030484990	AT3G30390		115706096	XP_030489479	AT5G47830		115699703	XP_030483094	AT1G71691
				115706191	XP_030489613	AT5G20140						115701355	XP_030484993	AT5G39090		115706130	XP_030489526	AT2G36890		115699712	XP_030483103	AT1G33811
				115706227	XP_030489665	AT2G39705						115701376	XP_030485021	AT1G75500		115706140	XP_030489536	AT5G17010		115699742	XP_030483139	AT5G15780
				115706229	XP_030489666	AT5G54190						115701381	XP_030485023	AT5G06390		115706153	XP_030489550	AT2G05920		115699745	XP_030483142	AT2G42740
				115706228	XP_030489669	AT2G26340						115701385	XP_030485029	AT1G30110		115706173	XP_030489577	AT5G25510		115699750	XP_030483148	AT2G36200
				115706253	XP_030489704	AT4G16120						115701405	XP_030485051	AT3G27400		115706176	XP_030489582	AT2G37060		115699756	XP_030483156	AT3G29060
				115706260	XP_030489709	AT2G46690						115701413	XP_030485059	AT2G20900		115706205	XP_030489635	AT1G68680		115699758	XP_030483158	AT3G29060
				115706266	XP_030489714	AT4G27410						115701460	XP_030485127	AT1G13635		115706203	XP_030489637	AT1G02180		115699769	XP_030483177	AT5G04800
				115706278	XP_030489728	AT3G15360						115701464	XP_030485136	AT1G75540		115706212	XP_030489649	AT1G04870		115699830	XP_030483235	AT5G15130
				115706284	XP_030489742	AT5G21430						115701470	XP_030485142	AT5G22350		115706213	XP_030489651	AT3G15380		115699876	XP_030483282	AT1G27040
				115706291	XP_030489747	AT1G42550						115701485	XP_030485157	AT1G68740		115706215	XP_030489653	AT3G52490		115699909	XP_030483313	AT1G70280
				115706303	XP_030489764	AT1G79040						115701507	XP_030485181	AT1G30540		115706232	XP_030489670	AT2G46780		115699930	XP_030483338	AT4G04880
				115706318	XP_030489790	AT1G56010						115701508	XP_030485183	AT1G70840		115706238	XP_030489679	AT2G27510		115700007	XP_030483415	AT1G68795
				115706326	XP_030489803	AT1G17220						115701509	XP_030485184	AT1G06490		115706267	XP_030489715	AT3G46290		115700070	XP_030483488	AT2G18980
				115706369	XP_030489848	AT2G39470						115701523	XP_030485198	AT5G06470		115706329	XP_030489807	AT2G45340		115700243	XP_030483671	AT3G51880
				115706408	XP_030489913	AT3G10940						115701533	XP_030485209	AT3G02260		115706343	XP_030489821	AT4G12080		115700274	XP_030483702	AT4G03230
				115706424	XP_030489934	AT2G40100						115701544	XP_030485219	AT1G68620		115706359	XP_030489839	AT1G01950		115700282	XP_030483711	AT2G20870
				115706434	XP_030489945	AT1G01060						115701574	XP_030485253	AT2G19130		115706379	XP_030489872	AT1G53050		115700296	XP_030483726	AT5G39090
				115706439	XP_030489950	AT5G54160						115701580	XP_030485260	AT1G17980		115706386	XP_030489882	AT3G61520		115700302	XP_030483730	AT5G39240
				115706440	XP_030489951	AT5G54160						115701661	XP_030485276	AT1G19870		115706400	XP_030489900	AT5G35740		115700383	XP_030483802	AT1G74690
				115706443	XP_030489955	AT2G24395						115701871	XP_030485293	AT1G47870		115706403	XP_030489903	AT1G01490		115700389	XP_030483808	AT3G47800
				115706477	XP_030489997	AT2G45990						115702021	XP_030485345	AT5G66460		115706406	XP_030489907	AT1G01510		115700390	XP_030483809	AT1G18840
				115706481	XP_030490002	AT4G00370						115702049	XP_030485364	AT1G22150		115706419	XP_030489925	AT3G07950		115700449	XP_030483847	AT3G52390
				115706496	XP_030490017	AT5G05600						115702070	XP_030485378	AT3G09510		115706423	XP_030489930	AT4G00290		115700465	XP_030483865	AT1G28440
				115706497	XP_030490018	AT5G05600						115702189	XP_030485499	AT1G77920		115706428	XP_030489941	AT5G12040		115700488	XP_030483891	AT3G29030
				115706500	XP_030490020	AT5G02020						115702313	XP_030485618	AT5G24800		115706432	XP_030489943	AT2G05910		115700496	XP_030483899	AT3G01450
				115706508	XP_030490035	AT4G10340						115702340	XP_030485660	AT1G22540		115706451	XP_030489965	AT3G09740		115700499	XP_030483902	AT5G14700
				115706543	XP_030490082	AT3G10520						115702351	XP_030485676	AT1G71960		115706457	XP_030489971	AT4G00340		115700502	XP_030483906	AT1G15000
				115706592	XP_030490150	AT1G01820						115702364	XP_030485695	AT5G11160		115706474	XP_030489992	AT2G39970		115700504	XP_030483908	AT1G06520
				115706619	XP_030490190	AT1G12600						115702373	XP_030485701	AT2G16440		115706485	XP_030490006	AT4G00430		115700508	XP_030483915	AT1G65470
				115706627	XP_030490201	AT1G72770						115702379	XP_030485709	AT1G80450		115706499	XP_030490019	AT5G05950		115700519	XP_030483927	AT3G02110
				115706638	XP_030490209	AT2G45590						115702381	XP_030485711	AT2G14620		115706517	XP_030490048	AT3G61350		115700526	XP_030483935	AT5G39280
				115706642	XP_030490213	AT2G06025						115702393	XP_030485723	AT4G35390		115706561	XP_030490110	AT2G45010		115700529	XP_030483937	AT2G37630
				115706645	XP_030490221	AT1G08500						115702397	XP_030485726	AT4G02090		115706586	XP_030490145	AT5G51260		115700537	XP_030483956	AT4G21450
				115706666	XP_030490240	AT1G54350						115702454	XP_030485767	AT4G34215		115706598	XP_030490157	AT4G35580		115700539	XP_030483959	AT5G40780
				115706688	XP_030490264	AT1G17100						115702488	XP_030485789	AT2G19990		115706623	XP_030490195	AT2G37500		115700540	XP_030483960	AT5G40780
				115706689	XP_030490265	AT1G14345						115702487	XP_030485790	AT4G35240		115706632	XP_030490203	AT4G29720		115700551	XP_030483978	AT3G50700
				115706712	XP_030490289	AT3G14690						115702519	XP_030485812	AT1G20550		115706636	XP_030490206	AT2G45620		115700571	XP_030484011	AT4G22930
				115706721	XP_030490298	AT3G14610						115702531	XP_030485819	AT1G75980		115706647	XP_030490223	AT4G25120		115700572	XP_030484013	AT5G64140
				115706724	XP_030490305	AT1G17050						115702552	XP_030485834	AT3G22490		115706682	XP_030490256	AT3G53850		115700573	XP_030484014	AT5G64140
				115706754	XP_030490348	AT2G37170						115702579	XP_030485851	AT3G14200		115706696	XP_030490271	AT3G14570		115700578	XP_030484025	AT2G19740
				115706892	XP_030490514	AT4G25080						115702596	XP_030485868	AT2G17500		115706734	XP_030490317	AT5G11880		115700585	XP_030484037	AT4G15140
				115706963	XP_030490611	AT1G55110						115702599	XP_030485871	AT2G17530		115706735	XP_030490318	AT5G11880		115700592	XP_030484050	AT1G75150
				115706976	XP_030490626	AT5G19855						115702659	XP_030485943	AT5G66150		115706743	XP_030490335	AT4G31810		115700595	XP_030484051	AT3G59030
				115707030	XP_030490697	AT5G20490						115702662	XP_030485946	AT2G17820		115706744	XP_030490336	AT4G31810		115700606	XP_030484068	AT5G13980
				115707033	XP_030490704	AT2G38905						115702677	XP_030485967	AT2G23360		115706746	XP_030490340	AT3G52260		115700608	XP_030484074	AT2G28190
				115707077	XP_030490772	AT5G56850						115702690	XP_030485978	AT2G23360		115706767	XP_030490364	AT1G42440		115700612	XP_030484078	AT5G05130
				115707082	XP_030490783	AT4G33010						115702705	XP_030485989	AT5G67210		115706812	XP_030490412	AT4G29680		115700613	XP_030484083	AT3G56870
				115707114	XP_030490823	AT2G39130						115702712	XP_030485996	AT5G67210		115706839	XP_030490448	AT1G78700		115700632	XP_030484103	AT4G34500
				115707142	XP_030490867	AT1G54070						115702722	XP_030486011	AT2G23320		115706840	XP_030490449	AT4G29680		115700636	XP_030484107	AT5G61170
				115707158	XP_030490882	AT3G14205						115702724	XP_030486012	AT4G36890		115706874	XP_030490495	AT4G01220		115700655	XP_030484134	AT2G41290
				115707166	XP_030490892	AT5G47240						115702725	XP_030486013	AT4G36890		115706875	XP_030490496	AT1G11190		115700658	XP_030484137	AT5G15265
				115707210	XP_030490957	AT1G03055						115702728	XP_030486017	AT4G37250		115706882	XP_030490500	AT1G11200		115700676	XP_030484156	AT5G15130
				115707240	XP_030490992	AT3G10670						115702747	XP_030486038	AT4G37250		115706906	XP_030490536	AT3G62980		115700680	XP_030484160	AT5G15080
				115707252	XP_030491008	AT5G47750						115702750	XP_030486046	AT4G35270		115706911	XP_030490540	AT1G01225		115700696	XP_030484186	AT5G13930
				115707257	XP_030491014	AT1G55850						115702773	XP_030486070	AT4G35987		115706933	XP_030490572	AT1G68620		115700704	XP_030484193	AT3G01930
				115707278	XP_030491049	AT4G16390						115702784	XP_030486082	AT3G25500		115706943	XP_030490583	AT3G13772		115700720	XP_030484209	AT2G05990
				115707281	XP_030491052	AT3G54890						115702787	XP_030486085	AT2G03430		115707017	XP_030490671	AT1G55160		115700724	XP_030484214	AT5G60920
				115707282	XP_030491053	AT4G05180						115702799	XP_030486095	AT3G25500		115707045	XP_030490727	AT3G61540		115700727	XP_030484218	AT5G19440
				115707286	XP_030491058	AT4G16410						115702806	XP_030486103	AT5G42420		115707050	XP_030490730	AT4G35580		115700730	XP_030484222	AT5G20090
				115707288	XP_030491060	AT5G41761						115702836	XP_030486132	AT1G76490		115707052	XP_030490736	AT3G14000		115700736	XP_030484229	AT1G22380
				115707294	XP_030491064	AT3G24503						115702847	XP_030486146	AT4G35350		115707061	XP_030490752	AT3G49940		115700742	XP_030484234	AT3G01510
				115707338	XP_030491128	AT2G38905						115702848	XP_030486147	AT4G35350		115707078	XP_030490776	AT2G19530		115700713	XP_030484239	AT1G76160
				115707365	XP_030491168	AT5G55350						115702851	XP_030486151	AT4G35350		115707115	XP_030490825	AT1G72500		115700746	XP_030484240	AT2G20820
				115707366	XP_030491169	AT5G55340						115702858	XP_030486165	AT4G35300		115707119	XP_030490835	AT2G39710		115700752	XP_030484253	AT1G57860
				115707367	XP_030491171	AT5G55340						115702904	XP_030486225	AT5G05320		115707121	XP_030490839	AT1G01200		115700766	XP_030484266	AT1G18800
				115707404	XP_030491221	AT4G22190						115702910	XP_030486234	AT3G19130		115707161	XP_030490887	AT5G40990		115700782	XP_030484283	AT2G33845
				115707411	XP_030491228	AT4G04020						115702916	XP_030486242	AT1G49670		115707162	XP_030490888	AT5G40990		115700791	XP_030484298	AT1G26945
				115707417	XP_030491235	AT1G11340						115702940	XP_030486271	AT3G26090		115707174	XP_030490909	AT3G14240		115700792	XP_030484299	AT3G07820
				115707434	XP_030491258	AT2G26650						115702947	XP_030486279	AT4G34050		115707179	XP_030490912	AT1G72340		115700796	XP_030484309	AT3G22250
				115707439	XP_030491261	AT4G16740						115702978	XP_030486312	AT4G34131		115707205	XP_030490950	AT3G14360		115700811	XP_030484325	AT5G22220
				115707452	XP_030491277	AT3G24430						115702980	XP_030486314	AT4G34131		115707211	XP_030490954	AT3G14350		115700813	XP_030484332	AT4G15210
				115707473	XP_030491310	AT4G23180						115702982	XP_030486316	AT4G06744		115707220	XP_030490964	AT2G36530		115700826	XP_030484347	AT1G53160
				115707498	XP_030491350	AT3G16250						115702983	XP_030486317	AT1G49820		115707248	XP_030491003	AT4G01037		115700827	XP_030484349	AT3G02310
				115707549	XP_030491417	AT5G56550						115702986	XP_030486319	AT3G19450		115707262	XP_030491034	AT5G11780		115700828	XP_030484352	AT3G02310
				115707565	XP_030491438	AT4G26270						115702995	XP_030486329	AT2G15220		115707271	XP_030491045	AT5G11790		115700839	XP_030484364	AT5G56740
				115707582	XP_030491454	AT2G19230						115703012	XP_030486346	AT3G19450		115707328	XP_030491118	AT2G35760		115700841	XP_030484366	AT1G25510
				115707598	XP_030491470	AT1G75350						115703014	XP_030486349	AT1G49820		115707356	XP_030491148	AT4G22360		115700851	XP_030484376	AT1G61260
				115707603	XP_030491475	AT2G06520						115703023	XP_030486363	AT1G80730		115707397	XP_030491216	AT1G05010		115700854	XP_030484379	AT4G39250
				115707628	XP_030491505	AT3G54420						115703031	XP_030486374	AT1G80730		115707400	XP_030491218	AT1G12000		115700857	XP_030484381	AT4G19640
				115707644	XP_030491524	AT5G51110						115703052	XP_030486403	AT2G23090		115707423	XP_030491242	AT2G30410		115700884	XP_030484408	AT2G32380
				115707657	XP_030491542	AT1G19150						115703054	XP_030486405	AT4G33910		115707428	XP_030491250	AT1G11440		115700881	XP_030484409	AT1G75240
				115707674	XP_030491561	AT4G21440						115703073	XP_030486418	AT3G19540		115707432	XP_030491254	AT1G55890		115700887	XP_030484412	AT4G25330
				115707678	XP_030491570	AT4G22240						115703099	XP_030486448	AT1G10200		115707447	XP_030491271	AT1G11530		115700907	XP_030484436	AT5G23260
				115707682	XP_030491574	AT2G24820						115703106	XP_030486463	AT1G10200		115707484	XP_030491323	AT4G21705		115700909	XP_030484439	AT3G15660
				115707689	XP_030491577	AT3G10970						115703127	XP_030486489	AT3G23590		115707493	XP_030491342	AT4G20060		115700917	XP_030484451	AT3G63170
				115707691	XP_030491579	AT5G03555						115703138	XP_030486499	AT2G48100		115707526	XP_030491388	AT1G79750		115700898	XP_030484461	AT2G41990
				115707698	XP_030491586	AT4G04330						115703142	XP_030486500	AT1G10200		115707550	XP_030491418	AT1G31220		115700925	XP_030484463	AT2G30620
				115707707	XP_030491597	AT4G04350						115703143	XP_030486502	AT3G23590		115707567	XP_030491440	AT5G50340		115700935	XP_030484475	AT3G18990
				115707718	XP_030491609	AT5G40990						115703144	XP_030486503	AT4G32940		115707593	XP_030491467	AT3G56200		115700939	XP_030484478	AT2G03430
				115707725	XP_030491616	AT1G62300						115703172	XP_030486546	AT5G66600		115707606	XP_030491478	AT5G47710		115700940	XP_030484479	AT3G12600
				115707728	XP_030491624	AT4G31780						115703187	XP_030486568	AT1G47271		115707617	XP_030491490	AT1G17665		115700941	XP_030484480	AT1G69850
				115707738	XP_030491635	AT1G11860						115703199	XP_030486577	AT1G49470		115707618	XP_030491491	AT1G73020		115700943	XP_030484482	AT5G15350
				115707740	XP_030491639	AT3G25805						115703212	XP_030486590	AT1G54790		115707679	XP_030491571	AT1G12000		115700950	XP_030484489	AT4G18160
				115707741	XP_030491641	AT1G62250						115703220	XP_030486594	AT3G19000		115707696	XP_030491584	AT4G22130		115700956	XP_030484495	AT5G14070
				115707772	XP_030491688	AT3G14690						115703243	XP_030486621	AT2G15790		115707700	XP_030491590	AT5G52630		115700966	XP_030484508	AT1G67265
				115707753	XP_030491705	AT1G02560						115703284	XP_030486634	AT3G63110		115707715	XP_030491606	AT4G13870		115700968	XP_030484510	AT1G12845
				115707802	XP_030491732	AT5G28237						115703311	XP_030486635	AT4G35160		115707733	XP_030491628	AT4G04470		115700969	XP_030484511	AT3G30580
				115707822	XP_030491759	AT3G27750						115703544	XP_030486646	AT1G03190		115707747	XP_030491651	AT1G11800		115700978	XP_030484517	AT3G07680
				115707843	XP_030491785	AT1G52230						115703500	XP_030486647	AT3G07570		115707762	XP_030491677	AT4G04720		115700991	XP_030484531	AT3G25780
				115707860	XP_030491807	AT2G17240						115703559	XP_030486651	AT5G46600		115707787	XP_030491715	AT1G61870		115701003	XP_030484546	AT3G57990
				115707875	XP_030491827	AT1G52510						115703588	XP_030486674	AT1G79760		115707789	XP_030491717	AT1G61850		115701016	XP_030484559	AT1G16080
				115707876	XP_030491828	AT1G15290						115703600	XP_030486690	AT3G11430		115707804	XP_030491734	AT2G36530		115701023	XP_030484567	AT2G20875
				115707886	XP_030491838	AT1G15740						115703608	XP_030486705	AT5G05840		115707807	XP_030491737	AT3G11320		115701033	XP_030484577	AT5G39080
				115707927	XP_030491891	AT1G15980						115703614	XP_030486710	AT2G40200		115707809	XP_030491742	AT3G11945		115701047	XP_030484596	AT2G42580
				115707938	XP_030491904	AT1G73060						115703621	XP_030486717	AT5G19600		115707827	XP_030491766	AT1G79820		115701069	XP_030484625	AT5G66440
				115707942	XP_030491913	AT3G53920						115703623	XP_030486720	AT5G53390		115707832	XP_030491774	AT1G79860		115701093	XP_030484647	AT4G32480
				115707945	XP_030491922	AT4G33470						115703762	XP_030486856	AT3G54450		115707833	XP_030491775	AT4G32720		115701122	XP_030484680	AT2G42200
				115707951	XP_030491927	AT1G80920						115703797	XP_030486890	AT5G19600		115707847	XP_030491789	AT3G16110		115701144	XP_030484710	AT5G15800
				115707975	XP_030491959	AT5G05740						115703825	XP_030486918	AT1G02570		115707872	XP_030491819	AT1G52530		115701150	XP_030484717	AT3G29090
				115707994	XP_030491995	AT5G23120						115703829	XP_030486920	AT2G40815		115707881	XP_030491832	AT1G15710		115701151	XP_030484718	AT3G11520
				115708024	XP_030492045	AT3G54420						115703857	XP_030486947	AT4G23160		115707893	XP_030491850	AT4G34419		115701164	XP_030484733	AT2G42870
				115708026	XP_030492050	AT1G77670						115703864	XP_030486957	AT4G34370		115707907	XP_030491861	AT1G15870		115701166	XP_030484736	AT2G42860
				115708041	XP_030492067	AT3G59760						115703902	XP_030487000	AT3G63210		115707925	XP_030491888	AT5G57970		115701168	XP_030484740	AT5G60860
				115708047	XP_030492077	AT3G59780						115703921	XP_030487015	AT2G34930		115707933	XP_030491899	AT1G49320		115701194	XP_030484776	AT4G31460
				115708077	XP_030492114	AT5G05740						115703936	XP_030487027	AT2G17040		115707941	XP_030491912	AT1G80870		115701195	XP_030484777	AT5G50400
				115708099	XP_030492146	AT5G51100						115703995	XP_030487081	AT3G63250		115707991	XP_030491992	AT1G77460		115701200	XP_030484782	AT1G26355
				115708105	XP_030492155	AT2G39730						115704016	XP_030487097	AT3G16300		115707998	XP_030492004	AT1G77470		115701201	XP_030484784	AT1G11125
				115708126	XP_030492185	AT4G00870						115704030	XP_030487115	AT1G03080		115708028	XP_030492051	AT1G05710		115701203	XP_030484789	AT1G65560
				115708157	XP_030492227	AT3G14610						115704045	XP_030487126	AT4G35580		115708061	XP_030492093	AT5G16990		115701222	XP_030484817	AT3G25640
				115708163	XP_030492233	AT3G57520						115704049	XP_030487131	AT3G02550		115708071	XP_030492108	AT1G05620		115701221	XP_030484818	AT1G35180
				115708183	XP_030492251	AT3G12685						115704050	XP_030487132	AT4G01550		115708084	XP_030492121	AT4G05120		115701230	XP_030484834	AT1G57860
				115708199	XP_030492269	AT5G20220						115704090	XP_030487169	AT5G25930		115708087	XP_030492133	AT4G21320		115701233	XP_030484836	AT5G50890
				115708175	XP_030492279	AT4G01995						115704102	XP_030487181	AT5G19970		115708095	XP_030492142	AT1G47830		115701253	XP_030484864	AT1G75430
				115708221	XP_030492298	AT5G04220						115704150	XP_030487227	AT5G54160		115708101	XP_030492149	AT1G53460		115701266	XP_030484875	AT3G01015
				115708234	XP_030492312	AT3G51420						115704166	XP_030487243	AT1G58440		115708113	XP_030492169	AT3G61620		115701273	XP_030484887	AT4G36360
				115708263	XP_030492346	AT5G54160						115704192	XP_030487267	AT1G17860		115708141	XP_030492203	AT2G29670		115701287	XP_030484897	AT5G47920
				115708266	XP_030492349	AT2G45600						115704199	XP_030487275	AT5G11590		115708217	XP_030492293	AT4G21890		115701299	XP_030484911	AT2G32590
				115708267	XP_030492355	AT5G16970						115704205	XP_030487282	AT1G22380		115708228	XP_030492307	AT3G55550		115701321	XP_030484939	AT2G04570
				115708274	XP_030492361	AT1G72640						115704207	XP_030487286	AT1G09970		115708229	XP_030492311	AT2G33710		115701323	XP_030484941	AT5G14450
				115708275	XP_030492362	AT5G57040						115704295	XP_030487368	AT3G57230		115708271	XP_030492356	AT2G40110		115701325	XP_030484944	AT3G22104
				115708281	XP_030492369	AT2G46100						115704329	XP_030487401	AT4G21780		115708293	XP_030492383	AT1G50180		115701328	XP_030484949	AT5G55090
				115708295	XP_030492384	AT1G19130						115704343	XP_030487413	AT4G33550		115708296	XP_030492385	AT3G14080		115701364	XP_030485003	AT5G14230
				115708321	XP_030492418	AT3G55580						115704384	XP_030487455	AT2G21180		115708312	XP_030492405	AT5G53880		115701367	XP_030485006	AT3G01800
				115708324	XP_030492425	ATCG00120						115704419	XP_030487485	AT3G46530		115708340	XP_030492442	AT3G57120		115701371	XP_030485012	AT3G11890
				115708326	XP_030492427	AT1G79510						115704436	XP_030487503	AT5G56890		115708654	XP_030492498	AT4G29720		115701378	XP_030485019	AT3G07800
				115708334	XP_030492437	AT2G46735						115704439	XP_030487507	AT4G25420		115708658	XP_030492501	AT2G30410		115701386	XP_030485031	AT4G30220
				115708335	XP_030492438	AT4G22990						115704503	XP_030487568	AT1G17010		115708660	XP_030492504	AT4G40042		115701393	XP_030485042	AT1G75520
				115708342	XP_030492444	AT5G10690						115704535	XP_030487596	AT1G53350		115708718	XP_030492577	AT5G45480		115701397	XP_030485044	AT5G15230
				115708655	XP_030492497	AT5G13730						115704542	XP_030487604	AT3G07040		115708724	XP_030492582	AT3G14470		115701410	XP_030485058	AT3G01140
				115708663	XP_030492507	AT1G18870						115704555	XP_030487617	AT1G72300		115708761	XP_030492634	AT1G67570		115701418	XP_030485067	AT1G70830
				115708695	XP_030492547	AT1G34000						115704571	XP_030487634	AT4G05200		115708803	XP_030492677	AT5G35520		115701423	XP_030485079	AT1G65730
				115708706	XP_030492559	AT1G73210						115704601	XP_030487661	AT1G11300		115708810	XP_030492686	AT3G48210		115701428	XP_030485089	AT3G02130
				115708720	XP_030492579	AT3G45290						115704610	XP_030487672	AT4G06744		115708823	XP_030492700	AT3G09660		115701432	XP_030485092	AT3G48200
				115708726	XP_030492585	AT1G49010						115704625	XP_030487687	AT1G61820		115708872	XP_030492747	AT2G37195		115701442	XP_030485104	AT1G22400
				115708727	XP_030492587	AT5G13410						115704641	XP_030487703	AT1G75990		115708881	XP_030492756	AT2G41760		115701448	XP_030485109	AT3G54750
				115708738	XP_030492602	AT3G53470						115704648	XP_030487709	AT4G33550		115708888	XP_030492761	AT1G56170		115701449	XP_030485112	AT5G41070
				115708741	XP_030492605	AT2G42760						115704652	XP_030487712	AT3G54420		115708919	XP_030492808	AT1G43170		115701467	XP_030485134	AT2G28720
				115708766	XP_030492638	AT5G62840						115704666	XP_030487729	AT2G38750		115708936	XP_030492825	AT5G64740		115701469	XP_030485141	AT3G45980
				115708770	XP_030492643	AT5G47740						115704682	XP_030487740	AT2G45400		115708948	XP_030492835	AT3G48310		115701471	XP_030485144	AT1G16060
				115708790	XP_030492660	AT3G53170						115704683	XP_030487745	AT2G17840		115708999	XP_030492879	AT5G25480		115701486	XP_030485159	AT3G59840
				115708836	XP_030492716	AT5G13650						115704689	XP_030487749	AT3G30340		115709010	XP_030492890	AT2G36460		115701492	XP_030485164	AT1G27930
				115708897	XP_030492780	AT2G05310						115704692	XP_030487756	AT5G09220		115709056	XP_030492944	AT2G36970		115701496	XP_030485168	AT2G27960
				115708909	XP_030492794	AT4G20360						115704712	XP_030487771	AT5G56840		115709114	XP_030493008	AT3G10050		115701493	XP_030485169	AT1G19900
				115708914	XP_030492801	AT5G02750						115704713	XP_030487773	AT1G80450		115709116	XP_030493010	AT3G08500		115701500	XP_030485173	AT1G06570
				115708924	XP_030492810	AT3G14470						115704723	XP_030487788	AT2G34930		115709178	XP_030493082	AT2G28100		115701501	XP_030485174	AT3G02330
				115708949	XP_030492837	AT3G52970						115704733	XP_030487801	AT1G78520		115709179	XP_030493083	AT2G28100		115701510	XP_030485185	AT3G02040
				115708954	XP_030492841	AT1G74080						115704748	XP_030487812	AT4G21200		115709180	XP_030493085	AT2G28100		115701513	XP_030485190	AT1G75620
				115708987	XP_030492866	AT2G36970						115704752	XP_030487815	AT3G59680		115709181	XP_030493086	AT1G78750		115701517	XP_030485194	AT2G16030
				115709008	XP_030492888	AT3G49180						115704757	XP_030487822	AT1G02170		115709225	XP_030493135	AT1G48480		115701521	XP_030485201	AT5G10980
				115709028	XP_030492921	AT5G60970						115704760	XP_030487827	AT5G04220		115709249	XP_030493163	AT2G13600		115701529	XP_030485204	AT2G37630
				115709041	XP_030492930	AT2G36970						115704768	XP_030487833	AT4G29080		115709253	XP_030493168	AT4G31070		115701530	XP_030485205	AT2G05760
				115709045	XP_030492934	AT1G74470						115704769	XP_030487834	AT1G15260		115709262	XP_030493181	AT5G42810		115701537	XP_030485214	AT1G69560
				115709101	XP_030492996	AT1G51220						115704783	XP_030487851	AT4G34131		115709279	XP_030493203	AT2G36530		115701538	XP_030485215	AT3G18440
				115709185	XP_030493096	AT1G65480						115704794	XP_030487862	AT4G00430		115709285	XP_030493214	AT2G36290		115701548	XP_030485224	AT5G22300
				115709251	XP_030493165	AT4G19170						115704764	XP_030487865	AT1G02640		115709286	XP_030493215	AT2G36570		115701550	XP_030485226	AT2G36080
				115709261	XP_030493180	AT4G31040						115704798	XP_030487866	AT3G54450		115709294	XP_030493227	AT4G24620		115701553	XP_030485230	AT3G51680
				115709267	XP_030493186	AT3G55800						115704811	XP_030487877	AT2G33510		115709305	XP_030493240	AT1G74380		115701570	XP_030485249	AT3G01790
				115709276	XP_030493199	AT4G10300						115704810	XP_030487881	AT5G53300		115709325	XP_030493264	AT2G03220		115701581	XP_030485262	AT3G42860
				115709299	XP_030493232	AT1G48450						115704818	XP_030487884	AT1G16290		115709341	XP_030493287	AT5G04020		115701582	XP_030485263	AT4G16360
				115709358	XP_030493308	AT1G43670						115704826	XP_030487892	AT2G39435		115709350	XP_030493296	AT3G18524		115701584	XP_030485267	AT1G12740
				115709361	XP_030493309	AT3G47470						115704868	XP_030487936	AT1G33020		115709354	XP_030493300	AT3G48160		115701761	XP_030485284	AT1G75580
				115709363	XP_030493311	AT2G36990						115704870	XP_030487939	AT4G12560		115709373	XP_030493320	AT3G12620		115701892	XP_030485294	AT1G75710
				115709365	XP_030493312	AT3G09520						115704877	XP_030487947	AT3G11150		115709404	XP_030493361	AT1G74030		115702002	XP_030485328	AT1G22170
				115709371	XP_030493317	AT5G62790						115704884	XP_030487956	AT4G10400		115709467	XP_030493441	AT2G01710		115702010	XP_030485335	AT4G08685
				115709413	XP_030493372	AT3G01930						115704905	XP_030487987	AT2G20080		115709569	XP_030493560	AT3G17940		115702031	XP_030485353	AT1G78020
				115709427	XP_030493393	AT1G76890						115704907	XP_030487988	AT2G19480		115709607	XP_030493603	AT2G36490		115702037	XP_030485359	AT1G36160
				115709455	XP_030493426	AT1G45616						115704916	XP_030487996	AT4G23340		115709646	XP_030493667	AT1G24450		115702238	XP_030485552	AT1G12350
				115709518	XP_030493494	AT5G51690						115704921	XP_030488003	AT5G07360		115709664	XP_030493683	AT1G74920		115702253	XP_030485566	AT2G26640
				115709531	XP_030493513	AT5G63420						115704943	XP_030488020	AT1G52155		115709674	XP_030493697	AT2G41770		115702309	XP_030485614	AT5G25610
				115709544	XP_030493532	AT1G71810						115704968	XP_030488048	AT2G41610		115709690	XP_030493716	AT3G09780		115702315	XP_030485621	AT1G44760
				115709567	XP_030493558	AT3G18000						115704978	XP_030488056	AT4G29330		115709694	XP_030493722	AT5G62940		115702319	XP_030485625	AT1G21830
				115709575	XP_030493568	AT3G17930						115704983	XP_030488064	AT4G29230		115709696	XP_030493724	AT1G75980		115702323	XP_030485628	AT1G77580
				115709577	XP_030493571	AT3G18200						115704999	XP_030488087	AT2G34930		115709697	XP_030493725	AT3G06040		115702321	XP_030485631	AT5G42900
				115709630	XP_030493634	AT1G23870						115705000	XP_030488088	AT4G29210		115709721	XP_030493759	AT5G50120		115702334	XP_030485652	AT1G72170
				115709644	XP_030493665	AT5G50100						115705003	XP_030488093	AT4G31880		115709745	XP_030493793	AT3G07690		115702336	XP_030485657	AT3G12500
				115709683	XP_030493710	AT3G09650						115705031	XP_030488125	AT4G13870		115709781	XP_030493849	AT4G39280		115702367	XP_030485697	AT2G45180
				115709698	XP_030493729	AT4G09650						115705033	XP_030488127	AT2G40480		115709821	XP_030493914	AT5G14420		115702385	XP_030485716	AT5G36910
				115709712	XP_030493743	AT3G48200						115705039	XP_030488138	AT5G03680		115709859	XP_030493951	AT3G53380		115702390	XP_030485720	AT2G19990
				115709756	XP_030493816	AT5G23060						115705049	XP_030488149	AT1G79750		115709870	XP_030493969	AT4G24960		115702417	XP_030485742	AT3G62690
				115709778	XP_030493845	AT5G13800						115705061	XP_030488161	AT4G17500		115709894	XP_030494002	AT2G41760		115702423	XP_030485745	AT4G33800
				115709788	XP_030493859	AT3G63490						115705071	XP_030488170	AT5G47220		115709905	XP_030494021	AT1G22540		115702438	XP_030485755	AT3G13540
				115709801	XP_030493880	AT2G37240						115705108	XP_030488209	AT5G02700		115709928	XP_030494054	AT5G03760		115702434	XP_030485756	AT1G50000
				115709808	XP_030493893	AT1G74850						115705115	XP_030488215	AT2G20010		115709940	XP_030494065	AT1G74690		115702442	XP_030485759	AT4G33800
				115709812	XP_030493897	AT3G14470						115705133	XP_030488232	AT1G77550		115709946	XP_030494077	AT2G47510		115702452	XP_030485765	AT5G47390
				115709811	XP_030493900	AT3G47180						115705143	XP_030488247	AT3G62990		115709952	XP_030494087	AT5G50310		115702465	XP_030485773	AT2G17080
				115709818	XP_030493909	AT5G12470						115705158	XP_030488260	AT3G24460		115709995	XP_030494143	AT2G37170		115702429	XP_030485775	AT2G17620
				115709846	XP_030493944	AT3G09580						115705197	XP_030488314	AT1G79270		115710009	XP_030494160	AT2G41890		115702478	XP_030485781	AT1G48330
				115709866	XP_030493959	AT3G08010						115705209	XP_030488333	AT2G38970		115710087	XP_030494272	AT2G15490		115702506	XP_030485803	AT4G25950
				115709882	XP_030493986	AT5G13630						115705212	XP_030488334	AT5G13640		115710106	XP_030494300	AT3G10290		115702538	XP_030485827	AT2G17120
				115709910	XP_030494025	AT5G61410						115705218	XP_030488348	AT2G47750		115710107	XP_030494301	AT2G41530		115702591	XP_030485863	AT2G17650
				115709943	XP_030494071	AT3G10230						115705232	XP_030488361	AT4G29540		115710120	XP_030494317	AT5G04000		115702614	XP_030485895	AT2G17570
				115709967	XP_030494111	AT2G44760						115705234	XP_030488364	AT5G06600		115710131	XP_030494330	AT2G41530		115702619	XP_030485901	AT2G17620
				115709971	XP_030494113	AT5G13630						115705241	XP_030488381	AT1G15520		115710153	XP_030494349	AT4G16340		115702625	XP_030485909	AT4G38370
				115710033	XP_030494196	AT3G18890						115705260	XP_030488401	AT5G25590		115710159	XP_030494354	AT1G58390		115702633	XP_030485914	AT1G14140
				115710240	XP_030494452	AT4G37200						115705267	XP_030488410	AT3G15990		115710173	XP_030494375	AT3G48140		115702640	XP_030485919	AT4G35730
				115710289	XP_030494511	AT5G61440						115705268	XP_030488411	AT1G80280		115710199	XP_030494407	AT5G13180		115702641	XP_030485920	AT4G35690
				115710290	XP_030494512	AT3G57330						115705302	XP_030488466	AT3G25910		115710202	XP_030494412	AT2G44830		115702647	XP_030485930	AT1G76310
				115710301	XP_030494529	AT4G03520						115705304	XP_030488468	AT1G08510		115710222	XP_030494428	AT3G14470		115702656	XP_030485936	AT1G11000
				115710316	XP_030494545	AT2G28260						115705307	XP_030488474	AT5G25530		115710256	XP_030494470	AT2G02800		115702666	XP_030485950	AT3G51280
				115710285	XP_030494546	AT4G01935						115705312	XP_030488480	AT1G52760		115710284	XP_030494504	AT3G47830		115702670	XP_030485956	AT3G51290
				115710405	XP_030494629	AT5G60900						115705364	XP_030488554	AT4G37810		115710306	XP_030494533	AT5G62710		115702726	XP_030486014	AT4G36880
				115710389	XP_030494633	AT4G01940						115705371	XP_030488556	AT2G28760		115710329	XP_030494558	AT1G16520		115702733	XP_030486023	AT5G67270
				115710423	XP_030494647	AT5G02750						115705373	XP_030488559	AT3G24503		115710355	XP_030494585	AT3G48770		115702734	XP_030486025	AT5G67270
				115710629	XP_030494847	AT1G77090						115705392	XP_030488586	AT5G22060		115710396	XP_030494622	AT3G18960		115702709	XP_030486031	AT3G51240
				115710643	XP_030494860	AT2G36770						115705408	XP_030488604	AT4G32810		115710492	XP_030494715	AT5G06940		115702746	XP_030486037	AT2G38290
				115710913	XP_030495127	AT1G32450						115705423	XP_030488617	AT1G19230		115710531	XP_030494753	AT4G35020		115702758	XP_030486053	AT4G37370
				115710932	XP_030495145	AT4G19100						115705429	XP_030488622	AT2G40320		115710606	XP_030494823	AT5G23690		115702761	XP_030486054	AT4G37370
				115711136	XP_030495331	AT3G57190						115705436	XP_030488632	AT2G40120		115710609	XP_030494828	AT1G21460		115702764	XP_030486059	AT4G37370
				115711183	XP_030495370	AT1G68520						115705448	XP_030488648	AT5G11590		115710648	XP_030494867	AT5G47070		115702765	XP_030486060	AT4G37370
				115711241	XP_030495433	AT3G17860						115705484	XP_030488684	AT5G61480		115710748	XP_030494962	AT3G53190		115702768	XP_030486065	AT5G65360
				115711256	XP_030495454	AT1G74730						115705498	XP_030488703	AT4G32790		115710828	XP_030495042	AT1G20370		115702769	XP_030486066	AT5G65360
				115711302	XP_030495499	AT2G36630						115705501	XP_030488704	AT5G61480		115710978	XP_030495190	AT5G06940		115702775	XP_030486071	AT4G38660
				115711322	XP_030495520	AT3G63540						115705503	XP_030488706	AT5G20870		115711100	XP_030495298	AT3G14470		115702776	XP_030486073	AT4G36010
				115711340	XP_030495537	AT4G12690						115705522	XP_030488726	AT1G12380		115711142	XP_030495337	AT1G20430		115702778	XP_030486078	AT1G54690
				115711360	XP_030495556	ATCG01000						115705530	XP_030488744	AT3G11280		115711182	XP_030495373	AT5G67260		115702783	XP_030486081	AT5G48370
				115711366	XP_030495560	AT3G02555						115705534	XP_030488747	AT5G13530		115711187	XP_030495375	AT3G17840		115702793	XP_030486088	AT4G38660
				115711388	XP_030495579	AT4G09350						115705536	XP_030488749	AT4G01070		115711204	XP_030495389	AT5G50375		115702797	XP_030486096	AT1G02970
				115711410	XP_030495603	AT5G62720						115705567	XP_030488793	AT2G46495		115711228	XP_030495416	AT5G18475		115702801	XP_030486097	AT5G48370
				115711414	XP_030495609	AT5G03800						115705568	XP_030488795	AT2G28760		115711255	XP_030495452	AT2G37060		115702825	XP_030486122	AT4G38160
				115711438	XP_030495640	AT1G06110						115705571	XP_030488799	AT5G05365		115711259	XP_030495459	AT4G24620		115702831	XP_030486128	AT4G38160
				115711459	XP_030495661	AT5G50530						115705595	XP_030488829	AT2G45300		115711311	XP_030495507	AT2G41860		115702845	XP_030486143	AT3G53740
				115711480	XP_030495679	AT5G52970						115705599	XP_030488833	AT2G45300		115711343	XP_030495540	AT2G36880		115702866	XP_030486175	AT2G17230
				115711484	XP_030495683	AT1G56050						115705610	XP_030488855	AT4G00080		115711375	XP_030495569	AT2G15490		115702878	XP_030486189	AT2G16980
				115711506	XP_030495711	AT5G12130						115705620	XP_030488868	AT2G46630		115711379	XP_030495572	AT4G12080		115702891	XP_030486204	AT2G16980
				115711518	XP_030495731	AT3G53530						115705625	XP_030488879	AT4G00060		115711391	XP_030495582	AT2G41710		115702899	XP_030486213	AT2G27090
				115711558	XP_030495772	AT2G37100						115705630	XP_030488886	AT5G26010		115711398	XP_030495589	AT5G35400		115702915	XP_030486241	AT4G36880
				115711560	XP_030495777	AT5G37660						115705643	XP_030488904	AT3G55560		115711397	XP_030495592	AT1G19360		115702938	XP_030486273	AT2G48020
				115711565	XP_030495779	AT3G57190						115705647	XP_030488908	AT5G61820		115711411	XP_030495605	AT1G74520		115702948	XP_030486281	AT2G09990
				115711594	XP_030495820	AT4G24700						115705664	XP_030488924	AT1G43800		115711418	XP_030495611	AT2G34470		115702964	XP_030486300	AT4G34160
				115711601	XP_030495826	AT3G48420						115705685	XP_030488943	AT4G35920		115711437	XP_030495637	AT5G62960		115702967	XP_030486302	AT2G15430
				115711609	XP_030495844	AT1G76570						115705702	XP_030488971	AT1G43790		115711476	XP_030495676	AT1G70370		115702974	XP_030486309	AT3G19320
				115711613	XP_030495845	AT5G02830						115705716	XP_030488990	AT2G39980		115711495	XP_030495699	AT5G58890		115702990	XP_030486322	AT4G34215
				115711631	XP_030495868	AT4G24670						115705728	XP_030489004	AT1G17230		115711530	XP_030495742	AT3G48425		115702994	XP_030486328	AT2G15220
				115711648	XP_030495880	AT1G68520						115705740	XP_030489021	AT3G48860		115711531	XP_030495743	AT3G12650		115703018	XP_030486356	AT4G34260
				115711657	XP_030495889	AT2G36750						115705753	XP_030489040	AT3G54250		115711635	XP_030495871	AT2G36890		115703025	XP_030486367	AT2G39540
				115711764	XP_030495964	AT1G76450						115705755	XP_030489043	AT3G54260		115711655	XP_030495887	AT5G54860		115703027	XP_030486370	AT4G34260
				115711954	XP_030496012	AT5G43260						115705770	XP_030489068	AT5G04740		115711668	XP_030495902	AT3G18190		115703034	XP_030486378	AT4G24220
				115711956	XP_030496016	AT2G43060						115705787	XP_030489088	AT1G17180		115711674	XP_030495907	AT3G18550		115703039	XP_030486382	AT2G14820
				115711967	XP_030496026	AT2G23670						115705817	XP_030489117	AT2G19910		115711678	XP_030495910	AT4G38495		115703050	XP_030486402	AT5G21090
				115711988	XP_030496050	AT3G26300						115705819	XP_030489121	AT5G05460		115711681	XP_030495919	AT1G74380		115703053	XP_030486404	AT1G49870
				115712001	XP_030496059	AT4G39710						115705822	XP_030489126	AT3G56680		115711693	XP_030495935	AT1G24360		115703076	XP_030486423	AT2G14820
				115712007	XP_030496069	AT2G17972						115705831	XP_030489137	AT3G60740		115711696	XP_030495937	AT5G62580		115703090	XP_030486438	AT3G06260
				115712031	XP_030496096	AT1G70760						115705835	XP_030489139	AT4G29310		115711703	XP_030495946	AT1G48175		115703115	XP_030486476	AT4G02330
				115712060	XP_030496138	AT1G60010						115705838	XP_030489143	AT2G46370		115711709	XP_030495959	AT1G76500		115703128	XP_030486486	AT4G02370
				115712061	XP_030496139	AT5G17870						115705847	XP_030489153	AT2G46860		115711780	XP_030495965	AT2G33620		115703130	XP_030486490	AT2G26520
				115712067	XP_030496144	AT1G22380						115705855	XP_030489161	AT5G59300		115711921	XP_030495976	AT5G66960		115703137	XP_030486495	AT3G19210
				115712086	XP_030496176	AT1G70810						115705860	XP_030489165	AT3G28345		115711924	XP_030495979	AT3G50860		115703148	XP_030486508	AT1G49740
				115712095	XP_030496187	AT4G37370						115705859	XP_030489168	AT4G37720		115711934	XP_030495990	AT1G49170		115703155	XP_030486523	AT5G01910
				115712101	XP_030496192	AT1G13710						115705864	XP_030489170	AT3G54390		115711945	XP_030496001	AT1G65810		115703164	XP_030486530	AT3G42170
				115712109	XP_030496204	AT1G71090						115705873	XP_030489180	AT2G19570		115711951	XP_030496010	AT3G01860		115703170	XP_030486545	AT3G47360
				115712119	XP_030496214	AT5G64940						115705875	XP_030489182	AT2G38120		115711982	XP_030496045	AT5G11070		115703176	XP_030486556	AT3G19300
				115712125	XP_030496219	AT5G66450						115705879	XP_030489186	AT5G35460		115712000	XP_030496062	AT1G24160		115703179	XP_030486558	AT1G49430
				115712139	XP_030496242	AT1G22360						115705890	XP_030489206	AT2G39510		115712036	XP_030496103	AT2G16250		115703181	XP_030486562	AT3G50830
				115712179	XP_030496287	AT1G70410						115705891	XP_030489207	AT2G39510		115712049	XP_030496117	AT5G66980		115703182	XP_030486563	AT5G42650
				115712235	XP_030496358	AT5G65740						115705892	XP_030489208	AT2G39510		115712050	XP_030496130	AT2G44380		115703183	XP_030486565	AT2G03550
				115712241	XP_030496364	AT3G62190						115705894	XP_030489209	AT1G13740		115712063	XP_030496141	AT1G24100		115703186	XP_030486567	AT5G42650
				115712250	XP_030496367	AT3G50820						115705895	XP_030489210	AT1G74310		115712094	XP_030496189	AT5G24910		115703191	XP_030486571	AT3G18950
				115712254	XP_030496369	AT1G24530						115705896	XP_030489212	AT5G24090		115712106	XP_030496202	AT3G07880		115703201	XP_030486578	AT5G26690
				115712251	XP_030496370	AT3G22150						115705900	XP_030489217	AT2G39920		115712112	XP_030496212	AT5G47820		115703208	XP_030486583	AT1G44970
				115712262	XP_030496379	AT1G16730						115705905	XP_030489228	AT4G01130		115712132	XP_030496233	AT3G56810		115703222	XP_030486595	AT3G19050
				115712273	XP_030496391	AT1G22740						115705912	XP_030489240	AT2G39580		115712135	XP_030496238	AT3G43810		115703246	XP_030486624	AT1G22690
				115712299	XP_030496421	AT1G22360						115705916	XP_030489251	AT5G53900		115712146	XP_030496248	AT2G01340		115703436	XP_030486640	AT4G08850
				115712372	XP_030496499	AT4G28720						115705921	XP_030489256	AT5G53900		115712199	XP_030496349	AT3G17430		115703570	XP_030486658	AT4G29430
				115712401	XP_030496530	AT2G01755						115705923	XP_030489258	AT5G58300		115712266	XP_030496382	AT3G17730		115703584	XP_030486670	AT5G45130
				115712469	XP_030496607	AT5G67370						115705925	XP_030489261	AT3G03050		115712296	XP_030496417	AT5G66440		115703590	XP_030486679	AT4G09820
				115712470	XP_030496611	AT1G22750						115705928	XP_030489265	AT5G06120		115712304	XP_030496427	AT5G46050		115703615	XP_030486712	AT4G24350
				115712478	XP_030496617	AT2G01110						115705936	XP_030489284	AT3G10370		115712315	XP_030496435	AT1G72210		115703617	XP_030486714	AT1G69200
				115712490	XP_030496629	AT3G46850						115705942	XP_030489291	AT5G18370		115712330	XP_030496464	AT2G02480		115703618	XP_030486715	AT4G21585
				115712493	XP_030496635	AT1G67856						115705984	XP_030489335	AT4G34131		115712337	XP_030496470	AT1G49480		115703628	XP_030486728	AT4G02800
				115712506	XP_030496653	AT1G28140						115705992	XP_030489344	AT1G75110		115712334	XP_030496472	AT5G55190		115703616	XP_030486746	AT5G63010
				115712545	XP_030496702	AT5G40270						115706012	XP_030489366	AT4G12070		115712342	XP_030496476	AT5G14070		115703651	XP_030486751	AT3G42725
				115712564	XP_030496722	AT4G33440						115706035	XP_030489399	AT2G05940		115712350	XP_030496481	AT4G39670		115703666	XP_030486765	AT1G17860
				115712566	XP_030496723	AT5G64040						115706039	XP_030489400	AT2G40080		115712375	XP_030496505	AT1G71790		115703665	XP_030486766	AT2G16750
				115712594	XP_030496755	AT4G12830						115706041	XP_030489402	AT5G04480		115712387	XP_030496520	AT1G24510		115703671	XP_030486771	AT5G09590
				115712642	XP_030496807	AT5G64840						115706045	XP_030489406	AT3G55990		115712405	XP_030496532	AT3G21190		115703682	XP_030486781	AT4G22140
				115712676	XP_030496863	AT2G05100						115706044	XP_030489409	AT2G25810		115712411	XP_030496545	AT4G09720		115703704	XP_030486802	AT3G63200
				115712677	XP_030496865	AT2G01320						115706056	XP_030489430	AT2G46860		115712444	XP_030496579	AT4G08250		115703710	XP_030486806	AT3G24495
				115712709	XP_030496905	AT2G47770						115706061	XP_030489437	AT4G29310		115712482	XP_030496622	AT5G65530		115703720	XP_030486814	AT3G24495
				115712710	XP_030496906	AT2G46915						115706064	XP_030489440	AT2G46560		115712489	XP_030496628	AT5G66920		115703721	XP_030486816	AT3G63170
				115712719	XP_030496919	AT4G13010						115706090	XP_030489471	AT5G25930		115712502	XP_030496648	AT2G01140		115703726	XP_030486819	AT3G16030
				115712725	XP_030496925	AT3G26085						115706108	XP_030489494	AT5G03760		115712503	XP_030496650	AT2G22250		115703732	XP_030486826	AT4G34215
				115712729	XP_030496934	AT3G01750						115706110	XP_030489496	AT3G55990		115712510	XP_030496659	AT5G51880		115703740	XP_030486832	AT5G48930
				115712741	XP_030496952	AT4G13010						115706113	XP_030489499	AT5G51290		115712516	XP_030496662	AT2G43180		115703748	XP_030486842	AT1G48460
				115712755	XP_030496969	AT5G67030						115706121	XP_030489515	AT2G36360		115712540	XP_030496692	AT3G12500		115703790	XP_030486882	AT3G61970
				115712789	XP_030497008	AT3G17670						115706122	XP_030489516	AT3G52900		115712548	XP_030496707	AT1G71750		115703792	XP_030486886	AT5G12380
				115712801	XP_030497031	AT1G70580						115706123	XP_030489517	AT4G29180		115712555	XP_030496713	AT1G13130		115703819	XP_030486910	AT5G28150
				115712843	XP_030497092	AT5G67385						115706124	XP_030489518	AT3G13750		115712573	XP_030496732	AT4G39740		115703845	XP_030486938	AT5G28060
				115712845	XP_030497095	AT3G61470						115706139	XP_030489535	AT5G18370		115712615	XP_030496779	AT1G17745		115703859	XP_030486950	AT5G62290
				115712853	XP_030497106	AT1G24040						115706159	XP_030489560	AT5G07050		115712638	XP_030496803	AT1G16780		115703885	XP_030486983	AT4G09800
				115712868	XP_030497133	AT4G28600						115706166	XP_030489570	AT2G26890		115712660	XP_030496838	AT5G10240		115703914	XP_030487009	AT5G20820
				115712925	XP_030497203	AT4G23430						115706168	XP_030489572	AT2G38120		115712662	XP_030496842	AT5G18525		115703953	XP_030487043	AT4G02390
				115712965	XP_030497262	AT5G09640						115706177	XP_030489588	AT1G17590		115712673	XP_030496859	AT4G36210		115703964	XP_030487049	AT2G06050
				115712982	XP_030497297	AT5G43700						115706211	XP_030489648	AT5G13200		115712714	XP_030496911	AT2G22500		115703972	XP_030487059	AT3G63240
				115713035	XP_030497369	AT1G16720						115706216	XP_030489654	AT4G12420		115712744	XP_030496956	AT5G26830		115704018	XP_030487101	AT3G10920
				115713039	XP_030497373	AT2G21960						115706224	XP_030489662	AT5G05570		115712747	XP_030496959	AT1G60810		115704023	XP_030487105	AT3G19500
				115713070	XP_030497411	AT1G24490						115706226	XP_030489664	AT1G19180		115712754	XP_030496968	AT1G13170		115704034	XP_030487117	AT5G07670
				115713072	XP_030497413	AT1G67480						115706235	XP_030489673	AT3G56230		115712766	XP_030496981	AT1G13440		115704043	XP_030487143	AT1G02730
				115713078	XP_030497423	AT1G23200						115706240	XP_030489682	AT2G27500		115712771	XP_030496988	AT5G09760		115704082	XP_030487165	AT3G22810
				115713105	XP_030497455	AT1G66120						115706241	XP_030489683	AT2G19580		115712778	XP_030496997	AT1G09600		115704097	XP_030487178	AT1G03170
				115713111	XP_030497460	AT1G37130						115706247	XP_030489695	AT2G27480		115712796	XP_030497023	AT3G25230		115704143	XP_030487220	AT5G56970
				115713184	XP_030497529	AT1G60550						115706255	XP_030489702	AT3G15480		115712812	XP_030497050	AT4G37750		115704175	XP_030487250	AT4G17000
				115713227	XP_030497572	AT1G78780						115706257	XP_030489706	AT2G40116		115712819	XP_030497057	AT2G18170		115704163	XP_030487259	AT2G47460
				115713266	XP_030497607	AT1G32200						115706280	XP_030489734	AT5G53130		115712833	XP_030497080	AT1G71110		115704213	XP_030487289	AT5G54380
				115713329	XP_030497670	AT5G48790						115706331	XP_030489808	AT5G05830		115712838	XP_030497086	AT1G67490		115704269	XP_030487343	AT2G31725
				115713724	XP_030498067	AT3G03990						115706346	XP_030489826	AT2G46700		115712847	XP_030497097	AT4G37990		115704267	XP_030487344	AT4G35190
				115713739	XP_030498095	AT4G01800						115706356	XP_030489836	AT3G03050		115712869	XP_030497134	AT4G21150		115704285	XP_030487360	AT3G63290
				115713781	XP_030498124	AT5G66580						115706361	XP_030489843	AT5G12080		115712878	XP_030497152	AT4G28540		115704291	XP_030487364	AT1G79720
				115713788	XP_030498132	AT4G35090						115706377	XP_030489869	AT4G37790		115712883	XP_030497158	AT4G28530		115704294	XP_030487367	AT2G45650
				115713817	XP_030498163	AT2G30600						115706382	XP_030489878	AT4G27480		115712884	XP_030497159	AT1G03900		115704317	XP_030487393	AT4G34850
				115713839	XP_030498183	AT5G44000						115706385	XP_030489881	AT3G27890		115712912	XP_030497191	AT3G25230		115704341	XP_030487411	AT1G20160
				115713858	XP_030498203	AT5G42330						115706387	XP_030489884	AT4G01250		115712937	XP_030497226	AT4G27860		115704349	XP_030487419	AT5G05620
				115713865	XP_030498210	AT1G20560						115706390	XP_030489889	AT3G55420		115712942	XP_030497235	AT3G07180		115704365	XP_030487434	AT5G05510
				115713874	XP_030498217	AT5G60440						115706409	XP_030489917	AT2G15220		115712975	XP_030497281	AT5G43990		115704407	XP_030487478	AT2G21140
				115713922	XP_030498261	AT1G67340						115706430	XP_030489940	AT5G28350		115712976	XP_030497285	AT1G10490		115704428	XP_030487493	AT3G26040
				115713909	XP_030498286	AT4G01690						115706436	XP_030489947	AT5G54160		115712984	XP_030497300	AT5G64030		115704432	XP_030487498	AT1G16330
				115713941	XP_030498288	AT5G49740						115706437	XP_030489948	AT5G54160		115712992	XP_030497309	AT1G13030		115704435	XP_030487502	AT4G29735
				115713952	XP_030498300	AT3G47430						115706441	XP_030489952	AT5G54160		115712998	XP_030497322	AT3G18990		115704456	XP_030487524	AT2G16630
				115713964	XP_030498323	AT5G42270						115706473	XP_030489990	AT3G61610		115713037	XP_030497371	AT5G67100		115704480	XP_030487545	AT5G57620
				115713990	XP_030498351	AT4G00030						115706487	XP_030490012	AT1G72820		115713060	XP_030497398	AT4G39840		115704484	XP_030487548	AT4G32890
				115714006	XP_030498366	AT4G28660						115706501	XP_030490021	AT5G05960		115713305	XP_030497644	AT1G05785		115704500	XP_030487564	AT5G20630
				115714010	XP_030498371	AT4G36040						115706505	XP_030490029	AT4G00440		115713417	XP_030497760	AT1G58420		115704498	XP_030487565	AT2G21090
				115714034	XP_030498411	AT5G07020						115706515	XP_030490045	AT2G40370		115713556	XP_030497900	AT1G27460		115704523	XP_030487588	AT4G36040
				115714057	XP_030498445	AT3G06430						115706536	XP_030490073	AT4G00530		115713617	XP_030497967	AT4G37540		115704534	XP_030487595	AT3G07040
				115714101	XP_030498500	AT4G13020						115706564	XP_030490117	AT4G33090		115713634	XP_030497982	AT5G40140		115704553	XP_030487615	AT2G26710
				115714122	XP_030498537	AT4G37470						115706578	XP_030490135	AT5G01930		115713830	XP_030498175	AT3G07420		115704533	XP_030487621	AT4G02110
				115714134	XP_030498554	AT1G60470						115706579	XP_030490137	AT5G01930		115713842	XP_030498185	AT3G25180		115704567	XP_030487629	AT4G12560
				115714153	XP_030498582	AT3G29240						115706590	XP_030490147	AT4G00750		115713878	XP_030498219	AT5G43960		115704569	XP_030487631	AT1G11340
				115714156	XP_030498588	AT4G35750						115706587	XP_030490149	AT4G33090		115713956	XP_030498311	AT4G35240		115704572	XP_030487636	AT2G24960
				115714167	XP_030498599	AT1G76110						115706668	XP_030490242	AT3G53260		115713968	XP_030498325	AT5G10020		115704583	XP_030487649	AT4G38660
				115714180	XP_030498615	AT1G70820						115706670	XP_030490244	AT1G78440		115713991	XP_030498354	AT3G07510		115704594	XP_030487657	AT4G38650
				115714181	XP_030498616	AT1G14870						115706677	XP_030490250	AT1G17120		115714009	XP_030498370	AT3G17380		115704624	XP_030487686	AT4G04880
				115714183	XP_030498619	AT1G14870						115706685	XP_030490263	AT5G12010		115714002	XP_030498402	AT3G62110		115704637	XP_030487699	AT1G16150
				115714187	XP_030498622	AT2G01620						115706765	XP_030490365	AT1G54270		115714045	XP_030498430	AT2G38010		115704640	XP_030487701	AT5G48930
				115714189	XP_030498625	AT3G17860						115706776	XP_030490370	AT1G78530		115714069	XP_030498463	AT3G25110		115704638	XP_030487702	AT4G34960
				115714200	XP_030498643	AT5G08720						115706792	XP_030490383	AT1G17020		115714070	XP_030498464	AT5G65270		115704664	XP_030487728	AT4G03270
				115714229	XP_030498699	AT1G25400						115706796	XP_030490388	AT1G06890		115714105	XP_030498510	AT5G10260		115704667	XP_030487730	AT5G12380
				115714260	XP_030498750	AT1G59840						115706799	XP_030490393	AT1G54120		115714116	XP_030498521	AT3G51060		115704674	XP_030487732	AT5G20810
				115714272	XP_030498768	AT1G18330						115706817	XP_030490422	AT1G19180		115714118	XP_030498522	AT1G70710		115704690	XP_030487751	AT5G49330
				115714280	XP_030498784	AT4G27670						115706821	XP_030490428	AT5G02970		115714117	XP_030498526	AT4G38430		115704669	XP_030487762	AT2G47440
				115714304	XP_030498813	AT2G35660						115706822	XP_030490430	AT2G30900		115714123	XP_030498539	AT2G30690		115704719	XP_030487783	AT4G38620
				115714351	XP_030498886	AT1G74880						115706831	XP_030490442	AT2G39420		115714135	XP_030498555	AT1G10630		115704720	XP_030487785	AT1G49310
				115714385	XP_030498930	AT1G67700						115706844	XP_030490461	AT2G26170		115714148	XP_030498573	AT1G48410		115704735	XP_030487805	AT5G20850
				115714407	XP_030498965	AT5G66520						115706853	XP_030490470	AT1G50030		115714149	XP_030498574	AT3G13000		115704737	XP_030487806	AT3G61650
				115714426	XP_030498991	AT4G36850						115706855	XP_030490474	AT1G61250		115714162	XP_030498591	AT1G68050		115704739	XP_030487807	AT3G57040
				115714433	XP_030498998	AT4G36530						115706862	XP_030490481	AT5G54390		115714163	XP_030498592	AT1G14830		115704743	XP_030487810	AT1G72570
				115714495	XP_030499078	AT5G40250						115706883	XP_030490502	AT4G05000		115714164	XP_030498593	AT1G67730		115704745	XP_030487813	AT1G05420
				115714497	XP_030499082	AT4G37180						115706893	XP_030490515	AT4G21540		115714192	XP_030498631	AT2G01660		115704754	XP_030487818	AT5G05510
				115714511	XP_030499097	AT1G78915						115706916	XP_030490548	AT1G11260		115714211	XP_030498662	AT4G39790		115704761	XP_030487829	AT5G62410
				115714523	XP_030499112	AT4G15545						115706938	XP_030490576	AT1G17020		115714214	XP_030498665	AT2G22480		115704774	XP_030487838	AT3G43110
				115714527	XP_030499118	AT5G38430						115706947	XP_030490587	AT1G72960		115714219	XP_030498671	AT3G07120		115704778	XP_030487843	AT3G61680
				115714535	XP_030499128	AT2G31180						115706951	XP_030490594	AT2G45360		115714223	XP_030498680	AT4G39820		115704793	XP_030487860	AT5G20850
				115714544	XP_030499137	AT3G13080						115706952	XP_030490595	AT5G56890		115714227	XP_030498688	AT3G18730		115704790	XP_030487861	AT2G20980
				115714550	XP_030499148	AT1G07700						115706955	XP_030490598	AT1G17620		115714238	XP_030498724	AT5G64970		115704805	XP_030487871	AT3G61790
				115714578	XP_030499182	AT4G31870						115706953	XP_030490600	AT4G33040		115714241	XP_030498726	AT1G71140		115704807	XP_030487874	AT5G07330
				115714600	XP_030499204	AT5G48545						115706966	XP_030490610	AT1G21651		115714246	XP_030498731	AT1G31660		115704819	XP_030487886	AT5G19730
				115714581	XP_030499216	AT2G20180						115706969	XP_030490614	AT2G40370		115714256	XP_030498746	AT5G20500		115704560	XP_030487896	AT5G12890
				115714622	XP_030499228	AT4G28703						115706997	XP_030490650	AT1G17640		115714268	XP_030498761	AT3G26430		115704832	XP_030487903	AT1G01250
				115714644	XP_030499251	AT3G56500						115707009	XP_030490664	AT1G17500		115714274	XP_030498770	AT5G65420		115704833	XP_030487904	AT5G07430
				115714646	XP_030499256	AT1G58200						115707013	XP_030490668	AT5G07990		115714311	XP_030498823	AT3G17380		115704837	XP_030487908	AT3G13960
				115714669	XP_030499279	AT2G20260						115707034	XP_030490705	AT1G72830		115714316	XP_030498827	AT2G33470		115704848	XP_030487920	AT5G01420
				115714684	XP_030499301	AT3G25410						115707037	XP_030490718	AT5G20510		115714369	XP_030498906	AT4G24610		115704851	XP_030487923	AT2G23060
				115714688	XP_030499303	AT1G67840						115707044	XP_030490726	AT3G61540		115714382	XP_030498926	AT3G20330		115704855	XP_030487928	AT4G35050
				115714839	XP_030499459	AT1G25440						115707051	XP_030490731	AT1G06890		115714386	XP_030498931	AT3G26300		115704864	XP_030487933	AT4G25150
				115714852	XP_030499480	AT4G36380						115707048	XP_030490732	AT1G10970		115714393	XP_030498940	AT4G36520		115704871	XP_030487941	AT1G54050
				115714873	XP_030499495	AT4G13200						115707066	XP_030490755	AT5G07990		115714409	XP_030498967	AT5G03260		115704873	XP_030487945	AT5G45550
				115714880	XP_030499501	AT3G20750						115707072	XP_030490760	AT5G12330		115714410	XP_030498968	AT5G66730		115704874	XP_030487948	AT4G35070
				115714908	XP_030499526	AT1G70200						115707073	XP_030490765	AT4G16745		115714421	XP_030498983	AT5G66680		115704879	XP_030487951	AT1G79860
				115714924	XP_030499542	AT1G23400						115707081	XP_030490778	AT2G40230		115714425	XP_030498990	AT4G36680		115704880	XP_030487952	AT2G46225
				115714934	XP_030499559	AT3G26570						115707090	XP_030490794	AT5G45540		115714461	XP_030499043	AT2G18290		115704883	XP_030487955	AT2G45400
				115714950	XP_030499573	AT4G13310						115707097	XP_030490803	AT5G07990		115714464	XP_030499048	AT4G36660		115704886	XP_030487957	AT5G19730
				115714990	XP_030499629	AT5G66470						115707098	XP_030490804	AT2G05940		115714474	XP_030499062	AT1G45207		115704892	XP_030487961	AT2G22260
				115715011	XP_030499650	AT5G64440						115707100	XP_030490807	AT3G55420		115714501	XP_030499086	AT3G07180		115704898	XP_030487971	AT3G62870
				115715052	XP_030499704	AT4G13310						115707123	XP_030490841	AT1G17370		115714517	XP_030499105	AT1G65780		115704901	XP_030487973	AT5G19650
				115715127	XP_030499800	AT4G39970						115707132	XP_030490848	AT3G14130		115714526	XP_030499117	AT1G13380		115704912	XP_030487990	AT3G16490
				115715128	XP_030499801	AT3G12500						115707133	XP_030490851	AT3G14130		115714557	XP_030499152	AT5G66860		115704913	XP_030487992	AT4G14550
				115715161	XP_030499842	AT5G10250						115707139	XP_030490862	AT3G14172		115714558	XP_030499153	AT1G28690		115704922	XP_030488004	AT5G48380
				115715194	XP_030499885	AT1G23870						115707149	XP_030490872	AT3G14200		115714559	XP_030499154	AT5G47960		115704933	XP_030488013	AT1G72430
				115715199	XP_030499889	AT4G28740						115707147	XP_030490876	AT5G11810		115714569	XP_030499169	AT4G37700		115704942	XP_030488019	AT2G45190
				115715246	XP_030499946	AT1G10500						115707153	XP_030490879	AT5G51160		115714571	XP_030499172	AT4G34450		115704946	XP_030488023	AT5G49330
				115715257	XP_030499958	AT2G45560						115707154	XP_030490881	AT5G51160		115714628	XP_030499235	AT1G09730		115704959	XP_030488028	AT5G45550
				115715258	XP_030499961	AT1G15140						115707156	XP_030490885	AT4G33000		115714638	XP_030499245	AT4G24530		115704972	XP_030488054	AT5G24510
				115715270	XP_030499975	AT1G28100						115707160	XP_030490886	AT5G40990		115714659	XP_030499269	AT5G65670		115704977	XP_030488060	AT5G46795
				115715294	XP_030500005	AT1G22990						115707171	XP_030490899	AT1G53910		115714667	XP_030499281	AT3G05430		115704995	XP_030488079	AT2G45190
				115715296	XP_030500008	AT2G01590						115707181	XP_030490919	AT3G14280		115714722	XP_030499340	AT1G68290		115704998	XP_030488086	AT3G23560
				115715302	XP_030500012	AT3G57680						115707212	XP_030490955	AT5G05830		115714739	XP_030499354	AT5G48820		115705001	XP_030488091	AT2G19790
				115715307	XP_030500020	AT3G26300						115707213	XP_030490956	AT1G53035		115714740	XP_030499355	AT1G67810		115705011	XP_030488101	AT3G55280
				115715316	XP_030500031	AT5G09820						115707223	XP_030490966	AT2G39910		115714781	XP_030499392	AT4G27860		115705012	XP_030488104	AT5G04970
				115715576	XP_030500071	AT1G50900						115707209	XP_030490989	AT2G16760		115714785	XP_030499397	AT2G22840		115705015	XP_030488109	AT3G55470
				115715579	XP_030500078	AT4G33580						115707250	XP_030491004	AT5G47810		115714814	XP_030499441	AT5G64660		115705016	XP_030488110	AT4G22030
				115715618	XP_030500131	AT4G24040						115707258	XP_030491020	AT1G49570		115714867	XP_030499490	AT3G12500		115705020	XP_030488112	AT3G60670
				115715627	XP_030500145	AT3G05200						115707268	XP_030491037	AT5G47635		115714869	XP_030499491	AT5G09840		115705021	XP_030488113	AT4G27240
				115715641	XP_030500161	AT1G64680						115707272	XP_030491043	AT4G16370		115714887	XP_030499505	AT4G37630		115705024	XP_030488118	AT4G29735
				115715650	XP_030500171	AT4G25570						115707279	XP_030491050	AT4G17220		115714889	XP_030499508	AT5G09810		115705025	XP_030488119	AT3G55700
				115715656	XP_030500174	AT4G23990						115707291	XP_030491065	AT4G32980		115714919	XP_030499538	AT1G60790		115705032	XP_030488126	AT1G50830
				115715658	XP_030500175	AT5G62040						115707298	XP_030491070	AT5G20540		115714933	XP_030499555	AT1G70630		115705038	XP_030488140	AT4G09670
				115715671	XP_030500189	AT4G19010						115707307	XP_030491081	AT2G16980		115714956	XP_030499579	AT5G67020		115705054	XP_030488155	AT5G24510
				115715680	XP_030500198	AT4G10120						115707312	XP_030491085	AT2G28130		115714969	XP_030499594	AT5G10150		115705057	XP_030488157	AT1G80080
				115715691	XP_030500211	AT1G21680						115707309	XP_030491086	AT5G26010		115714970	XP_030499596	AT1G68300		115705058	XP_030488158	AT4G26260
				115715706	XP_030500228	AT5G52900						115707321	XP_030491100	AT5G53130		115714986	XP_030499622	AT1G24440		115705062	XP_030488164	AT5G48100
				115715709	XP_030500230	AT4G37370						115707329	XP_030491119	AT4G16490		115714998	XP_030499635	AT2G14750		115705068	XP_030488167	AT4G29740
				115715710	XP_030500231	AT5G53130						115707332	XP_030491120	AT5G47530		115715003	XP_030499644	AT4G39700		115705070	XP_030488169	AT5G16010
				115715712	XP_030500234	AT5G53130						115707337	XP_030491125	AT5G22820		115715020	XP_030499663	AT1G60030		115705096	XP_030488195	AT1G53920
				115715735	XP_030500262	AT4G33740						115707345	XP_030491134	AT3G50950		115715024	XP_030499669	AT4G02610		115705099	XP_030488197	AT5G62420
				115715748	XP_030500278	AT1G01490						115707352	XP_030491142	AT4G12570		115715069	XP_030499722	AT3G54650		115705113	XP_030488212	AT1G47710
				115715771	XP_030500303	AT5G42070						115707405	XP_030491222	AT4G22160		115715077	XP_030499732	AT4G16850		115705114	XP_030488213	AT3G50390
				115715805	XP_030500336	AT1G32250						115707425	XP_030491244	AT1G61660		115715138	XP_030499810	AT1G69910		115705117	XP_030488217	AT5G58380
				115715813	XP_030500345	AT3G61060						115707459	XP_030491289	AT4G05200		115715139	XP_030499811	AT1G27150		115705126	XP_030488227	AT2G40010
				115715837	XP_030500364	AT1G64700						115707460	XP_030491293	AT4G05200		115715151	XP_030499831	AT1G27850		115705153	XP_030488253	AT2G01720
				115715843	XP_030500369	AT1G64720						115707468	XP_030491304	AT1G01580		115715166	XP_030499847	AT2G24960		115705177	XP_030488289	AT4G29430
				115715873	XP_030500403	AT5G38260						115707479	XP_030491316	AT4G21215		115715182	XP_030499872	AT2G38940		115705180	XP_030488293	AT5G08460
				115715920	XP_030500457	AT2G45680						115707480	XP_030491318	AT4G21210		115715218	XP_030499920	AT5G48500		115705183	XP_030488294	AT2G19680
				115715926	XP_030500468	AT1G72030						115707481	XP_030491320	AT3G13980		115715220	XP_030499922	AT1G04040		115705217	XP_030488344	AT4G32890
				115715930	XP_030500472	AT2G27550						115707482	XP_030491321	AT2G03500		115715229	XP_030499928	AT2G22420		115705219	XP_030488346	AT1G54385
				115716022	XP_030500570	AT5G53170						115707491	XP_030491336	AT4G29080		115715262	XP_030499966	AT1G77420		115705231	XP_030488360	AT3G13690
				115716023	XP_030500571	AT1G32440						115707495	XP_030491343	AT3G16220		115715269	XP_030499974	AT1G28110		115705239	XP_030488377	AT1G15520
				115716079	XP_030500651	AT4G22890						115707510	XP_030491365	AT3G07040		115715276	XP_030499982	AT1G16860		115705237	XP_030488379	AT2G16730
				115716101	XP_030500682	AT4G17090						115707515	XP_030491373	AT1G52150		115715289	XP_030499998	AT5G48580		115705242	XP_030488382	AT1G15520
				115716103	XP_030500684	AT4G17080						115707529	XP_030491393	AT5G57685		115715291	XP_030500001	AT4G31480		115705246	XP_030488390	AT1G22710
				115716157	XP_030500760	AT3G61610						115707533	XP_030491397	AT5G48120		115715327	XP_030500044	AT3G07420		115705259	XP_030488399	AT1G15660
				115716162	XP_030500767	AT1G32070						115707543	XP_030491410	AT3G16500		115715584	XP_030500082	AT5G16860		115705261	XP_030488402	AT3G15550
				115716184	XP_030500784	AT3G14840						115707547	XP_030491413	AT4G29130		115715591	XP_030500092	AT4G24060		115705262	XP_030488403	AT3G16000
				115716187	XP_030500790	AT5G24490						115707563	XP_030491435	AT1G52080		115715595	XP_030500100	AT5G62360		115705265	XP_030488408	AT3G15940
				115716208	XP_030500810	AT1G32060						115707571	XP_030491446	AT3G13730		115715596	XP_030500101	AT4G10810		115705269	XP_030488412	AT5G11470
				115716252	XP_030500871	AT2G41120						115707573	XP_030491447	AT4G33000		115715610	XP_030500113	AT1G32860		115705273	XP_030488423	AT3G15620
				115716254	XP_030500874	AT1G12240						115707592	XP_030491465	AT2G20770		115715692	XP_030500212	AT4G39980		115705277	XP_030488432	AT1G15570
				115716276	XP_030500895	AT1G62750						115707611	XP_030491484	AT4G15450		115715745	XP_030500273	AT5G24580		115705282	XP_030488444	AT1G03180
				115716280	XP_030500900	AT1G12110						115707631	XP_030491507	AT4G21380		115715758	XP_030500290	AT4G11950		115705297	XP_030488459	AT5G25460
				115716281	XP_030500902	AT1G12110						115707633	XP_030491510	AT4G21390		115715781	XP_030500314	AT4G10490		115705298	XP_030488460	AT3G15850
				115716283	XP_030500904	AT4G12300						115707634	XP_030491511	AT1G61370		115715786	XP_030500318	AT5G38610		115705300	XP_030488464	AT1G15550
				115716284	XP_030500905	AT4G12300						115707638	XP_030491519	AT4G33650		115715812	XP_030500343	AT5G24170		115705308	XP_030488476	AT1G79915
				115716292	XP_030500914	AT1G62780						115707643	XP_030491522	AT2G28760		115715816	XP_030500347	AT1G28110		115705315	XP_030488485	AT1G52820
				115716353	XP_030500991	AT1G32060						115707661	XP_030491550	AT4G33650		115715870	XP_030500400	AT5G47510		115705334	XP_030488507	AT3G15540
				115716364	XP_030501003	AT1G54130						115707665	XP_030491552	AT4G05150		115715883	XP_030500418	AT4G10530		115705340	XP_030488515	AT5G11280
				115716432	XP_030501082	AT3G23510						115707683	XP_030491572	AT4G22160		115715897	XP_030500434	AT2G23910		115705341	XP_030488516	AT4G19640
				115716439	XP_030501093	AT4G01370						115707688	XP_030491576	AT2G26440		115715912	XP_030500447	AT4G27730		115705342	XP_030488518	AT1G80190
				115716440	XP_030501094	AT1G12800						115707692	XP_030491580	AT1G62360		115715986	XP_030500528	AT2G46780		115705343	XP_030488520	AT1G04250
				115716451	XP_030501112	AT1G73885						115707695	XP_030491583	AT1G62330		115716007	XP_030500554	AT3G49260		115705346	XP_030488526	AT2G41475
				115716452	XP_030501113	AT5G62220						115707697	XP_030491585	AT4G04320		115716085	XP_030500655	AT1G64390		115705351	XP_030488535	AT1G52690
				115716465	XP_030501132	AT3G07040						115707716	XP_030491607	AT1G62400		115716090	XP_030500662	AT5G23540		115705360	XP_030488548	AT3G15630
				115716468	XP_030501134	AT4G17970						115707726	XP_030491617	AT1G62290		115716121	XP_030500708	AT1G63430		115705362	XP_030488549	AT1G52680
				115716472	XP_030501139	AT4G17840						115707734	XP_030491629	AT4G17180		115716145	XP_030500743	AT5G41620		115705363	XP_030488553	AT2G25735
				115716525	XP_030501195	AT2G35490						115707763	XP_030491679	AT1G11700		115716156	XP_030500759	AT4G23750		115705365	XP_030488555	AT1G15385
				115716580	XP_030501268	AT1G64860						115707781	XP_030491708	AT4G21870		115716159	XP_030500762	AT4G23720		115705374	XP_030488560	AT3G24503
				115716609	XP_030501300	AT4G17600						115707813	XP_030491746	AT1G11580		115716192	XP_030500793	AT5G53560		115705372	XP_030488561	AT3G54710
				115716613	XP_030501303	AT1G64970						115707825	XP_030491762	AT1G52190		115716201	XP_030500800	AT5G02500		115705379	XP_030488570	AT3G56130
				115716614	XP_030501304	AT4G31850						115707831	XP_030491776	AT2G15220		115716233	XP_030500845	AT5G02500		115705404	XP_030488599	AT1G19130
				115716615	XP_030501305	AT2G16790						115707837	XP_030491780	AT1G45688		115716237	XP_030500852	AT4G11820		115705387	XP_030488613	AT4G02070
				115716632	XP_030501333	AT5G52100						115707864	XP_030491809	AT1G55790		115716245	XP_030500862	AT1G33260		115705437	XP_030488633	AT3G24630
				115716643	XP_030501349	AT1G64430						115707863	XP_030491812	AT1G44170		115716264	XP_030500884	AT5G22060		115705443	XP_030488639	AT2G19780
				115716653	XP_030501359	AT4G01370						115707911	XP_030491870	AT1G80760		115716272	XP_030500893	AT1G07350		115705444	XP_030488640	AT5G07440
				115716684	XP_030501396	AT5G24120						115707913	XP_030491873	AT1G80760		115716273	XP_030500894	AT5G10920		115705447	XP_030488643	AT1G54270
				115716712	XP_030501448	AT4G25570						115707914	XP_030491874	AT1G15910		115716282	XP_030500903	AT4G12400		115705455	XP_030488653	AT3G54400
				115716725	XP_030501464	AT1G18060						115707919	XP_030491882	AT1G15960		115716287	XP_030500908	AT4G22670		115705470	XP_030488667	AT3G24495
				115716733	XP_030501475	AT4G00050						115707920	XP_030491884	AT1G15950		115716290	XP_030500912	AT1G62730		115705523	XP_030488727	AT2G46710
				115716737	XP_030501485	AT4G25450						115707946	XP_030491923	AT3G57710		115716293	XP_030500915	AT5G62360		115705526	XP_030488732	AT5G63630
				115716744	XP_030501500	AT1G18485						115707956	XP_030491932	AT5G48930		115716301	XP_030500922	AT1G62790		115705527	XP_030488737	AT3G50390
				115716748	XP_030501504	AT2G42010						115707966	XP_030491945	AT1G16030		115716318	XP_030500940	AT5G24400		115705533	XP_030488750	AT3G22810
				115716757	XP_030501513	AT5G53190						115707967	XP_030491946	AT1G16030		115716360	XP_030500999	AT4G23790		115705551	XP_030488769	AT3G61670
				115716763	XP_030501519	AT5G16650						115707974	XP_030491956	AT1G78540		115716373	XP_030501016	AT4G16650		115705558	XP_030488779	AT1G60660
				115716767	XP_030501525	AT4G27800						115707973	XP_030491958	AT1G21730		115716406	XP_030501052	AT1G63470		115705565	XP_030488791	AT2G45220
				115716769	XP_030501527	AT4G27700						115707993	XP_030491993	AT5G23110		115716422	XP_030501069	AT1G04590		115705569	XP_030488797	AT5G20720
				115716781	XP_030501542	AT4G24090						115708012	XP_030492020	AT5G08260		115716429	XP_030501079	AT1G02000		115705578	XP_030488808	AT1G01300
				115716795	XP_030501558	AT1G08550						115708013	XP_030492024	AT1G02700		115716433	XP_030501084	AT5G41950		115705602	XP_030488839	AT2G45280
				115716797	XP_030501561	AT2G04700						115708029	XP_030492053	AT3G59660		115716455	XP_030501120	AT5G24280		115705574	XP_030488843	AT4G02060
				115716827	XP_030501595	AT3G22370						115708034	XP_030492062	AT3G59690		115716529	XP_030501200	AT1G32930		115705614	XP_030488858	AT3G55430
				115716837	XP_030501602	AT5G07240						115708057	XP_030492087	AT2G30720		115716551	XP_030501225	AT3G49500		115705624	XP_030488878	AT5G62350
				115716868	XP_030501632	AT4G01100						115708058	XP_030492088	AT1G05690		115716586	XP_030501274	AT4G33410		115705642	XP_030488903	AT3G43270
				115716874	XP_030501645	AT2G35410						115708062	XP_030492094	AT5G05340		115716597	XP_030501287	AT1G12310		115705650	XP_030488911	AT5G58420
				115716934	XP_030501716	AT5G41410						115708075	XP_030492112	AT2G44060		115716601	XP_030501291	AT5G24430		115705674	XP_030488935	AT3G19660
				115716959	XP_030501749	AT5G17400						115708085	XP_030492130	AT2G44160		115716605	XP_030501299	AT4G16740		115705678	XP_030488937	AT1G75270
				115716971	XP_030501759	AT5G38430						115708111	XP_030492166	AT2G46770		115716665	XP_030501376	AT1G79620		115705684	XP_030488946	AT1G43800
				115716981	XP_030501766	AT3G04760						115708137	XP_030492194	AT1G17230		115716666	XP_030501377	AT1G79620		115705703	XP_030488969	AT5G61820
				115717003	XP_030501787	AT4G08850						115708135	XP_030492195	AT3G16770		115716678	XP_030501390	AT4G19120		115705706	XP_030488980	AT3G62870
				115717004	XP_030501788	AT5G62140						115708138	XP_030492197	AT3G12090		115716686	XP_030501398	AT4G18030		115705708	XP_030488981	AT5G49890
				115717010	XP_030501797	AT1G64355						115708139	XP_030492198	AT2G37900		115716690	XP_030501406	AT1G33170		115705717	XP_030488991	AT5G04530
				115717013	XP_030501801	AT5G07240						115708151	XP_030492220	AT2G28550		115716706	XP_030501435	AT1G64890		115705733	XP_030489012	AT3G03770
				115717033	XP_030501831	AT5G53130						115708164	XP_030492235	AT3G61460		115716711	XP_030501447	AT2G46170		115705745	XP_030489030	AT2G45550
				115717065	XP_030501863	AT3G59140						115708165	XP_030492236	AT1G52140		115716717	XP_030501453	AT4G11650		115705746	XP_030489031	AT3G14370
				115717069	XP_030501867	AT5G23750						115708167	XP_030492237	AT2G39510		115716749	XP_030501505	AT2G46380		115705757	XP_030489045	AT2G36290
				115717087	XP_030501886	AT4G21780						115708178	XP_030492245	AT1G11915		115716785	XP_030501547	AT1G63220		115705759	XP_030489048	AT2G36290
				115717101	XP_030501905	AT1G32080						115708180	XP_030492249	AT5G05760		115716809	XP_030501576	AT4G33550		115705761	XP_030489051	AT3G54290
				115717164	XP_030501976	AT1G71500						115708184	XP_030492252	AT4G29100		115716844	XP_030501610	AT5G53400		115705762	XP_030489052	AT2G36290
				115717182	XP_030501999	AT3G05170						115708188	XP_030492254	AT5G53560		115716867	XP_030501631	AT5G10920		115705767	XP_030489064	AT2G25100
				115717228	XP_030502059	AT4G27940						115708189	XP_030492255	AT3G45650		115716872	XP_030501643	AT5G23750		115705769	XP_030489066	AT5G16010
				115717243	XP_030502075	AT2G35370						115708192	XP_030492258	AT4G10350		115716918	XP_030501699	AT5G23950		115705776	XP_030489075	AT1G20030
				115717254	XP_030502083	AT5G53050						115708224	XP_030492303	AT2G38310		115716919	XP_030501700	AT1G32090		115705785	XP_030489090	AT3G19270
				115717257	XP_030502087	AT1G12480						115708231	XP_030492309	AT5G55090		115716927	XP_030501708	AT4G22730		115705791	XP_030489094	AT3G10080
				115717275	XP_030502103	AT5G17170						115708252	XP_030492333	AT3G50950		115716933	XP_030501715	AT3G50280		115705795	XP_030489099	AT1G01370
				115717311	XP_030502140	AT5G24030						115708256	XP_030492338	AT1G72310		115716940	XP_030501727	AT4G27880		115705800	XP_030489106	AT4G39200
				115717321	XP_030502152	AT5G52100						115708264	XP_030492347	AT5G54160		115716958	XP_030501747	AT4G12440		115705805	XP_030489110	AT1G72250
				115717331	XP_030502164	AT4G11410						115708265	XP_030492348	AT3G42800		115717005	XP_030501789	AT3G49250		115705816	XP_030489116	AT3G07990
				115717339	XP_030502170	AT4G17360						115708285	XP_030492374	AT4G10350		115717050	XP_030501851	AT5G42020		115705828	XP_030489133	AT1G01120
				115717341	XP_030502172	AT4G25170						115708302	XP_030492389	AT4G12560		115717055	XP_030501854	AT5G52760		115705836	XP_030489140	AT2G33640
				115717352	XP_030502180	AT5G52030						115708303	XP_030492392	AT4G12560		115717063	XP_030501861	AT2G04940		115705837	XP_030489142	AT5G05730
				115717359	XP_030502188	AT5G01920						115708331	XP_030492432	AT4G35580		115717066	XP_030501864	AT3G59140		115705839	XP_030489147	AT4G00170
				115717366	XP_030502194	AT1G62850						115708338	XP_030492439	AT4G00230		115717086	XP_030501885	AT5G54850		115705840	XP_030489148	AT4G00165
				115717377	XP_030502205	AT4G19070						115708345	XP_030492446	AT3G61850		115717111	XP_030501915	AT4G22580		115705841	XP_030489149	AT3G60660
				115717421	XP_030502265	AT5G54770						115708349	XP_030492453	AT1G10390		115717134	XP_030501945	AT5G47420		115705843	XP_030489150	AT2G45180
				115717442	XP_030502289	AT5G53580						115708359	XP_030492468	AT5G25530		115717135	XP_030501946	AT5G23950		115705851	XP_030489157	AT2G45220
				115717453	XP_030502300	AT3G26710						115708648	XP_030492487	AT1G74660		115717153	XP_030501962	AT3G60450		115705861	XP_030489166	AT4G23980
				115717636	XP_030502502	AT3G63410						115708650	XP_030492490	AT1G69850		115717200	XP_030502021	AT4G29870		115705871	XP_030489178	AT2G46710
				115717728	XP_030502568	AT5G62180						115708652	XP_030492492	AT3G18300		115717217	XP_030502037	AT1G67325		115705924	XP_030489260	AT3G54000
				115717835	XP_030502666	AT2G32500						115708653	XP_030492493	AT5G02880		115717236	XP_030502070	AT1G49350		115705929	XP_030489268	AT3G54870
				115717971	XP_030502801	AT1G12370						115708661	XP_030492505	AT2G37440		115717285	XP_030502115	AT2G44610		115705934	XP_030489279	AT1G20160
				115718142	XP_030502962	AT5G51720						115708674	XP_030492515	AT3G59340		115717296	XP_030502127	AT5G17210		115705982	XP_030489330	AT3G26040
				115718146	XP_030502967	AT3G11010						115708679	XP_030492521	AT5G59830		115717303	XP_030502132	AT5G23760		115705985	XP_030489332	AT3G26040
				115718171	XP_030502993	AT4G17030						115708682	XP_030492526	AT3G57670		115717314	XP_030502142	AT4G16770		115706008	XP_030489362	AT5G04310
				115718172	XP_030502994	AT5G24460						115708662	XP_030492537	AT2G16060		115717347	XP_030502177	AT5G12250		115706016	XP_030489372	AT5G04320
				115718410	XP_030503045	AT1G51110						115708703	XP_030492556	AT3G10080		115717438	XP_030502284	AT5G62150		115706018	XP_030489374	AT5G22930
				115718439	XP_030503082	AT1G10090						115708710	XP_030492564	AT3G01500		115717452	XP_030502299	AT5G46700		115706025	XP_030489383	AT5G44680
				115718093	XP_030503098	AT4G14210						115708721	XP_030492580	AT4G16340		115717645	XP_030502487	AT3G51550		115706036	XP_030489396	AT3G55090
				115718474	XP_030503119	AT2G01870						115708722	XP_030492581	AT3G14470		115717999	XP_030502828	AT1G75280		115706051	XP_030489422	AT5G41990
				115718476	XP_030503122	AT5G59750						115708733	XP_030492595	AT1G66080		115718143	XP_030502963	AT5G23870		115706050	XP_030489424	AT5G21950
				115718490	XP_030503148	AT2G30170						115708735	XP_030492598	AT1G23380		115718184	XP_030503008	AT5G23870		115706065	XP_030489441	AT1G01120
				115718504	XP_030503163	AT2G21530						115708744	XP_030492607	AT3G59340		115718402	XP_030503028	AT3G05870		115706071	XP_030489448	AT3G54000
				115718534	XP_030503195	AT1G08520						115708754	XP_030492621	AT3G18260		115718429	XP_030503068	AT1G07300		115706097	XP_030489480	AT4G20140
				115718564	XP_030503226	AT5G58260						115708759	XP_030492623	AT4G36920		115718441	XP_030503083	AT3G24280		115706103	XP_030489488	AT4G23980
				115718599	XP_030503269	AT1G08080						115708762	XP_030492635	AT3G44735		115718495	XP_030503152	AT1G60690		115706117	XP_030489510	AT5G04660
				115718636	XP_030503311	AT3G20898						115708767	XP_030492640	AT2G37330		115718497	XP_030503155	AT3G05740		115706132	XP_030489530	AT4G29170
				115718648	XP_030503330	AT5G26820						115708768	XP_030492641	AT3G57510		115718520	XP_030503182	AT1G60870		115706133	XP_030489531	AT5G55160
				115718740	XP_030503425	AT2G29500						115708776	XP_030492648	AT3G08490		115718570	XP_030503232	AT3G46850		115706147	XP_030489542	AT3G52870
				115718750	XP_030503433	AT3G05625						115708777	XP_030492649	AT3G48270		115718585	XP_030503255	AT5G58630		115706175	XP_030489586	AT2G26330
				115718777	XP_030503463	AT5G16530						115708806	XP_030492682	AT3G57510		115718640	XP_030503319	AT2G36980		115706178	XP_030489590	AT2G26910
				115718791	XP_030503476	AT1G07110						115708820	XP_030492696	AT2G27690		115718659	XP_030503343	AT3G60470		115706183	XP_030489597	AT2G26730
				115718794	XP_030503479	AT2G38540						115708821	XP_030492697	AT1G16560		115718709	XP_030503395	AT5G42370		115706186	XP_030489604	AT5G19980
				115718806	XP_030503487	AT5G58310						115708827	XP_030492703	AT5G08370		115718731	XP_030503417	AT5G58300		115706187	XP_030489608	AT5G05730
				115718881	XP_030503547	AT5G59730						115708840	XP_030492718	AT2G34930		115718760	XP_030503444	AT5G59020		115706192	XP_030489617	AT2G26640
				115718911	XP_030503594	AT5G42390						115708841	XP_030492719	AT1G04410		115718843	XP_030503513	AT1G09160		115706204	XP_030489634	AT1G52720
				115718932	XP_030503622	AT1G54780						115708861	XP_030492737	AT1G74460		115718869	XP_030503540	AT1G72160		115706217	XP_030489655	AT5G53760
				115718945	XP_030503635	AT5G59610						115708874	XP_030492749	AT3G50120		115718888	XP_030503555	AT3G44200		115706225	XP_030489663	AT2G46660
				115718950	XP_030503637	AT1G50180						115708894	XP_030492777	AT3G08040		115718931	XP_030503620	AT1G54790		115706265	XP_030489713	AT4G21760
				115718955	XP_030503645	AT4G16690						115708895	XP_030492779	AT1G08080		115718940	XP_030503627	AT5G22070		115706271	XP_030489718	AT5G20050
				115718993	XP_030503686	AT1G56560						115708900	XP_030492785	AT1G15125		115718944	XP_030503633	AT3G46640		115706277	XP_030489731	AT4G37850
				115719019	XP_030503737	AT5G59080						115708902	XP_030492786	AT1G31320		115718973	XP_030503667	AT3G45850		115706290	XP_030489745	AT2G40550
				115719033	XP_030503771	AT4G14880						115708908	XP_030492793	AT5G23660		115718978	XP_030503673	AT5G63650		115706295	XP_030489755	AT2G39390
				115719040	XP_030503784	AT4G12800						115708910	XP_030492795	AT5G03840		115719005	XP_030503714	AT4G02750		115706296	XP_030489756	AT1G53140
				115719042	XP_030503786	AT5G36700						115708929	XP_030492817	AT3G14470		115719061	XP_030503824	AT1G56720		115706309	XP_030489774	AT4G33720
				115719138	XP_030503927	AT3G14470						115708930	XP_030492818	AT3G57230		115719065	XP_030503827	AT2G29560		115706314	XP_030489788	AT2G31610
				115719149	XP_030503939	AT1G11300						115708939	XP_030492824	AT4G22390		115719069	XP_030503831	AT5G12950		115706319	XP_030489791	AT2G39020
				115719169	XP_030503965	AT4G00340						115708966	XP_030492847	AT2G41810		115719070	XP_030503832	AT5G05830		115706323	XP_030489798	AT3G53740
				115719246	XP_030504068	AT3G46780						115709007	XP_030492887	AT1G15125		115719086	XP_030503855	AT1G09430		115706324	XP_030489799	AT3G24515
				115719252	XP_030504073	AT5G58870						115709009	XP_030492889	AT2G36460		115719118	XP_030503899	AT5G18410		115706345	XP_030489825	AT2G45410
				115719253	XP_030504075	AT2G29630						115709034	XP_030492926	AT3G57230		115719141	XP_030503934	AT1G76660		115706351	XP_030489834	AT5G12080
				115719261	XP_030504087	AT1G07570						115709035	XP_030492927	AT3G18150		115719171	XP_030503968	AT3G04470		115706367	XP_030489846	AT1G01940
				115719266	XP_030504094	AT5G27290						115709049	XP_030492938	AT3G14470		115719199	XP_030504007	AT5G26940		115706370	XP_030489850	AT3G60900
				115719271	XP_030504103	AT5G36170						115709071	XP_030492963	AT3G14470		115719217	XP_030504031	AT2G47480		115706373	XP_030489853	AT2G45490
				115719274	XP_030504107	AT3G05130						115709085	XP_030492978	AT3G12800		115719243	XP_030504064	AT5G12440		115706380	XP_030489873	AT1G50240
				115719275	XP_030504108	AT5G59520						115709109	XP_030493002	AT5G50740		115719249	XP_030504070	AT1G07880		115706384	XP_030489880	AT1G01470
				115719301	XP_030504142	AT2G32560						115709153	XP_030493047	AT5G45340		115719285	XP_030504123	AT5G27410		115706388	XP_030489885	AT1G72250
				115719302	XP_030504143	AT1G64780						115709154	XP_030493049	AT2G36810		115719287	XP_030504126	AT1G07380		115706393	XP_030489893	AT2G06050
				115719303	XP_030504144	AT5G37360						115709164	XP_030493065	AT1G56130		115719326	XP_030504173	AT2G30060		115706394	XP_030489894	AT2G06050
				115719308	XP_030504150	AT1G56500						115709186	XP_030493093	AT5G41840		115719358	XP_030504222	AT5G26600		115706421	XP_030489927	AT3G61490
				115719351	XP_030504208	AT2G30390						115709188	XP_030493097	AT1G78750		115719362	XP_030504232	AT5G58420		115706418	XP_030489928	AT1G54200
				115719379	XP_030504258	AT2G28800						115709190	XP_030493104	AT3G50710		115719367	XP_030504240	AT5G22650		115706425	XP_030489935	AT5G41460
				115719395	XP_030504290	AT4G25640						115709191	XP_030493105	AT3G50710		115719375	XP_030504253	AT5G41980		115706431	XP_030489942	AT4G27280
				115719427	XP_030504337	AT5G22510						115709193	XP_030493106	AT5G56370		115719381	XP_030504263	AT3G09640		115706438	XP_030489953	AT5G20510
				115719514	XP_030504450	AT5G26670						115709238	XP_030493146	AT5G50400		115719397	XP_030504292	AT3G05330		115706442	XP_030489954	AT4G27090
				115719537	XP_030504479	AT4G01950						115709242	XP_030493149	AT1G79190		115719400	XP_030504295	AT5G23570		115706454	XP_030489967	AT1G01250
				115719559	XP_030504513	AT2G27290						115709252	XP_030493167	AT4G18240		115719406	XP_030504301	AT2G29500		115706476	XP_030489996	AT2G46000
				115719564	XP_030504519	AT3G14470						115709263	XP_030493182	AT1G79180		115719416	XP_030504321	AT5G60400		115706480	XP_030490001	AT2G45970
				115719599	XP_030504557	AT5G01410						115709264	XP_030493183	AT3G07870		115719435	XP_030504347	AT2G26770		115706483	XP_030490004	AT1G01610
				115719612	XP_030504574	AT3G45140						115709282	XP_030493210	AT2G37040		115719441	XP_030504354	AT5G24318		115706491	XP_030490013	AT5G03620
				115719615	XP_030504578	AT3G45140						115709293	XP_030493226	AT2G41700		115719452	XP_030504373	AT5G02970		115706494	XP_030490016	AT5G05940
				115719630	XP_030504599	AT3G47340						115709300	XP_030493237	AT3G43660		115719463	XP_030504384	AT2G30490		115706498	XP_030490022	AT4G10720
				115719712	XP_030504720	AT1G09130						115709308	XP_030493248	AT5G21050		115719474	XP_030504395	AT1G54840		115706518	XP_030490050	AT4G00525
				115719763	XP_030504809	AT2G39730						115709322	XP_030493261	AT5G33320		115719506	XP_030504439	AT5G64440		115706528	XP_030490065	AT3G61250
				115719777	XP_030504850	AT4G38470						115709324	XP_030493263	AT3G52990		115719508	XP_030504443	AT5G12470		115706546	XP_030490087	AT2G45790
				115720381	XP_030505394	AT1G61520						115709345	XP_030493291	AT1G76870		115719534	XP_030504476	AT1G07810		115706548	XP_030490093	AT1G21690
				115720385	XP_030505397	AT5G42200						115709356	XP_030493302	AT1G18670		115719574	XP_030504529	AT5G28830		115706562	XP_030490112	AT5G20110
				115720594	XP_030505601	AT5G20260						115709374	XP_030493322	AT5G62620		115719643	XP_030504620	AT5G37055		115706565	XP_030490114	AT2G46330
				115720621	XP_030505644	AT3G02730						115709383	XP_030493331	AT2G37040		115719657	XP_030504637	AT5G17410		115706572	XP_030490121	AT3G12700
				115720648	XP_030505672	AT1G09340						115709392	XP_030493341	AT2G47500		115719681	XP_030504673	AT3G02740		115706575	XP_030490125	AT4G00752
				115720676	XP_030505703	AT3G45780						115709419	XP_030493379	AT3G18280		115719683	XP_030504675	AT2G28310		115706606	XP_030490173	AT3G10920
				115720677	XP_030505705	AT5G20935						115709434	XP_030493405	AT1G43650		115719696	XP_030504701	AT5G65700		115706609	XP_030490177	AT3G56380
				115720690	XP_030505716	AT5G06480						115709438	XP_030493406	AT2G36910		115719708	XP_030504716	AT5G60460		115706617	XP_030490188	AT5G27260
				115720722	XP_030505749	AT5G08650						115709447	XP_030493419	AT3G14470		115719714	XP_030504759	AT1G78610		115706622	XP_030490193	AT3G12550
				115720743	XP_030505776	AT4G04850						115709448	XP_030493420	AT3G14470		115719737	XP_030504772	AT2G37270		115706629	XP_030490200	AT4G32760
				115720755	XP_030505792	AT3G05410						115709480	XP_030493456	AT2G46080		115719751	XP_030504790	AT1G54990		115706665	XP_030490243	AT3G49940
				115720766	XP_030505803	AT5G19500						115709481	XP_030493457	AT3G14470		115720163	XP_030505180	AT3G08900		115706708	XP_030490281	AT2G39690
				115720784	XP_030505824	AT4G31530						115709482	XP_030493459	AT3G14470		115720436	XP_030505463	AT2G47990		115706715	XP_030490293	AT5G07580
				115720804	XP_030505839	AT3G14470						115709500	XP_030493476	AT3G14470		115720474	XP_030505482	AT2G13600		115706749	XP_030490344	AT5G19290
				115720835	XP_030505882	AT3G14470						115709511	XP_030493487	AT3G14470		115720540	XP_030505544	AT2G25150		115706756	XP_030490349	AT3G52270
				115720837	XP_030505885	AT2G38540						115709537	XP_030493519	AT3G14470		115720574	XP_030505574	AT3G10920		115706772	XP_030490367	AT5G07590
				115720850	XP_030505895	AT1G08380						115709548	XP_030493533	AT2G40540		115720583	XP_030505589	AT4G06599		115706775	XP_030490369	AT1G53520
				115720876	XP_030505934	AT5G27730						115709554	XP_030493542	AT5G63160		115720589	XP_030505595	AT2G37025		115706781	XP_030490375	AT5G13840
				115720918	XP_030505986	AT1G51400						115709564	XP_030493554	AT1G73590		115720590	XP_030505598	AT5G26680		115706782	XP_030490376	AT5G13830
				115720924	XP_030505993	AT2G29650						115709580	XP_030493576	AT1G34270		115720619	XP_030505641	AT1G56210		115706798	XP_030490392	AT4G27280
				115720966	XP_030506048	AT5G49940						115709587	XP_030493579	AT5G53840		115720623	XP_030505646	AT2G26260		115706808	XP_030490408	AT4G37870
				115720991	XP_030506075	AT5G22620						115709595	XP_030493587	AT5G07920		115720702	XP_030505729	AT3G07020		115706834	XP_030490444	AT4G29520
				115721003	XP_030506085	AT3G09600						115709608	XP_030493604	AT1G30330		115720729	XP_030505757	AT1G74520		115706835	XP_030490447	AT2G26180
				115721008	XP_030506092	AT5G18050						115709609	XP_030493605	AT2G30490		115720730	XP_030505758	AT1G69700		115706851	XP_030490468	AT2G40620
				115721056	XP_030506150	AT4G21860						115709614	XP_030493613	AT3G26600		115720753	XP_030505790	AT3G05420		115706861	XP_030490480	AT4G21620
				115721064	XP_030506163	AT4G14880						115709625	XP_030493627	AT3G14470		115720765	XP_030505802	AT1G55650		115706869	XP_030490488	AT5G20860
				115721071	XP_030506176	AT3G47070						115709626	XP_030493628	AT3G14470		115720800	XP_030505837	AT5G60800		115706872	XP_030490490	AT4G16990
				115721166	XP_030506278	AT3G52050						115709629	XP_030493633	AT4G11130		115720881	XP_030505942	AT4G21900		115706896	XP_030490519	AT5G57580
				115721176	XP_030506291	AT5G01720						115709634	XP_030493643	AT2G26730		115721020	XP_030506107	AT4G38830		115706905	XP_030490535	AT4G21490
				115721178	XP_030506293	AT1G75100						115709642	XP_030493659	AT5G40250		115721051	XP_030506142	AT5G59820		115706913	XP_030490541	AT5G11510
				115721180	XP_030506296	AT5G18050						115709658	XP_030493674	AT5G07830		115721057	XP_030506151	AT1G13790		115706914	XP_030490546	AT5G56590
				115721182	XP_030506298	AT1G07010						115709672	XP_030493696	AT1G51200		115721107	XP_030506215	AT3G04720		115706915	XP_030490547	AT4G16447
				115721225	XP_030506341	AT2G30150						115709691	XP_030493717	AT3G62270		115721108	XP_030506216	AT3G55350		115706946	XP_030490586	AT5G05270
				115721231	XP_030506350	AT1G07150						115709692	XP_030493720	AT3G09770		115721191	XP_030506308	AT1G56690		115706950	XP_030490593	AT1G72970
				115721277	XP_030506404	AT3G04870						115709701	XP_030493732	AT1G09890		115721250	XP_030506366	AT5G11340		115706962	XP_030490608	AT5G64140
				115721284	XP_030506411	AT1G50450						115709704	XP_030493736	AT3G14470		115721265	XP_030506389	AT2G29500		115706994	XP_030490647	AT1G72670
				115721294	XP_030506426	AT4G29070						115709717	XP_030493749	AT2G41820		115721280	XP_030506406	AT5G08310		115706999	XP_030490652	AT3G13882
				115721297	XP_030506430	AT2G17650						115709725	XP_030493764	AT3G14470		115721286	XP_030506414	AT1G09190		115707010	XP_030490667	AT2G46210
				115721300	XP_030506433	AT2G27180						115709733	XP_030493778	AT5G42120		115721312	XP_030506446	AT2G31870		115707075	XP_030490770	AT3G47370
				115721304	XP_030506437	AT5G07730						115709741	XP_030493790	AT1G43770		115721318	XP_030506452	AT4G19020		115707091	XP_030490796	AT5G45540
				115721314	XP_030506447	AT5G27390						115709750	XP_030493803	AT5G23050		115721331	XP_030506464	AT3G04710		115707094	XP_030490797	AT1G17430
				115721329	XP_030506460	AT1G65230						115709769	XP_030493834	AT2G36310		115721363	XP_030506508	AT1G60930		115707106	XP_030490814	AT2G26450
				115721350	XP_030506489	AT2G38780						115709768	XP_030493838	AT1G78230		115721388	XP_030506534	AT5G13000		115707118	XP_030490834	AT1G72480
				115721369	XP_030506513	AT5G19850						115709772	XP_030493840	AT5G61430		115721391	XP_030506537	AT1G54840		115707124	XP_030490842	AT3G14110
				115721401	XP_030506546	AT1G02475						115709800	XP_030493879	AT2G41820		115721694	XP_030506619	AT2G05590		115707129	XP_030490846	AT5G66840
				115721402	XP_030506547	AT5G59030						115709813	XP_030493901	AT3G14470		115721700	XP_030506625	AT3G07530		115707135	XP_030490854	AT1G74960
				115721731	XP_030506660	AT5G43850						115709843	XP_030493939	AT5G62680		115721728	XP_030506659	AT4G33170		115707136	XP_030490855	AT1G74960
				115721750	XP_030506684	AT3G14470						115709844	XP_030493940	AT1G18890		115721743	XP_030506674	AT5G05070		115707141	XP_030490866	AT1G54580
				115721847	XP_030506792	AT5G46050						115709845	XP_030493942	AT5G07990		115721778	XP_030506712	AT5G19530		115707151	XP_030490877	AT1G72370
				115721852	XP_030506798	AT1G08810						115709869	XP_030493968	AT5G13080		115721787	XP_030506723	AT1G15520		115707172	XP_030490902	AT3G07960
				115721865	XP_030506817	AT1G64770						115709873	XP_030493975	AT5G19440		115721823	XP_030506763	AT1G65650		115707182	XP_030490920	AT1G53840
				115721871	XP_030506821	AT5G38200						115709879	XP_030493982	AT1G62400		115721830	XP_030506771	AT2G01770		115707185	XP_030490922	AT3G14310
				115721873	XP_030506824	AT2G27190						115709883	XP_030493987	AT2G41740		115721851	XP_030506797	AT1G69700		115707204	XP_030490949	AT1G17260
				115721879	XP_030506838	AT5G16810						115709911	XP_030494027	AT3G57540		115721860	XP_030506808	AT3G22440		115707208	XP_030490953	AT4G13370
				115721916	XP_030506881	AT2G39510						115709916	XP_030494031	AT3G18270		115721863	XP_030506814	AT3G02820		115707221	XP_030490965	AT4G28890
				115721935	XP_030506901	AT3G54700						115709949	XP_030494079	AT2G36330		115721936	XP_030506902	AT5G17800		115707224	XP_030490968	AT4G00820
				115721965	XP_030506947	AT5G07990						115709950	XP_030494080	AT5G39380		115722078	XP_030507057	AT3G22790		115707234	XP_030490979	AT5G23260
				115721985	XP_030506962	AT3G52740						115709962	XP_030494100	AT3G18060		115722084	XP_030507064	AT3G22960		115707236	XP_030490982	AT4G15950
				115722043	XP_030507025	AT4G14480						115709972	XP_030494114	AT5G03170		115722125	XP_030507110	AT5G23395		115707243	XP_030490999	AT5G47770
				115722111	XP_030507092	AT3G63410						115709980	XP_030494123	AT3G14470		115722127	XP_030507116	AT1G78300		115707260	XP_030491023	AT1G55850
				115722134	XP_030507124	AT1G34540						115709983	XP_030494126	AT3G14470		115722159	XP_030507147	AT3G21430		115707266	XP_030491036	AT5G20740
				115722136	XP_030507127	AT1G14550						115709984	XP_030494127	AT5G19440		115722164	XP_030507155	AT1G08820		115707269	XP_030491038	AT5G47630
				115722157	XP_030507151	AT3G22690						115709985	XP_030494129	AT2G15490		115722185	XP_030507179	AT2G01930		115707270	XP_030491039	AT5G47680
				115722189	XP_030507184	AT1G79600						115710014	XP_030494169	AT3G18060		115722200	XP_030507198	AT3G06145		115707277	XP_030491048	AT5G11970
				115722196	XP_030507192	AT5G35630						115710024	XP_030494186	AT1G07710		115722201	XP_030507199	AT2G43320		115707287	XP_030491059	AT1G32583
				115722214	XP_030507219	AT5G44640						115710026	XP_030494187	AT5G03680		115722209	XP_030507210	AT5G43810		115707299	XP_030491072	AT4G17240
				115722227	XP_030507240	AT3G06150						115710041	XP_030494213	AT3G14470		115722212	XP_030507217	AT5G23400		115707301	XP_030491073	AT1G27330
				115722232	XP_030507248	AT3G06850						115710045	XP_030494216	AT3G14470		115722216	XP_030507222	AT2G41350		115707305	XP_030491078	AT5G53280
				115722246	XP_030507261	AT1G64940						115710046	XP_030494217	AT3G14470		115722221	XP_030507231	AT4G16120		115707310	XP_030491083	AT4G16450
				115722248	XP_030507264	AT1G05870						115710044	XP_030494219	AT2G44745		115722230	XP_030507246	AT4G13710		115707323	XP_030491105	AT3G11210
				115722270	XP_030507293	AT5G43750						115710054	XP_030494233	AT5G61140		115722234	XP_030507250	AT4G02340		115707333	XP_030491121	AT3G02870
				115722281	XP_030507307	AT4G15530						115710072	XP_030494250	AT2G01190		115722243	XP_030507258	AT2G43180		115707339	XP_030491129	AT1G17860
				115722323	XP_030507370	AT5G23210						115710080	XP_030494262	AT2G41510		115722247	XP_030507263	AT5G17330		115707340	XP_030491130	AT5G47550
				115722350	XP_030507404	AT4G32700						115710082	XP_030494266	AT3G14470		115722251	XP_030507269	AT5G18170		115707353	XP_030491147	AT4G33160
				115722384	XP_030507447	AT4G14210						115710102	XP_030494294	AT3G14470		115722262	XP_030507283	AT5G18280		115707359	XP_030491154	AT3G07880
				115722394	XP_030507457	AT4G15550						115710103	XP_030494295	AT3G14470		115722271	XP_030507294	AT1G74040		115707360	XP_030491155	AT5G20130
				115722405	XP_030507467	AT3G24140						115710110	XP_030494306	AT5G03990		115722275	XP_030507301	AT1G55020		115707361	XP_030491160	AT5G64980
				115722407	XP_030507469	AT3G23700						115710167	XP_030494366	AT5G02640		115722292	XP_030507320	AT5G14460		115707369	XP_030491174	AT2G20680
				115722431	XP_030507496	AT1G71900						115710189	XP_030494392	AT5G03330		115722296	XP_030507328	AT5G17380		115707370	XP_030491175	AT1G12050
				115722432	XP_030507498	AT1G71900						115710216	XP_030494421	AT3G48310		115722383	XP_030507444	AT5G48570		115707374	XP_030491181	AT3G27200
				115722443	XP_030507513	AT3G05345						115710227	XP_030494435	AT5G61640		115722390	XP_030507452	AT5G07710		115707378	XP_030491189	AT4G22300
				115722444	XP_030507514	AT3G05345						115710234	XP_030494441	AT3G01140		115722391	XP_030507453	AT5G07710		115707380	XP_030491191	AT1G12020
				115722454	XP_030507530	AT4G13830						115710238	XP_030494445	AT3G20860		115722395	XP_030507458	AT4G13940		115707383	XP_030491194	AT4G22290
				115722455	XP_030507531	AT4G13830						115710247	XP_030494464	AT1G21450		115722406	XP_030507468	AT3G23820		115707391	XP_030491207	AT2G15325
				115722476	XP_030507553	AT1G04880						115710258	XP_030494473	AT3G01680		115722438	XP_030507507	AT3G14250		115707393	XP_030491214	AT5G10720
				115722491	XP_030507570	AT1G03130						115710259	XP_030494474	AT1G74790		115722445	XP_030507520	AT2G16980		115707414	XP_030491231	AT3G26040
				115722501	XP_030507583	AT3G02570						115710260	XP_030494475	AT5G63090		115722477	XP_030507554	AT3G58130		115707418	XP_030491236	AT1G11340
				115722553	XP_030507655	AT3G24190						115710276	XP_030494498	AT3G20898		115722490	XP_030507567	AT2G37770		115707429	XP_030491251	AT2G46400
				115722556	XP_030507658	AT3G01440						115710302	XP_030494526	AT5G15240		115722523	XP_030507611	AT5G17920		115707431	XP_030491253	AT1G61680
				115722569	XP_030507671	AT1G48590						115710308	XP_030494536	AT1G70410		115722547	XP_030507646	AT1G67080		115707435	XP_030491255	AT3G13160
				115722596	XP_030507698	AT5G36250						115710327	XP_030494557	AT1G10200		115722563	XP_030507667	AT1G20330		115707440	XP_030491262	AT1G61680
				115722741	XP_030507894	AT5G10695						115710330	XP_030494562	AT3G60240		115722638	XP_030507758	AT1G60710		115707446	XP_030491270	AT4G21270
				115722760	XP_030507923	AT3G14470						115710343	XP_030494574	AT4G31500		115722639	XP_030507759	AT1G60710		115707450	XP_030491275	AT1G78560
				115722761	XP_030507926	AT3G14470						115710354	XP_030494583	AT4G18780		115722645	XP_030507764	AT3G01680		115707458	XP_030491286	AT4G05200
				115722763	XP_030507928	AT3G24190						115710352	XP_030494584	AT4G17080		115722662	XP_030507785	AT1G23050		115707483	XP_030491322	AT5G20740
				115722773	XP_030507942	AT3G06483						115710365	XP_030494595	AT3G48770		115722643	XP_030507791	AT1G03010		115707489	XP_030491327	AT3G13960
				115722778	XP_030507945	AT5G19220						115710391	XP_030494619	AT1G09970		115722692	XP_030507826	AT2G43360		115707488	XP_030491331	AT1G43800
				115722792	XP_030507979	AT1G04420						115710435	XP_030494658	AT1G49920		115722705	XP_030507844	AT3G23940		115707496	XP_030491346	AT3G16240
				115722804	XP_030507990	AT5G18570						115710470	XP_030494691	AT5G27690		115722716	XP_030507861	AT3G02700		115707499	XP_030491352	AT5G62440
				115722853	XP_030508049	AT3G22840						115710473	XP_030494696	AT2G47750		115722735	XP_030507886	AT3G60380		115707507	XP_030491361	AT4G27090
				115722864	XP_030508064	AT1G08570						115710554	XP_030494777	AT5G49660		115722764	XP_030507931	AT5G17770		115707511	XP_030491366	AT3G56400
				115722892	XP_030508108	AT1G34540						115710561	XP_030494784	AT1G09980		115722767	XP_030507933	AT3G16810		115707516	XP_030491374	AT3G43210
				115722900	XP_030508121	AT2G39080						115710575	XP_030494807	AT1G10630		115722780	XP_030507951	AT3G03800		115707537	XP_030491400	AT4G12540
				115722940	XP_030508187	AT5G08410						115710644	XP_030494861	AT1G77120		115722788	XP_030507974	AT2G39050		115707546	XP_030491412	AT2G46400
				115722945	XP_030508194	AT5G19220						115710654	XP_030494870	AT1G75040		115722819	XP_030508009	AT3G16850		115707548	XP_030491416	AT1G16630
				115722960	XP_030508212	AT1G04240						115710739	XP_030494955	AT5G46940		115722833	XP_030508027	AT1G03220		115707554	XP_030491423	AT5G51260
				115722971	XP_030508222	AT3G11920						115710758	XP_030494985	AT3G62270		115722840	XP_030508040	AT2G43180		115707556	XP_030491424	AT1G14520
				115723004	XP_030508259	AT4G15680						115710792	XP_030495003	AT5G06600		115722851	XP_030508045	AT1G68100		115707560	XP_030491429	AT3G08770
				115723009	XP_030508265	AT2G01918						115710810	XP_030495040	AT4G10380		115722909	XP_030508139	AT2G27020		115707570	XP_030491444	AT3G16370
				115723010	XP_030508266	AT3G23920						115710836	XP_030495049	AT1G74770		115722916	XP_030508149	AT4G14723		115707574	XP_030491448	AT3G16370
				115723011	XP_030508267	AT3G23920						115710860	XP_030495078	AT3G60190		115722939	XP_030508186	AT4G02340		115707575	XP_030491449	AT1G14520
				115723019	XP_030508276	AT4G13670						115710887	XP_030495101	AT2G32440		115722950	XP_030508200	AT5G08560		115707587	XP_030491460	AT5G56670
				115723040	XP_030508299	AT5G43630						115710927	XP_030495141	AT1G58370		115722952	XP_030508202	AT5G09500		115707597	XP_030491469	AT4G33355
				115723044	XP_030508305	AT4G02510						115710988	XP_030495197	AT1G77680		115722980	XP_030508232	AT1G55320		115707601	XP_030491473	AT5G12080
				115723046	XP_030508309	AT3G21460						115711003	XP_030495210	AT5G35370		115722986	XP_030508240	AT3G21550		115707607	XP_030491481	AT3G55950
				115723049	XP_030508313	AT5G24860						115711014	XP_030495219	AT1G58340		115722995	XP_030508249	AT1G05460		115707620	XP_030491493	AT4G29410
				115723093	XP_030508371	AT2G02080						115711048	XP_030495246	AT1G22130		115722998	XP_030508255	AT4G31480		115707630	XP_030491506	AT4G00820
				115723113	XP_030508398	AT1G60000						115711101	XP_030495299	AT3G14470		115723018	XP_030508274	AT3G24170		115707629	XP_030491509	AT4G31770
				115723128	XP_030508416	AT3G29170						115711104	XP_030495301	AT3G14470		115723020	XP_030508277	AT4G33280		115707637	XP_030491513	AT1G61480
				115723165	XP_030508457	AT4G14890						115711110	XP_030495306	AT3G14470		115723026	XP_030508283	AT2G20710		115707641	XP_030491520	AT4G21500
				115723219	XP_030508514	AT1G14550						115711109	XP_030495309	AT1G69680		115723029	XP_030508288	AT1G24020		115707660	XP_030491545	AT5G45500
				115723236	XP_030508529	AT4G22920						115711127	XP_030495326	AT5G67300		115723053	XP_030508316	AT3G20015		115707664	XP_030491551	AT1G07570
				115723244	XP_030508545	AT2G23840						115711137	XP_030495335	AT3G53010		115723085	XP_030508361	AT4G14930		115707668	XP_030491554	AT3G55700
				115723263	XP_030508563	AT2G27610						115711150	XP_030495346	AT3G50120		115723121	XP_030508408	AT4G14220		115707673	XP_030491560	AT1G18100
				115723304	XP_030508604	AT1G50320						115711162	XP_030495355	AT2G29420		115723144	XP_030508439	AT1G04520		115707694	XP_030491582	AT5G56590
				115723330	XP_030508622	AT3G54050						115711194	XP_030495381	AT1G27440		115723163	XP_030508456	AT3G22450		115707710	XP_030491599	AT3G17070
				115723332	XP_030508625	AT1G59960						115711233	XP_030495420	AT2G36870		115723189	XP_030508484	AT3G06740		115707713	XP_030491603	AT3G10020
				115723359	XP_030508670	AT1G04620						115711229	XP_030495421	AT1G47128		115723225	XP_030508518	AT3G21465		115707719	XP_030491613	AT2G24970
				115723362	XP_030508673	AT2G40460						115711243	XP_030495435	AT2G37130		115723237	XP_030508532	AT2G02100		115707723	XP_030491615	AT5G53750
				115723389	XP_030508721	AT3G02690						115711246	XP_030495442	AT4G24610		115723265	XP_030508565	AT3G47520		115707732	XP_030491626	AT4G04470
				115723405	XP_030508743	AT3G06500						115711262	XP_030495458	AT2G37040		115723279	XP_030508581	AT5G43420		115707744	XP_030491649	AT1G21750
				115723407	XP_030508745	AT3G06510						115711294	XP_030495490	AT5G03610		115723287	XP_030508586	AT5G18940		115707746	XP_030491650	AT4G22010
				115723417	XP_030508762	AT5G30510						115711295	XP_030495491	AT1G72680		115723293	XP_030508593	AT1G22610		115707758	XP_030491673	AT1G07570
				115723422	XP_030508769	AT2G47180						115711298	XP_030495492	AT5G61340		115723305	XP_030508605	AT4G13540		115707780	XP_030491703	AT4G21820
				115723428	XP_030508774	AT5G28050						115711317	XP_030495515	AT5G13700		115723338	XP_030508641	AT4G03510		115707788	XP_030491716	AT4G04870
				115723429	XP_030508776	AT1G08530						115711333	XP_030495532	AT1G31150		115723341	XP_030508644	AT1G55550		115707805	XP_030491735	AT5G13840
				115723433	XP_030508781	AT1G48320						115711352	XP_030495549	AT3G16510		115723343	XP_030508646	AT1G04760		115707808	XP_030491738	AT1G07070
				115723470	XP_030508822	AT4G03500						115711390	XP_030495580	AT5G03990		115723358	XP_030508669	AT2G01940		115707810	XP_030491739	AT1G75270
				115723625	XP_030508970	AT3G22840						115711364	XP_030495591	AT1G02500		115723368	XP_030508686	AT1G04340		115707811	XP_030491740	AT3G60650
				115723628	XP_030508974	AT4G25130						115711413	XP_030495608	AT5G03530		115723383	XP_030508716	AT3G03980		115707812	XP_030491741	AT4G16480
				115723684	XP_030509026	AT3G57680						115711421	XP_030495614	AT5G62890		115723394	XP_030508727	AT2G36900		115707816	XP_030491749	AT1G11545
				115723856	XP_030509181	ATMG00370						115711424	XP_030495620	AT3G48080		115723401	XP_030508736	AT3G62270		115707820	XP_030491755	AT3G16190
				115724090	XP_030509406	AT3G22840						115711444	XP_030495647	AT5G41040		115723408	XP_030508746	AT3G06440		115707823	XP_030491763	AT5G39350
				115724137	XP_030509464	AT4G14870						115711454	XP_030495657	AT2G37090		115723418	XP_030508763	AT1G48000		115707826	XP_030491765	AT3G16170
				115724169	XP_030509499	AT3G56940						115711457	XP_030495660	AT2G41370		115723458	XP_030508806	AT3G16630		115707829	XP_030491770	AT1G79840
				115724183	XP_030509516	AT5G49360						115711473	XP_030495674	AT1G14920		115723485	XP_030508840	AT3G62830		115707844	XP_030491787	AT3G16120
				115724426	XP_030509571	AT2G19330						115711491	XP_030495690	AT5G03795		115723558	XP_030508908	AT5G57280		115707857	XP_030491803	AT1G79900
				115724470	XP_030509622	AT4G25910						115711537	XP_030495750	AT2G41740		115723623	XP_030508968	AT2G47485		115707858	XP_030491805	AT3G16050
				115724474	XP_030509625	AT3G23760						115711545	XP_030495758	AT1G74360		115724085	XP_030509401	AT5G49460		115707874	XP_030491823	AT1G52500
				115724518	XP_030509675	AT5G58770						115711548	XP_030495760	AT3G48270		115724061	XP_030509410	AT1G02920		115707883	XP_030491834	AT3G18430
				115724539	XP_030509704	AT3G26300						115711554	XP_030495768	AT2G41660		115724123	XP_030509450	AT3G24240		115707884	XP_030491835	AT5G26800
				115724567	XP_030509731	AT2G26580						115711571	XP_030495789	AT4G35550		115724127	XP_030509455	AT4G13710		115707897	XP_030491853	AT5G20710
				115724577	XP_030509755	AT4G19830						115711580	XP_030495802	AT1G20990		115724129	XP_030509457	AT4G13720		115707905	XP_030491860	AT5G13750
				115724588	XP_030509766	AT4G32280						115711591	XP_030495816	AT5G61380		115724139	XP_030509467	AT1G14590		115707918	XP_030491881	AT1G15930
				115724610	XP_030509790	AT5G66520						115711617	XP_030495850	AT3G47510		115724140	XP_030509468	AT5G19090		115707928	XP_030491893	AT1G80860
				115724625	XP_030509815	AT1G52870						115711623	XP_030495859	AT1G77300		115724167	XP_030509496	AT5G13750		115707937	XP_030491907	AT1G66100
				115724641	XP_030509837	AT4G28025						115711627	XP_030495866	AT3G13080		115724192	XP_030509528	AT2G44420		115707950	XP_030491926	AT5G15350
				115724662	XP_030509861	AT2G04039						115711641	XP_030495874	AT4G20140		115724203	XP_030509547	AT3G22540		115707958	XP_030491938	AT5G48930
				115724689	XP_030509888	AT2G47910						115711637	XP_030495875	AT1G76550		115724464	XP_030509615	AT5G48485		115707959	XP_030491939	AT5G48930
				115724694	XP_030509893	AT1G47890						115711659	XP_030495893	AT5G26660		115724509	XP_030509664	AT2G04480		115707961	XP_030491940	AT5G48930
				115724721	XP_030509918	AT4G30845						115711669	XP_030495904	AT3G14470		115724530	XP_030509688	AT3G25290		115707962	XP_030491941	AT5G48930
				115724840	XP_030510057	AT2G24270						115711675	XP_030495909	AT2G27690		115724627	XP_030509817	AT5G56000		115707963	XP_030491942	AT5G48930
				115724871	XP_030510092	AT3G50980						115711722	XP_030495961	AT1G76490		115724658	XP_030509857	AT1G52565		115707982	XP_030491969	AT1G44130
				115724915	XP_030510148	AT4G25310						115711738	XP_030495962	AT1G76460		115724724	XP_030509920	AT5G57420		115707999	XP_030492001	AT5G51560
				115724919	XP_030510151	AT1G50600						115711940	XP_030495997	AT4G37220		115724770	XP_030509975	AT3G43660		115708001	XP_030492003	AT5G08240
				115724944	XP_030510183	AT2G18700						115711946	XP_030496002	AT1G24430		115724804	XP_030510020	AT1G28390		115708004	XP_030492009	AT1G17330
				115724972	XP_030510219	AT4G38970						115711942	XP_030496003	AT2G25790		115724838	XP_030510053	AT1G80710		115708017	XP_030492039	AT4G13030
				115725060	XP_030510336	AT1G60950						115711957	XP_030496017	AT2G31160		115724854	XP_030510076	AT5G62180		115708019	XP_030492040	AT2G43540
				115725061	XP_030510337	AT1G60950						115711961	XP_030496021	AT5G46050		115724883	XP_030510109	AT3G13275		115708021	XP_030492041	AT5G61170
				115725088	XP_030510365	AT2G05160						115711973	XP_030496035	AT4G32860		115724907	XP_030510137	AT4G27290		115708030	XP_030492054	AT5G20860
				115725089	XP_030510372	AT2G39970						115711977	XP_030496037	AT4G36470		115724927	XP_030510162	AT2G19090		115708052	XP_030492083	AT5G39740
				115725109	XP_030510397	AT5G56550						115711993	XP_030496054	AT3G17760		115724959	XP_030510201	AT3G57150		115708056	XP_030492086	AT3G25500
				115725117	XP_030510408	AT4G30950						115712005	XP_030496063	AT1G15080		115724992	XP_030510242	AT5G37990		115708065	XP_030492098	AT4G27810
				115725156	XP_030510447	AT5G35170						115712008	XP_030496071	AT1G70750		115725005	XP_030510262	AT5G46920		115708081	XP_030492119	AT1G53860
				115725165	XP_030510458	AT5G18020						115712018	XP_030496080	AT5G42930		115725009	XP_030510267	AT5G23810		115708082	XP_030492125	AT3G26400
				115725166	XP_030510459	AT4G38840						115712026	XP_030496090	AT3G06910		115725019	XP_030510279	AT3G21240		115708100	XP_030492147	AT5G19740
				115725170	XP_030510463	AT3G07040						115712025	XP_030496092	AT5G49900		115725037	XP_030510309	AT5G56350		115708103	XP_030492154	AT3G03770
				115725225	XP_030510529	AT4G38840						115712033	XP_030496099	AT5G65660		115725045	XP_030510320	AT1G21050		115708117	XP_030492173	AT3G14370
				115725263	XP_030510578	AT1G60950						115712052	XP_030496132	AT4G10310		115725077	XP_030510354	AT1G55360		115708124	XP_030492184	AT5G53390
				115725275	XP_030510590	AT4G02050						115712056	XP_030496137	AT5G49630		115725122	XP_030510412	AT4G27060		115708131	XP_030492189	AT1G61720
				115725293	XP_030510617	AT4G25650						115712070	XP_030496151	AT2G18060		115725285	XP_030510604	AT5G19780		115708148	XP_030492219	AT3G14740
				115725294	XP_030510618	AT4G33500						115712071	XP_030496153	AT3G26300		115725300	XP_030510625	AT5G54670		115708153	XP_030492223	AT1G11600
				115725295	XP_030510619	AT1G15820						115712081	XP_030496170	AT1G68200		115725318	XP_030510656	AT1G55690		115708155	XP_030492225	AT4G00460
				115725305	XP_030510632	AT1G66840						115712115	XP_030496209	AT1G17950		115725349	XP_030510697	AT5G54240		115708168	XP_030492239	AT5G39660
				115725311	XP_030510641	AT3G47650						115712117	XP_030496210	AT2G34930		115725354	XP_030510702	AT2G01070		115708170	XP_030492241	AT3G18830
				115725316	XP_030510653	AT2G21385						115712118	XP_030496211	AT1G70530		115725385	XP_030510758	AT5G49980		115708181	XP_030492250	AT4G35160
				115725330	XP_030510671	AT5G54270						115712124	XP_030496218	AT4G13195		115725401	XP_030510773	AT2G18900		115708201	XP_030492271	AT4G29910
				115725389	XP_030510760	AT4G34740						115712151	XP_030496257	AT4G06536		115725421	XP_030510797	AT1G11260		115708203	XP_030492273	AT5G04840
				115725406	XP_030510780	AT2G31170						115712162	XP_030496269	AT2G23540		115725464	XP_030510855	AT2G01080		115708207	XP_030492278	AT1G16310
				115725411	XP_030510788	AT1G55480						115712166	XP_030496274	AT1G66150		115725469	XP_030510862	AT5G13520		115708208	XP_030492280	AT2G38760
				115725449	XP_030510837	AT2G26670						115712183	XP_030496292	AT4G39410		115725482	XP_030510879	AT1G80530		115708213	XP_030492284	AT3G61110
				115725528	XP_030510943	AT5G54280						115712188	XP_030496297	AT5G13250		115725526	XP_030510940	AT3G24660		115708215	XP_030492290	AT5G07590
				115725546	XP_030510964	AT2G24060						115712193	XP_030496304	AT3G26300		115725596	XP_030511038	AT5G57970		115708226	XP_030492305	AT1G80690
				115725551	XP_030510971	AT4G34770						115712197	XP_030496307	AT5G43180		115725639	XP_030511079	AT2G24230		115708230	XP_030492308	AT5G11590
				115725567	XP_030510996	AT2G26660						115712198	XP_030496308	AT1G70670		115725669	XP_030511113	AT3G20290		115708236	XP_030492314	AT5G04990
				115725600	XP_030511042	AT1G55510						115712206	XP_030496319	AT1G46480		115725691	XP_030511141	AT1G60430		115708237	XP_030492315	AT5G07400
				115725606	XP_030511048	AT3G09310						115712240	XP_030496365	AT1G46264		115725699	XP_030511151	AT4G39150		115708240	XP_030492321	AT1G71695
				115725624	XP_030511066	AT2G18940						115712253	XP_030496368	AT5G24530		115725724	XP_030511179	AT5G42570		115708243	XP_030492323	AT1G72610
				115725651	XP_030511092	AT5G18080						115712267	XP_030496385	AT5G10180		115725732	XP_030511186	AT2G18890		115708244	XP_030492324	AT5G42650
				115725652	XP_030511093	AT5G54290						115712272	XP_030496389	AT1G17840		115725765	XP_030511231	AT1G28490		115708248	XP_030492327	AT4G03965
				115725657	XP_030511102	AT5G55620						115712277	XP_030496401	AT1G28380		115698141	lncRNA			115708249	XP_030492332	AT1G71695
				115725667	XP_030511112	AT3G18110						115712283	XP_030496404	AT2G31280		115707389	lncRNA			115708255	XP_030492336	AT4G04890
				115725682	XP_030511127	AT5G23810						115712335	XP_030496468	AT4G15560		115716786	lncRNA			115708261	XP_030492344	AT4G00170
				115725694	XP_030511144	AT4G03280						115712365	XP_030496493	AT4G36470		115703612	lncRNA			115708262	XP_030492345	AT5G04820
				115725701	XP_030511153	AT4G25650						115712368	XP_030496495	AT4G33450		115721321	lncRNA			115708277	XP_030492363	AT1G16310
				115725738	XP_030511192	AT5G17680						115712419	XP_030496556	AT3G46790		115706672	lncRNA			115708279	XP_030492366	AT5G20110
				115725739	XP_030511194	AT5G17680						115712443	XP_030496578	AT5G14090		115715890	lncRNA			115708280	XP_030492368	AT3G10870
				115725742	XP_030511199	AT5G36930						115712461	XP_030496595	AT1G21280		115705605	lncRNA			115708292	XP_030492380	AT4G03965
				115725787	XP_030511257	AT4G26540						115712504	XP_030496651	AT2G22250		115698239	lncRNA			115708305	XP_030492394	AT3G57060
				115717034	lncRNA							115712512	XP_030496658	AT2G18050		115704705	lncRNA			115708307	XP_030492396	AT2G05540
				115718837	lncRNA							115712528	XP_030496677	AT3G26610		115700871	lncRNA			115708313	XP_030492406	AT4G26260
				115704823	lncRNA							115712569	XP_030496727	AT5G67140		115716921	lncRNA			115708315	XP_030492408	AT3G06730
				115704662	lncRNA							115712572	XP_030496731	AT1G64260		115701541	lncRNA			115708332	XP_030492435	AT3G10870
				115695799	lncRNA							115712577	XP_030496735	AT5G63400		115715796	lncRNA			115708341	XP_030492443	AT3G26040
				115705129	lncRNA							115712585	XP_030496746	AT1G15110		115706669	lncRNA			115708343	XP_030492445	AT3G44540
				115716464	lncRNA							115712608	XP_030496772	AT3G18990		115716173	lncRNA			115708348	XP_030492448	AT3G07940
				115718703	lncRNA							115712620	XP_030496786	AT4G37870		115718859	lncRNA			115708353	XP_030492465	AT3G61110
				115703931	lncRNA							115712621	XP_030496787	AT3G01680		115705208	lncRNA			115708355	XP_030492466	AT3G60650
				115716221	lncRNA							115712640	XP_030496804	AT5G60020		115712670	lncRNA			115708666	XP_030492510	AT3G10310
				115706285	lncRNA							115712644	XP_030496811	AT5G10530		115717763	pseudogene			115708694	XP_030492539	AT4G24790
				115698873	lncRNA							115712646	XP_030496819	AT4G32850		115720969	pseudogene			115708697	XP_030492550	AT5G15230
				115715664	lncRNA							115712658	XP_030496837	AT1G47750		115710841	pseudogene			115708699	XP_030492553	AT2G42260
				115717102	lncRNA							115712668	XP_030496855	AT3G50780		115701296	pseudogene			115708702	XP_030492555	AT2G36290
				115720646	lncRNA							115712688	XP_030496877	AT2G33540		115715722	pseudogene			115708712	XP_030492567	AT5G03790
				115702701	lncRNA							115712690	XP_030496880	AT1G67420		115702409	pseudogene			115708719	XP_030492578	AT1G73830
				115694803	lncRNA							115712696	XP_030496884	AT1G67560		115725422	pseudogene			115708723	XP_030492586	AT5G07010
				115718604	lncRNA							115712694	XP_030496887	AT4G32650		115695448	pseudogene			115708734	XP_030492596	AT1G74080
				115715937	lncRNA							115712703	XP_030496899	AT5G25570		115711134	pseudogene			115708736	XP_030492599	AT5G03040
				115708615	lncRNA							115712724	XP_030496923	AT3G26090		115706801	pseudogene			115708751	XP_030492619	AT2G07050
				115715932	lncRNA							115712727	XP_030496930	AT5G62620		115716258	pseudogene			115708769	XP_030492642	AT5G20110
				115713730	lncRNA							115712743	XP_030496955	AT2G40890		115717597	pseudogene			115708772	XP_030492644	AT5G50400
				115700859	lncRNA							115712761	XP_030496973	AT1G71010		115722467	pseudogene			115708775	XP_030492647	AT3G48460
				115703153	lncRNA							115712763	XP_030496976	AT3G01680		115711372	pseudogene			115708749	XP_030492650	AT3G62370
				115705083	lncRNA							115712764	XP_030496977	AT3G26300		115702954	pseudogene			115708786	XP_030492655	AT2G42260
				115704363	lncRNA							115712775	XP_030496993	AT5G42180		115704184	pseudogene			115708787	XP_030492656	AT3G48520
				115708984	lncRNA							115712786	XP_030497004	AT1G59960		115722439	pseudogene			115708804	XP_030492678	AT3G12870
				115723440	lncRNA							115712787	XP_030497006	AT1G59960		115707862	pseudogene			115708815	XP_030492693	AT5G50870
				115703636	lncRNA							115712788	XP_030497007	AT1G59960		115700358	pseudogene			115708833	XP_030492712	AT5G50670
				115706596	lncRNA							115712797	XP_030497024	AT4G39720		115694785	pseudogene			115708847	XP_030492726	AT5G50670
				115725420	pseudogene							115712798	XP_030497025	AT1G70520		115714775	pseudogene			115708850	XP_030492732	AT5G08120
				115699215	pseudogene							115712799	XP_030497029	AT1G60800		115708993	pseudogene			115708858	XP_030492735	AT3G05975
				115704237	pseudogene							115712804	XP_030497036	AT4G34100		115699188	pseudogene			115708859	XP_030492736	AT5G03120
				115724507	pseudogene							115712813	XP_030497051	AT1G27100		115710791	pseudogene			115708862	XP_030492738	AT2G36885
				115710567	pseudogene							115712837	XP_030497085	AT3G16620		115704287	pseudogene			115708871	XP_030492746	AT3G10020
				115705055	pseudogene							115712839	XP_030497088	AT1G23820		115703058	pseudogene			115708875	XP_030492750	AT3G63530
				115724727	pseudogene							115712851	XP_030497102	AT5G10200		115716388	pseudogene			115708878	XP_030492753	AT5G40010
				115720566	pseudogene							115712852	XP_030497104	AT1G24030		115695711	pseudogene			115708883	XP_030492757	AT2G47140
				115723976	pseudogene							115712861	XP_030497124	AT4G36220		115720175	pseudogene			115708898	XP_030492781	AT3G01280
				115714886	pseudogene							115712877	XP_030497151	AT5G44070		115725640	pseudogene			115708921	XP_030492806	AT3G12880
				115704834	pseudogene							115712910	XP_030497193	AT5G65380		115700411	pseudogene			115708923	XP_030492809	AT1G24440
				115706753	pseudogene							115712930	XP_030497221	AT1G28220		115715211	pseudogene			115708933	XP_030492819	AT3G14470
				115706752	pseudogene							115712939	XP_030497232	AT1G28220		115720849	pseudogene			115708941	XP_030492828	AT5G19440
				115703565	pseudogene							115712971	XP_030497275	AT1G67980		115706768	pseudogene			115708958	XP_030492842	AT1G75040
				115717146	pseudogene							115712977	XP_030497286	AT5G63770		115695825	pseudogene			115708976	XP_030492855	AT3G12170
				115696801	pseudogene							115712979	XP_030497290	AT1G16860		115714980	pseudogene			115708982	XP_030492860	AT2G41450
				115697621	pseudogene							115712993	XP_030497314	AT3G01680		115722801	pseudogene			115708988	XP_030492867	AT5G50200
				115704068	pseudogene							115713008	XP_030497330	AT1G15020		115720114	pseudogene			115708989	XP_030492868	AT2G37300
				115715676	pseudogene							115713012	XP_030497337	AT3G01680		115713267	pseudogene			115708990	XP_030492869	AT2G27140
				115713390	pseudogene							115713020	XP_030497350	AT3G19450		115703572	pseudogene			115708992	XP_030492871	AT3G14460
				115717089	pseudogene							115713003	XP_030497366	AT2G47020		115703118	pseudogene			115708997	XP_030492876	AT2G41450
				115713180	pseudogene							115713064	XP_030497404	AT4G37560		115725362	pseudogene			115709006	XP_030492886	AT5G66730
				115695443	pseudogene							115713069	XP_030497414	AT1G43700		115703684	pseudogene			115709017	XP_030492897	AT3G52770
				115709411	pseudogene							115713181	XP_030497526	AT2G16980		115721760	pseudogene			115709018	XP_030492901	AT3G02310
				115710781	pseudogene							115713214	XP_030497557	AT5G44820		115715806	pseudogene			115709042	XP_030492931	AT3G48280
				115707399	pseudogene							115713399	XP_030497746	AT4G10810		115715814	pseudogene			115709066	XP_030492959	AT5G40010
				115712623	pseudogene							115713438	XP_030497781	AT1G23170		115708973	transcribed_pseudogene			115709095	XP_030492994	AT5G27670
				115716083	pseudogene							115713472	XP_030497818	AT1G65550						115709102	XP_030492997	AT3G17790
				115699990	pseudogene							115713475	XP_030497832	AT1G02520						115709113	XP_030493007	AT5G50810
				115703911	pseudogene							115713490	XP_030497835	AT1G27461						115709120	XP_030493017	AT1G29050
				115716978	pseudogene							115713493	XP_030497838	AT5G67590						115709170	XP_030493070	AT1G56130
				115709848	pseudogene							115713575	XP_030497922	AT4G37670						115709201	XP_030493120	AT1G21090
				115712096	pseudogene							115713651	XP_030497999	AT5G67360						115709204	XP_030493122	AT5G27670
				115708511	snoRNA							115713728	XP_030498070	AT3G51325						115709205	XP_030493123	AT5G27670
				115708510	snoRNA							115713740	XP_030498080	AT5G67500						115709206	XP_030493125	AT5G27670
				115711840	snoRNA							115713766	XP_030498112	AT1G76360						115709207	XP_030493126	AT5G27670
				115711839	snoRNA							115713783	XP_030498127	AT4G35090						115709213	XP_030493130	AT2G36620
				115711845	snoRNA							115713840	XP_030498187	AT5G03650						115709214	XP_030493131	AT2G36620
				115711843	snoRNA							115713917	XP_030498257	AT1G67510						115709215	XP_030493132	AT2G36620
				115711842	snoRNA							115713937	XP_030498287	AT1G76250						115709235	XP_030493142	AT2G07170
				115715485	snoRNA							115713943	XP_030498290	AT5G10560						115709258	XP_030493174	AT2G35140
				115696206	tRNA							115713958	XP_030498308	AT3G01680						115709271	XP_030493191	AT4G18910
				115711893	tRNA							115713992	XP_030498355	AT1G04120						115709296	XP_030493230	AT1G55020
				115703531	tRNA							115714007	XP_030498367	AT3G17380						115709304	XP_030493238	AT5G13710
				115724416	tRNA							115714011	XP_030498372	AT5G49720						115709311	XP_030493246	AT5G03820
				115711908	tRNA							115714025	XP_030498397	AT4G36990						115709313	XP_030493250	AT5G07990
				115711907	tRNA							115714029	XP_030498401	AT4G13630						115709397	XP_030493349	AT3G52890
				115701795	tRNA							115714037	XP_030498417	AT1G20440						115709405	XP_030493362	AT3G63520
				115703511	tRNA							115714043	XP_030498421	AT2G18160						115709409	XP_030493368	AT1G62440
				115711912	tRNA							115714067	XP_030498461	AT4G29900						115709412	XP_030493370	AT4G24780
												115714126	XP_030498543	AT5G65210						115709418	XP_030493378	AT1G18370
												115714130	XP_030498551	AT2G21610						115709424	XP_030493385	AT3G23890
												115714133	XP_030498553	AT1G23380						115709431	XP_030493401	AT3G57490
												115714137	XP_030498558	AT1G27920						115709439	XP_030493408	AT5G10360
												115714144	XP_030498567	AT5G24740						115709440	XP_030493409	AT5G50400
												115714152	XP_030498581	AT2G32720						115709441	XP_030493410	AT3G48540
												115714158	XP_030498586	AT3G10700						115709442	XP_030493411	AT5G50400
												115714168	XP_030498596	AT1G77120						115709461	XP_030493435	AT5G50400
												115714172	XP_030498603	AT5G14450						115709468	XP_030493443	AT3G09640
												115714184	XP_030498623	AT1G53470						115709471	XP_030493447	AT3G14460
												115714204	XP_030498651	AT4G02590						115709473	XP_030493451	AT2G36850
												115714206	XP_030498659	AT4G38470						115709512	XP_030493491	AT2G26250
												115714217	XP_030498669	AT3G12500						115709529	XP_030493509	AT1G72370
												115714232	XP_030498709	AT1G13190						115709566	XP_030493556	AT3G18000
												115714235	XP_030498719	AT1G24575						115709568	XP_030493559	AT1G48580
												115714240	XP_030498725	AT1G71140						115709592	XP_030493583	AT1G56130
												115714244	XP_030498730	AT5G44030						115709593	XP_030493584	AT5G04060
												115714259	XP_030498749	AT1G27200						115709596	XP_030493590	AT1G56130
												115714286	XP_030498792	AT1G10350						115709616	XP_030493615	AT5G50400
												115714293	XP_030498798	AT2G17940						115709619	XP_030493618	AT1G74110
												115714314	XP_030498830	AT4G35030						115709624	XP_030493626	AT5G50400
												115714360	XP_030498896	AT5G57130						115709657	XP_030493673	AT3G57490
												115714376	XP_030498919	AT5G64530						115709667	XP_030493686	AT1G18650
												115714380	XP_030498927	AT1G78720						115709668	XP_030493688	AT3G08030
												115714395	XP_030498942	AT4G36630						115709687	XP_030493714	AT3G48190
												115714400	XP_030498949	AT2G18470						115709693	XP_030493721	AT1G16670
												115714404	XP_030498954	AT5G66770						115709706	XP_030493740	AT5G64660
												115714408	XP_030498966	AT4G36710						115709720	XP_030493756	AT1G78790
												115714441	XP_030499015	AT1G75080						115709743	XP_030493787	AT2G37080
												115714447	XP_030499021	AT1G19480						115709744	XP_030493792	AT5G13450
												115714468	XP_030499051	AT3G50845						115709751	XP_030493806	AT5G23050
												115714469	XP_030499052	AT5G66780						115709763	XP_030493831	AT5G27820
												115714498	XP_030499084	AT1G73370						115709775	XP_030493843	AT1G70140
												115714513	XP_030499099	AT3G28455						115709783	XP_030493852	AT2G36350
												115714514	XP_030499101	AT5G49555						115709786	XP_030493857	AT3G52960
												115714543	XP_030499136	AT3G07340						115709797	XP_030493873	AT2G37220
												115714545	XP_030499139	AT1G23890						115709806	XP_030493890	AT3G57400
												115714548	XP_030499145	AT1G28200						115709826	XP_030493920	AT1G18800
												115714556	XP_030499151	AT1G13130						115709828	XP_030493923	AT3G48730
												115714563	XP_030499160	AT5G60200						115709841	XP_030493941	AT5G43020
												115714582	XP_030499183	AT1G17100						115709862	XP_030493953	AT2G37040
												115714588	XP_030499189	AT5G67480						115709888	XP_030493997	AT4G16970
												115714620	XP_030499225	AT1G78950						115709892	XP_030494000	AT3G14470
												115714651	XP_030499261	AT4G33985						115709902	XP_030494014	AT3G18080
												115714665	XP_030499277	AT2G41420						115709903	XP_030494016	AT3G18080
												115714681	XP_030499293	AT3G07340						115709907	XP_030494020	AT1G74680
												115714683	XP_030499298	AT3G18660						115709912	XP_030494028	AT5G17990
												115714703	XP_030499319	AT3G20250						115709933	XP_030494056	AT5G07990
												115714706	XP_030499326	AT5G67470						115709956	XP_030494092	AT3G52870
												115714708	XP_030499328	AT3G12500						115709957	XP_030494093	AT5G24850
												115714735	XP_030499351	AT5G49760						115709961	XP_030494098	AT3G52870
												115714737	XP_030499353	AT5G48800						115709974	XP_030494116	AT4G37110
												115714742	XP_030499358	AT5G50200						115709999	XP_030494146	AT1G18370
												115714772	XP_030499386	AT4G15570						115710021	XP_030494180	AT3G09730
												115714773	XP_030499387	AT1G70780						115710028	XP_030494188	AT5G22850
												115714782	XP_030499395	AT3G10380						115710036	XP_030494199	AT3G49010
												115714792	XP_030499403	AT1G24430						115710038	XP_030494204	AT3G53180
												115714870	XP_030499493	AT1G67410						115710060	XP_030494239	AT3G48250
												115714874	XP_030499496	AT5G67620						115710062	XP_030494240	AT4G24710
												115714883	XP_030499504	AT4G40080						115710061	XP_030494243	AT2G44740
												115714891	XP_030499510	AT5G48740						115710070	XP_030494252	AT3G27200
												115714900	XP_030499516	AT1G53050						115710078	XP_030494264	AT2G34480
												115714911	XP_030499529	AT2G13680						115710084	XP_030494268	AT2G41540
												115714912	XP_030499530	AT1G70260						115710085	XP_030494270	AT2G41540
												115714941	XP_030499566	AT1G70530						115710100	XP_030494293	AT3G57240
												115714957	XP_030499580	AT5G66600						115710104	XP_030494296	AT3G57260
												115714958	XP_030499581	AT5G17680						115710077	XP_030494297	AT2G47240
												115714966	XP_030499592	AT4G38050						115710112	XP_030494307	AT3G57280
												115714975	XP_030499606	AT3G57810						115710121	XP_030494320	AT4G20990
												115714978	XP_030499612	AT4G18530						115710122	XP_030494321	AT5G65360
												115714982	XP_030499617	AT2G21660						115710127	XP_030494327	AT5G65360
												115714988	XP_030499628	AT1G67570						115710128	XP_030494328	AT5G65360
												115714992	XP_030499631	AT4G31940						115710129	XP_030494329	AT5G65360
												115715000	XP_030499642	AT1G68390						115710150	XP_030494345	AT5G42800
												115715012	XP_030499651	AT5G48660						115710152	XP_030494347	AT5G62550
												115715013	XP_030499652	AT3G02600						115710162	XP_030494357	AT1G77260
												115715031	XP_030499674	AT1G10760						115710163	XP_030494358	AT2G44860
												115715032	XP_030499675	AT3G50370						115710174	XP_030494376	AT3G16150
												115715043	XP_030499694	AT2G26560						115710195	XP_030494398	AT3G07970
												115715063	XP_030499717	AT1G16800						115710201	XP_030494409	AT3G30180
												115715083	XP_030499741	AT5G65000						115710205	XP_030494411	AT1G74670
												115715093	XP_030499753	AT4G01020						115710210	XP_030494415	AT2G28305
												115715094	XP_030499754	AT2G46550						115710217	XP_030494422	AT5G63400
												115715098	XP_030499759	AT3G13060						115710221	XP_030494427	AT3G42660
												115715105	XP_030499770	AT3G50380						115710224	XP_030494432	AT1G74670
												115715113	XP_030499782	AT5G13330						115710226	XP_030494434	AT5G50260
												115715116	XP_030499787	AT1G67400						115710231	XP_030494439	AT5G62520
												115715117	XP_030499789	AT2G20320						115710251	XP_030494466	AT5G08020
												115715125	XP_030499798	AT5G40460						115710255	XP_030494469	AT2G37420
												115715131	XP_030499804	AT3G50930						115710266	XP_030494485	AT5G08100
												115715143	XP_030499819	AT5G01930						115710269	XP_030494490	AT2G43000
												115715146	XP_030499826	AT1G24430						115710309	XP_030494537	AT5G13790
												115715149	XP_030499829	AT3G26300						115710311	XP_030494538	AT3G02560
												115715155	XP_030499836	AT2G22570						115710321	XP_030494548	AT5G50790
												115715163	XP_030499843	AT1G23340						115710333	XP_030494561	AT5G63310
												115715175	XP_030499866	AT2G03200						115710334	XP_030494563	AT3G48490
												115715193	XP_030499883	AT1G78950						115710361	XP_030494590	AT4G37320
												115715240	XP_030499938	AT1G54560						115710452	XP_030494677	AT5G59850
												115715251	XP_030499953	AT4G35900						115710511	XP_030494757	AT5G19730
												115715253	XP_030499954	AT3G50310						115710699	XP_030494911	AT3G60220
												115715275	XP_030499981	AT2G36870						115710707	XP_030494921	AT1G02180
												115715284	XP_030499991	AT4G35880						115710712	XP_030494930	AT3G60210
												115715324	XP_030500042	AT3G50410						115710723	XP_030494940	AT3G57560
												115715331	XP_030500050	AT1G09610						115710728	XP_030494945	AT5G25580
												115715338	XP_030500058	AT1G23530						115710734	XP_030494949	AT2G44640
												115715577	XP_030500072	AT5G53460						115710928	XP_030495139	AT3G55280
												115715581	XP_030500076	AT4G18020						115710955	XP_030495163	AT2G41830
												115715589	XP_030500089	AT5G54130						115711038	XP_030495238	AT5G11260
												115715601	XP_030500106	AT3G03050						115711061	XP_030495260	AT1G47230
												115715608	XP_030500109	AT1G32900						115711044	XP_030495265	AT2G47115
												115715620	XP_030500136	AT4G12300						115711082	XP_030495280	AT1G47200
												115715621	XP_030500137	AT2G46680						115711111	XP_030495307	AT2G41620
												115715622	XP_030500138	AT5G52870						115711171	XP_030495361	AT1G19880
												115715626	XP_030500144	AT5G53130						115711173	XP_030495363	AT5G66980
												115715629	XP_030500147	AT4G24015						115711195	XP_030495382	AT3G18200
												115715635	XP_030500153	AT5G24655						115711214	XP_030495405	AT1G60060
												115715642	XP_030500162	AT1G63910						115711222	XP_030495411	AT5G13490
												115715647	XP_030500167	AT4G12300						115711240	XP_030495432	AT4G00100
												115715648	XP_030500169	AT4G10720						115711250	XP_030495446	AT3G51970
												115715659	XP_030500177	AT2G45550						115711257	XP_030495455	AT2G36770
												115715660	XP_030500178	AT4G27745						115711261	XP_030495457	AT5G15740
												115715663	XP_030500182	AT5G53730						115711305	XP_030495505	AT5G65420
												115715666	XP_030500184	AT4G24060						115711324	XP_030495523	AT3G47710
												115715673	XP_030500191	AT1G63910						115711328	XP_030495527	AT3G49010
												115715684	XP_030500202	AT5G09810						115711368	XP_030495562	AT4G00100
												115715690	XP_030500210	AT4G24050						115711381	XP_030495574	AT5G37630
												115715721	XP_030500248	AT5G42210						115711394	XP_030495583	AT5G60830
												115715726	XP_030500253	AT5G49610						115711399	XP_030495590	AT3G14470
												115715730	XP_030500257	AT1G32100						115711400	XP_030495593	AT1G13230
												115715736	XP_030500263	AT1G33060						115711443	XP_030495646	AT3G52940
												115715739	XP_030500265	AT1G12260						115711453	XP_030495656	AT5G50170
												115715753	XP_030500284	AT5G02890						115711461	XP_030495663	AT1G20050
												115715756	XP_030500288	AT1G12380						115711462	XP_030495664	AT2G28420
												115715760	XP_030500291	AT2G45040						115711482	XP_030495681	AT5G08180
												115715767	XP_030500300	AT5G41860						115711486	XP_030495685	AT1G67430
												115715778	XP_030500311	AT5G46720						115711493	XP_030495693	AT1G69170
												115715792	XP_030500324	AT2G38600						115711509	XP_030495715	AT1G18550
												115715808	XP_030500339	AT2G38600						115711516	XP_030495730	AT2G36780
												115715809	XP_030500340	AT4G20850						115711523	XP_030495734	AT3G48280
												115715828	XP_030500356	AT4G17980						115711534	XP_030495746	AT1G14700
												115715831	XP_030500358	AT5G37600						115711535	XP_030495747	AT2G37260
												115715847	XP_030500377	AT4G17800						115711569	XP_030495783	AT5G53140
												115715848	XP_030500378	AT2G35350						115711588	XP_030495812	AT3G57800
												115715855	XP_030500381	AT2G39900						115711605	XP_030495833	AT2G15490
												115715863	XP_030500391	AT3G60320						115711624	XP_030495860	AT2G35605
												115715871	XP_030500401	AT5G26230						115711636	XP_030495872	AT4G00100
												115715881	XP_030500413	AT4G10540						115711646	XP_030495878	AT4G37690
												115715886	XP_030500422	AT5G24270						115711658	XP_030495890	AT2G36780
												115715893	XP_030500429	AT1G24430						115711663	XP_030495897	AT2G37020
												115715918	XP_030500454	AT1G69230						115711665	XP_030495903	AT1G76540
												115715921	XP_030500458	AT2G30590						115711679	XP_030495916	AT3G63520
												115715922	XP_030500459	AT5G24350						115711685	XP_030495924	AT3G09890
												115715931	XP_030500473	AT1G31490						115711687	XP_030495926	AT5G07690
												115715950	XP_030500488	AT5G53110						115711689	XP_030495931	AT3G52820
												115715966	XP_030500504	AT1G52540						115711699	XP_030495940	AT3G53450
												115715971	XP_030500510	AT5G46570						115711701	XP_030495944	AT3G10310
												115715978	XP_030500516	AT2G32440						115711706	XP_030495953	AT3G52040
												115715948	XP_030500518	AT2G15760						115711919	XP_030495974	AT3G29635
												115715987	XP_030500530	AT1G35910						115711930	XP_030495984	AT2G01275
												115715998	XP_030500545	AT5G52882						115711933	XP_030495989	AT2G23690
												115716006	XP_030500553	AT3G48990						115711949	XP_030496008	AT3G25980
												115716024	XP_030500572	AT1G32450						115711950	XP_030496009	AT1G50640
												115716046	XP_030500602	AT4G17770						115711953	XP_030496011	AT3G48270
												115716058	XP_030500616	AT3G49490						115711958	XP_030496018	AT3G12500
												115716073	XP_030500636	AT1G22930						115711964	XP_030496024	AT3G21470
												115716074	XP_030500638	AT5G12330						115711969	XP_030496029	AT1G27880
												115716091	XP_030500663	AT4G17140						115711970	XP_030496030	AT2G14960
												115716109	XP_030500691	AT1G32740						115711984	XP_030496048	AT4G24660
												115716111	XP_030500730	AT4G02600						115711996	XP_030496055	AT2G17710
												115716138	XP_030500733	AT3G24090						115711998	XP_030496057	AT3G18990
												115716141	XP_030500738	AT5G41610						115712019	XP_030496082	AT2G43130
												115716164	XP_030500770	AT2G46150						115712021	XP_030496084	AT5G66410
												115716166	XP_030500772	AT4G23690						115712039	XP_030496107	AT1G70350
												115716182	XP_030500781	AT4G23895						115712043	XP_030496113	AT3G25400
												115716186	XP_030500789	AT4G10540						115712047	XP_030496115	AT1G75900
												115716205	XP_030500807	AT5G24320						115712051	XP_030496131	AT2G23530
												115716206	XP_030500808	AT5G24470						115712059	XP_030496136	AT1G60060
												115716224	XP_030500835	AT1G17020						115712066	XP_030496143	AT2G02850
												115716225	XP_030500836	AT1G17020						115712076	XP_030496163	AT1G61700
												115716248	XP_030500867	AT4G20850						115712084	XP_030496175	AT1G72390
												115716260	XP_030500878	AT3G59140						115712087	XP_030496177	AT1G24260
												115716263	XP_030500882	AT1G32240						115712099	XP_030496191	AT4G29020
												115716278	XP_030500897	AT4G22540						115712107	XP_030496203	AT3G25100
												115716286	XP_030500907	AT1G62710						115712114	XP_030496208	AT5G51810
												115716289	XP_030500911	AT4G12350						115712123	XP_030496217	AT5G48870
												115716302	XP_030500923	AT2G45180						115712126	XP_030496220	AT5G48870
												115716311	XP_030500930	AT3G55830						115712142	XP_030496245	AT1G08490
												115716348	XP_030500984	AT4G17260						115712145	XP_030496247	AT5G13220
												115716351	XP_030500988	AT4G17950						115712149	XP_030496252	AT5G24530
												115716365	XP_030501006	AT5G24620						115712153	XP_030496255	AT1G67370
												115716367	XP_030501009	AT5G54160						115712155	XP_030496259	AT2G26470
												115716377	XP_030501022	AT4G11670						115712163	XP_030496270	AT4G09460
												115716392	XP_030501038	AT4G17570						115712176	XP_030496286	AT1G28130
												115716399	XP_030501044	AT1G49340						115712194	XP_030496305	AT3G55090
												115716411	XP_030501056	AT5G53110						115712201	XP_030496311	AT3G59880
												115716438	XP_030501092	AT3G61490						115712211	XP_030496321	AT3G49650
												115716423	XP_030501110	AT2G38820						115712222	XP_030496340	AT1G50010
												115716454	XP_030501119	AT2G46500						115712225	XP_030496346	AT3G49680
												115716457	XP_030501125	AT4G15800						115712228	XP_030496351	AT5G67020
												115716467	XP_030501133	AT1G31480						115712231	XP_030496357	AT1G45688
												115716475	XP_030501143	AT5G61760						115712238	XP_030496362	AT4G37810
												115716516	XP_030501190	AT1G79420						115712261	XP_030496378	AT1G01630
												115716560	XP_030501237	AT5G53420						115712264	XP_030496380	AT1G78990
												115716563	XP_030501240	AT5G17165						115712274	XP_030496392	AT1G18010
												115716581	XP_030501269	AT5G17600						115712289	XP_030496410	AT3G26120
												115716669	XP_030501379	AT4G23050						115712311	XP_030496431	AT4G32940
												115716715	XP_030501450	AT4G11650						115712328	XP_030496463	AT1G49780
												115716720	XP_030501456	AT4G10850						115712331	XP_030496465	AT4G03270
												115716727	XP_030501467	AT5G47450						115712336	XP_030496469	AT5G50260
												115716755	XP_030501511	AT1G63440						115712349	XP_030496480	AT1G06620
												115716776	XP_030501535	AT1G33055						115712352	XP_030496483	AT3G18990
												115716830	XP_030501599	AT1G63410						115712367	XP_030496497	AT3G03773
												115716853	XP_030501618	AT1G66910						115712374	XP_030496501	AT5G49665
												115716855	XP_030501620	AT1G66920						115712377	XP_030496504	AT4G18750
												115716856	XP_030501621	AT1G66910						115712379	XP_030496508	AT3G26935
												115716864	XP_030501628	AT5G52660						115712381	XP_030496513	AT3G29670
												115716842	XP_030501638	AT4G35987						115712382	XP_030496514	AT3G12500
												115716889	XP_030501664	AT5G24010						115712385	XP_030496516	AT1G68320
												115716920	XP_030501701	AT5G26170						115712386	XP_030496519	AT3G29635
												115716923	XP_030501704	AT4G11780						115712389	XP_030496521	AT3G29635
												115716937	XP_030501725	AT4G17050						115712414	XP_030496548	AT4G21865
												115716955	XP_030501743	AT5G53486						115712416	XP_030496550	AT5G66360
												115717024	XP_030501815	AT3G18990						115712428	XP_030496562	AT4G37580
												115717082	XP_030501880	AT3G49300						115712431	XP_030496566	AT4G37070
												115717083	XP_030501881	AT4G16820						115712442	XP_030496574	AT3G18990
												115717094	XP_030501893	AT4G24120						115712453	XP_030496586	AT1G68530
												115717098	XP_030501902	AT4G12430						115712472	XP_030496608	AT1G23420
												115717108	XP_030501911	AT3G60320						115712473	XP_030496609	AT1G10657
												115717110	XP_030501914	AT4G27950						115712477	XP_030496616	AT1G71140
												115717120	XP_030501925	AT1G71380						115712494	XP_030496636	AT4G36970
												115717130	XP_030501938	AT5G49690						115712498	XP_030496645	AT1G27330
												115717136	XP_030501947	AT1G32690						115712505	XP_030496652	AT1G57820
												115717176	XP_030501988	AT1G63410						115712507	XP_030496654	AT3G25882
												115717193	XP_030502013	AT5G51670						115712518	XP_030496665	AT1G70210
												115717210	XP_030502032	AT1G02260						115712524	XP_030496675	AT1G71770
												115717229	XP_030502061	AT5G47580						115712529	XP_030496678	AT1G68480
												115717240	XP_030502073	AT2G44880						115712533	XP_030496686	AT1G71760
												115717256	XP_030502086	AT2G46770						115712542	XP_030496693	AT5G66310
												115717273	XP_030502101	AT1G12600						115712567	XP_030496724	AT5G67150
												115717287	XP_030502116	AT1G63310						115712570	XP_030496729	AT4G00120
												115717320	XP_030502150	AT4G10850						115712575	XP_030496733	AT2G22170
												115717334	XP_030502166	AT1G31440						115712592	XP_030496754	AT2G21790
												115717344	XP_030502174	AT1G63120						115712602	XP_030496765	AT1G67980
												115717368	XP_030502196	AT4G16600						115712603	XP_030496767	AT1G67980
												115717376	XP_030502204	AT5G41790						115712625	XP_030496788	AT5G49160
												115717384	XP_030502214	AT1G67940						115712631	XP_030496794	AT1G60420
												115717412	XP_030502238	AT3G60190						115712633	XP_030496797	AT1G60420
												115717427	XP_030502273	AT3G26330						115712639	XP_030496805	AT5G36910
												115717430	XP_030502277	AT4G24010						115712641	XP_030496806	AT1G33140
												115717521	XP_030502367	AT3G26040						115712701	XP_030496893	AT5G10010
												115717608	XP_030502451	AT2G28940						115712721	XP_030496924	AT2G25690
												115717628	XP_030502472	AT4G17900						115712726	XP_030496928	AT5G55850
												115717774	XP_030502609	AT5G24318						115712735	XP_030496946	AT1G10070
												115717827	XP_030502658	AT4G01860						115712746	XP_030496958	AT5G67360
												115717863	XP_030502694	AT4G19950						115712790	XP_030497012	AT1G17880
												115717901	XP_030502730	AT1G64065						115712791	XP_030497013	AT5G66560
												115717939	XP_030502768	AT5G40940						115712805	XP_030497038	AT3G25900
												115717986	XP_030502816	AT2G45180						115712810	XP_030497048	AT5G35360
												115718012	XP_030502841	AT4G19050						115712815	XP_030497054	AT5G13870
												115718020	XP_030502850	AT5G12080						115712817	XP_030497060	AT1G58440
												115718158	XP_030502978	AT2G45550						115712827	XP_030497076	AT2G21870
												115718161	XP_030502980	AT2G46690						115712828	XP_030497077	AT2G22240
												115718180	XP_030503003	AT2G26160						115712829	XP_030497078	AT2G22560
												115718167	XP_030503010	AT1G03060						115712832	XP_030497084	AT4G07960
												115718403	XP_030503034	AT2G29410						115712842	XP_030497094	AT2G22840
												115718414	XP_030503051	AT5G58860						115712849	XP_030497099	AT4G37980
												115718430	XP_030503069	AT1G08800						115712858	XP_030497118	AT4G13040
												115718433	XP_030503072	AT5G60720						115712860	XP_030497123	AT1G24020
												115718445	XP_030503086	AT4G27290						115712864	XP_030497128	AT1G70370
												115718447	XP_030503089	AT4G10500						115712867	XP_030497132	AT4G28570
												115718454	XP_030503099	AT3G62550						115712870	XP_030497137	AT1G04430
												115718461	XP_030503105	AT1G47570						115712882	XP_030497156	AT4G28590
												115718462	XP_030503106	AT1G20480						115712902	XP_030497176	AT3G19200
												115718463	XP_030503108	AT2G37390						115712905	XP_030497178	AT4G35920
												115718467	XP_030503111	AT2G37310						115712911	XP_030497190	AT5G36110
												115718471	XP_030503116	AT5G03170						115712923	XP_030497201	AT3G17760
												115718479	XP_030503128	AT3G08510						115712924	XP_030497202	AT3G17760
												115718511	XP_030503169	AT1G08320						115712932	XP_030497220	AT4G12910
												115718515	XP_030503175	AT3G53480						115712934	XP_030497224	AT3G04840
												115718516	XP_030503176	AT2G34930						115712943	XP_030497236	AT3G25100
												115718535	XP_030503196	AT3G08500						115712944	XP_030497237	AT3G07210
												115718550	XP_030503210	AT1G51440						115712950	XP_030497244	AT4G13090
												115718565	XP_030503227	AT5G03170						115712958	XP_030497256	AT1G61700
												115718569	XP_030503230	AT1G09812						115712964	XP_030497261	AT1G68400
												115718543	XP_030503238	AT2G31810						115712997	XP_030497321	AT3G51240
												115718573	XP_030503243	AT5G03170						115712999	XP_030497324	AT3G18990
												115718574	XP_030503244	AT3G20830						115712996	XP_030497325	AT1G21310
												115718592	XP_030503264	AT5G60250						115713000	XP_030497327	AT3G18990
												115718602	XP_030503273	AT3G45290						115713011	XP_030497336	AT5G67630
												115718631	XP_030503305	AT5G64410						115713025	XP_030497357	AT1G24430
												115718634	XP_030503310	AT5G03170						115713030	XP_030497367	AT5G03870
												115718638	XP_030503313	AT2G29890						115713036	XP_030497370	AT1G78995
												115718652	XP_030503334	AT2G45910						115713038	XP_030497372	AT5G64860
												115718674	XP_030503355	AT1G51220						115713050	XP_030497390	AT1G43710
												115718681	XP_030503362	AT4G01470						115713067	XP_030497409	AT1G64960
												115718688	XP_030503369	AT1G54460						115713079	XP_030497424	AT1G23205
												115718693	XP_030503376	AT1G55020						115713117	XP_030497462	AT1G13130
												115718711	XP_030503393	AT1G76520						115713135	XP_030497484	AT3G20230
												115718726	XP_030503412	AT5G03170						115713148	XP_030497494	AT3G11945
												115718727	XP_030503413	AT5G03170						115713150	XP_030497495	AT1G64880
												115718728	XP_030503414	AT5G03170						115713171	XP_030497521	AT3G11945
												115718729	XP_030503415	AT5G03170						115713183	XP_030497528	AT1G60590
												115718742	XP_030503427	AT5G26960						115713185	XP_030497532	AT3G11945
												115718764	XP_030503454	AT1G69680						115713177	XP_030497543	AT2G47010
												115718803	XP_030503485	AT5G60900						115713205	XP_030497548	AT3G11945
												115718829	XP_030503505	AT5G41380						115713215	XP_030497560	AT3G11945
												115718857	XP_030503527	AT2G30090						115713254	XP_030497599	AT5G13930
												115718860	XP_030503529	AT2G37170						115713239	XP_030497605	AT4G01730
												115718865	XP_030503533	AT2G29060						115713279	XP_030497621	AT1G02205
												115718889	XP_030503557	AT3G06130						115713286	XP_030497628	AT1G02205
												115718902	XP_030503572	AT5G49570						115713311	XP_030497654	AT1G79890
												115718905	XP_030503575	AT1G54730						115713319	XP_030497661	AT1G15260
												115718906	XP_030503577	AT1G54730						115713325	XP_030497666	AT4G34138
												115718926	XP_030503612	AT1G58025						115713370	XP_030497711	AT2G31210
												115718961	XP_030503651	AT4G15920						115713375	XP_030497717	AT3G12610
												115718981	XP_030503675	AT5G20960						115713486	XP_030497829	AT5G62530
												115718998	XP_030503699	AT2G39840						115713508	XP_030497852	AT1G10200
												115719002	XP_030503708	AT1G08720						115713450	XP_030497980	AT5G23535
												115719013	XP_030503725	AT1G58230						115713687	XP_030498032	AT2G23090
												115719016	XP_030503733	AT5G59070						115713694	XP_030498036	AT5G01075
												115719020	XP_030503742	AT3G06350						115713754	XP_030498096	AT1G20930
												115719034	XP_030503775	AT5G60390						115713776	XP_030498118	AT3G18990
												115719041	XP_030503785	AT5G16490						115713791	XP_030498134	AT5G66750
												115719046	XP_030503791	AT3G56850						115713792	XP_030498136	AT4G38280
												115719075	XP_030503838	AT3G52890						115713814	XP_030498159	AT1G76310
												115719120	XP_030503903	AT5G59300						115713877	XP_030498218	AT4G28650
												115719139	XP_030503928	AT5G60450						115713887	XP_030498227	AT1G04020
												115719146	XP_030503937	AT4G27290						115713902	XP_030498241	AT5G24530
												115719173	XP_030503970	AT5G28910						115713904	XP_030498244	AT5G43540
												115719184	XP_030503990	AT5G28490						115713923	XP_030498262	AT4G31590
												115719187	XP_030503992	AT2G26870						115713934	XP_030498278	AT4G37680
												115719195	XP_030504001	AT1G09730						115713942	XP_030498289	AT5G58090
												115719230	XP_030504044	AT1G54850						115713967	XP_030498324	AT4G39955
												115719239	XP_030504056	AT5G21105						115713969	XP_030498326	AT3G07090
												115719259	XP_030504084	AT3G17390						115713982	XP_030498340	AT4G36180
												115719260	XP_030504085	AT5G60690						115713987	XP_030498347	AT1G70300
												115719273	XP_030504105	AT5G44730						115713994	XP_030498356	AT4G28650
												115719280	XP_030504115	AT1G17450						115713995	XP_030498357	AT1G04110
												115719290	XP_030504131	AT2G47500						115714024	XP_030498396	AT1G10130
												115719317	XP_030504163	AT5G22090						115714032	XP_030498406	AT3G07500
												115719364	XP_030504237	AT3G14470						115714030	XP_030498407	AT5G42250
												115719371	XP_030504247	AT1G08250						115714047	XP_030498431	AT5G48460
												115719376	XP_030504254	AT3G05660						115714048	XP_030498432	AT1G70280
												115719380	XP_030504262	AT5G59305						115714054	XP_030498440	AT2G01210
												115719385	XP_030504266	AT3G14470						115714062	XP_030498455	AT1G24360
												115719391	XP_030504281	AT2G36380						115714064	XP_030498457	AT2G22900
												115719396	XP_030504291	AT1G09000						115714065	XP_030498458	AT3G16780
												115719399	XP_030504294	AT1G08650						115714075	XP_030498470	AT4G10490
												115719422	XP_030504327	AT4G02590						115714076	XP_030498471	AT4G10490
												115719423	XP_030504328	AT3G54140						115714078	XP_030498472	AT4G10490
												115719426	XP_030504334	AT2G44160						115714083	XP_030498475	AT5G63950
												115719431	XP_030504340	AT3G46130						115714088	XP_030498481	AT3G50980
												115719438	XP_030504350	AT1G09090						115714099	XP_030498503	AT1G76160
												115719457	XP_030504378	AT2G28070						115714104	XP_030498507	AT4G39900
												115719489	XP_030504423	AT5G43470						115714108	XP_030498512	AT5G66460
												115719492	XP_030504426	AT5G60900						115714138	XP_030498559	AT5G43250
												115719493	XP_030504427	AT5G60900						115714165	XP_030498594	AT1G67730
												115719496	XP_030504430	AT5G60020						115714186	XP_030498621	AT2G01630
												115719499	XP_030504434	AT5G60900						115714193	XP_030498633	AT4G37080
												115719505	XP_030504438	AT3G45010						115714196	XP_030498637	AT1G68550
												115719515	XP_030504451	AT5G59050						115714198	XP_030498639	AT2G31320
												115719538	XP_030504480	AT1G58060						115714171	XP_030498640	AT3G62100
												115719540	XP_030504483	AT2G28250						115714202	XP_030498645	AT1G01630
												115719543	XP_030504486	AT5G04560						115714218	XP_030498670	AT1G70600
												115719547	XP_030504498	AT2G36780						115714225	XP_030498684	AT5G48450
												115719548	XP_030504499	AT1G29240						115714226	XP_030498685	AT3G20390
												115719602	XP_030504560	AT5G05340						115714234	XP_030498718	AT4G15000
												115719603	XP_030504561	AT1G09960						115714236	XP_030498721	AT1G67350
												115719611	XP_030504572	AT2G30080						115714258	XP_030498748	AT3G16520
												115719622	XP_030504586	AT5G26340						115714257	XP_030498752	AT4G40060
												115719625	XP_030504594	AT1G09530						115714262	XP_030498755	AT3G23990
												115719632	XP_030504602	AT1G07440						115714263	XP_030498756	AT3G25920
												115719644	XP_030504621	AT1G61000						115714265	XP_030498758	AT2G20300
												115719654	XP_030504633	AT5G60580						115714282	XP_030498786	AT4G39330
												115719664	XP_030504646	AT5G60050						115714299	XP_030498806	AT5G19730
												115719679	XP_030504669	AT1G07710						115714307	XP_030498817	AT3G25930
												115719676	XP_030504670	AT5G46090						115714308	XP_030498820	AT5G13120
												115719686	XP_030504686	AT1G18610						115714315	XP_030498826	AT3G07320
												115719700	XP_030504705	AT3G44260						115714320	XP_030498834	AT5G10080
												115719736	XP_030504771	AT5G18390						115714327	XP_030498851	AT4G33270
												115719780	XP_030504829	AT4G08150						115714338	XP_030498864	AT5G63810
												115719808	XP_030504858	AT4G21380						115714339	XP_030498865	AT5G63800
												115719811	XP_030504861	AT4G27290						115714347	XP_030498882	AT5G10160
												115719848	XP_030504894	AT1G08990						115714353	XP_030498888	AT5G48520
												115719858	XP_030504899	AT5G17920						115714354	XP_030498891	AT1G75900
												115719849	XP_030504912	AT5G40820						115714364	XP_030498899	AT3G60670
												115719895	XP_030504934	AT5G17920						115714366	XP_030498901	AT3G20260
												115719981	XP_030505012	AT5G17980						115714367	XP_030498904	AT4G39790
												115720007	XP_030505035	AT5G28680						115714403	XP_030498953	AT2G18330
												115720097	XP_030505119	AT1G58070						115714406	XP_030498963	AT5G01450
												115720113	XP_030505136	AT5G60020						115714415	XP_030498974	AT3G50660
												115720160	XP_030505178	AT3G09390						115714419	XP_030498980	AT2G25737
												115720264	XP_030505279	AT1G09040						115714434	XP_030499001	AT5G66740
												115720308	XP_030505321	AT5G39160						115714445	XP_030499018	AT3G50870
												115720469	XP_030505476	AT5G12300						115714443	XP_030499020	AT5G56510
												115720517	XP_030505523	AT5G03170						115714455	XP_030499034	AT3G50770
												115720529	XP_030505534	AT2G35940						115714456	XP_030499035	AT1G01050
												115720561	XP_030505564	AT5G60900						115714457	XP_030499036	AT4G36740
												115720582	XP_030505585	AT1G27060						115714466	XP_030499053	AT5G59845
												115720584	XP_030505590	AT2G44430						115714491	XP_030499072	AT1G14900
												115720598	XP_030505606	AT1G75500						115714496	XP_030499081	AT2G01120
												115720604	XP_030505616	AT4G14746						115714504	XP_030499090	AT4G38070
												115720609	XP_030505624	AT2G28160						115714528	XP_030499119	AT1G68500
												115720632	XP_030505657	AT2G38080						115714529	XP_030499120	AT3G04400
												115720642	XP_030505666	AT3G05550						115714539	XP_030499132	AT3G01680
												115720644	XP_030505669	AT5G59510						115714542	XP_030499135	AT1G24540
												115720647	XP_030505671	AT5G39130						115714552	XP_030499146	AT5G65640
												115720660	XP_030505683	AT3G05290						115714568	XP_030499168	AT5G48480
												115720667	XP_030505690	AT5G27395						115714574	XP_030499174	AT2G23110
												115720696	XP_030505722	AT2G36380						115714592	XP_030499199	AT5G13170
												115720706	XP_030505734	AT5G12890						115714593	XP_030499201	AT5G33300
												115720719	XP_030505747	AT1G08440						115714598	XP_030499202	AT4G36420
												115720723	XP_030505750	AT4G24290						115714602	XP_030499207	AT1G71120
												115720724	XP_030505752	AT5G63710						115714604	XP_030499212	AT5G60930
												115720733	XP_030505762	AT3G61220						115714610	XP_030499215	AT5G39820
												115720754	XP_030505791	AT5G66730						115714613	XP_030499219	AT4G18550
												115720756	XP_030505793	AT2G25280						115714621	XP_030499227	AT5G05670
												115720761	XP_030505795	AT1G07090						115714623	XP_030499229	AT2G22610
												115720769	XP_030505806	AT3G57000						115714629	XP_030499234	AT1G68350
												115720790	XP_030505828	AT2G28940						115714631	XP_030499237	AT1G68510
												115720825	XP_030505862	AT3G04560						115714633	XP_030499239	AT1G68470
												115720851	XP_030505896	AT3G22560						115714637	XP_030499242	AT1G19920
												115720877	XP_030505937	AT2G36380						115714641	XP_030499249	AT2G02400
												115720913	XP_030505980	AT3G07360						115714645	XP_030499252	AT5G09970
												115720934	XP_030506006	AT1G08280						115714653	XP_030499263	AT1G16770
												115720940	XP_030506012	AT5G60020						115714657	XP_030499268	AT3G54340
												115720943	XP_030506015	AT2G41475						115714670	XP_030499280	AT2G45560
												115720952	XP_030506026	AT5G63930						115714675	XP_030499287	AT3G26600
												115720956	XP_030506029	AT1G07910						115714698	XP_030499314	AT3G18990
												115720962	XP_030506041	AT4G10050						115714709	XP_030499329	AT4G34760
												115720964	XP_030506043	AT1G71310						115714712	XP_030499330	AT5G66230
												115720968	XP_030506050	AT3G03180						115714726	XP_030499344	AT1G15170
												115720979	XP_030506063	AT5G03170						115714731	XP_030499348	AT5G05810
												115720993	XP_030506076	AT5G39120						115714743	XP_030499359	AT3G54690
												115720997	XP_030506080	AT5G03170						115714744	XP_030499360	AT1G48405
												115721022	XP_030506109	AT1G07400						115714748	XP_030499366	AT2G28625
												115721036	XP_030506125	AT3G03300						115714751	XP_030499368	AT1G67750
												115721055	XP_030506149	AT1G73430						115714766	XP_030499381	AT4G13090
												115721074	XP_030506178	AT2G01820						115714770	XP_030499384	AT1G73360
												115721102	XP_030506211	AT5G28150						115714777	XP_030499389	AT4G12970
												115721103	XP_030506212	AT1G09560						115714784	XP_030499396	AT1G26290
												115721132	XP_030506244	AT1G55020						115714787	XP_030499400	AT4G13710
												115721134	XP_030506246	AT3G10230						115714793	XP_030499404	AT5G66590
												115721141	XP_030506253	AT2G30070						115714796	XP_030499407	AT3G07320
												115721143	XP_030506258	AT1G58360						115714807	XP_030499427	AT4G12970
												115721158	XP_030506269	AT2G30395						115714811	XP_030499430	AT2G23755
												115721187	XP_030506303	AT4G25000						115714813	XP_030499440	AT4G12970
												115721195	XP_030506314	AT2G38430						115714849	XP_030499476	AT1G66910
												115721198	XP_030506317	AT5G20260						115714857	XP_030499483	AT1G04150
												115721202	XP_030506321	AT2G38080						115714862	XP_030499486	AT1G68260
												115721205	XP_030506324	AT2G28840						115714863	XP_030499487	AT5G65220
												115721213	XP_030506332	AT1G47790						115714864	XP_030499488	AT4G24530
												115721254	XP_030506373	AT1G47410						115714877	XP_030499499	AT1G10550
												115721259	XP_030506378	AT1G72210						115714882	XP_030499503	AT3G26430
												115721268	XP_030506393	AT1G55020						115714888	XP_030499506	AT5G17760
												115721282	XP_030506408	AT2G48060						115714895	XP_030499514	AT5G67090
												115721291	XP_030506418	AT3G06350						115714907	XP_030499525	AT3G24860
												115721296	XP_030506427	AT1G08970						115714909	XP_030499527	AT2G23620
												115721307	XP_030506441	AT5G18310						115714925	XP_030499543	AT1G23740
												115721310	XP_030506444	AT5G03170						115714928	XP_030499547	AT2G02500
												115721315	XP_030506449	AT5G03170						115714940	XP_030499565	AT5G10050
												115721325	XP_030506455	AT5G60250						115714949	XP_030499572	AT1G67330
												115721351	XP_030506491	AT2G30230						115714960	XP_030499585	AT4G36440
												115721353	XP_030506493	AT3G02800						115714977	XP_030499611	AT3G18680
												115721364	XP_030506509	AT2G28780						115715005	XP_030499645	AT1G78850
												115721377	XP_030506522	AT2G27230						115715008	XP_030499647	AT3G50930
												115721385	XP_030506530	AT1G08290						115715010	XP_030499649	AT1G36240
												115721389	XP_030506535	AT3G51780						115715022	XP_030499665	AT5G67070
												115721392	XP_030506538	AT2G28315						115715029	XP_030499673	AT1G23790
												115721399	XP_030506544	AT2G27740						115715034	XP_030499679	AT5G10510
												115721410	XP_030506558	AT5G12170						115715044	XP_030499695	AT2G26560
												115721422	XP_030506576	AT2G38430						115715057	XP_030499708	AT5G48830
												115721426	XP_030506579	AT5G14940						115715060	XP_030499712	AT5G43970
												115721433	XP_030506586	AT5G22580						115715086	XP_030499745	AT4G39460
												115721687	XP_030506610	AT1G31050						115715087	XP_030499746	AT5G17350
												115721689	XP_030506612	AT2G36690						115715095	XP_030499755	AT1G48350
												115721701	XP_030506627	AT5G16600						115715096	XP_030499756	AT1G67590
												115721712	XP_030506642	AT1G06620						115715100	XP_030499765	AT1G27950
												115721725	XP_030506656	AT4G14465						115715111	XP_030499780	AT3G50560
												115721738	XP_030506669	AT3G17980						115715119	XP_030499792	AT2G20340
												115721748	XP_030506681	AT1G05370						115715120	XP_030499793	AT5G66390
												115721751	XP_030506685	AT4G28600						115715122	XP_030499794	AT4G36360
												115721785	XP_030506722	AT3G23150						115715123	XP_030499795	AT4G37070
												115721801	XP_030506739	AT1G14790						115715130	XP_030499803	AT1G78950
												115721802	XP_030506740	AT1G14790						115715133	XP_030499805	AT1G68560
												115721803	XP_030506741	AT1G14790						115715152	XP_030499832	AT5G64630
												115721806	XP_030506745	AT1G68020						115715156	XP_030499837	AT2G01200
												115721810	XP_030506749	AT1G11420						115715157	XP_030499838	AT5G09250
												115721811	XP_030506750	AT1G14750						115715158	XP_030499839	AT2G31490
												115721829	XP_030506769	AT2G34930						115715160	XP_030499841	AT5G48720
												115721833	XP_030506776	AT1G14820						115715167	XP_030499848	AT3G25400
												115721836	XP_030506779	AT2G01818						115715178	XP_030499869	AT5G26594
												115721861	XP_030506809	AT1G04570						115715183	XP_030499873	AT4G36250
												115721868	XP_030506818	AT1G22060						115715207	XP_030499911	AT2G28605
												115721874	XP_030506827	AT3G14470						115715223	XP_030499924	AT1G15380
												115721891	XP_030506853	AT4G12300						115715227	XP_030499927	AT5G50670
												115721894	XP_030506855	AT4G14815						115715233	XP_030499933	AT4G37070
												115721917	XP_030506882	AT4G35160						115715241	XP_030499940	AT5G67350
												115721920	XP_030506885	AT5G07990						115715242	XP_030499941	AT5G13140
												115721929	XP_030506894	AT1G74670						115715243	XP_030499942	AT1G67630
												115721937	XP_030506903	AT2G02360						115715245	XP_030499945	AT5G66330
												115721966	XP_030506948	AT5G37478						115715248	XP_030499948	AT2G23350
												115721974	XP_030506954	AT3G47510						115715250	XP_030499952	AT4G35930
												115721983	XP_030506960	AT3G59010						115715261	XP_030499965	AT5G49800
												115721992	XP_030506964	AT5G07990						115715264	XP_030499968	AT5G64620
												115721995	XP_030506969	AT3G50150						115715271	XP_030499977	AT3G23255
												115721996	XP_030506973	AT3G22510						115715277	XP_030499985	AT1G78860
												115722005	XP_030506981	AT1G09240						115715278	XP_030499986	AT2G28120
												115722008	XP_030506984	AT1G70780						115715290	XP_030499999	AT5G66410
												115722011	XP_030506986	AT4G29090						115715301	XP_030500011	AT1G45688
												115722036	XP_030507016	AT5G57280						115715310	XP_030500022	AT5G64816
												115722037	XP_030507020	AT5G57280						115715323	XP_030500039	AT1G67320
												115722063	XP_030507038	AT3G23430						115715325	XP_030500043	AT1G24470
												115722087	XP_030507068	AT1G10800						115715330	XP_030500049	AT5G64820
												115722093	XP_030507075	AT1G14740						115715333	XP_030500053	AT2G15680
												115722108	XP_030507090	AT1G07090						115715335	XP_030500054	AT3G18800
												115722121	XP_030507105	AT3G22890						115715337	XP_030500055	AT4G39380
												115722142	XP_030507132	AT3G24180						115715585	XP_030500083	AT1G64640
												115722168	XP_030507162	AT1G48130						115715587	XP_030500086	AT1G14430
												115722180	XP_030507175	AT4G02080						115715599	XP_030500103	AT1G64350
												115722181	XP_030507176	AT3G51895						115715639	XP_030500158	AT4G25640
												115722184	XP_030507178	AT1G25240						115715645	XP_030500165	AT5G41880
												115722190	XP_030507185	AT4G13180						115715653	XP_030500173	AT1G64405
												115722192	XP_030507188	AT3G22830						115715662	XP_030500181	AT5G05340
												115722198	XP_030507195	AT5G18970						115715670	XP_030500188	AT1G64625
												115722205	XP_030507207	AT2G33360						115715672	XP_030500190	AT4G09060
												115722208	XP_030507209	AT3G06720						115715674	XP_030500192	AT4G25640
												115722237	XP_030507253	AT1G14740						115715681	XP_030500200	AT1G63460
												115722265	XP_030507287	AT3G16640						115715687	XP_030500208	AT5G47610
												115722295	XP_030507324	AT3G23090						115715696	XP_030500220	AT1G12740
												115722303	XP_030507339	AT5G57280						115715720	XP_030500247	AT5G24080
												115722304	XP_030507341	AT5G57280						115715728	XP_030500255	AT3G16520
												115722307	XP_030507345	AT5G43310						115715733	XP_030500259	AT1G72210
												115722317	XP_030507362	AT5G18860						115715743	XP_030500270	AT3G16520
												115722318	XP_030507364	AT3G21510						115715744	XP_030500271	AT4G24150
												115722326	XP_030507378	AT1G06650						115715749	XP_030500279	AT5G52260
												115722327	XP_030507379	AT2G30830						115715751	XP_030500280	AT3G48950
												115722328	XP_030507380	AT1G06620						115715752	XP_030500281	AT3G06240
												115722334	XP_030507387	AT3G06390						115715755	XP_030500287	AT5G46290
												115722337	XP_030507390	AT1G04280						115715764	XP_030500295	AT3G22780
												115722352	XP_030507406	AT2G31970						115715766	XP_030500298	AT4G23820
												115722353	XP_030507407	AT1G04920						115715776	XP_030500310	AT1G62520
												115722355	XP_030507409	AT3G04240						115715779	XP_030500312	AT5G20260
												115722429	XP_030507494	AT1G06620						115715784	XP_030500315	AT5G52950
												115722448	XP_030507517	AT3G07200						115715802	XP_030500330	AT5G41580
												115722473	XP_030507551	AT4G14010						115715807	XP_030500338	AT2G45190
												115722494	XP_030507573	AT3G55760						115715820	XP_030500350	AT4G23030
												115722498	XP_030507579	AT2G01980						115715833	XP_030500360	AT1G21680
												115722500	XP_030507582	AT3G03770						115715839	XP_030500365	AT1G21680
												115722509	XP_030507591	AT3G03570						115715875	XP_030500406	AT5G38260
												115722517	XP_030507606	AT4G14920						115715877	XP_030500409	AT5G38260
												115722528	XP_030507621	AT3G22942						115715878	XP_030500410	AT3G50120
												115722538	XP_030507633	AT4G13510						115715885	XP_030500421	AT4G16807
												115722548	XP_030507649	AT4G24010						115715896	XP_030500433	AT4G37740
												115722557	XP_030507659	AT5G36930						115715914	XP_030500448	AT1G65680
												115722566	XP_030507666	AT5G63930						115715934	XP_030500475	AT5G52920
												115722589	XP_030507688	AT5G55000						115715941	XP_030500482	AT3G56060
												115722598	XP_030507701	AT3G07200						115715947	XP_030500487	AT4G18550
												115722602	XP_030507708	AT5G48820						115715972	XP_030500511	AT5G46570
												115722617	XP_030507726	AT4G31180						115715979	XP_030500517	AT5G51750
												115722631	XP_030507749	AT1G08970						115715985	XP_030500526	AT4G10610
												115722641	XP_030507761	AT1G60710						115715988	XP_030500534	AT4G16760
												115722656	XP_030507776	AT1G66140						115715995	XP_030500543	AT1G32100
												115722667	XP_030507792	AT3G14470						115716002	XP_030500550	AT4G00820
												115722688	XP_030507823	AT1G43700						115716009	XP_030500558	AT4G27720
												115722694	XP_030507828	AT3G22550						115716021	XP_030500569	AT5G52300
												115722723	XP_030507868	AT3G66658						115716036	XP_030500583	AT1G63640
												115722733	XP_030507882	AT1G65810						115716038	XP_030500584	AT4G12420
												115722743	XP_030507895	AT5G19160						115716040	XP_030500587	AT5G47470
												115722744	XP_030507896	AT1G60750						115716048	XP_030500605	AT4G24130
												115722746	XP_030507902	AT3G06550						115716054	XP_030500612	AT1G05260
												115722759	XP_030507922	AT3G14470						115716055	XP_030500613	AT3G49470
												115722770	XP_030507938	AT1G50920						115716059	XP_030500620	AT1G63640
												115722782	XP_030507960	AT1G20270						115716063	XP_030500626	AT3G25810
												115722797	XP_030507983	AT4G14580						115716071	XP_030500635	AT4G17390
												115722806	XP_030507992	AT2G43160						115716086	XP_030500656	AT1G64390
												115722812	XP_030508004	AT1G67050						115716102	XP_030500683	AT4G17090
												115722818	XP_030508012	AT1G76040						115716115	XP_030500698	AT3G10950
												115722829	XP_030508022	AT1G68090						115716123	XP_030500711	AT4G11640
												115722878	XP_030508089	AT1G65810						115716135	XP_030500727	AT2G28100
												115722891	XP_030508107	AT2G37870						115716167	XP_030500773	AT1G64160
												115722893	XP_030508109	AT3G14170						115716168	XP_030500774	AT1G64160
												115722896	XP_030508115	AT3G23590						115716170	XP_030500778	AT5G41650
												115722905	XP_030508131	AT1G14730						115716172	XP_030500780	AT2G46330
												115722919	XP_030508154	AT5G18900						115716190	XP_030500791	AT5G52920
												115722927	XP_030508169	AT4G02860						115716202	XP_030500801	AT5G24310
												115722928	XP_030508170	AT5G49520						115716207	XP_030500809	AT5G52300
												115722933	XP_030508180	AT5G26330						115716198	XP_030500832	AT3G47860
												115722968	XP_030508219	AT3G59340						115716226	XP_030500837	AT4G25300
												115722973	XP_030508224	AT2G43120						115716229	XP_030500841	AT5G59970
												115722970	XP_030508225	AT1G76040						115716230	XP_030500842	AT5G59970
												115723013	XP_030508269	AT3G18270						115716232	XP_030500844	AT5G53020
												115723033	XP_030508291	AT3G16770						115716241	XP_030500856	AT5G23940
												115723035	XP_030508292	AT2G29620						115716249	XP_030500868	AT1G63850
												115723037	XP_030508294	AT4G37650						115716251	XP_030500870	AT5G47500
												115723034	XP_030508295	AT5G42200						115716265	XP_030500887	AT4G25960
												115723038	XP_030508296	AT5G48960						115716291	XP_030500913	AT1G62500
												115723039	XP_030508297	AT2G05210						115716295	XP_030500916	AT5G62360
												115723069	XP_030508338	AT3G23160						115716296	XP_030500917	AT4G25260
												115723084	XP_030508359	AT5G54920						115716323	XP_030500948	AT1G28960
												115723106	XP_030508392	AT2G43420						115716326	XP_030500953	AT5G17050
												115723117	XP_030508405	AT4G13330						115716337	XP_030500965	AT2G45650
												115723130	XP_030508417	AT2G33310						115716346	XP_030500982	AT2G28100
												115723136	XP_030508428	AT3G22600						115716382	XP_030501025	AT3G55120
												115723143	XP_030508437	AT1G05460						115716384	XP_030501028	AT4G25600
												115723149	XP_030508444	AT2G47710						115716386	XP_030501031	AT1G33140
												115723179	XP_030508472	AT5G18980						115716405	XP_030501051	AT3G25810
												115722899	XP_030508478	AT1G50030						115716407	XP_030501053	AT1G44900
												115723198	XP_030508493	AT3G16920						115716415	XP_030501062	AT5G24000
												115723220	XP_030508515	AT4G02860						115716443	XP_030501098	AT5G41140
												115723240	XP_030508534	AT1G68080						115716448	XP_030501105	AT5G44710
												115723269	XP_030508570	AT1G03220						115716463	XP_030501131	AT5G46610
												115723272	XP_030508574	AT1G05510						115716485	XP_030501156	AT1G32540
												115723275	XP_030508578	AT3G63380						115716527	XP_030501198	AT4G10380
												115723311	XP_030508609	AT2G02360						115716530	XP_030501203	AT5G23910
												115723355	XP_030508665	AT2G01950						115716543	XP_030501215	AT3G01680
												115723385	XP_030508717	AT5G27930						115716547	XP_030501219	AT4G23490
												115723397	XP_030508732	AT1G48090						115716550	XP_030501222	AT5G46880
												115723398	XP_030508733	AT1G02520						115716565	XP_030501243	AT4G17550
												115723402	XP_030508740	AT5G42180						115716570	XP_030501249	AT5G07010
												115723410	XP_030508749	AT1G48280						115716578	XP_030501267	AT1G32100
												115723426	XP_030508777	AT1G74300						115716592	XP_030501281	AT5G58930
												115723435	XP_030508783	AT5G26340						115716594	XP_030501284	AT1G64980
												115723453	XP_030508800	AT1G68200						115716595	XP_030501285	AT1G12500
												115723455	XP_030508803	AT4G33420						115716596	XP_030501286	AT4G27585
												115723464	XP_030508814	AT3G22740						115716600	XP_030501289	AT5G24020
												115723468	XP_030508820	AT5G38210						115716604	XP_030501298	AT4G16740
												115723531	XP_030508886	AT3G03940						115716590	XP_030501312	AT3G54560
												115723574	XP_030508924	AT1G20160						115716620	XP_030501315	AT4G23860
												115723715	XP_030509053	AT5G12890						115716621	XP_030501316	AT5G53660
												115723701	XP_030509058	AT3G50700						115716622	XP_030501317	AT1G01110
												115723735	XP_030509072	AT3G14470						115716635	XP_030501338	AT3G45900
												115724062	XP_030509377	AT3G22400						115716647	XP_030501354	AT2G47110
												115724068	XP_030509384	AT3G17980						115716673	XP_030501385	AT3G16520
												115724084	XP_030509399	AT5G28840						115716700	XP_030501425	AT5G46740
												115724093	XP_030509408	AT2G30840						115716676	XP_030501428	AT5G60930
												115724105	XP_030509425	AT5G39890						115716703	XP_030501430	AT5G52390
												115724122	XP_030509449	AT5G17680						115716704	XP_030501431	AT5G24080
												115724125	XP_030509453	AT5G45250						115716732	XP_030501474	AT1G32170
												115724126	XP_030509454	AT5G45230						115716735	XP_030501477	AT1G32100
												115724160	XP_030509484	AT3G03450						115716742	XP_030501496	AT5G07180
												115724166	XP_030509491	AT3G26010						115716745	XP_030501501	AT1G54530
												115724176	XP_030509508	AT4G34131						115716754	XP_030501508	AT1G75060
												115724204	XP_030509548	AT3G21420						115716756	XP_030501512	AT4G22880
												115724207	XP_030509551	AT1G56720						115716758	XP_030501514	AT1G69480
												115724215	XP_030509557	AT3G22800						115716759	XP_030501516	AT1G26740
												115724449	XP_030509595	AT4G25810						115716751	XP_030501543	AT3G63430
												115724453	XP_030509601	AT1G55270						115716791	XP_030501552	AT4G18760
												115724456	XP_030509605	AT5G20400						115716792	XP_030501554	AT5G24165
												115724459	XP_030509608	AT2G04160						115716803	XP_030501567	AT5G24520
												115724460	XP_030509610	AT2G04160						115716805	XP_030501569	AT4G16740
												115724461	XP_030509614	AT1G42540						115716814	XP_030501581	AT5G52390
												115724465	XP_030509616	AT5G57685						115716817	XP_030501582	AT1G65680
												115724468	XP_030509619	AT5G10990						115716823	XP_030501591	AT2G21060
												115724484	XP_030509636	AT3G07470						115716825	XP_030501593	AT5G24330
												115724495	XP_030509647	AT5G55860						115716848	XP_030501613	AT5G52060
												115724510	XP_030509665	AT4G16400						115716863	XP_030501627	AT5G54165
												115724531	XP_030509689	AT1G22030						115716879	XP_030501651	AT5G46880
												115724544	XP_030509706	AT5G51160						115716881	XP_030501655	AT1G09380
												115724546	XP_030509707	AT4G10265						115716885	XP_030501659	AT4G11080
												115724553	XP_030509718	AT1G49320						115716911	XP_030501694	AT5G06370
												115724555	XP_030509720	AT3G14470						115716917	XP_030501698	AT5G62170
												115724565	XP_030509728	AT5G51350						115716929	XP_030501710	AT4G16515
												115724566	XP_030509729	AT2G44300						115716930	XP_030501711	AT4G39230
												115724564	XP_030509730	AT4G31330						115716931	XP_030501712	AT4G39230
												115724571	XP_030509742	AT2G31940						115716935	XP_030501721	AT4G17030
												115724573	XP_030509746	AT5G54530						115716939	XP_030501726	AT3G49240
												115724575	XP_030509748	AT3G52880						115716942	XP_030501728	AT2G23910
												115724585	XP_030509761	AT2G25490						115716945	XP_030501732	AT1G02260
												115724593	XP_030509770	AT3G26300						115716965	XP_030501751	AT1G02260
												115724597	XP_030509772	AT3G28650						115716968	XP_030501755	AT4G22600
												115724600	XP_030509776	AT4G30510						115716979	XP_030501764	AT3G61920
												115724603	XP_030509779	AT4G10265						115716990	XP_030501776	AT2G19170
												115724608	XP_030509785	AT4G08300						115716991	XP_030501777	AT3G06030
												115724614	XP_030509798	AT3G26300						115716998	XP_030501782	AT5G59970
												115724630	XP_030509820	AT3G47570						115717012	XP_030501800	AT1G63100
												115724666	XP_030509867	AT1G13110						115717018	XP_030501806	AT3G13540
												115724672	XP_030509870	AT5G55560						115717019	XP_030501807	AT1G50240
												115724683	XP_030509881	AT2G34930						115717043	XP_030501844	AT3G44590
												115724719	XP_030509916	AT2G24960						115717045	XP_030501846	AT5G41315
												115724726	XP_030509922	AT2G18370						115717046	XP_030501847	AT5G52020
												115724778	XP_030509984	AT2G31900						115717059	XP_030501858	AT4G20780
												115724798	XP_030510005	AT2G21850						115717090	XP_030501888	AT5G12020
												115724831	XP_030510041	AT4G21380						115717103	XP_030501906	AT1G12330
												115724842	XP_030510059	AT3G50120						115717104	XP_030501907	AT4G33110
												115724857	XP_030510078	AT4G02340						115717106	XP_030501909	AT3G14260
												115724869	XP_030510090	AT4G21440						115717139	XP_030501949	AT5G41970
[truncated: 867 more rows]
