# Supplementary material for: Genome-wide identification of cannabinoid biosynthesis genes in non-drug type Cannabis (Cannabis sativa L.) cultivar
Source: J Cannabis Res. 2024 Sep 7;6:35. doi: 10.1186/s42238-024-00246-8 (PMC11380790; doi:10.1186/s42238-024-00246-8)
Supplement: Supplementary file 5 — Supplementary Material 5: Supplementary Table S5. Lists of GO terms from each gene cluster. [file 42238_2024_246_MOESM5_ESM.xlsx]

## Sheet: Cluster1
GO term	Number of genes	Genes	PValue	Benjamini
Porphyrin-containing compound metabolic process	9	AT5G14910, AT4G30620, AT5G22340, AT4G17560, AT2G33180, AT1G23090, AT3G23530, AT3G21870, AT1G29070	6.5986e-08	2.24352e-05
Response to light stimulus	21	AT4G03400, AT2G05160, AT2G34430, AT5G19460, AT5G43470, AT3G25160, AT4G25830, AT5G22340, AT1G23090, AT5G14320, AT3G23530, AT3G21870, AT4G28660, AT5G53490, AT2G40490, AT3G13120, AT4G17560, AT1G74070, AT3G50685, AT2G43560, AT2G21370	0.000123193	0.0149016
Macromolecular complex assembly	8	AT5G53490, AT3G13120, AT3G54210, AT2G14880, AT2G33180, AT4G28660, AT2G43560, AT2G21370	0.000131485	0.0149016
Plastid translation	4	AT1G79850, AT4G37920, AT3G56910, AT3G63190	0.000600554	0.0510471
Response to cold	11	AT1G35680, AT2G47730, AT4G24770, AT4G38840, AT3G52150, AT1G74070, AT3G21870, AT3G28040, AT1G24620, AT5G06290, AT3G08920	0.00128201	0.0871769
Seed development	11	AT1G56130, AT3G13120, AT5G22340, AT4G17560, AT2G33180, AT5G57170, AT4G09960, AT1G17650, AT3G23530, AT3G28040, AT3G27160	0.00206717	0.11714
Chlorophyll biosynthetic process	4	AT2G40490, AT3G27160, AT5G58250, AT3G14930	0.0108948	0.511105
Chloroplast rRNA processing	3	AT4G24770, AT1G06190, AT3G52150	0.012026	0.511105
Regulation of cellular catabolic process	2	AT5G53490, AT2G40490	0.014489	0.517832
Response to oomycetes	3	AT5G20230, AT5G43470, AT2G39210	0.0152303	0.517832
Translation	15	AT1G64510, AT1G35680, AT4G01310, AT1G05190, AT3G54210, AT5G14320, AT1G29070, AT2G33450, AT1G78630, AT3G13120, AT1G79850, AT3G44890, AT4G17560, AT3G27160, AT3G63190	0.0179269	0.554104
Protein localization to organelle	3	AT1G17650, AT3G23530, AT2G33450	0.0358041	0.809277
Small molecule biosynthetic process	3	AT4G00770, AT2G05160, AT3G27160	0.0374184	0.809277
Cellular response to nitrogen starvation	3	AT3G15580, AT4G15920, AT5G26880	0.0374184	0.809277
Recognition of pollen	3	AT1G11340, AT4G27290, AT4G03230	0.0390601	0.809277
Response to absence of light	3	AT5G20230, AT5G43470, AT4G15920	0.0407288	0.809277
Cellular response to oxidative stress	3	AT4G28730, AT3G26060, AT4G09010	0.0407288	0.809277
Granum assembly	2	AT5G08050, AT4G01150	0.0428441	0.809277
Cellular ketone metabolic process	2	AT2G05160, AT3G27160	0.0498052	0.891252
Thylakoid membrane organization	3	AT1G35680, AT3G47450, AT5G08050	0.0568857	0.967056
Lipid biosynthetic process	5	AT5G44010, AT3G54210, AT3G28040, AT4G28660, AT1G29070	0.0611429	0.989932
Heterocycle catabolic process	2	AT5G53490, AT2G40490	0.0905279	1
Cellular nitrogen compound catabolic process	2	AT5G53490, AT2G40490	0.0905279	1

## Sheet: Cluster2
GO term	Number of genes	Genes	PValue	Benjamini
Response to light stimulus	175	AT3G02570, AT1G55480, AT1G61520, AT1G37130, AT2G17972, AT5G07240, AT1G19150, AT2G43060, AT4G38690, AT4G29070, AT3G48200, AT3G11560, AT1G60950, AT1G76570, AT1G76450, AT2G05100, AT3G47470, AT4G13670, AT3G45290, AT4G34770, AT3G47070, AT3G26650, AT3G29240, AT1G12480, AT5G25220, AT3G53530, AT1G35340, AT5G24490, AT3G21760, AT2G36145, AT4G28660, AT4G28025, AT5G55570, AT1G52510, AT4G14870, AT4G39710, AT4…	2.55989e-52	2.8722e-49
Photosynthesis	54	AT1G55480, AT1G30380, AT2G06520, AT3G54050, AT3G59780, AT3G01440, AT4G09650, AT1G15820, AT4G02260, AT5G64040, AT4G05180, AT4G15530, AT5G08410, AT5G38660, AT1G08520, AT1G76450, AT1G74470, AT5G54190, AT2G20260, AT5G54270, AT1G79040, AT3G05410, AT4G18480, AT5G23120, AT2G01918, AT4G28660, AT1G20020, AT1G52230, AT1G54130, AT2G26670, AT1G77090, AT1G14150, AT4G12800, AT3G01500, AT5G19855, AT1G31330, AT3…	1.64559e-36	9.23174e-34
Chlorophyll metabolic process	24	AT1G67700, AT1G30380, AT1G57770, AT1G06690, AT2G06520, AT1G08550, AT4G27700, AT4G12800, AT1G31330, AT1G14345, AT1G48450, AT5G56850, AT3G63540, AT4G38690, AT2G21960, AT5G35970, AT4G24090, AT1G03130, AT1G76450, AT1G15290, AT5G40950, AT2G23670, AT5G01410, AT1G04620	1.01285e-18	3.78806e-16
Chloroplast organization	40	AT1G62750, AT3G25690, AT5G40270, AT1G32080, AT4G16390, AT3G27750, AT1G09340, AT5G24120, AT5G15450, AT3G08010, AT5G49940, AT4G12800, AT2G30950, AT5G61670, AT4G26150, AT3G63140, AT3G57190, AT1G79600, AT1G24490, AT4G38470, AT1G08540, AT2G24060, AT4G13670, AT3G56940, AT5G18570, AT5G50920, AT4G04850, AT4G01940, AT3G02380, AT4G25910, AT2G32480, AT4G27670, AT4G28740, AT4G20360, AT2G20570, AT3G25805, AT5…	1.30845e-14	3.67021e-12
Photosystem II assembly	16	AT3G01480, AT1G55480, AT1G34000, AT5G24120, AT3G22690, AT1G71500, AT1G16720, AT2G20890, AT3G46610, AT4G10340, AT1G03600, AT4G35250, AT5G02120, AT1G73060, AT3G50820, AT4G19100	2.121e-14	4.75952e-12
Photosynthesis, light harvesting in photosystem I	15	AT1G08380, AT3G08940, AT1G61520, AT3G54890, AT1G15820, AT1G29930, AT1G19150, AT4G10340, AT3G61470, AT1G45474, AT2G40100, AT1G76570, AT2G05100, AT3G47470, AT5G54270	5.60062e-14	1.04732e-11
Response to cold	56	AT4G24770, AT1G61520, AT3G54890, AT1G09340, AT1G28140, AT3G54050, AT3G59780, AT4G09650, AT3G26744, AT4G01370, AT1G45474, AT5G61410, AT5G08650, AT5G38660, AT5G58070, AT2G05100, AT3G47470, AT2G27290, AT1G35460, AT3G26650, AT3G22370, AT3G22690, AT1G62780, AT1G35340, AT2G01918, AT1G70200, AT1G16880, AT2G36145, AT2G39730, AT3G23700, AT4G20260, AT3G61470, AT5G13650, AT3G16460, AT1G50450, AT1G24620, AT1…	1.76171e-12	2.76548e-10
Photosynthetic electron transport in photosystem I	13	AT1G55370, AT1G15980, AT1G64770, AT1G55670, AT4G12800, AT3G54050, AT4G09650, AT1G18730, AT4G22890, AT5G64040, AT3G16250, AT1G70760, AT2G01590	1.97183e-12	2.76548e-10
Thylakoid membrane organization	19	AT5G18570, AT2G34860, AT2G30170, AT3G22690, AT1G03160, AT2G30950, AT2G20890, AT3G25805, AT4G14870, AT4G31390, AT4G13200, AT1G74730, AT1G24490, AT5G12130, AT2G28800, AT3G10670, AT2G01110, AT5G22830, AT4G31780	5.32382e-12	6.63702e-10
Photosynthesis, light harvesting	13	AT1G61520, AT3G54890, AT1G15820, AT1G29930, AT1G19150, AT4G10340, AT3G61470, AT1G45474, AT2G40100, AT1G76570, AT2G05100, AT3G47470, AT5G54270	2.23697e-11	2.50988e-09
Protein-chromophore linkage	18	AT3G08940, AT1G61520, AT3G54890, AT1G15820, AT1G29930, AT4G17600, AT1G19150, AT4G10340, AT3G61470, AT1G45474, AT2G40100, AT3G45780, AT5G02120, AT1G76570, AT2G05100, AT3G47470, AT5G54270, AT5G58140	5.89233e-11	6.01018e-09
Macromolecular complex assembly	28	AT5G21430, AT5G22620, AT4G02920, AT5G17870, AT3G62410, AT3G05625, AT3G61920, AT5G06790, AT2G01320, AT1G75460, AT5G05740, AT1G02560, AT1G04420, AT4G36530, AT3G19800, AT2G43560, AT2G26340, AT5G25840, AT5G23120, AT1G62780, AT4G24700, AT5G16810, AT4G28660, AT1G70820, AT5G13630, AT5G54585, AT1G50450, AT2G27680	7.11294e-10	6.6506e-08
Photosynthetic electron transport chain	12	AT1G08380, AT4G05180, AT4G31390, AT4G27800, AT3G18890, AT5G44520, AT5G49740, AT1G14150, AT2G01918, AT4G03280, AT1G60950, AT3G01440	1.7515e-09	1.51168e-07
Response to high light intensity	15	AT1G61520, AT1G55480, AT3G54890, AT3G22690, AT3G61470, AT5G64940, AT1G79600, AT1G45474, AT4G34190, AT5G02120, AT5G58070, AT2G05100, AT4G14890, AT3G47470, AT5G54270	8.66157e-09	6.94163e-07
Response to blue light	22	AT5G20220, AT2G36630, AT1G07570, AT5G43630, AT1G66840, AT1G07010, AT5G24120, AT4G24700, AT1G28140, AT4G00050, AT4G31390, AT5G35970, AT2G46735, AT1G50020, AT3G45780, AT1G42550, AT1G08540, AT2G46340, AT1G08810, AT4G13010, AT3G24190, AT5G58140	1.29777e-08	9.70733e-07
Nonphotochemical quenching	9	AT5G45680, AT4G10340, AT1G74730, AT4G03280, AT4G31530, AT1G56500, AT4G31040, AT3G15840, AT1G15820	1.32867e-07	9.31731e-06
Response to low light intensity stimulus	10	AT1G61520, AT3G61470, AT3G54890, AT1G45474, AT5G19940, AT1G03130, AT2G05100, AT3G47470, AT5G16810, AT5G66580	2.89848e-07	1.74919e-05
Pigment metabolic process	13	AT1G06690, AT4G27700, AT1G62780, AT2G37240, AT1G17100, AT1G14345, AT1G32900, AT4G38690, AT5G35970, AT1G03130, AT1G76450, AT1G15290, AT5G40950	2.96209e-07	1.74919e-05
Cellular response to light stimulus	13	AT2G30170, AT1G64860, AT2G37240, AT3G59780, AT1G68010, AT2G36990, AT5G13730, AT2G46735, AT3G53920, AT1G08540, AT2G42750, AT4G13010, AT3G24190	2.96209e-07	1.74919e-05
Chlorophyll biosynthetic process	15	AT3G56940, AT4G02920, AT4G18480, AT5G19940, AT4G01690, AT1G16730, AT3G19830, AT5G13630, AT4G25080, AT1G08520, AT5G12470, AT2G20180, AT1G74470, AT5G54190, AT2G44760	4.89801e-07	2.74778e-05
Negative regulation of cellular metabolic process	13	AT1G30380, AT1G57770, AT2G06520, AT1G64680, AT1G31330, AT5G13630, AT5G08650, AT5G35970, AT2G05310, AT1G22750, AT3G12345, AT1G02475, AT2G20260	8.30995e-07	4.31072e-05
Terpenoid metabolic process	12	AT4G25650, AT2G27290, AT3G47070, AT1G70580, AT5G08650, AT1G09130, AT5G35970, AT2G46735, AT1G64680, AT3G25410, AT3G24190, AT1G14345	8.46013e-07	4.31072e-05
Circadian rhythm	20	AT1G35460, AT1G68830, AT1G09340, AT3G01060, AT5G24470, AT1G18330, AT3G26740, AT4G26150, AT3G06500, AT3G63140, AT1G69690, AT5G64940, AT1G01060, AT3G46780, AT3G45780, AT5G02120, AT3G12320, AT2G46790, AT4G13010, AT5G58140	8.83659e-07	4.31072e-05
Response to light intensity	28	AT2G30150, AT1G34000, AT2G39705, AT2G42975, AT5G48790, AT1G67480, AT3G02730, AT2G45600, AT2G01320, AT5G08650, AT5G64840, AT5G35970, AT2G42610, AT1G75460, AT5G18050, AT4G13010, AT3G24190, AT3G19800, AT5G52900, AT2G27290, AT4G03420, AT3G04760, AT5G16010, AT1G14345, AT5G13630, AT5G54585, AT1G50450, AT5G18080	2.15652e-06	0.000100817
Plastid translation	9	AT3G63140, AT5G40270, AT3G46610, AT1G09340, AT1G70200, AT2G33800, AT4G31850, AT2G17240, AT1G68590	3.83771e-06	0.000172236
NADH dehydrogenase complex (plastoquinone) assembly	6	AT1G74880, AT5G20935, AT4G37925, AT1G70760, AT5G52780, AT5G58260	8.36715e-06	0.000361075
Response to red light	16	AT5G67030, AT2G32560, AT5G24120, AT5G24470, AT3G17040, AT4G26150, AT5G66580, AT4G32280, AT4G31390, AT5G56550, AT1G79600, AT1G08540, AT2G05100, AT4G15550, AT2G46340, AT3G15115	1.01854e-05	0.000423262
Small molecule biosynthetic process	11	AT3G26580, AT2G05160, AT5G19850, AT2G26500, AT5G04440, AT5G35970, AT2G42975, AT2G37240, AT3G05625, AT5G40950, AT3G24190	1.10104e-05	0.000441201
Chlorophyll catabolic process	8	AT2G20890, AT4G37000, AT4G31390, AT4G22920, AT3G44880, AT4G16690, AT4G13250, AT5G13800	1.50779e-05	0.00058336
Regulation of RNA biosynthetic process	5	AT5G13730, AT5G24120, AT1G64860, AT3G53920, AT1G08540	1.83074e-05	0.000684697
Porphyrin-containing compound metabolic process	14	AT3G29240, AT1G09130, AT1G78915, AT2G39080, AT1G72030, AT1G52230, AT1G76890, AT1G02560, AT2G42220, AT2G47770, AT4G36850, AT2G27680, AT2G24395, AT1G02475	1.94232e-05	0.000702996
Reductive pentose-phosphate cycle	8	AT1G32060, AT3G26650, AT5G61410, AT2G45290, AT3G54050, AT3G62410, AT5G38430, AT3G55800	2.17551e-05	0.000762787
Cellular response to blue light	6	AT5G24120, AT1G75100, AT5G64840, AT3G22840, AT1G16730, AT2G36990	3.49522e-05	0.00118837
Response to red or far red light	20	AT5G20220, AT5G62140, AT1G16730, AT5G06790, AT3G14690, AT1G52510, AT1G72030, AT5G13630, AT1G32900, AT2G43060, AT2G01320, AT5G54585, AT5G64840, AT5G35970, AT2G46735, AT1G05870, AT1G03130, AT4G13010, AT3G24190, AT3G19800	4.3097e-05	0.0014222
Photosystem I assembly	7	AT2G34860, AT5G42270, AT3G22690, AT3G08010, AT4G25910, AT2G30950, AT3G55250	8.62587e-05	0.00276521
Photorespiration	11	AT1G70580, AT1G80380, AT1G32080, AT5G36700, AT5G04140, AT2G35370, AT5G38430, AT4G17360, AT1G68010, AT3G14420, AT2G13360	0.000130006	0.00399282
Response to nitrate	8	AT1G12110, AT1G32450, AT5G40890, AT3G62950, AT3G21670, AT4G26150, AT1G03020, AT4G15680	0.000131671	0.00399282
Photosystem II repair	6	AT4G02530, AT1G03600, AT1G55480, AT2G30950, AT1G54780, AT1G75690	0.000159703	0.00471544
Cytochrome b6f complex assembly	5	AT1G59840, AT3G26710, AT3G17930, AT5G54290, AT4G37200	0.000230237	0.00645814
Photosystem II stabilization	5	AT3G01480, AT5G01920, AT1G71500, AT2G30570, AT3G50820	0.000230237	0.00645814
Lipid biosynthetic process	22	AT2G30150, AT5G19850, AT1G60000, AT2G42975, AT3G23760, AT1G64680, AT3G59780, AT3G25410, AT5G66450, AT3G23510, AT4G28660, AT5G06790, AT1G70580, AT4G33580, AT5G13630, AT1G32900, AT1G75210, AT2G46735, AT1G50020, AT1G05870, AT1G76450, AT4G36850	0.000272136	0.00744725
Cellular catabolic process	36	AT1G55280, AT5G19850, AT2G06520, AT2G39705, AT1G15140, AT2G38330, AT1G28140, AT1G50940, AT1G67480, AT3G14690, AT1G21680, AT1G01490, AT5G05200, AT3G11560, AT2G42750, AT4G15550, AT3G62190, AT4G36850, AT5G51160, AT4G13010, AT4G01935, AT2G20260, AT3G23560, AT3G56140, AT5G19940, AT3G01990, AT5G16810, AT3G23600, AT2G39080, AT4G36040, AT2G30600, AT3G13130, AT4G15140, AT1G10090, AT1G77670, AT4G12690	0.000481342	0.0128587
Vitamin E biosynthetic process	5	AT1G06570, AT3G63410, AT1G64970, AT5G39220, AT1G74470	0.000643225	0.0167837
De-etiolation	6	AT4G37470, AT3G08010, AT5G23060, AT3G59780, AT4G00050, AT2G43010	0.000662352	0.01689
Cellular lipid metabolic process	19	AT5G19850, AT3G23760, AT2G37240, AT3G59780, AT5G16810, AT3G23510, AT4G28660, AT3G25805, AT4G33580, AT4G15530, AT5G13630, AT1G32900, AT2G01320, AT3G62860, AT1G75210, AT1G50020, AT5G37360, AT1G76450, AT4G36850	0.000943276	0.023519
Photoinhibition	5	AT5G42270, AT4G30950, AT2G30950, AT3G50820, AT4G04020	0.000975501	0.0237937
Organic substance catabolic process	20	AT4G25650, AT3G26580, AT3G05130, AT2G06520, AT2G39705, AT1G15140, AT3G56140, AT5G19940, AT5G16810, AT3G23600, AT2G39080, AT4G36040, AT1G01490, AT1G10090, AT5G05200, AT2G42750, AT1G02560, AT4G15550, AT3G62190, AT4G01935	0.00137316	0.0327805
Fructose 1,6-bisphosphate metabolic process	5	AT4G26530, AT1G43670, AT3G54050, AT3G55800, AT4G38970	0.00141226	0.0330115
Photosynthesis, light reaction	6	AT1G67700, AT4G38690, AT1G06680, AT5G52100, AT3G01440, AT3G50820	0.00188013	0.0430513
Photoprotection	5	AT2G35490, AT3G22840, AT5G22830, AT4G22240, AT4G04020	0.00196895	0.0441832
Plastoquinone biosynthetic process	4	AT1G17050, AT1G06570, AT3G63410, AT5G09820	0.00263587	0.0552848
Carotene biosynthetic process	4	AT4G14210, AT3G04870, AT3G10230, AT5G61670	0.00263587	0.0552848
Response to herbicide	5	AT4G32280, AT1G12110, AT2G40610, AT1G37130, AT5G54270	0.00266077	0.0552848
Sucrose biosynthetic process	5	AT5G40390, AT4G10120, AT1G43670, AT3G54050, AT3G55800	0.00266077	0.0552848
Chloroplast rRNA processing	6	AT4G24770, AT1G60000, AT1G12800, AT2G33800, AT3G52380, AT2G17240	0.00288927	0.0589411
Fructose 6-phosphate metabolic process	5	AT1G43670, AT3G54050, AT4G26270, AT1G07110, AT3G55800	0.00350248	0.0689435
Chloroplast RNA processing	5	AT3G57430, AT5G13650, AT4G16390, AT3G18110, AT3G52380	0.00350248	0.0689435
Xanthophyll biosynthetic process	4	AT5G67030, AT1G31800, AT1G28100, AT3G10230	0.00407925	0.0775749
PSII associated light-harvesting complex II catabolic process	4	AT5G42270, AT2G30950, AT4G13250, AT5G53170	0.00407925	0.0775749
Cell redox homeostasis	8	AT1G50320, AT5G06690, AT4G03520, AT3G15360, AT4G35090, AT1G76080, AT5G54290, AT3G02730	0.0043272	0.0809186
Response to temperature stimulus	15	AT4G25650, AT1G30360, AT1G65230, AT1G31330, AT1G14345, AT5G10695, AT5G05580, AT5G13630, AT2G03500, AT5G38200, AT5G38430, AT1G03130, AT3G09580, AT2G46790, AT2G43560	0.0050367	0.0926423
Photosystem stoichiometry adjustment	3	AT4G27800, AT1G67840, AT1G64860	0.00568337	0.0982462
Plastoglobule organization	3	AT4G31390, AT1G79600, AT3G07700	0.00568337	0.0982462
Plastid organization	5	AT5G23120, AT1G58200, AT3G17040, AT3G10420, AT5G36170	0.00569162	0.0982462
Regulation of chlorophyll biosynthetic process	5	AT5G50920, AT2G20570, AT3G22690, AT4G26150, AT3G22840	0.00569162	0.0982462
Regulation of stomatal closure	7	AT3G56400, AT1G12480, AT2G26650, AT5G23060, AT3G59780, AT2G05100, AT4G01370	0.0060371	0.102631
Response to oxidative stress	34	AT1G31170, AT4G01970, AT1G60470, AT5G40390, AT1G14870, AT1G14550, AT5G20140, AT3G57520, AT2G19810, AT4G35090, AT4G21860, AT3G07700, AT4G13310, AT5G56550, AT5G64940, AT3G15360, AT1G05870, AT1G25400, AT4G35000, AT4G03520, AT5G43750, AT5G59080, AT5G16990, AT2G47180, AT2G34060, AT5G16970, AT4G28660, AT5G53050, AT4G31870, AT1G10090, AT2G29500, AT1G76080, AT5G01410, AT4G35770	0.00745103	0.124777
Positive regulation of translation	4	AT3G63140, AT4G16390, AT1G09340, AT5G08650	0.00817993	0.129477
Phylloquinone biosynthetic process	4	AT1G60550, AT1G48320, AT1G18870, AT1G30520	0.00817993	0.129477
Photosynthetic acclimation	4	AT5G46110, AT4G04850, AT1G68830, AT1G60950	0.00817993	0.129477
Carotenoid biosynthetic process	6	AT4G14210, AT3G04870, AT1G31800, AT1G06570, AT3G10230, AT2G26670	0.00819329	0.129477
Chaperone-mediated protein folding	5	AT5G45680, AT4G13830, AT3G47650, AT5G19855, AT4G04330	0.0104297	0.160303
Polysaccharide catabolic process	5	AT4G17090, AT3G54420, AT1G09340, AT3G23920, AT3G12500	0.0104297	0.160303
Response to karrikin	13	AT4G01970, AT3G52740, AT3G57520, AT1G50900, AT4G03280, AT4G27030, AT3G22840, AT1G25520, AT4G37470, AT4G37370, AT4G31870, AT3G47470, AT5G05600	0.0106251	0.1611
Regulation of photosynthesis	4	AT4G04850, AT4G31390, AT1G67840, AT4G01800	0.0108816	0.162789
Cellular response to oxidative stress	7	AT1G31170, AT5G64940, AT5G57345, AT1G66330, AT4G25130, AT3G07700, AT4G35000	0.0123487	0.182306
Response to far red light	7	AT4G32280, AT5G56550, AT5G24120, AT5G24470, AT2G05100, AT4G00050, AT2G46340	0.0137301	0.200068
DNA-templated transcription, initiation	6	AT5G13730, AT5G24120, AT1G64860, AT3G53920, AT1G08540, AT2G36990	0.0141659	0.203771
Oxoacid metabolic process	21	AT5G52900, AT1G55280, AT2G36630, AT2G06520, AT1G30360, AT3G23560, AT3G57680, AT3G56140, AT3G01930, AT3G01990, AT2G25737, AT2G39080, AT5G13630, AT4G13310, AT2G42610, AT1G10090, AT1G20560, AT4G35750, AT5G23810, AT1G22750, AT4G19550	0.017181	0.244013
Fructose metabolic process	4	AT1G43670, AT3G54050, AT1G07110, AT3G55800	0.0176588	0.244277
Chloroplast localization	3	AT1G01320, AT4G28080, AT1G15290	0.0178527	0.244277
Response to paraquat	3	AT4G31390, AT4G27940, AT5G58070	0.0178527	0.244277
Response to wounding	48	AT5G47740, AT1G55480, AT3G51420, AT1G09340, AT5G23210, AT1G30360, AT4G38060, AT1G67340, AT1G72510, AT4G21780, AT3G61920, AT5G47240, AT4G21440, AT4G02260, AT1G70810, AT5G46050, AT3G61060, AT3G17860, AT4G08170, AT1G24530, AT4G16740, AT5G56550, AT4G34190, AT3G11420, AT1G23200, AT4G36850, AT1G25400, AT2G32560, AT3G54420, AT4G03420, AT5G16010, AT3G01930, AT5G16810, AT1G70820, AT3G19830, AT5G53050, AT1…	0.0193475	0.26154
Iron-sulfur cluster assembly	6	AT4G01940, AT4G25910, AT5G49940, AT3G10670, AT1G10500, AT3G24430	0.0225257	0.293882
Pigment biosynthetic process	6	AT1G48450, AT3G48200, AT5G46390, AT5G05740, AT3G24190, AT2G26340	0.0225257	0.293882
Stomatal movement	6	AT1G32080, AT1G12480, AT3G51550, AT1G08810, AT4G17970, AT5G58140	0.0225257	0.293882
Gluconeogenesis	5	AT4G26530, AT1G43670, AT3G54050, AT3G55800, AT4G38970	0.0228806	0.29508
Leaf senescence	16	AT3G56400, AT5G51720, AT1G32450, AT3G02150, AT3G27110, AT1G66330, AT2G39730, AT4G02260, AT2G39200, AT5G64940, AT4G36040, AT3G15030, AT5G60970, AT4G16690, AT1G54130, AT5G16080	0.0257044	0.325633
Chloroplast relocation	3	AT3G25690, AT1G42550, AT5G58140	0.0260004	0.325633
Nitrate transport	5	AT1G12110, AT5G62720, AT1G32450, AT5G40890, AT2G38100	0.0261203	0.325633
Monocarboxylic acid metabolic process	13	AT5G19850, AT3G23560, AT5G57910, AT3G61920, AT3G23600, AT1G70580, AT4G15530, AT3G62860, AT1G06110, AT1G15290, AT4G15550, AT2G42760, AT4G01935	0.0300582	0.370607
Positive regulation of catalytic activity	4	AT1G50320, AT4G03520, AT3G15360, AT3G02730	0.0313422	0.382238
Phototropism	5	AT3G19830, AT5G47750, AT3G45780, AT5G58140, AT2G43010	0.0333862	0.402788
Glycine decarboxylation via glycine cleavage system	3	AT2G35370, AT4G33010, AT1G11860	0.0353462	0.40885
Regulation of peroxisome size	3	AT2G39970, AT3G47430, AT1G01820	0.0353462	0.40885
Protein import into chloroplast thylakoid membrane	3	AT2G20890, AT2G28800, AT5G03940	0.0353462	0.40885
Positive regulation of chlorophyll biosynthetic process	3	AT4G17600, AT4G31390, AT4G26150	0.0353462	0.40885
Tetrapyrrole metabolic process	6	AT5G55570, AT3G23560, AT1G15140, AT3G23760, AT5G03880, AT1G75460	0.0367552	0.42081
Negative regulation of leaf senescence	4	AT3G61060, AT3G56400, AT2G20570, AT2G45680	0.0427934	0.480142
Starch catabolic process	4	AT4G17090, AT1G43670, AT3G10940, AT3G23920	0.0427934	0.480142
Regulation of photosynthesis, light reaction	3	AT4G33470, AT1G68830, AT5G08720	0.0457685	0.498566
Carbon utilization	3	AT4G33580, AT1G70410, AT3G01500	0.0457685	0.498566
Positive regulation of development, heterochronic	3	AT3G15030, AT5G60970, AT3G02150	0.0457685	0.498566
Protein stabilization	5	AT5G13650, AT1G79600, AT1G55670, AT5G61670, AT5G27280	0.0511107	0.548964
Monocarboxylic acid biosynthetic process	6	AT3G19830, AT4G03420, AT4G33580, AT1G73210, AT3G23760, AT5G16810	0.0513736	0.548964
Oxidative photosynthetic carbon pathway	3	AT1G80380, AT1G68010, AT3G14420	0.0571541	0.604971
Regulation of stomatal movement	7	AT1G70410, AT3G01500, AT3G45780, AT1G65480, AT2G26670, AT5G54270, AT4G01370	0.0592043	0.620815
Carboxylic acid metabolic process	18	AT5G43260, AT1G64720, AT5G16010, AT1G09130, AT2G20920, AT1G64680, AT1G50940, AT1G70820, AT1G70810, AT5G53050, AT1G22360, AT1G21680, AT1G77210, AT1G01490, AT3G11560, AT1G77670, AT4G36850, AT2G46100	0.0627422	0.651629
Unsaturated fatty acid biosynthetic process	4	AT5G05580, AT4G30950, AT1G74960, AT4G27030	0.0633044	0.651629
Organelle organization	14	AT3G02690, AT1G15760, AT2G17972, AT1G28140, AT4G38180, AT1G01320, AT3G14690, AT2G21530, AT1G72030, AT4G28080, AT1G03130, AT1G15290, AT3G10970, AT2G24395	0.0651507	0.664537
Carbon fixation	3	AT5G19855, AT5G38430, AT4G04330	0.0693977	0.67708
Protein maturation by iron-sulfur cluster transfer	3	AT4G01940, AT4G25910, AT5G49940	0.0693977	0.67708
CAAX-box protein processing	3	AT3G26085, AT4G17840, AT3G27110	0.0693977	0.67708
Regulation of abscisic acid biosynthetic process	3	AT1G52340, AT1G13930, AT3G26744	0.0693977	0.67708
Sucrose catabolic process	3	AT5G22510, AT1G56560, AT3G06500	0.0693977	0.67708
Porphyrin-containing compound biosynthetic process	4	AT2G30390, AT4G12800, AT3G09580, AT4G01690	0.0709811	0.686559
Response to toxic substance	5	AT3G23560, AT4G01070, AT4G15550, AT5G51160, AT2G36750	0.073056	0.700588
Response to inorganic substance	39	AT5G47740, AT1G06690, AT2G42975, AT1G15140, AT1G59960, AT2G37240, AT1G67340, AT2G25737, AT1G50940, AT2G36770, AT3G14690, AT4G33580, AT2G24860, AT1G32900, AT2G43060, AT5G12470, AT1G05870, AT4G15550, AT3G19900, AT1G04420, AT2G23670, AT1G25400, AT1G22750, AT4G19550, AT3G53470, AT1G07570, AT1G57770, AT3G23560, AT1G09130, AT4G25170, AT3G01990, AT4G28660, AT2G40280, AT4G17840, AT1G50450, AT1G77670, AT1…	0.0754309	0.717233
Chloroplast accumulation movement	4	AT1G66840, AT1G75100, AT3G45780, AT5G67385	0.0790531	0.745358
Peptidyl-lysine monomethylation	3	AT5G14260, AT1G14030, AT3G07670	0.0824013	0.764085
Response to carbon dioxide	3	AT1G12480, AT1G70410, AT3G01500	0.0824013	0.764085
Starch biosynthetic process	5	AT5G19220, AT1G32900, AT3G01180, AT4G32190, AT3G55800	0.0855522	0.76982
Regulation of glucose metabolic process	2	AT1G01320, AT3G06483	0.0864503	0.76982
Regulation of tocopherol cyclase activity	2	AT4G31390, AT1G79600	0.0864503	0.76982
Regulation of response to reactive oxygen species	2	AT5G64940, AT3G07700	0.0864503	0.76982
Negative regulation of anion channel activity by blue light	2	AT3G45780, AT5G58140	0.0864503	0.76982
Chloroplast avoidance movement	4	AT1G66840, AT1G75100, AT1G42550, AT3G45780	0.0875038	0.773065
Heme biosynthetic process	3	AT2G30390, AT2G20180, AT4G01690	0.0960739	0.837726
Response to freezing	4	AT3G06510, AT5G58070, AT2G31180, AT3G26744	0.0963161	0.837726
Response to sucrose	7	AT3G06850, AT3G26650, AT5G04140, AT3G62410, AT3G47340, AT1G16880, AT1G08810	0.0984165	0.84941

## Sheet: Cluster3
GO term	Number of genes	Genes	PValue	Benjamini
Regulation of transcription, DNA-templated	41	AT2G35940, AT5G14280, AT5G19790, AT2G47190, AT3G04030, AT2G38470, AT5G61270, AT3G57040, AT2G43060, AT1G50680, AT2G47260, AT4G17230, AT2G28200, AT2G20180, AT4G34530, AT4G27950, AT1G15750, AT3G54500, AT1G09570, AT1G06040, AT1G69310, AT3G55370, AT3G22830, AT4G27310, AT5G15800, AT4G30080, AT2G42280, AT3G47500, AT5G39820, AT5G58620, AT1G05805, AT1G79430, AT2G26430, AT1G75250, AT5G02320, AT2G40140, AT3…	3.71824e-05	0.022012
Cellular potassium ion homeostasis	4	AT5G25110, AT5G55630, AT4G35290, AT3G53720	7.68235e-05	0.0227397
Response to water deprivation	28	AT5G24600, AT2G47190, AT4G08920, AT5G26340, AT2G38470, AT3G15780, AT4G14540, AT5G65730, AT3G12630, AT3G52710, AT1G06780, AT5G58070, AT1G46768, AT1G76390, AT4G25650, AT1G13990, AT1G64065, AT1G59870, AT1G69310, AT2G36780, AT5G11650, AT2G01830, AT4G37790, AT5G35560, AT5G13550, AT1G10090, AT2G22590, AT4G34000	0.000179993	0.0355186
Cellular response to oxygen-containing compound	16	AT1G13990, AT5G22850, AT5G18130, AT5G44090, AT2G19710, AT5G11700, AT4G36550, AT2G02800, AT4G17900, AT2G48030, AT3G52710, AT1G10090, AT3G47570, AT4G15240, AT5G38280, AT5G60900	0.0003399	0.0469344
Regulation of transcription from RNA polymerase II promoter	15	AT2G35940, AT5G62020, AT4G22950, AT5G62165, AT1G18750, AT2G16770, AT3G22830, AT5G15800, AT4G14540, AT2G42280, AT2G22540, AT2G47810, AT1G05805, AT2G26430, AT2G45660	0.000396406	0.0469344
Protein phosphorylation	21	AT3G09830, AT1G65950, AT1G56130, AT4G25160, AT4G05200, AT3G22750, AT1G67580, AT2G30360, AT2G02800, AT2G01830, AT4G29380, AT5G65710, AT3G16030, AT3G51630, AT3G47570, AT5G58350, AT5G38260, AT1G61500, AT5G38280, AT5G60900, AT1G06840	0.00212745	0.209909
Hormone-mediated signaling pathway	13	AT1G13990, AT5G18130, AT1G64065, AT2G19710, AT5G11700, AT4G36550, AT5G11650, AT4G17900, AT2G48030, AT1G10090, AT1G21000, AT4G15240, AT1G06840	0.00284857	0.240907
Response to blue light	7	AT3G01470, AT5G19140, AT5G67390, AT4G08920, AT4G34530, AT1G01520, AT5G42900	0.00343782	0.254399
Response to abscisic acid	24	AT4G25650, AT2G35940, AT1G13990, AT5G18130, AT2G47190, AT1G59870, AT1G64065, AT2G19710, AT5G26340, AT4G22200, AT4G02020, AT2G38640, AT2G36780, AT1G21280, AT5G11650, AT4G37790, AT4G37030, AT5G35560, AT3G52710, AT1G21000, AT2G22590, AT1G06840, AT4G34000, AT5G42900	0.00493738	0.30039
Response to light stimulus	26	AT4G19160, AT5G24600, AT3G51480, AT4G08920, AT3G56630, AT3G21690, AT3G05327, AT5G61270, AT1G21280, AT2G43060, AT1G01390, AT3G48980, AT5G58070, AT4G25650, AT1G06460, AT1G06040, AT5G58800, AT1G77930, AT5G11650, AT5G63700, AT1G05805, AT2G26710, AT5G65840, AT4G35290, AT2G22590, AT2G41250	0.00507416	0.30039
Plant-type hypersensitive response	6	AT4G12560, AT1G59870, AT3G52430, AT3G07040, AT2G26560, AT1G02860	0.00567296	0.305309
Defense response to bacterium	24	AT3G09830, AT1G59870, AT1G64065, AT4G00830, AT3G52430, AT3G21690, AT4G05200, AT2G38470, AT3G07525, AT4G36550, AT1G52565, AT2G02800, AT5G11650, AT2G01830, AT5G55970, AT2G27830, AT4G17900, AT2G23150, AT3G52710, AT5G51160, AT5G38280, AT5G60900, AT1G06840, AT1G02860	0.0131618	0.59624
Photomorphogenesis	5	AT4G08920, AT1G06040, AT1G09570, AT3G55370, AT1G01520	0.0138403	0.59624
Negative regulation of innate immune response	3	AT4G00830, AT4G34530, AT2G28550	0.0142555	0.59624
Response to salt stress	15	AT5G23750, AT3G01470, AT2G47190, AT1G59870, AT1G06040, AT1G69310, AT5G26340, AT2G38470, AT5G11700, AT4G36550, AT1G52565, AT5G11650, AT2G26430, AT2G40140, AT4G34000	0.0167479	0.59624
Response to osmotic stress	11	AT4G25650, AT5G11650, AT2G22660, AT5G22850, AT2G43060, AT1G69310, AT2G19710, AT3G12630, AT1G10090, AT2G38470, AT1G21000	0.0168638	0.59624
Signal transduction	22	AT3G27260, AT5G22850, AT2G34930, AT5G25110, AT5G44090, AT3G21510, AT2G30360, AT3G22810, AT1G52565, AT2G02800, AT1G47890, AT3G14270, AT4G12300, AT1G22930, AT3G52710, AT2G45380, AT5G13590, AT3G47570, AT1G20670, AT5G38280, AT5G60900, AT1G06840	0.0171218	0.59624
Positive regulation of cellular process	6	AT5G18130, AT3G54440, AT1G76020, AT2G03140, AT5G11700, AT1G06840	0.0203306	0.599431
Phosphorelay signal transduction system	4	AT2G01830, AT1G67710, AT3G21510, AT3G57040	0.0241378	0.599431
Response to chitin	12	AT4G36550, AT5G11650, AT1G64065, AT1G59870, AT4G17900, AT5G62020, AT3G52710, AT1G72510, AT2G38470, AT1G21000, AT3G47570, AT2G40140	0.0245961	0.599431
Positive regulation of transcription, DNA-templated	10	AT4G14540, AT3G01470, AT4G34590, AT2G47190, AT4G00830, AT1G79430, AT3G55370, AT1G46768, AT4G34000, AT2G45660	0.0248235	0.599431
Flower development	10	AT3G27260, AT2G22540, AT3G47500, AT1G79430, AT5G42400, AT4G22950, AT4G34530, AT5G62040, AT5G15800, AT2G45660	0.0256481	0.599431
Oligopeptide transport	3	AT5G13400, AT1G59740, AT4G26590	0.0256535	0.599431
Response to continuous far red light stimulus by the high-irradiance response system	2	AT2G35940, AT1G09570	0.0262492	0.599431
Positive regulation of transcription from RNA polymerase II promoter	7	AT2G21970, AT2G22540, AT4G22950, AT5G62165, AT1G18750, AT5G15800, AT2G45660	0.0270328	0.599431
Chlorophyll catabolic process	3	AT4G37000, AT3G60690, AT4G16690	0.0282591	0.599431
Regulation of seed germination	4	AT2G01830, AT5G55630, AT2G20180, AT1G60190	0.0283514	0.599431
Lignin biosynthetic process	4	AT5G05980, AT4G01070, AT1G31720, AT1G61820	0.0283514	0.599431
Response to wounding	18	AT1G13990, AT5G18130, AT3G51480, AT5G41120, AT3G51420, AT4G38060, AT1G19640, AT1G72510, AT5G11700, AT2G36780, AT2G02800, AT2G21970, AT5G11650, AT5G13550, AT4G17900, AT1G10090, AT1G21000, AT1G76390	0.0296419	0.605104
Cytokinin-activated signaling pathway	5	AT4G27950, AT2G01830, AT1G67710, AT3G21510, AT3G57040	0.0314957	0.621515
Glycosyl compound metabolic process	3	AT1G52565, AT5G10770, AT5G13550	0.0366702	0.700283
Cellular sodium ion homeostasis	2	AT4G35290, AT5G58070	0.0391151	0.701701
Trehalose metabolic process	2	AT4G24040, AT1G78580	0.0391151	0.701701
Response to oomycetes	3	AT2G34930, AT1G59870, AT2G39210	0.0459095	0.799366
Negative regulation of defense response	3	AT4G12560, AT1G59870, AT3G52430	0.0491599	0.831504
Positive regulation of shade avoidance	2	AT4G08920, AT1G06040	0.0518115	0.834373
Systemic acquired resistance	5	AT1G59870, AT3G52430, AT2G38470, AT5G60900, AT1G02860	0.0521483	0.834373
Vegetative to reproductive phase transition of meristem	7	AT3G27260, AT1G06040, AT5G42400, AT1G20670, AT5G62040, AT5G42900, AT2G28550	0.0540805	0.842518
Cellular response to organic cyclic compound	4	AT2G02800, AT5G44090, AT3G47570, AT5G60900	0.0611081	0.879205
Regulation of signal transduction	4	AT5G11650, AT5G18130, AT1G13990, AT1G06840	0.0632866	0.879205
Response to lead ion	2	AT5G06370, AT5G26220	0.0643408	0.879205
Lead ion transport	2	AT5G06370, AT2G23150	0.0643408	0.879205
Anatomical structure morphogenesis	2	AT3G27010, AT5G56180	0.0643408	0.879205
Defense response to other organism	15	AT3G27260, AT1G13990, AT3G54440, AT5G44090, AT5G11700, AT3G16210, AT4G37000, AT5G10770, AT1G24430, AT3G60690, AT5G13550, AT4G30230, AT3G47570, AT1G76390, AT5G38280	0.0653463	0.879205
Innate immune response	5	AT5G11650, AT4G00830, AT3G16030, AT3G21690, AT1G61500	0.0697466	0.904266
Negative regulation of translation	3	AT3G01470, AT4G34590, AT1G09570	0.0702639	0.904266
Response to strigolactone	2	AT4G08920, AT1G07200	0.0767051	0.966158
Response to toxic substance	3	AT3G21690, AT4G01070, AT5G51160	0.0817325	1
Cellular lipid metabolic process	6	AT2G30900, AT5G65840, AT3G21690, AT3G52710, AT1G76020, AT1G01520	0.088032	1
Amylopectin biosynthetic process	2	AT5G24300, AT5G03650	0.0889065	1
Regulation of defense response	12	AT4G36550, AT2G02800, AT5G11650, AT5G18130, AT3G54440, AT3G21690, AT3G52710, AT1G10090, AT3G47570, AT5G38280, AT5G60900, AT1G76390	0.0919199	1
Secondary metabolic process	9	AT3G21600, AT1G13990, AT5G14890, AT5G65840, AT3G21690, AT1G76020, AT5G51160, AT2G38640, AT2G22590	0.0941313	1

## Sheet: Cluster4
GO term	Number of genes	Genes	PValue	Benjamini
Plant-type secondary cell wall biogenesis	36	AT5G44030, AT5G20540, AT2G34410, AT3G06550, AT5G15630, AT5G67210, AT2G38970, AT2G36330, AT4G09990, AT2G38080, AT1G23460, AT4G36890, AT2G37090, AT5G11100, AT1G75500, AT5G34940, AT1G27440, AT1G43790, AT1G43650, AT1G09610, AT4G18780, AT3G45010, AT1G79420, AT2G46770, AT2G40230, AT2G29050, AT1G14185, AT5G17420, AT3G59690, AT1G17950, AT1G02630, AT4G10350, AT5G03170, AT2G28315, AT3G18660, AT2G40320	1.21803e-14	1.93302e-11
Lignin biosynthetic process	20	AT1G79180, AT1G15950, AT5G48930, AT4G01070, AT3G17390, AT1G67980, AT5G60020, AT1G23460, AT1G72680, AT2G38080, AT4G36220, AT4G34050, AT1G52760, AT3G19450, AT5G05340, AT2G40890, AT1G61820, AT2G46770, AT5G54160, AT3G16920	1.87469e-10	1.48757e-07
Response to abscisic acid	112	AT3G22060, AT4G35987, AT4G10720, AT1G71960, AT2G20900, AT5G43180, AT4G29100, AT5G46050, AT3G62990, AT3G47510, AT5G07920, AT3G08040, AT1G08800, AT1G52080, AT2G23450, AT5G46220, AT3G55830, AT3G09770, AT2G17840, AT5G67300, AT2G36780, AT2G37870, AT5G49690, AT1G44170, AT3G63210, AT5G13530, AT2G30720, AT5G02640, AT2G35940, AT5G25610, AT3G57540, AT1G14350, AT4G33985, AT3G06550, AT1G55020, AT3G56850, AT3…	1.69527e-08	8.56072e-06
Xylan biosynthetic process	15	AT2G34410, AT1G08990, AT3G55990, AT3G06550, AT5G67210, AT2G38320, AT4G09990, AT2G37090, AT5G54690, AT4G36890, AT1G73140, AT5G01360, AT3G18660, AT1G09610, AT2G28760	2.15771e-08	8.56072e-06
Xylem development	15	AT2G28250, AT5G61480, AT5G64530, AT5G53730, AT5G60690, AT4G21780, AT3G59690, AT3G21710, AT4G08150, AT5G02030, AT5G05340, AT4G13195, AT5G13180, AT2G27230, AT1G64625	6.02916e-07	0.000159471
Regulation of secondary cell wall biogenesis	15	AT4G28500, AT1G79180, AT3G08500, AT3G27200, AT4G29230, AT5G49660, AT3G59690, AT1G17950, AT5G16600, AT5G60720, AT3G15050, AT1G43790, AT4G33450, AT4G12350, AT1G63910	6.02916e-07	0.000159471
Protein phosphorylation	85	AT4G21380, AT4G23160, AT1G56130, AT3G01840, AT1G34300, AT4G03390, AT2G33580, AT2G39840, AT4G03230, AT3G03940, AT1G11300, AT5G56890, AT5G54590, AT2G18470, AT5G63710, AT5G55560, AT2G01820, AT1G29740, AT2G05940, AT4G27290, AT3G09010, AT2G28940, AT1G53050, AT2G23450, AT5G15080, AT2G25790, AT4G21390, AT1G61370, AT1G67510, AT3G01490, AT3G25560, AT1G70520, AT5G61480, AT4G05200, AT2G35050, AT4G20140, AT3…	1.51942e-06	0.000344474
Cell wall organization	42	AT4G24010, AT5G48930, AT5G44030, AT2G14620, AT1G08990, AT5G20260, AT1G06490, AT5G49720, AT3G58790, AT2G36870, AT3G22800, AT5G57560, AT4G36890, AT2G37090, AT5G54690, AT1G71380, AT1G75500, AT1G27440, AT1G43790, AT5G03760, AT1G05570, AT4G18780, AT3G08840, AT3G03050, AT1G12260, AT4G25810, AT5G17420, AT4G29230, AT2G13680, AT1G55850, AT5G08370, AT1G17950, AT4G20140, AT2G27500, AT2G18060, AT1G75110, AT3…	1.34849e-05	0.00244893
Tissue development	70	AT3G50370, AT5G20540, AT1G09980, AT1G67420, AT5G25590, AT3G56230, AT4G21780, AT2G37980, AT2G36330, AT5G67470, AT2G38430, AT5G63710, AT1G46480, AT2G37390, AT3G47510, AT1G79760, AT1G76250, AT3G07470, AT4G15093, AT3G28050, AT4G22160, AT3G50380, AT1G04280, AT5G42420, AT3G01490, AT3G26330, AT2G46860, AT5G56460, AT1G11915, AT5G04740, AT1G11080, AT5G02640, AT5G40720, AT5G03610, AT5G22580, AT5G23110, AT3…	1.38881e-05	0.00244893
Defense response to bacterium	107	AT5G44030, AT5G40990, AT2G20900, AT2G37980, AT5G46050, AT2G19990, AT5G10530, AT4G16820, AT4G11650, AT2G01300, AT3G09010, AT1G78230, AT2G23450, AT1G06620, AT5G18370, AT5G24530, AT3G55550, AT5G67300, AT5G45250, AT4G17900, AT2G30720, AT4G31550, AT3G14200, AT2G02360, AT3G27890, AT1G55020, AT1G70530, AT3G26600, AT1G17620, AT3G01420, AT3G22800, AT5G63930, AT4G14465, AT3G44260, AT4G18780, AT2G46150, AT3…	1.74241e-05	0.0027652
Cellular response to hypoxia	35	AT2G32210, AT5G45340, AT3G02550, AT1G33055, AT5G44730, AT3G23150, AT4G26270, AT4G01250, AT5G57560, AT1G66080, AT4G10265, AT4G38470, AT1G74310, AT2G26660, AT5G39890, AT1G77120, AT5G58070, AT4G34131, AT2G26560, AT1G43800, AT1G78070, AT5G24530, AT1G68620, AT5G42200, AT1G19530, AT3G22550, AT2G36460, AT2G16060, AT2G46500, AT4G33070, AT5G54960, AT1G23710, AT1G03220, AT1G07400, AT4G19880	3.83491e-05	0.00549374
Response to salicylic acid	44	AT5G25930, AT1G15520, AT1G14790, AT5G40990, AT5G15870, AT4G10500, AT3G26600, AT3G01420, AT5G46050, AT3G11280, AT2G01300, AT1G05570, AT2G46150, AT3G50410, AT3G16510, AT2G23450, AT5G60900, AT2G24240, AT1G66920, AT2G37710, AT5G43470, AT5G24530, AT5G40460, AT4G32940, AT1G05690, AT1G80450, AT1G68620, AT5G49570, AT5G67300, AT3G02800, AT5G67480, AT1G48280, AT5G63160, AT2G19130, AT3G14280, AT5G36930, AT2…	4.15405e-05	0.00549374
Response to wounding	82	AT1G78080, AT5G18860, AT1G03080, AT4G06744, AT4G21780, AT4G02340, AT1G17840, AT5G46050, AT1G27200, AT1G74790, AT1G17370, AT3G47510, AT2G02990, AT1G43650, AT2G46370, AT1G52080, AT2G27690, AT2G23450, AT1G06620, AT3G54420, AT4G26640, AT5G43470, AT5G50200, AT1G04280, AT5G48960, AT3G26330, AT3G21240, AT2G36380, AT2G36780, AT5G24090, AT4G20140, AT5G56460, AT4G15800, AT1G72300, AT3G19010, AT4G17900, AT2…	5.50342e-05	0.00658892
Xylem and phloem pattern formation	12	AT4G36890, AT4G08150, AT3G14170, AT2G01950, AT5G02030, AT3G50780, AT5G60690, AT5G49660, AT1G19300, AT1G73590, AT5G03610, AT4G17220	5.81253e-05	0.00658892
Response to salt stress	62	AT2G33540, AT2G32210, AT1G78080, AT3G51780, AT4G35987, AT1G55760, AT2G20900, AT1G28380, AT1G17840, AT2G38750, AT1G35910, AT3G17980, AT1G27200, AT2G01980, AT5G35750, AT5G07920, AT1G04120, AT1G52080, AT2G23450, AT2G38800, AT1G05690, AT2G17840, AT5G67300, AT4G21870, AT5G24090, AT1G44170, AT1G68090, AT2G46500, AT2G21660, AT4G10310, AT5G13330, AT2G30720, AT5G25610, AT3G57540, AT5G26340, AT3G22200, AT1…	0.000114274	0.0120902
Protein autophosphorylation	29	AT1G56130, AT1G09000, AT1G16130, AT1G70530, AT5G49760, AT4G05150, AT5G28680, AT1G29740, AT3G09010, AT3G50310, AT1G09970, AT1G08720, AT3G03770, AT1G62400, AT5G24010, AT1G11050, AT1G70520, AT1G56720, AT4G22540, AT2G46500, AT2G46700, AT1G29750, AT1G18890, AT1G76040, AT5G38210, AT3G10660, AT1G08650, AT4G32300, AT2G40120	0.000148439	0.0147233
Response to water deprivation	94	AT1G78080, AT5G43180, AT4G02340, AT2G38750, AT1G27200, AT5G34940, AT3G62990, AT5G35750, AT5G07920, AT3G09010, AT1G43650, AT5G58070, AT1G52080, AT4G35300, AT1G08720, AT1G06620, AT2G38800, AT4G00430, AT1G58440, AT2G35930, AT3G29320, AT2G17840, AT2G15220, AT5G67300, AT2G36780, AT5G49690, AT1G68090, AT3G14280, AT2G21660, AT2G20770, AT3G19010, AT5G13330, AT5G57830, AT5G39785, AT2G30720, AT2G21180, AT1…	0.000186381	0.0173992
Regulation of transcription, DNA-templated	140	AT5G06839, AT1G78080, AT1G32240, AT4G18170, AT4G35900, AT1G31150, AT3G07340, AT4G38180, AT4G29100, AT3G11280, AT4G35580, AT1G46480, AT1G71200, AT5G03680, AT1G77300, AT2G24260, AT5G50670, AT4G36710, AT3G50410, AT1G75080, AT2G33310, AT4G24060, AT3G52440, AT4G29230, AT1G68200, AT5G66730, AT5G67300, AT1G66140, AT1G30330, AT5G44160, AT1G75410, AT3G16220, AT4G37650, AT4G29080, AT4G15200, AT4G17500, AT2…	0.000240673	0.0212193
Amyloplast organization	5	AT4G37650, AT5G46860, AT2G36810, AT1G31480, AT2G26890	0.000271755	0.0226987
Auxin-activated signaling pathway	30	AT2G33860, AT1G14350, AT4G04920, AT4G35987, AT2G36910, AT3G53480, AT3G42800, AT2G19580, AT1G75500, AT1G07910, AT5G12330, AT2G23810, AT3G13980, AT2G46690, AT4G16340, AT2G33310, AT3G02260, AT2G17500, AT2G38120, AT1G30330, AT3G12090, AT1G69160, AT4G29080, AT5G60450, AT1G50030, AT2G01950, AT1G76520, AT5G37020, AT1G73590, AT3G16500	0.00060155	0.047733
Glucuronoxylan biosynthetic process	6	AT2G37090, AT5G54690, AT4G36890, AT1G27440, AT3G18660, AT1G19300	0.000719185	0.0543498
Phenylpropanoid biosynthetic process	6	AT4G36220, AT2G30490, AT2G37040, AT3G53260, AT2G40890, AT3G24503	0.00110429	0.0761958
Drought recovery	6	AT3G16640, AT5G27930, AT1G70670, AT3G20250, AT2G37040, AT3G10500	0.00110429	0.0761958
Response to fungus	37	AT5G40990, AT4G10500, AT1G70530, AT3G59340, AT2G20900, AT5G66440, AT2G30230, AT2G37980, AT5G66600, AT5G50670, AT1G20990, AT2G28940, AT1G08720, AT2G24240, AT1G06620, AT1G66920, AT5G24530, AT1G64065, AT5G67620, AT5G18310, AT3G02260, AT2G15760, AT3G21240, AT1G29240, AT3G02800, AT5G08370, AT5G59510, AT5G61820, AT3G14280, AT3G13330, AT3G19010, AT5G37840, AT4G17900, AT2G30720, AT2G45910, AT3G10120, AT5…	0.00119866	0.0792614
Positive regulation of transcription, DNA-templated	37	AT1G61660, AT5G47220, AT4G01550, AT1G63120, AT5G49520, AT3G56850, AT4G35900, AT5G16600, AT3G16770, AT5G60720, AT5G12330, AT4G18020, AT3G50410, AT2G46770, AT2G27230, AT4G28500, AT1G79180, AT4G26640, AT3G08500, AT3G01470, AT3G55990, AT4G29230, AT5G44160, AT4G10350, AT4G17500, AT2G18160, AT1G50030, AT3G15050, AT5G13330, AT5G11590, AT2G46680, AT4G33450, AT4G12350, AT3G10500, AT1G63910, AT4G39410, AT1…	0.00127251	0.0807789
Defense response	76	AT5G24620, AT4G24290, AT2G16760, AT2G20900, AT1G28380, AT4G01250, AT1G75800, AT1G14930, AT2G19990, AT5G47260, AT3G14470, AT3G17980, AT4G11650, AT1G77700, AT3G61220, AT1G19230, AT5G07920, AT1G75040, AT4G34131, AT5G15080, AT1G08720, AT1G77380, AT3G45290, AT3G54420, AT5G18370, AT4G19050, AT3G48080, AT5G17680, AT5G43470, AT2G35930, AT3G25560, AT1G70840, AT5G45250, AT1G09090, AT5G56460, AT4G17500, AT5…	0.00143832	0.0877925
Positive regulation of auxin mediated signaling pathway	5	AT1G69160, AT1G50030, AT5G67300, AT3G13980, AT3G42800	0.00193754	0.113884
Protein retention in Golgi apparatus	4	AT5G24740, AT3G50380, AT1G48090, AT4G17140	0.00272326	0.15134
Gibberellic acid mediated signaling pathway	14	AT3G03450, AT4G25420, AT5G66730, AT5G20190, AT1G14920, AT2G39840, AT5G48170, AT3G03940, AT1G74670, AT2G03500, AT1G08970, AT1G09530, AT3G50700, AT5G25900	0.00276551	0.15134
Vegetative phase change	5	AT5G20320, AT2G33860, AT5G60450, AT1G69440, AT2G15790	0.00305831	0.153194
Meristem maintenance	14	AT5G19440, AT1G67510, AT1G05370, AT1G07090, AT3G01300, AT2G30933, AT1G53035, AT1G23380, AT1G52150, AT5G11160, AT4G32980, AT4G36920, AT2G46150, AT5G15080	0.00308898	0.153194
Phloem or xylem histogenesis	14	AT3G55830, AT5G47220, AT2G41820, AT3G01490, AT1G31320, AT5G61480, AT1G23460, AT4G17500, AT1G46480, AT5G60200, AT5G35750, AT1G52150, AT5G40720, AT4G13195	0.00308898	0.153194
Response to osmotic stress	38	AT1G78080, AT4G04920, AT4G35987, AT3G22560, AT1G17620, AT4G21440, AT5G67590, AT2G38750, AT1G35910, AT3G62990, AT3G20250, AT5G35750, AT1G27461, AT3G09010, AT4G18780, AT1G77120, AT5G39050, AT4G25650, AT1G58340, AT1G78070, AT1G30190, AT5G41790, AT2G17820, AT1G68620, AT3G02800, AT4G02590, AT5G49690, AT5G38710, AT2G21660, AT2G20770, AT4G10310, AT5G39785, AT2G21180, AT5G03990, AT1G20440, AT3G14200, AT1…	0.00332896	0.160093
Alpha-amino acid metabolic process	13	AT1G13110, AT1G61065, AT2G15760, AT2G36380, AT2G16760, AT5G12890, AT5G42930, AT3G47570, AT2G46690, AT2G23450, AT5G39050, AT5G21105, AT1G06620	0.00362809	0.165179
Meristem development	21	AT4G00440, AT5G45540, AT3G03770, AT5G40250, AT1G58025, AT5G48740, AT5G43310, AT1G12380, AT3G25560, AT3G50780, AT5G64550, AT5G08260, AT3G59690, AT5G58300, AT5G55530, AT1G76870, AT5G02440, AT5G07920, AT2G41510, AT1G79420, AT1G09960	0.00371439	0.165179
Amino acid transport	12	AT1G58360, AT3G11900, AT1G47670, AT1G25530, AT5G15240, AT5G49630, AT5G57685, AT5G09220, AT1G17120, AT3G30390, AT2G38120, AT1G77380	0.00374697	0.165179
Root development	49	AT5G20540, AT3G27150, AT4G04920, AT2G31280, AT3G53480, AT3G62270, AT2G18470, AT5G60200, AT4G16745, AT5G42930, AT2G28780, AT5G19160, AT3G02260, AT3G50780, AT5G44160, AT1G14820, AT2G20010, AT1G49340, AT1G71692, AT2G26870, AT1G73590, AT5G03610, AT1G55020, AT2G46080, AT5G19970, AT5G63770, AT1G55740, AT2G16980, AT3G22200, AT5G21050, AT3G22400, AT4G16600, AT5G10990, AT2G30933, AT3G60470, AT5G12330, AT2…	0.00426927	0.183117
Seed germination	14	AT5G01930, AT3G22490, AT3G61850, AT4G21540, AT5G66460, AT1G09090, AT3G22942, AT2G18470, AT3G44730, AT5G13200, AT1G09970, AT1G74360, AT5G09810, AT1G75390	0.00519968	0.214774
Signal transduction	86	AT5G22400, AT2G01190, AT1G67940, AT4G27480, AT4G02340, AT5G47580, AT2G36330, AT4G16820, AT1G47890, AT5G63710, AT1G46480, AT1G74790, AT4G12300, AT4G28380, AT5G07920, AT3G09010, AT1G05570, AT3G07470, AT2G28940, AT1G09530, AT4G32790, AT1G08720, AT3G45290, AT5G18370, AT3G48080, AT5G17680, AT4G23050, AT5G44400, AT1G14185, AT2G30840, AT2G35050, AT5G45250, AT3G17950, AT2G39580, AT4G15800, AT5G01750, AT2…	0.005278	0.214774
Cellular response to oxygen-containing compound	42	AT5G25930, AT4G02600, AT3G27210, AT5G15870, AT3G26600, AT1G70530, AT2G20900, AT1G11700, AT2G36330, AT2G39420, AT4G35240, AT4G16820, AT5G12890, AT5G07920, AT1G05570, AT1G76250, AT2G46150, AT2G28840, AT3G47570, AT3G16510, AT2G23450, AT5G39050, AT5G60900, AT2G39435, AT4G28600, AT1G68620, AT5G18310, AT1G32690, AT2G30840, AT2G20010, AT2G19130, AT2G27500, AT1G28200, AT3G19010, AT4G17900, AT2G45910, AT5…	0.00550864	0.218555
Cellular response to hormone stimulus	19	AT3G27210, AT1G68620, AT3G01490, AT2G15760, AT2G30840, AT1G70530, AT5G27690, AT1G17620, AT3G22800, AT2G27500, AT2G39580, AT1G28200, AT1G23710, AT5G41860, AT5G01210, AT5G40720, AT2G23450, AT5G20400, AT5G39050	0.00593786	0.229839
Phloem transport	5	AT2G01950, AT1G06490, AT1G09240, AT1G14920, AT5G57130	0.00646869	0.240065
Nitrate transport	7	AT5G50200, AT1G32450, AT5G14570, AT3G45650, AT3G60320, AT1G22540, AT1G52190	0.00650459	0.240065
Carbohydrate metabolic process	42	AT1G58370, AT3G24180, AT2G34410, AT5G49900, AT3G06550, AT4G17180, AT1G55740, AT2G36870, AT5G14500, AT4G25000, AT1G23460, AT4G36890, AT2G37090, AT5G54570, AT1G61820, AT1G02640, AT3G54420, AT5G20870, AT4G25810, AT3G57510, AT1G09890, AT3G29320, AT3G26610, AT5G14650, AT3G61610, AT5G08370, AT5G24090, AT3G61490, AT2G20770, AT2G27500, AT1G26560, AT5G10560, AT5G03650, AT3G52600, AT1G69830, AT3G13750, AT4…	0.00763862	0.27548
Cellulose biosynthetic process	9	AT4G24010, AT5G44030, AT3G03050, AT3G15480, AT5G17420, AT5G01360, AT5G49720, AT4G18780, AT1G55850	0.00819754	0.27548
Auxin polar transport	9	AT2G26170, AT4G33090, AT1G14350, AT3G02260, AT4G32810, AT2G36910, AT2G38120, AT1G73590, AT3G53480	0.00819754	0.27548
Transmembrane transport	29	AT1G15520, AT3G28345, AT4G18050, AT2G36910, AT5G42210, AT3G59340, AT2G16980, AT1G71960, AT3G53480, AT3G59140, AT1G17840, AT1G02520, AT3G62270, AT2G37170, AT1G53470, AT1G02260, AT1G04120, AT2G28780, AT4G24120, AT1G72820, AT2G17500, AT1G12600, AT3G13080, AT4G18910, AT1G51340, AT5G64410, AT1G76520, AT1G73590, AT5G12080	0.00831517	0.27548
Response to cadmium ion	35	AT2G39920, AT3G52990, AT2G30970, AT3G22200, AT5G44070, AT4G31180, AT1G02500, AT4G34050, AT2G19480, AT5G53460, AT1G52760, AT1G60710, AT1G75040, AT1G77120, AT5G12170, AT1G75280, AT2G26560, AT3G60190, AT3G52880, AT3G22890, AT2G36460, AT5G17920, AT5G60390, AT2G32240, AT4G37870, AT3G16640, AT2G21660, AT5G63400, AT2G44060, AT1G07440, AT3G48990, AT1G54270, AT4G19880, AT3G12500, AT1G04410	0.00865262	0.27548
Regulation of stomatal movement	11	AT5G44790, AT1G62400, AT2G21660, AT1G30270, AT3G51780, AT1G69850, AT1G70410, AT5G26660, AT3G01500, AT2G46370, AT1G65480	0.00883128	0.27548
Fruit dehiscence	5	AT3G57510, AT4G39010, AT2G46770, AT5G66460, AT4G35550	0.00885287	0.27548
Post-embryonic plant morphogenesis	5	AT5G28490, AT2G42610, AT5G03610, AT2G31160, AT1G07090	0.00885287	0.27548
Cell death	9	AT3G16770, AT3G55830, AT4G35090, AT1G28380, AT3G01420, AT3G50930, AT2G26560, AT1G08720, AT5G51290	0.00939742	0.286802
Plant-type cell wall biogenesis	14	AT5G44030, AT5G17420, AT2G44745, AT3G61750, AT1G30620, AT5G58300, AT2G26730, AT3G47510, AT1G22060, AT3G15480, AT1G79420, AT1G09960, AT1G45688, AT4G17220	0.00994073	0.296695
Cell differentiation	64	AT4G00440, AT5G22400, AT3G52470, AT3G59340, AT2G16760, AT1G65480, AT1G17640, AT5G16600, AT2G37980, AT1G22030, AT5G11100, AT5G60720, AT3G47510, AT4G16745, AT1G78230, AT3G07470, AT4G36710, AT4G15093, AT4G37720, AT5G03840, AT2G40230, AT1G67510, AT5G62890, AT5G62370, AT2G46860, AT5G04740, AT1G52150, AT4G36920, AT5G13250, AT1G76460, AT5G40720, AT5G03610, AT3G51680, AT4G02600, AT2G41820, AT3G22560, AT2…	0.0100955	0.296695
Root morphogenesis	37	AT5G24740, AT3G09220, AT5G15870, AT3G59340, AT2G16760, AT3G56230, AT3G52490, AT2G37980, AT3G22800, AT5G11100, AT1G52540, AT4G02090, AT5G05840, AT1G54120, AT1G78230, AT3G07470, AT1G53470, AT2G40230, AT5G47530, AT1G58340, AT1G04280, AT5G42420, AT2G30840, AT2G15220, AT5G61340, AT2G36380, AT5G06390, AT1G48280, AT2G46860, AT2G19130, AT5G04740, AT5G51670, AT5G13250, AT4G30320, AT2G44500, AT5G01210, AT1…	0.0110498	0.310138
Xylan metabolic process	6	AT4G36890, AT2G34410, AT3G06550, AT1G09610, AT3G45010, AT4G09990	0.0111392	0.310138
Positive regulation of cellular biosynthetic process	6	AT1G02630, AT5G47530, AT3G59690, AT1G72160, AT4G29310, AT2G23360	0.0111392	0.310138
Secondary metabolic process	36	AT4G06744, AT3G22560, AT4G39720, AT4G16600, AT4G16820, AT5G63710, AT4G33040, AT1G32900, AT5G12010, AT3G09010, AT2G45360, AT3G28050, AT5G20400, AT5G51160, AT3G63380, AT5G19440, AT5G47530, AT5G39090, AT2G38500, AT2G41810, AT3G27200, AT5G61340, AT5G65660, AT5G11810, AT3G59690, AT1G02630, AT3G16220, AT5G59510, AT2G47710, AT5G61820, AT5G02440, AT5G59050, AT5G39120, AT4G10270, AT2G23360, AT4G33550	0.0120506	0.318172
Plant-type hypersensitive response	13	AT3G54420, AT5G18370, AT5G43470, AT4G24290, AT1G28380, AT5G45250, AT3G01420, AT4G12560, AT3G46530, AT3G07040, AT3G50930, AT3G12500, AT2G26560	0.0121092	0.318172
Response to nematode	13	AT3G11900, AT1G58360, AT1G58340, AT2G30080, AT2G36910, AT2G38120, AT3G27400, AT5G14940, AT3G22600, AT4G17500, AT2G38290, AT1G69850, AT4G32650	0.0121092	0.318172
Small molecule metabolic process	26	AT5G26960, AT2G31940, AT1G70750, AT4G21780, AT5G67470, AT5G57340, AT1G74790, AT2G01300, AT1G76870, AT5G11160, AT3G09010, AT3G07470, AT1G77280, AT5G19440, AT3G53010, AT5G47530, AT5G25940, AT4G28600, AT1G14340, AT2G47710, AT5G61820, AT1G23170, AT3G13330, AT3G19010, AT2G21840, AT1G45688	0.0125425	0.318172
Positive regulation of cellular process	16	AT3G50370, AT3G53010, AT5G47530, AT1G67510, AT1G17450, AT5G61140, AT3G61750, AT5G15870, AT5G53730, AT5G25590, AT2G20320, AT3G17030, AT1G22060, AT5G02640, AT3G08490, AT2G24240	0.0125575	0.318172
UDP-N-acetylglucosamine metabolic process	3	AT1G31070, AT2G35020, AT3G24090	0.012904	0.318172
Regulation of gibberellic acid mediated signaling pathway	3	AT5G66730, AT5G48170, AT3G50700	0.012904	0.318172
Response to oxidative stress	46	AT5G25930, AT1G09000, AT1G68850, AT5G15870, AT4G35090, AT3G59340, AT2G37040, AT3G22200, AT3G53260, AT3G01420, AT1G35910, AT1G49670, AT1G74790, AT1G49570, AT1G52760, AT1G27100, AT2G01980, AT5G05340, AT1G78230, AT4G33420, AT5G42930, AT5G06730, AT1G09970, AT3G03190, AT3G63380, AT1G75280, AT1G06620, AT5G65380, AT5G47650, AT1G03190, AT1G68620, AT1G11050, AT5G16990, AT2G15760, AT2G37130, AT5G42180, AT2…	0.0130316	0.318172
Fruit development	10	AT4G36890, AT4G13330, AT4G31160, AT5G02030, AT5G37020, AT1G48090, AT5G25590, AT3G22200, AT3G56680, AT5G19160	0.0146002	0.351068
Regulation of lignin biosynthetic process	5	AT3G15050, AT5G49660, AT5G16600, AT4G12350, AT4G39410	0.0151786	0.35953
Shoot system morphogenesis	9	AT4G00440, AT4G37560, AT5G20540, AT5G48800, AT5G40460, AT2G41820, AT1G79420, AT1G48090, AT5G08260	0.01553	0.362443
Plant epidermis development	33	AT3G52470, AT5G22400, AT5G26960, AT2G41820, AT5G15870, AT3G59340, AT2G16980, AT2G16760, AT3G22800, AT5G11100, AT4G02090, AT1G54120, AT1G78230, AT1G53470, AT2G40230, AT2G38500, AT3G07570, AT3G50120, AT2G30840, AT2G15220, AT5G61340, AT3G01810, AT5G11810, AT4G20140, AT1G52155, AT2G21840, AT5G57830, AT4G31330, AT5G13250, AT2G44500, AT4G30420, AT1G72160, AT1G45688	0.0158776	0.365185
Water transport	6	AT4G00430, AT2G37170, AT3G25560, AT1G80760, AT4G01470, AT4G20140	0.0164807	0.373641
Defense response to oomycetes	12	AT5G10530, AT2G37710, AT1G15520, AT3G48080, AT5G24530, AT5G42120, AT3G55550, AT1G18670, AT4G10500, AT5G12170, AT5G06740, AT1G08720	0.0176116	0.393656
Response to auxin	33	AT2G04160, AT2G33860, AT1G14350, AT4G35987, AT2G36910, AT4G32810, AT2G36210, AT5G57560, AT5G10990, AT5G12330, AT3G50410, AT2G46690, AT4G32690, AT2G33310, AT1G14185, AT3G01490, AT3G02260, AT2G17500, AT2G38120, AT1G30330, AT2G34680, AT5G67480, AT1G67050, AT5G63160, AT1G69160, AT1G74660, AT4G29080, AT1G50030, AT1G76520, AT5G07990, AT5G37020, AT3G16500, AT5G09810	0.0186328	0.405699
Positive regulation of secondary cell wall biogenesis	4	AT5G03170, AT2G18060, AT1G12260, AT1G17950	0.0186616	0.405699
Regulation of shoot system development	5	AT1G49340, AT5G35750, AT5G49660, AT4G36710, AT5G48170	0.0191835	0.405924
Methionine biosynthetic process	5	AT3G63250, AT2G44160, AT1G49820, AT3G22740, AT5G17920	0.0191835	0.405924
Photoperiodism	6	AT4G11670, AT2G40080, AT4G35900, AT5G61140, AT4G35090, AT1G18610	0.0196951	0.410862
Carbohydrate transport	13	AT1G06470, AT5G42420, AT5G23660, AT1G12600, AT5G65000, AT4G15200, AT2G28315, AT4G10850, AT4G15920, AT5G33320, AT5G62850, AT1G06890, AT4G35300	0.0199347	0.410862
Response to ethylene	19	AT3G03450, AT1G58250, AT1G15520, AT2G38820, AT5G44790, AT5G19790, AT1G58440, AT4G32940, AT1G05690, AT2G38120, AT5G64550, AT1G14920, AT5G10200, AT3G16770, AT5G53560, AT1G27100, AT5G13330, AT2G25490, AT1G08720	0.0205487	0.418086
Cell wall biogenesis	18	AT5G49900, AT2G14620, AT4G25810, AT1G12380, AT1G62330, AT1G32740, AT3G56230, AT2G36870, AT1G17620, AT4G29310, AT5G67470, AT5G57560, AT1G69680, AT5G57830, AT5G59050, AT5G13250, AT5G02640, AT1G72160	0.0223342	0.444032
Nitrate assimilation	8	AT5G37600, AT5G53460, AT5G50200, AT4G35270, AT5G14570, AT1G69850, AT3G45650, AT2G26690	0.0232702	0.444032
Iron ion homeostasis	8	AT4G37650, AT1G15960, AT1G58340, AT1G01580, AT4G34600, AT3G08040, AT4G03390, AT4G16370	0.0232702	0.444032
Recognition of pollen	8	AT4G21380, AT2G19130, AT4G21390, AT1G61370, AT4G27290, AT1G34300, AT4G03230, AT1G11300	0.0232702	0.444032
Negative gravitropism	6	AT4G37650, AT5G46860, AT2G36810, AT1G31480, AT2G26890, AT5G14090	0.023294	0.444032
Response to jasmonic acid	44	AT1G15520, AT5G18860, AT1G55020, AT3G27210, AT4G06744, AT1G67420, AT3G22560, AT3G58790, AT3G59340, AT1G17620, AT2G39420, AT5G46050, AT3G16770, AT3G22800, AT1G32900, AT2G01300, AT5G12890, AT1G78230, AT5G42930, AT2G46370, AT1G78070, AT3G50660, AT4G32940, AT5G48960, AT1G11050, AT3G26330, AT1G12380, AT1G32690, AT5G20190, AT5G67300, AT5G11810, AT5G67480, AT1G19180, AT5G59510, AT4G37670, AT4G15800, AT5…	0.0237059	0.444032
Maintenance of meristem identity	5	AT2G19580, AT5G20540, AT5G48800, AT3G52490, AT2G35350	0.0237824	0.444032
Salicylic acid catabolic process	3	AT5G24530, AT4G10500, AT2G37040	0.0246613	0.449856
Inflorescence morphogenesis	3	AT2G17040, AT4G29900, AT3G02260	0.0246613	0.449856
Induced systemic resistance, jasmonic acid mediated signaling pathway	4	AT2G41370, AT5G47220, AT2G46370, AT1G42540	0.0253488	0.457142
Lignin catabolic process	5	AT2G38080, AT3G09220, AT2G37040, AT5G60020, AT2G40370	0.0289927	0.516982
Response to toxic substance	7	AT2G15490, AT5G35750, AT4G01070, AT5G51160, AT3G63380, AT5G39050, AT4G29210	0.0311442	0.546814
Chemical homeostasis	6	AT3G27150, AT5G53110, AT2G41820, AT2G21840, AT5G13250, AT5G51160	0.0316993	0.546814
Gibberellin biosynthetic process	6	AT2G32440, AT4G25420, AT2G36690, AT4G21200, AT1G78440, AT5G25900	0.0316993	0.546814
Protein targeting to vacuole	8	AT5G24740, AT1G30900, AT3G50380, AT1G48090, AT4G17140, AT3G53720, AT5G03840, AT2G26890	0.0325194	0.554927
Response to hydrogen peroxide	10	AT1G52760, AT2G01980, AT1G05690, AT4G35090, AT4G21870, AT1G77120, AT5G67480, AT1G07400, AT4G12570, AT5G63160	0.0343954	0.569716
Phosphatidylinositol phosphorylation	5	AT1G49340, AT2G46500, AT1G71010, AT5G21050, AT5G54390	0.0348261	0.569716
Secondary shoot formation	5	AT2G26170, AT4G32810, AT5G02030, AT1G77300, AT5G61480	0.0348261	0.569716
Response to hypoxia	14	AT1G68620, AT2G15760, AT1G53910, AT5G49690, AT2G47710, AT2G16060, AT2G27500, AT5G54960, AT2G31810, AT5G39890, AT1G77120, AT4G32690, AT2G46550, AT2G46495	0.0350407	0.569716
Plant-type cell wall organization or biogenesis	16	AT5G47530, AT5G49900, AT2G41610, AT1G62330, AT3G50780, AT1G32740, AT5G62890, AT3G56230, AT1G17620, AT4G29310, AT4G15800, AT5G57830, AT5G59050, AT5G13250, AT5G02640, AT1G72160	0.035365	0.569716
Anatomical structure maturation	13	AT3G07570, AT3G22560, AT4G27480, AT5G15870, AT2G16760, AT5G06390, AT2G46860, AT4G02090, AT1G78230, AT3G07470, AT2G44500, AT5G01210, AT2G40230	0.0355399	0.569716
Plant-type primary cell wall biogenesis	6	AT4G24010, AT5G44030, AT3G03050, AT5G17420, AT4G18780, AT1G55850	0.0365272	0.579687
Cellular response to organic cyclic compound	10	AT5G25930, AT2G27500, AT2G30720, AT2G46150, AT2G44500, AT5G01210, AT3G47570, AT5G44820, AT5G60900, AT2G39420	0.0373743	0.583793
Response to chitin	39	AT5G25930, AT2G32210, AT5G47220, AT4G24050, AT5G49520, AT2G29060, AT5G15870, AT4G01250, AT1G17620, AT2G17040, AT1G27200, AT3G61460, AT3G19540, AT1G27100, AT5G03680, AT3G09010, AT3G47570, AT3G16510, AT2G24240, AT3G23160, AT1G30190, AT1G64065, AT5G40460, AT1G80450, AT2G35930, AT1G11050, AT5G67300, AT3G02800, AT4G17500, AT2G23320, AT2G27500, AT4G15800, AT2G18060, AT3G19010, AT4G17900, AT1G23710, AT4…	0.0378443	0.583793
Abscisic acid-activated signaling pathway	27	AT1G15520, AT3G56850, AT4G04920, AT4G35987, AT1G71960, AT5G66780, AT2G38310, AT3G17980, AT2G18470, AT5G12010, AT3G50310, AT1G08720, AT3G55830, AT1G78070, AT5G41790, AT2G17820, AT5G67300, AT1G66140, AT5G61820, AT4G37790, AT5G13530, AT1G18890, AT3G07360, AT1G08970, AT1G80730, AT2G46680, AT1G15080	0.0378895	0.583793
Arsenite transport	3	AT4G18910, AT5G44070, AT4G10380	0.0392866	0.599499
Oxoacid metabolic process	27	AT3G29970, AT4G02860, AT5G49900, AT1G11700, AT5G27690, AT5G46250, AT1G22030, AT5G53560, AT3G19000, AT1G78230, AT3G45010, AT2G42610, AT1G02260, AT3G63380, AT2G38500, AT5G25940, AT3G28650, AT3G59010, AT4G11780, AT4G37670, AT1G20480, AT4G21215, AT1G70780, AT5G04740, AT1G06650, AT4G16490, AT4G10270	0.0409599	0.618169
Amino acid transmembrane transport	5	AT3G11900, AT5G09220, AT3G30390, AT2G38120, AT1G77380	0.0412892	0.618169
Regulation of salicylic acid mediated signaling pathway	6	AT1G18670, AT4G24290, AT5G67300, AT1G28380, AT4G02590, AT1G08720	0.0417824	0.619708
Regulation of reactive oxygen species metabolic process	6	AT1G61660, AT3G03450, AT2G01980, AT2G46370, AT1G14920, AT3G10500	0.0474702	0.697547
Protein homooligomerization	5	AT5G55000, AT5G23660, AT4G15920, AT5G62850, AT2G24240	0.0483833	0.704443
Phosphorylation	27	AT1G66910, AT3G01840, AT4G21540, AT2G17530, AT4G03230, AT3G21510, AT3G01300, AT2G23950, AT5G55560, AT1G29740, AT1G78530, AT1G24030, AT3G09010, AT2G28940, AT1G77280, AT2G23450, AT1G66920, AT3G57710, AT5G48740, AT1G11050, AT3G20830, AT4G35030, AT4G37250, AT4G29180, AT5G38210, AT1G76360, AT5G51290	0.0492722	0.710864
MRNA transcription	4	AT5G28490, AT2G42610, AT2G31160, AT1G07090	0.0519967	0.736775
L-phenylalanine biosynthetic process	4	AT1G08250, AT5G16600, AT4G12350, AT2G22250	0.0519967	0.736775
Suberin biosynthetic process	5	AT5G58860, AT5G41040, AT3G11430, AT4G34100, AT1G17840	0.0561052	0.757759
Dipeptide transport	3	AT3G54140, AT1G22540, AT5G46050	0.0563425	0.757759
Abscisic acid transport	3	AT1G15520, AT1G69850, AT1G71960	0.0563425	0.757759
Lipid oxidation	3	AT1G55020, AT1G67560, AT3G22400	0.0563425	0.757759
Strigolactone biosynthetic process	3	AT4G36470, AT4G32810, AT3G21420	0.0563425	0.757759
Secretion by cell	3	AT4G03510, AT5G13530, AT5G57685	0.0563425	0.757759
Response to glucose	8	AT4G37220, AT1G74670, AT3G63210, AT5G61760, AT1G76550, AT3G22550, AT4G35300, AT3G26090	0.0576747	0.767082
Regulation of defense response	46	AT5G25930, AT4G02600, AT5G15870, AT3G26600, AT2G20900, AT2G37980, AT4G16820, AT5G63930, AT4G35580, AT1G74790, AT2G01300, AT1G27100, AT5G12890, AT1G76250, AT2G28940, AT3G47570, AT4G32570, AT3G16510, AT2G23450, AT5G39050, AT5G60900, AT2G24240, AT3G45290, AT1G66920, AT3G27960, AT1G80450, AT1G68620, AT5G18310, AT1G11050, AT3G02800, AT4G02590, AT2G19130, AT1G19180, AT2G27500, AT1G28200, AT3G13330, AT1…	0.0580024	0.767082
Anther development	7	AT5G06839, AT2G23950, AT5G12330, AT1G77300, AT5G50670, AT1G08320, AT1G60800	0.0599014	0.784261
Regulation of flower development	12	AT5G41380, AT5G24655, AT2G40080, AT4G37250, AT4G28190, AT5G03680, AT3G18990, AT5G35750, AT4G35900, AT1G68640, AT4G38180, AT1G65480	0.0602898	0.784261
Negative regulation of innate immune response	4	AT4G14465, AT3G55560, AT1G17980, AT2G28550	0.0629745	0.805973
Peptidyl-proline hydroxylation to 4-hydroxy-L-proline	4	AT4G33910, AT1G20270, AT3G28480, AT5G18900	0.0629745	0.805973
Developmental growth	51	AT4G00440, AT3G52470, AT1G09980, AT3G56230, AT2G37980, AT5G53460, AT3G15480, AT1G78230, AT3G07470, AT4G32790, AT5G24010, AT3G61750, AT4G29310, AT2G20770, AT4G37250, AT5G13530, AT5G57830, AT5G59050, AT5G13250, AT5G39380, AT3G51680, AT4G02600, AT1G48090, AT4G16600, AT5G54130, AT1G52540, AT4G02090, AT5G66600, AT5G05840, AT1G53470, AT5G22820, AT1G15410, AT1G12380, AT3G07570, AT5G61140, AT1G17230, AT5…	0.068359	0.867886
Response to bacterium	22	AT3G54420, AT1G11580, AT1G78070, AT1G04280, AT5G24530, AT5G49520, AT5G67500, AT4G10500, AT1G29240, AT3G18260, AT5G49690, AT5G59510, AT1G74790, AT1G01580, AT2G26440, AT4G31550, AT2G46170, AT5G03760, AT1G20990, AT3G50930, AT4G10270, AT1G08720	0.0708116	0.886808
Seed maturation	7	AT2G38820, AT2G17820, AT5G23660, AT5G66730, AT5G58070, AT2G45360, AT4G30935	0.0721131	0.886808
Oxylipin biosynthetic process	5	AT1G55020, AT1G67560, AT3G22400, AT3G01420, AT2G26560	0.0733976	0.886808
Regulation of phenylpropanoid metabolic process	4	AT1G55270, AT3G23590, AT5G16600, AT4G12350	0.0749235	0.886808
Positive regulation of response to salt stress	4	AT3G17980, AT1G14350, AT1G76040, AT5G58070	0.0749235	0.886808
Negative regulation of stomatal complex development	3	AT1G20160, AT1G70410, AT3G01500	0.0754373	0.886808
Protein kinase C-activating G-protein coupled receptor signaling pathway	3	AT5G07920, AT5G63770, AT2G20900	0.0754373	0.886808
Cellular potassium ion homeostasis	3	AT5G24270, AT1G04120, AT3G53720	0.0754373	0.886808
Meristem determinacy	3	AT4G28190, AT1G65480, AT5G03840	0.0754373	0.886808
Anatomical structure development	3	AT1G08290, AT1G51220, AT3G57670	0.0754373	0.886808
Defense response to other organism	56	AT1G80280, AT3G52470, AT1G03080, AT4G24050, AT4G31940, AT4G17080, AT3G59340, AT1G70750, AT4G02340, AT5G46250, AT1G14730, AT5G57340, AT1G27200, AT3G47510, AT4G16745, AT3G07470, AT3G45010, AT2G45360, AT3G45290, AT5G42420, AT5G24010, AT2G30840, AT2G15220, AT1G29240, AT5G64550, AT5G49690, AT2G20010, AT3G46530, AT5G40720, AT5G01750, AT5G49900, AT4G02600, AT5G22580, AT3G58790, AT5G66440, AT5G63930, AT1…	0.0785935	0.917117
Cell tip growth	5	AT4G12420, AT1G52155, AT4G29180, AT3G02050, AT3G50120	0.0829411	0.953823
Response to desiccation	5	AT1G44170, AT1G48130, AT5G25610, AT2G44060, AT2G21620	0.0829411	0.953823
Cell wall macromolecule catabolic process	4	AT3G54420, AT2G36870, AT3G12500, AT3G16920	0.0877866	0.973059
Phenylpropanoid metabolic process	4	AT2G30490, AT3G23590, AT3G21240, AT5G60020	0.0877866	0.973059
Starch metabolic process	4	AT3G55760, AT3G18660, AT5G03650, AT4G18240	0.0877866	0.973059
Mitochondrial fission	4	AT5G22350, AT1G60500, AT4G33650, AT3G60190	0.0877866	0.973059
Response to arsenic-containing substance	4	AT4G18910, AT4G13180, AT5G44070, AT4G10380	0.0877866	0.973059
Immune system process	23	AT1G66920, AT5G25930, AT1G13110, AT1G68620, AT5G18310, AT1G70530, AT3G02800, AT2G37980, AT4G16820, AT2G27500, AT4G15800, AT5G66600, AT5G39785, AT1G23710, AT1G76360, AT2G28940, AT2G46150, AT3G16510, AT2G23450, AT3G63380, AT5G39050, AT2G24240, AT3G45290	0.0882927	0.973059
Response to alcohol	13	AT2G32210, AT5G49900, AT5G46720, AT5G18980, AT4G27480, AT5G15870, AT1G29240, AT5G46250, AT3G16220, AT2G19130, AT1G74790, AT4G08290, AT3G09010	0.0891443	0.975669
Floral meristem determinacy	5	AT2G41370, AT2G33860, AT1G62360, AT4G28190, AT2G15790	0.0930592	1
Response to oomycetes	5	AT5G43470, AT2G34930, AT5G24530, AT4G35987, AT4G10500	0.0930592	1
Photomorphogenesis	9	AT1G74660, AT1G75540, AT3G02260, AT2G36910, AT5G24470, AT4G32980, AT2G46370, AT1G80730, AT1G73590	0.0961465	1
Vacuolar protein processing	3	AT4G32940, AT5G24350, AT1G62710	0.0962208	1
Positive regulation of abscisic acid biosynthetic process	3	AT3G28455, AT1G50030, AT4G18780	0.0962208	1
Xylan acetylation	3	AT2G34410, AT3G06550, AT2G40320	0.0962208	1
Cell surface receptor signaling pathway	8	AT3G57710, AT1G21230, AT1G16130, AT3G26600, AT4G35920, AT2G23450, AT3G01300, AT5G15080	0.0989822	1
Potassium ion transport	8	AT2G30070, AT5G53130, AT4G10310, AT3G02050, AT2G40540, AT5G41610, AT3G53720, AT5G46240	0.0989822	1
Lateral root formation	8	AT1G55020, AT4G13510, AT3G02260, AT2G38120, AT2G17500, AT5G49660, AT3G22400, AT3G20860	0.0989822	1
Regulation of cell shape	6	AT3G08840, AT5G45970, AT1G06490, AT2G13680, AT1G05570, AT4G16340	0.0993762	1
Response to heat	21	AT1G15520, AT1G58340, AT1G78080, AT1G03190, AT4G35987, AT5G22060, AT1G71960, AT5G67300, AT4G21870, AT2G38750, AT1G09090, AT4G36990, AT5G57560, AT1G68090, AT1G16030, AT1G74310, AT1G20440, AT5G58070, AT5G35460, AT2G28840, AT1G07400	0.0999857	1

## Sheet: Cluster5
GO term	Number of genes	Genes	PValue	Benjamini
Plant-type cell wall biogenesis	18	AT1G13250, AT1G80350, AT5G47820, AT5G15650, AT3G49720, AT3G08900, AT1G64390, AT3G17430, AT5G58300, AT3G63120, AT4G12730, AT1G29980, AT5G64740, AT3G11590, AT4G18030, AT4G32410, AT2G03220, AT1G77260	6.86024e-07	0.000865076
Meiotic cell cycle process	20	AT1G11120, AT3G24660, AT1G18650, AT5G64310, AT4G28230, AT5G66860, AT1G30630, AT4G28100, AT5G62710, AT3G20015, AT4G36360, AT5G12440, AT2G05920, AT5G09760, AT2G19090, AT2G46380, AT4G39790, AT1G69910, AT2G46780, AT2G45340	3.92773e-06	0.00247643
Cytokinesis	13	AT4G33945, AT1G55360, AT3G04470, AT4G28230, AT3G20015, AT3G17840, AT5G11640, AT5G10020, AT2G19090, AT4G16650, AT1G69910, AT2G45340, AT5G59020	8.44264e-06	0.00354872
Cell division	43	AT1G11120, AT2G28150, AT3G24660, AT3G58690, AT1G14830, AT3G63120, AT3G18730, AT5G13520, AT5G11780, AT2G18290, AT2G05920, AT1G29980, AT5G10150, AT4G13710, AT3G51740, AT1G53050, AT1G74690, AT3G06740, AT5G67260, AT3G05870, AT1G55690, AT5G65420, AT5G35520, AT5G62710, AT5G58300, AT3G10180, AT4G36360, AT4G12730, AT5G10020, AT5G05010, AT5G50340, AT2G46380, AT3G48210, AT5G40740, AT4G39790, AT2G47990, AT1…	1.34647e-05	0.00424473
Response to cadmium ion	32	AT1G13440, AT5G17330, AT3G25230, AT5G15650, AT2G30970, AT2G17630, AT3G22960, AT2G36530, AT4G22670, AT3G01860, AT2G41380, AT1G02920, AT1G60710, AT2G01140, AT4G39660, AT1G07810, AT1G75280, AT5G18170, AT1G12000, AT5G42020, AT2G30060, AT1G34550, AT2G36460, AT2G19940, AT5G17920, AT3G18190, AT1G79930, AT2G41530, AT2G27020, AT3G15730, AT3G12500, AT5G02500	6.83561e-05	0.0172394
Glycolytic process	12	AT5G56350, AT1G13440, AT4G24620, AT2G36460, AT2G01140, AT1G47840, AT1G74030, AT3G22960, AT1G16300, AT2G29560, AT2G36530, AT2G22480	0.000118186	0.0248387
Plant-type cell wall cellulose biosynthetic process	6	AT1G77460, AT2G44610, AT1G28490, AT5G60920, AT2G41770, AT4G16120	0.000344458	0.0577345
Intra-Golgi vesicle-mediated transport	9	AT5G11980, AT2G36900, AT4G04910, AT5G10260, AT1G52360, AT2G44610, AT4G31480, AT1G30630, AT4G34450	0.000366278	0.0577345
Virus induced gene silencing	5	AT1G48410, AT5G23570, AT1G05460, AT3G49500, AT2G27880	0.000640785	0.089781
Hyperosmotic salinity response	10	AT4G24960, AT1G74520, AT1G05260, AT5G59820, AT1G69700, AT3G20290, AT4G32410, AT3G14080, AT2G41130, AT5G46050	0.000821247	0.103559
Microtubule cytoskeleton organization	10	AT5G19780, AT3G17840, AT1G20090, AT1G75780, AT1G80350, AT1G71440, AT5G12250, AT5G40740, AT1G01510, AT2G45340	0.00152164	0.174436
Plant-type secondary cell wall biogenesis	14	AT1G33170, AT2G36570, AT5G16720, AT5G67210, AT4G37540, AT3G14360, AT3G17730, AT4G36360, AT3G16630, AT2G05920, AT1G77130, AT2G04780, AT1G27600, AT5G59020	0.0017016	0.178809
Radial pattern formation	5	AT2G32560, AT1G60030, AT5G46700, AT5G08391, AT1G64390	0.00196169	0.190284
Developmental growth	43	AT1G60030, AT1G55360, AT1G63220, AT5G24580, AT1G64390, AT4G22130, AT5G12950, AT3G16850, AT1G78610, AT3G14350, AT5G54850, AT3G11320, AT3G11760, AT2G46490, AT1G75680, AT5G38560, AT2G22480, AT3G29180, AT3G06740, AT2G30060, AT5G22790, AT1G55690, AT1G04040, AT1G63430, AT1G35220, AT3G53190, AT1G67570, AT1G30630, AT2G16250, AT3G17430, AT3G60380, AT4G12730, AT5G10020, AT3G13275, AT3G11590, AT2G28310, AT5…	0.00227458	0.204875
Cytoplasmic microtubule organization	5	AT5G06680, AT1G80260, AT1G80350, AT3G53760, AT5G17410	0.00265105	0.222865
Spindle assembly	7	AT5G06680, AT1G80260, AT5G54670, AT3G53760, AT5G17410, AT5G40740, AT2G41350	0.00290572	0.229007
Auxin metabolic process	5	AT5G26600, AT1G51760, AT1G48410, AT1G55320, AT5G14420	0.00348981	0.245431
Floral organ development	6	AT4G20270, AT5G65700, AT5G10020, AT1G55690, AT3G53190, AT4G39790	0.00350338	0.245431
Base-excision repair	6	AT5G57970, AT3G48425, AT3G47830, AT2G36490, AT5G26680, AT1G75090	0.00504048	0.325117
Regulation of cell shape	7	AT4G35020, AT1G20090, AT5G13000, AT3G14570, AT1G77460, AT1G01510, AT4G16340	0.00525177	0.325117
Shoot system morphogenesis	8	AT5G62710, AT1G63430, AT1G65650, AT2G19090, AT5G06710, AT4G22730, AT1G69910, AT5G59350	0.00544766	0.325117
Regulation of vacuole fusion, non-autophagic	3	AT1G74030, AT2G29560, AT2G36530	0.00567215	0.325117
Cellular amino acid biosynthetic process	6	AT3G29200, AT3G10050, AT5G34930, AT3G23940, AT4G39980, AT1G15710	0.00596491	0.327033
Methylation	21	AT3G27230, AT1G13860, AT4G25630, AT1G33170, AT1G13790, AT3G49720, AT1G29790, AT5G25480, AT5G64030, AT5G66440, AT5G17920, AT5G44170, AT1G26850, AT2G41380, AT2G23380, AT1G20330, AT5G37990, AT4G18030, AT4G19120, AT2G43320, AT1G77260	0.00717519	0.376996
Microtubule nucleation	4	AT5G06680, AT1G80260, AT3G53760, AT5G17410	0.00815726	0.398791
Embryo development ending in seed dormancy	41	AT1G80260, AT5G24400, AT1G60870, AT3G24660, AT3G54650, AT5G14220, AT3G61520, AT5G66860, AT5G48230, AT4G22970, AT1G14610, AT1G55900, AT1G43170, AT2G05920, AT1G71440, AT1G79860, AT3G16810, AT4G20060, AT3G10920, AT3G05870, AT5G40480, AT1G55690, AT1G67730, AT1G34550, AT4G32720, AT1G63430, AT1G19850, AT1G32930, AT2G16250, AT1G48175, AT4G13940, AT1G48410, AT3G47520, AT5G05950, AT2G19090, AT1G53580, AT2…	0.00822249	0.398791
Meristem development	15	AT3G30300, AT4G00340, AT5G40250, AT3G24660, AT1G63430, AT3G53190, AT1G19850, AT1G52565, AT5G58630, AT5G58300, AT3G17840, AT5G62960, AT2G19090, AT2G41890, AT1G69910	0.00887276	0.411584
Microtubule-based movement	9	AT3G10180, AT5G54670, AT3G16630, AT3G45850, AT5G47820, AT5G06670, AT1G55550, AT3G16060, AT1G01950	0.00913906	0.411584
Vesicle-mediated transport	19	AT2G36900, AT4G04910, AT4G22970, AT3G03800, AT2G38360, AT5G24170, AT1G10630, AT2G20780, AT3G15380, AT1G03900, AT1G52360, AT3G50860, AT1G47830, AT5G41950, AT4G31480, AT1G04760, AT4G16340, AT4G34450, AT1G05785	0.0102964	0.447718
Multidimensional cell growth	6	AT1G80350, AT5G64740, AT3G27000, AT1G20330, AT4G32410, AT5G60920	0.0108582	0.456407
Cell cycle	17	AT5G48820, AT5G67260, AT3G05870, AT2G28150, AT3G02820, AT5G65420, AT1G14830, AT3G63120, AT2G18290, AT5G10150, AT3G62980, AT3G48210, AT1G01225, AT2G47990, AT1G72160, AT4G37630, AT3G48160	0.0118523	0.474569
Pseudouridine synthesis	5	AT5G35400, AT3G52260, AT5G14460, AT1G20430, AT3G57150	0.012399	0.474569
Protein phosphorylation	47	AT1G11440, AT4G00340, AT1G56130, AT3G24240, AT3G24660, AT3G56370, AT5G63650, AT4G22730, AT2G36570, AT4G03390, AT3G57120, AT3G58690, AT5G18525, AT4G22130, AT4G38830, AT3G17840, AT3G44200, AT1G79620, AT3G14350, AT4G27290, AT2G44830, AT3G51740, AT1G53050, AT5G38560, AT2G45340, AT1G33260, AT1G63430, AT1G26150, AT5G47070, AT1G28390, AT1G48480, AT2G16250, AT2G18890, AT2G02800, AT5G62710, AT5G58300, AT1…	0.0124193	0.474569
Tissue development	40	AT1G60030, AT1G63220, AT5G24580, AT1G18650, AT5G62580, AT4G28230, AT5G16720, AT1G64390, AT3G20015, AT5G12950, AT2G05920, AT1G29980, AT3G15680, AT3G14350, AT3G11320, AT5G06710, AT3G51740, AT1G74690, AT2G45340, AT3G29180, AT1G13970, AT1G04040, AT1G35220, AT1G67570, AT1G72500, AT4G28100, AT1G28390, AT5G62710, AT3G18960, AT3G14360, AT3G62160, AT3G17730, AT5G56220, AT5G38610, AT5G19090, AT3G09780, AT5…	0.0131649	0.488262
Fruit development	8	AT2G42370, AT5G40010, AT3G11590, AT2G21060, AT3G51740, AT4G16650, AT5G10920, AT5G60910	0.0135647	0.488718
Cell differentiation	44	AT4G20270, AT2G34710, AT2G18900, AT5G24580, AT3G22440, AT2G16980, AT1G12310, AT4G22130, AT5G12950, AT3G14350, AT3G11320, AT1G22610, AT1G20970, AT5G37055, AT3G09070, AT1G77260, AT3G29180, AT5G59020, AT1G61870, AT1G55690, AT5G42340, AT1G63430, AT1G35220, AT1G67570, AT5G15800, AT3G17430, AT5G54240, AT4G12730, AT5G65700, AT5G10020, AT1G48410, AT5G38610, AT3G11590, AT5G50340, AT2G23380, AT5G11070, AT4…	0.0170811	0.595888
Response to heat	18	AT3G53990, AT1G15520, AT5G42020, AT1G13440, AT5G23570, AT3G25230, AT5G22060, AT5G64310, AT5G53400, AT4G21320, AT4G02450, AT1G48050, AT3G07930, AT1G71790, AT1G79930, AT5G59820, AT2G29500, AT5G02500	0.0176282	0.595888
Retrograde vesicle-mediated transport, Golgi to ER	6	AT3G07950, AT5G10260, AT5G05010, AT1G52360, AT2G44610, AT1G30630	0.017957	0.595888
Mitotic cell cycle	8	AT5G35520, AT5G06680, AT5G19780, AT1G80260, AT1G75780, AT3G53760, AT5G12250, AT5G17410	0.0190875	0.617163
Transmembrane transport	20	AT4G27730, AT1G15520, AT2G38940, AT3G28860, AT3G25620, AT2G39970, AT1G30450, AT4G00290, AT5G64970, AT2G16980, AT3G59140, AT3G62270, AT1G73020, AT3G15380, AT2G37170, AT1G03900, AT1G78610, AT2G38060, AT3G04090, AT2G46890	0.0209748	0.635441
Cellular manganese ion homeostasis	4	AT3G43660, AT2G01770, AT1G07810, AT4G27860	0.0216917	0.635441
Protein folding	14	AT5G42020, AT5G22060, AT5G53400, AT2G30410, AT3G62600, AT5G62390, AT4G02450, AT3G18190, AT3G16110, AT5G56000, AT4G12400, AT2G29500, AT1G24510, AT5G02500	0.0220571	0.635441
Actin filament organization	7	AT4G35020, AT1G71790, AT1G20090, AT1G60430, AT3G27000, AT3G56480, AT2G26770	0.0221724	0.635441
Exocytosis	7	AT1G10180, AT1G10380, AT2G44610, AT4G22970, AT5G41950, AT1G28490, AT3G03800	0.0221724	0.635441
Nitrogen compound metabolic process	5	AT5G11520, AT3G20330, AT5G12040, AT2G34470, AT5G18170	0.0228058	0.639068
Leaf morphogenesis	8	AT2G01940, AT1G69780, AT1G48410, AT5G53400, AT3G49720, AT2G23380, AT5G67100, AT1G01510	0.0241456	0.64273
Cortical microtubule organization	7	AT5G23720, AT1G27850, AT1G80350, AT3G44200, AT5G64740, AT3G53760, AT4G28540	0.0242213	0.64273
ER to Golgi vesicle-mediated transport	10	AT3G25040, AT5G42570, AT2G36900, AT5G05010, AT1G52360, AT4G31480, AT1G30630, AT4G34450, AT1G05785, AT5G58030	0.0244655	0.64273
Recombinational repair	3	AT5G56220, AT5G50340, AT4G25120	0.0259514	0.654494
Acetyl-CoA biosynthetic process	3	AT1G09430, AT5G49460, AT1G60810	0.0259514	0.654494
Protein transport	26	AT5G47960, AT5G65270, AT4G32910, AT3G03800, AT5G11980, AT3G15380, AT5G05680, AT1G47830, AT1G04760, AT3G25040, AT4G27730, AT2G30060, AT5G40480, AT2G36900, AT1G55690, AT4G04910, AT5G47510, AT4G09720, AT1G30630, AT5G24170, AT5G05010, AT3G50860, AT5G55190, AT3G56900, AT5G09810, AT1G01200	0.0266545	0.659045
Fucose metabolic process	6	AT3G30300, AT3G21190, AT4G24530, AT5G15740, AT4G16650, AT2G28100	0.0334321	0.794444
Negative regulation of DNA endoreduplication	3	AT2G18290, AT1G20330, AT3G48160	0.0352806	0.794444
DNA damage checkpoint	3	AT1G52530, AT1G25580, AT1G77620	0.0352806	0.794444
Purine ribonucleoside salvage	3	AT4G12440, AT1G71750, AT5G03300	0.0352806	0.794444
L-serine biosynthetic process	3	AT1G17745, AT2G17630, AT4G34200	0.0352806	0.794444
Macromolecule modification	6	AT5G62710, AT5G58300, AT1G56130, AT3G24660, AT1G14590, AT2G16250	0.0399894	0.880843
Regulation of cellular component organization	5	AT5G62710, AT3G17840, AT3G14000, AT1G63430, AT2G16250	0.0415855	0.880843
Unidimensional cell growth	14	AT3G03220, AT1G63430, AT5G19530, AT4G22970, AT5G66680, AT2G16250, AT4G22130, AT4G12730, AT1G75780, AT3G45970, AT4G27060, AT3G11590, AT1G77460, AT3G46290	0.0418171	0.880843
Developmental growth involved in morphogenesis	6	AT5G58300, AT3G14350, AT1G20970, AT4G28230, AT5G60910, AT5G24910	0.0435403	0.880843
Response to endoplasmic reticulum stress	6	AT3G16110, AT3G07950, AT5G42020, AT5G11340, AT1G77350, AT5G48580	0.0435403	0.880843
Cellular response to oxidative stress	6	AT2G05590, AT1G07380, AT3G09640, AT4G00290, AT5G20500, AT4G35000	0.0435403	0.880843
Carbohydrate derivative metabolic process	13	AT3G07950, AT5G25510, AT5G22790, AT1G56210, AT1G68300, AT5G24580, AT4G29680, AT1G30630, AT4G22130, AT3G17430, AT3G62110, AT1G75680, AT1G77260	0.0440072	0.880843
Cell wall organization	21	AT4G01220, AT1G13250, AT5G23870, AT5G15650, AT1G32860, AT1G70630, AT3G08900, AT1G64390, AT1G70710, AT1G19360, AT5G13000, AT5G64740, AT3G14570, AT5G03760, AT1G77130, AT4G32410, AT2G03220, AT1G75680, AT1G49710, AT1G27600, AT5G55480	0.047394	0.92812
RNA processing	9	AT2G17580, AT1G24450, AT1G13030, AT5G14580, AT4G32720, AT5G14460, AT5G23690, AT2G29670, AT3G57150	0.0478412	0.92812
Malate metabolic process	4	AT2G47510, AT3G47520, AT1G79750, AT5G12040	0.0490749	0.937629
Chaperone-mediated protein folding	4	AT3G53990, AT3G25230, AT5G48580, AT5G48570	0.055901	1
Regulation of auxin polar transport	5	AT4G38430, AT2G01940, AT3G15380, AT5G11790, AT4G02450	0.0560378	1
Plant organ morphogenesis	10	AT5G54240, AT2G28150, AT5G10020, AT1G55690, AT2G33620, AT5G10150, AT2G19090, AT5G57390, AT4G37750, AT5G59020	0.0597907	1
Stomatal closure	4	AT1G15520, AT2G31870, AT2G39050, AT5G02500	0.0631513	1
Phloem development	5	AT4G20270, AT3G01680, AT3G15380, AT3G28455, AT3G09070	0.0669853	1
TRNA processing	5	AT5G35400, AT4G21900, AT5G14580, AT1G20430, AT5G25480	0.0669853	1
Polyadenylation-dependent snoRNA 3'-end processing	3	AT3G46210, AT2G32415, AT3G61620	0.0692749	1
Arginine biosynthetic process	3	AT2G37500, AT4G24830, AT2G19940	0.0692749	1
Glutamate metabolic process	3	AT5G11520, AT5G17330, AT2G30970	0.0692749	1
Cytoskeleton-dependent intracellular transport	3	AT5G47820, AT1G55550, AT1G01950	0.0692749	1
Response to cold	27	AT3G49260, AT1G15520, AT5G40010, AT3G24440, AT1G05260, AT1G49480, AT2G36530, AT2G22840, AT1G78610, AT5G59820, AT5G12250, AT3G53990, AT4G21150, AT4G24960, AT3G56200, AT2G37230, AT2G39730, AT2G37770, AT4G35790, AT4G10030, AT3G61350, AT1G74520, AT3G47520, AT5G11790, AT2G21060, AT2G27020, AT5G02500	0.0693771	1
Response to inorganic substance	39	AT5G47960, AT2G38710, AT3G03980, AT3G51000, AT4G29680, AT5G60460, AT3G04710, AT3G17840, AT5G53560, AT1G29980, AT4G13710, AT3G11320, AT5G12470, AT1G13170, AT2G27510, AT2G43320, AT2G22480, AT4G34450, AT1G77260, AT5G66170, AT2G30060, AT5G22790, AT3G26430, AT1G04040, AT1G66100, AT2G40600, AT3G22790, AT4G31810, AT1G30630, AT1G28390, AT3G02740, AT1G21050, AT4G36680, AT3G13275, AT5G54860, AT5G04020, AT5…	0.0706114	1
Gene silencing by RNA	7	AT3G49250, AT1G48410, AT5G23570, AT1G13790, AT3G49500, AT5G43810, AT2G27880	0.0707536	1
DNA duplex unwinding	4	AT3G05740, AT3G09660, AT1G60930, AT4G25120	0.0708118	1
Regulation of meristem structural organization	4	AT3G18730, AT5G65700, AT5G43810, AT5G46700	0.0708118	1
Regionalization	5	AT3G56810, AT1G11120, AT3G53190, AT4G39790, AT2G45340	0.0728439	1
Embryo sac development	8	AT3G11964, AT1G01690, AT1G15440, AT1G14360, AT4G30930, AT1G31660, AT3G23940, AT2G47990	0.0776474	1
Phosphatidylcholine metabolic process	3	AT4G35790, AT3G15730, AT3G15820	0.0822578	1
Import across plasma membrane	2	AT1G15520, AT3G56200	0.0863656	1
Positive regulation of microtubule nucleation	2	AT5G06680, AT5G17410	0.0863656	1
Galacturonate biosynthetic process	2	AT4G30440, AT3G23820	0.0863656	1
Fatty acid alpha-oxidation	2	AT5G17380, AT3G01420	0.0863656	1
Glucose metabolic process	4	AT3G47800, AT1G13440, AT1G16300, AT3G17940	0.0873004	1
Response to ethylene	12	AT3G05420, AT4G22360, AT1G15520, AT5G08560, AT5G26600, AT4G38495, AT5G56220, AT2G01930, AT5G53560, AT3G51550, AT5G11070, AT3G04720	0.0944325	1
Cell morphogenesis	6	AT1G71790, AT5G58300, AT1G20090, AT5G18410, AT3G27000, AT3G14350	0.0946649	1
Gluconeogenesis	4	AT1G13440, AT4G24620, AT2G36460, AT2G01140	0.0960951	1
Response to virus	5	AT5G04890, AT1G21250, AT2G27880, AT5G02500, AT3G04720	0.0987376	1

## Sheet: Cluster6
GO term	Number of genes	Genes	PValue	Benjamini
Cell division	108	AT5G67270, AT3G56870, AT3G62630, AT1G57820, AT2G02910, AT5G03040, AT4G13710, AT3G08680, AT3G51740, AT5G55280, AT3G60900, AT1G07270, AT1G30690, AT5G48520, AT2G42260, AT5G39740, AT5G62410, AT3G19210, AT4G39790, AT5G02520, AT2G43990, AT3G03680, AT1G61260, AT5G41460, AT2G33400, AT5G40770, AT5G43080, AT3G51280, AT1G01110, AT1G74690, AT2G42110, AT4G13370, AT1G05950, AT5G45550, AT3G25100, AT3G25980, AT1…	8.8925e-21	1.51439e-17
DNA replication initiation	17	AT1G44900, AT4G29910, AT1G07270, AT5G16690, AT3G25100, AT1G67630, AT5G46280, AT4G02060, AT5G49010, AT2G16440, AT1G80190, AT1G26840, AT2G20980, AT4G14700, AT5G44635, AT2G01120, AT2G07690	4.77956e-13	4.06979e-10
Fatty acid biosynthetic process	39	AT3G05020, AT5G67070, AT1G55020, AT1G66430, AT5G42650, AT1G11600, AT1G19640, AT1G68530, AT4G12700, AT5G46290, AT4G20870, AT2G34770, AT1G49430, AT5G05580, AT3G43110, AT4G13710, AT4G16360, AT1G04220, AT1G54580, AT2G26640, AT5G04530, AT2G06050, AT5G47630, AT1G43800, AT5G52920, AT2G30200, AT3G16170, AT1G65290, AT5G60335, AT1G01120, AT1G74960, AT1G24360, AT2G28630, AT2G43710, AT5G10160, AT5G35360, AT3…	3.52929e-12	2.00346e-09
Mitotic cell cycle	25	AT1G80260, AT1G63100, AT3G57060, AT4G21820, AT5G05620, AT3G54710, AT4G15890, AT5G23860, AT1G08260, AT5G40460, AT1G09450, AT1G68400, AT2G38185, AT3G59550, AT4G14310, AT2G24970, AT1G47200, AT5G11550, AT1G50010, AT3G60660, AT3G61650, AT5G01450, AT2G45490, AT1G03780, AT2G27960	1.2175e-10	4.35371e-08
Microtubule-based movement	26	AT1G63640, AT1G59540, AT3G23670, AT3G54870, AT4G39050, AT5G27550, AT1G18550, AT3G19050, AT2G37420, AT1G72250, AT5G02370, AT3G17360, AT3G43210, AT3G20150, AT3G10310, AT5G23910, AT4G21270, AT3G49650, AT5G66310, AT2G36200, AT1G20060, AT5G60930, AT1G18370, AT2G22610, AT3G44050, AT4G14330	1.27825e-10	4.35371e-08
Meiotic cell cycle process	35	AT3G56870, AT3G27330, AT1G18650, AT5G49120, AT5G57700, AT1G72610, AT2G37960, AT2G37300, AT1G68350, AT1G11125, AT1G01110, AT4G39900, AT5G51560, AT4G33400, AT5G55180, AT5G01420, AT1G65900, AT3G02120, AT1G07570, AT5G40460, AT1G68400, AT3G05470, AT1G67750, AT5G14230, AT5G64310, AT1G64080, AT5G48480, AT1G30510, AT4G36360, AT4G36180, AT3G60660, AT3G20260, AT4G17240, AT4G39790, AT1G25510	3.15447e-09	8.95343e-07
Response to karrikin	34	AT3G21090, AT5G17050, AT2G34650, AT1G33590, AT3G55120, AT2G37040, AT1G17200, AT3G02870, AT1G74670, AT5G63810, AT2G23910, AT4G13510, AT5G53660, AT2G36080, AT5G64620, AT5G11260, AT4G34710, AT1G06520, AT5G05600, AT5G51810, AT3G52360, AT4G30400, AT5G40780, AT4G27030, AT2G47730, AT2G47930, AT5G05270, AT5G13750, AT4G37370, AT5G08640, AT4G27280, AT2G26250, AT1G01300, AT5G42900	7.87665e-09	1.91628e-06
Flavonoid biosynthetic process	20	AT4G25640, AT3G51240, AT5G48100, AT3G55120, AT5G24530, AT1G34790, AT4G09820, AT3G59030, AT1G64390, AT5G13930, AT5G05270, AT2G45400, AT5G08640, AT5G07990, AT1G44760, AT4G34850, AT2G47460, AT3G52500, AT1G61720, AT2G40890	2.17672e-08	4.63368e-06
Fatty acid metabolic process	26	AT1G60590, AT5G16340, AT1G55320, AT5G23050, AT4G20870, AT2G17650, AT2G34770, AT1G49430, AT2G47240, AT1G08640, AT3G48460, AT5G55180, AT1G01630, AT1G43800, AT1G68500, AT4G22300, AT3G16170, AT4G27030, AT2G45970, AT1G53520, AT2G43710, AT2G41475, AT4G15440, AT3G15730, AT5G19290, AT3G63170	9.65865e-08	1.82763e-05
Mitotic cell cycle phase transition	14	AT1G15570, AT2G17620, AT4G03270, AT5G65420, AT1G16330, AT5G43080, AT5G11300, AT1G47230, AT4G34160, AT1G76310, AT1G70210, AT1G44110, AT2G26760, AT3G11520	2.62736e-06	0.000439353
Pre-replicative complex assembly involved in nuclear cell cycle DNA replication	7	AT1G44900, AT5G16690, AT5G46280, AT4G02060, AT5G44635, AT2G16440, AT2G07690	2.83787e-06	0.000439353
DNA replication	22	AT1G08260, AT4G29910, AT1G07270, AT5G16690, AT2G29570, AT4G18590, AT5G52950, AT1G65470, AT2G16440, AT4G24790, AT1G80190, AT1G09815, AT1G26840, AT1G21690, AT5G08020, AT4G14700, AT1G08840, AT2G40550, AT2G01120, AT3G54710, AT2G21790, AT3G27060	7.706e-06	0.00102985
Stomatal complex development	14	AT2G30370, AT5G01910, AT3G02120, AT3G07320, AT2G16630, AT2G15430, AT2G20875, AT1G67040, AT5G66230, AT4G12970, AT4G12540, AT4G36180, AT4G37810, AT2G05760	7.86143e-06	0.00102985
Double-strand break repair via break-induced replication	8	AT1G44900, AT3G25100, AT5G46280, AT4G02060, AT5G44635, AT4G16970, AT2G16440, AT2G07690	9.17072e-06	0.00111555
Cell cycle	37	AT5G67270, AT5G22220, AT4G02060, AT4G03270, AT1G16330, AT5G43080, AT3G51280, AT5G11300, AT1G47230, AT5G13840, AT1G70210, AT3G60670, AT1G76310, AT5G02470, AT4G30010, AT2G26760, AT5G55280, AT3G11520, AT1G08560, AT5G40460, AT1G30690, AT3G51670, AT3G08880, AT1G15570, AT5G51750, AT5G65420, AT5G62170, AT4G14310, AT1G67180, AT4G33270, AT4G34160, AT1G44110, AT5G02420, AT2G27960, AT2G44740, AT5G59790, AT1…	1.03401e-05	0.00117395
Regulation of cyclin-dependent protein serine/threonine kinase activity	15	AT1G15570, AT2G17620, AT4G03270, AT5G65420, AT1G16330, AT5G43080, AT5G11300, AT1G47230, AT4G34160, AT1G76310, AT1G70210, AT1G44110, AT2G26760, AT2G44740, AT3G11520	3.0533e-05	0.00313964
Plant-type cell wall organization or biogenesis	28	AT3G03680, AT1G11000, AT5G41140, AT1G10070, AT3G57400, AT5G47380, AT1G55840, AT4G22010, AT2G27930, AT5G03040, AT1G05835, AT3G63200, AT3G17120, AT4G00820, AT2G22560, AT2G46330, AT1G41830, AT1G32170, AT2G42800, AT5G66310, AT1G52855, AT1G48330, AT2G41290, AT4G35690, AT4G15800, AT5G11550, AT2G03350, AT1G76160	3.1341e-05	0.00313964
Cytokinesis by cell plate formation	15	AT4G00100, AT5G51600, AT4G08630, AT5G66410, AT3G19050, AT5G18700, AT4G14310, AT5G55230, AT3G17360, AT1G18370, AT3G43210, AT1G50240, AT3G61650, AT5G05620, AT1G53140	5.11052e-05	0.00480691
Response to auxin	51	AT3G60650, AT5G54510, AT4G09460, AT3G42660, AT5G45800, AT2G47460, AT2G22240, AT5G20820, AT1G64640, AT3G28910, AT5G47390, AT5G13930, AT2G42580, AT5G20810, AT4G14550, AT2G34650, AT5G24520, AT3G55120, AT2G14960, AT5G22220, AT5G40770, AT4G23820, AT2G21210, AT3G15540, AT2G01200, AT1G54200, AT3G12670, AT1G53230, AT1G72430, AT1G75580, AT5G18050, AT5G56590, AT5G18030, AT1G31040, AT1G28130, AT3G51290, AT3…	5.36297e-05	0.00480691
Stomatal complex morphogenesis	7	AT3G61650, AT5G05620, AT2G26330, AT1G04110, AT5G62230, AT5G07180, AT1G80080	6.75277e-05	0.00574998
Lipid catabolic process	32	AT3G54950, AT5G45960, AT1G29670, AT4G37070, AT1G33811, AT4G26790, AT1G75900, AT3G16370, AT3G61680, AT1G71120, AT3G63200, AT3G48460, AT2G42990, AT5G33370, AT2G04570, AT2G26560, AT5G03820, AT1G09390, AT5G45670, AT5G45950, AT3G26430, AT5G14450, AT3G03310, AT1G53920, AT1G71691, AT5G08460, AT2G23540, AT4G18550, AT3G11210, AT3G04290, AT3G15730, AT5G55050	9.05725e-05	0.007345
Cytokinesis	16	AT2G26180, AT3G02120, AT2G42800, AT3G05470, AT3G27330, AT5G49120, AT4G23740, AT5G11510, AT3G63430, AT3G20260, AT4G17240, AT5G51560, AT5G55180, AT5G01420, AT1G25510, AT1G65900	0.000121696	0.00942039
Cytoplasmic translation	14	AT5G24510, AT1G07070, AT3G05560, AT3G53740, AT4G17390, AT1G33140, AT3G06680, AT1G67430, AT2G19740, AT1G72370, AT4G36130, AT1G74050, AT2G40010, AT1G74270	0.000214785	0.0159034
Tissue development	80	AT5G23850, AT4G24130, AT1G09380, AT4G26830, AT3G56870, AT5G40230, AT1G18650, AT4G08685, AT3G22142, AT5G49120, AT5G25590, AT2G18980, AT1G68470, AT3G25930, AT1G64390, AT5G67350, AT5G12950, AT4G38650, AT2G39690, AT1G10657, AT3G08680, AT5G06710, AT5G51560, AT3G51740, AT5G04970, AT2G47140, AT1G04040, AT1G68400, AT5G15780, AT3G26330, AT5G60150, AT2G01913, AT5G62170, AT5G48480, AT4G14310, AT3G61790, AT1…	0.000236317	0.0167686
Anatomical structure arrangement	10	AT1G52720, AT3G56870, AT3G07320, AT1G68400, AT5G25590, AT2G05760, AT1G64080, AT1G62500, AT5G66560, AT1G11125	0.000315442	0.0214879
Lipid metabolic process	33	AT5G16460, AT1G62290, AT3G55360, AT3G22960, AT4G22010, AT1G75900, AT4G13990, AT3G44540, AT3G61680, AT5G55480, AT2G46210, AT2G26560, AT5G03820, AT3G54200, AT5G66590, AT5G20110, AT5G18590, AT5G52920, AT1G09390, AT5G16010, AT1G14020, AT3G51970, AT3G02040, AT5G26230, AT1G11910, AT3G03310, AT1G68260, AT3G44830, AT1G49740, AT3G47860, AT3G16120, AT3G11210, AT4G33790	0.000449878	0.029467
Leaf development	30	AT5G43020, AT4G24150, AT4G31840, AT1G29010, AT5G25590, AT1G67040, AT4G14720, AT5G53660, AT2G22840, AT5G28640, AT1G53230, AT5G05620, AT1G04020, AT3G13960, AT4G18960, AT4G37740, AT3G50660, AT1G15690, AT1G31040, AT3G61970, AT5G53950, AT5G47390, AT1G65470, AT1G64080, AT1G69180, AT5G64630, AT3G61650, AT2G42840, AT2G42200, AT4G18750	0.000641601	0.0404684
DNA unwinding involved in DNA replication	8	AT1G44900, AT5G08020, AT1G27880, AT5G46280, AT4G02060, AT5G44635, AT2G16440, AT2G07690	0.000748345	0.0434722
Mitotic chromosome condensation	5	AT5G48600, AT5G37630, AT3G57060, AT2G32590, AT4G15890	0.000750427	0.0434722
Regionalization	11	AT1G26740, AT1G52720, AT2G26180, AT5G43970, AT5G15780, AT3G20260, AT1G44760, AT4G39790, AT1G67040, AT1G25510, AT1G11125	0.000765806	0.0434722
Cell wall organization or biogenesis	28	AT2G37300, AT1G29050, AT1G10850, AT1G70370, AT1G22330, AT3G08680, AT1G07750, AT1G44760, AT5G59480, AT2G23110, AT2G47440, AT1G77260, AT1G38131, AT5G16010, AT4G18380, AT3G25400, AT1G17430, AT3G56060, AT5G07080, AT2G34560, AT4G14310, AT4G14750, AT5G28150, AT2G40980, AT4G30420, AT3G12600, AT1G45688, AT1G76160	0.000809738	0.0444833
Plant-type cell wall loosening	11	AT5G39280, AT2G39700, AT2G03090, AT1G20190, AT1G73360, AT2G40610, AT4G28250, AT1G65680, AT3G29030, AT2G37640, AT5G66460	0.000968295	0.0515314
Meiotic cell cycle	16	AT5G48600, AT3G48190, AT3G03770, AT1G80260, AT4G24710, AT3G22880, AT1G34355, AT5G08020, AT3G63430, AT1G01370, AT5G62410, AT3G63200, AT2G45280, AT5G01630, AT5G02520, AT1G64625	0.0010311	0.0532113
Syncytium formation	7	AT1G14520, AT2G39700, AT2G03090, AT2G40610, AT4G28250, AT4G26260, AT2G37640	0.00109688	0.054941
Stomatal complex patterning	6	AT5G08120, AT4G12970, AT2G15430, AT2G20875, AT4G14770, AT1G80080	0.00148374	0.0721944
Carbohydrate metabolic process	55	AT4G26830, AT1G60590, AT3G57240, AT3G54690, AT5G08380, AT3G07820, AT3G18080, AT5G12950, AT4G38650, AT1G48100, AT1G02460, AT1G05850, AT2G28100, AT3G54420, AT5G58090, AT3G55430, AT4G34700, AT5G24090, AT4G34260, AT4G36360, AT2G44480, AT3G20440, AT2G01630, AT4G19800, AT3G48950, AT1G53240, AT4G30420, AT3G12700, AT2G05790, AT3G12500, AT3G07320, AT4G23820, AT4G21760, AT3G57260, AT5G57123, AT5G63810, AT5…	0.00169666	0.0802613
Cuticle development	9	AT1G27950, AT3G43720, AT1G01120, AT1G02205, AT1G68530, AT3G55360, AT5G33370, AT2G26250, AT1G17840	0.00209915	0.0966175
Protein folding	26	AT4G24190, AT3G60210, AT3G23990, AT5G09590, AT5G26360, AT3G56070, AT3G02530, AT5G60640, AT5G13120, AT5G20720, AT2G28000, AT2G32120, AT1G56260, AT1G14980, AT3G07770, AT1G56340, AT3G03773, AT1G53540, AT3G13470, AT5G12020, AT2G29960, AT4G34960, AT1G01940, AT1G54050, AT2G46000, AT1G21750	0.00236934	0.105159
Response to wounding	92	AT5G47740, AT5G23850, AT5G67150, AT3G52870, AT1G61120, AT5G42650, AT3G49940, AT4G02340, AT1G17840, AT5G14700, AT2G20340, AT1G52720, AT4G16740, AT4G21865, AT4G14720, AT2G28900, AT3G48520, AT1G07750, AT3G43270, AT5G02230, AT4G34138, AT2G43540, AT2G06050, AT1G77260, AT1G06620, AT3G54420, AT4G24220, AT5G50200, AT1G66100, AT3G26330, AT3G01930, AT4G24380, AT1G30135, AT4G22880, AT2G36780, AT5G24090, AT5…	0.00240822	0.105159
Lipid biosynthetic process	31	AT2G30150, AT5G15350, AT3G29670, AT5G57800, AT3G62630, AT4G20870, AT1G34640, AT2G37300, AT2G34770, AT4G33580, AT5G11420, AT3G18950, AT1G02205, AT3G08680, AT4G00820, AT5G01320, AT3G12870, AT1G35180, AT1G06620, AT3G02580, AT3G09730, AT3G06868, AT3G44735, AT3G25700, AT4G14750, AT2G45970, AT2G36290, AT2G43710, AT3G27050, AT2G26250, AT2G46000	0.00302963	0.128496
Seed coat development	10	AT5G67360, AT2G45970, AT1G24260, AT1G17260, AT1G05230, AT4G09820, AT5G15740, AT3G13540, AT2G37260, AT2G22900	0.00309355	0.128496
Response to herbivore	7	AT5G23960, AT4G16740, AT1G61120, AT3G45140, AT2G44300, AT4G15210, AT3G04720	0.00323813	0.131298
Lignin biosynthetic process	12	AT4G37980, AT5G48930, AT4G37990, AT5G66390, AT5G48100, AT5G05340, AT1G67980, AT2G28670, AT4G39330, AT1G05850, AT2G40890, AT5G54160	0.00333892	0.132012
Oxylipin biosynthetic process	8	AT1G55020, AT3G14110, AT5G42650, AT1G19640, AT3G45140, AT3G15850, AT2G06050, AT2G26560	0.00348829	0.132012
Trichome differentiation	8	AT5G24520, AT5G52600, AT5G64630, AT4G09820, AT3G13540, AT1G65470, AT5G41315, AT5G55480	0.00348829	0.132012
Pollen development	37	AT4G25640, AT2G36850, AT1G80560, AT5G46795, AT4G02060, AT5G18700, AT2G37040, AT4G02080, AT2G16440, AT2G21870, AT1G75520, AT2G43040, AT2G01200, AT3G43210, AT3G48520, AT4G29170, AT4G16760, AT5G48720, AT5G41170, AT2G31210, AT5G26850, AT2G41830, AT3G59530, AT2G38185, AT1G34355, AT1G65470, AT3G59550, AT3G23840, AT1G26840, AT1G18370, AT4G36180, AT5G64630, AT3G18000, AT5G01450, AT5G50260, AT2G07050, AT3…	0.00409035	0.151432
Double-strand break repair via homologous recombination	14	AT1G18800, AT4G21070, AT1G65470, AT3G23255, AT5G08020, AT1G07745, AT1G27880, AT5G64630, AT3G19210, AT1G04020, AT2G45280, AT2G28560, AT5G20850, AT5G01630	0.00475262	0.172207
Glucosinolate metabolic process	23	AT3G60900, AT5G47740, AT5G66590, AT1G62520, AT5G41460, AT1G11050, AT4G21760, AT3G06868, AT1G34640, AT1G64390, AT3G25700, AT3G18080, AT1G52720, AT1G78860, AT2G22840, AT3G17120, AT1G09310, AT5G52020, AT2G41475, AT3G55700, AT1G25510, AT2G46330, AT1G41830	0.00535208	0.189887
Growth	22	AT5G20110, AT5G44680, AT3G02110, AT1G14020, AT5G15350, AT1G68400, AT1G64640, AT4G23820, AT1G72610, AT3G28857, AT2G17230, AT5G07080, AT5G12930, AT5G57550, AT4G09460, AT2G05810, AT5G03120, AT3G52500, AT1G74690, AT1G04430, AT4G16563, AT1G77260	0.00558209	0.19354
DNA repair	31	AT5G52910, AT3G48190, AT2G31320, AT4G18590, AT3G05480, AT3G22880, AT4G24790, AT1G52500, AT3G46940, AT1G27880, AT1G08840, AT1G04020, AT2G45280, AT3G20490, AT1G78790, AT5G07400, AT2G28560, AT3G15620, AT3G27060, AT2G22260, AT3G12610, AT5G48720, AT1G08260, AT4G21070, AT5G24850, AT5G46740, AT1G21690, AT5G08020, AT1G07745, AT1G16590, AT4G17760	0.00573753	0.19354
Tyrosine catabolic process	4	AT1G06570, AT1G12050, AT5G53970, AT5G36160	0.00579598	0.19354
Pectin catabolic process	18	AT4G02330, AT3G07970, AT5G20860, AT5G19730, AT5G47500, AT1G67750, AT4G24780, AT5G53370, AT1G53840, AT5G07430, AT4G13710, AT3G43270, AT3G14310, AT5G04970, AT5G04310, AT3G29090, AT2G26450, AT2G45220	0.00630401	0.206456
Cellular component biogenesis	30	AT5G50810, AT4G25740, AT3G49680, AT2G37020, AT2G39020, AT4G23860, AT1G29050, AT5G08380, AT1G10850, AT4G12540, AT3G08680, AT1G44760, AT2G23110, AT2G40010, AT4G31460, AT5G47630, AT2G26180, AT3G02120, AT5G65860, AT1G52855, AT1G64080, AT1G12500, AT1G70600, AT1G26740, AT4G35690, AT2G37080, AT5G60210, AT4G15000, AT5G42700, AT4G33110	0.0065549	0.210559
Microtubule cytoskeleton organization	13	AT5G23860, AT5G51600, AT3G01450, AT1G68400, AT1G19980, AT4G23740, AT4G15830, AT5G55230, AT1G50010, AT3G61650, AT5G05620, AT3G08680, AT2G45490	0.00667657	0.210559
Jasmonic acid biosynthetic process	8	AT1G55020, AT3G25780, AT5G42650, AT2G43710, AT1G19640, AT3G45140, AT4G16760, AT2G06050	0.00710378	0.219959
Unsaturated fatty acid biosynthetic process	7	AT5G05580, AT3G12120, AT1G74960, AT2G43710, AT2G18950, AT4G27030, AT3G15850	0.0075441	0.229421
Mitotic spindle assembly checkpoint	5	AT1G77720, AT3G25980, AT5G05510, AT2G20635, AT2G33560	0.00789623	0.23185
Mitotic sister chromatid segregation	5	AT1G64960, AT5G48600, AT5G07590, AT3G61650, AT5G05620	0.00789623	0.23185
Meristem development	24	AT3G03680, AT5G45540, AT3G03770, AT5G43020, AT5G18460, AT3G05980, AT3G57030, AT2G12462, AT4G23740, AT4G23860, AT1G64080, AT5G66560, AT3G61920, AT1G70280, AT5G01090, AT1G54200, AT3G61670, AT2G28410, AT2G31920, AT2G05760, AT1G62500, AT2G41990, AT5G06900, AT1G65900	0.00825308	0.23822
Anther development	10	AT1G75520, AT3G02130, AT5G14070, AT4G24972, AT3G48520, AT2G02850, AT5G50670, AT2G42200, AT1G02065, AT1G68480	0.00912435	0.258979
Regulation of meristem structural organization	7	AT3G50870, AT1G76540, AT4G24190, AT3G22780, AT1G04020, AT1G65470, AT1G20930	0.00962072	0.265411
Negative regulation of cellular process	35	AT3G54750, AT5G43020, AT4G31840, AT3G56870, AT1G67320, AT1G16630, AT1G67040, AT3G51280, AT2G25735, AT3G60670, AT3G08680, AT5G01660, AT4G02800, AT5G37010, AT3G12870, AT5G01420, AT4G31360, AT1G05950, AT2G26180, AT3G55950, AT5G16250, AT3G27640, AT1G04040, AT1G68400, AT3G23740, AT3G25882, AT1G14700, AT5G66230, AT5G65360, AT4G14310, AT1G18010, AT3G60660, AT5G03870, AT4G14490, AT5G42700	0.00966264	0.265411
Response to jasmonic acid	57	AT5G67150, AT3G50770, AT1G61120, AT5G42650, AT1G55840, AT1G30700, AT4G16740, AT4G19810, AT2G28900, AT1G07750, AT3G43270, AT5G02230, AT2G43540, AT1G77260, AT3G56400, AT3G55950, AT3G50660, AT1G66100, AT5G17760, AT3G26330, AT4G20860, AT3G25882, AT4G24380, AT4G22880, AT5G13930, AT5G07010, AT4G15800, AT5G13210, AT1G21550, AT4G14110, AT5G21105, AT2G32990, AT1G15520, AT5G16340, AT1G55020, AT3G27810, AT1…	0.0101462	0.271034
Cell wall biogenesis	23	AT1G32170, AT5G44670, AT5G41140, AT4G03210, AT4G25810, AT3G57400, AT4G13090, AT1G64640, AT5G47380, AT1G11545, AT1G10550, AT5G57550, AT1G02730, AT2G27930, AT5G13870, AT5G03040, AT1G01050, AT3G17120, AT3G11210, AT4G14130, AT2G03350, AT2G46330, AT1G41830	0.0101856	0.271034
Wax biosynthetic process	8	AT1G49430, AT1G01120, AT1G02205, AT1G68530, AT5G57800, AT3G55360, AT2G47240, AT4G33790	0.0107104	0.271516
Epidermal cell fate specification	4	AT5G24520, AT1G79840, AT2G37260, AT5G41315	0.0108415	0.271516
DNA replication checkpoint	4	AT5G52910, AT3G05480, AT3G54710, AT1G02970	0.0108415	0.271516
Proanthocyanidin biosynthetic process	4	AT5G48100, AT1G17260, AT3G59030, AT4G22880	0.0108415	0.271516
Lateral root formation	12	AT1G49430, AT1G18800, AT3G18830, AT1G55020, AT4G13510, AT1G15570, AT5G05730, AT4G37070, AT3G59420, AT5G10510, AT3G53180, AT2G01505	0.0121584	0.300085
Cell morphogenesis involved in differentiation	6	AT4G00460, AT1G68400, AT3G11590, AT3G50120, AT1G62440, AT3G08680	0.0127668	0.306105
Multicellular organismal reproductive process	6	AT3G42860, AT2G26180, AT4G09060, AT3G51740, AT2G37960, AT5G01420	0.0127668	0.306105
Microtubule-based process	8	AT5G20110, AT3G22190, AT5G23860, AT1G54510, AT1G50010, AT3G16120, AT4G27360, AT5G55280	0.0129416	0.306105
Unidimensional cell growth	25	AT5G39280, AT3G51160, AT5G22400, AT2G39700, AT2G03090, AT1G15385, AT2G40610, AT4G28250, AT5G54510, AT1G68530, AT1G65680, AT2G37640, AT3G19820, AT1G20190, AT4G37580, AT3G08680, AT5G51810, AT3G50660, AT3G01015, AT1G21270, AT3G18000, AT1G75750, AT3G11590, AT3G29030, AT5G54380	0.0146853	0.34259
Chitin catabolic process	7	AT3G54420, AT4G19820, AT4G19810, AT4G19800, AT1G05850, AT5G24090, AT3G12500	0.0149361	0.343732
Organic hydroxy compound metabolic process	9	AT4G14750, AT5G20110, AT5G18590, AT4G33580, AT1G70370, AT1G09390, AT3G11210, AT3G62630, AT4G22010	0.015145	0.343893
Trichome branching	8	AT4G14750, AT2G42260, AT3G01140, AT1G73360, AT3G55360, AT1G64690, AT5G41315, AT4G20780	0.0154879	0.347051
L-phenylalanine catabolic process	5	AT2G20340, AT1G06570, AT1G12050, AT2G37040, AT5G36160	0.01616	0.352826
Specification of floral organ identity	5	AT1G24260, AT3G54340, AT2G45190, AT3G23130, AT1G68480	0.01616	0.352826
Cutin biosynthetic process	6	AT1G49430, AT5G23940, AT2G38110, AT2G47240, AT1G01610, AT1G06520	0.0164317	0.354218
Response to inorganic substance	76	AT5G47740, AT3G03980, AT3G52870, AT1G57540, AT4G10720, AT1G16790, AT2G20820, AT1G16870, AT5G67350, AT2G36770, AT1G16080, AT5G57100, AT5G62420, AT1G42480, AT3G43110, AT4G13710, AT4G30010, AT5G59480, AT1G02460, AT1G77260, AT1G41830, AT2G36620, AT1G04040, AT1G66100, AT5G17760, AT3G16190, AT3G62840, AT3G25882, AT2G32380, AT1G70600, AT2G17120, AT5G28060, AT5G59850, AT1G32910, AT5G13210, AT5G59613, AT3…	0.0172307	0.359867
Response to UV-B	13	AT3G51240, AT3G55120, AT2G37040, AT5G49330, AT5G13930, AT2G42260, AT5G08020, AT1G16590, AT1G75040, AT1G15380, AT5G11260, AT2G47460, AT4G38620	0.0172846	0.359867
Reciprocal meiotic recombination	9	AT1G07745, AT5G23610, AT4G24710, AT4G29170, AT3G19210, AT1G22260, AT3G22880, AT2G45280, AT5G20850	0.0176359	0.359867
Microtubule polymerization	4	AT5G55230, AT5G51600, AT3G61650, AT5G05620	0.0177503	0.359867
Double-strand break repair via synthesis-dependent strand annealing	4	AT3G48190, AT3G19210, AT2G45280, AT5G20850	0.0177503	0.359867
Cell wall modification	14	AT1G19900, AT4G02330, AT5G20860, AT5G19730, AT5G47500, AT5G53370, AT1G53840, AT5G07430, AT3G43270, AT3G14310, AT5G04970, AT3G29090, AT2G26450, AT2G45220	0.0187221	0.368889
Plant-type cell wall organization	14	AT5G39280, AT2G39700, AT2G03090, AT2G40610, AT2G37640, AT1G20190, AT2G46710, AT2G26330, AT1G21310, AT5G06610, AT5G02010, AT3G29030, AT5G04310, AT2G21140	0.0187221	0.368889
Gametophyte development	10	AT5G45550, AT4G14310, AT3G25100, AT1G18370, AT3G43210, AT3G20260, AT2G35605, AT2G39020, AT4G23740, AT3G54710	0.0188452	0.368889
Response to sucrose	13	AT4G29910, AT5G16690, AT4G30850, AT5G20270, AT5G42890, AT5G47390, AT5G65420, AT4G34160, AT1G74670, AT4G37680, AT2G28900, AT2G01120, AT3G12700	0.02127	0.394197
Xyloglucan metabolic process	10	AT1G32170, AT5G57550, AT4G03210, AT5G13870, AT4G25810, AT4G13090, AT1G11545, AT1G68560, AT4G14130, AT1G10550	0.0214531	0.394197
Strand invasion	3	AT1G07745, AT3G22880, AT5G20850	0.0215003	0.394197
Positive regulation of stomatal complex development	3	AT5G11300, AT4G12970, AT1G15570	0.0215003	0.394197
Response to insect	8	AT3G56400, AT5G07690, AT4G16740, AT5G45800, AT1G16670, AT1G74080, AT1G17860, AT2G44300	0.0216092	0.394197
Chromosome condensation	5	AT5G08780, AT5G62410, AT2G30620, AT1G14900, AT4G15890	0.0217584	0.394197
Mitotic spindle organization	5	AT5G60930, AT4G32830, AT3G61650, AT5G05620, AT2G45490	0.0217584	0.394197
Gibberellic acid mediated signaling pathway	14	AT1G15550, AT5G15230, AT2G39540, AT5G66730, AT3G27810, AT1G68320, AT5G59845, AT3G28857, AT1G22690, AT1G74670, AT3G47710, AT1G75750, AT5G11260, AT3G50700	0.0226728	0.40644
Trichome morphogenesis	9	AT5G23940, AT4G00100, AT2G46225, AT5G24310, AT5G22220, AT1G05230, AT3G13540, AT1G64690, AT1G80080	0.0234745	0.416429
Shoot system morphogenesis	10	AT1G01110, AT5G43020, AT5G40460, AT1G54200, AT5G06710, AT1G64080, AT1G62500, AT5G66560, AT3G61920, AT1G11125	0.0243103	0.426808
Cell differentiation	77	AT4G24130, AT5G22400, AT3G60650, AT3G22142, AT5G57700, AT5G66740, AT4G28650, AT1G69120, AT3G22104, AT3G26700, AT5G12950, AT5G57620, AT2G20300, AT4G39900, AT5G04970, AT3G13540, AT2G47140, AT1G02065, AT4G18960, AT1G77260, AT3G55950, AT3G52040, AT3G54340, AT1G08000, AT1G68400, AT5G62170, AT2G45650, AT4G14750, AT3G61790, AT2G28410, AT1G21310, AT2G45050, AT1G51060, AT2G21140, AT1G62500, AT5G55050, AT3…	0.0246253	0.427928
Polysaccharide catabolic process	6	AT4G17090, AT3G54420, AT4G19810, AT4G15210, AT5G24090, AT3G12500	0.0257075	0.435245
Microsporogenesis	7	AT5G45550, AT4G20050, AT2G36850, AT5G18700, AT1G02065, AT5G07280, AT4G15890	0.0262593	0.435245
Cellular amino acid biosynthetic process	7	AT3G49680, AT2G45300, AT1G10070, AT1G48850, AT3G06350, AT3G20390, AT1G14810	0.0262593	0.435245
Leaf shaping	4	AT3G50660, AT3G52770, AT1G73590, AT3G15730	0.0265798	0.435245
Phragmoplast assembly	4	AT3G23670, AT3G61650, AT5G05620, AT5G18700	0.0265798	0.435245
Maintenance of floral organ identity	4	AT5G46880, AT1G05230, AT4G18960, AT4G04890	0.0265798	0.435245
Response to oxidative stress	55	AT2G31320, AT1G63460, AT3G09640, AT3G28200, AT1G05260, AT2G28190, AT3G49940, AT3G17070, AT2G18980, AT1G35910, AT3G23910, AT3G18950, AT5G60640, AT5G05340, AT5G02230, AT1G06620, AT1G56340, AT5G16990, AT4G24380, AT5G13930, AT1G32910, AT1G27330, AT4G15800, AT1G71695, AT3G47860, AT1G44970, AT1G21310, AT5G51890, AT1G13340, AT2G37040, AT2G32030, AT5G12930, AT5G64260, AT3G55280, AT3G16990, AT1G52500, AT2…	0.0273009	0.442795
Regulation of cell division	8	AT1G08260, AT5G22220, AT3G22780, AT2G26330, AT5G62440, AT5G23260, AT5G59790, AT4G20140	0.0336435	0.540517
Cell wall organization	37	AT5G44670, AT2G32990, AT5G48930, AT4G20050, AT2G36850, AT5G22740, AT4G03210, AT5G20260, AT4G28250, AT1G11545, AT4G23740, AT5G08380, AT1G64390, AT3G06260, AT1G78570, AT5G55480, AT5G56590, AT1G32170, AT4G24140, AT1G14020, AT4G25810, AT4G13090, AT1G62440, AT2G18950, AT1G55850, AT4G07960, AT1G68560, AT3G23840, AT3G28857, AT4G20140, AT5G57550, AT1G02730, AT5G60930, AT5G13870, AT4G14130, AT4G31590, AT3…	0.0342147	0.544557
Response to brassinosteroid	9	AT4G34160, AT4G02330, AT3G50660, AT2G26710, AT1G75750, AT5G26230, AT4G08950, AT4G34760, AT5G54380	0.0345838	0.545336
Response to cold	50	AT3G02130, AT3G05880, AT1G05260, AT1G29670, AT1G16670, AT2G37220, AT1G54820, AT2G28900, AT2G22840, AT1G78995, AT1G50460, AT5G11260, AT2G26640, AT5G04530, AT4G02330, AT1G14140, AT5G52300, AT5G24090, AT2G38760, AT1G01120, AT1G53240, AT2G21060, AT5G59010, AT5G42900, AT1G15520, AT5G40010, AT4G24190, AT1G68530, AT3G02870, AT3G57260, AT3G55280, AT4G15950, AT5G57123, AT3G13960, AT4G34710, AT5G38480, AT1…	0.0350767	0.548034
Cell fate commitment	4	AT5G24520, AT1G69180, AT2G45190, AT1G23420	0.0373265	0.567563
Cytoskeleton-dependent cytokinesis	4	AT4G14310, AT4G33400, AT1G12500, AT3G26700	0.0373265	0.567563
Regulation of G2/M transition of mitotic cell cycle	4	AT5G11300, AT1G76540, AT1G15570, AT1G20930	0.0373265	0.567563
Regulation of jasmonic acid mediated signaling pathway	9	AT3G56400, AT2G46400, AT4G14720, AT5G13220, AT2G43710, AT1G15380, AT1G16310, AT1G30135, AT5G05600	0.038963	0.579892
Monoterpene biosynthetic process	3	AT4G38460, AT1G61680, AT3G25810	0.040521	0.579892
Pyrimidine dimer repair	3	AT3G24495, AT4G02070, AT3G15620	0.040521	0.579892
Alkane biosynthetic process	3	AT1G02205, AT2G32720, AT5G57800	0.040521	0.579892
Phragmoplast microtubule organization	3	AT5G48520, AT3G23670, AT3G19050	0.040521	0.579892
Negative regulation of fatty acid biosynthetic process	3	AT4G21070, AT1G04020, AT3G56130	0.040521	0.579892
Salicylic acid catabolic process	3	AT5G24530, AT2G37040, AT4G10490	0.040521	0.579892
Hydrogen peroxide catabolic process	15	AT5G66390, AT3G52960, AT3G09640, AT3G28200, AT1G05260, AT3G17070, AT5G17820, AT2G18980, AT5G34850, AT1G71695, AT5G05340, AT1G44970, AT5G51890, AT5G06730, AT4G16270	0.0418031	0.593256
Response to UV	7	AT3G55120, AT5G63310, AT5G07990, AT1G65060, AT3G15620, AT3G50930, AT3G12610	0.0421758	0.593599
Response to heat	28	AT1G15520, AT4G27720, AT5G19730, AT3G23990, AT1G32583, AT5G09590, AT4G29520, AT5G10010, AT1G52340, AT1G05850, AT5G55160, AT2G32120, AT1G56260, AT1G14980, AT4G26840, AT2G47180, AT5G17760, AT5G64310, AT4G15802, AT3G03773, AT2G38760, AT2G43130, AT1G53540, AT3G47860, AT5G12020, AT1G15380, AT5G12380, AT1G54050	0.0426642	0.59555
Polarity specification of adaxial/abaxial axis	6	AT5G55250, AT1G69180, AT2G45190, AT2G26330, AT2G37630, AT1G23420	0.044926	0.607259
Very long-chain fatty acid biosynthetic process	6	AT1G01120, AT1G67730, AT2G32720, AT3G28910, AT3G55360, AT3G23840	0.044926	0.607259
DNA-dependent DNA replication	6	AT4G14310, AT1G09815, AT1G21690, AT2G40550, AT5G49010, AT4G24790	0.044926	0.607259
Aromatic amino acid family metabolic process	5	AT5G22400, AT1G47480, AT1G80360, AT1G06570, AT1G17330	0.0449293	0.607259
Lateral root development	10	AT3G50060, AT5G16690, AT2G46400, AT4G16515, AT1G47200, AT3G63420, AT5G40770, AT3G60650, AT5G47390, AT1G31880	0.0472606	0.633739
Response to organic cyclic compound	26	AT5G47740, AT1G66910, AT3G50770, AT4G23820, AT3G49940, AT4G22010, AT5G12930, AT5G14700, AT3G62370, AT3G18950, AT5G02230, AT3G50830, AT2G46330, AT3G55950, AT2G15220, AT1G17430, AT2G21200, AT1G32910, AT2G44480, AT4G37690, AT2G43290, AT2G22170, AT2G26695, AT1G62500, AT2G02360, AT1G04430	0.0477367	0.635122
Ribosomal large subunit assembly	7	AT2G36620, AT1G61580, AT5G39740, AT2G44860, AT2G40010, AT1G74050, AT3G55280	0.0485809	0.641344
Response to nutrient levels	4	AT4G32480, AT1G67750, AT1G07650, AT4G33550	0.0499395	0.649213
Microtubule nucleation	4	AT5G55230, AT1G80260, AT3G61650, AT5G05620	0.0499395	0.649213
Response to gibberellin	13	AT5G51810, AT1G15550, AT4G23060, AT5G15230, AT5G47390, AT2G16750, AT2G37640, AT2G34340, AT4G36880, AT2G22840, AT1G75750, AT3G13960, AT5G53280	0.0518128	0.668463
Embryo development	11	AT3G42860, AT4G15630, AT5G51750, AT4G02060, AT2G37020, AT4G35730, AT5G62550, AT3G51740, AT2G39020, AT2G42110, AT2G16440	0.0542368	0.686527
Synapsis	5	AT3G48190, AT4G24710, AT1G22260, AT1G78790, AT1G67370	0.0548254	0.686527
Anther wall tapetum development	5	AT2G31210, AT1G44970, AT4G16270, AT5G50260, AT1G34640	0.0548254	0.686527
Negative regulation of DNA recombination	5	AT5G08780, AT3G24495, AT2G30620, AT1G14900, AT4G02070	0.0548254	0.686527
Nucleosome assembly	8	AT1G18800, AT5G08780, AT5G64630, AT3G45980, AT2G30620, AT2G28720, AT1G14900, AT1G65470	0.0556229	0.691429
Carboxylic acid metabolic process	31	AT5G22400, AT5G16340, AT3G07320, AT1G57540, AT1G10850, AT1G64390, AT5G64260, AT5G24080, AT1G73880, AT1G21680, AT4G15630, AT5G58930, AT5G03040, AT5G53760, AT1G09310, AT2G05540, AT5G55180, AT2G04570, AT1G43710, AT4G23030, AT5G22850, AT2G42800, AT5G16010, AT5G58090, AT2G40620, AT1G66100, AT3G06868, AT3G16490, AT4G13620, AT2G22170, AT4G31130	0.0597634	0.737514
Meristem structural organization	6	AT4G36360, AT5G64630, AT3G08880, AT2G45190, AT1G36160, AT1G69120	0.0614636	0.742682
Terpenoid biosynthetic process	6	AT1G73880, AT1G70370, AT1G26640, AT1G61680, AT2G26930, AT4G15560	0.0614636	0.742682
Anatomical structure formation involved in morphogenesis	7	AT4G37690, AT3G63200, AT3G51740, AT4G02800, AT5G37010, AT1G62500, AT1G76160	0.0630956	0.742682
Meiotic sister chromatid cohesion, centromeric	3	AT5G05510, AT2G20635, AT2G33560	0.0636709	0.742682
Regulation of cytokinesis	3	AT5G11510, AT4G32830, AT2G45490	0.0636709	0.742682
Embryo sac cellularization	3	AT1G18370, AT3G43210, AT1G50240	0.0636709	0.742682
DNA strand elongation involved in DNA replication	3	AT5G46280, AT4G02060, AT2G16440	0.0636709	0.742682
Positive regulation of ATP-dependent microtubule motor activity, plus-end-directed	3	AT5G20110, AT3G16120, AT4G27360	0.0636709	0.742682
Tetrapyrrole metabolic process	8	AT1G54820, AT4G00165, AT2G39690, AT1G10657, AT3G06660, AT3G06880, AT3G23560, AT1G22400	0.0693198	0.797839
Plant-type hypersensitive response	13	AT3G54420, AT3G28910, AT1G32540, AT4G37980, AT4G37990, AT5G54250, AT4G12560, AT1G19250, AT3G07040, AT5G50260, AT3G50930, AT3G12500, AT2G26560	0.0697651	0.797839
Cellular response to organic cyclic compound	11	AT2G25735, AT5G08240, AT5G11970, AT5G15265, AT3G08030, AT1G17330, AT3G25882, AT4G24380, AT2G03350, AT5G60900, AT2G32030	0.0698051	0.797839
Macromolecule modification	8	AT1G26740, AT3G03770, AT1G56130, AT4G36180, AT3G59840, AT2G39020, AT5G62290, AT4G36970	0.0768583	0.872598
Actin nucleation	5	AT1G70140, AT4G14147, AT2G46225, AT3G05470, AT3G25500	0.0778115	0.877569
Anthocyanin-containing compound biosynthetic process	6	AT5G47740, AT1G12910, AT5G42800, AT3G61920, AT4G22880, AT2G43000	0.0809954	0.907468
Auxin homeostasis	8	AT5G55250, AT5G48930, AT1G80360, AT1G28130, AT5G54510, AT5G57090, AT5G47390, AT1G73590	0.0848562	0.920221
Response to endoplasmic reticulum stress	8	AT4G14420, AT1G14020, AT1G56340, AT4G24190, AT5G60640, AT5G01660, AT1G04980, AT1G21750	0.0848562	0.920221
Sterol metabolic process	8	AT3G50660, AT5G36110, AT5G42650, AT1G20050, AT3G19270, AT3G30180, AT4G15440, AT1G12740	0.0848562	0.920221
Abscisic acid transport	3	AT1G15520, AT1G69850, AT2G29940	0.0900857	0.920221
Regulation of microtubule polymerization or depolymerization	3	AT5G67270, AT3G54870, AT3G60660	0.0900857	0.920221
Fatty acid transport	3	AT3G61680, AT3G57280, AT1G17840	0.0900857	0.920221
Mitotic DNA replication initiation	3	AT1G44900, AT5G46280, AT2G16440	0.0900857	0.920221
Protein methylation	3	AT1G67330, AT1G79915, AT1G27930	0.0900857	0.920221
Post-translational protein modification	3	AT4G32830, AT1G09450, AT2G45490	0.0900857	0.920221
Male meiosis cytokinesis	3	AT3G23670, AT3G43210, AT1G50240	0.0900857	0.920221
Response to ionizing radiation	3	AT3G48190, AT5G52950, AT4G29170	0.0900857	0.920221
Histone phosphorylation	3	AT4G32830, AT1G76540, AT2G45490	0.0900857	0.920221
Plant-type cell wall modification	5	AT5G63800, AT1G70370, AT1G67330, AT5G62360, AT1G27930	0.0908375	0.920221
Very long-chain fatty acid metabolic process	5	AT1G01120, AT1G68530, AT4G16760, AT2G26250, AT2G34770	0.0908375	0.920221
Phosphate ion homeostasis	5	AT5G34850, AT3G51860, AT1G68320, AT1G30320, AT4G17550	0.0908375	0.920221
Response to biotic stimulus	6	AT1G11000, AT5G53760, AT4G33720, AT4G31470, AT4G25780, AT2G19990	0.0918577	0.920221
Brassinosteroid biosynthetic process	6	AT3G02580, AT3G19820, AT2G45400, AT3G50660, AT3G30180, AT1G12740	0.0918577	0.920221
Developmental growth	63	AT4G24130, AT2G36850, AT5G49800, AT5G67070, AT1G11545, AT5G57700, AT3G62630, AT2G18980, AT1G64390, AT3G54290, AT5G12950, AT5G11420, AT2G39690, AT5G03040, AT3G43110, AT5G59480, AT5G04970, AT2G47140, AT2G46330, AT3G55950, AT1G04040, AT5G62170, AT4G14750, AT1G53840, AT5G59970, AT5G08580, AT2G27920, AT4G35070, AT4G34500, AT1G62500, AT5G55050, AT3G51680, AT5G41140, AT3G05980, AT4G23740, AT3G59880, AT5…	0.09186	0.920221
Cellular developmental process	11	AT3G02120, AT4G37690, AT1G14020, AT3G42725, AT5G10160, AT4G11080, AT4G23740, AT2G05760, AT3G16490, AT1G12500, AT1G67040	0.0945588	0.941717
Plant epidermis development	36	AT5G47740, AT5G22400, AT5G49800, AT4G31840, AT2G16980, AT3G22104, AT5G12930, AT1G22330, AT2G20300, AT5G03040, AT4G11610, AT3G43110, AT1G07750, AT2G25150, AT2G47440, AT2G22560, AT1G01630, AT1G12020, AT3G50120, AT2G15220, AT1G17430, AT1G64080, AT3G56060, AT1G53920, AT4G20140, AT4G14750, AT3G61790, AT1G78860, AT3G11590, AT5G03870, AT2G22170, AT1G21310, AT4G30420, AT5G02540, AT5G42700, AT1G45688	0.0968052	0.953465
Radial pattern formation	4	AT2G42800, AT1G10657, AT4G13600, AT1G64390	0.0979779	0.953465
Cellular polysaccharide metabolic process	4	AT3G50120, AT3G63200, AT4G02340, AT1G76160	0.0979779	0.953465
Isoleucine biosynthetic process	4	AT3G49680, AT1G10070, AT3G20390, AT1G14810	0.0979779	0.953465
