# Supplementary material for: Genome-wide identification of cannabinoid biosynthesis genes in non-drug type Cannabis (Cannabis sativa L.) cultivar
Source: J Cannabis Res. 2024 Sep 7;6:35. doi: 10.1186/s42238-024-00246-8 (PMC11380790; doi:10.1186/s42238-024-00246-8)
Supplement: Supplementary file 6 — Supplementary Material 6: Supplementary Table S6. Lists of KEGG pathways from each gene cluster. [file 42238_2024_246_MOESM6_ESM.xlsx]

## Sheet: Sheet1
Cluster	KEGG term	Number of genes	PValue	Genes	Benjamini
1	Ribosome	13	9.99647e-05	AT1G64510, AT1G35680, AT4G01310, AT1G05190, AT3G54210, AT5G14320, AT1G29070, AT2G33450, AT1G78630, AT3G13120, AT1G79850, AT3G44890, AT4G17560	0.00599788
1	Biosynthesis of secondary metabolites	20	0.0224694	AT5G48930, AT1G10070, AT5G17230, AT3G04790, AT5G44640, AT1G01090, AT1G17650, AT4G37980, AT4G34350, AT2G40490, AT2G44480, AT1G54100, AT1G48320, AT1G13280, AT3G47450, AT1G22430, AT4G34200, AT1G73050, AT5G36160, AT3G14930	0.674081
1	Tyrosine metabolism	3	0.0577937	AT5G57170, AT1G22430, AT5G36160	1
2	Metabolic pathways	181	1.63639e-15	AT5G67030, AT4G01970, AT3G02570, AT2G30390, AT3G04870, AT1G61520, AT1G37130, AT1G60550, AT2G18700, AT1G59960, AT3G54050, AT4G01690, AT4G02260, AT5G64040, AT1G19150, AT1G05010, AT3G10230, AT1G08520, AT1G60950, AT1G76570, AT2G05100, AT3G47470, AT5G54190, AT4G14880, AT4G19010, AT4G38970, AT4G31780, AT2G42010, AT1G79040, AT5G23960, AT5G19220, AT1G12240, AT1G32070, AT3G26650, AT4G28660, AT1G08080, AT2…	1.47275e-13
2	Photosynthesis	26	7.54508e-15	AT4G04640, AT1G30380, AT1G14150, AT4G12800, AT1G31330, AT3G01440, AT4G09650, AT2G30570, AT5G64040, AT4G05180, AT1G03130, AT1G60950, AT1G79040, AT2G20260, AT1G08380, AT1G06680, AT3G55330, AT1G55670, AT4G03280, AT4G28660, AT1G03600, AT4G32260, AT1G20020, AT1G52230, AT4G14890, AT3G50820	3.39529e-13
2	Photosynthesis - antenna proteins	14	2.48643e-12	AT3G08940, AT1G61520, AT3G54890, AT1G15820, AT1G29930, AT1G19150, AT4G10340, AT3G61470, AT1G45474, AT2G40100, AT1G76570, AT2G05100, AT3G47470, AT5G54270	7.45928e-11
2	Biosynthesis of secondary metabolites	105	5.6681e-09	AT5G67030, AT3G02570, AT2G30390, AT3G04870, AT1G60550, AT2G18700, AT1G59960, AT3G54050, AT4G01690, AT2G36770, AT4G37000, AT3G44880, AT1G05010, AT3G10230, AT1G08520, AT5G54190, AT4G14880, AT4G19010, AT4G38970, AT2G42010, AT5G23960, AT5G19220, AT1G12240, AT1G32070, AT2G13360, AT3G47340, AT2G26670, AT4G26530, AT1G08550, AT4G01950, AT4G35090, AT2G36750, AT1G19920, AT5G09640, AT1G32900, AT1G52340, AT4…	1.27532e-07
2	Porphyrin metabolism	16	1.87604e-08	AT3G56940, AT2G30390, AT4G18480, AT4G01690, AT4G37000, AT5G13630, AT4G22920, AT3G44880, AT4G25080, AT4G16690, AT1G08520, AT1G74470, AT4G13250, AT5G54190, AT1G04620, AT2G26670	3.37687e-07
2	Glyoxylate and dicarboxylate metabolism	15	2.0773e-05	AT1G80380, AT2G35370, AT4G35090, AT1G68010, AT1G11860, AT2G13360, AT5G35630, AT1G70580, AT5G36700, AT5G04140, AT5G38430, AT4G17360, AT3G14420, AT4G33010, AT2G22780	0.000308556
2	Carbon fixation in photosynthetic organisms	14	2.39988e-05	AT1G32060, AT4G26530, AT5G44520, AT3G26650, AT3G54050, AT1G70580, AT4G15530, AT5G61410, AT1G43670, AT2G45290, AT5G38430, AT2G22780, AT3G55800, AT4G38970	0.000308556
2	Carotenoid biosynthesis	9	5.38939e-05	AT5G67030, AT4G19170, AT4G14210, AT3G04870, AT1G31800, AT1G08550, AT1G52340, AT3G10230, AT1G03055	0.000606306
2	Carbon metabolism	29	0.000145779	AT4G26530, AT1G32060, AT1G80380, AT3G59760, AT4G35090, AT3G54050, AT4G26270, AT1G32440, AT1G68010, AT1G11860, AT4G15530, AT5G36700, AT5G61410, AT1G43670, AT4G14880, AT2G22780, AT3G55800, AT4G38970, AT3G26650, AT5G44520, AT2G35370, AT2G13360, AT2G16790, AT1G70580, AT2G45290, AT5G38430, AT2G24270, AT3G14420, AT4G33010	0.00145779
2	Pentose phosphate pathway	10	0.00188601	AT4G26530, AT5G44520, AT1G43670, AT5G61410, AT2G45290, AT3G54050, AT4G26270, AT2G24270, AT4G38970, AT2G16790	0.0169741
2	Ubiquinone and other terpenoid-quinone biosynthesis	8	0.0025632	AT1G06570, AT3G63410, AT1G60550, AT1G64970, AT1G48320, AT1G18870, AT1G30520, AT4G19010	0.0209716
2	Nitrogen metabolism	8	0.00454049	AT5G35630, AT4G33580, AT1G37130, AT5G04140, AT1G70410, AT3G01500, AT3G52720, AT1G08080	0.0340537
2	Galactose metabolism	8	0.0207954	AT4G01970, AT5G40390, AT1G60470, AT1G12240, AT3G57520, AT2G47180, AT4G26270, AT3G52840	0.143968
2	Glycine, serine and threonine metabolism	8	0.0552407	AT1G70580, AT1G80380, AT2G35370, AT1G68010, AT5G28237, AT4G33010, AT1G11860, AT2G13360	0.355119
2	Biosynthesis of cofactors	18	0.0720471	AT3G02570, AT2G30390, AT1G06570, AT1G60550, AT1G64970, AT1G18870, AT1G30520, AT4G01690, AT1G73010, AT5G59750, AT5G54770, AT3G63410, AT1G74960, AT1G48320, AT2G29630, AT5G01410, AT1G21640, AT5G35170	0.432283
2	Fructose and mannose metabolism	7	0.0881033	AT4G26530, AT3G02570, AT1G43670, AT3G54050, AT4G26270, AT1G07110, AT4G38970	0.495581
3	Autophagy - other	3	0.0683815	AT2G37840, AT4G29380, AT3G07525	1
4	Biosynthesis of secondary metabolites	129	1.3124e-09	AT4G25420, AT4G31940, AT1G08250, AT1G59960, AT3G17390, AT1G67980, AT2G20900, AT3G22740, AT5G14500, AT1G35910, AT1G52760, AT1G27680, AT5G05340, AT5G07920, AT3G10230, AT3G50660, AT1G15110, AT3G21240, AT2G36780, AT1G44170, AT1G48130, AT3G19450, AT2G31810, AT3G52600, AT5G06720, AT1G15080, AT4G15560, AT5G25900, AT5G48930, AT2G30490, AT1G09240, AT1G68850, AT4G32810, AT5G63770, AT4G35090, AT2G37040, AT5…	1.57488e-07
4	Phenylpropanoid biosynthesis	27	5.83013e-08	AT5G48930, AT2G30490, AT1G68850, AT1G67980, AT1G30760, AT2G37040, AT3G53260, AT2G34790, AT3G24503, AT2G39420, AT4G34050, AT1G49570, AT1G52760, AT5G05340, AT4G33420, AT5G06730, AT2G40890, AT1G15950, AT3G21240, AT2G37130, AT5G42180, AT1G72680, AT4G36220, AT1G48130, AT3G19450, AT5G06720, AT5G54160	3.49808e-06
4	Metabolic pathways	193	1.83975e-06	AT4G25420, AT1G08250, AT3G25570, AT1G59960, AT5G49720, AT3G17390, AT2G20900, AT3G22740, AT5G14500, AT1G30620, AT5G13640, AT1G52760, AT1G27680, AT5G05340, AT1G43800, AT3G50660, AT1G15110, AT4G04955, AT5G24090, AT5G37600, AT1G48130, AT1G49340, AT3G19450, AT2G31810, AT3G52600, AT4G16130, AT2G30490, AT1G09240, AT1G70410, AT5G20280, AT1G32100, AT2G35020, AT1G49570, AT1G32900, AT5G20960, AT1G61820, AT2…	7.35901e-05
4	Stilbenoid, diarylheptanoid and gingerol biosynthesis	5	0.00149364	AT2G30490, AT5G48930, AT4G34050, AT1G67980, AT2G40890	0.0448092
4	Plant hormone signal transduction	32	0.00230055	AT5G06839, AT5G47220, AT2G33860, AT3G23150, AT3G56850, AT4G35900, AT5G65210, AT5G46570, AT2G36210, AT3G21510, AT2G38310, AT2G19990, AT5G57560, AT5G10990, AT1G77920, AT5G35750, AT2G46370, AT1G08320, AT2G46690, AT1G09530, AT2G25490, AT1G75080, AT3G03450, AT2G33310, AT1G68640, AT2G38120, AT1G14920, AT2G41370, AT4G29080, AT1G19180, AT3G16500, AT2G47750	0.0466609
4	Starch and sucrose metabolism	22	0.00233305	AT3G29320, AT5G49720, AT4G29130, AT5G20280, AT1G68020, AT1G35910, AT4G25000, AT5G54570, AT1G71380, AT4G12430, AT1G32900, AT1G04920, AT1G26560, AT1G27680, AT5G03650, AT3G52600, AT1G69830, AT4G18240, AT4G39010, AT1G73370, AT1G61820, AT4G17770	0.0466609
4	Arginine and proline metabolism	10	0.00585448	AT1G44170, AT5G38710, AT3G25570, AT4G33910, AT1G20270, AT1G23820, AT2G30970, AT3G28480, AT5G13700, AT5G18900	0.100363
4	Flavonoid biosynthesis	6	0.017743	AT2G30490, AT5G48930, AT4G34050, AT5G07990, AT1G67980, AT2G40890	0.266145
4	Biosynthesis of various plant secondary metabolites	10	0.0210807	AT1G02500, AT5G54570, AT1G26560, AT4G31940, AT1G09240, AT3G06350, AT1G59960, AT3G17390, AT1G32100, AT1G61820	0.281076
4	ABC transporters	10	0.0251633	AT1G02520, AT1G15520, AT3G28345, AT2G41700, AT4G18050, AT2G36910, AT1G71960, AT2G36380, AT3G53480, AT1G17840	0.301959
4	Glycolysis / Gluconeogenesis	14	0.0347421	AT5G47810, AT3G52990, AT2G36460, AT4G26270, AT4G29130, AT3G61610, AT5G14500, AT1G44170, AT4G37870, AT1G76550, AT4G33070, AT5G54960, AT1G77120, AT4G17260	0.379005
4	Nitrogen metabolism	7	0.0500111	AT5G37600, AT4G37560, AT5G53460, AT5G14570, AT1G70410, AT3G01500, AT1G08080	0.488697
4	Glycerolipid metabolism	9	0.0529422	AT1G44170, AT5G13640, AT3G11430, AT5G07920, AT5G63770, AT3G02600, AT2G20900, AT5G08370, AT1G15080	0.488697
4	Cysteine and methionine metabolism	13	0.0876096	AT3G08860, AT3G25570, AT1G09240, AT3G17390, AT2G30970, AT3G22740, AT5G17920, AT3G63250, AT1G02500, AT1G23820, AT1G49820, AT4G17260, AT1G04410	0.725257
4	Glycerophospholipid metabolism	11	0.0906572	AT4G25970, AT1G15110, AT3G10370, AT3G11430, AT5G07920, AT5G63770, AT2G26870, AT3G02600, AT2G20900, AT1G15080, AT2G32260	0.725257
4	Alanine, aspartate and glutamate metabolism	7	0.0978993	AT5G37600, AT3G17760, AT5G53460, AT3G08860, AT2G30970, AT3G22200, AT3G24090	0.734244
5	Biosynthesis of amino acids	35	4.29979e-08	AT1G17745, AT2G37500, AT1G13440, AT4G24830, AT2G30970, AT2G17630, AT3G22960, AT2G36530, AT2G36230, AT5G11520, AT5G56350, AT3G10050, AT5G11880, AT2G01140, AT1G74030, AT4G39980, AT2G22480, AT5G16290, AT3G29200, AT4G02610, AT2G36460, AT2G19940, AT5G34930, AT3G23940, AT5G17920, AT5G10920, AT1G16300, AT1G15710, AT2G36880, AT5G10240, AT5G38530, AT4G34200, AT1G74040, AT2G29560, AT2G22250	5.03075e-06
5	Carbon metabolism	29	0.000243707	AT1G17745, AT1G13440, AT5G24400, AT5G15530, AT5G48230, AT2G30970, AT2G17630, AT3G22960, AT2G36530, AT2G35120, AT5G11520, AT5G56350, AT3G10050, AT2G01140, AT1G74030, AT2G22480, AT5G18170, AT4G24620, AT4G31810, AT2G36460, AT1G16300, AT2G47510, AT3G47520, AT1G79750, AT1G47840, AT1G06550, AT2G41530, AT4G34200, AT2G29560	0.00861667
5	Biosynthesis of secondary metabolites	91	0.000256967	AT1G13560, AT2G37500, AT3G03980, AT1G13440, AT5G17330, AT1G05260, AT5G14220, AT5G48230, AT2G36530, AT2G35120, AT2G20340, AT4G09020, AT1G77420, AT5G05340, AT1G05010, AT2G01140, AT1G20330, AT4G39660, AT1G74030, AT3G17940, AT4G39980, AT3G25180, AT2G22480, AT5G16290, AT3G43190, AT3G29200, AT1G12000, AT4G24620, AT5G14130, AT4G02610, AT3G21240, AT2G36460, AT2G19940, AT1G31220, AT5G34930, AT3G23940, AT5…	0.00861667
5	Glycolysis / Gluconeogenesis	17	0.000294587	AT1G12000, AT1G13440, AT5G24760, AT4G24620, AT2G36460, AT3G22960, AT1G16300, AT2G36530, AT3G47800, AT5G56350, AT5G01670, AT2G01140, AT1G47840, AT1G74030, AT2G29560, AT3G17940, AT2G22480	0.00861667
5	Metabolic pathways	149	0.00066366	AT5G42370, AT1G13560, AT2G37500, AT5G26600, AT1G13440, AT5G17330, AT3G09640, AT1G05260, AT5G14220, AT3G58130, AT5G48230, AT2G36530, AT2G20340, AT5G13520, AT1G77420, AT4G13710, AT5G05340, AT1G05010, AT2G01140, AT4G39660, AT1G74030, AT3G17940, AT5G42810, AT2G22480, AT1G12000, AT4G24620, AT3G21240, AT3G23940, AT3G23820, AT2G19590, AT1G24100, AT4G13940, AT5G38530, AT5G12040, AT5G01670, AT1G47840, AT1…	0.0155296
5	Alanine, aspartate and glutamate metabolism	10	0.00090742	AT5G11520, AT5G17330, AT5G10240, AT3G20330, AT4G24830, AT5G12040, AT2G30970, AT4G39660, AT5G10920, AT5G18170	0.0176947
5	Phenylalanine, tyrosine and tryptophan biosynthesis	9	0.00675192	AT3G29200, AT5G11520, AT5G38530, AT4G02610, AT2G30970, AT5G34930, AT4G39980, AT1G15710, AT2G22250	0.112854
5	Arginine biosynthesis	7	0.00870161	AT5G11520, AT2G37500, AT4G24830, AT2G30970, AT2G19940, AT5G10920, AT5G18170	0.125905
5	Cysteine and methionine metabolism	14	0.00968497	AT1G17745, AT5G26600, AT2G30970, AT2G17630, AT5G17920, AT2G36880, AT5G11520, AT2G19590, AT4G13940, AT3G47520, AT1G05010, AT4G39660, AT4G19020, AT4G34200	0.125905
5	Ascorbate and aldarate metabolism	9	0.0135697	AT5G15490, AT5G11540, AT3G09640, AT4G30440, AT5G01670, AT1G02000, AT4G35000, AT3G23820, AT2G46760	0.158766
5	Glycine, serine and threonine metabolism	9	0.0244214	AT1G17745, AT3G10050, AT5G38530, AT4G02610, AT1G74920, AT2G17630, AT4G39660, AT4G34200, AT2G35120	0.238223
5	Pyruvate metabolism	11	0.0244331	AT2G47510, AT5G56350, AT5G06580, AT5G24760, AT3G47520, AT5G15530, AT1G79750, AT5G01670, AT5G48230, AT3G22960, AT1G74040	0.238223
5	Amino sugar and nucleotide sugar metabolism	13	0.0366748	AT5G15490, AT5G17770, AT4G24620, AT5G15650, AT5G20080, AT3G62830, AT3G08900, AT3G23820, AT3G19620, AT4G30440, AT1G47840, AT1G02000, AT3G12500	0.330073
5	Endocytosis	14	0.0569307	AT5G65270, AT5G47960, AT4G21160, AT1G60430, AT3G27000, AT4G09720, AT1G10630, AT4G35790, AT1G71790, AT1G47830, AT3G20290, AT3G15730, AT5G02500, AT1G01200	0.461979
5	Carbon fixation in photosynthetic organisms	8	0.0592281	AT5G11520, AT1G13440, AT3G47520, AT2G36460, AT1G79750, AT2G01140, AT2G30970, AT1G16300	0.461979
5	Purine metabolism	9	0.0728949	AT4G12440, AT4G13720, AT1G71750, AT4G14930, AT5G03300, AT2G14750, AT1G31220, AT4G29680, AT5G18280	0.493086
5	Various types of N-glycan biosynthesis	5	0.0765097	AT4G21150, AT5G19690, AT1G16900, AT1G49710, AT5G66680	0.493086
5	Butanoate metabolism	4	0.0778753	AT5G17330, AT4G11820, AT5G48230, AT5G16290	0.493086
5	2-Oxocarboxylic acid metabolism	8	0.0800738	AT5G11520, AT2G37500, AT1G24100, AT2G30970, AT2G19940, AT3G23940, AT1G74040, AT5G16290	0.493086
5	Valine, leucine and isoleucine biosynthesis	4	0.0875868	AT3G10050, AT3G23940, AT1G74040, AT5G16290	0.512383
5	Isoquinoline alkaloid biosynthesis	4	0.0977796	AT2G20340, AT5G11520, AT2G30970, AT2G22250	0.544772
6	Ribosome	87	6.58566e-16	AT4G25740, AT3G52590, AT3G05560, AT4G31985, AT5G22440, AT1G57860, AT1G36240, AT3G59540, AT5G61170, AT1G72370, AT2G37270, AT4G27090, AT3G20230, AT3G62870, AT5G23535, AT2G40590, AT4G31460, AT1G74270, AT3G10950, AT5G59240, AT3G53890, AT2G36620, AT1G07070, AT1G64880, AT4G17390, AT1G08360, AT2G31610, AT4G09800, AT1G67430, AT5G54600, AT2G34480, AT3G04400, AT3G04840, AT2G19740, AT4G29430, AT1G70600, AT3…	8.10037e-14
6	DNA replication	18	2.52337e-07	AT1G44900, AT1G08260, AT2G29570, AT4G18590, AT1G67630, AT5G41880, AT1G67320, AT5G46280, AT4G02060, AT2G16440, AT1G09815, AT1G21690, AT5G08020, AT4G20325, AT1G08840, AT5G44635, AT2G25100, AT2G07690	1.55187e-05
6	Flavonoid biosynthesis	12	1.02978e-05	AT5G13930, AT3G51240, AT5G48930, AT5G05270, AT3G55120, AT5G08640, AT5G07990, AT1G67980, AT5G42800, AT2G40890, AT1G61720, AT4G22880	0.000422209
6	Fatty acid metabolism	19	0.000112733	AT1G43800, AT3G03980, AT1G67730, AT5G46290, AT2G30200, AT3G55360, AT3G16170, AT1G49430, AT3G12120, AT1G74960, AT1G24360, AT1G24470, AT2G43710, AT5G10160, AT2G47240, AT5G35360, AT1G36160, AT4G16760, AT2G05990	0.00346655
6	Fatty acid biosynthesis	14	0.000176547	AT1G43800, AT3G03980, AT5G46290, AT2G30200, AT3G16170, AT1G49430, AT1G74960, AT1G24360, AT2G43710, AT5G10160, AT2G47240, AT5G35360, AT1G36160, AT2G05990	0.00434307
6	Biosynthesis of secondary metabolites	162	0.000250157	AT5G17050, AT5G42250, AT1G80560, AT3G28200, AT1G05260, AT1G61120, AT5G42650, AT1G67980, AT3G57560, AT1G14810, AT4G29740, AT1G35910, AT2G17570, AT2G36770, AT3G18080, AT2G20340, AT1G19670, AT5G05340, AT1G50460, AT3G04080, AT5G04530, AT2G22240, AT1G01610, AT2G06050, AT4G15210, AT1G03475, AT5G23960, AT3G02580, AT5G51810, AT3G50660, AT2G30200, AT3G03310, AT2G36780, AT5G13930, AT1G26640, AT4G38460, AT3…	0.00512821
6	Fatty acid elongation	10	0.00718926	AT1G01120, AT1G67730, AT1G24470, AT1G68530, AT2G28630, AT3G55360, AT1G04220, AT2G26640, AT5G04530, AT2G26250	0.126326
6	Homologous recombination	13	0.0134784	AT4G21070, AT3G48190, AT4G02110, AT4G18590, AT1G09815, AT5G08020, AT1G07745, AT3G19210, AT1G04020, AT2G45280, AT2G28560, AT5G20850, AT5G01630	0.192631
6	Phenylpropanoid biosynthesis	22	0.0140949	AT5G48930, AT5G66390, AT3G28200, AT1G05260, AT1G67980, AT3G17070, AT2G37040, AT5G17820, AT1G65060, AT2G18980, AT3G24503, AT4G37980, AT4G37990, AT1G71695, AT5G05340, AT1G44970, AT5G51890, AT5G06730, AT4G16270, AT4G39330, AT2G40890, AT5G54160	0.192631
6	Biotin metabolism	6	0.0164533	AT3G03980, AT1G74960, AT1G24360, AT5G46290, AT5G10160, AT2G05990	0.202376
6	Biosynthesis of unsaturated fatty acids	7	0.0322326	AT1G43800, AT1G67730, AT3G12120, AT1G24470, AT2G43710, AT3G55360, AT4G16760	0.360419
6	Pyrimidine metabolism	12	0.048756	AT3G46940, AT3G12670, AT3G18680, AT2G23820, AT5G63310, AT4G22930, AT3G25400, AT3G04080, AT3G48540, AT2G21790, AT3G27060, AT3G07800	0.499749
6	Metabolic pathways	258	0.0528497	AT1G08490, AT3G09640, AT1G80560, AT5G42650, AT3G54690, AT1G14810, AT5G49160, AT2G20340, AT3G46940, AT1G50460, AT5G05340, AT3G04080, AT3G14310, AT1G01610, AT2G06050, AT2G21790, AT1G03475, AT3G02580, AT5G51810, AT1G43800, AT3G50660, AT4G34700, AT1G14700, AT3G03310, AT5G24090, AT1G65290, AT3G20440, AT1G36160, AT2G05990, AT3G51160, AT5G19730, AT1G12050, AT4G21760, AT1G32100, AT1G65060, AT3G07800, AT5…	0.50004
6	Glycosphingolipid biosynthesis - globo and isoglobo series	4	0.0881423	AT1G05590, AT1G65590, AT1G61050, AT5G08380	0.752451
6	Mismatch repair	7	0.0917623	AT1G09815, AT1G21690, AT5G08020, AT2G29570, AT4G18590, AT3G24495, AT4G02070	0.752451
