# Supplementary material for: Genome-wide identification of cannabinoid biosynthesis genes in non-drug type Cannabis (Cannabis sativa L.) cultivar
Source: J Cannabis Res. 2024 Sep 7;6:35. doi: 10.1186/s42238-024-00246-8 (PMC11380790; doi:10.1186/s42238-024-00246-8)
Supplement: Supplementary file 7 — Supplementary Material 7: Supplementary Table S7. Average FPKM of cannabinoid biosynthesis pathway genes in various plant tissues (flower, leaf, stem). [file 42238_2024_246_MOESM7_ESM.xlsx]

## Sheet: Sheet1
Gene_ID	Gene description	Flower FPKM	Leaf FPKM	Stem FPKM
115724480	AAE	4.68828	0.001	0.001
115709751	AAE	75.0012	0.0532527	0.051038
115725729	AAE	19.9229	0.0988057	0.01504
115695955	AAE	20.9717	0.140402	0.263773
115702591	AAE	1.19855	0.0746153	0.001
115704151	AAE	0.22865	1.78189	1.40475
115722340	AAE	61.275	4.20588	10.4681
115713865	AAE	28.0702	131.239	14.7409
115709750	AAE	5.32285	13.1431	21.8104
115725659	AAE	14.2202	7.71197	13.6691
115704844	AAE	3.26965	2.07837	3.92677
115724725	AAE	1.25904	0.001	0.022698
115722980	AAE	16.0588	6.0771	15.8884
115722378	AAE	12.0029	22.0657	26.2979
115716315	AAE	27.4732	105.114	32.4244
115721297	AAE	6.1572	12.3385	5.33446
115699293	TKS	113.627	0.138579	0.001
115700696	TKS	92.1778	0.0188203	0.001
115704317	TKS	1.43001	0.001	0.199428
115723437	OAC	353.296	0.001	0.071023
115723438	OAC	532.309	0.001	0.126344
115697919	GPP synthase	8.29477	7.29518	6.88318
115707809	PT	2.30428	0.407517	1.31452
115713148	PT	13.3426	0.859114	0.001
115713171	PT	11.0673	0.001	0.001
115713185	PT	28.8812	0.001	0.001
115713205	PT	8.66135	0.001	0.001
115713215	PT	20.9165	0.107253	0.001
115722991	PT	8.54933	0.001	0.001
115697762	CBDA synthase	43.9097	0.043482	0.0176917
115696884	THCA synthase	4.08173	0.0477033	0.001
115697880	CBCA synthase	5.65301	0.001	0.001
